# Supplementary material for: Enterococcus faecium Regulates Honey Bee Developmental Genes
Source: Int J Mol Sci. 2021 Nov 9;22(22):12105. doi: 10.3390/ijms222212105 (PMC8621553; doi:10.3390/ijms222212105)
Supplement: Supplementary file 1 [file ijms-22-12105-s001.zip]

Archive with 11 entries (11 files):
- E.faecium_sup_fig_20210922.pdf
- TableS10_sRNA-Seq_gene_enrichment.xlsx
- TableS1_E_faecium_135_genome.xlsx
- TableS2_bacteria_genome_annotation.xlsx
- TableS3_bactericin.xlsx
- TableS4_RNA-Seq_statistic.xlsx
- TableS5_DEgenes_in_pathway.xlsx
- TableS6_RNA-Seq_DESeq2.xlsx
- TableS7_sRNA-Seq_statistic.xlsx
- TableS8_sRNA-Seq_DESeq2.xlsx
- TableS9_DEmiRNA_target_development.xlsx
