# Supplementary material for: Enterococcus faecium Regulates Honey Bee Developmental Genes
Source: Int J Mol Sci. 2021 Nov 9;22(22):12105. doi: 10.3390/ijms222212105 (PMC8621553; doi:10.3390/ijms222212105)
Supplement: Supplementary file 1 [file ijms-22-12105-s001.zip › TableS1_E_faecium_135_genome.xlsx]

## Sheet: prokaryotes
#Organism Name	Organism Groups	Strain	BioSample	BioProject	Assembly	host	host status	source	strain_note
Enterococcus faecium	Bacteria;Terrabacteria group;Firmicutes	QU 50	SAMD00112300	PRJDB4468	GCA_006741355.1	dry soil
Enterococcus faecium	Bacteria;Terrabacteria group;Firmicutes	KUHS13	SAMD00202474	PRJDB9240	GCA_009938285.1	Homo sapiens(Japan)	missing	missing	VRE
Enterococcus faecium	Bacteria;Terrabacteria group;Firmicutes	EFE10021	SAMEA3726417	PRJEB12395	GCA_900066025.1	Homo sapiens	Commensal E. faecium isolate from non-hospitalised person	faeces
Enterococcus faecium	Bacteria;Terrabacteria group;Firmicutes	EFE11651	SAMEA3726428	PRJEB12401	GCA_900044005.1	Homo sapiens	hospitalised	wound/soft tissue	clinical isolate
Enterococcus faecium	Bacteria;Terrabacteria group;Firmicutes	Ef_aus00233	SAMEA4067785	PRJEB14733	GCA_900092475.1	Homo sapiens	healthy	clinical	VRE
Enterococcus faecium	Bacteria;Terrabacteria group;Firmicutes	E8202	SAMEA4885631	PRJEB28495	GCA_900639535.1	Homo sapiens		clinical	VRE
Enterococcus faecium	Bacteria;Terrabacteria group;Firmicutes	E8414	SAMEA4885787	PRJEB28495	GCA_900639715.1	Homo sapiens		clinical	VRE
Enterococcus faecium	Bacteria;Terrabacteria group;Firmicutes	E7240	SAMEA4885079	PRJEB28495	GCA_900639485.1	Homo sapiens		clinical
Enterococcus faecium	Bacteria;Terrabacteria group;Firmicutes	E7429	SAMEA4885211	PRJEB28495	GCA_900639465.1	Homo sapiens		clinical	VRE
Enterococcus faecium	Bacteria;Terrabacteria group;Firmicutes	E7933	SAMEA4885473	PRJEB28495	GCA_900639545.1	Homo sapiens		clinical	VRE
Enterococcus faecium	Bacteria;Terrabacteria group;Firmicutes	E8328	SAMEA4885722	PRJEB28495	GCA_900639615.1	Homo sapiens		clinical
Enterococcus faecium	Bacteria;Terrabacteria group;Firmicutes	E8377	SAMEA4885755	PRJEB28495	GCA_900639595.1	Homo sapiens		clinical
Enterococcus faecium	Bacteria;Terrabacteria group;Firmicutes	E8284	SAMEA4885688	PRJEB28495	GCA_900639625.1	Homo sapiens		clinical
Enterococcus faecium	Bacteria;Terrabacteria group;Firmicutes	E6975	SAMEA4884860	PRJEB28495	GCA_900639395.1	Homo sapiens		clinical
Enterococcus faecium	Bacteria;Terrabacteria group;Firmicutes	E8290	SAMEA4885694	PRJEB28495	GCA_900639605.1	Homo sapiens		clinical
Enterococcus faecium	Bacteria;Terrabacteria group;Firmicutes	E7356	SAMEA4885156	PRJEB28495	GCA_900639505.1	Homo sapiens		clinical	VRE
Enterococcus faecium	Bacteria;Terrabacteria group;Firmicutes	E7471	SAMEA4885231	PRJEB28495	GCA_900639495.1	Homo sapiens		clinical	VRE
Enterococcus faecium	Bacteria;Terrabacteria group;Firmicutes	E8014	SAMEA4885529	PRJEB28495	GCA_900639575.1	Homo sapiens		clinical	VRE
Enterococcus faecium	Bacteria;Terrabacteria group;Firmicutes	E8195	SAMEA4885624	PRJEB28495	GCA_900639565.1	Homo sapiens		clinical
Enterococcus faecium	Bacteria;Terrabacteria group;Firmicutes	E7199	SAMEA4885040	PRJEB28495	GCA_900639445.1	Homo sapiens		clinical
Enterococcus faecium	Bacteria;Terrabacteria group;Firmicutes	E7025	SAMEA4884910	PRJEB28495	GCA_900639355.1	Homo sapiens		clinical
Enterococcus faecium	Bacteria;Terrabacteria group;Firmicutes	E7171	SAMEA4885012	PRJEB28495	GCA_900639365.1	Homo sapiens		clinical
Enterococcus faecium	Bacteria;Terrabacteria group;Firmicutes	E7654	SAMEA4885352	PRJEB28495	GCA_900639515.1	Homo sapiens		clinical	VRE
Enterococcus faecium	Bacteria;Terrabacteria group;Firmicutes	E7663	SAMEA4885360	PRJEB28495	GCA_900639525.1	Homo sapiens		clinical	VRE
Enterococcus faecium	Bacteria;Terrabacteria group;Firmicutes	E4438	SAMEA4884718	PRJEB28495	GCA_900638825.1	Homo sapiens		clinical
Enterococcus faecium	Bacteria;Terrabacteria group;Firmicutes	E4402	SAMEA4884683	PRJEB28495	GCA_900638805.1	Homo sapiens		clinical
Enterococcus faecium	Bacteria;Terrabacteria group;Firmicutes	E6988	SAMEA4884873	PRJEB28495	GCA_900639415.1	Homo sapiens		clinical
Enterococcus faecium	Bacteria;Terrabacteria group;Firmicutes	E7067	SAMEA4884945	PRJEB28495	GCA_900639335.1	Homo sapiens		clinical
Enterococcus faecium	Bacteria;Terrabacteria group;Firmicutes	E6055	SAMEA4884801	PRJEB28495	GCA_900639345.1	Homo sapiens		clinical
Enterococcus faecium	Bacteria;Terrabacteria group;Firmicutes	E7237	SAMEA4885076	PRJEB28495	GCA_900639455.1	Homo sapiens		clinical
Enterococcus faecium	Bacteria;Terrabacteria group;Firmicutes	E4457	SAMEA4884735	PRJEB28495	GCA_900639405.1	Homo sapiens		clinical
Enterococcus faecium	Bacteria;Terrabacteria group;Firmicutes	E8423	SAMEA4885795	PRJEB28495	GCA_900639725.1	Homo sapiens		clinical	VRE
Enterococcus faecium	Bacteria;Terrabacteria group;Firmicutes	E6043	SAMEA4884790	PRJEB28495	GCA_900635415.1	Homo sapiens		clinical
Enterococcus faecium	Bacteria;Terrabacteria group;Firmicutes	E8172	SAMEA4885602	PRJEB28495	GCA_900639555.1	Homo sapiens		clinical	VRE
Enterococcus faecium	Bacteria;Terrabacteria group;Firmicutes	E7098	SAMEA4884974	PRJEB28495	GCA_900639425.1	Homo sapiens		clinical
Enterococcus faecium	Bacteria;Terrabacteria group;Firmicutes	E1774	SAMEA4884544	PRJEB28495	GCA_900638785.1	Homo sapiens		clinical
Enterococcus faecium	Bacteria;Terrabacteria group;Firmicutes	E7040	SAMEA4884924	PRJEB28495	GCA_900639385.1	Homo sapiens		clinical
Enterococcus faecium	Bacteria;Terrabacteria group;Firmicutes	E7948	SAMEA4885488	PRJEB28495	GCA_900639585.1	Homo sapiens		clinical	VRE
Enterococcus faecium	Bacteria;Terrabacteria group;Firmicutes	E4456	SAMEA4884734	PRJEB28495	GCA_900639745.1	Homo sapiens		clinical
Enterococcus faecium	Bacteria;Terrabacteria group;Firmicutes	E8691	SAMEA4885878	PRJEB28495	GCA_900639655.1	Homo sapiens		clinical
Enterococcus faecium	Bacteria;Terrabacteria group;Firmicutes	E8927	SAMEA4885924	PRJEB28495	GCA_900639635.1	Homo sapiens		clinical
Enterococcus faecium	Bacteria;Terrabacteria group;Firmicutes	E2079	SAMEA4884567	PRJEB28495	GCA_900638765.1	Homo sapiens		clinical
Enterococcus faecium	Bacteria;Terrabacteria group;Firmicutes	E1334	SAMEA4884531	PRJEB28495	GCA_900635365.1	Homo sapiens		clinical
Enterococcus faecium	Bacteria;Terrabacteria group;Firmicutes	E0139	SAMEA4884426	PRJEB28495	GCA_900634805.1	Homo sapiens		clinical
Enterococcus faecium	Bacteria;Terrabacteria group;Firmicutes	E0595	SAMEA4884467	PRJEB28495	GCA_900638815.1	Homo sapiens		clinical
Enterococcus faecium	Bacteria;Terrabacteria group;Firmicutes	E9101	SAMEA4885972	PRJEB28495	GCA_900639705.1	Homo sapiens		clinical
Enterococcus faecium	Bacteria;Terrabacteria group;Firmicutes	E4227	SAMEA4884646	PRJEB28495	GCA_900638775.1	Homo sapiens		clinical
Enterococcus faecium	Bacteria;Terrabacteria group;Firmicutes	E4239	SAMEA4884658	PRJEB28495	GCA_900640265.1	Homo sapiens		clinical
Enterococcus faecium	Bacteria;Terrabacteria group;Firmicutes	3012STDY6244127	SAMEA3614259	PRJEB6403	GCA_900683475.1	not available	not available	not available
Enterococcus faecium	Bacteria;Terrabacteria group;Firmicutes	NCTC7174	SAMEA4557825	PRJEB6403	GCA_900637035.1	not available	not available	not available
Enterococcus faecium Aus0085	Bacteria;Terrabacteria group;Firmicutes	AUS0085	SAMN02604219	PRJNA193299	GCA_000444405.1				VRE
Enterococcus faecium T110	Bacteria;Terrabacteria group;Firmicutes	T110	SAMN02194078	PRJNA207757	GCA_000737555.1				probiotic
Enterococcus faecium	Bacteria;Terrabacteria group;Firmicutes	FDAARGOS_323	SAMN06173336	PRJNA231221	GCA_002983785.1	Homo sapiens male	Bacteremia	blood	clinical isolate
Enterococcus faecium	Bacteria;Terrabacteria group;Firmicutes	CFSAN059071	SAMN06621457	PRJNA243331	GCA_003071445.1	Homo sapiens	bacteriuria	urine	clinical isolate
Enterococcus faecium	Bacteria;Terrabacteria group;Firmicutes	CFSAN059070	SAMN06621458	PRJNA243331	GCA_003071425.1	Homo sapiens	bacteriuria	urine	clinical isolate
Enterococcus faecium	Bacteria;Terrabacteria group;Firmicutes	UW8175	SAMN03339922	PRJNA275194	GCA_001587115.1	Homo sapiens	wohle organism	clinical isolate	Tigecycline resistance
Enterococcus faecium	Bacteria;Terrabacteria group;Firmicutes	E39	SAMN03486724	PRJNA281247	GCA_001635875.1	Homo sapiens		blood	daptomycin-resistant
Enterococcus faecium	Bacteria;Terrabacteria group;Firmicutes	F17E0263	SAMN11942429	PRJNA292665	GCA_006280355.1	young chicken			foodborne pathogens
Enterococcus faecium	Bacteria;Terrabacteria group;Firmicutes	N56454	SAMN11942428	PRJNA292665	GCA_006351845.1	retail chicken			foodborne pathogens
Enterococcus faecium	Bacteria;Terrabacteria group;Firmicutes	FSIS1608820	SAMN08689723	PRJNA292669	GCA_004332055.1	cow		animal-cattle-steer	linezolid resistance
Enterococcus faecium	Bacteria;Terrabacteria group;Firmicutes	ISMMS_VRE_1	SAMN03988632	PRJNA292786	GCA_001720945.1	Homo sapiens	Enterococcus bacteremia	blood	VRE
Enterococcus faecium	Bacteria;Terrabacteria group;Firmicutes	ISMMS_VRE_7	SAMN03988624	PRJNA292801	GCA_001721065.1	Homo sapiens	Enterococcus bacteremia	blood	VRE
Enterococcus faecium	Bacteria;Terrabacteria group;Firmicutes	ISMMS_VRE_9	SAMN03988627	PRJNA292804	GCA_001953255.1	Homo sapiens	Enterococcus bacteremia	blood	VRE
Enterococcus faecium	Bacteria;Terrabacteria group;Firmicutes	ISMMS_VRE_11	SAMN03988630	PRJNA292807	GCA_001721905.1	Homo sapiens	Enterococcus bacteremia	blood	VRE
Enterococcus faecium	Bacteria;Terrabacteria group;Firmicutes	ISMMS_VRE_12	SAMN03988631	PRJNA292809	GCA_001953235.1	Homo sapiens	Enterococcus bacteremia	blood	VRE
Enterococcus faecium	Bacteria;Terrabacteria group;Firmicutes	23437	SAMN04009964	PRJNA293793	GCA_001298485.1	Homo sapiens	human patient	stool
Enterococcus faecium	Bacteria;Terrabacteria group;Firmicutes	E745	SAMN04045274	PRJNA295268	GCA_001750885.1	Homo sapiens	hospital	bodily fluid
Enterococcus faecium	Bacteria;Terrabacteria group;Firmicutes	UW7606x64/3 TC1	SAMN04201208	PRJNA299371	GCA_001412695.1			laboratory	VRE
Enterococcus faecium DO	Bacteria;Terrabacteria group;Firmicutes	DO	SAMN00002237	PRJNA30627	GCA_000174395.2	Homo sapiens		Blood	Pathogen
Enterococcus faecium	Bacteria;Terrabacteria group;Firmicutes	6000000	SAMN04418075	PRJNA308959	GCA_001518735.1	Homo sapiens	Enterococcus faecium infection	feces
Enterococcus faecium	Bacteria;Terrabacteria group;Firmicutes	ATCC 700221	SAMN04488250	PRJNA311738	GCA_001594345.1	Homo sapiens(USA: Connecticut)		feces	VRE
Enterococcus faecium	Bacteria;Terrabacteria group;Firmicutes	A_020709_82	SAMN06006823	PRJNA344739	GCA_002442955.1	Homo sapiens(Netherlands: University Medical Centre Utrecht, Utrecht)		feces	Pathogen
Enterococcus faecium	Bacteria;Terrabacteria group;Firmicutes	E232	SAMN05933398	PRJNA349966	GCA_002777275.1	Homo sapiens	localized adiposity	wound	daptomycin resistance
Enterococcus faecium	Bacteria;Terrabacteria group;Firmicutes	E240	SAMN05933399	PRJNA349966	GCA_002761255.1	Homo sapiens	localized adiposity	wound	daptomycin resistance
Enterococcus faecium	Bacteria;Terrabacteria group;Firmicutes	E243	SAMN05933400	PRJNA349966	GCA_002761275.1	Homo sapiens	localized adiposity	wound	daptomycin resistance
Enterococcus faecium	Bacteria;Terrabacteria group;Firmicutes	VRE001	SAMN06018903	PRJNA353653	GCA_001895905.1	Homo sapiens(USA)	Bacteremia	blood	VRE
Enterococcus faecium	Bacteria;Terrabacteria group;Firmicutes	E1	SAMN06019998	PRJNA353757	GCA_001886635.1	Homo sapiens	Bloodstream infection	blood	Pathogen
Enterococcus faecium	Bacteria;Terrabacteria group;Firmicutes	2014-VREF-41	SAMN06186500	PRJNA358851	GCA_002007625.1	Homo sapiens(South Korea)	Non-insulin-dependent diabets mellitus	Rectal swab	VRE
Enterococcus faecium	Bacteria;Terrabacteria group;Firmicutes	2014-VREF-268	SAMN06472830	PRJNA358851	GCA_002025045.1	Homo sapiens(South Korea)	Non-insulin-dependent diabets mellitus	Rectal swab	VRE
Enterococcus faecium	Bacteria;Terrabacteria group;Firmicutes	2014-VREF-63	SAMN06472829	PRJNA358851	GCA_002025065.1	Homo sapiens(South Korea)	Non-insulin-dependent diabets mellitus	Rectal swab	VRE
Enterococcus faecium	Bacteria;Terrabacteria group;Firmicutes	2014-VREF-114	SAMN06463381	PRJNA358851	GCA_002024245.1	Homo sapiens(South Korea)	Non-insulin-dependent diabets mellitus	Rectal swab	VRE
Enterococcus faecium	Bacteria;Terrabacteria group;Firmicutes	AALTL	SAMN06252387	PRJNA363045	GCA_002880635.1	human-associated habitat	not collected	not collected
Enterococcus faecium	Bacteria;Terrabacteria group;Firmicutes	16-346	SAMN07198401	PRJNA389415	GCA_002761555.1	Homo sapiens(France: Montbrison)	Fecal carriage	stool	Pathogen
Enterococcus faecium	Bacteria;Terrabacteria group;Firmicutes	WEFA23	SAMN07211315	PRJNA389942	GCA_002850515.1	Homo sapiens(China: Jiangxi)
Enterococcus faecium	Bacteria;Terrabacteria group;Firmicutes	K60-39	SAMN07638053	PRJNA407052	GCA_002334625.1	Homo sapiens	bacteremia	blood	resistance
Enterococcus faecium	Bacteria;Terrabacteria group;Firmicutes	Efaecium_ER04526.3A	SAMN07679732	PRJNA407447	GCA_002848745.1	not applicable	not applicable	not applicable	VRE
Enterococcus faecium	Bacteria;Terrabacteria group;Firmicutes	Efaecium_ER04619.3A	SAMN07679734	PRJNA407447	GCA_002848705.1	not applicable	not applicable	not applicable	VRE
Enterococcus faecium	Bacteria;Terrabacteria group;Firmicutes	Efaecium_ER04120.3A	SAMN07679729	PRJNA407447	GCA_002848645.1	not applicable	not applicable	not applicable	VRE
Enterococcus faecium	Bacteria;Terrabacteria group;Firmicutes	Efaecium_ER04484.3A	SAMN07679731	PRJNA407447	GCA_002848665.1	not applicable	not applicable	not applicable	VRE
Enterococcus faecium	Bacteria;Terrabacteria group;Firmicutes	Efaecium_ER04462.3A	SAMN07679730	PRJNA407447	GCA_002848685.1	not applicable	not applicable	not applicable	VRE
Enterococcus faecium	Bacteria;Terrabacteria group;Firmicutes	Efaecium_ER04526.5A	SAMN07679733	PRJNA407447	GCA_002848725.1	not applicable	not applicable	not applicable	VRE
Enterococcus faecium	Bacteria;Terrabacteria group;Firmicutes	Efaecium_ER03933.3A	SAMN07679728	PRJNA407447	GCA_002848625.1	not applicable	not applicable	not applicable	VRE
Enterococcus faecium	Bacteria;Terrabacteria group;Firmicutes	HY07	SAMN07945858	PRJNA416245	GCA_003574925.1	Chinese sausages(China:changsha)			bacteriocin-producing
Enterococcus faecium	Bacteria;Terrabacteria group;Firmicutes	LS170308	SAMN08102921	PRJNA419997	GCA_002831505.1	Moschus berezovskii	septicemia	Heart, liver and spleen	Pathogen
Enterococcus faecium	Bacteria;Terrabacteria group;Firmicutes	SC4	SAMN08174306	PRJNA422315	GCA_002848385.1	fodder(China)
Enterococcus faecium	Bacteria;Terrabacteria group;Firmicutes	CBA7134	SAMN08289536	PRJNA428410	GCA_004015145.1	Korean		adult feces
Enterococcus faecium	Bacteria;Terrabacteria group;Firmicutes	AUSMDU00004142	SAMN08628412	PRJNA433676	GCA_003020765.1	Homo sapiens(Australia)	VRE	blood	VRE
Enterococcus faecium	Bacteria;Terrabacteria group;Firmicutes	AUSMDU00004167	SAMN08628413	PRJNA433676	GCA_003020685.1	Homo sapiens(Australia)	VRE	not_blood	VRE
Enterococcus faecium	Bacteria;Terrabacteria group;Firmicutes	AUSMDU00004024	SAMN08628409	PRJNA433676	GCA_003020745.1	Homo sapiens(Australia)	VRE	blood	VRE
Enterococcus faecium	Bacteria;Terrabacteria group;Firmicutes	AUSMDU00004028	SAMN08628410	PRJNA433676	GCA_003020725.1	Homo sapiens(Australia)	VRE	blood	VRE
Enterococcus faecium	Bacteria;Terrabacteria group;Firmicutes	AUSMDU00004055	SAMN08628411	PRJNA433676	GCA_003020705.1	Homo sapiens(Australia)	VRE	not_blood	VRE
Enterococcus faecium	Bacteria;Terrabacteria group;Firmicutes	BM4105-RF	SAMN09464428	PRJNA477272	GCA_003269465.1	missing( France)	missing	missing
Enterococcus faecium	Bacteria;Terrabacteria group;Firmicutes	JE1	SAMN10237539	PRJNA496260	GCA_003667965.1	Biomedical source(China:Guangzhou)
Enterococcus faecium	Bacteria;Terrabacteria group;Firmicutes	RBWH1	SAMN10273305	PRJNA497960	GCA_003957785.1	Homo sapiens(Australia: Brisbane)	Urinary tract infection	urine	VRE
Enterococcus faecium	Bacteria;Terrabacteria group;Firmicutes	NM213	SAMN10697318	PRJNA513159	GCA_005166365.1	Homo sapiens(Egypt:Cairo)		infant feces	prospective probiotic
Enterococcus faecium	Bacteria;Terrabacteria group;Firmicutes	SRCM103341	SAMN10742281	PRJNA515111	GCA_004101385.1	food( South Korea)
Enterococcus faecium	Bacteria;Terrabacteria group;Firmicutes	SRCM103470	SAMN10754017	PRJNA515332	GCA_004103475.1	food( South Korea)
Enterococcus faecium	Bacteria;Terrabacteria group;Firmicutes	UAMSEF_09	SAMN10863492	PRJNA518133	GCA_005886715.1	Homo sapiens(USA:Arkansas)		patients	VRE
Enterococcus faecium	Bacteria;Terrabacteria group;Firmicutes	UAMSEF_20	SAMN10863493	PRJNA518133	GCA_005886735.1	Homo sapiens(USA:Arkansas)		patients	VRE
Enterococcus faecium	Bacteria;Terrabacteria group;Firmicutes	UAMSEF_08	SAMN10863491	PRJNA518133	GCA_005886655.1	Homo sapiens(USA:Arkansas)		patients	VRE
Enterococcus faecium	Bacteria;Terrabacteria group;Firmicutes	UAMSEF_01	SAMN10863479	PRJNA518133	GCA_005886545.1	Homo sapiens(USA:Arkansas)		patients	VRE
Enterococcus faecium	Bacteria;Terrabacteria group;Firmicutes	SRR24	SAMN10867607	PRJNA520784	GCA_009734005.2	Homo sapiens(China:Hangzhou)	uremia	hospital	VRE
Enterococcus faecium	Bacteria;Terrabacteria group;Firmicutes	ZY2	SAMN10867605	PRJNA520784	GCA_010120755.1	Homo sapiens(China:Hangzhou)	uremia	hospital	VRE
Enterococcus faecium	Bacteria;Terrabacteria group;Firmicutes	ZY11	SAMN11269520	PRJNA520784	GCA_009938075.1	Homo sapiens(China:Hangzhou)	uremia	hospital	VRE
Enterococcus faecium	Bacteria;Terrabacteria group;Firmicutes	VB3025	SAMN11490474	PRJNA534441	GCA_005517315.1	Homo sapiens(India)	Abscess	Pus	Pathogen
Enterococcus faecium	Bacteria;Terrabacteria group;Firmicutes	VB3240	SAMN11633508	PRJNA542561	GCA_005576735.1	Homo sapiens	Abscess	Pus	Pathogen
Enterococcus faecium	Bacteria;Terrabacteria group;Firmicutes	HOU503	SAMN11848047	PRJNA544687	GCA_005952885.1	Homo sapiens(USA: Houston)		liaR deleted isolate	antibiotic resistance
Enterococcus faecium	Bacteria;Terrabacteria group;Firmicutes	VRE1	SAMN11890391	PRJNA545358	GCA_006007925.1	Homo sapiens(China:Hangzhou)	urinary tract infection	urine	Pathogen
Enterococcus faecium	Bacteria;Terrabacteria group;Firmicutes	DB-1	SAMN11952093	PRJNA546098	GCA_006337045.1	Homo sapiens		feces
Enterococcus faecium	Bacteria;Terrabacteria group;Firmicutes	HB-1	SAMN11960005	PRJNA546487	GCA_006337145.1	Homo sapiens (South Korea)		feces
Enterococcus faecium	Bacteria;Terrabacteria group;Firmicutes	FB-1	SAMN11974796	PRJNA547677	GCA_006351785.1	Homo sapiens		feces
Enterococcus faecium	Bacteria;Terrabacteria group;Firmicutes	VVEswe-S	SAMN12138986	PRJNA551094	GCA_007917315.3	Homo sapiens	Liver failure	feces	Pathogen
Enterococcus faecium	Bacteria;Terrabacteria group;Firmicutes	VVEswe-R	SAMN12138936	PRJNA551094	GCA_007917035.3	Homo sapiens	Liver failure	feces	Pathogen
Enterococcus faecium	Bacteria;Terrabacteria group;Firmicutes	515	SAMN12141647	PRJNA551139	GCA_006575625.1	Homo sapiens(USA: Houston)	endocarditis	infection	antibiotic resistance
Enterococcus faecium	Bacteria;Terrabacteria group;Firmicutes	FA3	SAMN12530214	PRJNA559234	GCA_008000855.1	Homo sapiens ( South Korea)
Enterococcus faecium	Bacteria;Terrabacteria group;Firmicutes	DMEA02	SAMN12650248	PRJNA562786	GCA_008330605.1	Meju, fermented soybean (South Korea: Seosan)
Enterococcus faecium	Bacteria;Terrabacteria group;Firmicutes	DT1-1	SAMN12688234	PRJNA563811	GCA_011745645.1	beef cattle		feces
Enterococcus faecium	Bacteria;Terrabacteria group;Firmicutes	V2937	SAMN12818041	PRJNA573568	GCA_008728475.1	Homo sapiens(Denmark:Copenhagen)	Infection	Rectum	VRE
Enterococcus faecium	Bacteria;Terrabacteria group;Firmicutes	V1836	SAMN12818007	PRJNA573568	GCA_008728455.1	Homo sapiens(Denmark:Copenhagen)	Infection	Rectum	VRE
Enterococcus faecium	Bacteria;Terrabacteria group;Firmicutes	LAC7.2	SAMN12828129	PRJNA573875	GCA_009036045.1	Oreochromis niloticus( Brazil: Parana)		gut	probiotic
Enterococcus faecium	Bacteria;Terrabacteria group;Firmicutes	VRE	SAMN13283502	PRJNA589567	GCA_009697285.1	Homo sapiens(Canada)	BSI	missing	VRE
Enterococcus faecium	Bacteria;Terrabacteria group;Firmicutes	BIOPOP-3 ALE	SAMN14446140	PRJNA615057	GCA_012045365.1	Fermented dairy products(South Korea: Republic of, Seoul)
Enterococcus faecium	Bacteria;Terrabacteria group;Firmicutes	BIOPOP-3 WT	SAMN14446138	PRJNA615057	GCA_012045505.1	Fermented dairy products(South Korea: Republic of, Seoul)
Enterococcus faecium	Bacteria;Terrabacteria group;Firmicutes	FS 86	SAMN14969421	PRJNA633747	GCA_013201055.1	Homo sapiens(Russia: Pushchino)			probiotic
Enterococcus faecium ATCC 8459 = NRRL B-2354	Bacteria;Terrabacteria group;Firmicutes	NRRL B-2354	SAMN02604149	PRJNA74725	GCA_000336405.1	milk and dairy utensils			probiotic
