# Supplementary material for: Enterococcus faecium Regulates Honey Bee Developmental Genes
Source: Int J Mol Sci. 2021 Nov 9;22(22):12105. doi: 10.3390/ijms222212105 (PMC8621553; doi:10.3390/ijms222212105)
Supplement: Supplementary file 1 [file ijms-22-12105-s001.zip › TableS2_bacteria_genome_annotation.xlsx]

## Sheet: statistic
	CDS number	COG_number(%)	KEGG_number(%)	GO_number(%)
E. faecium H7	2509	2067(82.38%)	1370(54.60%)	1572(62.65%)

## Sheet: H7_COG
Query_id	Subject_id	%_identity	alignment_length	mismatches	gap_openings	q. start	q. end	s. start	s. end	e-value	bit_score
tig00001_1	CDD:223666	46.789	436	201	8	8	440	1	408	5.24e-178	501
tig00001_1	CDD:224401	23.529	170	114	6	103	261	65	229	1.03e-13	67.8
tig00001_1	CDD:224402	22.835	127	58	7	144	250	68	174	8.22e-07	47.7
tig00001_1	CDD:224383	16.279	172	114	6	215	359	71	239	0.001	37.7
tig00001_2	CDD:223665	31.649	376	244	6	1	375	1	364	3.71e-99	296
tig00001_3	CDD:225303	53.968	63	29	0	25	87	3	65	2.31e-27	92.7
tig00001_4	CDD:224116	47.581	372	184	5	1	370	1	363	2.95e-156	441
tig00001_4	CDD:224031	30	60	42	0	6	65	5	64	1.22e-07	49.8
tig00001_4	CDD:226121	36.957	46	29	0	1	46	1	46	2.62e-06	46.2
tig00001_4	CDD:226459	40.909	44	25	1	1	43	1	44	4.48e-05	42.2
tig00001_4	CDD:226984	31.915	47	31	1	1	47	1	46	0.000235	39.8
tig00001_4	CDD:223496	17.978	267	179	10	1	254	1	240	0.004	36.3
tig00001_5	CDD:223265	64.163	639	218	6	13	648	5	635	0	1057
tig00001_5	CDD:223400	40.476	42	19	3	50	89	30	67	3.01e-07	50.4
tig00001_5	CDD:223715	22.642	53	35	2	44	93	229	278	0.008	35.9
tig00001_6	CDD:223266	59.433	811	317	5	3	810	2	803	0	1170
tig00001_6	CDD:226204	23.009	113	58	4	386	471	5	115	0.000792	37.3
tig00001_6	CDD:224117	20	155	107	3	343	484	289	439	0.006	37
tig00001_7	CDD:223437	41.053	95	54	1	5	99	2	94	1.22e-36	117
tig00001_8	CDD:223702	42.373	177	84	5	1	170	2	167	3.65e-47	148
tig00001_9	CDD:223316	69.492	59	18	0	14	72	17	75	4.84e-30	98.5
tig00001_11	CDD:226404	44.681	658	352	9	3	653	2	654	0	631
tig00001_11	CDD:223691	25.994	327	211	11	340	654	21	328	2.63e-27	110
tig00001_11	CDD:224148	21.111	180	124	9	338	516	4	166	1.04e-05	45
tig00001_12	CDD:223436	56.667	150	62	2	1	150	1	147	1.3e-47	148
tig00001_13	CDD:223382	51.685	445	202	5	8	450	1	434	0	566
tig00001_13	CDD:223543	29.851	67	45	2	186	251	5	70	0.000141	40.5
tig00001_14	CDD:223182	63.256	430	156	1	1	428	1	430	0	759
tig00001_15	CDD:224226	36.918	279	169	4	4	281	5	277	1.36e-66	206
tig00001_16	CDD:223562	40.782	537	304	8	1	532	3	530	0	656
tig00001_16	CDD:224046	30.342	234	112	10	1	218	4	202	2.39e-38	138
tig00001_16	CDD:224046	21.973	223	124	8	319	507	4	210	3.27e-20	87.3
tig00001_16	CDD:224045	27.823	248	129	7	1	230	2	217	9.84e-38	136
tig00001_16	CDD:224045	24.268	239	131	7	319	522	2	225	1.65e-19	85.3
tig00001_16	CDD:224054	25.168	298	163	8	1	271	4	268	5.66e-36	133
tig00001_16	CDD:224054	23.932	234	154	8	319	533	4	232	2.1e-20	88.9
tig00001_16	CDD:224047	29.555	247	125	8	1	230	3	217	4.94e-30	115
tig00001_16	CDD:224047	23.605	233	155	8	319	531	3	232	1.07e-15	73.8
tig00001_16	CDD:226927	27.16	243	143	9	1	236	1	216	2.21e-28	110
tig00001_16	CDD:226927	22.917	192	124	4	335	507	18	204	3.14e-09	54.7
tig00001_16	CDD:224041	25.792	221	121	7	1	211	3	190	3.53e-26	104
tig00001_16	CDD:224041	25.11	227	137	11	319	523	3	218	9.82e-12	62.2
tig00001_16	CDD:226929	29.185	233	110	8	1	211	1	200	1.45e-25	102
tig00001_16	CDD:226929	25.21	238	146	7	319	527	1	235	8.53e-14	68.5
tig00001_16	CDD:223488	26.016	246	145	6	1	230	4	228	1.65e-25	102
tig00001_16	CDD:223488	25.2	250	144	11	319	533	4	245	1.64e-10	58.7
tig00001_16	CDD:224043	24.231	260	148	9	1	243	2	229	2.55e-25	104
tig00001_16	CDD:224043	21.667	240	134	7	320	523	3	224	3.91e-09	55.4
tig00001_16	CDD:226952	27.53	247	139	12	10	243	28	247	1.26e-24	101
tig00001_16	CDD:226952	24.215	223	141	7	337	538	42	257	3.42e-15	73.6
tig00001_16	CDD:224166	24.457	552	281	31	25	531	98	558	7.04e-24	102
tig00001_16	CDD:224166	27.536	207	101	11	14	211	349	515	8.94e-12	64.6
tig00001_16	CDD:224048	21.918	584	327	28	1	525	5	518	7.16e-24	102
tig00001_16	CDD:224052	28.685	251	124	8	1	230	8	224	1.12e-23	97.7
tig00001_16	CDD:224052	24.4	250	132	11	319	530	8	238	1.19e-11	62.2
tig00001_16	CDD:224049	22.857	245	147	6	1	230	3	220	1.18e-23	97.3
tig00001_16	CDD:224049	22.822	241	119	9	319	515	3	220	3.61e-12	63.4
tig00001_16	CDD:225183	25	272	148	11	2	253	472	707	6.48e-23	99
tig00001_16	CDD:225183	23.77	244	131	10	320	527	472	696	7.57e-14	71.1
tig00001_16	CDD:224053	19.692	584	320	19	1	529	8	497	1.56e-22	98
tig00001_16	CDD:224051	25.506	247	133	7	1	230	2	214	2.22e-22	93.3
tig00001_16	CDD:224051	26.923	104	47	7	440	528	137	226	0.000129	40.6
tig00001_16	CDD:224059	26.496	234	117	7	1	211	1	202	8.24e-22	91.4
tig00001_16	CDD:224059	20.982	224	139	8	319	511	1	217	1.26e-07	49.8
tig00001_16	CDD:224058	25.692	253	132	9	1	230	1	220	1.33e-21	93.1
tig00001_16	CDD:224058	27.368	95	63	4	436	526	139	231	0.00026	40.3
tig00001_16	CDD:226631	22.642	318	196	9	1	297	2	290	1.66e-21	92
tig00001_16	CDD:226631	24.378	201	135	6	320	506	3	200	9.33e-12	63.1
tig00001_16	CDD:224044	25.41	244	145	6	1	230	31	251	1.91e-21	90.8
tig00001_16	CDD:224044	22.131	244	139	8	310	515	22	252	2.42e-11	61.2
tig00001_16	CDD:226359	25	244	135	9	1	230	3	212	6.45e-21	91.2
tig00001_16	CDD:226359	18.876	249	141	8	320	531	4	228	7.23e-08	51.5
tig00001_16	CDD:227321	24.893	233	117	8	2	213	321	516	8.46e-21	92.7
tig00001_16	CDD:227321	26.05	238	133	10	320	528	321	544	1.9e-17	82.3
tig00001_16	CDD:224057	21.457	247	138	9	1	233	24	228	9.65e-21	88.8
tig00001_16	CDD:224057	24.873	197	120	7	334	515	42	225	5.99e-13	65.7
tig00001_16	CDD:226164	24.206	252	141	7	1	230	3	226	1.73e-20	88.1
tig00001_16	CDD:226164	17.672	232	139	6	320	511	4	223	2.29e-12	64.2
tig00001_16	CDD:226364	22.242	562	294	27	18	524	21	494	8.2e-20	89.5
tig00001_16	CDD:226364	23.14	242	145	12	318	527	3	235	0.002	37.5
tig00001_16	CDD:225438	22.892	249	139	9	1	230	1	215	1.08e-18	82.3
tig00001_16	CDD:225438	23.077	221	148	8	319	519	1	219	9.41e-10	56.1
tig00001_16	CDD:226963	27.888	251	123	10	1	230	1	214	2e-18	82
tig00001_16	CDD:226963	22.078	231	130	10	319	515	1	215	7.7e-06	44.6
tig00001_16	CDD:224055	22.814	263	158	10	2	250	329	560	2.85e-18	84.8
tig00001_16	CDD:224055	24.701	251	159	12	313	540	322	565	7.37e-16	77.5
tig00001_16	CDD:227019	24.219	256	147	8	2	239	6	232	2.08e-17	78.9
tig00001_16	CDD:227019	22.407	241	155	8	319	532	5	240	5.95e-09	53.9
tig00001_16	CDD:227320	21.923	260	139	13	2	237	337	556	2.12e-17	82.4
tig00001_16	CDD:227320	24.59	244	157	9	317	538	334	572	7.49e-12	64.7
tig00001_16	CDD:226905	24.444	225	125	7	1	213	3	194	2.25e-17	79
tig00001_16	CDD:226905	23.832	214	130	8	320	510	4	207	0.000558	39
tig00001_16	CDD:226641	20.534	599	318	26	1	528	6	517	5.54e-17	80.8
tig00001_16	CDD:226641	31.068	103	64	4	440	536	158	259	7.05e-06	45.7
tig00001_16	CDD:224050	26.122	245	135	7	1	230	1	214	6.57e-17	78.5
tig00001_16	CDD:224050	24.37	238	140	9	319	528	1	226	1.95e-08	53.1
tig00001_16	CDD:226967	20.576	243	122	4	1	230	4	188	7.8e-17	77.6
tig00001_16	CDD:226967	21.397	229	129	10	319	528	4	200	1.61e-07	49.9
tig00001_16	CDD:226647	25.106	235	118	8	2	212	7	207	3.67e-16	74.7
tig00001_16	CDD:226361	24.59	244	137	7	1	230	5	215	1.95e-15	74.6
tig00001_16	CDD:226361	21.645	231	145	8	315	520	1	220	1.09e-05	44.6
tig00001_16	CDD:223521	20.992	262	145	8	1	230	1	232	5.76e-15	73
tig00001_16	CDD:223521	22.619	252	145	13	319	528	1	244	5.87e-06	45.3
tig00001_16	CDD:223487	24.747	198	104	6	1	186	3	167	5.89e-15	71.7
tig00001_16	CDD:223487	25.294	170	98	9	319	467	3	164	9.43e-08	50.2
tig00001_16	CDD:226646	24.167	240	128	10	1	226	392	591	6.36e-15	74.7
tig00001_16	CDD:226646	20.576	243	157	9	289	513	366	590	8.38e-09	55
tig00001_16	CDD:224042	25.424	236	112	10	2	210	8	206	6.37e-15	71.8
tig00001_16	CDD:226970	21.983	232	130	9	1	214	3	201	1.04e-14	70.7
tig00001_16	CDD:226970	20.179	223	158	4	319	524	3	222	2.41e-14	69.5
tig00001_16	CDD:226592	23.684	228	135	6	1	211	6	211	2.44e-14	70.2
tig00001_16	CDD:226592	24.017	229	141	8	319	516	6	232	1.98e-06	46.3
tig00001_16	CDD:226961	24.219	256	135	4	2	230	7	230	2.93e-14	69.8
tig00001_16	CDD:224026	24.658	219	120	10	33	236	38	226	3.32e-14	70
tig00001_16	CDD:224026	22.941	170	105	6	326	471	13	180	1.32e-06	46.9
tig00001_16	CDD:227118	26.131	199	117	6	1	187	4	184	2.7e-13	66.7
tig00001_16	CDD:227118	27.397	73	50	1	441	510	154	226	0.007	35.5
tig00001_16	CDD:226635	21.795	234	161	5	2	230	3	219	5.64e-13	66
tig00001_16	CDD:226635	27.381	84	56	3	440	519	142	224	0.009	35.2
tig00001_16	CDD:226360	23.596	267	149	9	1	251	1	228	6.42e-13	65.5
tig00001_16	CDD:226360	21.145	227	142	9	335	531	4	223	5.99e-05	41.6
tig00001_16	CDD:224060	28.095	210	115	9	11	210	14	197	8.8e-13	65.3
tig00001_16	CDD:224060	22.727	242	147	11	320	533	5	234	1.96e-08	52.2
tig00001_16	CDD:226617	22.488	209	114	8	1	198	2	173	1.2e-12	64.2
tig00001_16	CDD:226617	26.667	195	118	7	319	495	2	189	3.14e-10	57.3
tig00001_16	CDD:226620	23.423	222	130	6	1	211	2	194	1.65e-12	64.1
tig00001_16	CDD:226620	20.93	215	114	8	319	497	2	196	2.48e-06	45.6
tig00001_16	CDD:223473	20.084	239	139	9	1	218	3	210	2.37e-12	64.1
tig00001_16	CDD:223473	21.344	253	153	13	319	531	3	249	2.04e-07	49.5
tig00001_16	CDD:226643	22.326	215	111	7	18	211	45	224	5.24e-09	55.1
tig00001_16	CDD:226969	28.372	215	93	14	19	210	354	530	7.95e-09	55
tig00001_16	CDD:225265	22.843	197	131	7	334	515	398	588	8.01e-09	55.2
tig00001_16	CDD:225265	24.651	215	112	6	14	216	396	572	8.19e-06	45.6
tig00001_16	CDD:226639	24.348	230	127	9	15	220	21	227	1.17e-08	53.7
tig00001_16	CDD:227590	23.982	221	129	12	2	210	263	456	1.84e-08	53.9
tig00001_16	CDD:227590	24.483	290	165	15	272	528	219	487	2.25e-07	50.4
tig00001_16	CDD:226622	22.979	235	128	13	1	221	3	198	2.29e-08	52.2
tig00001_16	CDD:226622	24	200	118	9	319	495	3	191	9.53e-05	41
tig00001_16	CDD:226628	19.913	231	129	8	19	231	16	208	3.61e-08	52.3
tig00001_16	CDD:226628	30.38	79	51	1	440	514	129	207	4.3e-05	42.7
tig00001_16	CDD:226637	20.346	231	155	8	319	520	4	234	1.43e-05	43.7
tig00001_16	CDD:226637	21.074	242	146	10	1	224	4	218	5.21e-05	42.1
tig00001_16	CDD:226968	21.569	204	117	6	20	214	342	511	1.74e-05	44.4
tig00001_16	CDD:223256	34.831	89	35	6	151	225	818	897	0.000222	41
tig00001_16	CDD:223496	27.027	74	43	3	154	216	814	887	0.000674	39.4
tig00001_16	CDD:223496	25.397	126	75	4	401	507	769	894	0.004	37
tig00001_16	CDD:224025	21.374	131	92	5	31	156	9	133	0.006	35.3
tig00001_17	CDD:225786	35.152	165	103	2	9	173	20	180	1.05e-10	54.9
tig00001_17	CDD:225786	27.523	109	77	1	9	117	76	182	3.51e-05	39.5
tig00001_18	CDD:223107	35.424	542	338	7	3	537	1	537	1.15e-179	515
tig00001_18	CDD:226469	26.011	569	364	14	1	528	1	553	4.8e-60	207
tig00001_18	CDD:226471	24.747	594	384	16	19	563	31	610	1.78e-46	169
tig00001_18	CDD:226470	22.569	576	374	28	1	541	1	539	5.38e-28	115
tig00001_18	CDD:224792	25.833	120	73	6	168	276	3	117	0.003	35.9
tig00001_19	CDD:223505	42.642	265	137	6	14	272	10	265	4.17e-58	183
tig00001_21	CDD:226078	37.037	189	117	2	1	188	10	197	1.04e-40	133
tig00001_23	CDD:227108	35.115	131	81	2	34	160	65	195	1.66e-07	46.2
tig00001_24	CDD:224208	18.987	158	125	2	169	324	341	497	2.56e-06	45.9
tig00001_29	CDD:225865	34.447	389	241	9	5	392	1	376	3.36e-96	289
tig00001_31	CDD:223710	28.5	200	133	7	1	198	2	193	9.4e-35	120
tig00001_31	CDD:223620	25	188	136	3	1	188	4	186	6.79e-24	92.5
tig00001_31	CDD:223943	21.106	199	140	7	1	188	4	196	1.87e-10	56.1
tig00001_31	CDD:223720	19.913	231	136	13	1	188	8	232	8.24e-05	39.5
tig00001_31	CDD:225090	21.905	105	70	3	85	188	42	135	0.002	35
tig00001_32	CDD:224268	37.255	255	156	3	1	253	1	253	5.09e-91	266
tig00001_32	CDD:225253	36.17	47	30	0	1	47	4	50	1.83e-05	42
tig00001_32	CDD:225099	46.875	32	17	0	23	54	35	66	2.24e-05	41.5
tig00001_32	CDD:224355	39.583	48	24	1	1	43	2	49	0.000336	37.2
tig00001_32	CDD:225222	40.909	44	25	1	10	53	16	58	0.000378	37.7
tig00001_32	CDD:225718	42.553	47	27	0	15	61	300	346	0.002	36.3
tig00001_32	CDD:226234	22.353	85	63	1	1	82	1	85	0.007	34.3
tig00001_33	CDD:225343	42.017	476	246	10	1	466	1	456	1.81e-178	504
tig00001_34	CDD:224364	41	100	59	0	2	101	1	100	3.08e-34	111
tig00001_35	CDD:224372	37.788	434	257	7	1	426	1	429	2.31e-139	407
tig00001_35	CDD:224357	27.723	101	65	4	457	554	3	98	7.46e-07	44.9
tig00001_36	CDD:226385	51.743	373	168	7	25	393	30	394	1.6e-148	429
tig00001_36	CDD:223107	27.551	98	46	5	65	144	459	549	0.002	37.6
tig00001_37	CDD:223593	68.966	319	95	1	203	521	1	315	0	623
tig00001_37	CDD:223592	44	200	103	6	10	202	1	198	3.93e-81	248
tig00001_37	CDD:223586	34.395	157	91	6	44	193	36	187	6.47e-17	76.1
tig00001_37	CDD:223579	28.889	180	81	10	12	165	181	339	3.04e-14	71.1
tig00001_37	CDD:223115	20.942	191	121	9	215	390	12	187	4.22e-08	51.8
tig00001_37	CDD:223249	25.114	219	106	11	210	401	9	196	7.78e-08	50.7
tig00001_37	CDD:224982	23.936	188	101	9	30	179	35	218	2.77e-07	48.9
tig00001_37	CDD:223558	26.042	192	110	10	222	390	2	184	1.59e-06	47.2
tig00001_37	CDD:224522	25.439	228	126	12	214	429	7	202	3.66e-06	45.4
tig00001_37	CDD:223253	26.316	76	53	3	217	292	34	106	0.000708	38.6
tig00001_38	CDD:223998	49.117	283	143	1	2	284	1	282	8.89e-126	358
tig00001_38	CDD:223645	23.982	221	135	10	81	299	6	195	2.18e-16	73.9
tig00001_38	CDD:226691	24.793	121	83	4	83	195	50	170	4.48e-10	56.4
tig00001_38	CDD:223841	38.235	34	19	1	80	113	100	131	0.001	36.9
tig00001_38	CDD:224337	30.435	46	32	0	79	124	199	244	0.007	34.6
tig00001_39	CDD:225370	40.976	205	109	5	1	200	102	299	4.25e-78	233
tig00001_39	CDD:225443	31.507	146	83	6	4	135	43	185	3.76e-19	80.1
tig00001_39	CDD:226608	27.397	146	75	7	47	164	28	170	1.64e-13	64.2
tig00001_39	CDD:225174	31.429	105	58	5	52	147	285	384	8.33e-09	51.5
tig00001_39	CDD:225173	33	100	60	4	63	160	165	259	2.21e-08	50
tig00001_39	CDD:225151	27.358	106	70	3	57	160	31	131	3.21e-07	45.7
tig00001_39	CDD:225318	28.283	99	64	2	64	160	192	285	2.58e-05	40.8
tig00001_39	CDD:225172	21.622	111	69	5	28	135	22	117	7.13e-05	39.2
tig00001_39	CDD:223574	20.833	120	88	3	49	163	37	154	0.000154	38.3
tig00001_39	CDD:225137	21.951	82	58	5	55	133	53	131	0.001	35.8
tig00001_39	CDD:224017	23.729	118	70	8	61	160	217	332	0.001	36.1
tig00001_39	CDD:223813	22.603	146	87	10	61	193	43	175	0.003	34.1
tig00001_40	CDD:224525	36.228	334	208	3	4	335	2	332	2.47e-111	324
tig00001_40	CDD:224791	25.166	302	174	15	62	333	34	313	6.3e-24	97.2
tig00001_41	CDD:223291	60.369	434	170	2	1	432	2	435	0	620
tig00001_41	CDD:223621	26.163	172	120	4	1	169	2	169	1.91e-09	55.7
tig00001_42	CDD:223351	64.186	215	76	1	1	214	6	220	1.56e-111	316
tig00001_42	CDD:223245	22.632	190	110	8	59	212	93	281	2.76e-06	44.1
tig00001_42	CDD:224743	26.846	149	76	7	79	211	105	236	0.000711	36.9
tig00001_42	CDD:223576	34.524	84	37	3	130	203	83	158	0.003	34.9
tig00001_42	CDD:223429	25.455	110	62	5	98	207	43	132	0.003	34.5
tig00001_42	CDD:225555	27.632	76	44	3	143	215	143	210	0.007	33.4
tig00001_43	CDD:223372	56.198	121	53	0	12	132	12	132	9.13e-64	187
tig00001_44	CDD:224658	39.56	364	191	6	1	359	1	340	1.73e-92	277
tig00001_44	CDD:224791	23.656	279	172	12	1	266	3	253	5.62e-08	50.9
tig00001_45	CDD:226364	60.241	498	196	2	7	502	4	501	0	792
tig00001_45	CDD:224053	41.7	506	285	5	1	503	2	500	0	533
tig00001_45	CDD:224048	27.788	529	306	22	7	483	5	509	1.73e-58	200
tig00001_45	CDD:224048	29.167	240	144	9	1	220	274	507	4.87e-31	123
tig00001_45	CDD:224048	29.218	243	149	9	255	483	1	234	1.01e-22	98.4
tig00001_45	CDD:224054	32.155	283	179	5	4	278	1	278	2.06e-48	166
tig00001_45	CDD:224054	30.043	233	149	7	259	490	4	223	6.58e-35	129
tig00001_45	CDD:223488	33.48	227	141	3	6	222	3	229	1.55e-47	162
tig00001_45	CDD:223488	29.249	253	152	8	257	495	2	241	4.72e-29	112
tig00001_45	CDD:226641	27.087	539	301	25	3	483	2	506	1.92e-43	158
tig00001_45	CDD:224051	37.089	213	132	1	8	220	3	213	8.64e-43	149
tig00001_45	CDD:224051	29.752	242	137	8	260	490	3	222	7.17e-18	80.2
tig00001_45	CDD:224041	32.883	222	129	5	7	222	3	210	1.18e-42	149
tig00001_45	CDD:224041	28.09	267	153	11	258	512	2	241	2.24e-18	81.8
tig00001_45	CDD:224059	34.081	223	134	6	7	220	1	219	2.36e-41	145
tig00001_45	CDD:224059	26.84	231	151	7	259	482	1	220	2.28e-18	81.4
tig00001_45	CDD:224047	33.945	218	136	5	7	220	3	216	1.25e-40	143
tig00001_45	CDD:224047	26.531	245	163	5	259	499	3	234	5.89e-27	106
tig00001_45	CDD:224058	33.898	236	137	6	7	230	1	229	4.19e-39	142
tig00001_45	CDD:224058	25.333	225	138	7	270	483	16	221	1.39e-18	84.2
tig00001_45	CDD:224046	32.301	226	145	4	5	226	2	223	1.45e-38	138
tig00001_45	CDD:224046	27.236	246	150	8	259	495	4	229	7.29e-26	103
tig00001_45	CDD:224052	33.333	231	134	8	1	220	2	223	2.71e-38	138
tig00001_45	CDD:224052	26.087	253	156	11	255	495	4	237	2.47e-26	104
tig00001_45	CDD:224043	32.71	214	142	2	8	220	3	215	1.3e-36	135
tig00001_45	CDD:224043	25.217	230	158	5	264	490	6	224	2.76e-24	100
tig00001_45	CDD:226361	33.032	221	140	4	7	224	5	220	1.35e-35	133
tig00001_45	CDD:226361	30.472	233	147	6	259	490	5	223	1.44e-18	84.3
tig00001_45	CDD:226927	29.767	215	145	5	7	220	1	210	4.08e-35	129
tig00001_45	CDD:226927	26.316	209	141	6	275	483	17	212	1.94e-23	96.3
tig00001_45	CDD:226359	32.71	214	137	3	8	220	4	211	1.23e-34	130
tig00001_45	CDD:226359	26.582	237	148	8	260	490	4	220	4.49e-16	76.5
tig00001_45	CDD:224045	29.185	233	161	4	8	237	3	234	5.57e-34	126
tig00001_45	CDD:224045	25.926	243	158	9	260	494	3	231	6.21e-25	101
tig00001_45	CDD:226643	33.953	215	129	5	13	220	34	242	1.05e-33	128
tig00001_45	CDD:226643	27.948	229	132	8	275	490	43	251	1.04e-17	82
tig00001_45	CDD:226631	29.204	226	152	3	8	233	3	220	1.23e-33	126
tig00001_45	CDD:226631	25.238	210	139	5	275	483	17	209	3.51e-20	88.2
tig00001_45	CDD:224050	35.185	216	133	5	8	220	2	213	1.18e-32	123
tig00001_45	CDD:224050	29.63	243	137	9	260	490	2	222	1.09e-16	78.1
tig00001_45	CDD:226164	32.301	226	138	7	7	220	3	225	2.22e-32	121
tig00001_45	CDD:226164	25.391	256	159	8	257	496	1	240	2.17e-17	79.2
tig00001_45	CDD:226635	31.963	219	140	3	8	220	3	218	6.56e-32	120
tig00001_45	CDD:226635	24.537	216	146	6	274	483	16	220	8.71e-09	53.3
tig00001_45	CDD:227019	28.444	225	148	5	4	219	2	222	9.62e-32	119
tig00001_45	CDD:227019	22.368	228	165	7	259	482	5	224	1.42e-11	61.6
tig00001_45	CDD:225438	30	220	142	4	7	220	1	214	4.35e-31	117
tig00001_45	CDD:225438	27.222	180	118	5	259	436	1	169	4.25e-14	68.8
tig00001_45	CDD:226961	30.303	231	135	5	8	220	7	229	1.13e-30	117
tig00001_45	CDD:226961	26.275	255	155	9	257	494	4	242	3.07e-14	69.8
tig00001_45	CDD:224049	30.131	229	131	8	8	220	4	219	1.45e-30	116
tig00001_45	CDD:224049	31.489	235	133	6	260	483	4	221	4.5e-25	101
tig00001_45	CDD:227321	29.918	244	145	9	3	234	316	545	6.8e-30	120
tig00001_45	CDD:227321	26.721	247	169	6	250	495	310	545	2.82e-23	100
tig00001_45	CDD:226360	27.511	229	155	5	8	234	2	221	1.56e-29	113
tig00001_45	CDD:226360	24.88	209	136	8	279	483	18	209	1.37e-09	55.4
tig00001_45	CDD:223562	20.251	558	315	15	6	480	2	512	2.4e-29	118
tig00001_45	CDD:223562	26.415	212	129	9	5	213	319	506	2.97e-20	90.8
tig00001_45	CDD:223562	20.968	248	152	11	259	483	3	229	1.93e-09	56.9
tig00001_45	CDD:223521	31.174	247	141	11	7	230	1	241	3.8e-29	114
tig00001_45	CDD:223521	29.455	275	161	11	259	510	1	265	4.89e-24	99.6
tig00001_45	CDD:224057	28.07	228	140	6	15	238	35	242	5.84e-29	111
tig00001_45	CDD:224057	27.313	227	121	9	274	490	41	233	2.16e-15	73
tig00001_45	CDD:226647	32.127	221	134	8	1	213	1	213	4.09e-28	109
tig00001_45	CDD:226647	28.649	185	121	4	255	436	2	178	1.73e-15	72.8
tig00001_45	CDD:226929	28.226	248	162	5	8	242	2	246	3.67e-27	107
tig00001_45	CDD:226929	22.441	254	148	11	260	491	2	228	3.26e-10	57.8
tig00001_45	CDD:223487	29.339	242	150	5	5	239	1	228	2.41e-26	104
tig00001_45	CDD:223487	28.571	252	143	8	257	495	1	228	1.79e-25	101
tig00001_45	CDD:224060	30.317	221	143	5	5	220	2	216	6.32e-26	103
tig00001_45	CDD:224060	28.631	241	158	7	258	496	3	231	1.12e-19	85.3
tig00001_45	CDD:225183	25.847	236	158	8	8	237	472	696	2.57e-25	106
tig00001_45	CDD:225183	26.891	238	137	10	260	483	472	686	3.23e-17	81.9
tig00001_45	CDD:224055	32.02	203	124	7	24	220	346	540	7.31e-24	102
tig00001_45	CDD:224055	27.155	232	143	8	260	483	329	542	1.44e-17	82.5
tig00001_45	CDD:226963	30.233	215	145	4	8	220	2	213	1.43e-23	97
tig00001_45	CDD:226963	24.67	227	151	9	262	483	4	215	5.16e-07	48.1
tig00001_45	CDD:224044	25	228	153	7	8	223	32	253	2.32e-23	96.6
tig00001_45	CDD:224044	26.971	241	161	5	250	484	22	253	1.8e-20	88.1
tig00001_45	CDD:223473	30.144	209	127	7	24	220	21	222	4.22e-23	95.3
tig00001_45	CDD:223473	26.316	247	149	7	257	488	1	229	1.19e-16	76.8
tig00001_45	CDD:226967	25.328	229	115	5	5	220	2	187	1.1e-22	94.6
tig00001_45	CDD:226967	25.61	246	122	7	256	490	1	196	1.68e-18	82.6
tig00001_45	CDD:226905	31.683	202	120	9	25	221	23	211	1.55e-22	94.1
tig00001_45	CDD:226905	23.585	212	140	6	269	477	14	206	2.89e-14	69.8
tig00001_45	CDD:227320	25.551	227	151	8	5	222	334	551	1.82e-22	97.8
tig00001_45	CDD:227320	23.361	244	168	8	257	495	334	563	1.13e-17	83.1
tig00001_45	CDD:226628	28.638	213	137	4	12	220	5	206	1.67e-21	92.8
tig00001_45	CDD:226628	24.766	214	130	10	279	483	17	208	2.52e-10	58.9
tig00001_45	CDD:226970	26.126	222	154	7	6	225	2	215	1.78e-21	90.3
tig00001_45	CDD:226970	24.883	213	135	8	276	482	19	212	1.14e-15	73.4
tig00001_45	CDD:224042	25.974	231	134	11	3	212	3	217	1.03e-19	85.7
tig00001_45	CDD:224042	23.482	247	147	11	256	483	4	227	3.77e-12	63.3
tig00001_45	CDD:224026	27.309	249	156	8	8	240	2	241	1.76e-19	85.5
tig00001_45	CDD:224026	26.087	230	161	6	260	483	2	228	8.58e-17	77.4
tig00001_45	CDD:226952	26.291	213	132	5	19	220	36	234	2.37e-19	86.3
tig00001_45	CDD:226952	25.751	233	142	8	261	483	25	236	5.61e-18	82
tig00001_45	CDD:226637	27.53	247	159	7	7	238	4	245	1.76e-18	82.6
tig00001_45	CDD:226637	22.018	218	147	4	274	483	27	229	7.65e-09	53.7
tig00001_45	CDD:226592	25.664	226	158	4	7	222	6	231	4.64e-18	81
tig00001_45	CDD:226592	24.8	250	149	10	259	487	6	237	3.51e-10	57.8
tig00001_45	CDD:226620	24.737	190	128	6	25	208	20	200	4.08e-17	77.2
tig00001_45	CDD:224166	23.529	510	258	26	30	481	97	532	1.12e-16	80
tig00001_45	CDD:224166	25.112	223	127	8	2	215	337	528	2.28e-15	75.8
tig00001_45	CDD:226968	31.5	200	116	7	26	220	342	525	1.16e-16	79.8
tig00001_45	CDD:226968	35.294	51	33	0	279	329	342	392	1.81e-06	47.5
tig00001_45	CDD:226617	26.633	199	126	5	9	201	4	188	2.21e-15	72.3
tig00001_45	CDD:226617	25.405	185	115	8	260	441	3	167	4.13e-11	59.6
tig00001_45	CDD:226969	25.871	201	136	7	25	219	354	547	1.88e-14	72.7
tig00001_45	CDD:226969	27.5	240	143	10	254	482	330	549	1.95e-14	72.7
tig00001_45	CDD:227118	26.872	227	140	7	5	212	2	221	4.41e-14	69
tig00001_45	CDD:227118	25.592	211	136	9	273	474	24	222	2.91e-09	54.7
tig00001_45	CDD:227590	28.169	213	117	11	25	220	281	474	8.92e-14	70.5
tig00001_45	CDD:227590	25.806	217	133	10	276	483	279	476	2.66e-07	50
tig00001_45	CDD:226622	24.498	249	145	8	26	255	18	242	5.65e-13	66
tig00001_45	CDD:226622	22.018	218	133	7	279	483	18	211	1.52e-08	52.5
tig00001_45	CDD:226639	23.293	249	165	9	7	232	3	248	7.27e-10	57.5
tig00001_45	CDD:226639	23.673	245	158	9	259	483	3	238	1.69e-07	50.2
tig00001_45	CDD:223256	26.341	205	120	11	144	333	482	670	1.59e-08	54.1
tig00001_45	CDD:223256	40	65	35	2	150	211	829	892	1.16e-06	48.3
tig00001_45	CDD:225265	23.661	224	132	7	4	210	374	575	6.93e-08	52.2
tig00001_45	CDD:225265	18.987	237	165	8	252	483	374	588	0.009	35.6
tig00001_45	CDD:226425	23.837	172	92	6	40	201	44	186	9.91e-07	47
tig00001_45	CDD:226646	25	184	111	7	24	201	410	572	0.000199	40.8
tig00001_45	CDD:226646	42	50	29	0	260	309	393	442	0.004	36.9
tig00001_45	CDD:223496	36	50	31	1	163	212	843	891	0.000206	40.9
tig00001_46	CDD:226962	42.771	332	185	2	23	354	27	353	7.85e-89	269
tig00001_46	CDD:224005	23.81	294	208	6	54	344	11	291	3.63e-18	81.1
tig00001_46	CDD:224093	21.824	307	183	8	50	337	34	302	3.66e-08	51.4
tig00001_46	CDD:223633	25	136	100	1	201	336	151	284	0.000353	39.1
tig00001_46	CDD:226667	32.812	64	43	0	191	254	177	240	0.00089	37.8
tig00001_47	CDD:224005	47.484	318	153	4	1	318	1	304	2.85e-108	314
tig00001_47	CDD:226962	31.225	253	170	2	11	263	58	306	6.55e-32	119
tig00001_47	CDD:224093	23.958	192	126	5	47	238	71	242	3.88e-10	56.8
tig00001_47	CDD:223633	25.532	141	97	2	160	300	153	285	4.82e-10	56.4
tig00001_47	CDD:226605	25	184	119	4	68	247	58	226	1.59e-09	55
tig00001_47	CDD:226645	22.374	219	149	4	33	247	51	252	1.11e-06	46.5
tig00001_47	CDD:226633	34.694	98	59	2	161	256	181	275	6.86e-05	40.9
tig00001_47	CDD:226667	24.623	199	117	6	61	247	98	275	0.000207	39.4
tig00001_48	CDD:223947	59.698	397	150	6	2	388	1	397	0	635
tig00001_48	CDD:226161	32.812	64	39	2	286	348	310	370	4.7e-07	48.5
tig00001_48	CDD:223768	25.893	112	66	5	287	386	403	509	0.000266	40
tig00001_48	CDD:225661	19.444	108	66	5	281	370	250	354	0.006	35.5
tig00001_49	CDD:223084	43.82	267	138	7	7	269	1	259	5.64e-104	300
tig00001_49	CDD:223883	21.512	172	105	7	105	269	82	230	0.004	34.9
tig00001_50	CDD:223883	62.553	235	88	0	1	235	2	236	2.48e-136	379
tig00001_50	CDD:225376	35.51	245	136	6	3	232	7	244	6.34e-52	165
tig00001_50	CDD:223846	23.81	168	116	4	48	205	36	201	6.41e-13	63.1
tig00001_51	CDD:223661	66.228	228	77	0	1	228	1	228	1.42e-146	405
tig00001_51	CDD:223483	25.893	224	136	3	1	224	2	195	1.88e-36	124
tig00001_51	CDD:224973	31.944	72	43	2	1	70	1	68	4.96e-06	42.3
tig00001_52	CDD:224872	31.25	208	126	5	1	191	1	208	2.45e-22	87.2
tig00001_53	CDD:223198	50.667	225	108	3	1	223	4	227	4.03e-100	287
tig00001_53	CDD:224268	17.986	139	89	6	4	122	78	211	1.29e-05	41.8
tig00001_53	CDD:227016	27.66	47	31	1	1	44	1	47	0.002	35.7
tig00001_53	CDD:227345	25.424	59	41	1	9	64	148	206	0.006	33.8
tig00001_54	CDD:223126	69.118	136	29	1	1	136	7	129	5.15e-72	209
tig00001_55	CDD:223127	63.514	148	54	0	2	149	1	148	1.73e-87	249
tig00001_55	CDD:223131	24.286	70	41	3	37	94	187	256	0.003	33.8
tig00001_56	CDD:223556	66.858	697	226	4	1	694	1	695	0	1103
tig00001_56	CDD:226593	30.707	495	263	17	11	472	13	460	3.88e-71	237
tig00001_56	CDD:224138	22.617	703	303	17	9	691	4	485	1.19e-59	208
tig00001_56	CDD:223557	22.604	699	290	22	7	676	6	482	1.39e-39	151
tig00001_56	CDD:227581	31.373	153	84	4	12	143	9	161	6.51e-18	83.9
tig00001_56	CDD:223606	32.857	140	59	4	15	144	10	124	3.57e-14	72.6
tig00001_56	CDD:223128	35.938	128	79	2	12	138	14	139	1.04e-12	67.3
tig00001_56	CDD:225448	32.857	140	72	5	18	138	14	150	2.15e-09	56.9
tig00001_56	CDD:225815	25.581	129	80	2	12	139	2	115	4.71e-08	52.8
tig00001_56	CDD:224082	23.148	108	62	4	68	154	44	151	1.39e-05	44.9
tig00001_56	CDD:224082	25.263	95	60	3	60	143	211	305	0.005	36.8
tig00001_56	CDD:225138	17.419	155	115	5	13	166	13	155	2.89e-05	42.4
tig00001_56	CDD:225919	41.667	48	23	3	390	433	117	163	0.005	36.5
tig00001_56	CDD:223296	21.795	78	48	3	76	140	71	148	0.005	36.1
tig00001_57	CDD:223128	82.697	393	67	1	1	393	1	392	0	750
tig00001_57	CDD:227581	33.716	436	227	12	9	394	4	427	4.69e-86	265
tig00001_57	CDD:225815	28.571	336	206	6	13	348	1	302	1.3e-53	181
tig00001_57	CDD:227582	30.435	460	205	19	1	392	1	413	8.89e-47	162
tig00001_57	CDD:227583	29.812	426	243	17	10	393	115	526	1.96e-44	158
tig00001_57	CDD:225448	30.588	340	189	15	8	316	2	325	2.12e-39	142
tig00001_57	CDD:224138	34.155	284	146	15	14	274	7	272	9.31e-31	120
tig00001_57	CDD:223556	35.115	131	77	5	14	139	12	139	2.92e-23	98.9
tig00001_57	CDD:223606	34.661	251	117	13	19	257	12	227	7.76e-21	91.1
tig00001_57	CDD:223557	26.8	250	139	7	14	247	11	232	2.15e-14	71.8
tig00001_57	CDD:226593	31.818	132	75	4	18	139	18	144	1.17e-11	63
tig00001_57	CDD:225138	22.778	180	123	7	13	191	11	175	0.000481	37.8
tig00001_58	CDD:223129	74.51	102	26	0	1	102	1	102	4.83e-58	171
tig00001_59	CDD:223165	58.685	213	83	3	2	209	1	213	6.47e-111	313
tig00001_60	CDD:223166	49.763	211	102	4	1	207	1	211	7.3e-91	262
tig00001_61	CDD:223167	49.474	95	45	3	3	95	1	94	1.33e-28	96.1
tig00001_62	CDD:223168	65.818	275	93	1	1	275	1	274	2.36e-169	466
tig00001_63	CDD:223263	67.391	92	30	0	1	92	1	92	1.81e-53	158
tig00001_64	CDD:223169	61.404	114	44	0	2	115	5	118	1.06e-58	173
tig00001_65	CDD:223170	63.054	203	73	2	12	212	1	203	1.53e-111	316
tig00001_65	CDD:224081	28.169	71	37	5	52	108	212	282	0.002	35.6
tig00001_65	CDD:224760	22.973	74	51	3	37	105	66	138	0.005	33.8
tig00001_66	CDD:223275	57.931	145	59	1	1	143	2	146	1.25e-69	203
tig00001_67	CDD:223333	62.295	61	23	0	2	62	4	64	3.07e-17	65
tig00001_68	CDD:223264	63.855	83	30	0	5	87	5	87	1.53e-37	118
tig00001_69	CDD:223171	72.131	122	34	0	1	122	1	122	2.45e-71	206
tig00001_70	CDD:223276	67.308	104	29	3	1	101	3	104	2.17e-30	101
tig00001_71	CDD:223172	67.039	179	59	0	1	179	1	179	3.03e-111	311
tig00001_72	CDD:223277	57.377	61	26	0	1	61	1	61	2.7e-28	92.7
tig00001_73	CDD:223174	59.848	132	53	0	1	132	1	132	2.66e-75	217
tig00001_74	CDD:223175	61.453	179	67	2	1	178	1	178	1.6e-89	256
tig00001_75	CDD:223334	60.484	124	43	1	1	118	2	125	8.85e-56	167
tig00001_76	CDD:223176	65.854	164	55	1	4	166	17	180	5.61e-84	242
tig00001_77	CDD:224754	54.545	55	25	0	4	58	1	55	1.93e-20	72.6
tig00001_78	CDD:223278	57.616	151	59	4	1	146	1	151	1.06e-58	176
tig00001_78	CDD:224641	35.616	73	34	1	71	143	43	102	8.41e-07	42.3
tig00001_79	CDD:223279	44.573	433	230	5	1	430	6	431	4.08e-157	448
tig00001_80	CDD:223637	44.131	213	83	2	1	213	1	177	1.09e-72	215
tig00001_80	CDD:224027	38.889	36	22	0	1	36	1	36	3.68e-06	42.7
tig00001_80	CDD:223360	37.931	29	18	0	10	38	14	42	0.000566	36.8
tig00001_81	CDD:223438	69.444	72	22	0	1	72	1	72	4.29e-37	115
tig00001_82	CDD:223335	73.684	38	10	0	1	38	1	38	1.18e-13	54.2
tig00001_83	CDD:223177	66.116	121	40	1	1	120	1	121	9.01e-60	176
tig00001_84	CDD:223178	66.667	129	43	0	1	129	1	129	2.48e-69	201
tig00001_85	CDD:223280	53.226	310	142	2	4	312	1	308	3.48e-142	400
tig00001_86	CDD:223281	56	125	41	1	2	126	6	116	6.04e-59	175
tig00001_86	CDD:224348	23.529	51	38	1	65	115	260	309	0.009	31.8
tig00001_87	CDD:224047	51.282	234	110	3	3	234	2	233	1.13e-107	309
tig00001_87	CDD:224051	39.565	230	131	7	3	229	1	225	4.9e-71	216
tig00001_87	CDD:224058	43.966	232	123	4	4	229	1	231	1.24e-68	213
tig00001_87	CDD:224045	35.714	238	142	5	3	235	1	232	2.07e-66	205
tig00001_87	CDD:224041	34.94	249	139	6	3	250	2	228	1.92e-61	192
tig00001_87	CDD:224054	31.439	264	174	5	1	262	1	259	1.94e-61	193
tig00001_87	CDD:224048	39.815	216	124	5	21	230	305	520	3.94e-59	193
tig00001_87	CDD:224048	35.743	249	136	9	1	230	2	245	3.42e-50	170
tig00001_87	CDD:226361	36.087	230	139	5	1	228	2	225	3.21e-58	187
tig00001_87	CDD:224059	33.778	225	140	5	4	221	1	223	7.15e-57	179
tig00001_87	CDD:223521	30.738	244	148	7	4	228	1	242	1.13e-56	182
tig00001_87	CDD:224049	32.051	234	152	6	3	231	2	233	2.39e-56	178
tig00001_87	CDD:226359	36	225	137	4	5	228	4	222	3.19e-55	178
tig00001_87	CDD:224050	36.564	227	137	4	4	227	1	223	4.07e-54	175
tig00001_87	CDD:224043	37.089	213	129	4	20	228	15	226	5.8e-54	175
tig00001_87	CDD:224046	33.898	236	142	7	1	230	1	228	9.36e-53	169
tig00001_87	CDD:225183	35.043	234	130	6	5	227	472	694	3.24e-51	175
tig00001_87	CDD:226164	34.568	243	134	7	2	227	1	235	3.38e-51	165
tig00001_87	CDD:224052	37.021	235	136	8	1	228	5	234	7.33e-51	165
tig00001_87	CDD:226643	38.605	215	118	4	22	227	43	252	9.57e-51	168
tig00001_87	CDD:224055	33.607	244	139	6	5	237	329	560	2.36e-48	166
tig00001_87	CDD:226967	31.933	238	114	6	1	229	1	199	2.76e-47	156
tig00001_87	CDD:225438	35.586	222	133	6	4	220	1	217	4.72e-47	154
tig00001_87	CDD:224042	33.471	242	142	7	1	230	4	238	1.46e-46	153
tig00001_87	CDD:227321	30.252	238	144	6	5	232	321	546	2.25e-44	155
tig00001_87	CDD:226961	33.607	244	142	6	2	230	4	242	7.91e-44	146
tig00001_87	CDD:223488	32.159	227	129	5	22	229	19	239	8.64e-44	146
tig00001_87	CDD:224044	29.741	232	151	7	1	223	28	256	1.04e-43	146
tig00001_87	CDD:226641	31.818	220	135	6	22	230	302	517	7.8e-43	150
tig00001_87	CDD:226641	32.661	248	145	10	2	230	4	248	4.1e-42	148
tig00001_87	CDD:226635	31.858	226	143	4	5	223	3	224	2.91e-41	139
tig00001_87	CDD:226360	33.19	232	137	7	22	239	3	230	3.71e-41	139
tig00001_87	CDD:227320	26.496	234	150	6	4	226	336	558	4.08e-40	143
tig00001_87	CDD:226647	35.922	206	125	4	21	221	24	227	4.81e-39	133
tig00001_87	CDD:226637	30.041	243	154	6	1	230	1	240	5.75e-39	134
tig00001_87	CDD:226364	33.058	242	138	10	1	227	1	233	8.26e-38	136
tig00001_87	CDD:226364	25.82	244	155	10	2	227	255	490	1.81e-17	78.7
tig00001_87	CDD:224026	30.159	252	152	8	1	235	1	245	1.85e-37	130
tig00001_87	CDD:226929	29.461	241	154	7	4	235	1	234	3.32e-37	129
tig00001_87	CDD:226905	31.466	232	139	6	20	237	18	243	5.34e-37	129
tig00001_87	CDD:226927	28.761	226	153	6	4	227	1	220	7.07e-37	128
tig00001_87	CDD:224053	27.444	266	171	9	1	253	5	261	7.15e-37	133
tig00001_87	CDD:224053	24.268	239	157	9	2	227	261	488	9.87e-20	85.6
tig00001_87	CDD:226963	29.796	245	161	6	4	244	1	238	2.98e-36	127
tig00001_87	CDD:223487	30.364	247	143	9	2	235	1	231	4.56e-36	126
tig00001_87	CDD:224057	29.907	214	129	6	21	230	41	237	8.57e-35	123
tig00001_87	CDD:226970	30.556	216	139	6	7	218	4	212	1.2e-33	119
tig00001_87	CDD:223562	28.632	234	120	8	3	223	320	519	2.23e-32	121
tig00001_87	CDD:223562	29.707	239	137	9	3	220	2	230	3.21e-27	107
tig00001_87	CDD:226628	25.221	226	154	6	9	229	3	218	9.89e-31	114
tig00001_87	CDD:227590	30.342	234	142	5	9	231	265	488	9.54e-30	114
tig00001_87	CDD:223473	29.218	243	146	10	7	236	4	233	8.8e-29	107
tig00001_87	CDD:226620	29	200	131	5	23	217	18	211	1.35e-28	106
tig00001_87	CDD:226969	31.579	228	124	10	20	230	349	561	2.09e-28	110
tig00001_87	CDD:227019	26.19	252	164	9	1	239	2	244	9.17e-28	104
tig00001_87	CDD:226952	30.093	216	131	7	21	226	38	243	1.8e-26	102
tig00001_87	CDD:226968	27.966	236	153	7	5	237	323	544	1.12e-25	102
tig00001_87	CDD:224060	27.917	240	146	11	1	227	1	226	1.56e-24	95.7
tig00001_87	CDD:227118	30.952	210	123	9	21	215	25	227	4.58e-24	94.4
tig00001_87	CDD:226592	31.25	240	137	9	2	222	4	234	1.98e-23	93.3
tig00001_87	CDD:226646	26.368	201	121	8	5	199	393	572	2.52e-23	96.2
tig00001_87	CDD:226617	27.778	180	106	6	7	177	3	167	1.08e-22	90
tig00001_87	CDD:226631	27.53	247	164	7	3	245	1	236	1.41e-22	91.7
tig00001_87	CDD:224166	28	175	103	4	29	201	363	516	2.61e-16	75.4
tig00001_87	CDD:224166	27.128	188	112	7	29	201	96	273	3.89e-12	63.1
tig00001_87	CDD:226639	25.087	287	164	12	3	249	2	277	2.71e-16	74.5
tig00001_87	CDD:225265	21.053	209	144	5	20	221	396	590	7.27e-15	71.4
tig00001_87	CDD:226622	22.374	219	148	7	23	230	15	222	3.82e-13	64.5
tig00001_87	CDD:223496	25	84	54	2	125	200	800	882	4.69e-08	50.9
tig00001_87	CDD:223256	32.71	107	51	4	135	227	476	575	5.22e-07	47.6
tig00001_87	CDD:223256	31.25	96	56	3	141	227	823	917	0.000136	40.3
tig00001_87	CDD:223256	43.243	37	18	1	23	59	617	650	0.002	36.8
tig00001_87	CDD:223256	42.857	28	16	0	23	50	16	43	0.008	34.5
tig00001_87	CDD:223465	17.61	159	94	4	150	271	27	185	0.001	36.3
tig00001_87	CDD:224117	35.802	81	45	4	140	215	1066	1144	0.002	36.6
tig00001_87	CDD:223637	61.111	18	7	0	36	53	3	20	0.009	33.4
tig00001_88	CDD:224047	47.5	240	118	3	3	242	4	235	7.38e-109	312
tig00001_88	CDD:224058	37.447	235	142	4	3	236	2	232	1.54e-60	192
tig00001_88	CDD:224059	39.286	224	129	5	3	224	2	220	2.69e-60	188
tig00001_88	CDD:224051	36.25	240	131	9	3	236	3	226	3.79e-60	188
tig00001_88	CDD:224054	31.298	262	167	5	1	261	3	252	6.15e-60	189
tig00001_88	CDD:224050	38.519	270	140	8	3	269	2	248	1.71e-57	184
tig00001_88	CDD:224045	35	240	141	5	1	236	1	229	7.98e-57	180
tig00001_88	CDD:224052	33.607	244	149	7	3	242	9	243	2.81e-56	179
tig00001_88	CDD:226361	33.473	239	137	6	3	236	6	227	1.47e-55	180
tig00001_88	CDD:224041	37.104	221	121	5	3	222	4	207	3.65e-55	176
tig00001_88	CDD:224048	35.111	225	136	3	19	238	303	522	2.42e-54	181
tig00001_88	CDD:224048	32.743	226	143	5	19	236	21	245	4.42e-47	162
tig00001_88	CDD:226164	33.745	243	142	8	1	233	2	235	3.61e-54	173
tig00001_88	CDD:224042	34.694	245	139	8	1	236	6	238	4.43e-54	173
tig00001_88	CDD:226359	33.755	237	142	5	1	236	2	224	2.44e-52	171
tig00001_88	CDD:224043	41.667	216	119	4	21	234	16	226	2.26e-51	169
tig00001_88	CDD:223521	30.603	232	139	4	21	236	19	244	1.96e-50	166
tig00001_88	CDD:224049	32.759	232	149	4	6	236	7	232	4.05e-50	163
tig00001_88	CDD:223488	34.783	230	129	5	21	236	18	240	5.17e-50	163
tig00001_88	CDD:226643	37.327	217	130	5	22	236	43	255	9.75e-49	163
tig00001_88	CDD:226628	33.624	229	135	5	25	247	16	233	1.04e-48	162
tig00001_88	CDD:224046	32.53	249	136	11	1	238	3	230	6.42e-44	147
tig00001_88	CDD:225438	31.602	231	148	7	3	232	2	223	1.15e-43	145
tig00001_88	CDD:226635	36.481	233	135	7	1	229	1	224	2.04e-42	143
tig00001_88	CDD:226360	34.468	235	135	9	2	234	1	218	2.35e-42	142
tig00001_88	CDD:226641	32.231	242	147	6	21	259	301	528	2.68e-42	149
tig00001_88	CDD:226641	32.8	250	146	9	1	236	7	248	1.43e-36	133
tig00001_88	CDD:224055	34.274	248	140	10	2	242	328	559	4.68e-42	149
tig00001_88	CDD:227321	33.468	248	131	11	1	236	319	544	7.6e-42	148
tig00001_88	CDD:226967	32.407	216	104	3	21	236	27	200	3.07e-41	140
tig00001_88	CDD:223487	31.25	240	133	7	21	247	17	237	3.16e-40	137
tig00001_88	CDD:225183	32.5	240	138	10	2	233	471	694	2.53e-39	142
tig00001_88	CDD:226961	35.135	222	129	7	26	236	25	242	1.48e-38	133
tig00001_88	CDD:226927	31.004	229	146	6	20	245	15	234	5.51e-35	124
tig00001_88	CDD:227320	28.175	252	151	9	2	242	336	568	9.09e-34	126
tig00001_88	CDD:226905	31.05	219	133	6	18	230	13	219	1.73e-33	120
tig00001_88	CDD:224026	31.197	234	143	6	3	225	2	228	1.94e-32	117
tig00001_88	CDD:226963	31.837	245	147	8	3	242	2	231	7.08e-32	115
tig00001_88	CDD:226364	31.797	217	131	7	21	230	18	224	1.22e-31	119
tig00001_88	CDD:226364	21.973	223	156	5	22	232	273	489	1.85e-16	76
tig00001_88	CDD:224053	30.876	217	134	8	21	230	22	229	1.22e-31	119
tig00001_88	CDD:224053	22.564	195	130	5	43	225	295	480	7.11e-14	68.3
tig00001_88	CDD:224044	25.62	242	148	10	3	229	32	256	1.53e-31	115
tig00001_88	CDD:226647	34.928	209	121	6	23	225	26	225	7.3e-31	112
tig00001_88	CDD:226970	32.11	218	133	5	23	238	19	223	4.03e-30	110
tig00001_88	CDD:226637	29.493	217	147	2	20	234	26	238	3.87e-28	106
tig00001_88	CDD:227590	30.165	242	146	8	2	236	262	487	5.01e-27	106
tig00001_88	CDD:223473	31.557	244	133	11	23	246	20	249	9.13e-27	102
tig00001_88	CDD:226929	28	225	141	6	20	233	14	228	9.14e-27	102
tig00001_88	CDD:226952	28.571	231	144	5	22	243	39	257	6.83e-26	101
tig00001_88	CDD:224057	27.602	221	133	7	19	235	39	236	6.47e-25	97.3
tig00001_88	CDD:226969	27.632	228	143	7	19	237	348	562	8.18e-25	100
tig00001_88	CDD:224060	27.778	216	144	6	25	236	22	229	1.94e-23	93
tig00001_88	CDD:226592	29.954	217	133	4	25	228	24	234	3.33e-23	92.9
tig00001_88	CDD:226620	29.843	191	120	6	23	209	18	198	9.43e-23	90.7
tig00001_88	CDD:226631	23.944	213	149	4	22	233	17	217	5.7e-22	90.5
tig00001_88	CDD:223562	28.07	228	136	9	1	211	2	218	1.17e-21	91.5
tig00001_88	CDD:223562	26.908	249	132	10	3	242	322	529	6.41e-21	89.2
tig00001_88	CDD:226617	28.947	190	117	7	20	205	14	189	5.24e-21	85.8
tig00001_88	CDD:227019	28.992	238	146	10	21	246	19	245	8.23e-21	86.2
tig00001_88	CDD:226639	26.693	251	158	8	1	233	4	246	1.26e-20	87.2
tig00001_88	CDD:226968	30.531	226	133	10	3	225	323	527	2.5e-20	87.5
tig00001_88	CDD:227118	31.351	185	119	5	25	204	29	210	1.5e-18	79.8
tig00001_88	CDD:225265	29.947	187	115	4	19	204	395	566	1.04e-15	74.1
tig00001_88	CDD:226646	20.952	210	130	9	2	204	392	572	1.44e-13	67.7
tig00001_88	CDD:226622	23.005	213	124	8	38	233	30	219	6.7e-12	61.4
tig00001_88	CDD:224166	26.601	203	116	11	29	230	363	533	5.51e-11	59.6
tig00001_88	CDD:224166	25.359	209	120	7	29	219	96	286	8.69e-10	56.2
tig00001_88	CDD:223256	33.613	119	68	5	127	236	804	920	4.82e-10	57.2
tig00001_88	CDD:223256	30.864	162	73	9	117	248	444	596	1e-07	49.9
tig00001_88	CDD:223496	27.381	84	51	3	146	221	816	897	1.47e-06	46.3
tig00001_88	CDD:226984	25.166	151	92	8	72	212	197	336	1.97e-05	42.5
tig00001_88	CDD:227596	26.506	83	59	2	21	102	452	533	0.001	37.7
tig00001_89	CDD:223692	41.923	260	140	3	5	264	1	249	5.2e-52	167
tig00001_90	CDD:223179	47.984	248	126	2	1	248	1	245	1.16e-116	331
tig00001_92	CDD:225130	20.578	277	168	12	1	258	7	250	4.42e-18	78.3
tig00001_92	CDD:224157	47.619	21	11	0	58	78	42	62	0.000701	37.4
tig00001_92	CDD:224155	29.73	74	27	4	6	78	17	66	0.002	36.2
tig00001_92	CDD:224696	37.838	37	20	1	42	78	214	247	0.002	36.1
tig00001_92	CDD:225212	26.471	34	22	1	63	93	88	121	0.008	33.8
tig00001_93	CDD:224439	41.429	70	41	0	1	70	5	74	2.17e-21	79.4
tig00001_93	CDD:226652	25	68	49	1	5	70	24	91	1.41e-05	38.7
tig00001_93	CDD:223713	30.612	49	34	0	1	49	22	70	0.003	31.3
tig00001_93	CDD:225222	28.261	46	33	0	9	54	16	61	0.005	31.2
tig00001_93	CDD:224759	34.146	41	27	0	9	49	27	67	0.006	30.6
tig00001_94	CDD:225382	38.947	190	113	3	1	189	129	316	1.05e-42	142
tig00001_95	CDD:224472	22.619	84	55	3	33	107	61	143	0.001	33.6
tig00001_97	CDD:225398	17.04	223	158	5	6	206	70	287	8.95e-26	98.3
tig00001_98	CDD:226888	36.069	865	533	10	6	862	1	853	0	555
tig00001_99	CDD:223305	45.588	68	31	2	1	62	1	68	2.63e-19	70.8
tig00001_100	CDD:224221	49.153	118	57	2	1	117	1	116	2.07e-37	120
tig00001_101	CDD:224378	55.277	559	233	4	2	560	1	542	0	733
tig00001_102	CDD:224121	49.559	680	325	11	1	668	3	676	0	903
tig00001_102	CDD:224118	38.614	404	230	8	226	622	567	959	5.27e-113	363
tig00001_102	CDD:226583	23.739	337	201	15	254	568	98	400	5.89e-14	71.3
tig00001_102	CDD:223989	21.836	403	222	20	226	569	5	373	1.26e-12	67.5
tig00001_102	CDD:224119	23.96	505	255	27	219	627	165	636	2.09e-12	67.4
tig00001_102	CDD:223587	20.06	334	230	15	284	596	76	393	2.31e-11	63.7
tig00001_102	CDD:224124	21.671	383	228	19	234	568	176	534	9.05e-11	62.1
tig00001_102	CDD:224123	22.018	327	201	16	278	568	229	537	4.56e-09	56.7
tig00001_102	CDD:224126	18.976	332	204	17	284	568	95	408	4.28e-07	50.1
tig00001_102	CDD:224035	25.926	108	67	5	268	363	82	188	2.66e-06	47.8
tig00001_102	CDD:224035	23.611	72	50	2	461	532	123	189	0.001	39.3
tig00001_102	CDD:224036	30.282	142	77	7	284	411	39	172	3.86e-06	47
tig00001_102	CDD:224125	19.126	366	185	14	284	568	57	392	8.43e-06	45.8
tig00001_102	CDD:223588	20.701	314	206	13	284	577	42	332	2.58e-05	44.2
tig00001_102	CDD:226947	18.605	172	123	6	170	340	45	200	0.003	37.8
tig00001_103	CDD:223493	48.955	335	163	3	1	330	2	333	1.78e-158	443
tig00001_104	CDD:223314	40	80	48	0	1	80	1	80	5.44e-16	63.1
tig00001_105	CDD:223521	58.544	316	125	4	6	319	1	312	1.12e-168	468
tig00001_105	CDD:224048	55.769	260	114	1	5	264	4	262	2.92e-130	379
tig00001_105	CDD:224048	45.455	264	129	5	6	262	280	535	2.67e-94	287
tig00001_105	CDD:226641	50.379	264	128	2	1	262	1	263	2.07e-117	346
tig00001_105	CDD:226641	40.773	233	129	4	30	261	307	531	3.63e-75	237
tig00001_105	CDD:224049	42.969	256	134	4	6	261	3	246	6.11e-94	277
tig00001_105	CDD:226967	40.823	316	129	8	6	314	4	268	2.17e-93	276
tig00001_105	CDD:226639	39.667	300	170	5	6	296	3	300	1.69e-74	230
tig00001_105	CDD:224058	37.931	232	129	6	30	259	26	244	4.11e-61	195
tig00001_105	CDD:224059	36.752	234	136	7	6	238	1	223	1.68e-60	190
tig00001_105	CDD:226637	37.308	260	146	6	6	259	4	252	3.04e-59	188
tig00001_105	CDD:224051	37.229	231	132	6	30	260	22	239	3.24e-57	182
tig00001_105	CDD:224052	34.483	261	157	6	1	261	3	249	2.14e-51	168
tig00001_105	CDD:226361	33.929	224	133	4	30	253	25	233	3.23e-50	168
tig00001_105	CDD:224054	30.698	215	134	5	30	244	25	224	1.93e-49	164
tig00001_105	CDD:226643	36.889	225	132	4	30	254	48	262	6.84e-49	165
tig00001_105	CDD:224041	39.303	201	103	5	30	230	23	204	8.53e-49	161
tig00001_105	CDD:224047	33.184	223	131	6	30	249	24	231	8.59e-48	158
tig00001_105	CDD:224050	31.325	249	159	6	30	278	21	257	1.48e-46	157
tig00001_105	CDD:226592	35.252	278	143	8	1	262	1	257	3.95e-45	152
tig00001_105	CDD:224043	30.345	290	180	8	30	312	22	296	2.33e-44	152
tig00001_105	CDD:224045	31.507	219	134	6	30	245	22	227	1.85e-43	147
tig00001_105	CDD:226359	31.489	235	139	8	30	261	23	238	1.97e-42	147
tig00001_105	CDD:224042	32.489	237	130	12	30	254	27	245	2.21e-41	142
tig00001_105	CDD:226164	32.7	263	145	9	7	260	4	243	8.68e-41	140
tig00001_105	CDD:226647	32.911	237	148	6	1	237	1	226	1.13e-37	131
tig00001_105	CDD:224046	33.654	208	106	9	30	227	24	209	1.24e-37	132
tig00001_105	CDD:226905	34.314	204	115	5	30	233	25	209	3.5e-37	131
tig00001_105	CDD:224053	28.906	256	145	12	1	244	3	233	3.18e-34	128
tig00001_105	CDD:224053	28.452	239	142	9	6	236	263	480	3.76e-20	88
tig00001_105	CDD:226360	32.883	222	133	6	37	258	26	231	1.59e-32	118
tig00001_105	CDD:225438	31.963	219	113	8	30	236	22	216	5.02e-32	116
tig00001_105	CDD:226961	29.167	264	162	8	7	260	7	255	1.38e-31	116
tig00001_105	CDD:227321	27.803	223	131	8	30	244	341	541	5.62e-31	119
tig00001_105	CDD:225183	31.818	220	113	12	30	237	493	687	6.7e-31	120
tig00001_105	CDD:226635	33.945	218	125	9	37	249	29	232	1.61e-30	113
tig00001_105	CDD:224055	36.073	219	119	10	30	244	349	550	7.17e-30	116
tig00001_105	CDD:226628	30.594	219	136	6	30	248	18	220	3.14e-29	112
tig00001_105	CDD:223488	27.189	217	133	8	30	234	24	227	6.74e-29	109
tig00001_105	CDD:226364	33.333	222	111	10	30	238	24	221	1.9e-26	106
tig00001_105	CDD:226364	28.627	255	151	10	2	243	253	489	1.03e-21	92.6
tig00001_105	CDD:226620	32.812	192	107	8	30	217	22	195	5.1e-26	100
tig00001_105	CDD:226927	27.459	244	148	7	6	244	1	220	5.51e-26	100
tig00001_105	CDD:227320	28.033	239	149	9	3	237	333	552	2.26e-25	103
tig00001_105	CDD:223487	27.668	253	148	8	6	249	3	229	6.86e-24	95.2
tig00001_105	CDD:226929	29.046	241	140	10	6	236	1	220	4.26e-23	93.6
tig00001_105	CDD:226631	25.083	303	167	13	30	318	22	278	1.89e-22	92.4
tig00001_105	CDD:224026	25.792	221	132	6	30	236	26	228	5e-20	85.1
tig00001_105	CDD:223473	27.854	219	143	10	30	244	24	231	1.63e-19	83.4
tig00001_105	CDD:226970	26.512	215	140	6	30	243	23	220	1.73e-19	83
tig00001_105	CDD:226952	27.027	222	134	6	30	244	44	244	1.8e-19	84.7
tig00001_105	CDD:226963	25.862	232	143	8	30	248	21	236	2.29e-19	83.1
tig00001_105	CDD:227019	29.245	212	130	9	30	234	25	223	2.84e-19	82.8
tig00001_105	CDD:227590	29.825	228	127	12	30	247	283	487	8.23e-19	83.9
tig00001_105	CDD:224060	28.39	236	145	12	3	234	1	216	1.21e-18	80.7
tig00001_105	CDD:224057	26.638	229	119	10	30	247	47	237	1.65e-18	80.7
tig00001_105	CDD:226617	27.136	199	113	8	30	221	22	195	2.62e-18	79.3
tig00001_105	CDD:227118	27.311	238	144	9	6	230	4	225	3.03e-17	76.7
tig00001_105	CDD:223562	27	200	120	7	30	216	23	209	3.97e-17	79.2
tig00001_105	CDD:223562	22.581	248	150	11	2	243	317	528	4.23e-17	78.8
tig00001_105	CDD:224044	25.773	194	123	7	30	215	51	231	1.81e-16	75
tig00001_105	CDD:226968	27.83	212	125	11	32	240	345	531	3.55e-15	73.3
tig00001_105	CDD:224166	25.333	225	141	8	32	249	96	300	6.46e-15	72.3
tig00001_105	CDD:224166	22.791	215	117	8	30	232	354	531	5.14e-12	63.5
tig00001_105	CDD:226969	27.315	216	123	11	30	234	356	548	2.64e-14	70.8
tig00001_105	CDD:226646	26.042	192	104	7	30	215	413	572	3.36e-11	61.2
tig00001_105	CDD:226622	24	250	145	10	5	243	2	217	1.01e-08	52.2
tig00001_105	CDD:225265	23.005	213	132	9	31	237	404	590	2.78e-08	52.2
tig00001_105	CDD:223256	34	100	53	7	132	225	800	892	9.18e-06	44.5
tig00001_105	CDD:223496	28.421	95	55	4	157	240	816	908	0.000147	40.5
tig00001_106	CDD:224048	48.846	260	130	2	4	262	280	537	3.36e-122	358
tig00001_106	CDD:224048	41.791	268	143	4	1	262	2	262	6.89e-96	291
tig00001_106	CDD:226967	48.872	266	91	2	1	266	1	221	2.04e-117	336
tig00001_106	CDD:223521	44.403	268	133	5	4	262	1	261	1.54e-111	323
tig00001_106	CDD:224049	45.211	261	131	3	2	262	1	249	3.84e-108	312
tig00001_106	CDD:226641	45.946	259	138	2	4	261	276	533	2.3e-106	317
tig00001_106	CDD:226641	41.697	271	138	6	1	260	2	263	4.83e-88	270
tig00001_106	CDD:226637	34.733	262	156	3	1	257	1	252	5.75e-69	213
tig00001_106	CDD:224058	33.716	261	159	5	4	262	1	249	4.78e-64	202
tig00001_106	CDD:226361	30.769	247	152	4	1	247	2	229	6.54e-59	190
tig00001_106	CDD:224051	31.801	261	149	7	4	258	2	239	1.35e-56	180
tig00001_106	CDD:224054	30.738	244	147	6	1	242	1	224	3.02e-52	170
tig00001_106	CDD:226639	35.772	246	142	7	28	259	20	263	2.49e-51	169
tig00001_106	CDD:224059	30.932	236	147	6	4	236	1	223	1.68e-50	164
tig00001_106	CDD:224050	37.104	221	126	5	30	246	16	227	6.78e-50	165
tig00001_106	CDD:226359	27.174	276	180	6	1	276	1	255	1.89e-49	165
tig00001_106	CDD:224052	30.159	252	155	8	1	247	5	240	3.14e-49	162
tig00001_106	CDD:224043	32.468	231	142	6	30	255	17	238	5.26e-48	161
tig00001_106	CDD:226643	31.474	251	155	5	25	268	38	278	1.54e-46	158
tig00001_106	CDD:224047	29.388	245	156	6	4	247	3	231	2.03e-45	151
tig00001_106	CDD:226164	30.612	245	150	4	5	242	4	235	4e-44	148
tig00001_106	CDD:224046	29.528	254	148	6	1	247	1	230	2.14e-43	146
tig00001_106	CDD:224041	30.396	227	135	5	2	228	1	204	2.56e-43	146
tig00001_106	CDD:224045	25.806	279	174	8	4	276	2	253	2.81e-43	146
tig00001_106	CDD:223488	29.004	231	144	6	30	247	19	242	1.87e-38	133
tig00001_106	CDD:226592	30.612	245	146	5	32	261	23	258	2.25e-36	128
tig00001_106	CDD:224053	26.506	249	153	8	1	242	5	230	2.77e-36	133
tig00001_106	CDD:224053	23.83	235	135	7	31	242	275	488	1.27e-20	89.1
tig00001_106	CDD:226927	26.531	245	151	7	4	243	1	221	1.26e-34	123
tig00001_106	CDD:225183	28.968	252	136	11	5	242	472	694	1.44e-33	127
tig00001_106	CDD:226647	29.048	210	143	5	27	235	22	226	2.82e-33	119
tig00001_106	CDD:225438	31.604	212	140	4	30	241	17	223	2.86e-33	119
tig00001_106	CDD:226961	29.237	236	153	5	33	258	24	255	7.91e-32	116
tig00001_106	CDD:224042	26.296	270	153	11	5	256	8	249	3.25e-31	114
tig00001_106	CDD:224055	28.854	253	140	11	5	245	329	553	3.56e-29	114
tig00001_106	CDD:223487	22.692	260	156	7	2	247	1	229	6.33e-29	108
tig00001_106	CDD:226628	27.727	220	136	6	34	246	17	220	1.05e-28	110
tig00001_106	CDD:226631	26.568	271	172	9	30	290	17	270	2.58e-28	108
tig00001_106	CDD:227321	26.693	251	145	9	5	243	319	542	3.85e-28	111
tig00001_106	CDD:226364	27.397	219	145	7	28	242	17	225	6.72e-28	109
tig00001_106	CDD:226364	25.957	235	139	7	28	242	271	490	2.51e-19	85.3
tig00001_106	CDD:226905	26.496	234	146	5	30	249	20	241	1.82e-27	104
tig00001_106	CDD:226952	27.966	236	139	5	15	238	24	240	4.67e-26	102
tig00001_106	CDD:226360	28.436	211	140	6	35	244	19	219	1.37e-25	99.3
tig00001_106	CDD:223473	28.049	246	138	11	7	237	6	227	1.66e-25	99.6
tig00001_106	CDD:226635	28.079	203	139	5	39	238	26	224	3.19e-25	98.8
tig00001_106	CDD:226969	28.947	228	133	11	27	242	348	558	4.04e-23	96.6
tig00001_106	CDD:226970	28.571	189	116	4	31	214	19	193	2e-22	90.7
tig00001_106	CDD:227320	22.677	269	160	12	4	255	336	573	6.78e-22	92.8
tig00001_106	CDD:224060	27.386	241	134	9	29	250	18	236	1.21e-21	88.8
tig00001_106	CDD:224026	28.708	209	125	7	21	215	11	209	1.34e-21	89.3
tig00001_106	CDD:227019	23.077	260	168	9	1	249	2	240	4.82e-21	87.4
tig00001_106	CDD:226929	22.634	243	154	9	23	245	3	231	3.89e-20	85.1
tig00001_106	CDD:224057	20.784	255	167	7	4	244	3	236	2.58e-19	82.7
tig00001_106	CDD:224044	21.762	193	133	6	31	213	47	231	1.03e-18	81.2
tig00001_106	CDD:226963	24.896	241	157	6	30	264	16	238	1.67e-18	80.4
tig00001_106	CDD:227590	29.333	225	119	9	33	240	281	482	1.73e-17	79.7
tig00001_106	CDD:227118	25.822	213	129	7	31	228	27	225	3.01e-17	76.7
tig00001_106	CDD:226620	26.738	187	120	7	34	215	21	195	3.32e-17	76
tig00001_106	CDD:223562	21.076	223	136	6	4	226	321	503	2.01e-16	76.5
tig00001_106	CDD:223562	21.116	251	140	5	3	226	2	221	1.4e-15	74.2
tig00001_106	CDD:226646	21.86	215	127	7	5	213	393	572	2.72e-12	64.3
tig00001_106	CDD:224166	27.027	222	127	9	27	229	82	287	7.65e-12	62.7
tig00001_106	CDD:224166	23.196	194	123	5	38	231	364	531	4.85e-09	54.2
tig00001_106	CDD:226622	23.585	212	135	8	41	242	25	219	1.18e-09	54.9
tig00001_106	CDD:225265	20	215	143	6	29	235	397	590	2.7e-08	51.8
tig00001_106	CDD:226617	22.485	169	114	6	33	198	20	174	4.53e-07	46.9
tig00001_106	CDD:226968	21.212	231	157	6	5	235	323	528	2.73e-06	45.6
tig00001_107	CDD:223674	37.812	320	195	1	1	320	1	316	1.27e-114	331
tig00001_107	CDD:226642	27.933	358	217	5	1	317	1	358	5.06e-43	149
tig00001_107	CDD:226638	26.506	332	206	5	1	315	1	311	3.44e-40	140
tig00001_107	CDD:224094	20.33	182	102	5	97	273	87	230	4.6e-06	44.6
tig00001_107	CDD:226690	29.31	58	37	1	203	256	219	276	0.008	34.7
tig00001_108	CDD:224094	30.796	289	192	4	14	302	7	287	1.47e-63	199
tig00001_108	CDD:226690	34.842	221	138	4	81	300	123	338	1.16e-38	136
tig00001_108	CDD:226640	27.09	299	200	5	10	301	8	295	9.03e-20	84.4
tig00001_108	CDD:223674	19.444	180	115	5	95	244	90	269	8.95e-05	40.6
tig00001_109	CDD:223818	23.802	605	387	18	1	586	2	551	6.32e-64	217
tig00001_109	CDD:226636	20.627	606	375	31	1	570	7	542	2.46e-33	131
tig00001_110	CDD:223644	50.698	215	103	2	1	214	3	215	1.74e-95	276
tig00001_110	CDD:224850	28.696	115	69	4	47	150	18	130	0.000431	36.1
tig00001_111	CDD:224117	40.118	1184	682	8	1	1182	1	1159	0	828
tig00001_111	CDD:223496	19.753	486	328	10	1	473	1	437	4.76e-17	83.7
tig00001_111	CDD:223496	22.892	498	323	13	678	1150	420	881	1.52e-13	72.5
tig00001_111	CDD:223496	18.859	403	289	8	676	1048	313	707	7.17e-10	60.2
tig00001_111	CDD:223496	21.302	338	240	4	682	1001	222	551	7.48e-10	60.2
tig00001_111	CDD:223496	19.943	351	263	6	162	496	400	748	7.71e-08	53.6
tig00001_111	CDD:223496	20.557	287	217	5	737	1019	157	436	2.01e-07	52.5
tig00001_111	CDD:223496	16.949	236	180	3	167	388	547	780	0.007	37.4
tig00001_111	CDD:227278	16.142	254	200	6	672	920	32	277	1.66e-09	58.2
tig00001_111	CDD:227278	17.769	242	166	4	727	935	31	272	9.33e-09	55.9
tig00001_111	CDD:227278	21.622	185	138	3	754	931	30	214	1.52e-06	49
tig00001_111	CDD:227278	17.442	258	188	7	204	443	27	277	8.8e-06	46.6
tig00001_111	CDD:227278	22.381	210	141	3	311	498	33	242	8.53e-05	43.2
tig00001_111	CDD:227278	14.8	250	181	5	242	491	41	258	8.75e-05	43.2
tig00001_111	CDD:227278	18.44	282	203	9	179	445	31	300	0.002	38.9
tig00001_111	CDD:224116	25.833	120	72	6	1	120	1	103	3.76e-09	56.8
tig00001_111	CDD:226809	19.209	177	139	1	677	853	108	280	5.14e-08	53.9
tig00001_111	CDD:226809	21.891	201	136	4	289	486	61	243	5.19e-07	50.8
tig00001_111	CDD:226809	20.426	235	167	6	175	395	67	295	2.8e-06	48.1
tig00001_111	CDD:226809	21.224	245	172	4	224	447	80	324	5.22e-05	44.2
tig00001_111	CDD:226809	18.033	183	139	3	808	983	78	256	0.004	38.1
tig00001_111	CDD:226809	18.349	218	146	4	826	1043	75	260	0.009	36.9
tig00001_111	CDD:227061	19.101	267	197	6	666	929	176	426	3.58e-07	51.4
tig00001_111	CDD:227061	16.563	803	584	19	209	981	141	887	2.96e-05	45.2
tig00001_111	CDD:226121	32.653	49	32	1	1	49	1	48	5.95e-07	50.5
tig00001_111	CDD:224495	17.582	182	131	3	735	914	11	175	1.72e-06	47.7
tig00001_111	CDD:224495	20.805	149	109	2	676	820	29	172	2.47e-05	44.3
tig00001_111	CDD:224495	23.596	178	121	4	716	893	13	175	0.001	39.3
tig00001_111	CDD:224495	20.988	162	119	1	247	399	11	172	0.007	36.6
tig00001_111	CDD:224495	22.28	193	130	5	284	463	3	188	0.008	36.6
tig00001_111	CDD:225638	21.184	321	217	8	676	984	367	663	1.79e-06	49.5
tig00001_111	CDD:225638	18.16	837	561	29	156	940	280	1044	1.8e-06	49.5
tig00001_111	CDD:223571	19.826	459	271	16	20	450	18	407	2.14e-06	48.7
tig00001_111	CDD:223571	20.165	243	176	6	671	909	150	378	0.005	38
tig00001_111	CDD:227355	17.318	358	253	13	114	457	827	1155	4.83e-06	47.8
tig00001_111	CDD:224259	18.008	261	208	2	678	936	6	262	5.57e-06	46.6
tig00001_111	CDD:225747	22.179	257	164	7	716	958	171	405	8.55e-06	46.7
tig00001_111	CDD:225747	17.928	251	182	6	203	446	130	363	0.006	37.4
tig00001_111	CDD:226400	19.212	203	145	2	753	936	22	224	1.14e-05	45.5
tig00001_111	CDD:226400	16.923	195	136	4	679	854	53	240	0.000376	40.9
tig00001_111	CDD:226400	15.247	223	160	6	232	443	38	242	0.007	36.6
tig00001_111	CDD:227606	18.703	401	290	11	577	963	199	577	1.88e-05	45.8
tig00001_111	CDD:227606	16.071	336	236	8	248	542	271	601	0.009	37.3
tig00001_111	CDD:224031	40.476	42	24	1	3	44	2	42	9.08e-05	43.3
tig00001_111	CDD:225183	27.632	76	43	2	1088	1159	608	675	0.000162	42.6
tig00001_111	CDD:225177	18.11	254	180	5	679	932	240	465	0.000173	42.5
tig00001_111	CDD:225177	16.729	269	196	7	232	490	234	484	0.001	40.2
tig00001_111	CDD:227608	16.502	303	198	8	220	482	17	304	0.000396	41.5
tig00001_111	CDD:225803	15.104	192	131	4	678	860	10	178	0.00068	40.8
tig00001_111	CDD:227250	19.444	144	104	3	679	810	310	453	0.000714	40.8
tig00001_111	CDD:227250	16.596	235	169	5	672	895	236	454	0.006	37.7
tig00001_111	CDD:226883	16.713	359	243	10	178	500	84	422	0.001	40.1
tig00001_111	CDD:226883	18	350	257	8	156	483	157	498	0.005	37.7
tig00001_111	CDD:227512	18.349	218	156	5	259	474	252	449	0.001	40
tig00001_111	CDD:227512	18.774	261	177	7	169	395	313	572	0.001	39.6
tig00001_111	CDD:226889	20.642	218	143	4	325	512	5	222	0.001	39.8
tig00001_111	CDD:226459	18.615	231	165	7	1	223	1	216	0.001	39.9
tig00001_111	CDD:226617	35.556	45	25	1	1090	1134	131	171	0.001	38.4
tig00001_111	CDD:225606	18.878	196	150	4	734	920	65	260	0.003	38.4
tig00001_111	CDD:225606	20.513	195	142	4	744	936	62	245	0.008	36.9
tig00001_111	CDD:224188	19.623	265	163	9	679	930	58	285	0.004	38.1
tig00001_111	CDD:226425	27.586	58	26	2	1	44	2	57	0.005	37
tig00001_111	CDD:226055	21.348	178	122	5	730	902	159	323	0.006	37.1
tig00001_111	CDD:224055	31.429	70	44	1	1090	1159	466	531	0.006	37.4
tig00001_111	CDD:226984	24	100	55	5	1	90	1	89	0.009	36.7
tig00001_112	CDD:223635	36.531	271	161	6	1	269	2	263	2.07e-75	227
tig00001_112	CDD:224692	42.308	52	30	0	203	254	91	142	8.14e-10	53.8
tig00001_112	CDD:223634	47.826	46	23	1	203	248	152	196	3.11e-07	46.9
tig00001_112	CDD:226292	28.44	109	69	3	1	103	6	111	2.5e-06	44.8
tig00001_112	CDD:223720	28.571	63	41	2	1	60	7	68	9.33e-05	39.9
tig00001_112	CDD:225127	31.373	51	35	0	214	264	602	652	0.000432	38.3
tig00001_112	CDD:223550	41.667	36	20	1	216	250	643	678	0.001	36.9
tig00001_113	CDD:223626	50.882	340	153	3	1	326	1	340	2.13e-144	408
tig00001_113	CDD:223615	43.774	265	133	4	62	321	37	290	9.73e-81	249
tig00001_113	CDD:224337	25.519	337	209	11	18	332	85	401	1.26e-22	94.7
tig00001_114	CDD:225470	27.063	521	331	10	1	476	2	518	2.37e-124	379
tig00001_114	CDD:224102	25.301	332	217	13	433	753	3	314	3.64e-48	170
tig00001_114	CDD:223516	23.567	157	87	7	486	630	113	248	2.44e-05	44.2
tig00001_114	CDD:223229	25.234	107	75	4	488	590	103	208	6.71e-05	42.9
tig00001_115	CDD:227793	38.621	145	87	1	4	148	2	144	2.44e-24	89.1
tig00001_116	CDD:226965	51.447	311	151	0	6	316	10	320	1.47e-117	338
tig00001_116	CDD:223682	29.907	321	213	5	6	314	11	331	4.35e-39	137
tig00001_116	CDD:226623	28.467	274	189	4	45	314	56	326	3.69e-22	91.8
tig00001_116	CDD:226964	24.924	329	213	10	1	314	6	315	1.05e-18	81.9
tig00001_116	CDD:227119	26.168	321	219	7	6	314	30	344	2.03e-17	78.6
tig00001_117	CDD:226964	42.994	314	179	0	4	317	3	316	9.65e-90	267
tig00001_117	CDD:223682	24.912	285	210	4	36	318	51	333	3.7e-23	95
tig00001_117	CDD:226965	26.244	221	143	8	39	253	49	255	4.88e-11	59.6
tig00001_117	CDD:227119	23.875	289	193	7	38	316	73	344	1.28e-10	58.5
tig00001_117	CDD:226623	22.667	225	157	6	34	253	51	263	6.16e-06	44.1
tig00001_118	CDD:226963	58.167	251	105	0	1	251	1	251	1.32e-139	389
tig00001_118	CDD:224045	39.921	253	148	2	1	249	2	254	2.05e-98	285
tig00001_118	CDD:224046	32.932	249	158	5	1	245	4	247	6.79e-66	202
tig00001_118	CDD:226929	33.469	245	156	2	1	239	1	244	3.05e-57	180
tig00001_118	CDD:226164	36.475	244	142	5	1	233	3	244	2.02e-55	175
tig00001_118	CDD:224047	37.885	227	132	5	1	222	3	225	1.01e-51	165
tig00001_118	CDD:224054	28.689	244	170	3	1	243	4	244	7.39e-49	160
tig00001_118	CDD:224050	36.842	228	140	2	1	226	1	226	1.9e-46	154
tig00001_118	CDD:226361	33.929	224	143	3	1	223	5	224	7.45e-45	151
tig00001_118	CDD:224059	35.556	225	131	7	1	215	1	221	1.46e-44	146
tig00001_118	CDD:226359	33.188	229	143	3	1	226	3	224	2.93e-43	146
tig00001_118	CDD:224051	32.589	224	146	4	1	222	2	222	5.64e-39	133
tig00001_118	CDD:223488	27.615	239	159	5	1	227	4	240	2.52e-38	131
tig00001_118	CDD:224042	33.333	234	138	9	2	223	8	235	5.99e-37	128
tig00001_118	CDD:224041	28.384	229	123	4	1	212	3	207	3.49e-36	125
tig00001_118	CDD:226643	35.047	214	133	2	17	226	44	255	9.67e-36	127
tig00001_118	CDD:226360	31.25	224	148	3	1	224	1	218	1.22e-35	124
tig00001_118	CDD:224052	31.034	232	153	4	1	227	8	237	1.29e-35	125
tig00001_118	CDD:223487	28.27	237	161	5	1	233	3	234	6.74e-35	122
tig00001_118	CDD:224048	25.974	231	143	5	8	222	298	516	8.31e-35	127
tig00001_118	CDD:224048	27.347	245	148	9	3	226	10	245	5.2e-32	119
tig00001_118	CDD:224049	26.522	230	157	6	1	222	3	228	1.14e-34	121
tig00001_118	CDD:226622	29.464	224	136	6	33	246	31	242	1.26e-34	121
tig00001_118	CDD:224043	29.956	227	150	3	1	222	2	224	1.96e-34	123
tig00001_118	CDD:223521	27.679	224	148	4	16	225	20	243	2.73e-33	119
tig00001_118	CDD:224058	32.34	235	139	6	1	222	1	228	5.33e-33	119
tig00001_118	CDD:227019	27.193	228	154	5	4	222	8	232	1.02e-32	117
tig00001_118	CDD:227321	31.148	244	144	9	2	233	321	552	1.69e-31	118
tig00001_118	CDD:227320	25.301	249	160	8	2	236	337	573	2.65e-31	118
tig00001_118	CDD:226927	25.738	237	167	6	1	234	1	231	7.77e-31	111
tig00001_118	CDD:224060	27.917	240	159	7	1	233	4	236	1.28e-30	111
tig00001_118	CDD:224055	29.778	225	137	6	13	227	341	554	2.4e-30	115
tig00001_118	CDD:226967	27.619	210	112	2	17	225	29	199	1.06e-29	109
tig00001_118	CDD:224044	27.511	229	155	5	1	220	31	257	2.73e-28	105
tig00001_118	CDD:225438	29.224	219	146	5	1	214	1	215	2.75e-28	104
tig00001_118	CDD:226628	27.273	209	138	4	19	222	16	215	3.02e-28	107
tig00001_118	CDD:226905	29.098	244	144	4	13	234	17	253	3.09e-28	105
tig00001_118	CDD:223562	24.38	242	139	6	1	214	3	228	4.58e-27	106
tig00001_118	CDD:223562	25.764	229	144	7	1	226	321	526	2.53e-26	103
tig00001_118	CDD:224053	27.119	236	166	4	1	232	8	241	4.21e-26	102
tig00001_118	CDD:224053	24.569	232	154	7	9	224	267	493	5.85e-12	61.8
tig00001_118	CDD:224057	25.446	224	140	7	9	226	35	237	6.27e-26	98.8
tig00001_118	CDD:226635	31.278	227	142	7	2	219	3	224	6.51e-26	98.8
tig00001_118	CDD:226647	27.477	222	148	5	2	214	7	224	3.33e-25	96.7
tig00001_118	CDD:226637	25.592	211	153	3	17	224	29	238	2.21e-24	95.3
tig00001_118	CDD:225183	27.039	233	147	6	2	222	472	693	5.88e-24	97.3
tig00001_118	CDD:224026	27.711	249	164	8	1	235	1	247	4.63e-23	91.6
tig00001_118	CDD:226631	24.229	227	155	6	1	222	2	216	8.15e-23	91.7
tig00001_118	CDD:226641	28.972	214	143	6	16	222	302	513	9.38e-23	93.5
tig00001_118	CDD:226641	29.778	225	137	8	16	223	25	245	1.19e-22	93.5
tig00001_118	CDD:226364	27.801	241	159	6	2	229	5	243	9.96e-23	93.4
tig00001_118	CDD:226364	21.333	225	151	6	17	223	274	490	2.51e-06	44.8
tig00001_118	CDD:226620	27.778	198	135	3	1	195	2	194	1.48e-22	89.1
tig00001_118	CDD:226961	26.471	238	154	7	2	223	7	239	3.51e-22	89
tig00001_118	CDD:226970	23.767	223	161	4	1	222	3	217	7.25e-22	87.6
tig00001_118	CDD:226952	27.477	222	133	5	17	225	40	246	8.72e-22	89.4
tig00001_118	CDD:224166	31.915	188	107	12	22	196	94	273	2.93e-20	86.6
tig00001_118	CDD:224166	26.705	176	109	2	32	207	372	527	1.25e-19	84.7
tig00001_118	CDD:226592	26.23	244	160	5	1	231	6	242	2.03e-19	81.7
tig00001_118	CDD:226969	26.991	226	139	8	14	226	349	561	7.22e-19	82.3
tig00001_118	CDD:226968	28	200	124	4	20	214	342	526	3.04e-17	77.5
tig00001_118	CDD:227590	24.464	233	146	8	10	227	271	488	6.31e-17	76.6
tig00001_118	CDD:223473	26.984	189	129	7	13	194	16	202	2.84e-13	64.5
tig00001_118	CDD:226617	28.358	134	90	2	34	167	35	162	9.79e-12	59.6
tig00001_118	CDD:226639	21.888	233	151	9	16	224	22	247	1.81e-11	60.2
tig00001_118	CDD:225265	25.275	182	120	4	16	194	398	566	1.28e-10	57.9
tig00001_118	CDD:227118	24.645	211	135	7	15	210	25	226	4.79e-10	55.1
tig00001_118	CDD:226646	22.581	186	122	8	13	194	405	572	2.51e-09	54.2
tig00001_118	CDD:223256	26.846	149	70	10	107	227	442	579	1.26e-05	43
tig00001_118	CDD:223256	30.872	149	75	9	91	225	785	919	1.81e-05	42.6
tig00001_118	CDD:226459	32.203	118	72	5	21	134	18	131	4.29e-05	41.1
tig00001_118	CDD:226121	22.124	113	82	2	26	136	22	130	0.000447	38.2
tig00001_118	CDD:223496	29.167	72	42	4	132	195	812	882	0.006	34.7
tig00001_119	CDD:226966	47.826	322	161	5	1	317	1	320	4.72e-124	355
tig00001_119	CDD:223687	26.235	324	219	9	1	316	1	312	1.64e-47	159
tig00001_119	CDD:226959	25.846	325	204	12	1	312	4	304	2.06e-36	130
tig00001_119	CDD:226928	24.074	270	183	12	56	317	41	296	6.14e-18	79.7
tig00001_119	CDD:226958	22.549	306	183	14	45	317	35	319	4.35e-10	56.8
tig00001_122	CDD:227255	28.926	121	68	4	1	117	1	107	2.74e-09	48.4
tig00001_123	CDD:224327	18.325	191	135	7	3	174	2	190	7.87e-05	40.3
tig00001_123	CDD:226400	21.795	78	45	5	145	217	77	143	0.001	37
tig00001_124	CDD:227247	26.966	89	63	2	106	192	17	105	0.003	34.6
tig00001_128	CDD:223653	44.628	242	130	3	2	242	1	239	3.28e-79	235
tig00001_129	CDD:224298	38.71	93	57	0	16	108	20	112	3.11e-20	77.3
tig00001_130	CDD:224265	45.415	229	125	0	3	231	2	230	3.27e-67	204
tig00001_131	CDD:226234	16.071	224	161	7	40	253	7	213	0.000435	39.7
tig00001_133	CDD:223959	37.154	253	148	4	7	251	2	251	1.37e-64	199
tig00001_133	CDD:226674	38.158	228	135	4	8	233	4	227	1.49e-50	163
tig00001_133	CDD:223377	24.893	233	157	4	5	230	1	222	1.65e-37	130
tig00001_133	CDD:226476	26.887	212	144	5	13	220	8	212	6.4e-19	80.2
tig00001_133	CDD:223696	22.709	251	182	6	7	249	3	249	1.26e-14	68.4
tig00001_133	CDD:223528	16.216	111	79	3	13	123	3	99	0.002	36.1
tig00001_133	CDD:224011	26.733	101	57	7	11	103	251	342	0.009	34.2
tig00001_134	CDD:227052	39.053	169	93	3	10	169	2	169	5.67e-31	107
tig00001_135	CDD:224187	43.258	178	96	3	1	174	3	179	4.93e-38	126
tig00001_136	CDD:223596	54.634	205	87	3	1	200	1	204	3.96e-91	263
tig00001_136	CDD:224110	29.412	85	44	1	93	177	3	71	9.66e-10	53.4
tig00001_136	CDD:224109	24.242	99	67	4	92	188	8	100	7.42e-06	40.4
tig00001_136	CDD:223638	34	50	31	2	93	142	13	60	0.000318	37.7
tig00001_136	CDD:225185	34.568	81	47	2	63	143	156	230	0.000338	37.3
tig00001_136	CDD:224388	42.222	45	20	3	101	142	50	91	0.004	34.2
tig00001_136	CDD:224108	24.49	49	36	1	92	140	2	49	0.005	33.8
tig00001_137	CDD:225027	24.615	260	191	2	20	277	9	265	1.01e-58	185
tig00001_138	CDD:227249	29.5	200	128	8	16	211	21	211	7.93e-21	83.7
tig00001_139	CDD:223635	32.061	262	168	4	1	254	1	260	5.68e-61	190
tig00001_139	CDD:223634	33.333	66	43	1	183	248	144	208	4.23e-09	52.3
tig00001_139	CDD:223720	31.034	58	39	1	1	58	6	62	0.001	36.8
tig00001_139	CDD:224692	25.781	128	65	7	4	121	9	116	0.001	35.7
tig00001_139	CDD:224692	23.611	72	52	1	184	255	84	152	0.003	34.6
tig00001_139	CDD:223620	43.75	32	18	0	1	32	2	33	0.002	35.5
tig00001_139	CDD:223620	20.93	43	34	0	21	63	90	132	0.008	33.6
tig00001_140	CDD:224606	57.576	264	110	2	1	263	1	263	2.51e-148	412
tig00001_141	CDD:226923	31.579	114	78	0	6	119	6	119	2.75e-12	56.3
tig00001_142	CDD:223327	46.509	888	408	15	8	879	7	843	0	999
tig00001_142	CDD:224114	26.984	378	248	12	507	880	231	584	2.49e-34	137
tig00001_143	CDD:223400	38.177	702	366	8	1	698	1	638	0	700
tig00001_143	CDD:223715	31.148	61	40	2	22	80	227	287	3.7e-05	43.2
tig00001_143	CDD:224307	21.379	145	86	6	27	148	40	179	3.96e-05	43.5
tig00001_143	CDD:226654	32.727	55	32	1	31	80	505	559	0.003	37.7
tig00001_144	CDD:223501	47.283	184	95	2	1	183	3	185	2.76e-81	236
tig00001_145	CDD:224183	33.429	350	220	6	95	439	1	342	1.31e-97	302
tig00001_145	CDD:225101	41.026	156	91	1	507	661	1	156	2.3e-51	172
tig00001_145	CDD:224184	42.529	87	49	1	5	90	1	87	8.35e-26	98.5
tig00001_145	CDD:224218	20.388	206	128	9	237	421	100	290	0.000343	40.3
tig00001_146	CDD:225099	34.498	229	149	1	1	229	6	233	9.84e-65	198
tig00001_146	CDD:225097	28.571	91	65	0	6	96	14	104	8.95e-15	68.5
tig00001_146	CDD:224089	28.767	73	52	0	1	73	3	75	1.99e-09	53.9
tig00001_146	CDD:224639	32.812	64	39	1	7	66	12	75	1.3e-07	46.1
tig00001_146	CDD:224715	37.5	56	34	1	11	66	25	79	1.54e-07	47.8
tig00001_147	CDD:223307	62.937	143	49	1	5	147	2	140	1.92e-89	253
tig00001_148	CDD:223705	44.776	201	108	3	1	198	1	201	2.71e-82	240
tig00001_149	CDD:225164	65.35	329	114	0	3	331	1	329	0	576
tig00001_149	CDD:225165	28.571	168	77	7	7	161	3	140	2.18e-17	79.6
tig00001_149	CDD:223786	23.246	228	137	9	13	216	9	222	2.44e-15	72.9
tig00001_149	CDD:224144	31.304	115	66	4	13	114	105	219	3.49e-08	51.4
tig00001_149	CDD:223541	30.392	102	52	5	30	114	152	251	6.96e-07	47.7
tig00001_149	CDD:223540	24.597	248	114	12	27	219	241	470	7.44e-07	47.5
tig00001_149	CDD:223540	29.688	128	75	5	52	171	16	136	7.5e-06	44.4
tig00001_149	CDD:224401	28.723	94	52	3	32	114	87	176	1.48e-05	42.8
tig00001_149	CDD:224143	40.909	66	31	3	57	114	188	253	2.77e-05	42.3
tig00001_149	CDD:223679	19.741	309	143	15	31	276	182	448	4.18e-05	41.8
tig00001_149	CDD:224142	27.273	132	58	6	56	161	103	222	8.19e-05	40.8
tig00001_149	CDD:225369	27.444	266	136	16	23	258	11	249	0.00018	40.1
tig00001_150	CDD:224228	17.262	168	129	3	6	164	12	178	7.7e-08	47.6
tig00001_151	CDD:223471	37.162	148	76	5	1	146	2	134	6.02e-46	144
tig00001_151	CDD:226924	33.333	45	23	1	1	45	1	38	0.004	32.5
tig00001_152	CDD:223716	33.333	51	34	0	57	107	345	395	0.007	32.3
tig00001_153	CDD:224039	46.606	442	224	4	4	445	1	430	1.06e-143	414
tig00001_154	CDD:226078	30.556	180	123	2	1	178	10	189	2.53e-29	104
tig00001_155	CDD:224038	55.679	449	198	1	2	449	6	454	0	576
tig00001_155	CDD:223903	34.672	473	279	9	2	449	37	504	1.52e-108	328
tig00001_155	CDD:223605	22.146	438	316	8	18	442	22	447	1.12e-30	120
tig00001_156	CDD:224051	62.083	240	90	1	5	244	2	240	6.47e-154	424
tig00001_156	CDD:226961	54.331	254	105	1	1	243	2	255	1.25e-117	333
tig00001_156	CDD:224058	43.874	253	124	5	5	245	1	247	1.4e-92	273
tig00001_156	CDD:226361	42.324	241	134	2	1	240	1	237	8.64e-85	253
tig00001_156	CDD:224059	42.92	226	117	8	5	221	1	223	1.53e-79	235
tig00001_156	CDD:226359	40.254	236	135	3	6	240	4	234	5.48e-77	233
tig00001_156	CDD:226635	40.664	241	136	3	6	241	3	241	4.72e-76	227
tig00001_156	CDD:224042	38.34	253	138	7	1	241	3	249	1.99e-75	226
tig00001_156	CDD:226164	39.286	252	133	7	3	243	1	243	8.96e-75	225
tig00001_156	CDD:224052	34.836	244	155	4	1	241	4	246	5.11e-72	218
tig00001_156	CDD:224047	38.627	233	138	5	4	233	2	232	3.83e-71	215
tig00001_156	CDD:224048	33.969	262	150	10	1	243	1	258	5.72e-70	221
tig00001_156	CDD:224048	34.118	255	153	4	2	241	277	531	1.61e-69	220
tig00001_156	CDD:224041	41.25	240	126	6	5	240	3	231	1.47e-69	211
tig00001_156	CDD:224050	38.174	241	143	4	5	242	1	238	1.43e-67	208
tig00001_156	CDD:224054	36.91	233	131	5	2	227	1	224	3.67e-67	206
tig00001_156	CDD:224049	34.661	251	144	8	6	244	4	246	5.01e-66	202
tig00001_156	CDD:226643	37.132	272	137	7	2	243	1	268	1.13e-64	203
tig00001_156	CDD:223521	36.923	260	136	11	5	241	1	255	1.77e-64	200
tig00001_156	CDD:223488	33.607	244	141	6	5	232	4	242	5.54e-64	197
tig00001_156	CDD:224043	41.026	234	123	5	6	231	3	229	2.76e-63	198
tig00001_156	CDD:224045	33.197	244	150	4	4	243	1	235	7.15e-62	192
tig00001_156	CDD:226967	32.941	255	112	5	2	241	1	211	2.89e-60	188
tig00001_156	CDD:225438	34.821	224	143	3	5	226	1	223	6.73e-60	185
tig00001_156	CDD:224046	34.959	246	149	5	2	242	1	240	3.33e-59	185
tig00001_156	CDD:223487	30.638	235	154	6	5	235	3	232	9.14e-56	175
tig00001_156	CDD:226360	39.614	207	119	3	23	228	17	218	3.12e-55	174
tig00001_156	CDD:224053	28.821	229	155	3	1	224	4	229	5.58e-55	181
tig00001_156	CDD:224053	26.749	243	145	7	3	227	261	488	4.71e-31	116
tig00001_156	CDD:226641	35.385	260	147	10	1	241	2	259	1.24e-53	178
tig00001_156	CDD:226641	33.858	254	137	10	11	246	293	533	9.04e-49	165
tig00001_156	CDD:226647	36.975	238	121	9	1	221	2	227	6.71e-52	165
tig00001_156	CDD:225183	34.934	229	136	8	6	227	472	694	5.25e-47	162
tig00001_156	CDD:224055	39.738	229	122	8	6	226	329	549	8.66e-46	157
tig00001_156	CDD:226364	31.963	219	142	3	2	216	1	216	1.94e-45	155
tig00001_156	CDD:226364	27.53	247	148	7	2	227	254	490	1.1e-25	101
tig00001_156	CDD:226927	29.752	242	157	8	5	243	1	232	4.65e-44	146
tig00001_156	CDD:227321	31.556	225	145	7	6	226	321	540	4.36e-43	150
tig00001_156	CDD:224060	32.599	227	145	4	5	227	4	226	5.54e-43	143
tig00001_156	CDD:227320	29.832	238	140	8	2	225	333	557	5.55e-42	147
tig00001_156	CDD:226628	31.416	226	139	7	11	231	6	220	1.29e-41	142
tig00001_156	CDD:226637	30.078	256	156	9	3	241	2	251	8.17e-39	133
tig00001_156	CDD:226970	30.734	218	143	5	5	220	3	214	1.08e-38	131
tig00001_156	CDD:226905	34.343	198	121	3	20	216	20	209	1.56e-38	132
tig00001_156	CDD:224044	27.193	228	156	5	1	219	27	253	4.32e-38	130
tig00001_156	CDD:224026	30.435	230	141	7	5	218	1	227	3.38e-35	123
tig00001_156	CDD:224057	30.172	232	132	8	6	228	25	235	1.27e-34	121
tig00001_156	CDD:226929	28.326	233	152	5	5	227	1	228	2.39e-34	121
tig00001_156	CDD:223562	25.287	261	147	8	5	235	3	245	2.58e-34	126
tig00001_156	CDD:223562	27.876	226	137	8	4	226	320	522	5.16e-33	122
tig00001_156	CDD:223473	29.876	241	140	11	3	225	1	230	5.64e-33	117
tig00001_156	CDD:226963	30.736	231	146	6	5	228	1	224	9.56e-33	117
tig00001_156	CDD:226620	29.018	224	140	7	5	221	2	213	9.92e-33	115
tig00001_156	CDD:226631	29.02	255	147	6	6	243	3	240	8.29e-32	115
tig00001_156	CDD:226592	29.231	260	163	7	1	244	2	256	8.19e-31	112
tig00001_156	CDD:227590	31.556	225	133	8	16	230	274	487	8.38e-31	115
tig00001_156	CDD:227019	28.862	246	153	8	1	232	1	238	1.06e-29	108
tig00001_156	CDD:227118	30.18	222	140	6	6	213	5	225	9.15e-27	100
tig00001_156	CDD:226617	29.381	194	126	4	7	198	4	188	8.84e-26	97.4
tig00001_156	CDD:226969	30.455	220	129	8	20	227	351	558	9.87e-26	102
tig00001_156	CDD:226968	29.386	228	143	10	4	227	321	534	4.58e-25	100
tig00001_156	CDD:224166	30.159	189	104	8	27	211	363	527	3.1e-23	95.1
tig00001_156	CDD:224166	31.507	219	84	13	27	210	96	283	2.8e-17	77.7
tig00001_156	CDD:226952	30.332	211	133	5	19	223	38	240	1.09e-21	89
tig00001_156	CDD:225265	28.384	229	134	9	7	221	379	591	1.29e-20	87.6
tig00001_156	CDD:226639	22.677	269	169	7	5	243	3	262	4.79e-18	78.7
tig00001_156	CDD:226646	26.316	190	104	10	21	199	409	573	1.68e-15	72.3
tig00001_156	CDD:226622	24.123	228	153	8	13	231	7	223	1.36e-13	65.3
tig00001_156	CDD:223256	30.37	135	78	9	122	244	803	933	3.07e-11	59.9
tig00001_156	CDD:223256	30.088	113	61	7	141	241	482	588	3.16e-07	48
tig00001_156	CDD:223256	36.957	46	24	2	1	46	1	41	0.000214	39.1
tig00001_156	CDD:223496	20.455	132	94	3	92	215	769	897	1.07e-08	52.5
tig00001_156	CDD:225586	23.256	86	53	2	142	214	322	407	4.46e-05	41
tig00001_156	CDD:226425	20.879	182	100	8	30	198	36	186	0.000535	37
tig00001_156	CDD:226984	19.469	113	86	3	112	222	244	353	0.003	35.2
tig00001_157	CDD:223836	39.91	223	124	2	293	515	10	222	3.12e-85	260
tig00001_157	CDD:226634	34.211	228	125	4	296	511	8	222	2.03e-48	164
tig00001_157	CDD:226670	33.921	227	127	4	297	510	6	222	2.1e-48	164
tig00001_157	CDD:223904	30.928	291	177	9	1	283	1	275	8.73e-41	145
tig00001_157	CDD:226960	30.714	140	96	1	373	511	253	392	2.24e-19	87.2
tig00001_157	CDD:226165	20.982	224	148	6	289	505	77	278	5.48e-15	72.3
tig00001_157	CDD:223673	21.25	240	133	14	293	511	46	250	3.24e-12	63.8
tig00001_157	CDD:224094	23.353	167	110	4	300	465	80	229	3.77e-10	58
tig00001_157	CDD:224099	17.544	171	128	3	300	467	330	490	2.09e-09	56.9
tig00001_157	CDD:224099	15.909	176	112	5	307	465	64	220	0.000226	40.7
tig00001_157	CDD:224922	24.645	211	148	4	290	496	3	206	2.92e-09	54.5
tig00001_157	CDD:226971	32.075	106	63	3	61	159	30	133	8.71e-09	54.8
tig00001_157	CDD:224098	24.39	164	95	8	290	445	49	191	2.18e-08	52.6
tig00001_157	CDD:224095	27.647	170	96	7	309	472	32	180	4.51e-08	51
tig00001_157	CDD:223654	22.794	136	96	2	308	443	76	202	3.23e-07	49.1
tig00001_157	CDD:223629	24.516	155	81	7	307	443	61	197	1.81e-06	46.5
tig00001_157	CDD:223472	21.795	156	103	6	290	442	61	200	1.26e-05	44.1
tig00001_157	CDD:223646	22	150	97	2	308	445	84	225	3.85e-05	42.6
tig00001_157	CDD:226354	19.463	149	108	4	288	436	58	194	9.07e-05	41.5
tig00001_157	CDD:225762	22.599	177	89	9	1	159	2	148	0.000261	40
tig00001_157	CDD:223787	20.158	253	151	13	1	235	2	221	0.001	38.6
tig00001_157	CDD:224096	17.722	237	163	10	300	513	65	292	0.006	35.7
tig00001_160	CDD:223915	31.25	240	153	7	6	233	2	241	9.35e-61	189
tig00001_161	CDD:223188	40	140	81	3	47	183	37	176	5.54e-46	150
tig00001_161	CDD:223975	28.667	150	64	6	44	183	55	171	1.85e-21	86.6
tig00001_161	CDD:224521	33.333	81	52	2	198	276	14	94	2.08e-20	80.8
tig00001_161	CDD:223735	24.409	127	60	5	67	183	43	143	5.42e-11	57.2
tig00001_161	CDD:223973	28.571	84	42	2	98	181	127	192	2.69e-07	47.6
tig00001_161	CDD:223973	37.5	32	20	0	133	164	17	48	0.008	34.1
tig00001_161	CDD:225082	37.255	51	32	0	129	179	180	230	3.11e-07	47.7
tig00001_161	CDD:223974	39.216	51	31	0	133	183	262	312	5.09e-07	47.3
tig00001_161	CDD:223974	42.553	47	25	1	133	177	113	159	3.83e-05	41.5
tig00001_161	CDD:223974	19.118	68	37	1	97	164	131	180	0.000115	40
tig00001_161	CDD:224128	33.962	53	32	3	133	183	399	450	2.42e-05	42.2
tig00001_161	CDD:224129	25.954	131	81	7	63	181	185	311	6.82e-05	40.8
tig00001_162	CDD:224740	42.353	170	96	1	2	171	1	168	3.28e-50	156
tig00001_162	CDD:225253	43.103	58	29	2	7	61	9	65	0.000218	37.8
tig00001_163	CDD:223320	33.69	187	103	6	2	186	1	168	2.61e-60	182
tig00001_164	CDD:223262	59.551	89	36	0	1	89	1	89	9.49e-42	128
tig00001_165	CDD:224106	61.119	697	265	1	1	697	1	691	0	1100
tig00001_165	CDD:223761	29.218	243	152	7	311	546	1	230	6.29e-22	92.4
tig00001_165	CDD:223761	26.009	223	141	10	14	223	19	230	1.25e-09	56.1
tig00001_165	CDD:224023	44.737	76	42	0	624	699	4	79	2.01e-19	81.9
tig00001_165	CDD:223613	38.182	110	66	2	591	699	158	266	5.77e-18	84.7
tig00001_165	CDD:223613	31.111	135	77	6	577	708	239	360	8.96e-16	77.7
tig00001_165	CDD:223613	41.935	93	52	2	617	708	355	446	5.66e-12	65.8
tig00001_165	CDD:223613	37.037	81	43	2	621	700	445	518	9.14e-08	52.3
tig00001_165	CDD:223613	37.778	90	52	2	620	708	16	102	1.61e-07	51.5
tig00001_165	CDD:223613	31.522	92	59	3	617	707	97	185	0.00051	40
tig00001_165	CDD:225094	35.644	101	58	4	607	704	639	735	2.32e-13	70.4
tig00001_165	CDD:224018	34.884	86	53	2	625	707	11	96	1.19e-11	62.7
tig00001_165	CDD:224032	29.293	99	62	3	585	683	84	174	2.5e-07	50.9
tig00001_165	CDD:225034	19.643	280	168	6	300	541	6	266	3.32e-07	49.3
tig00001_165	CDD:223631	36.585	82	39	3	624	692	621	702	3.64e-07	50.5
tig00001_165	CDD:224020	32.584	89	46	3	626	701	82	169	1.19e-06	46.5
tig00001_165	CDD:224447	29.167	72	45	2	616	681	28	99	1.44e-05	45
tig00001_165	CDD:224022	31.667	60	38	1	561	617	149	208	0.000499	39.2
tig00001_165	CDD:224021	17.797	118	77	2	574	681	23	130	0.001	37.7
tig00001_166	CDD:225170	35.366	82	50	1	2	80	1	82	1.71e-11	52.1
tig00001_166	CDD:226450	33.333	48	31	1	10	56	533	580	7.75e-05	36.4
tig00001_167	CDD:225700	37.979	653	353	20	2	642	6	618	0	613
tig00001_168	CDD:224173	39.45	436	250	6	1	433	3	427	5.05e-129	376
tig00001_168	CDD:226911	27.465	426	286	7	5	425	6	413	1.07e-68	221
tig00001_168	CDD:226910	31.12	241	160	4	176	413	30	267	1.59e-42	149
tig00001_168	CDD:223591	23.81	105	73	4	231	330	15	117	3.04e-07	45.9
tig00001_168	CDD:225321	27.103	107	74	3	232	336	189	293	0.000659	38.5
tig00001_168	CDD:226147	22.414	116	74	5	230	337	80	187	0.005	35.1
tig00001_168	CDD:225525	24.59	122	76	7	2	110	31	149	0.009	35
tig00001_169	CDD:223608	30.377	451	306	5	1	446	7	454	1.97e-90	279
tig00001_169	CDD:225153	24.883	213	158	2	10	222	212	422	2.08e-09	56.3
tig00001_169	CDD:225153	16.507	418	326	6	20	435	15	411	9.75e-08	50.9
tig00001_169	CDD:223800	22.667	150	110	2	76	221	297	444	2.39e-08	53.1
tig00001_169	CDD:223800	17.439	367	282	8	76	430	75	432	0.006	36.1
tig00001_169	CDD:223573	33.784	74	42	2	215	281	27	100	0.001	38.4
tig00001_171	CDD:224738	36.559	93	59	0	2	94	1	93	1.08e-23	87.3
tig00001_172	CDD:224108	37.917	240	141	6	1	233	3	241	4.75e-70	212
tig00001_172	CDD:223638	22.436	156	102	5	1	137	13	168	1.98e-07	47.7
tig00001_173	CDD:223943	34.632	231	146	5	1	229	2	229	1.18e-44	146
tig00001_173	CDD:223620	25.424	236	148	8	1	227	2	218	3.61e-16	71.7
tig00001_173	CDD:223710	18.908	238	165	8	2	231	1	218	1.34e-14	67.5
tig00001_173	CDD:223720	25.41	122	75	5	117	227	150	266	2.01e-10	56.1
tig00001_173	CDD:225090	29.231	65	32	2	151	202	90	153	1.75e-06	43.8
tig00001_174	CDD:223645	60.287	209	81	1	1	207	1	209	6.33e-98	280
tig00001_174	CDD:223998	24.648	142	88	8	6	133	82	218	8.27e-05	39.5
tig00001_174	CDD:226691	21.6	125	79	5	5	113	49	170	0.001	35.6
tig00001_174	CDD:223315	52.381	21	10	0	6	26	2	22	0.002	35
tig00001_175	CDD:223475	28	175	124	1	14	188	10	182	1.13e-22	88.2
tig00001_178	CDD:224585	36.111	144	90	1	1	144	2	143	9.33e-50	153
tig00001_179	CDD:223733	29.845	516	305	9	27	541	53	512	4.25e-108	331
tig00001_180	CDD:224102	40.751	346	168	6	1	342	3	315	2.95e-122	352
tig00001_180	CDD:223516	28.689	122	75	3	118	232	102	218	3.61e-11	61.1
tig00001_180	CDD:223105	24.242	198	122	9	118	309	88	263	9.21e-10	56.5
tig00001_180	CDD:227111	29.358	109	64	5	129	229	112	215	1.7e-06	46.5
tig00001_180	CDD:223534	25	124	80	6	109	228	94	208	8.46e-05	41.2
tig00001_180	CDD:223106	26.712	146	91	8	174	313	150	285	0.000203	40
tig00001_180	CDD:223968	24.324	111	66	5	131	231	121	223	0.003	36.6
tig00001_180	CDD:223267	23.116	199	113	14	131	315	119	291	0.006	35
tig00001_181	CDD:223841	42.982	456	244	8	21	467	1	449	3.09e-165	471
tig00001_181	CDD:223840	26.776	366	232	14	39	374	7	366	1.06e-31	123
tig00001_181	CDD:223842	26.493	268	157	11	120	374	110	350	4.57e-22	95.4
tig00001_181	CDD:223844	27.925	265	163	11	121	372	108	357	8.78e-18	82.6
tig00001_181	CDD:223362	27.354	223	117	12	175	377	141	338	2.14e-07	50
tig00001_182	CDD:223587	43.982	457	240	8	1	444	29	482	1.35e-169	485
tig00001_182	CDD:224126	23.274	391	240	18	5	350	51	426	1.94e-24	104
tig00001_182	CDD:224122	24.054	370	206	15	8	332	8	347	4.71e-22	96.9
tig00001_182	CDD:224123	26.036	338	190	16	1	304	194	505	1.11e-20	92.5
tig00001_182	CDD:223588	23.249	357	230	16	20	355	14	347	5.2e-20	90
tig00001_182	CDD:224125	24.752	202	123	12	1	185	2	191	8.13e-09	55.1
tig00001_182	CDD:224036	35.065	77	49	1	273	349	409	484	1.26e-08	54.3
tig00001_182	CDD:223989	18.592	355	215	16	37	341	54	384	2.54e-08	53.2
tig00001_182	CDD:224124	17.456	338	227	13	37	335	213	537	2.11e-07	50.5
tig00001_182	CDD:223630	26.596	94	64	1	248	336	455	548	0.000151	41.4
tig00001_182	CDD:224121	23.746	299	145	17	48	305	293	549	0.000334	40.3
tig00001_182	CDD:224557	22.324	327	202	15	41	335	68	374	0.001	38.8
tig00001_182	CDD:223627	19.091	110	81	2	229	330	701	810	0.008	35.9
tig00001_183	CDD:223807	45.238	126	56	4	1	115	1	124	3.13e-40	127
tig00001_183	CDD:225524	28.169	71	28	3	45	110	51	103	0.006	31.9
tig00001_184	CDD:223858	39.516	372	206	10	5	371	1	358	8.73e-145	411
tig00001_184	CDD:226143	26.506	166	110	4	11	170	21	180	1.45e-10	59
tig00001_184	CDD:225988	28.571	273	164	13	13	267	8	267	4.94e-06	45.1
tig00001_185	CDD:225216	41.593	113	63	2	1	112	2	112	2.33e-33	109
tig00001_186	CDD:223277	61.404	57	22	0	33	89	5	61	7.1e-24	83.1
tig00001_187	CDD:223677	29.305	331	211	9	1	313	1	326	1.59e-52	172
tig00001_187	CDD:223992	27.099	262	153	9	1	233	4	256	2.95e-31	116
tig00001_187	CDD:223991	22.901	262	154	10	14	233	11	266	5.4e-15	71.6
tig00001_187	CDD:223990	27.381	252	114	12	17	215	18	253	4.07e-13	66.1
tig00001_187	CDD:225041	21.757	239	147	14	16	234	29	247	4.48e-13	65.8
tig00001_187	CDD:223450	31.25	96	58	4	121	213	156	246	0.000662	38
tig00001_188	CDD:224428	27.897	889	529	16	10	898	3	779	1.27e-154	470
tig00001_188	CDD:223912	17.834	157	124	3	734	885	128	284	1.64e-10	59.9
tig00001_188	CDD:224117	13.536	362	271	12	204	551	184	517	2.84e-06	48.2
tig00001_188	CDD:224117	12.681	276	225	3	211	478	676	943	0.004	37.8
tig00001_188	CDD:227355	18.976	332	228	9	131	456	890	1186	1.36e-05	45.8
tig00001_188	CDD:227627	20.737	217	145	7	265	469	32	233	3.09e-05	43.7
tig00001_188	CDD:224596	20.548	146	105	6	741	880	112	252	5.21e-05	43
tig00001_188	CDD:224495	19.444	144	95	5	181	309	27	164	9.3e-05	42
tig00001_188	CDD:224380	16.854	178	120	6	365	542	136	285	0.000188	41.7
tig00001_188	CDD:224213	17.84	213	133	11	703	883	88	290	0.000322	40.7
tig00001_188	CDD:223496	14.493	276	216	8	211	474	166	433	0.000403	40.9
tig00001_188	CDD:223496	11.382	246	197	4	216	461	225	449	0.000895	40.1
tig00001_188	CDD:223496	13.804	326	233	8	186	505	505	788	0.01	36.7
tig00001_188	CDD:227608	20.859	163	117	5	372	532	4	156	0.000547	40.7
tig00001_188	CDD:224259	18.487	238	171	8	211	440	43	265	0.004	37.4
tig00001_188	CDD:224263	20.725	193	133	7	393	573	47	231	0.004	37.4
tig00001_188	CDD:226400	20.455	220	137	10	254	469	39	224	0.005	36.6
tig00001_189	CDD:223605	19.108	471	353	9	14	464	2	464	2.71e-29	118
tig00001_189	CDD:223903	19.369	444	298	16	65	462	81	510	0.000223	41.1
tig00001_190	CDD:225072	28.571	84	54	4	4	82	4	86	2.48e-07	41.6
tig00001_191	CDD:226600	33.721	86	55	1	2	87	1	84	3.27e-23	82.1
tig00001_191	CDD:226079	32.394	71	41	3	17	81	20	89	1.93e-06	39.3
tig00001_191	CDD:224937	27.5	80	53	4	4	82	3	78	0.002	31.9
tig00001_192	CDD:227068	48.936	94	45	1	50	143	27	117	2.58e-29	109
tig00001_193	CDD:224095	49.057	212	107	1	6	217	6	216	4.6e-76	225
tig00001_193	CDD:223673	32.308	195	126	3	28	217	59	252	2.33e-24	94.2
tig00001_193	CDD:226644	32.335	167	112	1	39	205	105	270	1.96e-22	89.6
tig00001_193	CDD:224922	23.497	183	125	5	12	179	1	183	1.46e-09	53.3
tig00001_193	CDD:226165	20	215	164	4	8	215	68	281	5.13e-09	52.3
tig00001_193	CDD:223654	23.944	142	95	3	35	163	76	217	0.00066	36.8
tig00001_193	CDD:223836	22.222	198	141	5	33	219	27	222	0.000681	36.7
tig00001_193	CDD:224098	19.205	151	116	3	28	172	67	217	0.001	36.4
tig00001_193	CDD:224099	17.822	202	154	5	22	211	328	529	0.002	36.1
tig00001_194	CDD:224646	40.594	303	173	6	1	299	1	300	1.93e-115	332
tig00001_194	CDD:225024	18.612	317	209	19	1	299	1	286	3.01e-05	41.9
tig00001_195	CDD:224095	56.436	202	88	0	3	204	15	216	7.61e-74	220
tig00001_195	CDD:223673	35.673	171	109	1	35	204	82	252	1.82e-25	96.9
tig00001_195	CDD:226644	36.496	137	87	0	35	171	113	249	1.24e-24	95.4
tig00001_195	CDD:224922	28.125	192	122	5	7	182	8	199	2.38e-15	69.1
tig00001_195	CDD:226165	22.995	187	139	2	4	186	80	265	1.63e-14	67.7
tig00001_195	CDD:223654	29.752	121	72	4	35	142	88	208	1.75e-08	50.3
tig00001_195	CDD:224098	19.728	147	109	4	35	172	86	232	2.76e-06	43.7
tig00001_195	CDD:223629	29.508	61	43	0	82	142	143	203	7.82e-06	42.6
tig00001_195	CDD:224099	20.732	82	64	1	79	159	140	221	3.65e-05	40.7
tig00001_195	CDD:227319	21.569	153	115	3	35	183	338	489	6.68e-05	40.2
tig00001_195	CDD:224097	31.646	79	46	4	80	156	154	226	0.00017	38.4
tig00001_195	CDD:223646	26.263	99	68	1	49	142	131	229	0.000526	37.2
tig00001_195	CDD:224094	22.807	114	83	2	49	159	119	230	0.000667	36.9
tig00001_195	CDD:226629	27.419	62	45	0	81	142	93	154	0.004	34.1
tig00001_196	CDD:224050	49.18	366	128	4	1	365	1	309	3.23e-154	434
tig00001_196	CDD:226643	37.5	392	199	9	2	363	5	380	1.35e-100	301
tig00001_196	CDD:226361	38.158	304	173	9	1	297	5	300	4.38e-92	278
tig00001_196	CDD:224041	42.661	218	116	4	1	216	3	213	1.86e-85	257
tig00001_196	CDD:226359	41.667	240	130	4	1	237	3	235	6.8e-78	241
tig00001_196	CDD:224051	40.517	232	133	5	1	230	2	230	1.85e-77	236
tig00001_196	CDD:224054	30.249	281	194	2	1	281	4	282	7.41e-77	236
tig00001_196	CDD:224058	37.398	246	146	3	1	239	1	245	1.81e-75	234
tig00001_196	CDD:224059	41.629	221	121	3	1	214	1	220	8.09e-72	221
tig00001_196	CDD:224043	39.256	242	140	5	1	238	2	240	1.37e-70	222
tig00001_196	CDD:224048	33.858	254	151	4	1	238	280	532	6.41e-68	221
tig00001_196	CDD:224048	31.022	274	174	6	1	259	5	278	9.06e-55	186
tig00001_196	CDD:224047	36.91	233	136	4	1	227	3	230	7.86e-63	199
tig00001_196	CDD:224042	34.694	245	146	6	2	236	8	248	9.97e-63	199
tig00001_196	CDD:224045	33.772	228	145	3	1	224	2	227	5.05e-61	195
tig00001_196	CDD:224049	33.607	244	150	5	1	236	3	242	7.39e-61	194
tig00001_196	CDD:224052	34.649	228	144	3	1	224	8	234	2.78e-60	193
tig00001_196	CDD:223521	32.389	247	151	6	6	236	8	254	4e-59	192
tig00001_196	CDD:226905	35.193	233	142	5	1	230	3	229	1.88e-57	185
tig00001_196	CDD:226164	37.229	231	132	4	1	220	3	231	9.49e-56	181
tig00001_196	CDD:225438	35.556	225	140	3	1	222	1	223	2.32e-55	179
tig00001_196	CDD:226967	34.016	244	116	2	1	236	4	210	1.71e-54	178
tig00001_196	CDD:226927	32.479	234	155	3	1	234	1	231	7.5e-52	170
tig00001_196	CDD:224046	32.051	234	144	8	1	227	4	229	1.5e-46	157
tig00001_196	CDD:223488	31.95	241	149	4	1	228	4	242	1.8e-46	156
tig00001_196	CDD:224055	37.229	231	133	6	2	226	329	553	9.32e-46	162
tig00001_196	CDD:226961	34	250	148	6	2	237	7	253	2.98e-44	151
tig00001_196	CDD:225183	33.333	231	139	6	2	224	472	695	5.18e-44	159
tig00001_196	CDD:227321	30.87	230	148	6	2	226	321	544	1.41e-43	156
tig00001_196	CDD:226641	33.188	229	145	4	16	237	301	528	3.71e-43	155
tig00001_196	CDD:226641	33.065	248	146	6	13	246	21	262	3.12e-39	144
tig00001_196	CDD:226635	34.685	222	135	5	2	216	3	221	1.05e-42	146
tig00001_196	CDD:226628	32.663	199	121	5	35	228	31	221	3.98e-42	148
tig00001_196	CDD:226631	30.667	225	149	4	1	225	2	219	7.75e-42	146
tig00001_196	CDD:224053	29.545	220	147	5	1	215	8	224	1.61e-41	149
tig00001_196	CDD:224053	28.634	227	138	7	13	223	270	488	1.99e-29	116
tig00001_196	CDD:226360	35.407	209	129	5	22	228	19	223	3.37e-41	142
tig00001_196	CDD:223487	30.252	238	161	4	1	237	3	236	4e-41	142
tig00001_196	CDD:226647	33.484	221	138	5	2	215	7	225	1.91e-40	140
tig00001_196	CDD:226364	29.73	259	173	6	2	256	5	258	2.27e-39	143
tig00001_196	CDD:226364	25.328	229	150	6	3	215	259	482	4.21e-18	83
tig00001_196	CDD:227320	28.8	250	147	9	2	236	337	570	1.02e-38	143
tig00001_196	CDD:224060	34.468	235	138	9	1	227	4	230	2.02e-37	132
tig00001_196	CDD:226963	33.48	227	145	4	1	224	1	224	4.16e-36	129
tig00001_196	CDD:226637	27.935	247	167	4	1	236	4	250	6.48e-36	129
tig00001_196	CDD:226970	25.926	216	154	3	13	228	14	223	1.06e-34	124
tig00001_196	CDD:224044	25.652	230	150	7	1	216	31	253	3.01e-34	124
tig00001_196	CDD:226969	29.075	227	136	6	13	226	347	561	1.95e-32	125
tig00001_196	CDD:224057	25.6	250	147	6	1	226	3	237	3.75e-32	118
tig00001_196	CDD:224026	28.384	229	151	4	1	216	1	229	4.56e-31	116
tig00001_196	CDD:226620	28.218	202	137	6	1	199	2	198	7.83e-30	111
tig00001_196	CDD:226929	24.715	263	155	8	1	231	1	252	7.43e-29	110
tig00001_196	CDD:226952	24.074	270	188	7	17	283	39	294	2.14e-28	110
tig00001_196	CDD:226592	29.508	244	152	7	1	227	6	246	5.38e-28	107
tig00001_196	CDD:223562	24.664	223	124	5	1	195	3	209	4.43e-26	106
tig00001_196	CDD:223562	23.394	218	146	5	1	218	321	517	1.79e-25	105
tig00001_196	CDD:227118	29.13	230	138	9	1	211	4	227	2.16e-25	100
tig00001_196	CDD:227590	27.511	229	158	4	2	226	263	487	8.02e-25	102
tig00001_196	CDD:226968	28.761	226	145	6	2	224	323	535	1.96e-23	99.1
tig00001_196	CDD:227019	28.505	214	138	6	13	215	16	225	2.76e-22	92
tig00001_196	CDD:226617	25.128	195	139	5	1	195	2	189	1.38e-19	83.5
tig00001_196	CDD:223473	27.826	230	143	11	1	215	3	224	2.98e-17	77.6
tig00001_196	CDD:226646	26.633	199	123	5	1	194	392	572	1.58e-16	78.1
tig00001_196	CDD:226639	22.925	253	173	7	2	236	11	259	1.83e-16	76.8
tig00001_196	CDD:226622	26.57	207	137	7	28	227	25	223	5.09e-16	74.1
tig00001_196	CDD:225148	20.385	260	157	11	141	387	46	268	1.12e-14	72.3
tig00001_196	CDD:225457	29.921	127	80	3	244	365	144	266	2.39e-11	62
tig00001_196	CDD:224166	23.629	237	157	7	1	235	342	556	1.26e-10	60
tig00001_196	CDD:224166	26.882	186	95	10	34	196	106	273	2.52e-09	55.8
tig00001_196	CDD:225265	23.944	213	122	9	3	197	379	569	1.43e-10	59.9
tig00001_196	CDD:223591	27.966	118	78	4	251	362	1	117	2.29e-09	52.1
tig00001_196	CDD:223591	36.842	57	35	1	311	367	1	56	0.00076	36.3
tig00001_196	CDD:225979	25	124	83	1	253	366	249	372	3.88e-09	54.8
tig00001_196	CDD:225321	27.5	120	83	3	249	365	172	290	7.26e-08	50.4
tig00001_196	CDD:225321	33.333	54	35	1	243	296	229	281	5.09e-05	41.6
tig00001_196	CDD:223496	24.691	81	50	3	136	206	816	895	6.72e-06	45.1
tig00001_196	CDD:223256	25.568	176	110	7	60	227	417	579	3.95e-05	42.6
tig00001_196	CDD:226594	20.721	111	83	3	251	358	190	298	0.000106	41.2
tig00001_196	CDD:224173	25.532	141	94	6	247	381	204	339	0.000701	38.4
tig00001_196	CDD:226147	22.581	124	88	4	241	359	57	177	0.002	35.9
tig00001_197	CDD:223879	63.265	343	119	4	4	342	3	342	0	577
tig00001_198	CDD:223550	42.034	885	486	14	8	869	30	910	0	877
tig00001_198	CDD:225127	29.088	636	346	19	65	698	158	690	5.88e-77	262
tig00001_198	CDD:225126	27.642	615	334	22	64	659	43	565	8.73e-44	166
tig00001_198	CDD:226572	23.958	96	71	2	561	654	52	147	8.09e-05	41
tig00001_198	CDD:223620	19.159	214	150	6	448	657	25	219	0.005	36.3
tig00001_199	CDD:227810	26.014	296	120	5	3	230	2	266	2.52e-20	84.1
tig00001_200	CDD:223420	58.602	372	154	0	10	381	1	372	0	637
tig00001_201	CDD:224775	34.884	86	54	2	1	85	6	90	2.1e-26	91.2
tig00001_202	CDD:224371	45.232	409	188	8	459	863	1	377	1.56e-168	490
tig00001_202	CDD:223944	21.973	446	326	10	19	453	38	472	3.15e-67	229
tig00001_202	CDD:224890	24.304	395	237	14	462	835	6	359	1.2e-38	145
tig00001_202	CDD:223448	19.281	306	187	15	459	742	2	269	2.48e-11	63
tig00001_202	CDD:223093	23.308	266	157	12	15	249	1	250	5.29e-09	56
tig00001_203	CDD:226678	41.62	358	190	9	21	367	4	353	7.59e-120	348
tig00001_204	CDD:224553	35.314	303	190	5	41	339	28	328	4.54e-101	298
tig00001_204	CDD:227009	20.468	342	214	17	29	338	25	340	1.15e-10	59
tig00001_205	CDD:225632	39.333	150	90	1	3	152	10	158	2.09e-35	118
tig00001_205	CDD:227011	20.395	152	111	5	3	146	9	158	2.67e-06	42.3
tig00001_206	CDD:224509	46.174	379	203	1	52	430	1	378	1.07e-107	320
tig00001_206	CDD:227010	25.293	427	302	7	20	431	22	446	4.71e-31	120
tig00001_206	CDD:227012	23.739	337	243	6	67	392	195	528	1.22e-08	53.8
tig00001_207	CDD:224007	23.715	253	166	7	16	259	16	250	5.63e-21	86.8
tig00001_207	CDD:226150	22.564	195	102	12	82	254	87	254	0.005	34.7
tig00001_208	CDD:225117	40.196	102	60	1	183	283	20	121	1.67e-26	98.4
tig00001_208	CDD:227311	31.818	110	74	1	182	290	219	328	7.82e-17	76.5
tig00001_208	CDD:227095	30	120	83	1	165	283	354	473	6.75e-16	74.7
tig00001_208	CDD:225080	27.523	109	78	1	175	283	74	181	1.97e-14	67.4
tig00001_208	CDD:224829	21.918	73	56	1	36	107	59	131	6.08e-07	44.9
tig00001_208	CDD:223734	30.233	43	30	0	36	78	53	95	4.4e-06	42.4
tig00001_209	CDD:225117	29.808	104	73	0	186	289	19	122	2.21e-19	79.1
tig00001_209	CDD:227095	28.889	135	92	1	157	287	338	472	3.95e-16	75.1
tig00001_209	CDD:227311	27.66	94	68	0	194	287	227	320	3.83e-10	56.5
tig00001_209	CDD:225080	17.857	140	107	3	154	287	43	180	4.05e-07	46.6
tig00001_210	CDD:223996	27.066	484	330	13	1	470	2	476	1.52e-105	321
tig00001_210	CDD:223628	23.821	424	257	24	89	478	93	484	1.95e-08	53.4
tig00001_210	CDD:223995	18.13	524	351	29	5	471	5	507	0.001	38.5
tig00001_211	CDD:227143	58.753	417	172	0	2	418	3	419	0	765
tig00001_211	CDD:227288	23.844	411	239	21	4	386	21	385	2.72e-09	55.7
tig00001_212	CDD:223313	28.514	249	127	7	13	259	10	209	1.61e-42	142
tig00001_213	CDD:225793	54.808	104	46	1	1	103	1	104	2.8e-41	128
tig00001_214	CDD:224371	42.82	383	210	3	3	383	2	377	2.61e-152	432
tig00001_214	CDD:224890	24.685	397	264	15	1	379	1	380	2.68e-33	125
tig00001_214	CDD:223448	21.921	406	233	18	1	378	1	350	1.39e-16	77.3
tig00001_215	CDD:224332	36.585	246	152	4	9	251	1	245	1e-65	201
tig00001_216	CDD:223871	45.794	214	110	3	1	211	1	211	9.72e-77	227
tig00001_217	CDD:223598	28.783	337	199	13	3	327	1	308	4.57e-46	156
tig00001_217	CDD:224030	30.159	63	36	2	249	307	225	283	7.36e-06	44.1
tig00001_218	CDD:226240	56.631	279	118	2	4	280	1	278	2.58e-160	444
tig00001_218	CDD:223734	25	60	44	1	58	117	39	97	0.004	33.5
tig00001_219	CDD:223959	40.154	259	141	7	9	261	1	251	2.49e-69	211
tig00001_219	CDD:226674	32.099	243	155	5	8	250	1	233	4.31e-40	136
tig00001_219	CDD:223377	28.125	192	137	1	8	198	1	192	8.38e-36	125
tig00001_219	CDD:223696	25.714	280	149	11	8	259	1	249	2.23e-24	95.7
tig00001_219	CDD:226476	24.852	169	117	3	10	174	2	164	5.82e-19	80.6
tig00001_219	CDD:224011	26.214	103	65	4	11	109	248	343	4.76e-05	41.5
tig00001_219	CDD:223528	20.792	101	67	2	17	117	4	91	0.006	34.5
tig00001_220	CDD:224223	32.676	355	212	10	2	335	12	360	1.7e-79	244
tig00001_220	CDD:223147	52	25	12	0	251	275	377	401	0.002	36.5
tig00001_221	CDD:224493	32.092	349	186	9	2	348	1	300	9.9e-69	215
tig00001_221	CDD:226407	21.636	379	231	16	1	359	1	333	4.42e-16	75.3
tig00001_221	CDD:223231	22.016	377	192	20	4	328	26	352	4.53e-08	51.2
tig00001_221	CDD:223161	20.859	163	91	7	116	276	91	217	1.12e-06	46.4
tig00001_221	CDD:225325	24.444	225	130	12	116	328	103	299	2.57e-05	42.4
tig00001_221	CDD:224599	29.67	91	53	3	83	171	60	141	3.4e-05	41.9
tig00001_221	CDD:224742	29.87	77	48	3	95	171	69	139	0.00043	38.5
tig00001_221	CDD:225941	23.729	118	70	5	92	204	82	184	0.005	35.4
tig00001_222	CDD:225941	47.604	313	161	3	3	314	5	315	2.96e-116	336
tig00001_223	CDD:224493	36.129	310	191	3	5	310	1	307	2.31e-73	225
tig00001_223	CDD:223231	19.495	277	171	11	75	305	103	373	1.17e-11	61.9
tig00001_223	CDD:225325	28.926	121	83	2	181	299	195	314	1.43e-08	52.4
tig00001_223	CDD:223161	22.672	247	138	8	74	299	65	279	1.27e-05	43
tig00001_224	CDD:224345	49.765	213	103	3	1	212	6	215	4.48e-86	251
tig00001_224	CDD:223203	22.458	236	119	11	2	210	6	204	0.002	35.3
tig00001_225	CDD:223671	29.054	296	203	6	9	301	30	321	7.53e-50	165
tig00001_225	CDD:223626	27.273	99	63	4	131	227	2	93	0.009	34.2
tig00001_226	CDD:224276	16.77	161	131	1	21	178	76	236	3.97e-10	54.9
tig00001_226	CDD:224276	17.553	188	145	3	27	210	41	222	9.16e-10	53.7
tig00001_226	CDD:224276	18.072	83	67	1	92	173	26	108	0.003	34.9
tig00001_227	CDD:223367	58.721	172	71	0	1	172	4	175	1.89e-91	261
tig00001_228	CDD:223368	46.154	65	35	0	1	65	1	65	9.77e-16	61.5
tig00001_229	CDD:223369	67.797	118	38	0	1	118	1	118	1.67e-63	186
tig00001_230	CDD:224397	14.876	121	93	3	111	223	306	424	0.002	37
tig00001_231	CDD:223223	27.379	599	354	21	5	562	3	561	1.14e-65	226
tig00001_231	CDD:223996	21.429	84	57	2	7	81	7	90	0.000135	42
tig00001_231	CDD:224835	22.4	125	82	6	7	127	138	251	0.002	37.7
tig00001_233	CDD:224715	28.241	216	154	1	5	220	16	230	3.78e-42	140
tig00001_233	CDD:225097	23.318	223	145	5	6	206	11	229	2.1e-19	80.9
tig00001_233	CDD:225099	33.75	80	50	2	8	84	10	89	4.32e-07	46.1
tig00001_233	CDD:224089	20.455	88	69	1	5	91	4	91	3.17e-05	41.2
tig00001_233	CDD:224639	25.714	105	73	3	8	111	14	114	0.000212	36.9
tig00001_235	CDD:223894	31.092	119	80	1	13	131	14	130	3.51e-30	103
tig00001_236	CDD:223141	36.667	270	161	6	8	270	16	282	7.15e-82	245
tig00001_236	CDD:223428	23.81	231	136	14	26	227	5	224	0.002	35.6
tig00001_237	CDD:223697	26.176	489	261	16	3	472	1	408	5.56e-76	241
tig00001_238	CDD:224136	17.201	343	237	8	6	308	55	390	7.02e-15	71.9
tig00001_238	CDD:223539	20.611	262	188	6	6	259	4	253	3.53e-14	69
tig00001_238	CDD:224137	15.862	290	209	10	6	266	4	287	0.000729	37.5
tig00001_239	CDD:227871	36.842	95	60	0	14	108	6	100	2.01e-26	91.8
tig00001_240	CDD:224282	41.011	356	206	4	3	356	2	355	2.09e-148	420
tig00001_240	CDD:225106	22.293	157	95	7	114	255	88	232	0.006	35.4
tig00001_241	CDD:223600	28.571	91	61	3	20	106	36	126	6.34e-12	54.9
tig00001_241	CDD:225660	25.806	62	45	1	20	80	47	108	1.31e-05	39.3
tig00001_241	CDD:226685	20	75	51	4	16	81	473	547	0.000144	36.6
tig00001_242	CDD:223662	31.169	154	101	2	1	149	1	154	1.04e-32	110
tig00001_243	CDD:223151	41.667	108	59	3	93	199	19	123	2.56e-30	105
tig00001_243	CDD:226787	51.724	29	12	1	16	44	166	192	0.005	33.8
tig00001_244	CDD:223343	39.003	341	174	6	75	415	33	339	1.09e-85	262
tig00001_244	CDD:226011	30	90	60	3	330	418	113	200	3.61e-07	48.6
tig00001_244	CDD:223864	36.364	88	51	3	338	422	104	189	2.07e-06	46.6
tig00001_245	CDD:224492	51.572	159	73	2	1	159	1	155	1.18e-74	217
tig00001_246	CDD:224872	21.074	242	166	10	46	283	1	221	8.49e-20	84.5
tig00001_251	CDD:226783	19.186	172	116	6	8	173	11	165	2.02e-08	48.4
tig00001_256	CDD:225497	20.889	225	140	10	6	205	42	253	5.08e-09	53.2
tig00001_260	CDD:224872	20.635	189	136	6	1	187	1	177	1.35e-16	75.6
tig00001_260	CDD:227278	21.687	83	57	3	316	393	159	238	0.009	35.1
tig00001_261	CDD:224872	34.634	205	116	7	7	210	1	188	2.64e-32	121
tig00001_261	CDD:224117	25	112	84	0	383	494	733	844	0.003	37.8
tig00001_262	CDD:223931	33.333	72	47	1	50	120	211	282	1.11e-05	44.5
tig00001_262	CDD:223813	26.087	69	45	3	55	121	37	101	0.000198	39.5
tig00001_262	CDD:224780	31.944	72	39	5	54	121	44	109	0.003	37.3
tig00001_263	CDD:223931	26.199	271	168	6	1	253	12	268	8.88e-31	113
tig00001_263	CDD:223813	23.958	96	56	4	17	109	106	187	0.000766	36.4
tig00001_263	CDD:223813	24.138	58	43	1	200	256	36	93	0.009	33.4
tig00001_263	CDD:225319	26.087	69	27	2	6	66	187	239	0.002	36.3
tig00001_263	CDD:225100	45.455	44	24	0	190	233	436	479	0.004	35.2
tig00001_264	CDD:223989	28.03	396	256	10	136	512	29	414	4.08e-75	250
tig00001_264	CDD:226581	25.849	383	238	12	148	488	170	548	3.02e-45	173
tig00001_264	CDD:224036	20.522	268	171	14	163	412	29	272	1.88e-09	58.1
tig00001_264	CDD:227226	21.696	401	221	14	165	477	182	577	1.31e-08	56
tig00001_264	CDD:223683	20.565	248	164	10	163	393	273	504	7.99e-08	53.2
tig00001_264	CDD:223587	15.493	142	118	1	368	507	261	402	2.08e-07	51.3
tig00001_264	CDD:224126	23.684	152	84	11	148	282	75	211	0.003	38.2
tig00001_266	CDD:223496	19.355	279	171	6	188	415	330	605	0.000422	40.1
tig00001_266	CDD:224117	18.378	185	134	3	229	412	676	844	0.004	37
tig00001_267	CDD:227144	36.31	168	93	4	1	168	1	154	3.36e-38	125
tig00001_269	CDD:224805	37.217	309	182	5	1	306	1	300	1.79e-103	302
tig00001_269	CDD:223318	26.667	150	80	5	1	136	2	135	1.64e-06	46
tig00001_269	CDD:223422	24.138	116	70	4	1	112	2	103	7.7e-05	40.6
tig00001_269	CDD:223364	24	100	63	3	1	98	4	92	0.000382	38.5
tig00001_269	CDD:223643	41.026	39	23	0	1	39	1	39	0.002	36.1
tig00001_269	CDD:223727	28.205	39	28	0	1	39	3	41	0.004	35.8
tig00001_270	CDD:226167	40.634	347	196	3	2	343	1	342	2.66e-71	223
tig00001_272	CDD:224678	43.165	139	72	3	1	132	4	142	5.68e-47	145
tig00001_272	CDD:224679	18.349	109	83	4	29	133	28	134	6.32e-08	45.5
tig00001_274	CDD:223804	20	155	122	2	23	175	203	357	9.53e-10	53.9
tig00001_274	CDD:223804	21.687	166	125	2	20	185	3	163	0.000119	38.9
tig00001_275	CDD:227904	17.593	324	238	9	71	383	64	369	1.39e-08	54.4
tig00001_275	CDD:224206	15.831	379	271	14	39	388	55	414	0.002	37.8
tig00001_277	CDD:224228	24.074	108	78	1	1	104	3	110	2.4e-10	54.6
tig00001_278	CDD:224167	33.333	57	33	2	124	177	66	120	0.000467	36.1
tig00001_278	CDD:223532	29.688	64	39	2	123	180	91	154	0.004	33.8
tig00001_279	CDD:225127	42.314	579	311	5	56	617	138	710	0	597
tig00001_279	CDD:225126	30	470	269	14	121	550	104	553	2.51e-51	185
tig00001_279	CDD:223550	20.833	672	394	18	69	617	84	740	1.3e-47	176
tig00001_279	CDD:223634	29.63	108	54	4	444	530	78	184	1.26e-07	49.6
tig00001_279	CDD:226572	26.154	130	89	3	422	546	9	136	1.29e-05	42.5
tig00001_279	CDD:223620	21.667	180	106	5	401	546	29	207	0.002	37.4
tig00001_279	CDD:223635	28.571	63	44	1	496	557	194	256	0.009	35.5
tig00001_280	CDD:225328	25.352	71	53	0	1	71	1	71	2.83e-11	50.8
tig00001_280	CDD:225127	26.316	76	54	2	1	75	1	75	2.23e-08	46.1
tig00001_283	CDD:224287	17.647	629	429	19	426	1008	57	642	2.5e-21	96.7
tig00001_283	CDD:225105	21.212	132	97	5	742	867	324	454	0.004	37.7
tig00001_284	CDD:226159	55.897	390	170	2	9	396	15	404	1.1e-164	465
tig00001_284	CDD:224220	29.219	397	256	10	8	388	6	393	1.56e-50	172
tig00001_284	CDD:224736	23.798	416	260	16	9	380	29	431	3.1e-10	58.5
tig00001_286	CDD:223179	40.816	245	144	1	1	245	1	244	2.09e-105	303
tig00001_287	CDD:227904	21.981	323	223	12	9	311	2	315	2.57e-06	47.1
tig00001_287	CDD:226888	24.742	97	66	3	433	527	757	848	0.002	37.9
tig00001_288	CDD:224206	14.321	405	299	13	8	381	24	411	0.000105	42
tig00001_288	CDD:227904	15.808	291	228	8	67	351	67	346	0.000716	39.4
tig00001_289	CDD:227904	16.107	298	238	6	62	356	61	349	1.57e-06	47.8
tig00001_290	CDD:223303	52.941	153	72	0	95	247	6	158	1.86e-85	250
tig00001_291	CDD:223739	40.994	322	173	9	12	329	1	309	3.19e-105	308
tig00001_291	CDD:223729	25.625	320	171	12	12	325	2	260	1.16e-36	130
tig00001_291	CDD:227322	24.923	325	195	11	12	324	1	288	1.38e-30	114
tig00001_291	CDD:224370	24.695	328	183	16	12	324	1	279	4.66e-24	98.6
tig00001_292	CDD:225097	31.489	235	152	4	5	232	9	241	2.3e-47	154
tig00001_292	CDD:224715	26.724	232	152	4	1	230	11	226	4.83e-29	106
tig00001_292	CDD:225099	38.71	62	38	0	13	74	14	75	1.05e-15	70.8
tig00001_292	CDD:224089	29.07	86	56	2	13	93	7	92	3.45e-06	44.2
tig00001_292	CDD:224639	37.313	67	42	0	23	89	28	94	9.2e-05	38
tig00001_293	CDD:224372	36.659	431	261	4	1	430	1	420	6.61e-126	368
tig00001_294	CDD:225343	37.174	460	274	8	6	461	5	453	2.41e-145	420
tig00001_295	CDD:224357	59.615	104	40	1	3	106	1	102	8.79e-47	142
tig00001_296	CDD:224364	54.082	98	45	0	8	105	7	104	4.59e-39	123
tig00001_297	CDD:224372	45.775	426	215	6	1	413	1	423	1.78e-143	413
tig00001_298	CDD:224167	21.591	88	57	4	45	128	36	115	4.59e-05	38.5
tig00001_298	CDD:225695	29.545	44	30	1	85	128	81	123	0.003	33.4
tig00001_299	CDD:225679	31.111	45	20	2	24	68	104	137	0.000314	35.2
tig00001_300	CDD:223991	35.433	381	210	10	1	377	2	350	1.81e-103	306
tig00001_300	CDD:223990	28.212	397	227	14	3	377	6	366	2.13e-50	170
tig00001_300	CDD:223992	27.632	380	221	16	1	374	4	335	1.4e-49	167
tig00001_300	CDD:223677	25.693	397	204	22	1	377	1	326	1.42e-26	105
tig00001_300	CDD:225041	30.769	104	61	6	165	262	137	235	0.000284	39.6
tig00001_301	CDD:227060	33.916	572	318	17	6	564	25	549	8.02e-130	389
tig00001_303	CDD:227165	34.286	105	64	1	9	113	10	109	3.11e-10	50.9
tig00001_304	CDD:227165	36.842	95	59	1	20	113	11	105	3.75e-12	55.5
tig00001_305	CDD:226234	18.072	332	229	12	7	322	6	310	0.004	36.6
tig00001_306	CDD:223154	22.101	457	245	15	66	506	42	403	9.55e-45	162
tig00001_307	CDD:223605	18.962	443	344	7	13	454	20	448	1.27e-25	106
tig00001_307	CDD:223903	21.304	460	295	26	38	466	80	503	3.09e-10	59.2
tig00001_307	CDD:224038	21.525	446	289	17	42	466	52	457	1.1e-06	48
tig00001_308	CDD:224038	40.09	444	253	4	2	435	7	447	2.06e-132	386
tig00001_308	CDD:223903	36.061	391	237	5	2	382	38	425	7.83e-91	282
tig00001_308	CDD:223605	22.844	429	308	6	17	434	22	438	6.1e-29	115
tig00001_308	CDD:223884	23.504	234	169	7	5	234	4	231	0.000687	38.8
tig00001_309	CDD:223550	38.513	901	490	19	1	841	21	917	0	788
tig00001_309	CDD:225127	23.862	637	379	20	46	659	136	689	2.88e-74	254
tig00001_309	CDD:225126	24.953	537	308	18	117	635	109	568	3.74e-34	137
tig00001_309	CDD:226572	35.052	97	47	3	550	643	68	151	5.62e-08	49.9
tig00001_309	CDD:223635	20.741	135	90	4	512	630	126	259	0.000298	40.5
tig00001_310	CDD:226234	22.485	169	122	5	24	183	14	182	0.000459	39.3
tig00001_310	CDD:224268	41.463	41	24	0	16	56	6	46	0.001	37.6
tig00001_311	CDD:225197	31.897	116	62	4	2	116	1	100	4.97e-22	81.2
tig00001_312	CDD:223656	26.277	274	182	6	1	260	1	268	2.01e-42	144
tig00001_313	CDD:223408	32.753	287	178	5	1	273	2	287	2.79e-69	214
tig00001_313	CDD:225858	26.316	285	186	8	5	272	529	806	1.73e-15	74
tig00001_313	CDD:224666	36.842	38	23	1	62	98	30	67	0.002	35.9
tig00001_314	CDD:227016	22.868	258	146	14	144	378	170	397	3.11e-08	53.1
tig00001_314	CDD:224702	35.897	78	41	4	142	214	147	220	0.000105	40.7
tig00001_316	CDD:223848	28.509	228	132	9	3	215	54	265	3.74e-38	139
tig00001_316	CDD:227136	30	190	115	8	7	192	42	217	3.69e-16	78.4
tig00001_319	CDD:224681	30.142	282	174	9	14	275	8	286	2.73e-45	152
tig00001_320	CDD:226830	20.769	130	96	4	126	249	150	278	0.00018	39
tig00001_322	CDD:226234	21.181	491	340	12	1	490	2	446	2.87e-31	125
tig00001_322	CDD:224676	29.73	148	98	4	548	691	1	146	1.64e-30	114
tig00001_322	CDD:227014	29.452	146	90	5	552	692	2	139	1.22e-20	85.8
tig00001_323	CDD:225948	30.208	96	62	2	3	96	1	93	1.85e-15	63
tig00001_324	CDD:225579	35.281	445	270	7	1	429	5	447	1.26e-91	282
tig00001_326	CDD:223269	46.953	279	146	2	1	277	2	280	7.3e-102	296
tig00001_326	CDD:223896	29	100	50	6	83	174	13	99	0.01	34.2
tig00001_327	CDD:226986	25	124	84	3	6	128	5	120	3.28e-07	45.5
tig00001_327	CDD:223718	28.571	133	83	5	5	130	3	130	1.8e-05	40.5
tig00001_327	CDD:224025	41.667	36	20	1	1	35	3	38	0.007	33.4
tig00001_327	CDD:223645	26.042	96	52	4	2	87	7	93	0.009	33
tig00001_328	CDD:223979	35.252	139	83	4	58	192	1	136	7.58e-31	107
tig00001_328	CDD:223568	24.37	119	81	4	70	179	16	134	1.53e-07	46.4
tig00001_328	CDD:225373	34	50	31	1	74	121	151	200	9.68e-06	41.9
tig00001_329	CDD:224759	36.066	122	77	1	11	131	3	124	3.46e-19	75.3
tig00001_329	CDD:225891	33.333	36	24	0	41	76	39	74	0.000787	34.6
tig00001_329	CDD:224240	25.581	86	52	3	50	129	30	109	0.000837	34.6
tig00001_330	CDD:223532	28.302	159	105	3	3	160	11	161	7.34e-22	84.3
tig00001_330	CDD:224168	25.301	83	41	3	97	172	87	155	1.62e-06	43.1
tig00001_330	CDD:225695	19.653	173	115	4	1	172	1	150	5.53e-05	38.8
tig00001_330	CDD:225064	25.806	93	60	3	62	153	52	136	0.001	34.6
tig00001_330	CDD:224167	19.048	147	90	6	4	149	1	119	0.002	34.2
tig00001_330	CDD:223530	27.16	81	52	2	85	158	75	155	0.006	32.9
tig00001_330	CDD:225928	25.714	70	51	1	89	158	199	267	0.006	33.2
tig00001_330	CDD:225261	20.482	83	53	2	49	128	4	76	0.009	31.5
tig00001_331	CDD:225917	37.662	231	140	3	1	230	1	228	1.25e-72	218
tig00001_331	CDD:223150	37.097	62	33	2	87	146	97	154	0.003	35.7
tig00001_334	CDD:225161	49.425	435	218	2	1	434	2	435	4.49e-148	425
tig00001_334	CDD:223732	21.346	431	287	16	1	403	4	410	4.58e-14	71.2
tig00001_334	CDD:225142	19.273	275	200	7	95	361	100	360	0.001	37.6
tig00001_335	CDD:223443	43.629	518	247	13	9	506	1	493	4.31e-153	445
tig00001_335	CDD:223373	23.228	254	142	14	6	243	142	358	5.03e-11	62.3
tig00001_335	CDD:225819	29.333	150	86	6	37	168	25	172	3.04e-09	56.7
tig00001_335	CDD:224440	23.849	239	122	11	6	215	169	376	0.000599	39.6
tig00001_336	CDD:225343	41.02	490	245	12	6	489	4	455	0	522
tig00001_337	CDD:226234	21.705	387	276	9	3	379	2	371	1.16e-10	60.9
tig00001_337	CDD:224568	25	80	57	1	4	83	3	79	0.000413	36.5
tig00001_338	CDD:224183	29.521	376	238	6	120	468	2	377	1.12e-80	257
tig00001_338	CDD:225101	45.578	147	80	0	472	618	1	147	1.86e-61	198
tig00001_338	CDD:224184	45.679	81	43	1	32	111	2	82	4.84e-21	85
tig00001_338	CDD:224372	18.081	271	172	10	169	398	72	333	0.000167	41.4
tig00001_338	CDD:224218	21.285	249	130	13	241	454	101	318	0.008	35.6
tig00001_339	CDD:225343	43.558	489	238	9	1	484	1	456	0	632
tig00001_340	CDD:224759	29.921	127	83	2	20	143	3	126	8.25e-14	61.1
tig00001_340	CDD:224240	35.938	64	38	1	44	107	15	75	3.71e-07	43.9
tig00001_340	CDD:225222	28.421	95	62	3	44	132	16	110	6.32e-05	38.1
tig00001_340	CDD:224651	24.731	93	60	5	47	135	27	113	0.000105	37.7
tig00001_340	CDD:225310	30.612	49	31	3	44	90	200	247	0.003	33.6
tig00001_340	CDD:224258	25	56	42	0	50	105	16	71	0.009	32
tig00001_340	CDD:223768	23.256	86	44	3	64	143	154	223	0.01	32.3
tig00001_341	CDD:224814	37.047	359	213	8	6	357	8	360	4.62e-116	338
tig00001_341	CDD:223245	21.198	217	112	12	138	331	107	287	0.001	37.2
tig00001_342	CDD:223765	27.876	226	116	9	1	224	3	183	5.16e-30	107
tig00001_343	CDD:223523	25.352	426	291	12	3	412	1	415	1.61e-51	176
tig00001_343	CDD:224169	23.202	431	253	22	1	377	5	411	6.12e-30	118
tig00001_343	CDD:224172	22.15	307	192	13	1	271	4	299	6.27e-26	105
tig00001_343	CDD:224171	23.565	331	206	15	1	309	4	309	1.04e-21	95.1
tig00001_343	CDD:223566	20.069	289	192	10	3	272	6	274	2.09e-17	79.6
tig00001_343	CDD:224153	39.474	38	23	0	1	38	1	38	0.000122	41.2
tig00001_343	CDD:224070	27.473	91	54	3	116	194	99	189	0.000316	39.8
tig00001_343	CDD:223652	28.889	45	32	0	1	45	4	48	0.000602	38.8
tig00001_343	CDD:223567	31.915	47	30	1	140	184	123	169	0.003	36.9
tig00001_343	CDD:224127	45.714	35	19	0	138	172	1	35	0.006	35.8
tig00001_343	CDD:223643	30.233	43	30	0	141	183	1	43	0.007	34.9
tig00001_345	CDD:223628	64.859	498	174	1	1	498	1	497	0	891
tig00001_345	CDD:223996	26.772	508	343	13	6	498	5	498	3.09e-92	287
tig00001_345	CDD:223995	21.35	548	326	25	6	484	4	515	3.27e-31	123
tig00001_345	CDD:224835	25.61	82	56	3	368	448	311	388	0.004	36.2
tig00001_346	CDD:223651	35.333	600	314	14	7	600	1	532	4.49e-171	494
tig00001_346	CDD:223737	23.188	207	147	5	143	347	124	320	1.23e-11	63.8
tig00001_346	CDD:224070	26.829	82	44	3	196	261	436	517	0.000294	40.5
tig00001_346	CDD:223652	22.128	235	129	12	141	349	120	326	0.000844	39.2
tig00001_346	CDD:223717	25.676	74	46	2	161	234	86	150	0.003	37.1
tig00001_347	CDD:223653	45	240	129	3	1	238	1	239	1.08e-76	229
tig00001_348	CDD:224114	37.305	512	313	5	3	513	1	505	8.32e-125	383
tig00001_348	CDD:223327	24.843	479	316	14	86	540	359	817	5.49e-49	180
tig00001_349	CDD:223632	27.174	184	121	4	11	184	11	191	5.24e-20	80.1
tig00001_349	CDD:224104	25.749	167	105	5	7	163	4	161	3.39e-06	43
tig00001_350	CDD:224334	43.119	109	57	1	1	104	4	112	2.49e-28	96.2
tig00001_351	CDD:224848	37.037	81	49	1	6	84	9	89	1.58e-24	85.4
tig00001_352	CDD:223680	36.275	102	58	4	6	100	2	103	2.72e-26	91.2
tig00001_352	CDD:225450	28.696	115	48	6	14	96	160	272	1.47e-10	53.1
tig00001_352	CDD:223982	25	88	56	3	15	92	119	206	3.82e-05	38
tig00001_352	CDD:227436	38.298	47	22	1	7	46	240	286	0.000796	34.2
tig00001_353	CDD:223523	37.907	430	244	11	3	424	1	415	2.19e-91	283
tig00001_353	CDD:224169	33.908	348	191	14	81	415	115	436	1.14e-54	188
tig00001_353	CDD:224171	29.179	329	214	11	1	325	4	317	1.07e-50	183
tig00001_353	CDD:224172	29.586	338	197	11	1	311	4	327	1.1e-43	157
tig00001_353	CDD:224172	24.107	112	70	5	147	244	2	112	3.48e-07	49.6
tig00001_353	CDD:223566	20.588	306	200	14	2	289	5	285	1.04e-14	71.9
tig00001_353	CDD:223680	39.506	81	45	3	459	535	16	96	5.65e-14	65.3
tig00001_353	CDD:223567	24.419	258	130	16	101	311	207	446	9.13e-10	57.7
tig00001_353	CDD:224983	20.362	221	124	11	1	185	9	213	1.89e-08	53.6
tig00001_353	CDD:226160	29.697	165	90	8	149	301	355	505	1.19e-06	48.2
tig00001_353	CDD:223842	25.455	110	58	3	149	255	8	96	1.4e-06	47.7
tig00001_353	CDD:223652	19.149	282	146	12	1	259	4	226	1.6e-06	47.7
tig00001_353	CDD:224153	45.946	37	20	0	1	37	1	37	1.01e-05	45
tig00001_353	CDD:224992	38.298	47	27	1	196	240	118	164	3.94e-05	43
tig00001_353	CDD:225450	26.415	106	44	7	461	536	169	270	0.000205	40.4
tig00001_353	CDD:223727	45.714	35	19	0	148	182	2	36	0.000254	40.5
tig00001_353	CDD:223636	40.625	32	19	0	152	183	5	36	0.000374	40
tig00001_353	CDD:223643	21.053	114	59	4	149	255	1	90	0.00072	38.4
tig00001_353	CDD:224154	40	35	21	0	149	183	4	38	0.002	38.2
tig00001_353	CDD:223737	40.625	32	19	0	150	181	6	37	0.002	38
tig00001_353	CDD:224152	43.333	30	17	0	149	178	8	37	0.002	37.4
tig00001_353	CDD:223717	21.769	147	61	4	150	242	5	151	0.008	35.5
tig00001_354	CDD:226482	23.967	726	496	18	27	707	29	743	3.34e-78	262
tig00001_354	CDD:223288	22.901	131	92	4	505	628	214	342	8.23e-07	49.4
tig00001_354	CDD:223288	25.862	116	71	4	606	706	499	614	1.79e-05	44.8
tig00001_354	CDD:224000	23.899	159	90	9	505	650	379	519	0.000691	40.1
tig00001_355	CDD:225382	35.826	321	190	9	1	312	3	316	7.29e-58	186
tig00001_357	CDD:224136	26.869	428	292	11	10	421	2	424	4.44e-60	199
tig00001_357	CDD:223539	33.01	103	68	1	61	163	3	104	9.87e-18	80.5
tig00001_357	CDD:224137	24.434	221	152	7	60	269	2	218	1.87e-14	70.6
tig00001_357	CDD:225494	19.579	475	307	21	12	431	95	549	0.002	37.5
tig00001_358	CDD:224117	16.197	142	110	2	88	220	360	501	0.000877	37.8
tig00001_358	CDD:224117	15.789	152	110	3	87	221	254	404	0.008	34.7
tig00001_359	CDD:223470	48.113	106	55	0	1	106	1	106	2.28e-40	126
tig00001_360	CDD:225946	38.211	123	73	2	1	122	1	121	5.28e-28	97
tig00001_361	CDD:225251	48	325	164	4	10	333	1	321	3.97e-123	353
tig00001_362	CDD:225251	28.019	207	127	7	15	200	30	235	4.49e-41	138
tig00001_362	CDD:224378	18.421	114	91	2	2	114	4	116	0.004	34.6
tig00001_364	CDD:223736	32.227	211	135	3	11	214	5	214	4.71e-34	118
tig00001_364	CDD:224414	31.915	47	32	0	173	219	27	73	0.004	34.3
tig00001_364	CDD:224870	28.333	60	38	2	144	202	1	56	0.007	33.1
tig00001_364	CDD:224258	32	50	32	1	155	204	5	52	0.009	33.1
tig00001_365	CDD:226089	31.955	532	347	6	11	534	11	535	8.67e-111	337
tig00001_366	CDD:224054	32.89	301	186	6	1	293	1	293	3.75e-89	264
tig00001_366	CDD:226631	31.164	292	189	7	5	287	3	291	2.16e-62	196
tig00001_366	CDD:226927	34.071	226	143	3	4	223	1	226	7.75e-60	188
tig00001_366	CDD:224053	30.328	244	143	7	1	226	5	239	3.58e-44	154
tig00001_366	CDD:224053	27.004	237	131	10	2	211	261	482	4.23e-27	107
tig00001_366	CDD:224051	33.482	224	137	5	4	217	2	223	1.39e-43	146
tig00001_366	CDD:224050	34.529	223	137	4	4	217	1	223	8.85e-43	146
tig00001_366	CDD:224052	30	230	149	4	1	218	5	234	1.16e-41	141
tig00001_366	CDD:224041	33.184	223	127	9	2	211	1	214	3.73e-40	137
tig00001_366	CDD:224060	31.111	225	142	5	4	217	4	226	4.55e-40	137
tig00001_366	CDD:224048	33.198	247	129	12	1	217	2	242	5.91e-40	143
tig00001_366	CDD:224048	30.041	243	136	7	4	217	280	517	1.15e-36	134
tig00001_366	CDD:224046	29.565	230	144	8	1	217	1	225	2.4e-38	133
tig00001_366	CDD:226359	32.895	228	135	7	1	217	1	221	1.12e-37	133
tig00001_366	CDD:224045	29.583	240	142	8	4	225	2	232	1.96e-37	130
tig00001_366	CDD:224049	29.362	235	153	6	5	226	4	238	5.26e-37	129
tig00001_366	CDD:223487	28.511	235	142	6	2	219	1	226	2.3e-36	127
tig00001_366	CDD:226364	28.512	242	149	7	1	226	1	234	4.27e-36	132
tig00001_366	CDD:226364	34.211	228	126	7	18	225	272	495	2.7e-23	96.1
tig00001_366	CDD:223488	30.612	245	136	8	1	218	1	238	7.54e-36	126
tig00001_366	CDD:226361	24.889	225	159	6	1	217	2	224	4.09e-35	127
tig00001_366	CDD:224047	33.333	213	131	5	15	217	15	226	4.57e-35	123
tig00001_366	CDD:223521	32.143	252	122	15	4	217	1	241	5.6e-35	125
tig00001_366	CDD:224043	29.956	227	143	8	5	218	3	226	1.28e-34	125
tig00001_366	CDD:226952	27.797	295	187	10	17	293	37	323	1.89e-34	124
tig00001_366	CDD:224057	26.577	222	145	4	1	216	24	233	7.74e-33	118
tig00001_366	CDD:226967	27.35	234	116	6	1	217	1	197	5.86e-32	116
tig00001_366	CDD:224055	30.476	210	132	6	19	217	344	550	2e-29	114
tig00001_366	CDD:226164	26.068	234	152	7	4	217	3	235	5.03e-29	108
tig00001_366	CDD:224059	30	230	132	9	4	211	1	223	2.19e-28	106
tig00001_366	CDD:224058	29.762	252	156	8	5	238	7	255	3.2e-28	108
tig00001_366	CDD:226643	30.415	217	140	5	12	217	36	252	2.04e-27	106
tig00001_366	CDD:225183	30.374	214	127	8	20	218	489	695	5.31e-26	104
tig00001_366	CDD:227321	24.885	217	134	6	19	217	336	541	1.09e-25	103
tig00001_366	CDD:226641	29.839	248	132	11	4	217	6	245	1.15e-25	103
tig00001_366	CDD:226641	30.87	230	129	11	10	217	293	514	4.39e-24	98.9
tig00001_366	CDD:226961	26.068	234	147	6	7	217	9	239	1.43e-25	99.4
tig00001_366	CDD:227019	30.165	242	138	8	1	219	2	235	8.1e-25	97
tig00001_366	CDD:227320	26.267	217	132	6	19	217	353	559	2.24e-24	99.7
tig00001_366	CDD:224042	26.471	238	142	7	4	217	7	235	2.7e-24	95.7
tig00001_366	CDD:223562	23.744	219	144	9	4	216	321	522	3.97e-23	95.8
tig00001_366	CDD:223562	24.286	210	132	5	3	188	2	208	5.32e-18	80.8
tig00001_366	CDD:226929	28.033	239	152	7	4	226	1	235	7.12e-23	92
tig00001_366	CDD:226637	26.582	237	154	7	1	217	1	237	1.76e-22	91.4
tig00001_366	CDD:226968	29.577	213	130	6	23	226	342	543	3.25e-22	93.3
tig00001_366	CDD:226969	28.444	225	127	9	20	222	352	564	1.25e-21	91.6
tig00001_366	CDD:226635	24.895	237	147	5	5	219	3	230	1.44e-21	88.4
tig00001_366	CDD:226905	31.707	205	128	5	19	215	20	220	1.86e-21	88.3
tig00001_366	CDD:226970	26.667	210	136	7	20	219	19	220	1.96e-21	87.6
tig00001_366	CDD:225438	29.108	213	132	8	11	209	9	216	3.3e-21	86.9
tig00001_366	CDD:226628	28.384	229	123	9	10	216	6	215	7.35e-21	88.2
tig00001_366	CDD:224166	28.641	206	104	8	26	203	96	286	9.04e-21	89.3
tig00001_366	CDD:224166	33.129	163	88	6	4	162	342	487	1.52e-20	88.5
tig00001_366	CDD:226360	29.493	217	133	6	19	217	3	217	3.33e-20	84.3
tig00001_366	CDD:226963	27.826	230	143	7	4	217	1	223	5.29e-20	84.3
tig00001_366	CDD:223473	28.889	225	121	10	15	212	15	227	1.79e-19	82.6
tig00001_366	CDD:227590	26.484	219	137	8	15	217	274	484	1e-18	82.8
tig00001_366	CDD:226617	28.09	178	112	6	20	188	18	188	3.19e-18	78.5
tig00001_366	CDD:226647	29.956	227	139	8	2	211	4	227	8.61e-18	77.4
tig00001_366	CDD:226592	27.273	242	148	9	4	219	6	245	5e-16	73.2
tig00001_366	CDD:226622	25.926	216	131	9	20	217	15	219	8.99e-16	72.2
tig00001_366	CDD:224026	22.689	238	152	7	19	234	21	248	6.94e-15	70
tig00001_366	CDD:224044	23.077	234	156	9	1	214	28	257	1.05e-14	69.3
tig00001_366	CDD:226620	26.768	198	120	8	20	202	18	205	1.32e-13	65.6
tig00001_366	CDD:227118	24.123	228	145	6	1	203	1	225	1.46e-13	65.9
tig00001_366	CDD:226639	28.205	234	142	7	10	217	13	246	4.15e-12	62.6
tig00001_366	CDD:225265	21.608	199	144	6	19	211	398	590	1.09e-06	46.8
tig00001_366	CDD:223256	29.762	84	42	4	151	223	504	581	1.28e-05	43.3
tig00001_366	CDD:223256	27.381	84	44	4	151	223	846	923	0.002	36.4
tig00001_366	CDD:226646	35.294	34	22	0	20	53	409	442	0.002	36.5
tig00001_367	CDD:224228	21.081	185	142	2	1	185	3	183	7.37e-16	70
tig00001_367	CDD:225767	29.032	62	43	1	7	68	10	70	0.002	35.2
tig00001_368	CDD:223798	16.667	102	75	2	284	384	101	193	0.001	37.7
tig00001_369	CDD:223240	46.618	414	197	7	3	413	5	397	1.24e-156	445
tig00001_369	CDD:224108	30.189	53	33	2	364	413	16	67	0.000226	39.5
tig00001_369	CDD:223596	44.118	34	19	0	363	396	107	140	0.002	36.5
tig00001_370	CDD:223154	24.279	416	217	17	70	482	41	361	1.39e-45	165
tig00001_371	CDD:223605	18.913	460	355	7	1	459	9	451	2.07e-31	122
tig00001_371	CDD:224038	20.19	421	288	15	58	463	67	454	7.87e-08	51.5
tig00001_371	CDD:223903	19.438	463	314	24	37	472	80	510	4.96e-06	45.7
tig00001_372	CDD:224671	32.258	434	285	5	27	455	41	470	2.59e-75	241
tig00001_373	CDD:224525	34.808	339	208	4	3	335	1	332	1.31e-96	286
tig00001_373	CDD:224791	21.659	217	125	11	6	210	1	184	3.76e-07	48.2
tig00001_374	CDD:224928	29.305	331	189	13	14	333	10	306	2.62e-59	190
tig00001_375	CDD:223710	34.513	226	137	3	1	221	1	220	7.36e-59	182
tig00001_375	CDD:223620	30.57	193	123	5	1	189	3	188	1.76e-27	101
tig00001_375	CDD:223943	22.414	232	153	7	1	215	3	224	8.21e-18	76.1
tig00001_375	CDD:223720	23.396	265	142	14	1	215	7	260	0.002	35.6
tig00001_376	CDD:224471	45.828	779	395	10	3	761	1	772	0	929
tig00001_377	CDD:224183	28.478	460	237	12	2	447	1	382	2.25e-75	245
tig00001_377	CDD:225101	50.694	144	69	2	573	714	5	148	4.75e-56	185
tig00001_377	CDD:224184	40.698	86	50	1	469	553	1	86	1.75e-23	92
tig00001_378	CDD:226098	20.43	279	185	10	1	274	10	256	8.62e-31	112
tig00001_380	CDD:226287	25	212	139	5	22	233	10	201	2.23e-42	144
tig00001_381	CDD:223532	20.732	164	97	7	12	146	17	176	9.64e-10	51.5
tig00001_381	CDD:225928	24	125	82	4	7	122	138	258	2.3e-07	45.5
tig00001_381	CDD:224167	19.231	78	56	2	53	123	43	120	0.001	34.6
tig00001_381	CDD:227915	22.642	106	63	3	34	129	30	126	0.002	33.3
tig00001_382	CDD:226010	68.208	173	55	0	1	173	1	173	1.4e-104	294
tig00001_383	CDD:224609	27.82	133	96	0	1	133	4	136	7.38e-23	86.1
tig00001_384	CDD:223860	22.321	112	82	1	19	125	3	114	3.5e-08	46.7
tig00001_385	CDD:225371	23.125	160	123	0	18	177	13	172	4.64e-18	83
tig00001_385	CDD:225371	20.958	167	122	4	16	177	209	370	7.55e-05	41.8
tig00001_385	CDD:223809	21.678	143	105	2	28	167	27	165	4.49e-06	45.8
tig00001_385	CDD:223553	20.186	322	240	6	19	323	3	324	9.67e-06	44.7
tig00001_385	CDD:225365	22.973	148	108	3	19	162	9	154	0.000233	40.3
tig00001_385	CDD:225180	20.667	150	99	5	37	175	48	188	0.000442	39.6
tig00001_385	CDD:225121	18.378	185	135	5	210	380	163	345	0.009	35.3
tig00001_389	CDD:223241	54.737	190	83	2	7	194	1	189	1.65e-98	280
tig00001_389	CDD:223967	24.121	199	113	10	1	173	1	187	3.16e-07	45.5
tig00001_389	CDD:223529	22.642	159	101	7	8	156	4	150	6.84e-06	42.7
tig00001_390	CDD:223121	27.885	520	291	24	7	491	5	475	1.97e-75	242
tig00001_392	CDD:224059	50.226	221	106	3	1	218	1	220	2.55e-101	309
tig00001_392	CDD:224051	40.724	221	122	5	1	219	2	215	1.32e-76	244
tig00001_392	CDD:224041	37.872	235	129	4	1	231	3	224	3.49e-70	227
tig00001_392	CDD:226361	39.189	222	122	6	1	219	5	216	5.15e-66	220
tig00001_392	CDD:224058	39.189	222	131	3	1	219	1	221	2.29e-62	210
tig00001_392	CDD:226164	39.827	231	125	4	1	221	3	229	2.04e-61	204
tig00001_392	CDD:226647	39.462	223	132	2	2	222	7	228	8.33e-61	201
tig00001_392	CDD:225438	36.889	225	137	3	1	224	1	221	2.44e-60	200
tig00001_392	CDD:226359	35.622	233	133	5	1	231	3	220	3.76e-59	201
tig00001_392	CDD:224047	36.842	228	133	5	1	224	3	223	2.07e-57	192
tig00001_392	CDD:224054	37.004	227	133	4	1	225	4	222	3.63e-57	194
tig00001_392	CDD:224050	40.175	229	123	5	1	224	1	220	1.48e-56	193
tig00001_392	CDD:223521	33.617	235	136	6	1	218	1	232	2.02e-53	185
tig00001_392	CDD:224043	37.054	224	126	5	1	218	2	216	2.27e-52	182
tig00001_392	CDD:224048	31.169	231	144	8	1	218	280	508	3.53e-51	184
tig00001_392	CDD:224048	33.19	232	138	6	1	218	5	233	2.15e-50	182
tig00001_392	CDD:224049	32.444	225	144	7	1	221	3	223	9e-51	175
tig00001_392	CDD:226360	37.273	220	124	5	1	218	1	208	1.57e-50	174
tig00001_392	CDD:224045	35.714	224	130	4	1	218	2	217	4.85e-50	173
tig00001_392	CDD:226961	36.404	228	130	4	2	218	7	230	6.62e-49	170
tig00001_392	CDD:226643	38.424	203	119	2	20	218	43	243	3.85e-48	172
tig00001_392	CDD:224046	33.79	219	125	6	1	211	4	210	4.41e-48	168
tig00001_392	CDD:226635	36.82	239	140	6	2	234	3	236	6.33e-48	167
tig00001_392	CDD:224052	34.956	226	136	7	1	221	8	227	1.43e-47	166
tig00001_392	CDD:224042	32.927	246	142	9	2	231	8	246	2.15e-47	166
tig00001_392	CDD:226905	41.176	204	107	4	20	219	20	214	3.21e-47	165
tig00001_392	CDD:226967	30.531	226	108	4	1	218	4	188	1.93e-46	163
tig00001_392	CDD:223488	30.29	241	143	6	1	225	4	235	4.65e-44	156
tig00001_392	CDD:226641	33.333	234	137	7	1	218	6	236	8.07e-41	154
tig00001_392	CDD:226641	30.144	209	133	7	19	218	301	505	1.33e-29	121
tig00001_392	CDD:227321	30.317	221	132	5	14	224	330	538	6.89e-40	152
tig00001_392	CDD:227320	31.532	222	123	7	18	225	351	557	1.03e-38	149
tig00001_392	CDD:224053	33.929	224	134	8	1	218	8	223	1.99e-38	147
tig00001_392	CDD:224053	28.704	216	139	9	14	218	268	479	4.94e-25	106
tig00001_392	CDD:226927	31.6	250	159	5	1	249	1	239	1.75e-37	137
tig00001_392	CDD:226970	32.287	223	133	8	1	218	3	212	1.32e-34	128
tig00001_392	CDD:226628	32.258	186	118	3	35	218	28	207	1.6e-34	132
tig00001_392	CDD:226929	33.486	218	122	5	21	224	17	225	4.94e-34	128
tig00001_392	CDD:225183	31.197	234	135	9	2	223	472	691	3.48e-33	133
tig00001_392	CDD:224026	32.906	234	140	8	1	221	1	230	4.07e-33	125
tig00001_392	CDD:226364	30.841	214	135	8	2	210	5	210	1.06e-31	126
tig00001_392	CDD:226364	25.806	217	137	6	19	218	272	481	5.65e-17	81.4
tig00001_392	CDD:224055	32.42	219	125	7	18	225	342	548	1.07e-31	127
tig00001_392	CDD:223487	29.68	219	134	7	1	215	3	205	8.33e-31	118
tig00001_392	CDD:227019	30.189	212	132	6	19	219	19	225	4.24e-30	116
tig00001_392	CDD:226637	28.27	237	153	7	1	225	4	235	4.67e-28	111
tig00001_392	CDD:226963	29.596	223	145	4	1	219	1	215	5.01e-28	110
tig00001_392	CDD:223562	27.397	219	129	8	1	216	321	512	3.74e-27	113
tig00001_392	CDD:223562	27.197	239	140	7	1	218	3	228	4.86e-24	103
tig00001_392	CDD:224060	29.075	227	151	4	1	224	4	223	4.33e-27	107
tig00001_392	CDD:224044	25.105	239	142	8	1	219	31	252	5.43e-27	107
tig00001_392	CDD:226620	31.148	183	120	4	21	201	18	196	6.09e-27	106
tig00001_392	CDD:227118	29.646	226	144	9	1	214	4	226	6.62e-26	104
tig00001_392	CDD:226631	25.688	218	149	3	1	217	2	207	1.72e-25	104
tig00001_392	CDD:224057	28.169	213	134	5	7	218	31	225	4.63e-25	101
tig00001_392	CDD:226639	27.586	261	141	12	1	225	3	251	1.36e-22	96.8
tig00001_392	CDD:226617	26.596	188	115	4	21	200	18	190	2.27e-22	93.1
tig00001_392	CDD:226646	28.713	202	115	7	21	215	409	588	1.49e-20	93.5
tig00001_392	CDD:223650	25.106	235	171	3	549	778	185	419	9.6e-20	89.4
tig00001_392	CDD:223473	25.106	235	161	9	1	226	3	231	7.71e-19	83.8
tig00001_392	CDD:226592	28.926	242	141	8	1	221	6	237	1.86e-18	82.9
tig00001_392	CDD:225265	27.411	197	124	4	20	211	398	580	5.72e-18	85.3
tig00001_392	CDD:224166	30.556	180	99	8	34	198	103	271	9.42e-18	84.3
tig00001_392	CDD:224166	25.837	209	116	8	18	214	349	530	6.39e-17	82
tig00001_392	CDD:226969	27.397	219	117	8	21	218	352	549	1.32e-17	83.9
tig00001_392	CDD:226952	26.147	218	153	3	7	221	26	238	8.78e-17	79.4
tig00001_392	CDD:226957	30.282	142	83	3	646	778	274	408	1.59e-16	79.6
tig00001_392	CDD:227590	31.068	206	125	8	21	218	279	475	9.47e-16	77.8
tig00001_392	CDD:226622	22.881	236	138	9	1	219	3	211	1.03e-13	68.7
tig00001_392	CDD:226968	24.402	209	120	9	24	218	342	526	2.77e-11	63.7
tig00001_392	CDD:223496	32.099	81	45	4	141	212	815	894	1.38e-07	52.1
tig00001_392	CDD:225669	17.241	145	113	1	633	777	691	828	3.63e-06	47.4
tig00001_392	CDD:225088	20.321	187	124	7	577	757	104	271	6.06e-06	45.7
tig00001_392	CDD:226984	25.472	106	70	2	142	245	271	369	0.000194	41.3
tig00001_392	CDD:223256	33.333	75	45	3	142	212	823	896	0.000832	39.9
tig00001_392	CDD:223571	28.571	70	38	4	142	203	432	497	0.007	36.4
tig00001_393	CDD:223816	40.179	224	126	4	3	219	2	224	4.43e-70	211
tig00001_393	CDD:225114	38.843	121	74	0	1	121	4	124	6.73e-33	120
tig00001_393	CDD:223855	41.935	124	69	3	3	123	7	130	5.67e-30	105
tig00001_393	CDD:226229	38.211	123	74	1	3	123	134	256	4.66e-27	104
tig00001_393	CDD:226229	35.238	105	64	2	18	122	7	107	2.67e-11	59.3
tig00001_393	CDD:225971	32.353	170	109	2	3	166	16	185	5.34e-27	103
tig00001_393	CDD:225107	26	200	130	8	3	198	2	187	3.95e-23	90.1
tig00001_393	CDD:227095	35.897	117	64	3	1	110	1	113	1.17e-21	89.3
tig00001_393	CDD:226931	37.5	104	63	2	3	104	2	105	4.74e-19	79.2
tig00001_393	CDD:226932	23.529	204	130	5	4	202	7	189	1.42e-16	72.3
tig00001_393	CDD:226933	34.746	118	73	3	4	121	13	126	1.1e-14	66.7
tig00001_393	CDD:225111	29.907	107	70	3	1	103	1	106	1.32e-13	65.8
tig00001_393	CDD:226456	30.4	125	82	2	3	127	2	121	2.24e-12	62.2
tig00001_393	CDD:225818	25.309	162	115	3	1	160	1	158	1.74e-11	58.9
tig00001_393	CDD:226230	23.387	124	89	3	1	121	5	125	1.87e-09	52.3
tig00001_393	CDD:226233	24.742	97	70	2	125	219	6	101	2.08e-09	51.6
tig00001_394	CDD:223715	30.12	332	222	7	16	344	3	327	6.31e-53	175
tig00001_394	CDD:225115	28.251	223	154	3	126	344	657	877	2.73e-36	136
tig00001_394	CDD:227335	29.661	236	152	4	119	344	215	446	2.14e-32	122
tig00001_394	CDD:226702	27.917	240	160	5	103	339	505	734	1.26e-27	110
tig00001_394	CDD:226370	28.125	224	123	8	131	332	134	341	6.9e-16	74.7
tig00001_394	CDD:226654	24.138	232	138	10	134	346	389	601	8.54e-16	75.4
tig00001_394	CDD:227333	25.847	236	134	12	131	344	488	704	5.54e-14	69.8
tig00001_394	CDD:225827	36.275	102	59	2	249	347	434	532	6.35e-13	66.5
tig00001_394	CDD:226655	22.176	239	170	7	102	332	422	652	8.8e-08	50.7
tig00001_394	CDD:223716	30.631	111	46	4	262	344	464	571	2.4e-06	46.2
tig00001_394	CDD:225359	26.027	73	52	2	53	124	6	77	0.000114	37.4
tig00001_394	CDD:223910	24.818	137	95	2	61	197	69	197	0.000241	39.6
tig00001_394	CDD:225519	20.056	359	235	11	5	347	131	453	0.000292	39.4
tig00001_394	CDD:224086	15.837	221	151	11	96	301	17	217	0.000385	39.2
tig00001_394	CDD:227278	20.988	81	57	2	170	243	53	133	0.005	35.5
tig00001_395	CDD:223656	25.763	295	210	5	1	291	1	290	2.91e-45	152
tig00001_396	CDD:224724	38.235	238	136	1	1	238	1	227	1.14e-63	195
tig00001_397	CDD:224609	30.841	107	69	2	1	102	1	107	4.82e-19	73.4
tig00001_397	CDD:224240	29.032	62	37	2	24	85	22	76	0.002	32.3
tig00001_397	CDD:224759	27.778	72	48	2	34	105	44	111	0.003	32.2
tig00001_398	CDD:227053	29.534	193	123	3	3	185	5	194	2.07e-15	68.6
tig00001_401	CDD:223407	22.162	185	130	3	56	234	19	195	2.18e-17	77.5
tig00001_402	CDD:227613	40.171	117	65	3	1	117	1	112	3.27e-26	91.7
tig00001_403	CDD:224059	47.577	227	117	2	4	229	1	226	4.59e-109	310
tig00001_403	CDD:224058	41.518	224	129	2	4	226	1	223	8.01e-78	235
tig00001_403	CDD:226647	37.946	224	138	1	4	227	6	228	1.47e-73	221
tig00001_403	CDD:225438	37.991	229	135	4	4	231	1	223	1.36e-68	208
tig00001_403	CDD:224041	35.019	257	142	5	4	249	3	245	2.95e-67	205
tig00001_403	CDD:224051	36.444	225	132	6	4	226	2	217	1.9e-66	203
tig00001_403	CDD:226359	37.5	224	124	4	5	225	4	214	2.01e-66	206
tig00001_403	CDD:226361	35.242	227	134	5	1	225	2	217	1.91e-65	204
tig00001_403	CDD:224054	37.054	224	131	4	1	223	1	215	9.73e-65	200
tig00001_403	CDD:226164	35.656	244	143	4	3	237	2	240	2.65e-61	190
tig00001_403	CDD:224043	36.564	227	127	5	5	225	3	218	1.49e-57	184
tig00001_403	CDD:224047	35.556	225	134	6	2	223	1	217	4.92e-56	176
tig00001_403	CDD:224045	34.061	229	137	5	3	226	1	220	2.35e-55	175
tig00001_403	CDD:223521	36.596	235	131	8	4	223	1	232	1.43e-54	175
tig00001_403	CDD:226643	37.551	245	133	3	1	225	1	245	5.98e-54	175
tig00001_403	CDD:224049	32.759	232	144	8	5	231	4	228	2.71e-52	167
tig00001_403	CDD:224048	29.661	236	155	6	1	226	2	236	2.13e-51	172
tig00001_403	CDD:224048	34.199	231	139	7	4	223	280	508	6.09e-51	171
tig00001_403	CDD:224050	37.778	225	128	5	4	225	1	216	2.38e-51	167
tig00001_403	CDD:224052	36.607	224	131	7	4	223	8	224	5.31e-50	161
tig00001_403	CDD:226961	34.615	234	134	6	5	226	7	233	7.48e-47	153
tig00001_403	CDD:224046	30.043	233	127	6	1	218	1	212	5.86e-46	151
tig00001_403	CDD:223488	28.947	228	141	5	1	215	1	220	8.73e-44	145
tig00001_403	CDD:226635	34.188	234	139	8	5	233	3	226	4.1e-43	143
tig00001_403	CDD:226905	28.959	221	148	1	9	229	5	216	1.02e-42	143
tig00001_403	CDD:226967	28.384	229	117	5	1	223	1	188	1.58e-41	140
tig00001_403	CDD:224053	30.732	205	129	6	4	204	8	203	3.61e-41	144
tig00001_403	CDD:224053	24.779	226	154	7	27	241	277	497	1.33e-22	93
tig00001_403	CDD:226641	35.484	217	124	7	2	205	4	217	1.38e-40	143
tig00001_403	CDD:226641	33.945	218	131	7	24	234	302	513	1.2e-33	124
tig00001_403	CDD:226360	35.859	198	116	5	30	223	18	208	1.53e-40	136
tig00001_403	CDD:225183	30.962	239	141	8	1	227	468	694	1.79e-39	141
tig00001_403	CDD:224042	29.694	229	139	10	4	221	7	224	4.48e-39	133
tig00001_403	CDD:226364	28.986	207	135	4	1	204	1	198	2.2e-38	136
tig00001_403	CDD:226364	25.714	245	163	8	4	236	257	494	4.35e-21	88.8
tig00001_403	CDD:227321	27.559	254	148	9	5	243	321	553	1.03e-37	135
tig00001_403	CDD:226927	34.247	219	133	4	4	221	1	209	1.39e-37	129
tig00001_403	CDD:224026	32.203	236	145	6	4	228	1	232	1.78e-37	129
tig00001_403	CDD:227320	28.151	238	144	6	2	228	334	555	6.27e-37	133
tig00001_403	CDD:224055	30.83	253	138	10	5	241	329	560	3.45e-35	129
tig00001_403	CDD:226970	33.333	201	125	6	25	223	19	212	4.25e-35	122
tig00001_403	CDD:226628	31.551	187	106	4	28	206	17	189	9.9e-34	122
tig00001_403	CDD:223487	31.25	208	113	6	6	202	5	193	6.55e-33	117
tig00001_403	CDD:226929	27.586	232	145	8	4	224	1	220	1.24e-32	117
tig00001_403	CDD:224057	29.911	224	131	8	8	226	26	228	6.15e-32	114
tig00001_403	CDD:226637	34.101	217	123	6	1	205	1	209	3.65e-31	113
tig00001_403	CDD:224044	25.764	229	153	8	4	223	31	251	4.62e-31	112
tig00001_403	CDD:224060	29.032	186	120	4	1	183	1	177	2.21e-30	110
tig00001_403	CDD:227118	29.245	212	142	4	1	205	1	211	1.68e-29	108
tig00001_403	CDD:226963	30.488	246	149	10	4	243	1	230	1.83e-29	108
tig00001_403	CDD:226592	31.33	233	139	9	4	223	6	230	6.13e-29	107
tig00001_403	CDD:226620	31.183	186	114	5	25	205	18	194	7.27e-29	105
tig00001_403	CDD:226952	30	240	139	6	5	223	4	235	2.74e-28	107
tig00001_403	CDD:226969	33.333	213	117	8	25	225	352	551	6.22e-28	108
tig00001_403	CDD:223562	27.155	232	129	10	2	226	319	517	1.48e-27	107
tig00001_403	CDD:223562	24.59	244	144	10	4	224	3	229	2.66e-27	106
tig00001_403	CDD:226631	28.44	218	141	4	5	221	3	206	1.63e-27	104
tig00001_403	CDD:227590	29.741	232	132	9	25	241	279	494	1.44e-21	90.1
tig00001_403	CDD:226639	26.027	219	140	6	16	215	14	229	5.78e-21	87.2
tig00001_403	CDD:227019	27.103	214	137	7	1	205	2	205	1.53e-18	79.3
tig00001_403	CDD:226617	25.668	187	120	6	25	206	18	190	3.32e-18	77.3
tig00001_403	CDD:223473	30.472	233	124	14	19	231	14	228	4.08e-18	78
tig00001_403	CDD:226968	27.273	242	140	8	3	235	321	535	6.96e-18	79.5
tig00001_403	CDD:226646	28.23	209	124	8	25	228	409	596	1.53e-14	69.6
tig00001_403	CDD:225265	25.366	205	134	4	6	206	379	568	1.95e-14	69.5
tig00001_403	CDD:224166	28.571	189	107	6	32	205	97	272	2.88e-12	63.1
tig00001_403	CDD:224166	26.22	164	90	5	22	178	349	488	2.33e-11	60.4
tig00001_403	CDD:226622	25.743	202	120	8	17	205	7	191	1.36e-10	56.8
tig00001_403	CDD:223256	42.105	38	16	1	16	53	614	645	0.00037	38.3
tig00001_403	CDD:223496	25	88	56	4	147	225	817	903	0.004	35.5
tig00001_403	CDD:226984	33.333	39	26	0	29	67	16	54	0.004	35.2
tig00001_403	CDD:225982	21.429	98	65	5	40	126	441	537	0.009	34.3
tig00001_404	CDD:223650	20.408	147	114	1	39	185	274	417	8.6e-06	45.5
[truncated: 10,843 more rows]

## Sheet: H7_GO
Gene	GOID	DEFINITION	ONTOLOGY	TERM
tig00001_1001	GO:0003824	Catalysis of a biochemical reaction at physiological temperatures. In biologically catalyzed reactions, the reactants are known as substrates, and the catalysts are naturally occurring macromolecular substances known as enzymes. Enzymes possess specific binding sites for substrates, and are usually composed wholly or largely of protein, but RNA that has catalytic activity (ribozyme) is often also…	MF	catalytic activity
tig00001_1001	GO:0019700	The chemical reactions and pathways resulting in the breakdown of phosphonates, any organic compound containing one or more C-PO(OH)2 or C-PO(OR)2 (with R=alkyl, aryl) groups. Catabolism of phosphonic acid itself, an inorganic compound without the biochemically relevant C-P bond, is not included.	BP	organic phosphonate catabolic process
tig00001_1002	GO:0034618	Interacting selectively and non-covalently with 2-amino-5-(carbamimidamido)pentanoic acid.	MF	arginine binding
tig00001_1002	GO:0003700	A protein or a member of a complex that interacts selectively and non-covalently with a specific DNA sequence (sometimes referred to as a motif) within the regulatory region of a gene to modulate transcription. Regulatory regions include promoters (proximal and distal) and enhancers. Genes are transcriptional units, and include bacterial operons.	MF	DNA-binding transcription factor activity
tig00001_1003	GO:0003735	The action of a molecule that contributes to the structural integrity of the ribosome.	MF	structural constituent of ribosome
tig00001_1004	GO:0005515	Interacting selectively and non-covalently with any protein or protein complex (a complex of two or more proteins that may include other nonprotein molecules).	MF	protein binding
tig00001_1004	GO:0003746	Functions in chain elongation during polypeptide synthesis at the ribosome.	MF	translation elongation factor activity
tig00001_1005	GO:0005737	All of the contents of a cell excluding the plasma membrane and nucleus, but including other subcellular structures.	CC	cytoplasm
tig00001_1005	GO:0006221	The chemical reactions and pathways resulting in the formation of a pyrimidine nucleotide, a compound consisting of nucleoside (a pyrimidine base linked to a deoxyribose or ribose sugar) esterified with a phosphate group at either the 3' or 5'-hydroxyl group of the sugar.	BP	pyrimidine nucleotide biosynthetic process
tig00001_1006	GO:0006412	The cellular metabolic process in which a protein is formed, using the sequence of a mature mRNA or circRNA molecule to specify the sequence of amino acids in a polypeptide chain. Translation is mediated by the ribosome, and begins with the formation of a ternary complex between aminoacylated initiator methionine tRNA, GTP, and initiation factor 2, which subsequently associates with the small sub…	BP	translation
tig00001_1007	GO:0016765	Catalysis of the transfer of an alkyl or aryl (but not methyl) group from one compound (donor) to another (acceptor).	MF	transferase activity, transferring alkyl or aryl (other than methyl) groups
tig00001_1008	GO:0016020	A lipid bilayer along with all the proteins and protein complexes embedded in it an attached to it.	CC	membrane
tig00001_1009	GO:0004222	Catalysis of the hydrolysis of internal, alpha-peptide bonds in a polypeptide chain by a mechanism in which water acts as a nucleophile, one or two metal ions hold the water molecule in place, and charged amino acid side chains are ligands for the metal ions.	MF	metalloendopeptidase activity
tig00001_1009	GO:0005515	Interacting selectively and non-covalently with any protein or protein complex (a complex of two or more proteins that may include other nonprotein molecules).	MF	protein binding
tig00001_1010	GO:0002161	The hydrolysis of an incorrectly aminoacylated tRNA.	MF	aminoacyl-tRNA editing activity
tig00001_1010	GO:0000166	Interacting selectively and non-covalently with a nucleotide, any compound consisting of a nucleoside that is esterified with (ortho)phosphate or an oligophosphate at any hydroxyl group on the ribose or deoxyribose.	MF	nucleotide binding
tig00001_1010	GO:0004827	Catalysis of the reaction: ATP + L-proline + tRNA(Pro) = AMP + diphosphate + L-prolyl-tRNA(Pro).	MF	proline-tRNA ligase activity
tig00001_1011	GO:0006260	The cellular metabolic process in which a cell duplicates one or more molecules of DNA. DNA replication begins when specific sequences, known as origins of replication, are recognized and bound by initiation proteins, and ends when the original DNA molecule has been completely duplicated and the copies topologically separated. The unit of replication usually corresponds to the genome of the cell,…	BP	DNA replication
tig00001_1011	GO:0003676	Interacting selectively and non-covalently with any nucleic acid.	MF	nucleic acid binding
tig00001_1011	GO:0003677	Any molecular function by which a gene product interacts selectively and non-covalently with DNA (deoxyribonucleic acid).	MF	DNA binding
tig00001_1011	GO:0003824	Catalysis of a biochemical reaction at physiological temperatures. In biologically catalyzed reactions, the reactants are known as substrates, and the catalysts are naturally occurring macromolecular substances known as enzymes. Enzymes possess specific binding sites for substrates, and are usually composed wholly or largely of protein, but RNA that has catalytic activity (ribozyme) is often also…	MF	catalytic activity
tig00001_1012	GO:0042274	A cellular process that results in the biosynthesis of constituent macromolecules, assembly, and arrangement of constituent parts of a small ribosomal subunit; includes transport to the sites of protein synthesis.	BP	ribosomal small subunit biogenesis
tig00001_1013	GO:0003723	Interacting selectively and non-covalently with an RNA molecule or a portion thereof.	MF	RNA binding
tig00001_1013	GO:0006353	The cellular process that completes DNA-templated transcription; the formation of phosphodiester bonds ceases, the RNA-DNA hybrid dissociates, and RNA polymerase releases the DNA.	BP	DNA-templated transcription, termination
tig00001_1013	GO:0003700	A protein or a member of a complex that interacts selectively and non-covalently with a specific DNA sequence (sometimes referred to as a motif) within the regulatory region of a gene to modulate transcription. Regulatory regions include promoters (proximal and distal) and enhancers. Genes are transcriptional units, and include bacterial operons.	MF	DNA-binding transcription factor activity
tig00001_1013	GO:0003676	Interacting selectively and non-covalently with any nucleic acid.	MF	nucleic acid binding
tig00001_1015	GO:0003723	Interacting selectively and non-covalently with an RNA molecule or a portion thereof.	MF	RNA binding
tig00001_1016	GO:0005525	Interacting selectively and non-covalently with GTP, guanosine triphosphate.	MF	GTP binding
tig00001_1016	GO:0003743	Functions in the initiation of ribosome-mediated translation of mRNA into a polypeptide.	MF	translation initiation factor activity
tig00001_1016	GO:0003924	Catalysis of the reaction: GTP + H2O = GDP + phosphate.	MF	GTPase activity
tig00001_1017	GO:0006364	Any process involved in the conversion of a primary ribosomal RNA (rRNA) transcript into one or more mature rRNA molecules.	BP	rRNA processing
tig00001_1018	GO:0005975	The chemical reactions and pathways involving carbohydrates, any of a group of organic compounds based of the general formula Cx(H2O)y. Includes the formation of carbohydrate derivatives by the addition of a carbohydrate residue to another molecule.	BP	carbohydrate metabolic process
tig00001_1018	GO:0003824	Catalysis of a biochemical reaction at physiological temperatures. In biologically catalyzed reactions, the reactants are known as substrates, and the catalysts are naturally occurring macromolecular substances known as enzymes. Enzymes possess specific binding sites for substrates, and are usually composed wholly or largely of protein, but RNA that has catalytic activity (ribozyme) is often also…	MF	catalytic activity
tig00001_1019	GO:0001522	The intramolecular conversion of uridine to pseudouridine within an RNA molecule. This posttranscriptional base modification occurs in tRNA, rRNA, and snRNAs.	BP	pseudouridine synthesis
tig00001_1019	GO:0006396	Any process involved in the conversion of one or more primary RNA transcripts into one or more mature RNA molecules.	BP	RNA processing
tig00001_101	GO:0004371	Catalysis of the reaction: ATP + glycerone = ADP + glycerone phosphate + 2 H(+).	MF	glycerone kinase activity
tig00001_1020	GO:0008531	Catalysis of the reaction: ATP + riboflavin = ADP + FMN + 2 H(+).	MF	riboflavin kinase activity
tig00001_1020	GO:0003919	Catalysis of the reaction: ATP + FMN = diphosphate + FAD.	MF	FMN adenylyltransferase activity
tig00001_1022	GO:0015144	Enables the transfer of carbohydrate from one side of a membrane to the other.	MF	carbohydrate transmembrane transporter activity
tig00001_1023	GO:0003677	Any molecular function by which a gene product interacts selectively and non-covalently with DNA (deoxyribonucleic acid).	MF	DNA binding
tig00001_1025	GO:0002161	The hydrolysis of an incorrectly aminoacylated tRNA.	MF	aminoacyl-tRNA editing activity
tig00001_102	GO:0003676	Interacting selectively and non-covalently with any nucleic acid.	MF	nucleic acid binding
tig00001_102	GO:0003678	Catalysis of the reaction: NTP + H2O = NDP + phosphate, to drive the unwinding of a DNA helix.	MF	DNA helicase activity
tig00001_1031	GO:0004109	Catalysis of the reaction: coproporphyrinogen III + 2 H(+) + O(2) = 2 CO(2) + 2 H(2)O + protoporphyrinogen IX.	MF	coproporphyrinogen oxidase activity
tig00001_1031	GO:0003824	Catalysis of a biochemical reaction at physiological temperatures. In biologically catalyzed reactions, the reactants are known as substrates, and the catalysts are naturally occurring macromolecular substances known as enzymes. Enzymes possess specific binding sites for substrates, and are usually composed wholly or largely of protein, but RNA that has catalytic activity (ribozyme) is often also…	MF	catalytic activity
tig00001_1032	GO:0003677	Any molecular function by which a gene product interacts selectively and non-covalently with DNA (deoxyribonucleic acid).	MF	DNA binding
tig00001_1033	GO:0000774	Stimulates the hydrolysis and exchange of adenyl nucleotides by other proteins.	MF	adenyl-nucleotide exchange factor activity
tig00001_1033	GO:0006457	The process of assisting in the covalent and noncovalent assembly of single chain polypeptides or multisubunit complexes into the correct tertiary structure.	BP	protein folding
tig00001_1034	GO:0005524	Interacting selectively and non-covalently with ATP, adenosine 5'-triphosphate, a universally important coenzyme and enzyme regulator.	MF	ATP binding
tig00001_1035	GO:0031072	Interacting selectively and non-covalently with a heat shock protein, any protein synthesized or activated in response to heat shock.	MF	heat shock protein binding
tig00001_1035	GO:0006457	The process of assisting in the covalent and noncovalent assembly of single chain polypeptides or multisubunit complexes into the correct tertiary structure.	BP	protein folding
tig00001_1035	GO:0005524	Interacting selectively and non-covalently with ATP, adenosine 5'-triphosphate, a universally important coenzyme and enzyme regulator.	MF	ATP binding
tig00001_1036	GO:0003333	The process in which an amino acid is transported across a membrane.	BP	amino acid transmembrane transport
tig00001_1036	GO:0005524	Interacting selectively and non-covalently with ATP, adenosine 5'-triphosphate, a universally important coenzyme and enzyme regulator.	MF	ATP binding
tig00001_1037	GO:0016021	The component of a membrane consisting of the gene products and protein complexes having at least some part of their peptide sequence embedded in the hydrophobic region of the membrane.	CC	integral component of membrane
tig00001_1037	GO:0016020	A lipid bilayer along with all the proteins and protein complexes embedded in it an attached to it.	CC	membrane
tig00001_1038	GO:0003677	Any molecular function by which a gene product interacts selectively and non-covalently with DNA (deoxyribonucleic acid).	MF	DNA binding
tig00001_1038	GO:0005515	Interacting selectively and non-covalently with any protein or protein complex (a complex of two or more proteins that may include other nonprotein molecules).	MF	protein binding
tig00001_1039	GO:0005524	Interacting selectively and non-covalently with ATP, adenosine 5'-triphosphate, a universally important coenzyme and enzyme regulator.	MF	ATP binding
tig00001_1039	GO:0003677	Any molecular function by which a gene product interacts selectively and non-covalently with DNA (deoxyribonucleic acid).	MF	DNA binding
tig00001_103	GO:0006633	The chemical reactions and pathways resulting in the formation of a fatty acid, any of the aliphatic monocarboxylic acids that can be liberated by hydrolysis from naturally occurring fats and oils. Fatty acids are predominantly straight-chain acids of 4 to 24 carbon atoms, which may be saturated or unsaturated; branched fatty acids and hydroxy fatty acids also occur, and very long chain acids of …	BP	fatty acid biosynthetic process
tig00001_103	GO:0003824	Catalysis of a biochemical reaction at physiological temperatures. In biologically catalyzed reactions, the reactants are known as substrates, and the catalysts are naturally occurring macromolecular substances known as enzymes. Enzymes possess specific binding sites for substrates, and are usually composed wholly or largely of protein, but RNA that has catalytic activity (ribozyme) is often also…	MF	catalytic activity
tig00001_1040	GO:0005524	Interacting selectively and non-covalently with ATP, adenosine 5'-triphosphate, a universally important coenzyme and enzyme regulator.	MF	ATP binding
tig00001_1041	GO:0047661	Catalysis of the reaction: an L-amino acid = a D-amino acid.	MF	amino-acid racemase activity
tig00001_1041	GO:0016855	Catalysis of a reaction that alters the configuration of one or more chiral centers in an amino acid.	MF	racemase and epimerase activity, acting on amino acids and derivatives
tig00001_1041	GO:0006807	The chemical reactions and pathways involving organic or inorganic compounds that contain nitrogen.	BP	nitrogen compound metabolic process
tig00001_1042	GO:0005524	Interacting selectively and non-covalently with ATP, adenosine 5'-triphosphate, a universally important coenzyme and enzyme regulator.	MF	ATP binding
tig00001_1044	GO:0043937	Any process that modulates the frequency, rate or extent of sporulation, the process whose specific outcome is the progression of a spore over time, from its initiation to the mature structure.	BP	regulation of sporulation
tig00001_104	GO:0006633	The chemical reactions and pathways resulting in the formation of a fatty acid, any of the aliphatic monocarboxylic acids that can be liberated by hydrolysis from naturally occurring fats and oils. Fatty acids are predominantly straight-chain acids of 4 to 24 carbon atoms, which may be saturated or unsaturated; branched fatty acids and hydroxy fatty acids also occur, and very long chain acids of …	BP	fatty acid biosynthetic process
tig00001_1052	GO:0016903	Catalysis of an oxidation-reduction (redox) reaction in which an aldehyde or ketone (oxo) group acts as a hydrogen or electron donor and reduces a hydrogen or electron acceptor.	MF	oxidoreductase activity, acting on the aldehyde or oxo group of donors
tig00001_1052	GO:0003824	Catalysis of a biochemical reaction at physiological temperatures. In biologically catalyzed reactions, the reactants are known as substrates, and the catalysts are naturally occurring macromolecular substances known as enzymes. Enzymes possess specific binding sites for substrates, and are usually composed wholly or largely of protein, but RNA that has catalytic activity (ribozyme) is often also…	MF	catalytic activity
tig00001_1052	GO:0005506	Interacting selectively and non-covalently with iron (Fe) ions.	MF	iron ion binding
tig00001_1052	GO:0016491	Catalysis of an oxidation-reduction (redox) reaction, a reversible chemical reaction in which the oxidation state of an atom or atoms within a molecule is altered. One substrate acts as a hydrogen or electron donor and becomes oxidized, while the other acts as hydrogen or electron acceptor and becomes reduced.	MF	oxidoreductase activity
tig00001_1053	GO:0004016	Catalysis of the reaction: ATP = 3',5'-cyclic AMP + diphosphate.	MF	adenylate cyclase activity
tig00001_1055	GO:0016868	Catalysis of the transfer of a phosphate group from one position to another within a single molecule.	MF	intramolecular transferase activity, phosphotransferases
tig00001_1055	GO:0005975	The chemical reactions and pathways involving carbohydrates, any of a group of organic compounds based of the general formula Cx(H2O)y. Includes the formation of carbohydrate derivatives by the addition of a carbohydrate residue to another molecule.	BP	carbohydrate metabolic process
tig00001_1055	GO:0000287	Interacting selectively and non-covalently with magnesium (Mg) ions.	MF	magnesium ion binding
tig00001_1056	GO:0097367	Interacting selectively and non-covalently with a carbohydrate derivative.	MF	carbohydrate derivative binding
tig00001_1056	GO:0004360	Catalysis of the reaction: beta-D-fructose 6-phosphate + L-glutamine = D-glucosamine 6-phosphate + L-glutamate.	MF	glutamine-fructose-6-phosphate transaminase (isomerizing) activity
tig00001_1058	GO:0006508	The hydrolysis of proteins into smaller polypeptides and/or amino acids by cleavage of their peptide bonds.	BP	proteolysis
tig00001_105	GO:0005524	Interacting selectively and non-covalently with ATP, adenosine 5'-triphosphate, a universally important coenzyme and enzyme regulator.	MF	ATP binding
tig00001_105	GO:0000166	Interacting selectively and non-covalently with a nucleotide, any compound consisting of a nucleoside that is esterified with (ortho)phosphate or an oligophosphate at any hydroxyl group on the ribose or deoxyribose.	MF	nucleotide binding
tig00001_1061	GO:0006457	The process of assisting in the covalent and noncovalent assembly of single chain polypeptides or multisubunit complexes into the correct tertiary structure.	BP	protein folding
tig00001_1061	GO:0003755	Catalysis of the reaction: peptidyl-proline (omega=180) = peptidyl-proline (omega=0).	MF	peptidyl-prolyl cis-trans isomerase activity
tig00001_1061	GO:0015031	The directed movement of proteins into, out of or within a cell, or between cells, by means of some agent such as a transporter or pore.	BP	protein transport
tig00001_1062	GO:0008270	Interacting selectively and non-covalently with zinc (Zn) ions.	MF	zinc ion binding
tig00001_1062	GO:0005524	Interacting selectively and non-covalently with ATP, adenosine 5'-triphosphate, a universally important coenzyme and enzyme regulator.	MF	ATP binding
tig00001_1063	GO:0005525	Interacting selectively and non-covalently with GTP, guanosine triphosphate.	MF	GTP binding
tig00001_1067	GO:0003700	A protein or a member of a complex that interacts selectively and non-covalently with a specific DNA sequence (sometimes referred to as a motif) within the regulatory region of a gene to modulate transcription. Regulatory regions include promoters (proximal and distal) and enhancers. Genes are transcriptional units, and include bacterial operons.	MF	DNA-binding transcription factor activity
tig00001_1068	GO:0005975	The chemical reactions and pathways involving carbohydrates, any of a group of organic compounds based of the general formula Cx(H2O)y. Includes the formation of carbohydrate derivatives by the addition of a carbohydrate residue to another molecule.	BP	carbohydrate metabolic process
tig00001_1068	GO:0016773	Catalysis of the transfer of a phosphorus-containing group from one compound (donor) to an alcohol group (acceptor).	MF	phosphotransferase activity, alcohol group as acceptor
tig00001_1068	GO:0008662	Catalysis of the reaction: ATP + D-fructose 1-phosphate = ADP + D-fructose 1,6-bisphosphate.	MF	1-phosphofructokinase activity
tig00001_1069	GO:0008982	Catalysis of the PEP-dependent, phosphoryl transfer-driven transport of substances across a membrane. The transport happens by catalysis of the reaction: protein N-phosphohistidine + sugar(out) = protein histidine + sugar phosphate(in). This differs from primary and secondary active transport in that the solute is modified during transport.	MF	protein-N(PI)-phosphohistidine-sugar phosphotransferase activity
tig00001_1069	GO:0009401	The uptake and phosphorylation of specific carbohydrates from the extracellular environment; uptake and phosphorylation are coupled, making the PTS a link between the uptake and metabolism of sugars; phosphoenolpyruvate is the original phosphate donor; phosphoenolpyruvate passes the phosphate via a signal transduction pathway, to enzyme 1 (E1), which in turn passes it on to the histidine protein,…	BP	phosphoenolpyruvate-dependent sugar phosphotransferase system
tig00001_1069	GO:0005351	Enables the transfer of a solute or solutes from one side of a membrane to the other according to the reaction: sugar(out) + H+(out) = sugar(in) + H+(in).	MF	carbohydrate:proton symporter activity
tig00001_106	GO:0000166	Interacting selectively and non-covalently with a nucleotide, any compound consisting of a nucleoside that is esterified with (ortho)phosphate or an oligophosphate at any hydroxyl group on the ribose or deoxyribose.	MF	nucleotide binding
tig00001_106	GO:0005524	Interacting selectively and non-covalently with ATP, adenosine 5'-triphosphate, a universally important coenzyme and enzyme regulator.	MF	ATP binding
tig00001_1070	GO:0006813	The directed movement of potassium ions (K+) into, out of or within a cell, or between cells, by means of some agent such as a transporter or pore.	BP	potassium ion transport
tig00001_1070	GO:0005247	Enables the transmembrane transfer of a chloride ion by a voltage-gated channel. A voltage-gated channel is a channel whose open state is dependent on the voltage across the membrane in which it is embedded.	MF	voltage-gated chloride channel activity
tig00001_1071	GO:0005524	Interacting selectively and non-covalently with ATP, adenosine 5'-triphosphate, a universally important coenzyme and enzyme regulator.	MF	ATP binding
tig00001_1071	GO:0003677	Any molecular function by which a gene product interacts selectively and non-covalently with DNA (deoxyribonucleic acid).	MF	DNA binding
tig00001_1071	GO:0003678	Catalysis of the reaction: NTP + H2O = NDP + phosphate, to drive the unwinding of a DNA helix.	MF	DNA helicase activity
tig00001_1072	GO:0003911	Catalysis of the reaction: NAD+ + deoxyribonucleotide(n) + deoxyribonucleotide(m) = AMP + nicotinamide nucleotide + deoxyribonucleotide(n+m).	MF	DNA ligase (NAD+) activity
tig00001_1073	GO:0006450	Any process that modulates the ability of the translational apparatus to interpret the genetic code.	BP	regulation of translational fidelity
tig00001_1074	GO:0006412	The cellular metabolic process in which a protein is formed, using the sequence of a mature mRNA or circRNA molecule to specify the sequence of amino acids in a polypeptide chain. Translation is mediated by the ribosome, and begins with the formation of a ternary complex between aminoacylated initiator methionine tRNA, GTP, and initiation factor 2, which subsequently associates with the small sub…	BP	translation
tig00001_1074	GO:0016787	Catalysis of the hydrolysis of various bonds, e.g. C-O, C-N, C-C, phosphoric anhydride bonds, etc. Hydrolase is the systematic name for any enzyme of EC class 3.	MF	hydrolase activity
tig00001_1075	GO:0016884	Catalysis of the transfer of the amide nitrogen of glutamine to a variety of substrates. GATases catalyze two separate reactions at two active sites, which are located either on a single polypeptide chain or on different subunits. In the glutaminase reaction, glutamine is hydrolyzed to glutamate and ammonia, which is added to an acceptor substrate in the synthase reaction.	MF	carbon-nitrogen ligase activity, with glutamine as amido-N-donor
tig00001_1075	GO:0003824	Catalysis of a biochemical reaction at physiological temperatures. In biologically catalyzed reactions, the reactants are known as substrates, and the catalysts are naturally occurring macromolecular substances known as enzymes. Enzymes possess specific binding sites for substrates, and are usually composed wholly or largely of protein, but RNA that has catalytic activity (ribozyme) is often also…	MF	catalytic activity
tig00001_1075	GO:0016874	Catalysis of the joining of two substances, or two groups within a single molecule, with the concomitant hydrolysis of the diphosphate bond in ATP or a similar triphosphate.	MF	ligase activity
tig00001_1076	GO:0003951	Catalysis of the reaction: ATP + NAD(+) = ADP + 2 H(+) + NADP(+).	MF	NAD+ kinase activity
tig00001_1076	GO:0016301	Catalysis of the transfer of a phosphate group, usually from ATP, to a substrate molecule.	MF	kinase activity
tig00001_1077	GO:0006396	Any process involved in the conversion of one or more primary RNA transcripts into one or more mature RNA molecules.	BP	RNA processing
tig00001_1079	GO:0016787	Catalysis of the hydrolysis of various bonds, e.g. C-O, C-N, C-C, phosphoric anhydride bonds, etc. Hydrolase is the systematic name for any enzyme of EC class 3.	MF	hydrolase activity
tig00001_107	GO:0016020	A lipid bilayer along with all the proteins and protein complexes embedded in it an attached to it.	CC	membrane
tig00001_1080	GO:0003677	Any molecular function by which a gene product interacts selectively and non-covalently with DNA (deoxyribonucleic acid).	MF	DNA binding
tig00001_1081	GO:0004553	Catalysis of the hydrolysis of any O-glycosyl bond.	MF	hydrolase activity, hydrolyzing O-glycosyl compounds
tig00001_1081	GO:0003824	Catalysis of a biochemical reaction at physiological temperatures. In biologically catalyzed reactions, the reactants are known as substrates, and the catalysts are naturally occurring macromolecular substances known as enzymes. Enzymes possess specific binding sites for substrates, and are usually composed wholly or largely of protein, but RNA that has catalytic activity (ribozyme) is often also…	MF	catalytic activity
tig00001_1081	GO:0004557	Catalysis of the hydrolysis of terminal, non-reducing alpha-D-galactose residues in alpha-D-galactosides, including galactose oligosaccharides, galactomannans and galactohydrolase.	MF	alpha-galactosidase activity
tig00001_1082	GO:0004553	Catalysis of the hydrolysis of any O-glycosyl bond.	MF	hydrolase activity, hydrolyzing O-glycosyl compounds
tig00001_1082	GO:0016798	Catalysis of the hydrolysis of any glycosyl bond.	MF	hydrolase activity, acting on glycosyl bonds
tig00001_1083	GO:0004565	Catalysis of the hydrolysis of terminal, non-reducing beta-D-galactose residues in beta-D-galactosides.	MF	beta-galactosidase activity
tig00001_1083	GO:0016798	Catalysis of the hydrolysis of any glycosyl bond.	MF	hydrolase activity, acting on glycosyl bonds
tig00001_1083	GO:0030246	Interacting selectively and non-covalently with any carbohydrate, which includes monosaccharides, oligosaccharides and polysaccharides as well as substances derived from monosaccharides by reduction of the carbonyl group (alditols), by oxidation of one or more hydroxy groups to afford the corresponding aldehydes, ketones, or carboxylic acids, or by replacement of one or more hydroxy group(s) by a…	MF	carbohydrate binding
tig00001_1083	GO:0003824	Catalysis of a biochemical reaction at physiological temperatures. In biologically catalyzed reactions, the reactants are known as substrates, and the catalysts are naturally occurring macromolecular substances known as enzymes. Enzymes possess specific binding sites for substrates, and are usually composed wholly or largely of protein, but RNA that has catalytic activity (ribozyme) is often also…	MF	catalytic activity
tig00001_1084	GO:0009058	The chemical reactions and pathways resulting in the formation of substances; typically the energy-requiring part of metabolism in which simpler substances are transformed into more complex ones.	BP	biosynthetic process
tig00001_1084	GO:0003824	Catalysis of a biochemical reaction at physiological temperatures. In biologically catalyzed reactions, the reactants are known as substrates, and the catalysts are naturally occurring macromolecular substances known as enzymes. Enzymes possess specific binding sites for substrates, and are usually composed wholly or largely of protein, but RNA that has catalytic activity (ribozyme) is often also…	MF	catalytic activity
tig00001_1084	GO:0009073	The chemical reactions and pathways resulting in the formation of aromatic amino acid family, amino acids with aromatic ring (phenylalanine, tyrosine, tryptophan).	BP	aromatic amino acid family biosynthetic process
tig00001_1085	GO:0003856	Catalysis of the reaction: 7-phospho-2-dehydro-3-deoxy-D-arabino-heptonate = 3-dehydroquinate + phosphate.	MF	3-dehydroquinate synthase activity
tig00001_1085	GO:0009073	The chemical reactions and pathways resulting in the formation of aromatic amino acid family, amino acids with aromatic ring (phenylalanine, tyrosine, tryptophan).	BP	aromatic amino acid family biosynthetic process
tig00001_1086	GO:0004107	Catalysis of the reaction: 5-O-(1-carboxyvinyl)-3-phosphoshikimate = chorismate + phosphate.	MF	chorismate synthase activity
tig00001_1087	GO:0004665	Catalysis of the reaction: NADP(+) + prephenate = (4-hydroxyphenyl)pyruvate + CO(2) + NADPH.	MF	prephenate dehydrogenase (NADP+) activity
tig00001_1087	GO:0055114	A metabolic process that results in the removal or addition of one or more electrons to or from a substance, with or without the concomitant removal or addition of a proton or protons.	BP	oxidation-reduction process
tig00001_1088	GO:0003866	Catalysis of the reaction: 3-phosphoshikimate + phosphoenolpyruvate = 5-O-(1-carboxyvinyl)-3-phosphoshikimate + phosphate.	MF	3-phosphoshikimate 1-carboxyvinyltransferase activity
tig00001_1088	GO:0003824	Catalysis of a biochemical reaction at physiological temperatures. In biologically catalyzed reactions, the reactants are known as substrates, and the catalysts are naturally occurring macromolecular substances known as enzymes. Enzymes possess specific binding sites for substrates, and are usually composed wholly or largely of protein, but RNA that has catalytic activity (ribozyme) is often also…	MF	catalytic activity
tig00001_1088	GO:0016765	Catalysis of the transfer of an alkyl or aryl (but not methyl) group from one compound (donor) to another (acceptor).	MF	transferase activity, transferring alkyl or aryl (other than methyl) groups
tig00001_108	GO:0016020	A lipid bilayer along with all the proteins and protein complexes embedded in it an attached to it.	CC	membrane
tig00001_1090	GO:0004664	Catalysis of the reaction: prephenate = phenylpyruvate + H2O + CO2.	MF	prephenate dehydratase activity
tig00001_1091	GO:0007165	The cellular process in which a signal is conveyed to trigger a change in the activity or state of a cell. Signal transduction begins with reception of a signal (e.g. a ligand binding to a receptor or receptor activation by a stimulus such as light), or for signal transduction in the absence of ligand, signal-withdrawal or the activity of a constitutively active receptor. Signal transduction ends…	BP	signal transduction
tig00001_1091	GO:0000155	Catalysis of the phosphorylation of a histidine residue in response to detection of an extracellular signal such as a chemical ligand or change in environment, to initiate a change in cell state or activity. The two-component sensor is a histidine kinase that autophosphorylates a histidine residue in its active site. The phosphate is then transferred to an aspartate residue in a downstream respon…	MF	phosphorelay sensor kinase activity
tig00001_1091	GO:0016310	The process of introducing a phosphate group into a molecule, usually with the formation of a phosphoric ester, a phosphoric anhydride or a phosphoric amide.	BP	phosphorylation
tig00001_1092	GO:0003700	A protein or a member of a complex that interacts selectively and non-covalently with a specific DNA sequence (sometimes referred to as a motif) within the regulatory region of a gene to modulate transcription. Regulatory regions include promoters (proximal and distal) and enhancers. Genes are transcriptional units, and include bacterial operons.	MF	DNA-binding transcription factor activity
tig00001_1092	GO:0000160	A conserved series of molecular signals found in prokaryotes and eukaryotes; involves autophosphorylation of a histidine kinase and the transfer of the phosphate group to an aspartate that then acts as a phospho-donor to response regulator proteins.	BP	phosphorelay signal transduction system
tig00001_1094	GO:0016020	A lipid bilayer along with all the proteins and protein complexes embedded in it an attached to it.	CC	membrane
tig00001_1095	GO:0016020	A lipid bilayer along with all the proteins and protein complexes embedded in it an attached to it.	CC	membrane
tig00001_1098	GO:0006808	Any process that modulates the frequency, rate or extent of nitrogen utilization.	BP	regulation of nitrogen utilization
tig00001_109	GO:0043190	A complex for the transport of metabolites into and out of the cell, typically comprised of four domains; two membrane-associated domains and two ATP-binding domains at the intracellular face of the membrane, that form a central pore through the plasma membrane. Each of the four core domains may be encoded as a separate polypeptide or the domains can be fused in any one of a number of ways into m…	CC	ATP-binding cassette (ABC) transporter complex
tig00001_1101	GO:0004619	Catalysis of the reaction: 2-phospho-D-glycerate = 3-phospho-D-glycerate.	MF	phosphoglycerate mutase activity
tig00001_1101	GO:0003824	Catalysis of a biochemical reaction at physiological temperatures. In biologically catalyzed reactions, the reactants are known as substrates, and the catalysts are naturally occurring macromolecular substances known as enzymes. Enzymes possess specific binding sites for substrates, and are usually composed wholly or largely of protein, but RNA that has catalytic activity (ribozyme) is often also…	MF	catalytic activity
tig00001_1102	GO:0016787	Catalysis of the hydrolysis of various bonds, e.g. C-O, C-N, C-C, phosphoric anhydride bonds, etc. Hydrolase is the systematic name for any enzyme of EC class 3.	MF	hydrolase activity
tig00001_1104	GO:0015293	Enables the active transport of a solute across a membrane by a mechanism whereby two or more species are transported together in the same direction in a tightly coupled process not directly linked to a form of energy other than chemiosmotic energy.	MF	symporter activity
tig00001_1107	GO:0016787	Catalysis of the hydrolysis of various bonds, e.g. C-O, C-N, C-C, phosphoric anhydride bonds, etc. Hydrolase is the systematic name for any enzyme of EC class 3.	MF	hydrolase activity
tig00001_1108	GO:0003676	Interacting selectively and non-covalently with any nucleic acid.	MF	nucleic acid binding
tig00001_1108	GO:0006139	Any cellular metabolic process involving nucleobases, nucleosides, nucleotides and nucleic acids.	BP	nucleobase-containing compound metabolic process
tig00001_110	GO:0004525	Catalysis of the endonucleolytic cleavage of RNA with 5'-phosphomonoesters and 3'-OH termini; makes two staggered cuts in both strands of dsRNA, leaving a 3' overhang of 2 nt.	MF	ribonuclease III activity
tig00001_110	GO:0003723	Interacting selectively and non-covalently with an RNA molecule or a portion thereof.	MF	RNA binding
tig00001_1111	GO:0005524	Interacting selectively and non-covalently with ATP, adenosine 5'-triphosphate, a universally important coenzyme and enzyme regulator.	MF	ATP binding
tig00001_1111	GO:0008763	Catalysis of the reaction: L-alanine + ATP + UDP-N-acetylmuramate = ADP + 2 H(+) + phosphate + UDP-N-acetylmuramoyl-L-alanine.	MF	UDP-N-acetylmuramate-L-alanine ligase activity
tig00001_1114	GO:0003677	Any molecular function by which a gene product interacts selectively and non-covalently with DNA (deoxyribonucleic acid).	MF	DNA binding
tig00001_1114	GO:0003887	Catalysis of the reaction: deoxynucleoside triphosphate + DNA(n) = diphosphate + DNA(n+1); the synthesis of DNA from deoxyribonucleotide triphosphates in the presence of a DNA template and a 3'hydroxyl group.	MF	DNA-directed DNA polymerase activity
tig00001_1114	GO:0003676	Interacting selectively and non-covalently with any nucleic acid.	MF	nucleic acid binding
tig00001_1115	GO:0003906	Catalysis of the cleavage of the C-O-P bond in the AP site created when DNA glycosylase removes a damaged base, involved in the DNA base excision repair pathway (BER).	MF	DNA-(apurinic or apyrimidinic site) endonuclease activity
tig00001_1115	GO:0003684	Interacting selectively and non-covalently with damaged DNA.	MF	damaged DNA binding
tig00001_1115	GO:0003676	Interacting selectively and non-covalently with any nucleic acid.	MF	nucleic acid binding
tig00001_1115	GO:0003677	Any molecular function by which a gene product interacts selectively and non-covalently with DNA (deoxyribonucleic acid).	MF	DNA binding
tig00001_1116	GO:0004140	Catalysis of the reaction: 3'-dephospho-CoA + ATP = ADP + CoA + 2 H(+).	MF	dephospho-CoA kinase activity
tig00001_1118	GO:0008270	Interacting selectively and non-covalently with zinc (Zn) ions.	MF	zinc ion binding
tig00001_111	GO:0005515	Interacting selectively and non-covalently with any protein or protein complex (a complex of two or more proteins that may include other nonprotein molecules).	MF	protein binding
tig00001_111	GO:0007062	The cell cycle process in which the sister chromatids of a replicated chromosome become tethered to each other.	BP	sister chromatid cohesion
tig00001_1120	GO:0005524	Interacting selectively and non-covalently with ATP, adenosine 5'-triphosphate, a universally important coenzyme and enzyme regulator.	MF	ATP binding
tig00001_1122	GO:0016429	Catalysis of the reaction: S-adenosyl-L-methionine + tRNA = S-adenosyl-L-homocysteine + tRNA containing N1-methyladenine.	MF	tRNA (adenine-N1-)-methyltransferase activity
tig00001_1124	GO:0006518	The chemical reactions and pathways involving peptides, compounds of two or more amino acids where the alpha carboxyl group of one is bound to the alpha amino group of another.	BP	peptide metabolic process
tig00001_1124	GO:0016787	Catalysis of the hydrolysis of various bonds, e.g. C-O, C-N, C-C, phosphoric anhydride bonds, etc. Hydrolase is the systematic name for any enzyme of EC class 3.	MF	hydrolase activity
tig00001_1125	GO:0016301	Catalysis of the transfer of a phosphate group, usually from ATP, to a substrate molecule.	MF	kinase activity
tig00001_1125	GO:0003951	Catalysis of the reaction: ATP + NAD(+) = ADP + 2 H(+) + NADP(+).	MF	NAD+ kinase activity
tig00001_1128	GO:0005524	Interacting selectively and non-covalently with ATP, adenosine 5'-triphosphate, a universally important coenzyme and enzyme regulator.	MF	ATP binding
tig00001_1128	GO:0005737	All of the contents of a cell excluding the plasma membrane and nucleus, but including other subcellular structures.	CC	cytoplasm
tig00001_112	GO:0016787	Catalysis of the hydrolysis of various bonds, e.g. C-O, C-N, C-C, phosphoric anhydride bonds, etc. Hydrolase is the systematic name for any enzyme of EC class 3.	MF	hydrolase activity
tig00001_1131	GO:0008080	Catalysis of the transfer of an acetyl group to a nitrogen atom on the acceptor molecule.	MF	N-acetyltransferase activity
tig00001_1132	GO:0003924	Catalysis of the reaction: GTP + H2O = GDP + phosphate.	MF	GTPase activity
tig00001_1132	GO:0005525	Interacting selectively and non-covalently with GTP, guanosine triphosphate.	MF	GTP binding
tig00001_1137	GO:0003676	Interacting selectively and non-covalently with any nucleic acid.	MF	nucleic acid binding
tig00001_1138	GO:0003700	A protein or a member of a complex that interacts selectively and non-covalently with a specific DNA sequence (sometimes referred to as a motif) within the regulatory region of a gene to modulate transcription. Regulatory regions include promoters (proximal and distal) and enhancers. Genes are transcriptional units, and include bacterial operons.	MF	DNA-binding transcription factor activity
tig00001_113	GO:0005525	Interacting selectively and non-covalently with GTP, guanosine triphosphate.	MF	GTP binding
tig00001_113	GO:0006614	The targeting of proteins to a membrane that occurs during translation and is dependent upon two key components, the signal-recognition particle (SRP) and the SRP receptor. SRP is a cytosolic particle that transiently binds to the endoplasmic reticulum (ER) signal sequence in a nascent protein, to the large ribosomal unit, and to the SRP receptor in the ER membrane.	BP	SRP-dependent cotranslational protein targeting to membrane
tig00001_1140	GO:0003824	Catalysis of a biochemical reaction at physiological temperatures. In biologically catalyzed reactions, the reactants are known as substrates, and the catalysts are naturally occurring macromolecular substances known as enzymes. Enzymes possess specific binding sites for substrates, and are usually composed wholly or largely of protein, but RNA that has catalytic activity (ribozyme) is often also…	MF	catalytic activity
tig00001_1143	GO:0003677	Any molecular function by which a gene product interacts selectively and non-covalently with DNA (deoxyribonucleic acid).	MF	DNA binding
tig00001_1147	GO:0055114	A metabolic process that results in the removal or addition of one or more electrons to or from a substance, with or without the concomitant removal or addition of a proton or protons.	BP	oxidation-reduction process
tig00001_1147	GO:0016491	Catalysis of an oxidation-reduction (redox) reaction, a reversible chemical reaction in which the oxidation state of an atom or atoms within a molecule is altered. One substrate acts as a hydrogen or electron donor and becomes oxidized, while the other acts as hydrogen or electron acceptor and becomes reduced.	MF	oxidoreductase activity
tig00001_1148	GO:0003700	A protein or a member of a complex that interacts selectively and non-covalently with a specific DNA sequence (sometimes referred to as a motif) within the regulatory region of a gene to modulate transcription. Regulatory regions include promoters (proximal and distal) and enhancers. Genes are transcriptional units, and include bacterial operons.	MF	DNA-binding transcription factor activity
tig00001_1148	GO:0006355	Any process that modulates the frequency, rate or extent of cellular DNA-templated transcription.	BP	regulation of transcription, DNA-templated
tig00001_1148	GO:0008982	Catalysis of the PEP-dependent, phosphoryl transfer-driven transport of substances across a membrane. The transport happens by catalysis of the reaction: protein N-phosphohistidine + sugar(out) = protein histidine + sugar phosphate(in). This differs from primary and secondary active transport in that the solute is modified during transport.	MF	protein-N(PI)-phosphohistidine-sugar phosphotransferase activity
tig00001_114	GO:0005524	Interacting selectively and non-covalently with ATP, adenosine 5'-triphosphate, a universally important coenzyme and enzyme regulator.	MF	ATP binding
tig00001_114	GO:0003824	Catalysis of a biochemical reaction at physiological temperatures. In biologically catalyzed reactions, the reactants are known as substrates, and the catalysts are naturally occurring macromolecular substances known as enzymes. Enzymes possess specific binding sites for substrates, and are usually composed wholly or largely of protein, but RNA that has catalytic activity (ribozyme) is often also…	MF	catalytic activity
tig00001_114	GO:0004357	Catalysis of the reaction: L-cysteine + L-glutamate + ATP = L-gamma-glutamyl-L-cysteine + ADP + 2 H(+) + phosphate.	MF	glutamate-cysteine ligase activity
tig00001_1151	GO:0008982	Catalysis of the PEP-dependent, phosphoryl transfer-driven transport of substances across a membrane. The transport happens by catalysis of the reaction: protein N-phosphohistidine + sugar(out) = protein histidine + sugar phosphate(in). This differs from primary and secondary active transport in that the solute is modified during transport.	MF	protein-N(PI)-phosphohistidine-sugar phosphotransferase activity
tig00001_1152	GO:0005737	All of the contents of a cell excluding the plasma membrane and nucleus, but including other subcellular structures.	CC	cytoplasm
tig00001_1153	GO:0016832	Catalysis of the cleavage of a C-C bond in a molecule containing a hydroxyl group and a carbonyl group to form two smaller molecules, each being an aldehyde or a ketone.	MF	aldehyde-lyase activity
tig00001_1153	GO:0005975	The chemical reactions and pathways involving carbohydrates, any of a group of organic compounds based of the general formula Cx(H2O)y. Includes the formation of carbohydrate derivatives by the addition of a carbohydrate residue to another molecule.	BP	carbohydrate metabolic process
tig00001_1153	GO:0003824	Catalysis of a biochemical reaction at physiological temperatures. In biologically catalyzed reactions, the reactants are known as substrates, and the catalysts are naturally occurring macromolecular substances known as enzymes. Enzymes possess specific binding sites for substrates, and are usually composed wholly or largely of protein, but RNA that has catalytic activity (ribozyme) is often also…	MF	catalytic activity
tig00001_1154	GO:0003755	Catalysis of the reaction: peptidyl-proline (omega=180) = peptidyl-proline (omega=0).	MF	peptidyl-prolyl cis-trans isomerase activity
tig00001_1155	GO:0004222	Catalysis of the hydrolysis of internal, alpha-peptide bonds in a polypeptide chain by a mechanism in which water acts as a nucleophile, one or two metal ions hold the water molecule in place, and charged amino acid side chains are ligands for the metal ions.	MF	metalloendopeptidase activity
tig00001_1162	GO:0016787	Catalysis of the hydrolysis of various bonds, e.g. C-O, C-N, C-C, phosphoric anhydride bonds, etc. Hydrolase is the systematic name for any enzyme of EC class 3.	MF	hydrolase activity
tig00001_1164	GO:0003700	A protein or a member of a complex that interacts selectively and non-covalently with a specific DNA sequence (sometimes referred to as a motif) within the regulatory region of a gene to modulate transcription. Regulatory regions include promoters (proximal and distal) and enhancers. Genes are transcriptional units, and include bacterial operons.	MF	DNA-binding transcription factor activity
tig00001_1164	GO:0097367	Interacting selectively and non-covalently with a carbohydrate derivative.	MF	carbohydrate derivative binding
tig00001_1165	GO:0004616	Catalysis of the reaction: 6-phospho-D-gluconate + NADP+ = D-ribulose 5-phosphate + CO2 + NADPH + H+.	MF	phosphogluconate dehydrogenase (decarboxylating) activity
tig00001_1165	GO:0055114	A metabolic process that results in the removal or addition of one or more electrons to or from a substance, with or without the concomitant removal or addition of a proton or protons.	BP	oxidation-reduction process
tig00001_1165	GO:0050661	Interacting selectively and non-covalently with nicotinamide-adenine dinucleotide phosphate, a coenzyme involved in many redox and biosynthetic reactions; binding may be to either the oxidized form, NADP+, or the reduced form, NADPH.	MF	NADP binding
tig00001_1165	GO:0016491	Catalysis of an oxidation-reduction (redox) reaction, a reversible chemical reaction in which the oxidation state of an atom or atoms within a molecule is altered. One substrate acts as a hydrogen or electron donor and becomes oxidized, while the other acts as hydrogen or electron acceptor and becomes reduced.	MF	oxidoreductase activity
tig00001_1166	GO:0051287	Interacting selectively and non-covalently with nicotinamide adenine dinucleotide, a coenzyme involved in many redox and biosynthetic reactions; binding may be to either the oxidized form, NAD+, or the reduced form, NADH.	MF	NAD binding
tig00001_1166	GO:0016616	Catalysis of an oxidation-reduction (redox) reaction in which a CH-OH group acts as a hydrogen or electron donor and reduces NAD+ or NADP.	MF	oxidoreductase activity, acting on the CH-OH group of donors, NAD or NADP as acceptor
tig00001_1167	GO:0016614	Catalysis of an oxidation-reduction (redox) reaction in which a CH-OH group act as a hydrogen or electron donor and reduces a hydrogen or electron acceptor.	MF	oxidoreductase activity, acting on CH-OH group of donors
tig00001_1167	GO:0016491	Catalysis of an oxidation-reduction (redox) reaction, a reversible chemical reaction in which the oxidation state of an atom or atoms within a molecule is altered. One substrate acts as a hydrogen or electron donor and becomes oxidized, while the other acts as hydrogen or electron acceptor and becomes reduced.	MF	oxidoreductase activity
tig00001_1168	GO:0009401	The uptake and phosphorylation of specific carbohydrates from the extracellular environment; uptake and phosphorylation are coupled, making the PTS a link between the uptake and metabolism of sugars; phosphoenolpyruvate is the original phosphate donor; phosphoenolpyruvate passes the phosphate via a signal transduction pathway, to enzyme 1 (E1), which in turn passes it on to the histidine protein,…	BP	phosphoenolpyruvate-dependent sugar phosphotransferase system
tig00001_1169	GO:0009401	The uptake and phosphorylation of specific carbohydrates from the extracellular environment; uptake and phosphorylation are coupled, making the PTS a link between the uptake and metabolism of sugars; phosphoenolpyruvate is the original phosphate donor; phosphoenolpyruvate passes the phosphate via a signal transduction pathway, to enzyme 1 (E1), which in turn passes it on to the histidine protein,…	BP	phosphoenolpyruvate-dependent sugar phosphotransferase system
tig00001_116	GO:0016020	A lipid bilayer along with all the proteins and protein complexes embedded in it an attached to it.	CC	membrane
tig00001_1170	GO:0005737	All of the contents of a cell excluding the plasma membrane and nucleus, but including other subcellular structures.	CC	cytoplasm
tig00001_1172	GO:0009401	The uptake and phosphorylation of specific carbohydrates from the extracellular environment; uptake and phosphorylation are coupled, making the PTS a link between the uptake and metabolism of sugars; phosphoenolpyruvate is the original phosphate donor; phosphoenolpyruvate passes the phosphate via a signal transduction pathway, to enzyme 1 (E1), which in turn passes it on to the histidine protein,…	BP	phosphoenolpyruvate-dependent sugar phosphotransferase system
tig00001_1173	GO:0006064	The chemical reactions and pathways resulting in the breakdown of glucuronate, any salt or ester of glucuronic acid.	BP	glucuronate catabolic process
tig00001_1174	GO:0016787	Catalysis of the hydrolysis of various bonds, e.g. C-O, C-N, C-C, phosphoric anhydride bonds, etc. Hydrolase is the systematic name for any enzyme of EC class 3.	MF	hydrolase activity
tig00001_1176	GO:0003676	Interacting selectively and non-covalently with any nucleic acid.	MF	nucleic acid binding
tig00001_1179	GO:0003677	Any molecular function by which a gene product interacts selectively and non-covalently with DNA (deoxyribonucleic acid).	MF	DNA binding
tig00001_117	GO:0016020	A lipid bilayer along with all the proteins and protein complexes embedded in it an attached to it.	CC	membrane
tig00001_1183	GO:0016787	Catalysis of the hydrolysis of various bonds, e.g. C-O, C-N, C-C, phosphoric anhydride bonds, etc. Hydrolase is the systematic name for any enzyme of EC class 3.	MF	hydrolase activity
tig00001_1184	GO:0016757	Catalysis of the transfer of a glycosyl group from one compound (donor) to another (acceptor).	MF	transferase activity, transferring glycosyl groups
tig00001_1185	GO:0016757	Catalysis of the transfer of a glycosyl group from one compound (donor) to another (acceptor).	MF	transferase activity, transferring glycosyl groups
tig00001_1187	GO:0016020	A lipid bilayer along with all the proteins and protein complexes embedded in it an attached to it.	CC	membrane
tig00001_1188	GO:0055114	A metabolic process that results in the removal or addition of one or more electrons to or from a substance, with or without the concomitant removal or addition of a proton or protons.	BP	oxidation-reduction process
tig00001_1188	GO:0016491	Catalysis of an oxidation-reduction (redox) reaction, a reversible chemical reaction in which the oxidation state of an atom or atoms within a molecule is altered. One substrate acts as a hydrogen or electron donor and becomes oxidized, while the other acts as hydrogen or electron acceptor and becomes reduced.	MF	oxidoreductase activity
tig00001_118	GO:0005524	Interacting selectively and non-covalently with ATP, adenosine 5'-triphosphate, a universally important coenzyme and enzyme regulator.	MF	ATP binding
tig00001_1192	GO:0016021	The component of a membrane consisting of the gene products and protein complexes having at least some part of their peptide sequence embedded in the hydrophobic region of the membrane.	CC	integral component of membrane
tig00001_1194	GO:0003677	Any molecular function by which a gene product interacts selectively and non-covalently with DNA (deoxyribonucleic acid).	MF	DNA binding
tig00001_119	GO:0006826	The directed movement of iron (Fe) ions into, out of or within a cell, or between cells, by means of some agent such as a transporter or pore.	BP	iron ion transport
tig00001_11	GO:0003676	Interacting selectively and non-covalently with any nucleic acid.	MF	nucleic acid binding
tig00001_1200	GO:0016021	The component of a membrane consisting of the gene products and protein complexes having at least some part of their peptide sequence embedded in the hydrophobic region of the membrane.	CC	integral component of membrane
tig00001_1201	GO:0008519	Enables the transfer of ammonium from one side of a membrane to the other. Ammonium is the cation NH4+ which is formed from N2 by root-nodule bacteria in leguminous plants and is an excretory product in ammonotelic animals.	MF	ammonium transmembrane transporter activity
tig00001_1202	GO:0016020	A lipid bilayer along with all the proteins and protein complexes embedded in it an attached to it.	CC	membrane
tig00001_1203	GO:0004359	Catalysis of the reaction: L-glutamine + H2O = L-glutamate + NH3.	MF	glutaminase activity
tig00001_1205	GO:0003824	Catalysis of a biochemical reaction at physiological temperatures. In biologically catalyzed reactions, the reactants are known as substrates, and the catalysts are naturally occurring macromolecular substances known as enzymes. Enzymes possess specific binding sites for substrates, and are usually composed wholly or largely of protein, but RNA that has catalytic activity (ribozyme) is often also…	MF	catalytic activity
tig00001_1205	GO:0008661	Catalysis of the reaction: D-glyceraldehyde 3-phosphate + H(+) + pyruvate = 1-deoxy-D-xylulose 5-phosphate + CO(2).	MF	1-deoxy-D-xylulose-5-phosphate synthase activity
tig00001_1207	GO:0006051	The chemical reactions and pathways involving N-acetylmannosamine, the acetylated derivative of mannosamine, 2-amino-2-deoxymannose.	BP	N-acetylmannosamine metabolic process
tig00001_1207	GO:0003824	Catalysis of a biochemical reaction at physiological temperatures. In biologically catalyzed reactions, the reactants are known as substrates, and the catalysts are naturally occurring macromolecular substances known as enzymes. Enzymes possess specific binding sites for substrates, and are usually composed wholly or largely of protein, but RNA that has catalytic activity (ribozyme) is often also…	MF	catalytic activity
tig00001_1208	GO:0010181	Interacting selectively and non-covalently with flavin mono nucleotide. Flavin mono nucleotide (FMN) is the coenzyme or the prosthetic group of various flavoprotein oxidoreductase enzymes.	MF	FMN binding
tig00001_1210	GO:0016021	The component of a membrane consisting of the gene products and protein complexes having at least some part of their peptide sequence embedded in the hydrophobic region of the membrane.	CC	integral component of membrane
tig00001_1212	GO:0008658	Interacting selectively and non-covalently with penicillin, any antibiotic that contains the condensed beta-lactamthiazolidine ring system.	MF	penicillin binding
tig00001_1212	GO:0046677	Any process that results in a change in state or activity of a cell or an organism (in terms of movement, secretion, enzyme production, gene expression, etc.) as a result of an antibiotic stimulus. An antibiotic is a chemical substance produced by a microorganism which has the capacity to inhibit the growth of or to kill other microorganisms.	BP	response to antibiotic
tig00001_1213	GO:0006812	The directed movement of cations, atoms or small molecules with a net positive charge, into, out of or within a cell, or between cells, by means of some agent such as a transporter or pore.	BP	cation transport
tig00001_1216	GO:0016491	Catalysis of an oxidation-reduction (redox) reaction, a reversible chemical reaction in which the oxidation state of an atom or atoms within a molecule is altered. One substrate acts as a hydrogen or electron donor and becomes oxidized, while the other acts as hydrogen or electron acceptor and becomes reduced.	MF	oxidoreductase activity
tig00001_1216	GO:0000302	Any process that results in a change in state or activity of a cell or an organism (in terms of movement, secretion, enzyme production, gene expression, etc.) as a result of a reactive oxygen species stimulus. Reactive oxygen species include singlet oxygen, superoxide, and oxygen free radicals.	BP	response to reactive oxygen species
tig00001_1216	GO:0009055	Any molecular entity that serves as an electron acceptor and electron donor in an electron transport chain. An electron transport chain is a process in which a series of electron carriers operate together to transfer electrons from donors to any of several different terminal electron acceptors to generate a transmembrane electrochemical gradient.	MF	electron transfer activity
tig00001_1217	GO:0006979	Any process that results in a change in state or activity of a cell or an organism (in terms of movement, secretion, enzyme production, gene expression, etc.) as a result of oxidative stress, a state often resulting from exposure to high levels of reactive oxygen species, e.g. superoxide anions, hydrogen peroxide (H2O2), and hydroxyl radicals.	BP	response to oxidative stress
tig00001_1217	GO:0016209	Inhibition of the reactions brought about by dioxygen (O2) or peroxides. Usually the antioxidant is effective because it can itself be more easily oxidized than the substance protected. The term is often applied to components that can trap free radicals, thereby breaking the chain reaction that normally leads to extensive biological damage.	MF	antioxidant activity
tig00001_1218	GO:0003700	A protein or a member of a complex that interacts selectively and non-covalently with a specific DNA sequence (sometimes referred to as a motif) within the regulatory region of a gene to modulate transcription. Regulatory regions include promoters (proximal and distal) and enhancers. Genes are transcriptional units, and include bacterial operons.	MF	DNA-binding transcription factor activity
tig00001_1219	GO:0016491	Catalysis of an oxidation-reduction (redox) reaction, a reversible chemical reaction in which the oxidation state of an atom or atoms within a molecule is altered. One substrate acts as a hydrogen or electron donor and becomes oxidized, while the other acts as hydrogen or electron acceptor and becomes reduced.	MF	oxidoreductase activity
tig00001_1219	GO:0055114	A metabolic process that results in the removal or addition of one or more electrons to or from a substance, with or without the concomitant removal or addition of a proton or protons.	BP	oxidation-reduction process
tig00001_1220	GO:0006064	The chemical reactions and pathways resulting in the breakdown of glucuronate, any salt or ester of glucuronic acid.	BP	glucuronate catabolic process
tig00001_1224	GO:0003700	A protein or a member of a complex that interacts selectively and non-covalently with a specific DNA sequence (sometimes referred to as a motif) within the regulatory region of a gene to modulate transcription. Regulatory regions include promoters (proximal and distal) and enhancers. Genes are transcriptional units, and include bacterial operons.	MF	DNA-binding transcription factor activity
tig00001_1225	GO:0006979	Any process that results in a change in state or activity of a cell or an organism (in terms of movement, secretion, enzyme production, gene expression, etc.) as a result of oxidative stress, a state often resulting from exposure to high levels of reactive oxygen species, e.g. superoxide anions, hydrogen peroxide (H2O2), and hydroxyl radicals.	BP	response to oxidative stress
tig00001_1228	GO:0003824	Catalysis of a biochemical reaction at physiological temperatures. In biologically catalyzed reactions, the reactants are known as substrates, and the catalysts are naturally occurring macromolecular substances known as enzymes. Enzymes possess specific binding sites for substrates, and are usually composed wholly or largely of protein, but RNA that has catalytic activity (ribozyme) is often also…	MF	catalytic activity
tig00001_1228	GO:0004553	Catalysis of the hydrolysis of any O-glycosyl bond.	MF	hydrolase activity, hydrolyzing O-glycosyl compounds
tig00001_1230	GO:0016020	A lipid bilayer along with all the proteins and protein complexes embedded in it an attached to it.	CC	membrane
tig00001_1231	GO:0016020	A lipid bilayer along with all the proteins and protein complexes embedded in it an attached to it.	CC	membrane
tig00001_1233	GO:0008610	The chemical reactions and pathways resulting in the formation of lipids, compounds soluble in an organic solvent but not, or sparingly, in an aqueous solvent.	BP	lipid biosynthetic process
tig00001_1235	GO:0004152	Catalysis of the reaction: (S)-dihydroorotate + A = AH(2) + orotate.	MF	dihydroorotate dehydrogenase activity
tig00001_1235	GO:0003824	Catalysis of a biochemical reaction at physiological temperatures. In biologically catalyzed reactions, the reactants are known as substrates, and the catalysts are naturally occurring macromolecular substances known as enzymes. Enzymes possess specific binding sites for substrates, and are usually composed wholly or largely of protein, but RNA that has catalytic activity (ribozyme) is often also…	MF	catalytic activity
tig00001_1235	GO:0005737	All of the contents of a cell excluding the plasma membrane and nucleus, but including other subcellular structures.	CC	cytoplasm
tig00001_1236	GO:0016787	Catalysis of the hydrolysis of various bonds, e.g. C-O, C-N, C-C, phosphoric anhydride bonds, etc. Hydrolase is the systematic name for any enzyme of EC class 3.	MF	hydrolase activity
tig00001_1238	GO:0016020	A lipid bilayer along with all the proteins and protein complexes embedded in it an attached to it.	CC	membrane
tig00001_1238	GO:0016021	The component of a membrane consisting of the gene products and protein complexes having at least some part of their peptide sequence embedded in the hydrophobic region of the membrane.	CC	integral component of membrane
tig00001_123	GO:0016787	Catalysis of the hydrolysis of various bonds, e.g. C-O, C-N, C-C, phosphoric anhydride bonds, etc. Hydrolase is the systematic name for any enzyme of EC class 3.	MF	hydrolase activity
tig00001_1241	GO:0008080	Catalysis of the transfer of an acetyl group to a nitrogen atom on the acceptor molecule.	MF	N-acetyltransferase activity
tig00001_1243	GO:0005337	Enables the transfer of a nucleoside, a nucleobase linked to either beta-D-ribofuranose (ribonucleoside) or 2-deoxy-beta-D-ribofuranose, (a deoxyribonucleotide) from one side of a membrane to the other.	MF	nucleoside transmembrane transporter activity
tig00001_1250	GO:0006812	The directed movement of cations, atoms or small molecules with a net positive charge, into, out of or within a cell, or between cells, by means of some agent such as a transporter or pore.	BP	cation transport
tig00001_1250	GO:0008324	Enables the transfer of cation from one side of a membrane to the other.	MF	cation transmembrane transporter activity
tig00001_1253	GO:0016020	A lipid bilayer along with all the proteins and protein complexes embedded in it an attached to it.	CC	membrane
tig00001_1256	GO:0005524	Interacting selectively and non-covalently with ATP, adenosine 5'-triphosphate, a universally important coenzyme and enzyme regulator.	MF	ATP binding
tig00001_1257	GO:0003824	Catalysis of a biochemical reaction at physiological temperatures. In biologically catalyzed reactions, the reactants are known as substrates, and the catalysts are naturally occurring macromolecular substances known as enzymes. Enzymes possess specific binding sites for substrates, and are usually composed wholly or largely of protein, but RNA that has catalytic activity (ribozyme) is often also…	MF	catalytic activity
tig00001_1259	GO:0016020	A lipid bilayer along with all the proteins and protein complexes embedded in it an attached to it.	CC	membrane
tig00001_1260	GO:0008972	Catalysis of the reaction: ATP + 4-amino-2-methyl-5-phosphomethylpyrimidine = ADP + 4-amino-2-methyl-5-diphosphomethylpyrimidine.	MF	phosphomethylpyrimidine kinase activity
tig00001_1262	GO:0003677	Any molecular function by which a gene product interacts selectively and non-covalently with DNA (deoxyribonucleic acid).	MF	DNA binding
tig00001_1264	GO:0016310	The process of introducing a phosphate group into a molecule, usually with the formation of a phosphoric ester, a phosphoric anhydride or a phosphoric amide.	BP	phosphorylation
tig00001_1264	GO:0000155	Catalysis of the phosphorylation of a histidine residue in response to detection of an extracellular signal such as a chemical ligand or change in environment, to initiate a change in cell state or activity. The two-component sensor is a histidine kinase that autophosphorylates a histidine residue in its active site. The phosphate is then transferred to an aspartate residue in a downstream respon…	MF	phosphorelay sensor kinase activity
tig00001_1265	GO:0000160	A conserved series of molecular signals found in prokaryotes and eukaryotes; involves autophosphorylation of a histidine kinase and the transfer of the phosphate group to an aspartate that then acts as a phospho-donor to response regulator proteins.	BP	phosphorelay signal transduction system
tig00001_1265	GO:0003677	Any molecular function by which a gene product interacts selectively and non-covalently with DNA (deoxyribonucleic acid).	MF	DNA binding
tig00001_1266	GO:0016020	A lipid bilayer along with all the proteins and protein complexes embedded in it an attached to it.	CC	membrane
tig00001_1267	GO:0005524	Interacting selectively and non-covalently with ATP, adenosine 5'-triphosphate, a universally important coenzyme and enzyme regulator.	MF	ATP binding
tig00001_1268	GO:0003677	Any molecular function by which a gene product interacts selectively and non-covalently with DNA (deoxyribonucleic acid).	MF	DNA binding
tig00001_1272	GO:0004420	Catalysis of the reaction: (R)-mevalonate + CoA + 2 NADP(+) = (S)-3-hydroxy-3-methylglutaryl-CoA + 2 H(+) + 2 NADPH.	MF	hydroxymethylglutaryl-CoA reductase (NADPH) activity
tig00001_1272	GO:0016491	Catalysis of an oxidation-reduction (redox) reaction, a reversible chemical reaction in which the oxidation state of an atom or atoms within a molecule is altered. One substrate acts as a hydrogen or electron donor and becomes oxidized, while the other acts as hydrogen or electron acceptor and becomes reduced.	MF	oxidoreductase activity
tig00001_1274	GO:0006355	Any process that modulates the frequency, rate or extent of cellular DNA-templated transcription.	BP	regulation of transcription, DNA-templated
tig00001_1274	GO:0008982	Catalysis of the PEP-dependent, phosphoryl transfer-driven transport of substances across a membrane. The transport happens by catalysis of the reaction: protein N-phosphohistidine + sugar(out) = protein histidine + sugar phosphate(in). This differs from primary and secondary active transport in that the solute is modified during transport.	MF	protein-N(PI)-phosphohistidine-sugar phosphotransferase activity
tig00001_1275	GO:0008982	Catalysis of the PEP-dependent, phosphoryl transfer-driven transport of substances across a membrane. The transport happens by catalysis of the reaction: protein N-phosphohistidine + sugar(out) = protein histidine + sugar phosphate(in). This differs from primary and secondary active transport in that the solute is modified during transport.	MF	protein-N(PI)-phosphohistidine-sugar phosphotransferase activity
tig00001_1276	GO:0009401	The uptake and phosphorylation of specific carbohydrates from the extracellular environment; uptake and phosphorylation are coupled, making the PTS a link between the uptake and metabolism of sugars; phosphoenolpyruvate is the original phosphate donor; phosphoenolpyruvate passes the phosphate via a signal transduction pathway, to enzyme 1 (E1), which in turn passes it on to the histidine protein,…	BP	phosphoenolpyruvate-dependent sugar phosphotransferase system
tig00001_1277	GO:0005975	The chemical reactions and pathways involving carbohydrates, any of a group of organic compounds based of the general formula Cx(H2O)y. Includes the formation of carbohydrate derivatives by the addition of a carbohydrate residue to another molecule.	BP	carbohydrate metabolic process
tig00001_1279	GO:0022857	Enables the transfer of a substance, usually a specific substance or a group of related substances, from one side of a membrane to the other.	MF	transmembrane transporter activity
tig00001_1280	GO:0003700	A protein or a member of a complex that interacts selectively and non-covalently with a specific DNA sequence (sometimes referred to as a motif) within the regulatory region of a gene to modulate transcription. Regulatory regions include promoters (proximal and distal) and enhancers. Genes are transcriptional units, and include bacterial operons.	MF	DNA-binding transcription factor activity
tig00001_1282	GO:0016616	Catalysis of an oxidation-reduction (redox) reaction in which a CH-OH group acts as a hydrogen or electron donor and reduces NAD+ or NADP.	MF	oxidoreductase activity, acting on the CH-OH group of donors, NAD or NADP as acceptor
tig00001_1282	GO:0003824	Catalysis of a biochemical reaction at physiological temperatures. In biologically catalyzed reactions, the reactants are known as substrates, and the catalysts are naturally occurring macromolecular substances known as enzymes. Enzymes possess specific binding sites for substrates, and are usually composed wholly or largely of protein, but RNA that has catalytic activity (ribozyme) is often also…	MF	catalytic activity
tig00001_1282	GO:0004459	Catalysis of the reaction: (S)-lactate + NAD+ = pyruvate + NADH + H+.	MF	L-lactate dehydrogenase activity
tig00001_1282	GO:0016491	Catalysis of an oxidation-reduction (redox) reaction, a reversible chemical reaction in which the oxidation state of an atom or atoms within a molecule is altered. One substrate acts as a hydrogen or electron donor and becomes oxidized, while the other acts as hydrogen or electron acceptor and becomes reduced.	MF	oxidoreductase activity
tig00001_1283	GO:0016301	Catalysis of the transfer of a phosphate group, usually from ATP, to a substrate molecule.	MF	kinase activity
tig00001_1286	GO:0003677	Any molecular function by which a gene product interacts selectively and non-covalently with DNA (deoxyribonucleic acid).	MF	DNA binding
tig00001_1286	GO:0003917	Catalysis of a DNA topological transformation by transiently cleaving one DNA strand at a time to allow passage of another strand; changes the linking number by +1 per catalytic cycle.	MF	DNA topoisomerase type I activity
tig00001_1289	GO:0004764	Catalysis of the reaction: shikimate + NADP+ = 3-dehydroshikimate + NADPH + H+.	MF	shikimate 3-dehydrogenase (NADP+) activity
tig00001_128	GO:0015267	Enables the energy-independent facilitated diffusion, mediated by passage of a solute through a transmembrane aqueous pore or channel. Stereospecificity is not exhibited but this transport may be specific for a particular molecular species or class of molecules.	MF	channel activity
tig00001_1290	GO:0005524	Interacting selectively and non-covalently with ATP, adenosine 5'-triphosphate, a universally important coenzyme and enzyme regulator.	MF	ATP binding
tig00001_1291	GO:0016021	The component of a membrane consisting of the gene products and protein complexes having at least some part of their peptide sequence embedded in the hydrophobic region of the membrane.	CC	integral component of membrane
tig00001_1294	GO:0072344	A process of translational elongation that takes place when a ribosome has stalled during translation, and results in freeing the ribosome from the stalled translation complex.	BP	rescue of stalled ribosome
tig00001_1295	GO:0003700	A protein or a member of a complex that interacts selectively and non-covalently with a specific DNA sequence (sometimes referred to as a motif) within the regulatory region of a gene to modulate transcription. Regulatory regions include promoters (proximal and distal) and enhancers. Genes are transcriptional units, and include bacterial operons.	MF	DNA-binding transcription factor activity
tig00001_1296	GO:0004089	Catalysis of the reaction: H2CO3 = CO2 + H2O.	MF	carbonate dehydratase activity
tig00001_1298	GO:0009116	The chemical reactions and pathways involving a nucleoside, a nucleobase linked to either beta-D-ribofuranose (a ribonucleoside) or 2-deoxy-beta-D-ribofuranose, (a deoxyribonucleoside), e.g. adenosine, guanosine, inosine, cytidine, uridine and deoxyadenosine, deoxyguanosine, deoxycytidine and thymidine (= deoxythymidine).	BP	nucleoside metabolic process
tig00001_1298	GO:0004588	Catalysis of the reaction: orotidine 5'-phosphate + diphosphate = orotate + 5-phospho-alpha-D-ribose 1-diphosphate.	MF	orotate phosphoribosyltransferase activity
tig00001_1299	GO:0004590	Catalysis of the reaction: H(+) + orotidine 5'-phosphate = CO(2) + UMP.	MF	orotidine-5'-phosphate decarboxylase activity
tig00001_1299	GO:0003824	Catalysis of a biochemical reaction at physiological temperatures. In biologically catalyzed reactions, the reactants are known as substrates, and the catalysts are naturally occurring macromolecular substances known as enzymes. Enzymes possess specific binding sites for substrates, and are usually composed wholly or largely of protein, but RNA that has catalytic activity (ribozyme) is often also…	MF	catalytic activity
tig00001_129	GO:0016021	The component of a membrane consisting of the gene products and protein complexes having at least some part of their peptide sequence embedded in the hydrophobic region of the membrane.	CC	integral component of membrane
tig00001_12	GO:0003735	The action of a molecule that contributes to the structural integrity of the ribosome.	MF	structural constituent of ribosome
tig00001_1300	GO:0004152	Catalysis of the reaction: (S)-dihydroorotate + A = AH(2) + orotate.	MF	dihydroorotate dehydrogenase activity
tig00001_1300	GO:0003824	Catalysis of a biochemical reaction at physiological temperatures. In biologically catalyzed reactions, the reactants are known as substrates, and the catalysts are naturally occurring macromolecular substances known as enzymes. Enzymes possess specific binding sites for substrates, and are usually composed wholly or largely of protein, but RNA that has catalytic activity (ribozyme) is often also…	MF	catalytic activity
tig00001_1300	GO:0005737	All of the contents of a cell excluding the plasma membrane and nucleus, but including other subcellular structures.	CC	cytoplasm
tig00001_1301	GO:0006221	The chemical reactions and pathways resulting in the formation of a pyrimidine nucleotide, a compound consisting of nucleoside (a pyrimidine base linked to a deoxyribose or ribose sugar) esterified with a phosphate group at either the 3' or 5'-hydroxyl group of the sugar.	BP	pyrimidine nucleotide biosynthetic process
tig00001_1301	GO:0016491	Catalysis of an oxidation-reduction (redox) reaction, a reversible chemical reaction in which the oxidation state of an atom or atoms within a molecule is altered. One substrate acts as a hydrogen or electron donor and becomes oxidized, while the other acts as hydrogen or electron acceptor and becomes reduced.	MF	oxidoreductase activity
tig00001_1302	GO:0005524	Interacting selectively and non-covalently with ATP, adenosine 5'-triphosphate, a universally important coenzyme and enzyme regulator.	MF	ATP binding
tig00001_1302	GO:0006807	The chemical reactions and pathways involving organic or inorganic compounds that contain nitrogen.	BP	nitrogen compound metabolic process
tig00001_1303	GO:0004088	Catalysis of the reaction: 2 ATP + L-glutamine + CO2 + H2O = 2 ADP + phosphate + glutamate + carbamoyl phosphate.	MF	carbamoyl-phosphate synthase (glutamine-hydrolyzing) activity
tig00001_1304	GO:0016810	Catalysis of the hydrolysis of any carbon-nitrogen bond, C-N, with the exception of peptide bonds.	MF	hydrolase activity, acting on carbon-nitrogen (but not peptide) bonds
tig00001_1304	GO:0016812	Catalysis of the hydrolysis of any non-peptide carbon-nitrogen bond in a cyclic amide.	MF	hydrolase activity, acting on carbon-nitrogen (but not peptide) bonds, in cyclic amides
tig00001_1304	GO:0016787	Catalysis of the hydrolysis of various bonds, e.g. C-O, C-N, C-C, phosphoric anhydride bonds, etc. Hydrolase is the systematic name for any enzyme of EC class 3.	MF	hydrolase activity
tig00001_1304	GO:0004151	Catalysis of the reaction: (S)-dihydroorotate + H(2)O = N-carbamoyl-L-aspartate + H(+).	MF	dihydroorotase activity
tig00001_1305	GO:0006520	The chemical reactions and pathways involving amino acids, carboxylic acids containing one or more amino groups, as carried out by individual cells.	BP	cellular amino acid metabolic process
tig00001_1305	GO:0004070	Catalysis of the reaction: L-aspartate + carbamoyl phosphate = N-carbamoyl-L-aspartate + H(+) + phosphate.	MF	aspartate carbamoyltransferase activity
tig00001_1306	GO:0016020	A lipid bilayer along with all the proteins and protein complexes embedded in it an attached to it.	CC	membrane
tig00001_1306	GO:0015210	Enables the transfer of uracil, 2,4-dioxopyrimidine, from one side of a membrane to the other.	MF	uracil transmembrane transporter activity
tig00001_1307	GO:0009116	The chemical reactions and pathways involving a nucleoside, a nucleobase linked to either beta-D-ribofuranose (a ribonucleoside) or 2-deoxy-beta-D-ribofuranose, (a deoxyribonucleoside), e.g. adenosine, guanosine, inosine, cytidine, uridine and deoxyadenosine, deoxyguanosine, deoxycytidine and thymidine (= deoxythymidine).	BP	nucleoside metabolic process
tig00001_1308	GO:0003723	Interacting selectively and non-covalently with an RNA molecule or a portion thereof.	MF	RNA binding
tig00001_1308	GO:0001522	The intramolecular conversion of uridine to pseudouridine within an RNA molecule. This posttranscriptional base modification occurs in tRNA, rRNA, and snRNAs.	BP	pseudouridine synthesis
tig00001_1309	GO:0004190	Catalysis of the hydrolysis of internal, alpha-peptide bonds in a polypeptide chain by a mechanism in which a water molecule bound by the side chains of aspartic residues at the active center acts as a nucleophile.	MF	aspartic-type endopeptidase activity
tig00001_1312	GO:0004329	Catalysis of the reaction: ATP + formate + tetrahydrofolate = ADP + phosphate + 10-formyltetrahydrofolate.	MF	formate-tetrahydrofolate ligase activity
tig00001_1312	GO:0005524	Interacting selectively and non-covalently with ATP, adenosine 5'-triphosphate, a universally important coenzyme and enzyme regulator.	MF	ATP binding
tig00001_1313	GO:0003676	Interacting selectively and non-covalently with any nucleic acid.	MF	nucleic acid binding
tig00001_1315	GO:0003676	Interacting selectively and non-covalently with any nucleic acid.	MF	nucleic acid binding
tig00001_1316	GO:0006812	The directed movement of cations, atoms or small molecules with a net positive charge, into, out of or within a cell, or between cells, by means of some agent such as a transporter or pore.	BP	cation transport
tig00001_1317	GO:0022857	Enables the transfer of a substance, usually a specific substance or a group of related substances, from one side of a membrane to the other.	MF	transmembrane transporter activity
tig00001_1318	GO:0004812	Catalysis of the formation of aminoacyl-tRNA from ATP, amino acid, and tRNA with the release of diphosphate and AMP.	MF	aminoacyl-tRNA ligase activity
tig00001_1318	GO:0000166	Interacting selectively and non-covalently with a nucleotide, any compound consisting of a nucleoside that is esterified with (ortho)phosphate or an oligophosphate at any hydroxyl group on the ribose or deoxyribose.	MF	nucleotide binding
tig00001_1318	GO:0004813	Catalysis of the reaction: ATP + L-alanine + tRNA(Ala) = AMP + diphosphate + L-alanyl-tRNA(Ala).	MF	alanine-tRNA ligase activity
tig00001_1318	GO:0003676	Interacting selectively and non-covalently with any nucleic acid.	MF	nucleic acid binding
tig00001_1319	GO:0008080	Catalysis of the transfer of an acetyl group to a nitrogen atom on the acceptor molecule.	MF	N-acetyltransferase activity
tig00001_1319	GO:0004343	Catalysis of the reaction: D-glucosamine 6-phosphate + acetyl-CoA = N-acetyl-D-glucosamine 6-phosphate + CoA + H(+).	MF	glucosamine 6-phosphate N-acetyltransferase activity
tig00001_1320	GO:0004386	Catalysis of the reaction: NTP + H2O = NDP + phosphate, to drive the unwinding of a DNA or RNA helix.	MF	helicase activity
tig00001_1320	GO:0003676	Interacting selectively and non-covalently with any nucleic acid.	MF	nucleic acid binding
tig00001_1324	GO:0016020	A lipid bilayer along with all the proteins and protein complexes embedded in it an attached to it.	CC	membrane
tig00001_1326	GO:0003824	Catalysis of a biochemical reaction at physiological temperatures. In biologically catalyzed reactions, the reactants are known as substrates, and the catalysts are naturally occurring macromolecular substances known as enzymes. Enzymes possess specific binding sites for substrates, and are usually composed wholly or largely of protein, but RNA that has catalytic activity (ribozyme) is often also…	MF	catalytic activity
tig00001_1327	GO:0009058	The chemical reactions and pathways resulting in the formation of substances; typically the energy-requiring part of metabolism in which simpler substances are transformed into more complex ones.	BP	biosynthetic process
tig00001_1327	GO:0003824	Catalysis of a biochemical reaction at physiological temperatures. In biologically catalyzed reactions, the reactants are known as substrates, and the catalysts are naturally occurring macromolecular substances known as enzymes. Enzymes possess specific binding sites for substrates, and are usually composed wholly or largely of protein, but RNA that has catalytic activity (ribozyme) is often also…	MF	catalytic activity
tig00001_1327	GO:0016740	Catalysis of the transfer of a group, e.g. a methyl group, glycosyl group, acyl group, phosphorus-containing, or other groups, from one compound (generally regarded as the donor) to another compound (generally regarded as the acceptor). Transferase is the systematic name for any enzyme of EC class 2.	MF	transferase activity
tig00001_1330	GO:0004181	Catalysis of the hydrolysis of C-terminal amino acid residues from a polypeptide chain by a mechanism in which water acts as a nucleophile, one or two metal ions hold the water molecule in place, and charged amino acid side chains are ligands for the metal ions.	MF	metallocarboxypeptidase activity
tig00001_1331	GO:0003723	Interacting selectively and non-covalently with an RNA molecule or a portion thereof.	MF	RNA binding
tig00001_1331	GO:0003676	Interacting selectively and non-covalently with any nucleic acid.	MF	nucleic acid binding
tig00001_1334	GO:0006281	The process of restoring DNA after damage. Genomes are subject to damage by chemical and physical agents in the environment (e.g. UV and ionizing radiations, chemical mutagens, fungal and bacterial toxins, etc.) and by free radicals or alkylating agents endogenously generated in metabolism. DNA is also damaged because of errors during its replication. A variety of different DNA repair pathways ha…	BP	DNA repair
tig00001_1334	GO:0003676	Interacting selectively and non-covalently with any nucleic acid.	MF	nucleic acid binding
tig00001_1335	GO:0008658	Interacting selectively and non-covalently with penicillin, any antibiotic that contains the condensed beta-lactamthiazolidine ring system.	MF	penicillin binding
tig00001_1336	GO:0003677	Any molecular function by which a gene product interacts selectively and non-covalently with DNA (deoxyribonucleic acid).	MF	DNA binding
tig00001_1337	GO:0003677	Any molecular function by which a gene product interacts selectively and non-covalently with DNA (deoxyribonucleic acid).	MF	DNA binding
tig00001_1339	GO:0006284	In base excision repair, an altered base is removed by a DNA glycosylase enzyme, followed by excision of the resulting sugar phosphate. The small gap left in the DNA helix is filled in by the sequential action of DNA polymerase and DNA ligase.	BP	base-excision repair
tig00001_1339	GO:0051539	Interacting selectively and non-covalently with a 4 iron, 4 sulfur (4Fe-4S) cluster; this cluster consists of four iron atoms, with the inorganic sulfur atoms found between the irons and acting as bridging ligands.	MF	4 iron, 4 sulfur cluster binding
tig00001_1339	GO:0003906	Catalysis of the cleavage of the C-O-P bond in the AP site created when DNA glycosylase removes a damaged base, involved in the DNA base excision repair pathway (BER).	MF	DNA-(apurinic or apyrimidinic site) endonuclease activity
tig00001_1339	GO:0003677	Any molecular function by which a gene product interacts selectively and non-covalently with DNA (deoxyribonucleic acid).	MF	DNA binding
tig00001_1339	GO:0003824	Catalysis of a biochemical reaction at physiological temperatures. In biologically catalyzed reactions, the reactants are known as substrates, and the catalysts are naturally occurring macromolecular substances known as enzymes. Enzymes possess specific binding sites for substrates, and are usually composed wholly or largely of protein, but RNA that has catalytic activity (ribozyme) is often also…	MF	catalytic activity
tig00001_133	GO:0055114	A metabolic process that results in the removal or addition of one or more electrons to or from a substance, with or without the concomitant removal or addition of a proton or protons.	BP	oxidation-reduction process
tig00001_133	GO:0016491	Catalysis of an oxidation-reduction (redox) reaction, a reversible chemical reaction in which the oxidation state of an atom or atoms within a molecule is altered. One substrate acts as a hydrogen or electron donor and becomes oxidized, while the other acts as hydrogen or electron acceptor and becomes reduced.	MF	oxidoreductase activity
tig00001_1341	GO:0022857	Enables the transfer of a substance, usually a specific substance or a group of related substances, from one side of a membrane to the other.	MF	transmembrane transporter activity
tig00001_1342	GO:0003700	A protein or a member of a complex that interacts selectively and non-covalently with a specific DNA sequence (sometimes referred to as a motif) within the regulatory region of a gene to modulate transcription. Regulatory regions include promoters (proximal and distal) and enhancers. Genes are transcriptional units, and include bacterial operons.	MF	DNA-binding transcription factor activity
tig00001_1344	GO:0016491	Catalysis of an oxidation-reduction (redox) reaction, a reversible chemical reaction in which the oxidation state of an atom or atoms within a molecule is altered. One substrate acts as a hydrogen or electron donor and becomes oxidized, while the other acts as hydrogen or electron acceptor and becomes reduced.	MF	oxidoreductase activity
tig00001_1344	GO:0045454	Any process that maintains the redox environment of a cell or compartment within a cell.	BP	cell redox homeostasis
tig00001_1345	GO:0003700	A protein or a member of a complex that interacts selectively and non-covalently with a specific DNA sequence (sometimes referred to as a motif) within the regulatory region of a gene to modulate transcription. Regulatory regions include promoters (proximal and distal) and enhancers. Genes are transcriptional units, and include bacterial operons.	MF	DNA-binding transcription factor activity
tig00001_1346	GO:0004124	Catalysis of the reaction: O3-acetyl-L-serine + hydrogen sulfide = L-cysteine + acetate.	MF	cysteine synthase activity
tig00001_1346	GO:0006535	The chemical reactions and pathways resulting in the formation of cysteine from other compounds, including serine.	BP	cysteine biosynthetic process from serine
tig00001_1347	GO:0004040	Catalysis of the reaction: a monocarboxylic acid amide + H2O = a monocarboxylate + NH3.	MF	amidase activity
tig00001_1348	GO:0004802	Catalysis of the reversible transfer of a 2-carbon ketol group (CH2OH-CO-) from a ketose phosphate donor to an aldose phosphate acceptor.	MF	transketolase activity
tig00001_1348	GO:0003824	Catalysis of a biochemical reaction at physiological temperatures. In biologically catalyzed reactions, the reactants are known as substrates, and the catalysts are naturally occurring macromolecular substances known as enzymes. Enzymes possess specific binding sites for substrates, and are usually composed wholly or largely of protein, but RNA that has catalytic activity (ribozyme) is often also…	MF	catalytic activity
tig00001_1350	GO:0004252	Catalysis of the hydrolysis of internal, alpha-peptide bonds in a polypeptide chain by a catalytic mechanism that involves a catalytic triad consisting of a serine nucleophile that is activated by a proton relay involving an acidic residue (e.g. aspartate or glutamate) and a basic residue (usually histidine).	MF	serine-type endopeptidase activity
tig00001_1350	GO:0003677	Any molecular function by which a gene product interacts selectively and non-covalently with DNA (deoxyribonucleic acid).	MF	DNA binding
tig00001_1352	GO:0009116	The chemical reactions and pathways involving a nucleoside, a nucleobase linked to either beta-D-ribofuranose (a ribonucleoside) or 2-deoxy-beta-D-ribofuranose, (a deoxyribonucleoside), e.g. adenosine, guanosine, inosine, cytidine, uridine and deoxyadenosine, deoxyguanosine, deoxycytidine and thymidine (= deoxythymidine).	BP	nucleoside metabolic process
tig00001_1352	GO:0003999	Catalysis of the reaction: AMP + diphosphate = adenine + 5-phospho-alpha-D-ribose 1-diphosphate.	MF	adenine phosphoribosyltransferase activity
tig00001_1353	GO:0003676	Interacting selectively and non-covalently with any nucleic acid.	MF	nucleic acid binding
tig00001_1353	GO:0006281	The process of restoring DNA after damage. Genomes are subject to damage by chemical and physical agents in the environment (e.g. UV and ionizing radiations, chemical mutagens, fungal and bacterial toxins, etc.) and by free radicals or alkylating agents endogenously generated in metabolism. DNA is also damaged because of errors during its replication. A variety of different DNA repair pathways ha…	BP	DNA repair
tig00001_1354	GO:0005887	The component of the plasma membrane consisting of the gene products and protein complexes having at least some part of their peptide sequence embedded in the hydrophobic region of the membrane.	CC	integral component of plasma membrane
tig00001_1355	GO:0055114	A metabolic process that results in the removal or addition of one or more electrons to or from a substance, with or without the concomitant removal or addition of a proton or protons.	BP	oxidation-reduction process
tig00001_1355	GO:0016491	Catalysis of an oxidation-reduction (redox) reaction, a reversible chemical reaction in which the oxidation state of an atom or atoms within a molecule is altered. One substrate acts as a hydrogen or electron donor and becomes oxidized, while the other acts as hydrogen or electron acceptor and becomes reduced.	MF	oxidoreductase activity
tig00001_1356	GO:0016891	Catalysis of the hydrolysis of ester linkages within ribonucleic acids by creating internal breaks to yield 5'-phosphomonoesters.	MF	endoribonuclease activity, producing 5'-phosphomonoesters
tig00001_1358	GO:0005525	Interacting selectively and non-covalently with GTP, guanosine triphosphate.	MF	GTP binding
tig00001_1358	GO:0000166	Interacting selectively and non-covalently with a nucleotide, any compound consisting of a nucleoside that is esterified with (ortho)phosphate or an oligophosphate at any hydroxyl group on the ribose or deoxyribose.	MF	nucleotide binding
tig00001_1358	GO:0000287	Interacting selectively and non-covalently with magnesium (Mg) ions.	MF	magnesium ion binding
tig00001_1359	GO:0016620	Catalysis of an oxidation-reduction (redox) reaction in which an aldehyde or ketone (oxo) group acts as a hydrogen or electron donor and reduces NAD or NADP.	MF	oxidoreductase activity, acting on the aldehyde or oxo group of donors, NAD or NADP as acceptor
tig00001_1359	GO:0006006	The chemical reactions and pathways involving glucose, the aldohexose gluco-hexose. D-glucose is dextrorotatory and is sometimes known as dextrose; it is an important source of energy for living organisms and is found free as well as combined in homo- and hetero-oligosaccharides and polysaccharides.	BP	glucose metabolic process
tig00001_135	GO:0005886	The membrane surrounding a cell that separates the cell from its external environment. It consists of a phospholipid bilayer and associated proteins.	CC	plasma membrane
tig00001_1361	GO:0003824	Catalysis of a biochemical reaction at physiological temperatures. In biologically catalyzed reactions, the reactants are known as substrates, and the catalysts are naturally occurring macromolecular substances known as enzymes. Enzymes possess specific binding sites for substrates, and are usually composed wholly or largely of protein, but RNA that has catalytic activity (ribozyme) is often also…	MF	catalytic activity
tig00001_1362	GO:0000413	The modification of a protein by cis-trans isomerization of a proline residue.	BP	protein peptidyl-prolyl isomerization
tig00001_1362	GO:0003755	Catalysis of the reaction: peptidyl-proline (omega=180) = peptidyl-proline (omega=0).	MF	peptidyl-prolyl cis-trans isomerase activity
tig00001_1363	GO:0006633	The chemical reactions and pathways resulting in the formation of a fatty acid, any of the aliphatic monocarboxylic acids that can be liberated by hydrolysis from naturally occurring fats and oils. Fatty acids are predominantly straight-chain acids of 4 to 24 carbon atoms, which may be saturated or unsaturated; branched fatty acids and hydroxy fatty acids also occur, and very long chain acids of …	BP	fatty acid biosynthetic process
tig00001_1364	GO:0004318	Catalysis of the reaction: acyl-[acyl-carrier protein] + NAD+ = trans-2,3-dehydroacyl-[acyl-carrier protein] + NADH + H+.	MF	enoyl-[acyl-carrier-protein] reductase (NADH) activity
tig00001_1364	GO:0055114	A metabolic process that results in the removal or addition of one or more electrons to or from a substance, with or without the concomitant removal or addition of a proton or protons.	BP	oxidation-reduction process
tig00001_1365	GO:0003824	Catalysis of a biochemical reaction at physiological temperatures. In biologically catalyzed reactions, the reactants are known as substrates, and the catalysts are naturally occurring macromolecular substances known as enzymes. Enzymes possess specific binding sites for substrates, and are usually composed wholly or largely of protein, but RNA that has catalytic activity (ribozyme) is often also…	MF	catalytic activity
tig00001_1365	GO:0004084	Catalysis of the reaction: a branched-chain amino acid + 2-oxoglutarate = L-glutamate + a 2-oxocarboxylate derived from the branched-chain amino acid.	MF	branched-chain-amino-acid transaminase activity
tig00001_1366	GO:0016020	A lipid bilayer along with all the proteins and protein complexes embedded in it an attached to it.	CC	membrane
tig00001_1369	GO:0009143	The chemical reactions and pathways resulting in the breakdown of a nucleoside triphosphate, a compound consisting of a nucleobase linked to a deoxyribose or ribose sugar esterified with triphosphate on the sugar.	BP	nucleoside triphosphate catabolic process
tig00001_1369	GO:0000049	Interacting selectively and non-covalently with transfer RNA.	MF	tRNA binding
tig00001_136	GO:0003723	Interacting selectively and non-covalently with an RNA molecule or a portion thereof.	MF	RNA binding
tig00001_136	GO:0003735	The action of a molecule that contributes to the structural integrity of the ribosome.	MF	structural constituent of ribosome
tig00001_136	GO:0019843	Interacting selectively and non-covalently with ribosomal RNA.	MF	rRNA binding
tig00001_1370	GO:0016855	Catalysis of a reaction that alters the configuration of one or more chiral centers in an amino acid.	MF	racemase and epimerase activity, acting on amino acids and derivatives
tig00001_1370	GO:0008881	Catalysis of the reaction: L-glutamate = D-glutamate.	MF	glutamate racemase activity
tig00001_1370	GO:0006807	The chemical reactions and pathways involving organic or inorganic compounds that contain nitrogen.	BP	nitrogen compound metabolic process
tig00001_1371	GO:0016020	A lipid bilayer along with all the proteins and protein complexes embedded in it an attached to it.	CC	membrane
tig00001_1371	GO:0016021	The component of a membrane consisting of the gene products and protein complexes having at least some part of their peptide sequence embedded in the hydrophobic region of the membrane.	CC	integral component of membrane
tig00001_1372	GO:0016020	A lipid bilayer along with all the proteins and protein complexes embedded in it an attached to it.	CC	membrane
tig00001_1372	GO:0016021	The component of a membrane consisting of the gene products and protein complexes having at least some part of their peptide sequence embedded in the hydrophobic region of the membrane.	CC	integral component of membrane
tig00001_1373	GO:0015276	Enables the transmembrane transfer of an ion by a channel that opens when a specific ligand has been bound by the channel complex or one of its constituent parts.	MF	ligand-gated ion channel activity
tig00001_1374	GO:0005524	Interacting selectively and non-covalently with ATP, adenosine 5'-triphosphate, a universally important coenzyme and enzyme regulator.	MF	ATP binding
tig00001_1374	GO:0003333	The process in which an amino acid is transported across a membrane.	BP	amino acid transmembrane transport
tig00001_1375	GO:0000166	Interacting selectively and non-covalently with a nucleotide, any compound consisting of a nucleoside that is esterified with (ortho)phosphate or an oligophosphate at any hydroxyl group on the ribose or deoxyribose.	MF	nucleotide binding
tig00001_1376	GO:0000287	Interacting selectively and non-covalently with magnesium (Mg) ions.	MF	magnesium ion binding
tig00001_1376	GO:0000049	Interacting selectively and non-covalently with transfer RNA.	MF	tRNA binding
tig00001_1376	GO:0003723	Interacting selectively and non-covalently with an RNA molecule or a portion thereof.	MF	RNA binding
tig00001_1377	GO:0000166	Interacting selectively and non-covalently with a nucleotide, any compound consisting of a nucleoside that is esterified with (ortho)phosphate or an oligophosphate at any hydroxyl group on the ribose or deoxyribose.	MF	nucleotide binding
tig00001_1377	GO:0000049	Interacting selectively and non-covalently with transfer RNA.	MF	tRNA binding
tig00001_1377	GO:0004826	Catalysis of the reaction: ATP + L-phenylalanine + tRNA(Phe) = AMP + diphosphate + L-phenylalanyl-tRNA(Phe).	MF	phenylalanine-tRNA ligase activity
tig00001_1379	GO:0005524	Interacting selectively and non-covalently with ATP, adenosine 5'-triphosphate, a universally important coenzyme and enzyme regulator.	MF	ATP binding
tig00001_1379	GO:0003678	Catalysis of the reaction: NTP + H2O = NDP + phosphate, to drive the unwinding of a DNA helix.	MF	DNA helicase activity
tig00001_1379	GO:0003677	Any molecular function by which a gene product interacts selectively and non-covalently with DNA (deoxyribonucleic acid).	MF	DNA binding
tig00001_1380	GO:0016788	Catalysis of the hydrolysis of any ester bond.	MF	hydrolase activity, acting on ester bonds
tig00001_1380	GO:0003677	Any molecular function by which a gene product interacts selectively and non-covalently with DNA (deoxyribonucleic acid).	MF	DNA binding
tig00001_1381	GO:0016020	A lipid bilayer along with all the proteins and protein complexes embedded in it an attached to it.	CC	membrane
tig00001_1381	GO:0006857	The directed movement of oligopeptides into, out of or within a cell, or between cells, by means of some agent such as a transporter or pore. Oligopeptides are molecules that contain a small number (2 to 20) of amino-acid residues connected by peptide linkages.	BP	oligopeptide transport
tig00001_1381	GO:0015833	The directed movement of peptides, compounds of two or more amino acids where the alpha carboxyl group of one is bound to the alpha amino group of another, into, out of or within a cell, or between cells, by means of some agent such as a transporter or pore.	BP	peptide transport
tig00001_1381	GO:0022857	Enables the transfer of a substance, usually a specific substance or a group of related substances, from one side of a membrane to the other.	MF	transmembrane transporter activity
tig00001_1382	GO:0016657	Catalysis of an oxidation-reduction (redox) reaction in which NADH or NADPH acts as a hydrogen or electron donor and reduces a nitrogenous group.	MF	oxidoreductase activity, acting on NAD(P)H, nitrogenous group as acceptor
tig00001_1382	GO:0016491	Catalysis of an oxidation-reduction (redox) reaction, a reversible chemical reaction in which the oxidation state of an atom or atoms within a molecule is altered. One substrate acts as a hydrogen or electron donor and becomes oxidized, while the other acts as hydrogen or electron acceptor and becomes reduced.	MF	oxidoreductase activity
tig00001_1385	GO:0003677	Any molecular function by which a gene product interacts selectively and non-covalently with DNA (deoxyribonucleic acid).	MF	DNA binding
tig00001_1386	GO:0003677	Any molecular function by which a gene product interacts selectively and non-covalently with DNA (deoxyribonucleic acid).	MF	DNA binding
tig00001_1398	GO:0008080	Catalysis of the transfer of an acetyl group to a nitrogen atom on the acceptor molecule.	MF	N-acetyltransferase activity
tig00001_139	GO:0016787	Catalysis of the hydrolysis of various bonds, e.g. C-O, C-N, C-C, phosphoric anhydride bonds, etc. Hydrolase is the systematic name for any enzyme of EC class 3.	MF	hydrolase activity
tig00001_13	GO:0003677	Any molecular function by which a gene product interacts selectively and non-covalently with DNA (deoxyribonucleic acid).	MF	DNA binding
tig00001_13	GO:0003678	Catalysis of the reaction: NTP + H2O = NDP + phosphate, to drive the unwinding of a DNA helix.	MF	DNA helicase activity
tig00001_1401	GO:0015074	The process in which a segment of DNA is incorporated into another, usually larger, DNA molecule such as a chromosome.	BP	DNA integration
tig00001_1404	GO:0003677	Any molecular function by which a gene product interacts selectively and non-covalently with DNA (deoxyribonucleic acid).	MF	DNA binding
tig00001_1408	GO:0003676	Interacting selectively and non-covalently with any nucleic acid.	MF	nucleic acid binding
tig00001_1408	GO:0003678	Catalysis of the reaction: NTP + H2O = NDP + phosphate, to drive the unwinding of a DNA helix.	MF	DNA helicase activity
tig00001_1408	GO:0005524	Interacting selectively and non-covalently with ATP, adenosine 5'-triphosphate, a universally important coenzyme and enzyme regulator.	MF	ATP binding
tig00001_1408	GO:0003677	Any molecular function by which a gene product interacts selectively and non-covalently with DNA (deoxyribonucleic acid).	MF	DNA binding
tig00001_1411	GO:0016020	A lipid bilayer along with all the proteins and protein complexes embedded in it an attached to it.	CC	membrane
tig00001_1412	GO:0000166	Interacting selectively and non-covalently with a nucleotide, any compound consisting of a nucleoside that is esterified with (ortho)phosphate or an oligophosphate at any hydroxyl group on the ribose or deoxyribose.	MF	nucleotide binding
tig00001_1412	GO:0016021	The component of a membrane consisting of the gene products and protein complexes having at least some part of their peptide sequence embedded in the hydrophobic region of the membrane.	CC	integral component of membrane
tig00001_1412	GO:0006812	The directed movement of cations, atoms or small molecules with a net positive charge, into, out of or within a cell, or between cells, by means of some agent such as a transporter or pore.	BP	cation transport
tig00001_1415	GO:0003723	Interacting selectively and non-covalently with an RNA molecule or a portion thereof.	MF	RNA binding
tig00001_1416	GO:0003677	Any molecular function by which a gene product interacts selectively and non-covalently with DNA (deoxyribonucleic acid).	MF	DNA binding
tig00001_1417	GO:0016021	The component of a membrane consisting of the gene products and protein complexes having at least some part of their peptide sequence embedded in the hydrophobic region of the membrane.	CC	integral component of membrane
tig00001_1418	GO:0008270	Interacting selectively and non-covalently with zinc (Zn) ions.	MF	zinc ion binding
tig00001_1418	GO:0004132	Catalysis of the reaction: dCMP + H2O = dUMP + NH3.	MF	dCMP deaminase activity
tig00001_1418	GO:0003824	Catalysis of a biochemical reaction at physiological temperatures. In biologically catalyzed reactions, the reactants are known as substrates, and the catalysts are naturally occurring macromolecular substances known as enzymes. Enzymes possess specific binding sites for substrates, and are usually composed wholly or largely of protein, but RNA that has catalytic activity (ribozyme) is often also…	MF	catalytic activity
tig00001_1421	GO:0003677	Any molecular function by which a gene product interacts selectively and non-covalently with DNA (deoxyribonucleic acid).	MF	DNA binding
tig00001_1422	GO:0004176	Catalysis of the reaction: ATP + H2O = ADP + phosphate, to drive the hydrolysis of peptide bonds.	MF	ATP-dependent peptidase activity
tig00001_1422	GO:0005515	Interacting selectively and non-covalently with any protein or protein complex (a complex of two or more proteins that may include other nonprotein molecules).	MF	protein binding
tig00001_1423	GO:0003824	Catalysis of a biochemical reaction at physiological temperatures. In biologically catalyzed reactions, the reactants are known as substrates, and the catalysts are naturally occurring macromolecular substances known as enzymes. Enzymes possess specific binding sites for substrates, and are usually composed wholly or largely of protein, but RNA that has catalytic activity (ribozyme) is often also…	MF	catalytic activity
tig00001_1423	GO:0004595	Catalysis of the reaction: ATP + pantetheine 4'-phosphate = 3'-dephospho-CoA + diphosphate.	MF	pantetheine-phosphate adenylyltransferase activity
tig00001_1424	GO:0003676	Interacting selectively and non-covalently with any nucleic acid.	MF	nucleic acid binding
tig00001_1424	GO:0008168	Catalysis of the transfer of a methyl group to an acceptor molecule.	MF	methyltransferase activity
tig00001_1428	GO:0005524	Interacting selectively and non-covalently with ATP, adenosine 5'-triphosphate, a universally important coenzyme and enzyme regulator.	MF	ATP binding
tig00001_1428	GO:0003824	Catalysis of a biochemical reaction at physiological temperatures. In biologically catalyzed reactions, the reactants are known as substrates, and the catalysts are naturally occurring macromolecular substances known as enzymes. Enzymes possess specific binding sites for substrates, and are usually composed wholly or largely of protein, but RNA that has catalytic activity (ribozyme) is often also…	MF	catalytic activity
tig00001_1428	GO:0004736	Catalysis of the reaction: ATP + bicarbonate + pyruvate = ADP + 2 H(+) + oxaloacetate + phosphate.	MF	pyruvate carboxylase activity
tig00001_1429	GO:0016021	The component of a membrane consisting of the gene products and protein complexes having at least some part of their peptide sequence embedded in the hydrophobic region of the membrane.	CC	integral component of membrane
tig00001_142	GO:0005524	Interacting selectively and non-covalently with ATP, adenosine 5'-triphosphate, a universally important coenzyme and enzyme regulator.	MF	ATP binding
tig00001_142	GO:0006298	A system for the correction of errors in which an incorrect base, which cannot form hydrogen bonds with the corresponding base in the parent strand, is incorporated into the daughter strand. The mismatch repair system promotes genomic fidelity by repairing base-base mismatches, insertion-deletion loops and heterologies generated during DNA replication and recombination.	BP	mismatch repair
tig00001_1431	GO:0003676	Interacting selectively and non-covalently with any nucleic acid.	MF	nucleic acid binding
tig00001_1431	GO:0006260	The cellular metabolic process in which a cell duplicates one or more molecules of DNA. DNA replication begins when specific sequences, known as origins of replication, are recognized and bound by initiation proteins, and ends when the original DNA molecule has been completely duplicated and the copies topologically separated. The unit of replication usually corresponds to the genome of the cell,…	BP	DNA replication
tig00001_1431	GO:0004386	Catalysis of the reaction: NTP + H2O = NDP + phosphate, to drive the unwinding of a DNA or RNA helix.	MF	helicase activity
tig00001_1431	GO:0003678	Catalysis of the reaction: NTP + H2O = NDP + phosphate, to drive the unwinding of a DNA helix.	MF	DNA helicase activity
tig00001_1431	GO:0000166	Interacting selectively and non-covalently with a nucleotide, any compound consisting of a nucleoside that is esterified with (ortho)phosphate or an oligophosphate at any hydroxyl group on the ribose or deoxyribose.	MF	nucleotide binding
tig00001_1432	GO:0003924	Catalysis of the reaction: GTP + H2O = GDP + phosphate.	MF	GTPase activity
tig00001_1432	GO:0005525	Interacting selectively and non-covalently with GTP, guanosine triphosphate.	MF	GTP binding
tig00001_1433	GO:0046855	The process of removing a phosphate group from any mono- or polyphosphorylated inositol.	BP	inositol phosphate dephosphorylation
tig00001_1435	GO:0045454	Any process that maintains the redox environment of a cell or compartment within a cell.	BP	cell redox homeostasis
tig00001_1435	GO:0016491	Catalysis of an oxidation-reduction (redox) reaction, a reversible chemical reaction in which the oxidation state of an atom or atoms within a molecule is altered. One substrate acts as a hydrogen or electron donor and becomes oxidized, while the other acts as hydrogen or electron acceptor and becomes reduced.	MF	oxidoreductase activity
tig00001_1435	GO:0016668	Catalysis of an oxidation-reduction (redox) reaction in which a sulfur-containing group acts as a hydrogen or electron donor and reduces NAD or NADP.	MF	oxidoreductase activity, acting on a sulfur group of donors, NAD(P) as acceptor
tig00001_1435	GO:0004148	Catalysis of the reaction: protein N6-(dihydrolipoyl)lysine + NAD+ = protein N6-(lipoyl)lysine + NADH + H+.	MF	dihydrolipoyl dehydrogenase activity
tig00001_1436	GO:0016746	Catalysis of the transfer of an acyl group from one compound (donor) to another (acceptor).	MF	transferase activity, transferring acyl groups
tig00001_1437	GO:0003824	Catalysis of a biochemical reaction at physiological temperatures. In biologically catalyzed reactions, the reactants are known as substrates, and the catalysts are naturally occurring macromolecular substances known as enzymes. Enzymes possess specific binding sites for substrates, and are usually composed wholly or largely of protein, but RNA that has catalytic activity (ribozyme) is often also…	MF	catalytic activity
tig00001_1438	GO:0016624	Catalysis of an oxidation-reduction (redox) reaction in which an aldehyde or ketone (oxo) group acts as a hydrogen or electron donor and reduces a disulfide.	MF	oxidoreductase activity, acting on the aldehyde or oxo group of donors, disulfide as acceptor
tig00001_1439	GO:0003700	A protein or a member of a complex that interacts selectively and non-covalently with a specific DNA sequence (sometimes referred to as a motif) within the regulatory region of a gene to modulate transcription. Regulatory regions include promoters (proximal and distal) and enhancers. Genes are transcriptional units, and include bacterial operons.	MF	DNA-binding transcription factor activity
tig00001_1439	GO:0003824	Catalysis of a biochemical reaction at physiological temperatures. In biologically catalyzed reactions, the reactants are known as substrates, and the catalysts are naturally occurring macromolecular substances known as enzymes. Enzymes possess specific binding sites for substrates, and are usually composed wholly or largely of protein, but RNA that has catalytic activity (ribozyme) is often also…	MF	catalytic activity
tig00001_1439	GO:0009058	The chemical reactions and pathways resulting in the formation of substances; typically the energy-requiring part of metabolism in which simpler substances are transformed into more complex ones.	BP	biosynthetic process
tig00001_143	GO:0005524	Interacting selectively and non-covalently with ATP, adenosine 5'-triphosphate, a universally important coenzyme and enzyme regulator.	MF	ATP binding
tig00001_143	GO:0006298	A system for the correction of errors in which an incorrect base, which cannot form hydrogen bonds with the corresponding base in the parent strand, is incorporated into the daughter strand. The mismatch repair system promotes genomic fidelity by repairing base-base mismatches, insertion-deletion loops and heterologies generated during DNA replication and recombination.	BP	mismatch repair
tig00001_1440	GO:0003920	Catalysis of the reaction: IMP + NADP(+) + NH(4)(+) = GMP + 2 H(+) + NADPH.	MF	GMP reductase activity
tig00001_1440	GO:0003824	Catalysis of a biochemical reaction at physiological temperatures. In biologically catalyzed reactions, the reactants are known as substrates, and the catalysts are naturally occurring macromolecular substances known as enzymes. Enzymes possess specific binding sites for substrates, and are usually composed wholly or largely of protein, but RNA that has catalytic activity (ribozyme) is often also…	MF	catalytic activity
tig00001_1440	GO:0016491	Catalysis of an oxidation-reduction (redox) reaction, a reversible chemical reaction in which the oxidation state of an atom or atoms within a molecule is altered. One substrate acts as a hydrogen or electron donor and becomes oxidized, while the other acts as hydrogen or electron acceptor and becomes reduced.	MF	oxidoreductase activity
tig00001_1441	GO:0016021	The component of a membrane consisting of the gene products and protein complexes having at least some part of their peptide sequence embedded in the hydrophobic region of the membrane.	CC	integral component of membrane
tig00001_1442	GO:0005524	Interacting selectively and non-covalently with ATP, adenosine 5'-triphosphate, a universally important coenzyme and enzyme regulator.	MF	ATP binding
tig00001_1444	GO:0005534	Interacting selectively and non-covalently with the aldohexose galactose (galacto-hexose), a common constituent of many oligo- and polysaccharides.	MF	galactose binding
tig00001_1445	GO:0000155	Catalysis of the phosphorylation of a histidine residue in response to detection of an extracellular signal such as a chemical ligand or change in environment, to initiate a change in cell state or activity. The two-component sensor is a histidine kinase that autophosphorylates a histidine residue in its active site. The phosphate is then transferred to an aspartate residue in a downstream respon…	MF	phosphorelay sensor kinase activity
tig00001_1445	GO:0007165	The cellular process in which a signal is conveyed to trigger a change in the activity or state of a cell. Signal transduction begins with reception of a signal (e.g. a ligand binding to a receptor or receptor activation by a stimulus such as light), or for signal transduction in the absence of ligand, signal-withdrawal or the activity of a constitutively active receptor. Signal transduction ends…	BP	signal transduction
tig00001_1446	GO:0000160	A conserved series of molecular signals found in prokaryotes and eukaryotes; involves autophosphorylation of a histidine kinase and the transfer of the phosphate group to an aspartate that then acts as a phospho-donor to response regulator proteins.	BP	phosphorelay signal transduction system
tig00001_1446	GO:0003700	A protein or a member of a complex that interacts selectively and non-covalently with a specific DNA sequence (sometimes referred to as a motif) within the regulatory region of a gene to modulate transcription. Regulatory regions include promoters (proximal and distal) and enhancers. Genes are transcriptional units, and include bacterial operons.	MF	DNA-binding transcription factor activity
tig00001_1447	GO:0016491	Catalysis of an oxidation-reduction (redox) reaction, a reversible chemical reaction in which the oxidation state of an atom or atoms within a molecule is altered. One substrate acts as a hydrogen or electron donor and becomes oxidized, while the other acts as hydrogen or electron acceptor and becomes reduced.	MF	oxidoreductase activity
tig00001_1448	GO:0004637	Catalysis of the reaction: 5-phospho-D-ribosylamine + ATP + glycine = N(1)-(5-phospho-D-ribosyl)glycinamide + ADP + 2 H(+) + phosphate.	MF	phosphoribosylamine-glycine ligase activity
tig00001_1448	GO:0005524	Interacting selectively and non-covalently with ATP, adenosine 5'-triphosphate, a universally important coenzyme and enzyme regulator.	MF	ATP binding
tig00001_1449	GO:0003937	Catalysis of the reaction: IMP + H2O = 5-formamido-1-(5-phosphoribosyl)imidazole-4-carboxamide.	MF	IMP cyclohydrolase activity
tig00001_1449	GO:0003824	Catalysis of a biochemical reaction at physiological temperatures. In biologically catalyzed reactions, the reactants are known as substrates, and the catalysts are naturally occurring macromolecular substances known as enzymes. Enzymes possess specific binding sites for substrates, and are usually composed wholly or largely of protein, but RNA that has catalytic activity (ribozyme) is often also…	MF	catalytic activity
tig00001_144	GO:0047429	Catalysis of the reaction: H2O + a nucleoside triphosphate = diphosphate + a nucleotide.	MF	nucleoside-triphosphate diphosphatase activity
tig00001_1450	GO:0009058	The chemical reactions and pathways resulting in the formation of substances; typically the energy-requiring part of metabolism in which simpler substances are transformed into more complex ones.	BP	biosynthetic process
tig00001_1450	GO:0004644	Catalysis of the reaction: 10-formyltetrahydrofolate + N1-(5-phospho-D-ribosyl)glycinamide = tetrahydrofolate + N2-formyl-N1-(5-phospho-D-ribosyl)glycinamide.	MF	phosphoribosylglycinamide formyltransferase activity
tig00001_1451	GO:0004641	Catalysis of the reaction: 2-(formamido)-N(1)-(5-phospho-D-ribosyl)acetamidine + ATP = 5-amino-1-(5-phospho-D-ribosyl)imidazole + ADP + 2 H(+) + phosphate.	MF	phosphoribosylformylglycinamidine cyclo-ligase activity
tig00001_1452	GO:0004044	Catalysis of the reaction: 5-phospho-beta-D-ribosylamine + L-glutamate + diphosphate = 5-phospho-alpha-D-ribose 1-diphosphate + L-glutamine + H(2)O.	MF	amidophosphoribosyltransferase activity
tig00001_1452	GO:0009116	The chemical reactions and pathways involving a nucleoside, a nucleobase linked to either beta-D-ribofuranose (a ribonucleoside) or 2-deoxy-beta-D-ribofuranose, (a deoxyribonucleoside), e.g. adenosine, guanosine, inosine, cytidine, uridine and deoxyadenosine, deoxyguanosine, deoxycytidine and thymidine (= deoxythymidine).	BP	nucleoside metabolic process
tig00001_1453	GO:0004642	Catalysis of the reaction: N(2)-formyl-N(1)-(5-phospho-D-ribosyl)glycinamide + L-glutamine + ATP + H(2)O = 2-(formamido)-N(1)-(5-phospho-D-ribosyl)acetamidine + L-glutamate + ADP + 2 H(+) + phosphate.	MF	phosphoribosylformylglycinamidine synthase activity
tig00001_1454	GO:0004642	Catalysis of the reaction: N(2)-formyl-N(1)-(5-phospho-D-ribosyl)glycinamide + L-glutamine + ATP + H(2)O = 2-(formamido)-N(1)-(5-phospho-D-ribosyl)acetamidine + L-glutamate + ADP + 2 H(+) + phosphate.	MF	phosphoribosylformylglycinamidine synthase activity
tig00001_1456	GO:0004639	Catalysis of the reaction: 5-amino-1-(5-phospho-D-ribosyl)imidazole-4-carboxylate + L-aspartate + ATP = (2S)-2-[5-amino-1-(5-phospho-beta-D-ribosyl)imidazole-4-carboxamido]succinate + ADP + 2 H(+) + phosphate.	MF	phosphoribosylaminoimidazolesuccinocarboxamide synthase activity
tig00001_1456	GO:0009236	The chemical reactions and pathways resulting in the formation of cobalamin (vitamin B12), a water-soluble vitamin characterized by possession of a corrin nucleus containing a cobalt atom.	BP	cobalamin biosynthetic process
tig00001_1458	GO:0003824	Catalysis of a biochemical reaction at physiological temperatures. In biologically catalyzed reactions, the reactants are known as substrates, and the catalysts are naturally occurring macromolecular substances known as enzymes. Enzymes possess specific binding sites for substrates, and are usually composed wholly or largely of protein, but RNA that has catalytic activity (ribozyme) is often also…	MF	catalytic activity
tig00001_1458	GO:0004018	Catalysis of the reaction: N6-(1,2-dicarboxyethyl)AMP = fumarate + AMP.	MF	N6-(1,2-dicarboxyethyl)AMP AMP-lyase (fumarate-forming) activity
tig00001_1459	GO:0004638	Catalysis of the reaction: 5-amino-1-(5-phospho-D-ribosyl)imidazole-4-carboxylate + 2 H(+) = 5-amino-1-(5-phospho-D-ribosyl)imidazole + CO(2).	MF	phosphoribosylaminoimidazole carboxylase activity
tig00001_1459	GO:0005524	Interacting selectively and non-covalently with ATP, adenosine 5'-triphosphate, a universally important coenzyme and enzyme regulator.	MF	ATP binding
tig00001_145	GO:0009401	The uptake and phosphorylation of specific carbohydrates from the extracellular environment; uptake and phosphorylation are coupled, making the PTS a link between the uptake and metabolism of sugars; phosphoenolpyruvate is the original phosphate donor; phosphoenolpyruvate passes the phosphate via a signal transduction pathway, to enzyme 1 (E1), which in turn passes it on to the histidine protein,…	BP	phosphoenolpyruvate-dependent sugar phosphotransferase system
tig00001_145	GO:0008982	Catalysis of the PEP-dependent, phosphoryl transfer-driven transport of substances across a membrane. The transport happens by catalysis of the reaction: protein N-phosphohistidine + sugar(out) = protein histidine + sugar phosphate(in). This differs from primary and secondary active transport in that the solute is modified during transport.	MF	protein-N(PI)-phosphohistidine-sugar phosphotransferase activity
tig00001_145	GO:0015574	Enables the transfer of trehalose from one side of a membrane to the other. Trehalose is the disaccharide alpha-D-glucopyranosyl-alpha-D-glucopyranoside that acts of a reserve carbohydrate in certain fungi, algae and lichens.	MF	trehalose transmembrane transporter activity
tig00001_1460	GO:0006189	The chemical reactions and pathways resulting in the formation of IMP, inosine monophosphate, by the stepwise assembly of a purine ring on ribose 5-phosphate.	BP	'de novo' IMP biosynthetic process
tig00001_1461	GO:0016020	A lipid bilayer along with all the proteins and protein complexes embedded in it an attached to it.	CC	membrane
tig00001_1461	GO:0015851	The directed movement of a nucleobase, any nitrogenous base that is a constituent of a nucleoside, nucleotide, or nucleic acid, into, out of or within a cell, or between cells, by means of some agent such as a transporter or pore.	BP	nucleobase transport
tig00001_1462	GO:0009116	The chemical reactions and pathways involving a nucleoside, a nucleobase linked to either beta-D-ribofuranose (a ribonucleoside) or 2-deoxy-beta-D-ribofuranose, (a deoxyribonucleoside), e.g. adenosine, guanosine, inosine, cytidine, uridine and deoxyadenosine, deoxyguanosine, deoxycytidine and thymidine (= deoxythymidine).	BP	nucleoside metabolic process
tig00001_1462	GO:0016763	Catalysis of the transfer of a pentosyl group from one compound (donor) to another (acceptor).	MF	transferase activity, transferring pentosyl groups
tig00001_1463	GO:0016491	Catalysis of an oxidation-reduction (redox) reaction, a reversible chemical reaction in which the oxidation state of an atom or atoms within a molecule is altered. One substrate acts as a hydrogen or electron donor and becomes oxidized, while the other acts as hydrogen or electron acceptor and becomes reduced.	MF	oxidoreductase activity
tig00001_1465	GO:0016020	A lipid bilayer along with all the proteins and protein complexes embedded in it an attached to it.	CC	membrane
tig00001_1466	GO:0016020	A lipid bilayer along with all the proteins and protein complexes embedded in it an attached to it.	CC	membrane
tig00001_1468	GO:0003824	Catalysis of a biochemical reaction at physiological temperatures. In biologically catalyzed reactions, the reactants are known as substrates, and the catalysts are naturally occurring macromolecular substances known as enzymes. Enzymes possess specific binding sites for substrates, and are usually composed wholly or largely of protein, but RNA that has catalytic activity (ribozyme) is often also…	MF	catalytic activity
tig00001_1469	GO:0004040	Catalysis of the reaction: a monocarboxylic acid amide + H2O = a monocarboxylate + NH3.	MF	amidase activity
tig00001_146	GO:0003700	A protein or a member of a complex that interacts selectively and non-covalently with a specific DNA sequence (sometimes referred to as a motif) within the regulatory region of a gene to modulate transcription. Regulatory regions include promoters (proximal and distal) and enhancers. Genes are transcriptional units, and include bacterial operons.	MF	DNA-binding transcription factor activity
tig00001_146	GO:0003677	Any molecular function by which a gene product interacts selectively and non-covalently with DNA (deoxyribonucleic acid).	MF	DNA binding
tig00001_1470	GO:0006508	The hydrolysis of proteins into smaller polypeptides and/or amino acids by cleavage of their peptide bonds.	BP	proteolysis
tig00001_1472	GO:0016491	Catalysis of an oxidation-reduction (redox) reaction, a reversible chemical reaction in which the oxidation state of an atom or atoms within a molecule is altered. One substrate acts as a hydrogen or electron donor and becomes oxidized, while the other acts as hydrogen or electron acceptor and becomes reduced.	MF	oxidoreductase activity
tig00001_1477	GO:0000155	Catalysis of the phosphorylation of a histidine residue in response to detection of an extracellular signal such as a chemical ligand or change in environment, to initiate a change in cell state or activity. The two-component sensor is a histidine kinase that autophosphorylates a histidine residue in its active site. The phosphate is then transferred to an aspartate residue in a downstream respon…	MF	phosphorelay sensor kinase activity
tig00001_1477	GO:0016310	The process of introducing a phosphate group into a molecule, usually with the formation of a phosphoric ester, a phosphoric anhydride or a phosphoric amide.	BP	phosphorylation
tig00001_1478	GO:0000160	A conserved series of molecular signals found in prokaryotes and eukaryotes; involves autophosphorylation of a histidine kinase and the transfer of the phosphate group to an aspartate that then acts as a phospho-donor to response regulator proteins.	BP	phosphorelay signal transduction system
tig00001_1479	GO:0051287	Interacting selectively and non-covalently with nicotinamide adenine dinucleotide, a coenzyme involved in many redox and biosynthetic reactions; binding may be to either the oxidized form, NAD+, or the reduced form, NADH.	MF	NAD binding
tig00001_1479	GO:0016616	Catalysis of an oxidation-reduction (redox) reaction in which a CH-OH group acts as a hydrogen or electron donor and reduces NAD+ or NADP.	MF	oxidoreductase activity, acting on the CH-OH group of donors, NAD or NADP as acceptor
tig00001_147	GO:0033743	Catalysis of the reaction: peptide-L-methionine + H(2)O + thioredoxin disulfide = peptide-L-methionine (R)-S-oxide + thioredoxin. Can act on oxidized methionine in peptide linkage with specificity for the R enantiomer. Thioredoxin disulfide is the oxidized form of thioredoxin.	MF	peptide-methionine (R)-S-oxide reductase activity
tig00001_147	GO:0006979	Any process that results in a change in state or activity of a cell or an organism (in terms of movement, secretion, enzyme production, gene expression, etc.) as a result of oxidative stress, a state often resulting from exposure to high levels of reactive oxygen species, e.g. superoxide anions, hydrogen peroxide (H2O2), and hydroxyl radicals.	BP	response to oxidative stress
tig00001_1480	GO:0016021	The component of a membrane consisting of the gene products and protein complexes having at least some part of their peptide sequence embedded in the hydrophobic region of the membrane.	CC	integral component of membrane
tig00001_1481	GO:0016810	Catalysis of the hydrolysis of any carbon-nitrogen bond, C-N, with the exception of peptide bonds.	MF	hydrolase activity, acting on carbon-nitrogen (but not peptide) bonds
tig00001_1481	GO:0006044	The chemical reactions and pathways involving N-acetylglucosamine. The D isomer is a common structural unit of glycoproteins in plants, bacteria and animals; it is often the terminal sugar of an oligosaccharide group of a glycoprotein.	BP	N-acetylglucosamine metabolic process
tig00001_1481	GO:0016787	Catalysis of the hydrolysis of various bonds, e.g. C-O, C-N, C-C, phosphoric anhydride bonds, etc. Hydrolase is the systematic name for any enzyme of EC class 3.	MF	hydrolase activity
tig00001_1482	GO:0005515	Interacting selectively and non-covalently with any protein or protein complex (a complex of two or more proteins that may include other nonprotein molecules).	MF	protein binding
tig00001_1482	GO:0003677	Any molecular function by which a gene product interacts selectively and non-covalently with DNA (deoxyribonucleic acid).	MF	DNA binding
tig00001_1483	GO:0003824	Catalysis of a biochemical reaction at physiological temperatures. In biologically catalyzed reactions, the reactants are known as substrates, and the catalysts are naturally occurring macromolecular substances known as enzymes. Enzymes possess specific binding sites for substrates, and are usually composed wholly or largely of protein, but RNA that has catalytic activity (ribozyme) is often also…	MF	catalytic activity
tig00001_1483	GO:0009058	The chemical reactions and pathways resulting in the formation of substances; typically the energy-requiring part of metabolism in which simpler substances are transformed into more complex ones.	BP	biosynthetic process
tig00001_148	GO:0005524	Interacting selectively and non-covalently with ATP, adenosine 5'-triphosphate, a universally important coenzyme and enzyme regulator.	MF	ATP binding
tig00001_148	GO:0003678	Catalysis of the reaction: NTP + H2O = NDP + phosphate, to drive the unwinding of a DNA helix.	MF	DNA helicase activity
tig00001_148	GO:0003677	Any molecular function by which a gene product interacts selectively and non-covalently with DNA (deoxyribonucleic acid).	MF	DNA binding
tig00001_1490	GO:0016788	Catalysis of the hydrolysis of any ester bond.	MF	hydrolase activity, acting on ester bonds
tig00001_1491	GO:0005524	Interacting selectively and non-covalently with ATP, adenosine 5'-triphosphate, a universally important coenzyme and enzyme regulator.	MF	ATP binding
tig00001_1492	GO:0009228	The chemical reactions and pathways resulting in the formation of thiamine (vitamin B1), a water soluble vitamin present in fresh vegetables and meats, especially liver.	BP	thiamine biosynthetic process
tig00001_1493	GO:0016020	A lipid bilayer along with all the proteins and protein complexes embedded in it an attached to it.	CC	membrane
tig00001_1494	GO:0016491	Catalysis of an oxidation-reduction (redox) reaction, a reversible chemical reaction in which the oxidation state of an atom or atoms within a molecule is altered. One substrate acts as a hydrogen or electron donor and becomes oxidized, while the other acts as hydrogen or electron acceptor and becomes reduced.	MF	oxidoreductase activity
tig00001_1494	GO:0045454	Any process that maintains the redox environment of a cell or compartment within a cell.	BP	cell redox homeostasis
tig00001_1495	GO:0005524	Interacting selectively and non-covalently with ATP, adenosine 5'-triphosphate, a universally important coenzyme and enzyme regulator.	MF	ATP binding
tig00001_1496	GO:0016020	A lipid bilayer along with all the proteins and protein complexes embedded in it an attached to it.	CC	membrane
tig00001_1496	GO:0022857	Enables the transfer of a substance, usually a specific substance or a group of related substances, from one side of a membrane to the other.	MF	transmembrane transporter activity
tig00001_149	GO:0003677	Any molecular function by which a gene product interacts selectively and non-covalently with DNA (deoxyribonucleic acid).	MF	DNA binding
tig00001_149	GO:0006281	The process of restoring DNA after damage. Genomes are subject to damage by chemical and physical agents in the environment (e.g. UV and ionizing radiations, chemical mutagens, fungal and bacterial toxins, etc.) and by free radicals or alkylating agents endogenously generated in metabolism. DNA is also damaged because of errors during its replication. A variety of different DNA repair pathways ha…	BP	DNA repair
tig00001_14	GO:0004019	Catalysis of the reaction: L-aspartate + GTP + IMP = N(6)-(1,2-dicarboxyethyl)-AMP + GDP + 3 H(+) + phosphate.	MF	adenylosuccinate synthase activity
tig00001_14	GO:0005525	Interacting selectively and non-covalently with GTP, guanosine triphosphate.	MF	GTP binding
tig00001_1500	GO:0003677	Any molecular function by which a gene product interacts selectively and non-covalently with DNA (deoxyribonucleic acid).	MF	DNA binding
tig00001_1507	GO:0003824	Catalysis of a biochemical reaction at physiological temperatures. In biologically catalyzed reactions, the reactants are known as substrates, and the catalysts are naturally occurring macromolecular substances known as enzymes. Enzymes possess specific binding sites for substrates, and are usually composed wholly or largely of protein, but RNA that has catalytic activity (ribozyme) is often also…	MF	catalytic activity
tig00001_1507	GO:0016491	Catalysis of an oxidation-reduction (redox) reaction, a reversible chemical reaction in which the oxidation state of an atom or atoms within a molecule is altered. One substrate acts as a hydrogen or electron donor and becomes oxidized, while the other acts as hydrogen or electron acceptor and becomes reduced.	MF	oxidoreductase activity
tig00001_1507	GO:0043365	Catalysis of the reaction: S-adenosyl-L-methionine + dihydroflavodoxin + [formate C-acetyltransferase]-glycine = 5'-deoxyadenosine + L-methionine + flavodoxin semiquinone + [formate C-acetyltransferase]-glycin-2-yl radical.	MF	[formate-C-acetyltransferase]-activating enzyme activity
tig00001_1508	GO:0005737	All of the contents of a cell excluding the plasma membrane and nucleus, but including other subcellular structures.	CC	cytoplasm
tig00001_1508	GO:0003824	Catalysis of a biochemical reaction at physiological temperatures. In biologically catalyzed reactions, the reactants are known as substrates, and the catalysts are naturally occurring macromolecular substances known as enzymes. Enzymes possess specific binding sites for substrates, and are usually composed wholly or largely of protein, but RNA that has catalytic activity (ribozyme) is often also…	MF	catalytic activity
tig00001_1509	GO:0003677	Any molecular function by which a gene product interacts selectively and non-covalently with DNA (deoxyribonucleic acid).	MF	DNA binding
tig00001_1509	GO:0003918	Catalysis of a DNA topological transformation by transiently cleaving a pair of complementary DNA strands to form a gate through which a second double-stranded DNA segment is passed, after which the severed strands in the first DNA segment are rejoined; product release is coupled to ATP binding and hydrolysis; changes the linking number in multiples of 2.	MF	DNA topoisomerase type II (ATP-hydrolyzing) activity
tig00001_150	GO:0003677	Any molecular function by which a gene product interacts selectively and non-covalently with DNA (deoxyribonucleic acid).	MF	DNA binding
tig00001_1510	GO:0003677	Any molecular function by which a gene product interacts selectively and non-covalently with DNA (deoxyribonucleic acid).	MF	DNA binding
tig00001_1510	GO:0003918	Catalysis of a DNA topological transformation by transiently cleaving a pair of complementary DNA strands to form a gate through which a second double-stranded DNA segment is passed, after which the severed strands in the first DNA segment are rejoined; product release is coupled to ATP binding and hydrolysis; changes the linking number in multiples of 2.	MF	DNA topoisomerase type II (ATP-hydrolyzing) activity
tig00001_1512	GO:0005886	The membrane surrounding a cell that separates the cell from its external environment. It consists of a phospholipid bilayer and associated proteins.	CC	plasma membrane
tig00001_1513	GO:0005975	The chemical reactions and pathways involving carbohydrates, any of a group of organic compounds based of the general formula Cx(H2O)y. Includes the formation of carbohydrate derivatives by the addition of a carbohydrate residue to another molecule.	BP	carbohydrate metabolic process
tig00001_1513	GO:0030246	Interacting selectively and non-covalently with any carbohydrate, which includes monosaccharides, oligosaccharides and polysaccharides as well as substances derived from monosaccharides by reduction of the carbonyl group (alditols), by oxidation of one or more hydroxy groups to afford the corresponding aldehydes, ketones, or carboxylic acids, or by replacement of one or more hydroxy group(s) by a…	MF	carbohydrate binding
tig00001_1513	GO:0003824	Catalysis of a biochemical reaction at physiological temperatures. In biologically catalyzed reactions, the reactants are known as substrates, and the catalysts are naturally occurring macromolecular substances known as enzymes. Enzymes possess specific binding sites for substrates, and are usually composed wholly or largely of protein, but RNA that has catalytic activity (ribozyme) is often also…	MF	catalytic activity
tig00001_1514	GO:0003677	Any molecular function by which a gene product interacts selectively and non-covalently with DNA (deoxyribonucleic acid).	MF	DNA binding
tig00001_1515	GO:0005524	Interacting selectively and non-covalently with ATP, adenosine 5'-triphosphate, a universally important coenzyme and enzyme regulator.	MF	ATP binding
tig00001_1516	GO:0004298	Catalysis of the hydrolysis of internal peptide bonds in a polypeptide chain by a mechanism in which the hydroxyl group of a threonine residue at the active center acts as a nucleophile.	MF	threonine-type endopeptidase activity
tig00001_1516	GO:0005839	A multisubunit barrel shaped endoprotease complex, which is the core of the proteasome complex.	CC	proteasome core complex
tig00001_1517	GO:0003677	Any molecular function by which a gene product interacts selectively and non-covalently with DNA (deoxyribonucleic acid).	MF	DNA binding
tig00001_1518	GO:0005737	All of the contents of a cell excluding the plasma membrane and nucleus, but including other subcellular structures.	CC	cytoplasm
tig00001_1518	GO:0008033	The process in which a pre-tRNA molecule is converted to a mature tRNA, ready for addition of an aminoacyl group.	BP	tRNA processing
tig00001_1519	GO:0003677	Any molecular function by which a gene product interacts selectively and non-covalently with DNA (deoxyribonucleic acid).	MF	DNA binding
tig00001_1519	GO:0003917	Catalysis of a DNA topological transformation by transiently cleaving one DNA strand at a time to allow passage of another strand; changes the linking number by +1 per catalytic cycle.	MF	DNA topoisomerase type I activity
tig00001_151	GO:0004725	Catalysis of the reaction: protein tyrosine phosphate + H2O = protein tyrosine + phosphate.	MF	protein tyrosine phosphatase activity
tig00001_1520	GO:0009294	The introduction and uptake of foreign genetic material (DNA or RNA) into a cell, and often the expression of that genetic material.	BP	DNA mediated transformation
tig00001_1521	GO:0003676	Interacting selectively and non-covalently with any nucleic acid.	MF	nucleic acid binding
tig00001_1521	GO:0004523	Catalysis of the endonucleolytic cleavage of RNA in RNA-DNA hybrids to 5'-phosphomonoesters.	MF	RNA-DNA hybrid ribonuclease activity
tig00001_1521	GO:0003723	Interacting selectively and non-covalently with an RNA molecule or a portion thereof.	MF	RNA binding
tig00001_1522	GO:0005525	Interacting selectively and non-covalently with GTP, guanosine triphosphate.	MF	GTP binding
tig00001_1524	GO:0022857	Enables the transfer of a substance, usually a specific substance or a group of related substances, from one side of a membrane to the other.	MF	transmembrane transporter activity
tig00001_1525	GO:0008236	Catalysis of the hydrolysis of peptide bonds in a polypeptide chain by a catalytic mechanism that involves a catalytic triad consisting of a serine nucleophile that is activated by a proton relay involving an acidic residue (e.g. aspartate or glutamate) and a basic residue (usually histidine).	MF	serine-type peptidase activity
tig00001_1525	GO:0006508	The hydrolysis of proteins into smaller polypeptides and/or amino acids by cleavage of their peptide bonds.	BP	proteolysis
tig00001_1525	GO:0004252	Catalysis of the hydrolysis of internal, alpha-peptide bonds in a polypeptide chain by a catalytic mechanism that involves a catalytic triad consisting of a serine nucleophile that is activated by a proton relay involving an acidic residue (e.g. aspartate or glutamate) and a basic residue (usually histidine).	MF	serine-type endopeptidase activity
tig00001_1527	GO:0008113	Catalysis of the reactions: peptide-L-methionine + thioredoxin disulfide + H2O = peptide-L-methionine (S)-S-oxide + thioredoxin, and L-methionine + thioredoxin disulfide + H2O = L-methionine (S)-S-oxide + thioredoxin. Can act on oxidized methionine in peptide linkage with specificity for the S enantiomer. Thioredoxin disulfide is the oxidized form of thioredoxin.	MF	peptide-methionine (S)-S-oxide reductase activity
tig00001_1531	GO:0016021	The component of a membrane consisting of the gene products and protein complexes having at least some part of their peptide sequence embedded in the hydrophobic region of the membrane.	CC	integral component of membrane
tig00001_1532	GO:0004146	Catalysis of the reaction: 5,6,7,8-tetrahydrofolate + NADP+ = 7,8-dihydrofolate + NADPH + H+.	MF	dihydrofolate reductase activity
tig00001_1533	GO:0004799	Catalysis of the reaction: 5,10-methylenetetrahydrofolate + dUMP = 7,8-dihydrofolate + thymidylate.	MF	thymidylate synthase activity
tig00001_1534	GO:0005524	Interacting selectively and non-covalently with ATP, adenosine 5'-triphosphate, a universally important coenzyme and enzyme regulator.	MF	ATP binding
tig00001_1534	GO:0003677	Any molecular function by which a gene product interacts selectively and non-covalently with DNA (deoxyribonucleic acid).	MF	DNA binding
tig00001_1535	GO:0006812	The directed movement of cations, atoms or small molecules with a net positive charge, into, out of or within a cell, or between cells, by means of some agent such as a transporter or pore.	BP	cation transport
tig00001_1538	GO:0003723	Interacting selectively and non-covalently with an RNA molecule or a portion thereof.	MF	RNA binding
tig00001_1538	GO:0001680	Post-transcriptional addition of the terminal 3' CCA sequence to a tRNA which does not encode this sequence within the primary transcript. CCA addition proceeds by the sequential addition of CTP, CTP, and then ATP to the 3' end of the tRNA, yielding a diphosphate with each nucleotide addition.	BP	tRNA 3'-terminal CCA addition
tig00001_153	GO:0015658	Enables the transfer of branched-chain amino acids from one side of a membrane to the other. Branched-chain amino acids are amino acids with a branched carbon skeleton without rings.	MF	branched-chain amino acid transmembrane transporter activity
tig00001_1541	GO:0005515	Interacting selectively and non-covalently with any protein or protein complex (a complex of two or more proteins that may include other nonprotein molecules).	MF	protein binding
tig00001_1542	GO:0005515	Interacting selectively and non-covalently with any protein or protein complex (a complex of two or more proteins that may include other nonprotein molecules).	MF	protein binding
tig00001_1544	GO:0003677	Any molecular function by which a gene product interacts selectively and non-covalently with DNA (deoxyribonucleic acid).	MF	DNA binding
tig00001_1545	GO:0005525	Interacting selectively and non-covalently with GTP, guanosine triphosphate.	MF	GTP binding
tig00001_1546	GO:0003676	Interacting selectively and non-covalently with any nucleic acid.	MF	nucleic acid binding
tig00001_1547	GO:0004127	Catalysis of the reaction: ATP + (d)CMP = ADP + (d)CDP.	MF	cytidylate kinase activity
tig00001_1549	GO:0004386	Catalysis of the reaction: NTP + H2O = NDP + phosphate, to drive the unwinding of a DNA or RNA helix.	MF	helicase activity
tig00001_1549	GO:0003676	Interacting selectively and non-covalently with any nucleic acid.	MF	nucleic acid binding
tig00001_154	GO:0005267	Enables the facilitated diffusion of a potassium ion (by an energy-independent process) involving passage through a transmembrane aqueous pore or channel without evidence for a carrier-mediated mechanism.	MF	potassium channel activity
tig00001_1551	GO:0005506	Interacting selectively and non-covalently with iron (Fe) ions.	MF	iron ion binding
tig00001_1552	GO:0016787	Catalysis of the hydrolysis of various bonds, e.g. C-O, C-N, C-C, phosphoric anhydride bonds, etc. Hydrolase is the systematic name for any enzyme of EC class 3.	MF	hydrolase activity
tig00001_1553	GO:0016787	Catalysis of the hydrolysis of various bonds, e.g. C-O, C-N, C-C, phosphoric anhydride bonds, etc. Hydrolase is the systematic name for any enzyme of EC class 3.	MF	hydrolase activity
tig00001_1553	GO:0008270	Interacting selectively and non-covalently with zinc (Zn) ions.	MF	zinc ion binding
tig00001_1554	GO:0016021	The component of a membrane consisting of the gene products and protein complexes having at least some part of their peptide sequence embedded in the hydrophobic region of the membrane.	CC	integral component of membrane
tig00001_1555	GO:0005886	The membrane surrounding a cell that separates the cell from its external environment. It consists of a phospholipid bilayer and associated proteins.	CC	plasma membrane
tig00001_1555	GO:0022857	Enables the transfer of a substance, usually a specific substance or a group of related substances, from one side of a membrane to the other.	MF	transmembrane transporter activity
tig00001_1556	GO:0003723	Interacting selectively and non-covalently with an RNA molecule or a portion thereof.	MF	RNA binding
tig00001_1556	GO:0001522	The intramolecular conversion of uridine to pseudouridine within an RNA molecule. This posttranscriptional base modification occurs in tRNA, rRNA, and snRNAs.	BP	pseudouridine synthesis
tig00001_1557	GO:0051304	The cell cycle process in which paired chromosomes are detached from each other. Chromosome separation begins with the release of cohesin complexes from chromosomes; in budding yeast, this includes the cleavage of cohesin complexes along the chromosome arms, followed by the separation of the centromeric regions. Chromosome separation also includes formation of chromatid axes mediated by condensin…	BP	chromosome separation
tig00001_155	GO:0016020	A lipid bilayer along with all the proteins and protein complexes embedded in it an attached to it.	CC	membrane
tig00001_1560	GO:0003677	Any molecular function by which a gene product interacts selectively and non-covalently with DNA (deoxyribonucleic acid).	MF	DNA binding
tig00001_1560	GO:0006310	Any process in which a new genotype is formed by reassortment of genes resulting in gene combinations different from those that were present in the parents. In eukaryotes genetic recombination can occur by chromosome assortment, intrachromosomal recombination, or nonreciprocal interchromosomal recombination. Interchromosomal recombination occurs by crossing over. In bacteria it may occur by genet…	BP	DNA recombination
tig00001_1562	GO:0003700	A protein or a member of a complex that interacts selectively and non-covalently with a specific DNA sequence (sometimes referred to as a motif) within the regulatory region of a gene to modulate transcription. Regulatory regions include promoters (proximal and distal) and enhancers. Genes are transcriptional units, and include bacterial operons.	MF	DNA-binding transcription factor activity
tig00001_1565	GO:0006352	Any process involved in the assembly of the RNA polymerase preinitiation complex (PIC) at the core promoter region of a DNA template, resulting in the subsequent synthesis of RNA from that promoter. The initiation phase includes PIC assembly and the formation of the first few bonds in the RNA chain, including abortive initiation, which occurs when the first few nucleotides are repeatedly synthesi…	BP	DNA-templated transcription, initiation
tig00001_1565	GO:0003700	A protein or a member of a complex that interacts selectively and non-covalently with a specific DNA sequence (sometimes referred to as a motif) within the regulatory region of a gene to modulate transcription. Regulatory regions include promoters (proximal and distal) and enhancers. Genes are transcriptional units, and include bacterial operons.	MF	DNA-binding transcription factor activity
tig00001_1565	GO:0003677	Any molecular function by which a gene product interacts selectively and non-covalently with DNA (deoxyribonucleic acid).	MF	DNA binding
tig00001_1566	GO:0003896	Catalysis of the synthesis of a short RNA primer on a DNA template, providing a free 3'-OH that can be extended by DNA-directed DNA polymerases.	MF	DNA primase activity
tig00001_1566	GO:0003677	Any molecular function by which a gene product interacts selectively and non-covalently with DNA (deoxyribonucleic acid).	MF	DNA binding
tig00001_1566	GO:0016779	Catalysis of the transfer of a nucleotidyl group to a reactant.	MF	nucleotidyltransferase activity
tig00001_1567	GO:0016021	The component of a membrane consisting of the gene products and protein complexes having at least some part of their peptide sequence embedded in the hydrophobic region of the membrane.	CC	integral component of membrane
tig00001_1567	GO:0000166	Interacting selectively and non-covalently with a nucleotide, any compound consisting of a nucleoside that is esterified with (ortho)phosphate or an oligophosphate at any hydroxyl group on the ribose or deoxyribose.	MF	nucleotide binding
tig00001_156	GO:0005524	Interacting selectively and non-covalently with ATP, adenosine 5'-triphosphate, a universally important coenzyme and enzyme regulator.	MF	ATP binding
tig00001_156	GO:0003333	The process in which an amino acid is transported across a membrane.	BP	amino acid transmembrane transport
tig00001_1572	GO:0003924	Catalysis of the reaction: GTP + H2O = GDP + phosphate.	MF	GTPase activity
tig00001_1572	GO:0005525	Interacting selectively and non-covalently with GTP, guanosine triphosphate.	MF	GTP binding
tig00001_1572	GO:0003746	Functions in chain elongation during polypeptide synthesis at the ribosome.	MF	translation elongation factor activity
tig00001_1574	GO:0009295	The region of a virus, bacterial cell, mitochondrion or chloroplast to which the nucleic acid is confined.	CC	nucleoid
tig00001_1575	GO:0016491	Catalysis of an oxidation-reduction (redox) reaction, a reversible chemical reaction in which the oxidation state of an atom or atoms within a molecule is altered. One substrate acts as a hydrogen or electron donor and becomes oxidized, while the other acts as hydrogen or electron acceptor and becomes reduced.	MF	oxidoreductase activity
tig00001_1578	GO:0015936	The chemical reactions and pathways involving coenzyme A, 3'-phosphoadenosine-(5')diphospho(4')pantatheine, an acyl carrier in many acylation and acyl-transfer reactions in which the intermediate is a thiol ester.	BP	coenzyme A metabolic process
tig00001_1578	GO:0016747	Catalysis of the transfer of an acyl group, other than amino-acyl, from one compound (donor) to another (acceptor).	MF	transferase activity, transferring acyl groups other than amino-acyl groups
tig00001_1578	GO:0016746	Catalysis of the transfer of an acyl group from one compound (donor) to another (acceptor).	MF	transferase activity, transferring acyl groups
tig00001_1578	GO:0004420	Catalysis of the reaction: (R)-mevalonate + CoA + 2 NADP(+) = (S)-3-hydroxy-3-methylglutaryl-CoA + 2 H(+) + 2 NADPH.	MF	hydroxymethylglutaryl-CoA reductase (NADPH) activity
tig00001_1579	GO:0016746	Catalysis of the transfer of an acyl group from one compound (donor) to another (acceptor).	MF	transferase activity, transferring acyl groups
tig00001_1579	GO:0004421	Catalysis of the reaction: acetoacetyl-CoA + acetyl-CoA + H(2)O = (S)-3-hydroxy-3-methylglutaryl-CoA + CoA + H(+).	MF	hydroxymethylglutaryl-CoA synthase activity
tig00001_157	GO:0016020	A lipid bilayer along with all the proteins and protein complexes embedded in it an attached to it.	CC	membrane
tig00001_157	GO:0016021	The component of a membrane consisting of the gene products and protein complexes having at least some part of their peptide sequence embedded in the hydrophobic region of the membrane.	CC	integral component of membrane
tig00001_1581	GO:0016021	The component of a membrane consisting of the gene products and protein complexes having at least some part of their peptide sequence embedded in the hydrophobic region of the membrane.	CC	integral component of membrane
tig00001_1581	GO:0000166	Interacting selectively and non-covalently with a nucleotide, any compound consisting of a nucleoside that is esterified with (ortho)phosphate or an oligophosphate at any hydroxyl group on the ribose or deoxyribose.	MF	nucleotide binding
tig00001_1582	GO:0008808	Catalysis of the reaction: phosphatidylglycerol + phosphatidylglycerol = diphosphatidylglycerol (cardiolipin) + glycerol.	MF	cardiolipin synthase activity
tig00001_1582	GO:0003824	Catalysis of a biochemical reaction at physiological temperatures. In biologically catalyzed reactions, the reactants are known as substrates, and the catalysts are naturally occurring macromolecular substances known as enzymes. Enzymes possess specific binding sites for substrates, and are usually composed wholly or largely of protein, but RNA that has catalytic activity (ribozyme) is often also…	MF	catalytic activity
tig00001_1583	GO:0008972	Catalysis of the reaction: ATP + 4-amino-2-methyl-5-phosphomethylpyrimidine = ADP + 4-amino-2-methyl-5-diphosphomethylpyrimidine.	MF	phosphomethylpyrimidine kinase activity
tig00001_1589	GO:0004553	Catalysis of the hydrolysis of any O-glycosyl bond.	MF	hydrolase activity, hydrolyzing O-glycosyl compounds
tig00001_1590	GO:0008982	Catalysis of the PEP-dependent, phosphoryl transfer-driven transport of substances across a membrane. The transport happens by catalysis of the reaction: protein N-phosphohistidine + sugar(out) = protein histidine + sugar phosphate(in). This differs from primary and secondary active transport in that the solute is modified during transport.	MF	protein-N(PI)-phosphohistidine-sugar phosphotransferase activity
tig00001_1591	GO:0003677	Any molecular function by which a gene product interacts selectively and non-covalently with DNA (deoxyribonucleic acid).	MF	DNA binding
tig00001_1591	GO:0003700	A protein or a member of a complex that interacts selectively and non-covalently with a specific DNA sequence (sometimes referred to as a motif) within the regulatory region of a gene to modulate transcription. Regulatory regions include promoters (proximal and distal) and enhancers. Genes are transcriptional units, and include bacterial operons.	MF	DNA-binding transcription factor activity
tig00001_1593	GO:0016787	Catalysis of the hydrolysis of various bonds, e.g. C-O, C-N, C-C, phosphoric anhydride bonds, etc. Hydrolase is the systematic name for any enzyme of EC class 3.	MF	hydrolase activity
tig00001_1596	GO:0015577	Enables the transfer of a galactitol from one side of a membrane to the other. Galactitol is the hexitol derived by the reduction of the aldehyde group of either D- or L-galactose.	MF	galactitol transmembrane transporter activity
tig00001_1596	GO:0009401	The uptake and phosphorylation of specific carbohydrates from the extracellular environment; uptake and phosphorylation are coupled, making the PTS a link between the uptake and metabolism of sugars; phosphoenolpyruvate is the original phosphate donor; phosphoenolpyruvate passes the phosphate via a signal transduction pathway, to enzyme 1 (E1), which in turn passes it on to the histidine protein,…	BP	phosphoenolpyruvate-dependent sugar phosphotransferase system
tig00001_1597	GO:0008982	Catalysis of the PEP-dependent, phosphoryl transfer-driven transport of substances across a membrane. The transport happens by catalysis of the reaction: protein N-phosphohistidine + sugar(out) = protein histidine + sugar phosphate(in). This differs from primary and secondary active transport in that the solute is modified during transport.	MF	protein-N(PI)-phosphohistidine-sugar phosphotransferase activity
tig00001_1599	GO:0003700	A protein or a member of a complex that interacts selectively and non-covalently with a specific DNA sequence (sometimes referred to as a motif) within the regulatory region of a gene to modulate transcription. Regulatory regions include promoters (proximal and distal) and enhancers. Genes are transcriptional units, and include bacterial operons.	MF	DNA-binding transcription factor activity
tig00001_1600	GO:0005975	The chemical reactions and pathways involving carbohydrates, any of a group of organic compounds based of the general formula Cx(H2O)y. Includes the formation of carbohydrate derivatives by the addition of a carbohydrate residue to another molecule.	BP	carbohydrate metabolic process
tig00001_1600	GO:0016773	Catalysis of the transfer of a phosphorus-containing group from one compound (donor) to an alcohol group (acceptor).	MF	phosphotransferase activity, alcohol group as acceptor
tig00001_1601	GO:0004471	Catalysis of the reaction: (S)-malate + NAD+ = pyruvate + CO2 + NADH + H+.	MF	malate dehydrogenase (decarboxylating) (NAD+) activity
tig00001_1602	GO:0030246	Interacting selectively and non-covalently with any carbohydrate, which includes monosaccharides, oligosaccharides and polysaccharides as well as substances derived from monosaccharides by reduction of the carbonyl group (alditols), by oxidation of one or more hydroxy groups to afford the corresponding aldehydes, ketones, or carboxylic acids, or by replacement of one or more hydroxy group(s) by a…	MF	carbohydrate binding
tig00001_1603	GO:0004553	Catalysis of the hydrolysis of any O-glycosyl bond.	MF	hydrolase activity, hydrolyzing O-glycosyl compounds
tig00001_1604	GO:0008982	Catalysis of the PEP-dependent, phosphoryl transfer-driven transport of substances across a membrane. The transport happens by catalysis of the reaction: protein N-phosphohistidine + sugar(out) = protein histidine + sugar phosphate(in). This differs from primary and secondary active transport in that the solute is modified during transport.	MF	protein-N(PI)-phosphohistidine-sugar phosphotransferase activity
tig00001_1604	GO:0009401	The uptake and phosphorylation of specific carbohydrates from the extracellular environment; uptake and phosphorylation are coupled, making the PTS a link between the uptake and metabolism of sugars; phosphoenolpyruvate is the original phosphate donor; phosphoenolpyruvate passes the phosphate via a signal transduction pathway, to enzyme 1 (E1), which in turn passes it on to the histidine protein,…	BP	phosphoenolpyruvate-dependent sugar phosphotransferase system
tig00001_1605	GO:0006355	Any process that modulates the frequency, rate or extent of cellular DNA-templated transcription.	BP	regulation of transcription, DNA-templated
tig00001_1605	GO:0003723	Interacting selectively and non-covalently with an RNA molecule or a portion thereof.	MF	RNA binding
tig00001_1606	GO:0016491	Catalysis of an oxidation-reduction (redox) reaction, a reversible chemical reaction in which the oxidation state of an atom or atoms within a molecule is altered. One substrate acts as a hydrogen or electron donor and becomes oxidized, while the other acts as hydrogen or electron acceptor and becomes reduced.	MF	oxidoreductase activity
tig00001_160	GO:0070403	Interacting selectively and non-covalently with the oxidized form, NAD, of nicotinamide adenine dinucleotide, a coenzyme involved in many redox and biosynthetic reactions.	MF	NAD+ binding
tig00001_1610	GO:0005524	Interacting selectively and non-covalently with ATP, adenosine 5'-triphosphate, a universally important coenzyme and enzyme regulator.	MF	ATP binding
tig00001_1612	GO:0008887	Catalysis of the reaction: D-glycerate + ATP = 3-phospho-D-glycerate + ADP + 2 H(+).	MF	glycerate kinase activity
tig00001_1613	GO:0015128	Enables the transfer of gluconate from one side of a membrane to the other. Gluconate is the aldonic acid derived from glucose.	MF	gluconate transmembrane transporter activity
tig00001_1614	GO:0003676	Interacting selectively and non-covalently with any nucleic acid.	MF	nucleic acid binding
tig00001_1614	GO:0015074	The process in which a segment of DNA is incorporated into another, usually larger, DNA molecule such as a chromosome.	BP	DNA integration
tig00001_1615	GO:0016020	A lipid bilayer along with all the proteins and protein complexes embedded in it an attached to it.	CC	membrane
tig00001_1618	GO:0008080	Catalysis of the transfer of an acetyl group to a nitrogen atom on the acceptor molecule.	MF	N-acetyltransferase activity
tig00001_1618	GO:0004343	Catalysis of the reaction: D-glucosamine 6-phosphate + acetyl-CoA = N-acetyl-D-glucosamine 6-phosphate + CoA + H(+).	MF	glucosamine 6-phosphate N-acetyltransferase activity
tig00001_161	GO:0046417	The chemical reactions and pathways involving chorismate, the anion of (3R-trans)-3-((1-carboxyethenyl)oxy)-4-hydroxy-1,5-cyclohexadiene-1-carboxylic acid.	BP	chorismate metabolic process
tig00001_161	GO:0016407	Catalysis of the transfer of an acetyl group to an acceptor molecule.	MF	acetyltransferase activity
tig00001_1620	GO:0005975	The chemical reactions and pathways involving carbohydrates, any of a group of organic compounds based of the general formula Cx(H2O)y. Includes the formation of carbohydrate derivatives by the addition of a carbohydrate residue to another molecule.	BP	carbohydrate metabolic process
tig00001_1621	GO:0003824	Catalysis of a biochemical reaction at physiological temperatures. In biologically catalyzed reactions, the reactants are known as substrates, and the catalysts are naturally occurring macromolecular substances known as enzymes. Enzymes possess specific binding sites for substrates, and are usually composed wholly or largely of protein, but RNA that has catalytic activity (ribozyme) is often also…	MF	catalytic activity
tig00001_1621	GO:0004590	Catalysis of the reaction: H(+) + orotidine 5'-phosphate = CO(2) + UMP.	MF	orotidine-5'-phosphate decarboxylase activity
tig00001_1622	GO:0008982	Catalysis of the PEP-dependent, phosphoryl transfer-driven transport of substances across a membrane. The transport happens by catalysis of the reaction: protein N-phosphohistidine + sugar(out) = protein histidine + sugar phosphate(in). This differs from primary and secondary active transport in that the solute is modified during transport.	MF	protein-N(PI)-phosphohistidine-sugar phosphotransferase activity
tig00001_1623	GO:0009401	The uptake and phosphorylation of specific carbohydrates from the extracellular environment; uptake and phosphorylation are coupled, making the PTS a link between the uptake and metabolism of sugars; phosphoenolpyruvate is the original phosphate donor; phosphoenolpyruvate passes the phosphate via a signal transduction pathway, to enzyme 1 (E1), which in turn passes it on to the histidine protein,…	BP	phosphoenolpyruvate-dependent sugar phosphotransferase system
tig00001_1626	GO:0003700	A protein or a member of a complex that interacts selectively and non-covalently with a specific DNA sequence (sometimes referred to as a motif) within the regulatory region of a gene to modulate transcription. Regulatory regions include promoters (proximal and distal) and enhancers. Genes are transcriptional units, and include bacterial operons.	MF	DNA-binding transcription factor activity
tig00001_1627	GO:0005515	Interacting selectively and non-covalently with any protein or protein complex (a complex of two or more proteins that may include other nonprotein molecules).	MF	protein binding
tig00001_1627	GO:0003677	Any molecular function by which a gene product interacts selectively and non-covalently with DNA (deoxyribonucleic acid).	MF	DNA binding
tig00001_162	GO:0036094	Interacting selectively and non-covalently with a small molecule, any low molecular weight, monomeric, non-encoded molecule.	MF	small molecule binding
tig00001_1630	GO:0008982	Catalysis of the PEP-dependent, phosphoryl transfer-driven transport of substances across a membrane. The transport happens by catalysis of the reaction: protein N-phosphohistidine + sugar(out) = protein histidine + sugar phosphate(in). This differs from primary and secondary active transport in that the solute is modified during transport.	MF	protein-N(PI)-phosphohistidine-sugar phosphotransferase activity
tig00001_1631	GO:0009401	The uptake and phosphorylation of specific carbohydrates from the extracellular environment; uptake and phosphorylation are coupled, making the PTS a link between the uptake and metabolism of sugars; phosphoenolpyruvate is the original phosphate donor; phosphoenolpyruvate passes the phosphate via a signal transduction pathway, to enzyme 1 (E1), which in turn passes it on to the histidine protein,…	BP	phosphoenolpyruvate-dependent sugar phosphotransferase system
tig00001_1632	GO:0004553	Catalysis of the hydrolysis of any O-glycosyl bond.	MF	hydrolase activity, hydrolyzing O-glycosyl compounds
tig00001_1632	GO:0003824	Catalysis of a biochemical reaction at physiological temperatures. In biologically catalyzed reactions, the reactants are known as substrates, and the catalysts are naturally occurring macromolecular substances known as enzymes. Enzymes possess specific binding sites for substrates, and are usually composed wholly or largely of protein, but RNA that has catalytic activity (ribozyme) is often also…	MF	catalytic activity
tig00001_1633	GO:0008982	Catalysis of the PEP-dependent, phosphoryl transfer-driven transport of substances across a membrane. The transport happens by catalysis of the reaction: protein N-phosphohistidine + sugar(out) = protein histidine + sugar phosphate(in). This differs from primary and secondary active transport in that the solute is modified during transport.	MF	protein-N(PI)-phosphohistidine-sugar phosphotransferase activity
tig00001_1634	GO:0000272	The chemical reactions and pathways resulting in the breakdown of a polysaccharide, a polymer of many (typically more than 10) monosaccharide residues linked glycosidically.	BP	polysaccharide catabolic process
tig00001_1634	GO:0003824	Catalysis of a biochemical reaction at physiological temperatures. In biologically catalyzed reactions, the reactants are known as substrates, and the catalysts are naturally occurring macromolecular substances known as enzymes. Enzymes possess specific binding sites for substrates, and are usually composed wholly or largely of protein, but RNA that has catalytic activity (ribozyme) is often also…	MF	catalytic activity
tig00001_1635	GO:0003723	Interacting selectively and non-covalently with an RNA molecule or a portion thereof.	MF	RNA binding
tig00001_1635	GO:0006355	Any process that modulates the frequency, rate or extent of cellular DNA-templated transcription.	BP	regulation of transcription, DNA-templated
tig00001_1638	GO:0000155	Catalysis of the phosphorylation of a histidine residue in response to detection of an extracellular signal such as a chemical ligand or change in environment, to initiate a change in cell state or activity. The two-component sensor is a histidine kinase that autophosphorylates a histidine residue in its active site. The phosphate is then transferred to an aspartate residue in a downstream respon…	MF	phosphorelay sensor kinase activity
tig00001_1638	GO:0007165	The cellular process in which a signal is conveyed to trigger a change in the activity or state of a cell. Signal transduction begins with reception of a signal (e.g. a ligand binding to a receptor or receptor activation by a stimulus such as light), or for signal transduction in the absence of ligand, signal-withdrawal or the activity of a constitutively active receptor. Signal transduction ends…	BP	signal transduction
tig00001_1638	GO:0016310	The process of introducing a phosphate group into a molecule, usually with the formation of a phosphoric ester, a phosphoric anhydride or a phosphoric amide.	BP	phosphorylation
tig00001_1639	GO:0000160	A conserved series of molecular signals found in prokaryotes and eukaryotes; involves autophosphorylation of a histidine kinase and the transfer of the phosphate group to an aspartate that then acts as a phospho-donor to response regulator proteins.	BP	phosphorelay signal transduction system
tig00001_1639	GO:0003677	Any molecular function by which a gene product interacts selectively and non-covalently with DNA (deoxyribonucleic acid).	MF	DNA binding
tig00001_1640	GO:0004616	Catalysis of the reaction: 6-phospho-D-gluconate + NADP+ = D-ribulose 5-phosphate + CO2 + NADPH + H+.	MF	phosphogluconate dehydrogenase (decarboxylating) activity
tig00001_1640	GO:0016491	Catalysis of an oxidation-reduction (redox) reaction, a reversible chemical reaction in which the oxidation state of an atom or atoms within a molecule is altered. One substrate acts as a hydrogen or electron donor and becomes oxidized, while the other acts as hydrogen or electron acceptor and becomes reduced.	MF	oxidoreductase activity
tig00001_1640	GO:0055114	A metabolic process that results in the removal or addition of one or more electrons to or from a substance, with or without the concomitant removal or addition of a proton or protons.	BP	oxidation-reduction process
tig00001_1640	GO:0050661	Interacting selectively and non-covalently with nicotinamide-adenine dinucleotide phosphate, a coenzyme involved in many redox and biosynthetic reactions; binding may be to either the oxidized form, NADP+, or the reduced form, NADPH.	MF	NADP binding
tig00001_1641	GO:0003735	The action of a molecule that contributes to the structural integrity of the ribosome.	MF	structural constituent of ribosome
tig00001_1641	GO:0006412	The cellular metabolic process in which a protein is formed, using the sequence of a mature mRNA or circRNA molecule to specify the sequence of amino acids in a polypeptide chain. Translation is mediated by the ribosome, and begins with the formation of a ternary complex between aminoacylated initiator methionine tRNA, GTP, and initiation factor 2, which subsequently associates with the small sub…	BP	translation
tig00001_1643	GO:0003700	A protein or a member of a complex that interacts selectively and non-covalently with a specific DNA sequence (sometimes referred to as a motif) within the regulatory region of a gene to modulate transcription. Regulatory regions include promoters (proximal and distal) and enhancers. Genes are transcriptional units, and include bacterial operons.	MF	DNA-binding transcription factor activity
tig00001_1644	GO:0000287	Interacting selectively and non-covalently with magnesium (Mg) ions.	MF	magnesium ion binding
tig00001_1644	GO:0003824	Catalysis of a biochemical reaction at physiological temperatures. In biologically catalyzed reactions, the reactants are known as substrates, and the catalysts are naturally occurring macromolecular substances known as enzymes. Enzymes possess specific binding sites for substrates, and are usually composed wholly or largely of protein, but RNA that has catalytic activity (ribozyme) is often also…	MF	catalytic activity
tig00001_1644	GO:0004743	Catalysis of the reaction: ATP + pyruvate = ADP + phosphoenolpyruvate.	MF	pyruvate kinase activity
tig00001_1644	GO:0016310	The process of introducing a phosphate group into a molecule, usually with the formation of a phosphoric ester, a phosphoric anhydride or a phosphoric amide.	BP	phosphorylation
tig00001_1645	GO:0003872	Catalysis of the reaction: ATP + D-fructose-6-phosphate = ADP + D-fructose 1,6-bisphosphate.	MF	6-phosphofructokinase activity
tig00001_1645	GO:0005524	Interacting selectively and non-covalently with ATP, adenosine 5'-triphosphate, a universally important coenzyme and enzyme regulator.	MF	ATP binding
tig00001_1646	GO:0006260	The cellular metabolic process in which a cell duplicates one or more molecules of DNA. DNA replication begins when specific sequences, known as origins of replication, are recognized and bound by initiation proteins, and ends when the original DNA molecule has been completely duplicated and the copies topologically separated. The unit of replication usually corresponds to the genome of the cell,…	BP	DNA replication
tig00001_1646	GO:0003824	Catalysis of a biochemical reaction at physiological temperatures. In biologically catalyzed reactions, the reactants are known as substrates, and the catalysts are naturally occurring macromolecular substances known as enzymes. Enzymes possess specific binding sites for substrates, and are usually composed wholly or largely of protein, but RNA that has catalytic activity (ribozyme) is often also…	MF	catalytic activity
tig00001_1648	GO:0016021	The component of a membrane consisting of the gene products and protein complexes having at least some part of their peptide sequence embedded in the hydrophobic region of the membrane.	CC	integral component of membrane
tig00001_1648	GO:0022857	Enables the transfer of a substance, usually a specific substance or a group of related substances, from one side of a membrane to the other.	MF	transmembrane transporter activity
tig00001_1649	GO:0016020	A lipid bilayer along with all the proteins and protein complexes embedded in it an attached to it.	CC	membrane
tig00001_164	GO:0003735	The action of a molecule that contributes to the structural integrity of the ribosome.	MF	structural constituent of ribosome
tig00001_1650	GO:0016787	Catalysis of the hydrolysis of various bonds, e.g. C-O, C-N, C-C, phosphoric anhydride bonds, etc. Hydrolase is the systematic name for any enzyme of EC class 3.	MF	hydrolase activity
tig00001_1651	GO:0008658	Interacting selectively and non-covalently with penicillin, any antibiotic that contains the condensed beta-lactamthiazolidine ring system.	MF	penicillin binding
tig00001_1652	GO:0097367	Interacting selectively and non-covalently with a carbohydrate derivative.	MF	carbohydrate derivative binding
tig00001_1652	GO:0003700	A protein or a member of a complex that interacts selectively and non-covalently with a specific DNA sequence (sometimes referred to as a motif) within the regulatory region of a gene to modulate transcription. Regulatory regions include promoters (proximal and distal) and enhancers. Genes are transcriptional units, and include bacterial operons.	MF	DNA-binding transcription factor activity
tig00001_1653	GO:0004829	Catalysis of the reaction: ATP + L-threonine + tRNA(Thr) = AMP + diphosphate + L-threonyl-tRNA(Thr).	MF	threonine-tRNA ligase activity
tig00001_1653	GO:0000166	Interacting selectively and non-covalently with a nucleotide, any compound consisting of a nucleoside that is esterified with (ortho)phosphate or an oligophosphate at any hydroxyl group on the ribose or deoxyribose.	MF	nucleotide binding
tig00001_1653	GO:0004812	Catalysis of the formation of aminoacyl-tRNA from ATP, amino acid, and tRNA with the release of diphosphate and AMP.	MF	aminoacyl-tRNA ligase activity
tig00001_1654	GO:0006725	The chemical reactions and pathways involving aromatic compounds, any organic compound characterized by one or more planar rings, each of which contains conjugated double bonds and delocalized pi electrons, as carried out by individual cells.	BP	cellular aromatic compound metabolic process
tig00001_1655	GO:0016021	The component of a membrane consisting of the gene products and protein complexes having at least some part of their peptide sequence embedded in the hydrophobic region of the membrane.	CC	integral component of membrane
tig00001_1655	GO:0006812	The directed movement of cations, atoms or small molecules with a net positive charge, into, out of or within a cell, or between cells, by means of some agent such as a transporter or pore.	BP	cation transport
tig00001_1655	GO:0000166	Interacting selectively and non-covalently with a nucleotide, any compound consisting of a nucleoside that is esterified with (ortho)phosphate or an oligophosphate at any hydroxyl group on the ribose or deoxyribose.	MF	nucleotide binding
tig00001_1656	GO:0003677	Any molecular function by which a gene product interacts selectively and non-covalently with DNA (deoxyribonucleic acid).	MF	DNA binding
tig00001_1656	GO:0005524	Interacting selectively and non-covalently with ATP, adenosine 5'-triphosphate, a universally important coenzyme and enzyme regulator.	MF	ATP binding
tig00001_165	GO:0003723	Interacting selectively and non-covalently with an RNA molecule or a portion thereof.	MF	RNA binding
tig00001_165	GO:0003676	Interacting selectively and non-covalently with any nucleic acid.	MF	nucleic acid binding
tig00001_1663	GO:0009435	The chemical reactions and pathways resulting in the formation of nicotinamide adenine dinucleotide, a coenzyme present in most living cells and derived from the B vitamin nicotinic acid; biosynthesis may be of either the oxidized form, NAD, or the reduced form, NADH.	BP	NAD biosynthetic process
tig00001_1663	GO:0003824	Catalysis of a biochemical reaction at physiological temperatures. In biologically catalyzed reactions, the reactants are known as substrates, and the catalysts are naturally occurring macromolecular substances known as enzymes. Enzymes possess specific binding sites for substrates, and are usually composed wholly or largely of protein, but RNA that has catalytic activity (ribozyme) is often also…	MF	catalytic activity
tig00001_1664	GO:0003723	Interacting selectively and non-covalently with an RNA molecule or a portion thereof.	MF	RNA binding
tig00001_1665	GO:0005525	Interacting selectively and non-covalently with GTP, guanosine triphosphate.	MF	GTP binding
tig00001_1666	GO:0016787	Catalysis of the hydrolysis of various bonds, e.g. C-O, C-N, C-C, phosphoric anhydride bonds, etc. Hydrolase is the systematic name for any enzyme of EC class 3.	MF	hydrolase activity
tig00001_1666	GO:0008962	Catalysis of the reaction: phosphatidylglycerophosphate + H2O = phosphatidylglycerol + phosphate.	MF	phosphatidylglycerophosphatase activity
tig00001_1667	GO:0003989	Catalysis of the reaction: ATP + acetyl-CoA + HCO3- = ADP + phosphate + malonyl-CoA.	MF	acetyl-CoA carboxylase activity
tig00001_1667	GO:0016874	Catalysis of the joining of two substances, or two groups within a single molecule, with the concomitant hydrolysis of the diphosphate bond in ATP or a similar triphosphate.	MF	ligase activity
tig00001_1668	GO:0003989	Catalysis of the reaction: ATP + acetyl-CoA + HCO3- = ADP + phosphate + malonyl-CoA.	MF	acetyl-CoA carboxylase activity
tig00001_1669	GO:0005524	Interacting selectively and non-covalently with ATP, adenosine 5'-triphosphate, a universally important coenzyme and enzyme regulator.	MF	ATP binding
tig00001_1669	GO:0016874	Catalysis of the joining of two substances, or two groups within a single molecule, with the concomitant hydrolysis of the diphosphate bond in ATP or a similar triphosphate.	MF	ligase activity
tig00001_166	GO:0016021	The component of a membrane consisting of the gene products and protein complexes having at least some part of their peptide sequence embedded in the hydrophobic region of the membrane.	CC	integral component of membrane
tig00001_1670	GO:0006633	The chemical reactions and pathways resulting in the formation of a fatty acid, any of the aliphatic monocarboxylic acids that can be liberated by hydrolysis from naturally occurring fats and oils. Fatty acids are predominantly straight-chain acids of 4 to 24 carbon atoms, which may be saturated or unsaturated; branched fatty acids and hydroxy fatty acids also occur, and very long chain acids of …	BP	fatty acid biosynthetic process
tig00001_1671	GO:0003989	Catalysis of the reaction: ATP + acetyl-CoA + HCO3- = ADP + phosphate + malonyl-CoA.	MF	acetyl-CoA carboxylase activity
tig00001_1672	GO:0004315	Catalysis of the reaction: acyl-[acyl-carrier protein] + malonyl-[acyl-carrier protein] = 3-oxoacyl-[acyl-carrier protein] + CO2 + [acyl-carrier protein].	MF	3-oxoacyl-[acyl-carrier-protein] synthase activity
tig00001_1672	GO:0016746	Catalysis of the transfer of an acyl group from one compound (donor) to another (acceptor).	MF	transferase activity, transferring acyl groups
tig00001_1672	GO:0006633	The chemical reactions and pathways resulting in the formation of a fatty acid, any of the aliphatic monocarboxylic acids that can be liberated by hydrolysis from naturally occurring fats and oils. Fatty acids are predominantly straight-chain acids of 4 to 24 carbon atoms, which may be saturated or unsaturated; branched fatty acids and hydroxy fatty acids also occur, and very long chain acids of …	BP	fatty acid biosynthetic process
tig00001_1673	GO:0004316	Catalysis of the reaction: (3R)-3-hydroxyacyl-[acyl-carrier protein] + NADP+ = 3-oxoacyl-[acyl-carrier protein] + NADPH + H+.	MF	3-oxoacyl-[acyl-carrier-protein] reductase (NADPH) activity
tig00001_1673	GO:0016491	Catalysis of an oxidation-reduction (redox) reaction, a reversible chemical reaction in which the oxidation state of an atom or atoms within a molecule is altered. One substrate acts as a hydrogen or electron donor and becomes oxidized, while the other acts as hydrogen or electron acceptor and becomes reduced.	MF	oxidoreductase activity
tig00001_1673	GO:0055114	A metabolic process that results in the removal or addition of one or more electrons to or from a substance, with or without the concomitant removal or addition of a proton or protons.	BP	oxidation-reduction process
tig00001_1674	GO:0016740	Catalysis of the transfer of a group, e.g. a methyl group, glycosyl group, acyl group, phosphorus-containing, or other groups, from one compound (generally regarded as the donor) to another compound (generally regarded as the acceptor). Transferase is the systematic name for any enzyme of EC class 2.	MF	transferase activity
tig00001_1674	GO:0004314	Catalysis of the reaction: malonyl-CoA + [acyl-carrier protein] = CoA + malonyl-[acyl-carrier protein].	MF	[acyl-carrier-protein] S-malonyltransferase activity
tig00001_1675	GO:0006633	The chemical reactions and pathways resulting in the formation of a fatty acid, any of the aliphatic monocarboxylic acids that can be liberated by hydrolysis from naturally occurring fats and oils. Fatty acids are predominantly straight-chain acids of 4 to 24 carbon atoms, which may be saturated or unsaturated; branched fatty acids and hydroxy fatty acids also occur, and very long chain acids of …	BP	fatty acid biosynthetic process
tig00001_1676	GO:0016746	Catalysis of the transfer of an acyl group from one compound (donor) to another (acceptor).	MF	transferase activity, transferring acyl groups
tig00001_1676	GO:0004315	Catalysis of the reaction: acyl-[acyl-carrier protein] + malonyl-[acyl-carrier protein] = 3-oxoacyl-[acyl-carrier protein] + CO2 + [acyl-carrier protein].	MF	3-oxoacyl-[acyl-carrier-protein] synthase activity
tig00001_1677	GO:0003700	A protein or a member of a complex that interacts selectively and non-covalently with a specific DNA sequence (sometimes referred to as a motif) within the regulatory region of a gene to modulate transcription. Regulatory regions include promoters (proximal and distal) and enhancers. Genes are transcriptional units, and include bacterial operons.	MF	DNA-binding transcription factor activity
tig00001_167	GO:0015079	Enables the transfer of potassium ions (K+) from one side of a membrane to the other.	MF	potassium ion transmembrane transporter activity
tig00001_1680	GO:0016491	Catalysis of an oxidation-reduction (redox) reaction, a reversible chemical reaction in which the oxidation state of an atom or atoms within a molecule is altered. One substrate acts as a hydrogen or electron donor and becomes oxidized, while the other acts as hydrogen or electron acceptor and becomes reduced.	MF	oxidoreductase activity
tig00001_1680	GO:0055114	A metabolic process that results in the removal or addition of one or more electrons to or from a substance, with or without the concomitant removal or addition of a proton or protons.	BP	oxidation-reduction process
tig00001_1680	GO:0051287	Interacting selectively and non-covalently with nicotinamide adenine dinucleotide, a coenzyme involved in many redox and biosynthetic reactions; binding may be to either the oxidized form, NAD+, or the reduced form, NADH.	MF	NAD binding
tig00001_1680	GO:0050661	Interacting selectively and non-covalently with nicotinamide-adenine dinucleotide phosphate, a coenzyme involved in many redox and biosynthetic reactions; binding may be to either the oxidized form, NADP+, or the reduced form, NADPH.	MF	NADP binding
tig00001_1683	GO:0016772	Catalysis of the transfer of a phosphorus-containing group from one compound (donor) to another (acceptor).	MF	transferase activity, transferring phosphorus-containing groups
tig00001_1683	GO:0016310	The process of introducing a phosphate group into a molecule, usually with the formation of a phosphoric ester, a phosphoric anhydride or a phosphoric amide.	BP	phosphorylation
tig00001_1683	GO:0009401	The uptake and phosphorylation of specific carbohydrates from the extracellular environment; uptake and phosphorylation are coupled, making the PTS a link between the uptake and metabolism of sugars; phosphoenolpyruvate is the original phosphate donor; phosphoenolpyruvate passes the phosphate via a signal transduction pathway, to enzyme 1 (E1), which in turn passes it on to the histidine protein,…	BP	phosphoenolpyruvate-dependent sugar phosphotransferase system
tig00001_1683	GO:0003824	Catalysis of a biochemical reaction at physiological temperatures. In biologically catalyzed reactions, the reactants are known as substrates, and the catalysts are naturally occurring macromolecular substances known as enzymes. Enzymes possess specific binding sites for substrates, and are usually composed wholly or largely of protein, but RNA that has catalytic activity (ribozyme) is often also…	MF	catalytic activity
tig00001_1683	GO:0008965	Catalysis of the reaction: phosphoenolpyruvate + protein L-histidine = pyruvate + protein N(pi)-phospho-L-histidine.	MF	phosphoenolpyruvate-protein phosphotransferase activity
tig00001_1685	GO:0005524	Interacting selectively and non-covalently with ATP, adenosine 5'-triphosphate, a universally important coenzyme and enzyme regulator.	MF	ATP binding
tig00001_1685	GO:0005515	Interacting selectively and non-covalently with any protein or protein complex (a complex of two or more proteins that may include other nonprotein molecules).	MF	protein binding
tig00001_1688	GO:0003924	Catalysis of the reaction: GTP + H2O = GDP + phosphate.	MF	GTPase activity
tig00001_1688	GO:0005525	Interacting selectively and non-covalently with GTP, guanosine triphosphate.	MF	GTP binding
tig00001_1689	GO:0050660	Interacting selectively and non-covalently with FAD, flavin-adenine dinucleotide, the coenzyme or the prosthetic group of various flavoprotein oxidoreductase enzymes, in either the oxidized form, FAD, or the reduced form, FADH2.	MF	flavin adenine dinucleotide binding
tig00001_168	GO:0050660	Interacting selectively and non-covalently with FAD, flavin-adenine dinucleotide, the coenzyme or the prosthetic group of various flavoprotein oxidoreductase enzymes, in either the oxidized form, FAD, or the reduced form, FADH2.	MF	flavin adenine dinucleotide binding
tig00001_1691	GO:0004343	Catalysis of the reaction: D-glucosamine 6-phosphate + acetyl-CoA = N-acetyl-D-glucosamine 6-phosphate + CoA + H(+).	MF	glucosamine 6-phosphate N-acetyltransferase activity
tig00001_1691	GO:0008080	Catalysis of the transfer of an acetyl group to a nitrogen atom on the acceptor molecule.	MF	N-acetyltransferase activity
tig00001_1693	GO:0006284	In base excision repair, an altered base is removed by a DNA glycosylase enzyme, followed by excision of the resulting sugar phosphate. The small gap left in the DNA helix is filled in by the sequential action of DNA polymerase and DNA ligase.	BP	base-excision repair
tig00001_1693	GO:0016787	Catalysis of the hydrolysis of various bonds, e.g. C-O, C-N, C-C, phosphoric anhydride bonds, etc. Hydrolase is the systematic name for any enzyme of EC class 3.	MF	hydrolase activity
tig00001_1693	GO:0051539	Interacting selectively and non-covalently with a 4 iron, 4 sulfur (4Fe-4S) cluster; this cluster consists of four iron atoms, with the inorganic sulfur atoms found between the irons and acting as bridging ligands.	MF	4 iron, 4 sulfur cluster binding
tig00001_1693	GO:0003824	Catalysis of a biochemical reaction at physiological temperatures. In biologically catalyzed reactions, the reactants are known as substrates, and the catalysts are naturally occurring macromolecular substances known as enzymes. Enzymes possess specific binding sites for substrates, and are usually composed wholly or largely of protein, but RNA that has catalytic activity (ribozyme) is often also…	MF	catalytic activity
tig00001_1693	GO:0003677	Any molecular function by which a gene product interacts selectively and non-covalently with DNA (deoxyribonucleic acid).	MF	DNA binding
tig00001_1694	GO:0006282	Any process that modulates the frequency, rate or extent of DNA repair.	BP	regulation of DNA repair
tig00001_1695	GO:0006396	Any process involved in the conversion of one or more primary RNA transcripts into one or more mature RNA molecules.	BP	RNA processing
tig00001_1697	GO:0016021	The component of a membrane consisting of the gene products and protein complexes having at least some part of their peptide sequence embedded in the hydrophobic region of the membrane.	CC	integral component of membrane
tig00001_1699	GO:0003676	Interacting selectively and non-covalently with any nucleic acid.	MF	nucleic acid binding
tig00001_169	GO:0015297	Enables the active transport of a solute across a membrane by a mechanism whereby two or more species are transported in opposite directions in a tightly coupled process not directly linked to a form of energy other than chemiosmotic energy. The reaction is: solute A(out) + solute B(in) = solute A(in) + solute B(out).	MF	antiporter activity
tig00001_16	GO:0005524	Interacting selectively and non-covalently with ATP, adenosine 5'-triphosphate, a universally important coenzyme and enzyme regulator.	MF	ATP binding
tig00001_1700	GO:0004784	Catalysis of the reaction: 2 superoxide + 2 H+ = O2 + hydrogen peroxide.	MF	superoxide dismutase activity
tig00001_1701	GO:0000271	The chemical reactions and pathways resulting in the formation of a polysaccharide, a polymer of many (typically more than 10) monosaccharide residues linked glycosidically.	BP	polysaccharide biosynthetic process
tig00001_1702	GO:0006812	The directed movement of cations, atoms or small molecules with a net positive charge, into, out of or within a cell, or between cells, by means of some agent such as a transporter or pore.	BP	cation transport
tig00001_1704	GO:0016616	Catalysis of an oxidation-reduction (redox) reaction in which a CH-OH group acts as a hydrogen or electron donor and reduces NAD+ or NADP.	MF	oxidoreductase activity, acting on the CH-OH group of donors, NAD or NADP as acceptor
tig00001_1704	GO:0051287	Interacting selectively and non-covalently with nicotinamide adenine dinucleotide, a coenzyme involved in many redox and biosynthetic reactions; binding may be to either the oxidized form, NAD+, or the reduced form, NADH.	MF	NAD binding
tig00001_1706	GO:0006813	The directed movement of potassium ions (K+) into, out of or within a cell, or between cells, by means of some agent such as a transporter or pore.	BP	potassium ion transport
tig00001_1707	GO:0000160	A conserved series of molecular signals found in prokaryotes and eukaryotes; involves autophosphorylation of a histidine kinase and the transfer of the phosphate group to an aspartate that then acts as a phospho-donor to response regulator proteins.	BP	phosphorelay signal transduction system
tig00001_1707	GO:0006355	Any process that modulates the frequency, rate or extent of cellular DNA-templated transcription.	BP	regulation of transcription, DNA-templated
tig00001_1707	GO:0003677	Any molecular function by which a gene product interacts selectively and non-covalently with DNA (deoxyribonucleic acid).	MF	DNA binding
tig00001_1708	GO:0000155	Catalysis of the phosphorylation of a histidine residue in response to detection of an extracellular signal such as a chemical ligand or change in environment, to initiate a change in cell state or activity. The two-component sensor is a histidine kinase that autophosphorylates a histidine residue in its active site. The phosphate is then transferred to an aspartate residue in a downstream respon…	MF	phosphorelay sensor kinase activity
tig00001_1709	GO:0016021	The component of a membrane consisting of the gene products and protein complexes having at least some part of their peptide sequence embedded in the hydrophobic region of the membrane.	CC	integral component of membrane
tig00001_1710	GO:0003677	Any molecular function by which a gene product interacts selectively and non-covalently with DNA (deoxyribonucleic acid).	MF	DNA binding
tig00001_1710	GO:0070063	Interacting selectively and non-covalently with an RNA polymerase molecule or complex.	MF	RNA polymerase binding
tig00001_1713	GO:0003824	Catalysis of a biochemical reaction at physiological temperatures. In biologically catalyzed reactions, the reactants are known as substrates, and the catalysts are naturally occurring macromolecular substances known as enzymes. Enzymes possess specific binding sites for substrates, and are usually composed wholly or largely of protein, but RNA that has catalytic activity (ribozyme) is often also…	MF	catalytic activity
tig00001_1719	GO:0003824	Catalysis of a biochemical reaction at physiological temperatures. In biologically catalyzed reactions, the reactants are known as substrates, and the catalysts are naturally occurring macromolecular substances known as enzymes. Enzymes possess specific binding sites for substrates, and are usually composed wholly or largely of protein, but RNA that has catalytic activity (ribozyme) is often also…	MF	catalytic activity
tig00001_171	GO:0003735	The action of a molecule that contributes to the structural integrity of the ribosome.	MF	structural constituent of ribosome
tig00001_171	GO:0006412	The cellular metabolic process in which a protein is formed, using the sequence of a mature mRNA or circRNA molecule to specify the sequence of amino acids in a polypeptide chain. Translation is mediated by the ribosome, and begins with the formation of a ternary complex between aminoacylated initiator methionine tRNA, GTP, and initiation factor 2, which subsequently associates with the small sub…	BP	translation
tig00001_1720	GO:0070567	Catalysis of the transfer of a cytidylyl group to an acceptor.	MF	cytidylyltransferase activity
tig00001_1726	GO:0005524	Interacting selectively and non-covalently with ATP, adenosine 5'-triphosphate, a universally important coenzyme and enzyme regulator.	MF	ATP binding
tig00001_1727	GO:0016021	The component of a membrane consisting of the gene products and protein complexes having at least some part of their peptide sequence embedded in the hydrophobic region of the membrane.	CC	integral component of membrane
tig00001_1727	GO:0016020	A lipid bilayer along with all the proteins and protein complexes embedded in it an attached to it.	CC	membrane
tig00001_172	GO:0001522	The intramolecular conversion of uridine to pseudouridine within an RNA molecule. This posttranscriptional base modification occurs in tRNA, rRNA, and snRNAs.	BP	pseudouridine synthesis
tig00001_172	GO:0003723	Interacting selectively and non-covalently with an RNA molecule or a portion thereof.	MF	RNA binding
tig00001_1731	GO:0008460	Catalysis of the reaction: dTDP-glucose = dTDP-4-dehydro-6-deoxy-alpha-D-glucose + H(2)O.	MF	dTDP-glucose 4,6-dehydratase activity
tig00001_1732	GO:0008830	Catalysis of the reaction: dTDP-4-dehydro-6-deoxy-alpha-D-glucose = dTDP-4-dehydro-6-deoxy-L-mannose.	MF	dTDP-4-dehydrorhamnose 3,5-epimerase activity
tig00001_1733	GO:0008879	Catalysis of the reaction: alpha-D-glucose 1-phosphate + dTTP = diphosphate + dTDP-glucose.	MF	glucose-1-phosphate thymidylyltransferase activity
tig00001_1733	GO:0009058	The chemical reactions and pathways resulting in the formation of substances; typically the energy-requiring part of metabolism in which simpler substances are transformed into more complex ones.	BP	biosynthetic process
tig00001_1737	GO:0008963	Catalysis of the reaction: UDP-N-acetylmuramoyl-L-alanyl-D-glutamyl-L-lysyl-D-alanyl-D-alanine + undecaprenyl phosphate = UMP + N-acetylmuramoyl-L-alanyl-D-glutamyl-L-lysyl-D-alanyl-D-alanine-diphosphoundecaprenol.	MF	phospho-N-acetylmuramoyl-pentapeptide-transferase activity
tig00001_1739	GO:0006508	The hydrolysis of proteins into smaller polypeptides and/or amino acids by cleavage of their peptide bonds.	BP	proteolysis
tig00001_173	GO:0016787	Catalysis of the hydrolysis of various bonds, e.g. C-O, C-N, C-C, phosphoric anhydride bonds, etc. Hydrolase is the systematic name for any enzyme of EC class 3.	MF	hydrolase activity
tig00001_1740	GO:0010181	Interacting selectively and non-covalently with flavin mono nucleotide. Flavin mono nucleotide (FMN) is the coenzyme or the prosthetic group of various flavoprotein oxidoreductase enzymes.	MF	FMN binding
tig00001_1740	GO:0009055	Any molecular entity that serves as an electron acceptor and electron donor in an electron transport chain. An electron transport chain is a process in which a series of electron carriers operate together to transfer electrons from donors to any of several different terminal electron acceptors to generate a transmembrane electrochemical gradient.	MF	electron transfer activity
tig00001_1741	GO:0003677	Any molecular function by which a gene product interacts selectively and non-covalently with DNA (deoxyribonucleic acid).	MF	DNA binding
tig00001_1742	GO:0004177	Catalysis of the hydrolysis of N-terminal amino acid residues from in a polypeptide chain.	MF	aminopeptidase activity
tig00001_1744	GO:0008080	Catalysis of the transfer of an acetyl group to a nitrogen atom on the acceptor molecule.	MF	N-acetyltransferase activity
tig00001_1748	GO:0008982	Catalysis of the PEP-dependent, phosphoryl transfer-driven transport of substances across a membrane. The transport happens by catalysis of the reaction: protein N-phosphohistidine + sugar(out) = protein histidine + sugar phosphate(in). This differs from primary and secondary active transport in that the solute is modified during transport.	MF	protein-N(PI)-phosphohistidine-sugar phosphotransferase activity
tig00001_1749	GO:0009401	The uptake and phosphorylation of specific carbohydrates from the extracellular environment; uptake and phosphorylation are coupled, making the PTS a link between the uptake and metabolism of sugars; phosphoenolpyruvate is the original phosphate donor; phosphoenolpyruvate passes the phosphate via a signal transduction pathway, to enzyme 1 (E1), which in turn passes it on to the histidine protein,…	BP	phosphoenolpyruvate-dependent sugar phosphotransferase system
tig00001_174	GO:0005524	Interacting selectively and non-covalently with ATP, adenosine 5'-triphosphate, a universally important coenzyme and enzyme regulator.	MF	ATP binding
tig00001_174	GO:0004849	Catalysis of the reaction: ATP + uridine = ADP + UMP.	MF	uridine kinase activity
tig00001_1750	GO:0008982	Catalysis of the PEP-dependent, phosphoryl transfer-driven transport of substances across a membrane. The transport happens by catalysis of the reaction: protein N-phosphohistidine + sugar(out) = protein histidine + sugar phosphate(in). This differs from primary and secondary active transport in that the solute is modified during transport.	MF	protein-N(PI)-phosphohistidine-sugar phosphotransferase activity
tig00001_1751	GO:0009401	The uptake and phosphorylation of specific carbohydrates from the extracellular environment; uptake and phosphorylation are coupled, making the PTS a link between the uptake and metabolism of sugars; phosphoenolpyruvate is the original phosphate donor; phosphoenolpyruvate passes the phosphate via a signal transduction pathway, to enzyme 1 (E1), which in turn passes it on to the histidine protein,…	BP	phosphoenolpyruvate-dependent sugar phosphotransferase system
tig00001_1751	GO:0006355	Any process that modulates the frequency, rate or extent of cellular DNA-templated transcription.	BP	regulation of transcription, DNA-templated
tig00001_1751	GO:0005524	Interacting selectively and non-covalently with ATP, adenosine 5'-triphosphate, a universally important coenzyme and enzyme regulator.	MF	ATP binding
tig00001_1751	GO:0003677	Any molecular function by which a gene product interacts selectively and non-covalently with DNA (deoxyribonucleic acid).	MF	DNA binding
tig00001_1752	GO:0003676	Interacting selectively and non-covalently with any nucleic acid.	MF	nucleic acid binding
tig00001_1753	GO:0016491	Catalysis of an oxidation-reduction (redox) reaction, a reversible chemical reaction in which the oxidation state of an atom or atoms within a molecule is altered. One substrate acts as a hydrogen or electron donor and becomes oxidized, while the other acts as hydrogen or electron acceptor and becomes reduced.	MF	oxidoreductase activity
tig00001_1754	GO:0003677	Any molecular function by which a gene product interacts selectively and non-covalently with DNA (deoxyribonucleic acid).	MF	DNA binding
tig00001_1756	GO:0046914	Interacting selectively and non-covalently with a transition metal ions; a transition metal is an element whose atom has an incomplete d-subshell of extranuclear electrons, or which gives rise to a cation or cations with an incomplete d-subshell. Transition metals often have more than one valency state. Biologically relevant transition metals include vanadium, manganese, iron, copper, cobalt, nic…	MF	transition metal ion binding
tig00001_1756	GO:0003677	Any molecular function by which a gene product interacts selectively and non-covalently with DNA (deoxyribonucleic acid).	MF	DNA binding
tig00001_1756	GO:0003700	A protein or a member of a complex that interacts selectively and non-covalently with a specific DNA sequence (sometimes referred to as a motif) within the regulatory region of a gene to modulate transcription. Regulatory regions include promoters (proximal and distal) and enhancers. Genes are transcriptional units, and include bacterial operons.	MF	DNA-binding transcription factor activity
tig00001_1757	GO:0006006	The chemical reactions and pathways involving glucose, the aldohexose gluco-hexose. D-glucose is dextrorotatory and is sometimes known as dextrose; it is an important source of energy for living organisms and is found free as well as combined in homo- and hetero-oligosaccharides and polysaccharides.	BP	glucose metabolic process
tig00001_1757	GO:0004345	Catalysis of the reaction: D-glucose 6-phosphate + NADP+ = D-glucono-1,5-lactone 6-phosphate + NADPH + H+.	MF	glucose-6-phosphate dehydrogenase activity
tig00001_1758	GO:0000049	Interacting selectively and non-covalently with transfer RNA.	MF	tRNA binding
tig00001_1758	GO:0000166	Interacting selectively and non-covalently with a nucleotide, any compound consisting of a nucleoside that is esterified with (ortho)phosphate or an oligophosphate at any hydroxyl group on the ribose or deoxyribose.	MF	nucleotide binding
tig00001_1758	GO:0004822	Catalysis of the reaction: L-isoleucine + ATP + tRNA(Ile) = L-isoleucyl-tRNA(Ile) + AMP + diphosphate + 2 H(+).	MF	isoleucine-tRNA ligase activity
tig00001_1758	GO:0004812	Catalysis of the formation of aminoacyl-tRNA from ATP, amino acid, and tRNA with the release of diphosphate and AMP.	MF	aminoacyl-tRNA ligase activity
tig00001_1758	GO:0002161	The hydrolysis of an incorrectly aminoacylated tRNA.	MF	aminoacyl-tRNA editing activity
tig00001_175	GO:0016021	The component of a membrane consisting of the gene products and protein complexes having at least some part of their peptide sequence embedded in the hydrophobic region of the membrane.	CC	integral component of membrane
tig00001_1760	GO:0003723	Interacting selectively and non-covalently with an RNA molecule or a portion thereof.	MF	RNA binding
tig00001_1761	GO:0090529	The assembly and arrangement of a cellular component that is composed of peptidoglycan and often chitin in addition to other materials and usually forms perpendicular to the long axis of a cell or hypha. It grows centripetally from the cell wall to the center of the cell and often functions in the compartmentalization of a cell into two daughter cells.	BP	cell septum assembly
tig00001_1762	GO:0030170	Interacting selectively and non-covalently with pyridoxal 5' phosphate, 3-hydroxy-5-(hydroxymethyl)-2-methyl4-pyridine carboxaldehyde 5' phosphate, the biologically active form of vitamin B6.	MF	pyridoxal phosphate binding
tig00001_1763	GO:0005525	Interacting selectively and non-covalently with GTP, guanosine triphosphate.	MF	GTP binding
tig00001_1763	GO:0003924	Catalysis of the reaction: GTP + H2O = GDP + phosphate.	MF	GTPase activity
tig00001_1766	GO:0050511	Catalysis of the reaction: Mur2Ac(oyl-L-Ala-gamma-D-Glu-L-Lys-D-Ala-D-Ala)-diphosphoundecaprenol + UDP-N-acetyl-D-glucosamine = GlcNAc-(1,4)-Mur2Ac(oyl-L-Ala-gamma-D-Glu-L-Lys-D-Ala-D-Ala)-diphosphoundecaprenol + UDP.	MF	undecaprenyldiphospho-muramoylpentapeptide beta-N-acetylglucosaminyltransferase activity
tig00001_1766	GO:0005975	The chemical reactions and pathways involving carbohydrates, any of a group of organic compounds based of the general formula Cx(H2O)y. Includes the formation of carbohydrate derivatives by the addition of a carbohydrate residue to another molecule.	BP	carbohydrate metabolic process
tig00001_1766	GO:0016758	Catalysis of the transfer of a hexosyl group from one compound (donor) to another (acceptor).	MF	transferase activity, transferring hexosyl groups
tig00001_1767	GO:0005524	Interacting selectively and non-covalently with ATP, adenosine 5'-triphosphate, a universally important coenzyme and enzyme regulator.	MF	ATP binding
tig00001_1768	GO:0008963	Catalysis of the reaction: UDP-N-acetylmuramoyl-L-alanyl-D-glutamyl-L-lysyl-D-alanyl-D-alanine + undecaprenyl phosphate = UMP + N-acetylmuramoyl-L-alanyl-D-glutamyl-L-lysyl-D-alanyl-D-alanine-diphosphoundecaprenol.	MF	phospho-N-acetylmuramoyl-pentapeptide-transferase activity
tig00001_1769	GO:0008658	Interacting selectively and non-covalently with penicillin, any antibiotic that contains the condensed beta-lactamthiazolidine ring system.	MF	penicillin binding
tig00001_176	GO:0008080	Catalysis of the transfer of an acetyl group to a nitrogen atom on the acceptor molecule.	MF	N-acetyltransferase activity
tig00001_1770	GO:0016021	The component of a membrane consisting of the gene products and protein complexes having at least some part of their peptide sequence embedded in the hydrophobic region of the membrane.	CC	integral component of membrane
tig00001_1771	GO:0008168	Catalysis of the transfer of a methyl group to an acceptor molecule.	MF	methyltransferase activity
tig00001_1772	GO:0003700	A protein or a member of a complex that interacts selectively and non-covalently with a specific DNA sequence (sometimes referred to as a motif) within the regulatory region of a gene to modulate transcription. Regulatory regions include promoters (proximal and distal) and enhancers. Genes are transcriptional units, and include bacterial operons.	MF	DNA-binding transcription factor activity
tig00001_1772	GO:0003677	Any molecular function by which a gene product interacts selectively and non-covalently with DNA (deoxyribonucleic acid).	MF	DNA binding
tig00001_1774	GO:0016020	A lipid bilayer along with all the proteins and protein complexes embedded in it an attached to it.	CC	membrane
tig00001_1776	GO:0005524	Interacting selectively and non-covalently with ATP, adenosine 5'-triphosphate, a universally important coenzyme and enzyme regulator.	MF	ATP binding
tig00001_1777	GO:0003700	A protein or a member of a complex that interacts selectively and non-covalently with a specific DNA sequence (sometimes referred to as a motif) within the regulatory region of a gene to modulate transcription. Regulatory regions include promoters (proximal and distal) and enhancers. Genes are transcriptional units, and include bacterial operons.	MF	DNA-binding transcription factor activity
tig00001_1777	GO:0034618	Interacting selectively and non-covalently with 2-amino-5-(carbamimidamido)pentanoic acid.	MF	arginine binding
tig00001_1778	GO:0003723	Interacting selectively and non-covalently with an RNA molecule or a portion thereof.	MF	RNA binding
tig00001_1778	GO:0008168	Catalysis of the transfer of a methyl group to an acceptor molecule.	MF	methyltransferase activity
tig00001_1779	GO:0008299	The chemical reactions and pathways resulting in the formation of any isoprenoid compound, isoprene (2-methylbuta-1,3-diene) or compounds containing or derived from linked isoprene (3-methyl-2-butenylene) residues.	BP	isoprenoid biosynthetic process
tig00001_1780	GO:0006308	The cellular DNA metabolic process resulting in the breakdown of DNA, deoxyribonucleic acid, one of the two main types of nucleic acid, consisting of a long unbranched macromolecule formed from one or two strands of linked deoxyribonucleotides, the 3'-phosphate group of each constituent deoxyribonucleotide being joined in 3',5'-phosphodiester linkage to the 5'-hydroxyl group of the deoxyribose mo…	BP	DNA catabolic process
tig00001_1781	GO:0008855	Catalysis of the exonucleolytic cleavage in either 5' to 3' or 3' to 5' direction to yield 5'-phosphomononucleotides.	MF	exodeoxyribonuclease VII activity
tig00001_1781	GO:0006308	The cellular DNA metabolic process resulting in the breakdown of DNA, deoxyribonucleic acid, one of the two main types of nucleic acid, consisting of a long unbranched macromolecule formed from one or two strands of linked deoxyribonucleotides, the 3'-phosphate group of each constituent deoxyribonucleotide being joined in 3',5'-phosphodiester linkage to the 5'-hydroxyl group of the deoxyribose mo…	BP	DNA catabolic process
tig00001_1781	GO:0003676	Interacting selectively and non-covalently with any nucleic acid.	MF	nucleic acid binding
tig00001_1782	GO:0004488	Catalysis of the reaction: 5,10-methylenetetrahydrofolate + NADP(+) = 5,10-methenyltetrahydrofolate + NADPH.	MF	methylenetetrahydrofolate dehydrogenase (NADP+) activity
tig00001_1782	GO:0003824	Catalysis of a biochemical reaction at physiological temperatures. In biologically catalyzed reactions, the reactants are known as substrates, and the catalysts are naturally occurring macromolecular substances known as enzymes. Enzymes possess specific binding sites for substrates, and are usually composed wholly or largely of protein, but RNA that has catalytic activity (ribozyme) is often also…	MF	catalytic activity
tig00001_1783	GO:0003723	Interacting selectively and non-covalently with an RNA molecule or a portion thereof.	MF	RNA binding
tig00001_1783	GO:0006353	The cellular process that completes DNA-templated transcription; the formation of phosphodiester bonds ceases, the RNA-DNA hybrid dissociates, and RNA polymerase releases the DNA.	BP	DNA-templated transcription, termination
tig00001_1785	GO:0016787	Catalysis of the hydrolysis of various bonds, e.g. C-O, C-N, C-C, phosphoric anhydride bonds, etc. Hydrolase is the systematic name for any enzyme of EC class 3.	MF	hydrolase activity
tig00001_1786	GO:0016021	The component of a membrane consisting of the gene products and protein complexes having at least some part of their peptide sequence embedded in the hydrophobic region of the membrane.	CC	integral component of membrane
tig00001_1788	GO:0009401	The uptake and phosphorylation of specific carbohydrates from the extracellular environment; uptake and phosphorylation are coupled, making the PTS a link between the uptake and metabolism of sugars; phosphoenolpyruvate is the original phosphate donor; phosphoenolpyruvate passes the phosphate via a signal transduction pathway, to enzyme 1 (E1), which in turn passes it on to the histidine protein,…	BP	phosphoenolpyruvate-dependent sugar phosphotransferase system
tig00001_1789	GO:0009401	The uptake and phosphorylation of specific carbohydrates from the extracellular environment; uptake and phosphorylation are coupled, making the PTS a link between the uptake and metabolism of sugars; phosphoenolpyruvate is the original phosphate donor; phosphoenolpyruvate passes the phosphate via a signal transduction pathway, to enzyme 1 (E1), which in turn passes it on to the histidine protein,…	BP	phosphoenolpyruvate-dependent sugar phosphotransferase system
tig00001_1790	GO:0005737	All of the contents of a cell excluding the plasma membrane and nucleus, but including other subcellular structures.	CC	cytoplasm
tig00001_1790	GO:0009401	The uptake and phosphorylation of specific carbohydrates from the extracellular environment; uptake and phosphorylation are coupled, making the PTS a link between the uptake and metabolism of sugars; phosphoenolpyruvate is the original phosphate donor; phosphoenolpyruvate passes the phosphate via a signal transduction pathway, to enzyme 1 (E1), which in turn passes it on to the histidine protein,…	BP	phosphoenolpyruvate-dependent sugar phosphotransferase system
tig00001_1791	GO:0005737	All of the contents of a cell excluding the plasma membrane and nucleus, but including other subcellular structures.	CC	cytoplasm
tig00001_1792	GO:0006355	Any process that modulates the frequency, rate or extent of cellular DNA-templated transcription.	BP	regulation of transcription, DNA-templated
tig00001_1792	GO:0009401	The uptake and phosphorylation of specific carbohydrates from the extracellular environment; uptake and phosphorylation are coupled, making the PTS a link between the uptake and metabolism of sugars; phosphoenolpyruvate is the original phosphate donor; phosphoenolpyruvate passes the phosphate via a signal transduction pathway, to enzyme 1 (E1), which in turn passes it on to the histidine protein,…	BP	phosphoenolpyruvate-dependent sugar phosphotransferase system
tig00001_1792	GO:0005524	Interacting selectively and non-covalently with ATP, adenosine 5'-triphosphate, a universally important coenzyme and enzyme regulator.	MF	ATP binding
tig00001_1792	GO:0008982	Catalysis of the PEP-dependent, phosphoryl transfer-driven transport of substances across a membrane. The transport happens by catalysis of the reaction: protein N-phosphohistidine + sugar(out) = protein histidine + sugar phosphate(in). This differs from primary and secondary active transport in that the solute is modified during transport.	MF	protein-N(PI)-phosphohistidine-sugar phosphotransferase activity
tig00001_1793	GO:0003735	The action of a molecule that contributes to the structural integrity of the ribosome.	MF	structural constituent of ribosome
tig00001_1795	GO:0005840	An intracellular organelle, about 200 A in diameter, consisting of RNA and protein. It is the site of protein biosynthesis resulting from translation of messenger RNA (mRNA). It consists of two subunits, one large and one small, each containing only protein and RNA. Both the ribosome and its subunits are characterized by their sedimentation coefficients, expressed in Svedberg units (symbol: S). H…	CC	ribosome
tig00001_1795	GO:0003723	Interacting selectively and non-covalently with an RNA molecule or a portion thereof.	MF	RNA binding
tig00001_1797	GO:0008271	Enables the secondary active transfer of sulfate from one side of a membrane to the other. Secondary active transport is the transfer of a solute across a membrane, up its concentration gradient. The transporter binds the solute and undergoes a series of conformational changes. Transport works equally well in either direction and is driven by a chemiosmotic source of energy. Secondary active tran…	MF	secondary active sulfate transmembrane transporter activity
tig00001_1797	GO:0008272	The directed movement of sulfate into, out of or within a cell, or between cells, by means of some agent such as a transporter or pore.	BP	sulfate transport
tig00001_1799	GO:0008171	Catalysis of the transfer of a methyl group to the oxygen atom of an acceptor molecule.	MF	O-methyltransferase activity
tig00001_1799	GO:0008033	The process in which a pre-tRNA molecule is converted to a mature tRNA, ready for addition of an aminoacyl group.	BP	tRNA processing
tig00001_1800	GO:0006465	The proteolytic removal of a signal peptide from a protein during or after transport to a specific location in the cell.	BP	signal peptide processing
tig00001_1802	GO:0009249	The lipoylation of peptidyl-lysine to form peptidyl-N6-lipoyl-L-lysine.	BP	protein lipoylation
tig00001_1802	GO:0006464	The covalent alteration of one or more amino acids occurring in proteins, peptides and nascent polypeptides (co-translational, post-translational modifications) occurring at the level of an individual cell. Includes the modification of charged tRNAs that are destined to occur in a protein (pre-translation modification).	BP	cellular protein modification process
tig00001_1807	GO:0019350	The chemical reactions and pathways resulting in the formation of teichoic acid, any polymer occurring in the cell wall, membrane or capsule of Gram-positive bacteria and containing chains of glycerol phosphate or ribitol phosphate residues.	BP	teichoic acid biosynthetic process
tig00001_1809	GO:0005524	Interacting selectively and non-covalently with ATP, adenosine 5'-triphosphate, a universally important coenzyme and enzyme regulator.	MF	ATP binding
tig00001_180	GO:0005737	All of the contents of a cell excluding the plasma membrane and nucleus, but including other subcellular structures.	CC	cytoplasm
tig00001_180	GO:0008716	Catalysis of the reaction: 2 D-alanine + ATP = D-alanyl-D-alanine + ADP + 2 H(+) + phosphate.	MF	D-alanine-D-alanine ligase activity
tig00001_180	GO:0005524	Interacting selectively and non-covalently with ATP, adenosine 5'-triphosphate, a universally important coenzyme and enzyme regulator.	MF	ATP binding
tig00001_1811	GO:0016020	A lipid bilayer along with all the proteins and protein complexes embedded in it an attached to it.	CC	membrane
tig00001_1811	GO:0055085	The process in which a solute is transported across a lipid bilayer, from one side of a membrane to the other.	BP	transmembrane transport
tig00001_1812	GO:0005524	Interacting selectively and non-covalently with ATP, adenosine 5'-triphosphate, a universally important coenzyme and enzyme regulator.	MF	ATP binding
tig00001_1813	GO:0003824	Catalysis of a biochemical reaction at physiological temperatures. In biologically catalyzed reactions, the reactants are known as substrates, and the catalysts are naturally occurring macromolecular substances known as enzymes. Enzymes possess specific binding sites for substrates, and are usually composed wholly or largely of protein, but RNA that has catalytic activity (ribozyme) is often also…	MF	catalytic activity
tig00001_1813	GO:0006260	The cellular metabolic process in which a cell duplicates one or more molecules of DNA. DNA replication begins when specific sequences, known as origins of replication, are recognized and bound by initiation proteins, and ends when the original DNA molecule has been completely duplicated and the copies topologically separated. The unit of replication usually corresponds to the genome of the cell,…	BP	DNA replication
tig00001_1814	GO:0003824	Catalysis of a biochemical reaction at physiological temperatures. In biologically catalyzed reactions, the reactants are known as substrates, and the catalysts are naturally occurring macromolecular substances known as enzymes. Enzymes possess specific binding sites for substrates, and are usually composed wholly or largely of protein, but RNA that has catalytic activity (ribozyme) is often also…	MF	catalytic activity
tig00001_1814	GO:0043365	Catalysis of the reaction: S-adenosyl-L-methionine + dihydroflavodoxin + [formate C-acetyltransferase]-glycine = 5'-deoxyadenosine + L-methionine + flavodoxin semiquinone + [formate C-acetyltransferase]-glycin-2-yl radical.	MF	[formate-C-acetyltransferase]-activating enzyme activity
tig00001_1815	GO:0003684	Interacting selectively and non-covalently with damaged DNA.	MF	damaged DNA binding
tig00001_1815	GO:0006281	The process of restoring DNA after damage. Genomes are subject to damage by chemical and physical agents in the environment (e.g. UV and ionizing radiations, chemical mutagens, fungal and bacterial toxins, etc.) and by free radicals or alkylating agents endogenously generated in metabolism. DNA is also damaged because of errors during its replication. A variety of different DNA repair pathways ha…	BP	DNA repair
tig00001_1815	GO:0003887	Catalysis of the reaction: deoxynucleoside triphosphate + DNA(n) = diphosphate + DNA(n+1); the synthesis of DNA from deoxyribonucleotide triphosphates in the presence of a DNA template and a 3'hydroxyl group.	MF	DNA-directed DNA polymerase activity
tig00001_1816	GO:0008168	Catalysis of the transfer of a methyl group to an acceptor molecule.	MF	methyltransferase activity
tig00001_1817	GO:0006260	The cellular metabolic process in which a cell duplicates one or more molecules of DNA. DNA replication begins when specific sequences, known as origins of replication, are recognized and bound by initiation proteins, and ends when the original DNA molecule has been completely duplicated and the copies topologically separated. The unit of replication usually corresponds to the genome of the cell,…	BP	DNA replication
tig00001_1819	GO:0003887	Catalysis of the reaction: deoxynucleoside triphosphate + DNA(n) = diphosphate + DNA(n+1); the synthesis of DNA from deoxyribonucleotide triphosphates in the presence of a DNA template and a 3'hydroxyl group.	MF	DNA-directed DNA polymerase activity
tig00001_181	GO:0005524	Interacting selectively and non-covalently with ATP, adenosine 5'-triphosphate, a universally important coenzyme and enzyme regulator.	MF	ATP binding
tig00001_1821	GO:0004798	Catalysis of the reaction: ATP + thymidine 5'-phosphate = ADP + thymidine 5'-diphosphate.	MF	thymidylate kinase activity
tig00001_1824	GO:0003677	Any molecular function by which a gene product interacts selectively and non-covalently with DNA (deoxyribonucleic acid).	MF	DNA binding
tig00001_1824	GO:0003887	Catalysis of the reaction: deoxynucleoside triphosphate + DNA(n) = diphosphate + DNA(n+1); the synthesis of DNA from deoxyribonucleotide triphosphates in the presence of a DNA template and a 3'hydroxyl group.	MF	DNA-directed DNA polymerase activity
tig00001_1824	GO:0005524	Interacting selectively and non-covalently with ATP, adenosine 5'-triphosphate, a universally important coenzyme and enzyme regulator.	MF	ATP binding
tig00001_1828	GO:0003677	Any molecular function by which a gene product interacts selectively and non-covalently with DNA (deoxyribonucleic acid).	MF	DNA binding
tig00001_1828	GO:0003700	A protein or a member of a complex that interacts selectively and non-covalently with a specific DNA sequence (sometimes referred to as a motif) within the regulatory region of a gene to modulate transcription. Regulatory regions include promoters (proximal and distal) and enhancers. Genes are transcriptional units, and include bacterial operons.	MF	DNA-binding transcription factor activity
tig00001_182	GO:0003724	Catalysis of the reaction: NTP + H2O = NDP + phosphate, to drive the unwinding of a RNA helix.	MF	RNA helicase activity
tig00001_182	GO:0004386	Catalysis of the reaction: NTP + H2O = NDP + phosphate, to drive the unwinding of a DNA or RNA helix.	MF	helicase activity
tig00001_182	GO:0003676	Interacting selectively and non-covalently with any nucleic acid.	MF	nucleic acid binding
tig00001_1830	GO:0022857	Enables the transfer of a substance, usually a specific substance or a group of related substances, from one side of a membrane to the other.	MF	transmembrane transporter activity
tig00001_1830	GO:0016021	The component of a membrane consisting of the gene products and protein complexes having at least some part of their peptide sequence embedded in the hydrophobic region of the membrane.	CC	integral component of membrane
tig00001_1832	GO:0003700	A protein or a member of a complex that interacts selectively and non-covalently with a specific DNA sequence (sometimes referred to as a motif) within the regulatory region of a gene to modulate transcription. Regulatory regions include promoters (proximal and distal) and enhancers. Genes are transcriptional units, and include bacterial operons.	MF	DNA-binding transcription factor activity
tig00001_1833	GO:0005975	The chemical reactions and pathways involving carbohydrates, any of a group of organic compounds based of the general formula Cx(H2O)y. Includes the formation of carbohydrate derivatives by the addition of a carbohydrate residue to another molecule.	BP	carbohydrate metabolic process
tig00001_1833	GO:0003824	Catalysis of a biochemical reaction at physiological temperatures. In biologically catalyzed reactions, the reactants are known as substrates, and the catalysts are naturally occurring macromolecular substances known as enzymes. Enzymes possess specific binding sites for substrates, and are usually composed wholly or largely of protein, but RNA that has catalytic activity (ribozyme) is often also…	MF	catalytic activity
tig00001_1834	GO:0008982	Catalysis of the PEP-dependent, phosphoryl transfer-driven transport of substances across a membrane. The transport happens by catalysis of the reaction: protein N-phosphohistidine + sugar(out) = protein histidine + sugar phosphate(in). This differs from primary and secondary active transport in that the solute is modified during transport.	MF	protein-N(PI)-phosphohistidine-sugar phosphotransferase activity
tig00001_1834	GO:0009401	The uptake and phosphorylation of specific carbohydrates from the extracellular environment; uptake and phosphorylation are coupled, making the PTS a link between the uptake and metabolism of sugars; phosphoenolpyruvate is the original phosphate donor; phosphoenolpyruvate passes the phosphate via a signal transduction pathway, to enzyme 1 (E1), which in turn passes it on to the histidine protein,…	BP	phosphoenolpyruvate-dependent sugar phosphotransferase system
tig00001_1834	GO:0005351	Enables the transfer of a solute or solutes from one side of a membrane to the other according to the reaction: sugar(out) + H+(out) = sugar(in) + H+(in).	MF	carbohydrate:proton symporter activity
tig00001_1835	GO:0008982	Catalysis of the PEP-dependent, phosphoryl transfer-driven transport of substances across a membrane. The transport happens by catalysis of the reaction: protein N-phosphohistidine + sugar(out) = protein histidine + sugar phosphate(in). This differs from primary and secondary active transport in that the solute is modified during transport.	MF	protein-N(PI)-phosphohistidine-sugar phosphotransferase activity
tig00001_1836	GO:0003735	The action of a molecule that contributes to the structural integrity of the ribosome.	MF	structural constituent of ribosome
tig00001_1837	GO:0003723	Interacting selectively and non-covalently with an RNA molecule or a portion thereof.	MF	RNA binding
tig00001_1837	GO:0003676	Interacting selectively and non-covalently with any nucleic acid.	MF	nucleic acid binding
tig00001_1837	GO:0006353	The cellular process that completes DNA-templated transcription; the formation of phosphodiester bonds ceases, the RNA-DNA hybrid dissociates, and RNA polymerase releases the DNA.	BP	DNA-templated transcription, termination
tig00001_1837	GO:0005524	Interacting selectively and non-covalently with ATP, adenosine 5'-triphosphate, a universally important coenzyme and enzyme regulator.	MF	ATP binding
tig00001_1838	GO:0008760	Catalysis of the reaction: phosphoenolpyruvate + UDP-N-acetyl-alpha-D-glucosamine = phosphate + UDP-N-acetyl-3-O-(1-carboxyvinyl)-D-glucosamine.	MF	UDP-N-acetylglucosamine 1-carboxyvinyltransferase activity
tig00001_1838	GO:0016765	Catalysis of the transfer of an alkyl or aryl (but not methyl) group from one compound (donor) to another (acceptor).	MF	transferase activity, transferring alkyl or aryl (other than methyl) groups
tig00001_1838	GO:0003824	Catalysis of a biochemical reaction at physiological temperatures. In biologically catalyzed reactions, the reactants are known as substrates, and the catalysts are naturally occurring macromolecular substances known as enzymes. Enzymes possess specific binding sites for substrates, and are usually composed wholly or largely of protein, but RNA that has catalytic activity (ribozyme) is often also…	MF	catalytic activity
tig00001_1839	GO:0005975	The chemical reactions and pathways involving carbohydrates, any of a group of organic compounds based of the general formula Cx(H2O)y. Includes the formation of carbohydrate derivatives by the addition of a carbohydrate residue to another molecule.	BP	carbohydrate metabolic process
tig00001_1839	GO:0003824	Catalysis of a biochemical reaction at physiological temperatures. In biologically catalyzed reactions, the reactants are known as substrates, and the catalysts are naturally occurring macromolecular substances known as enzymes. Enzymes possess specific binding sites for substrates, and are usually composed wholly or largely of protein, but RNA that has catalytic activity (ribozyme) is often also…	MF	catalytic activity
tig00001_1839	GO:0004332	Catalysis of the reaction: D-fructose 1,6-bisphosphate = glycerone phosphate + D-glyceraldehyde-3-phosphate.	MF	fructose-bisphosphate aldolase activity
tig00001_183	GO:0000287	Interacting selectively and non-covalently with magnesium (Mg) ions.	MF	magnesium ion binding
tig00001_1840	GO:0003883	Catalysis of the reaction: ATP + UTP + NH3 = ADP + phosphate + CTP.	MF	CTP synthase activity
tig00001_1842	GO:0004356	Catalysis of the reaction: L-glutamate + ATP + NH(3) = L-glutamine + ADP + 2 H(+) + phosphate.	MF	glutamate-ammonia ligase activity
tig00001_1842	GO:0003824	Catalysis of a biochemical reaction at physiological temperatures. In biologically catalyzed reactions, the reactants are known as substrates, and the catalysts are naturally occurring macromolecular substances known as enzymes. Enzymes possess specific binding sites for substrates, and are usually composed wholly or largely of protein, but RNA that has catalytic activity (ribozyme) is often also…	MF	catalytic activity
tig00001_1843	GO:0003677	Any molecular function by which a gene product interacts selectively and non-covalently with DNA (deoxyribonucleic acid).	MF	DNA binding
tig00001_1844	GO:0005525	Interacting selectively and non-covalently with GTP, guanosine triphosphate.	MF	GTP binding
tig00001_1846	GO:0006629	The chemical reactions and pathways involving lipids, compounds soluble in an organic solvent but not, or sparingly, in an aqueous solvent. Includes fatty acids; neutral fats, other fatty-acid esters, and soaps; long-chain (fatty) alcohols and waxes; sphingoids and other long-chain bases; glycolipids, phospholipids and sphingolipids; and carotenes, polyprenols, sterols, terpenes and other isopren…	BP	lipid metabolic process
tig00001_1848	GO:0004176	Catalysis of the reaction: ATP + H2O = ADP + phosphate, to drive the hydrolysis of peptide bonds.	MF	ATP-dependent peptidase activity
tig00001_184	GO:0003824	Catalysis of a biochemical reaction at physiological temperatures. In biologically catalyzed reactions, the reactants are known as substrates, and the catalysts are naturally occurring macromolecular substances known as enzymes. Enzymes possess specific binding sites for substrates, and are usually composed wholly or largely of protein, but RNA that has catalytic activity (ribozyme) is often also…	MF	catalytic activity
tig00001_184	GO:0006522	The chemical reactions and pathways involving alanine, 2-aminopropanoic acid.	BP	alanine metabolic process
tig00001_1851	GO:0005524	Interacting selectively and non-covalently with ATP, adenosine 5'-triphosphate, a universally important coenzyme and enzyme regulator.	MF	ATP binding
tig00001_1852	GO:0005524	Interacting selectively and non-covalently with ATP, adenosine 5'-triphosphate, a universally important coenzyme and enzyme regulator.	MF	ATP binding
tig00001_1854	GO:0003723	Interacting selectively and non-covalently with an RNA molecule or a portion thereof.	MF	RNA binding
tig00001_1854	GO:0004521	Catalysis of the hydrolysis of ester linkages within ribonucleic acid by creating internal breaks.	MF	endoribonuclease activity
tig00001_1855	GO:0003676	Interacting selectively and non-covalently with any nucleic acid.	MF	nucleic acid binding
tig00001_1857	GO:0016787	Catalysis of the hydrolysis of various bonds, e.g. C-O, C-N, C-C, phosphoric anhydride bonds, etc. Hydrolase is the systematic name for any enzyme of EC class 3.	MF	hydrolase activity
tig00001_1858	GO:0004326	Catalysis of the reaction: ATP + tetrahydrofolyl-(Glu)(n) + L-glutamate = ADP + phosphate + tetrahydrofolyl-(Glu)(n+1).	MF	tetrahydrofolylpolyglutamate synthase activity
tig00001_1858	GO:0005524	Interacting selectively and non-covalently with ATP, adenosine 5'-triphosphate, a universally important coenzyme and enzyme regulator.	MF	ATP binding
tig00001_1859	GO:0004812	Catalysis of the formation of aminoacyl-tRNA from ATP, amino acid, and tRNA with the release of diphosphate and AMP.	MF	aminoacyl-tRNA ligase activity
tig00001_1859	GO:0002161	The hydrolysis of an incorrectly aminoacylated tRNA.	MF	aminoacyl-tRNA editing activity
tig00001_1859	GO:0000166	Interacting selectively and non-covalently with a nucleotide, any compound consisting of a nucleoside that is esterified with (ortho)phosphate or an oligophosphate at any hydroxyl group on the ribose or deoxyribose.	MF	nucleotide binding
tig00001_185	GO:0003677	Any molecular function by which a gene product interacts selectively and non-covalently with DNA (deoxyribonucleic acid).	MF	DNA binding
tig00001_1860	GO:0045892	Any process that stops, prevents, or reduces the frequency, rate or extent of cellular DNA-templated transcription.	BP	negative regulation of transcription, DNA-templated
tig00001_1861	GO:0004810	Catalysis of the reaction: ATP + tRNA(n) = diphosphate + tRNA(n+1).	MF	tRNA adenylyltransferase activity
tig00001_1861	GO:0003723	Interacting selectively and non-covalently with an RNA molecule or a portion thereof.	MF	RNA binding
tig00001_1861	GO:0016783	Catalysis of the transfer of sulfur atoms from one compound (donor) to another (acceptor).	MF	sulfurtransferase activity
tig00001_1862	GO:0003824	Catalysis of a biochemical reaction at physiological temperatures. In biologically catalyzed reactions, the reactants are known as substrates, and the catalysts are naturally occurring macromolecular substances known as enzymes. Enzymes possess specific binding sites for substrates, and are usually composed wholly or largely of protein, but RNA that has catalytic activity (ribozyme) is often also…	MF	catalytic activity
tig00001_1863	GO:0000921	The aggregation, arrangement and bonding together of septins and associated proteins to form an organized structure resembling a ring at the cell cortex.	BP	septin ring assembly
tig00001_1865	GO:0016787	Catalysis of the hydrolysis of various bonds, e.g. C-O, C-N, C-C, phosphoric anhydride bonds, etc. Hydrolase is the systematic name for any enzyme of EC class 3.	MF	hydrolase activity
tig00001_1867	GO:0004067	Catalysis of the reaction: L-asparagine + H2O = L-aspartate + NH3.	MF	asparaginase activity
tig00001_1867	GO:0006520	The chemical reactions and pathways involving amino acids, carboxylic acids containing one or more amino groups, as carried out by individual cells.	BP	cellular amino acid metabolic process
tig00001_1868	GO:0006633	The chemical reactions and pathways resulting in the formation of a fatty acid, any of the aliphatic monocarboxylic acids that can be liberated by hydrolysis from naturally occurring fats and oils. Fatty acids are predominantly straight-chain acids of 4 to 24 carbon atoms, which may be saturated or unsaturated; branched fatty acids and hydroxy fatty acids also occur, and very long chain acids of …	BP	fatty acid biosynthetic process
tig00001_186	GO:0003735	The action of a molecule that contributes to the structural integrity of the ribosome.	MF	structural constituent of ribosome
tig00001_1870	GO:0006508	The hydrolysis of proteins into smaller polypeptides and/or amino acids by cleavage of their peptide bonds.	BP	proteolysis
tig00001_1874	GO:0004553	Catalysis of the hydrolysis of any O-glycosyl bond.	MF	hydrolase activity, hydrolyzing O-glycosyl compounds
tig00001_1875	GO:0008982	Catalysis of the PEP-dependent, phosphoryl transfer-driven transport of substances across a membrane. The transport happens by catalysis of the reaction: protein N-phosphohistidine + sugar(out) = protein histidine + sugar phosphate(in). This differs from primary and secondary active transport in that the solute is modified during transport.	MF	protein-N(PI)-phosphohistidine-sugar phosphotransferase activity
tig00001_1875	GO:0009401	The uptake and phosphorylation of specific carbohydrates from the extracellular environment; uptake and phosphorylation are coupled, making the PTS a link between the uptake and metabolism of sugars; phosphoenolpyruvate is the original phosphate donor; phosphoenolpyruvate passes the phosphate via a signal transduction pathway, to enzyme 1 (E1), which in turn passes it on to the histidine protein,…	BP	phosphoenolpyruvate-dependent sugar phosphotransferase system
tig00001_1875	GO:0005886	The membrane surrounding a cell that separates the cell from its external environment. It consists of a phospholipid bilayer and associated proteins.	CC	plasma membrane
tig00001_1876	GO:0006355	Any process that modulates the frequency, rate or extent of cellular DNA-templated transcription.	BP	regulation of transcription, DNA-templated
tig00001_1876	GO:0003723	Interacting selectively and non-covalently with an RNA molecule or a portion thereof.	MF	RNA binding
tig00001_1877	GO:0006281	The process of restoring DNA after damage. Genomes are subject to damage by chemical and physical agents in the environment (e.g. UV and ionizing radiations, chemical mutagens, fungal and bacterial toxins, etc.) and by free radicals or alkylating agents endogenously generated in metabolism. DNA is also damaged because of errors during its replication. A variety of different DNA repair pathways ha…	BP	DNA repair
tig00001_187	GO:0055114	A metabolic process that results in the removal or addition of one or more electrons to or from a substance, with or without the concomitant removal or addition of a proton or protons.	BP	oxidation-reduction process
tig00001_187	GO:0016491	Catalysis of an oxidation-reduction (redox) reaction, a reversible chemical reaction in which the oxidation state of an atom or atoms within a molecule is altered. One substrate acts as a hydrogen or electron donor and becomes oxidized, while the other acts as hydrogen or electron acceptor and becomes reduced.	MF	oxidoreductase activity
tig00001_1883	GO:0003677	Any molecular function by which a gene product interacts selectively and non-covalently with DNA (deoxyribonucleic acid).	MF	DNA binding
tig00001_1884	GO:0003677	Any molecular function by which a gene product interacts selectively and non-covalently with DNA (deoxyribonucleic acid).	MF	DNA binding
tig00001_1887	GO:0003700	A protein or a member of a complex that interacts selectively and non-covalently with a specific DNA sequence (sometimes referred to as a motif) within the regulatory region of a gene to modulate transcription. Regulatory regions include promoters (proximal and distal) and enhancers. Genes are transcriptional units, and include bacterial operons.	MF	DNA-binding transcription factor activity
tig00001_1887	GO:0097367	Interacting selectively and non-covalently with a carbohydrate derivative.	MF	carbohydrate derivative binding
tig00001_1888	GO:0009446	The chemical reactions and pathways resulting in the formation of putrescine, 1,4-diaminobutane; putrescine can be synthesized from arginine or ornithine and is the metabolic precursor of spermidine and spermine.	BP	putrescine biosynthetic process
tig00001_1888	GO:0004668	Catalysis of the reaction: protein L-arginine + H2O = protein L-citrulline + NH3.	MF	protein-arginine deiminase activity
tig00001_1889	GO:0006525	The chemical reactions and pathways involving arginine, 2-amino-5-(carbamimidamido)pentanoic acid.	BP	arginine metabolic process
tig00001_188	GO:0016020	A lipid bilayer along with all the proteins and protein complexes embedded in it an attached to it.	CC	membrane
tig00001_1890	GO:0009446	The chemical reactions and pathways resulting in the formation of putrescine, 1,4-diaminobutane; putrescine can be synthesized from arginine or ornithine and is the metabolic precursor of spermidine and spermine.	BP	putrescine biosynthetic process
tig00001_1890	GO:0004668	Catalysis of the reaction: protein L-arginine + H2O = protein L-citrulline + NH3.	MF	protein-arginine deiminase activity
tig00001_1891	GO:0016020	A lipid bilayer along with all the proteins and protein complexes embedded in it an attached to it.	CC	membrane
tig00001_1892	GO:0006520	The chemical reactions and pathways involving amino acids, carboxylic acids containing one or more amino groups, as carried out by individual cells.	BP	cellular amino acid metabolic process
tig00001_1892	GO:0016743	Catalysis of the transfer of a carboxyl- or carbamoyl group from one compound (donor) to another (acceptor).	MF	carboxyl- or carbamoyltransferase activity
tig00001_1892	GO:0033390	The chemical reactions and pathways resulting in the formation of putrescine, 1,4-diaminobutane, from other compounds, including arginine, via the intermediate N-carbamoylputrescine; in this pathway, arginine is converted to agmatine, and agmatine is converted to putrescine in two single enzymatic steps.	BP	putrescine biosynthetic process from arginine via N-carbamoylputrescine
tig00001_1896	GO:0003676	Interacting selectively and non-covalently with any nucleic acid.	MF	nucleic acid binding
tig00001_1897	GO:0009058	The chemical reactions and pathways resulting in the formation of substances; typically the energy-requiring part of metabolism in which simpler substances are transformed into more complex ones.	BP	biosynthetic process
tig00001_1897	GO:0003824	Catalysis of a biochemical reaction at physiological temperatures. In biologically catalyzed reactions, the reactants are known as substrates, and the catalysts are naturally occurring macromolecular substances known as enzymes. Enzymes possess specific binding sites for substrates, and are usually composed wholly or largely of protein, but RNA that has catalytic activity (ribozyme) is often also…	MF	catalytic activity
tig00001_1898	GO:0000413	The modification of a protein by cis-trans isomerization of a proline residue.	BP	protein peptidyl-prolyl isomerization
tig00001_1898	GO:0003755	Catalysis of the reaction: peptidyl-proline (omega=180) = peptidyl-proline (omega=0).	MF	peptidyl-prolyl cis-trans isomerase activity
tig00001_1899	GO:0004324	Catalysis of the reaction: reduced ferredoxin + NADP+ = oxidized ferredoxin + NADPH + H+.	MF	ferredoxin-NADP+ reductase activity
tig00001_1899	GO:0016491	Catalysis of an oxidation-reduction (redox) reaction, a reversible chemical reaction in which the oxidation state of an atom or atoms within a molecule is altered. One substrate acts as a hydrogen or electron donor and becomes oxidized, while the other acts as hydrogen or electron acceptor and becomes reduced.	MF	oxidoreductase activity
tig00001_189	GO:0016020	A lipid bilayer along with all the proteins and protein complexes embedded in it an attached to it.	CC	membrane
tig00001_18	GO:0000287	Interacting selectively and non-covalently with magnesium (Mg) ions.	MF	magnesium ion binding
tig00001_18	GO:0003824	Catalysis of a biochemical reaction at physiological temperatures. In biologically catalyzed reactions, the reactants are known as substrates, and the catalysts are naturally occurring macromolecular substances known as enzymes. Enzymes possess specific binding sites for substrates, and are usually composed wholly or largely of protein, but RNA that has catalytic activity (ribozyme) is often also…	MF	catalytic activity
tig00001_18	GO:0047112	Catalysis of the reaction: H(+) + O(2) + phosphate + pyruvate = acetyl phosphate + CO(2) + H(2)O(2).	MF	pyruvate oxidase activity
tig00001_18	GO:0030976	Interacting selectively and non-covalently with thiamine pyrophosphate, the diphosphoric ester of thiamine. Acts as a coenzyme of several (de)carboxylases, transketolases, and alpha-oxoacid dehydrogenases.	MF	thiamine pyrophosphate binding
tig00001_1900	GO:0006629	The chemical reactions and pathways involving lipids, compounds soluble in an organic solvent but not, or sparingly, in an aqueous solvent. Includes fatty acids; neutral fats, other fatty-acid esters, and soaps; long-chain (fatty) alcohols and waxes; sphingoids and other long-chain bases; glycolipids, phospholipids and sphingolipids; and carotenes, polyprenols, sterols, terpenes and other isopren…	BP	lipid metabolic process
tig00001_1904	GO:0009166	The chemical reactions and pathways resulting in the breakdown of nucleotides, any nucleoside that is esterified with (ortho)phosphate or an oligophosphate at any hydroxyl group on the glycose moiety; may be mono-, di- or triphosphate; this definition includes cyclic-nucleotides (nucleoside cyclic phosphates).	BP	nucleotide catabolic process
tig00001_1904	GO:0000166	Interacting selectively and non-covalently with a nucleotide, any compound consisting of a nucleoside that is esterified with (ortho)phosphate or an oligophosphate at any hydroxyl group on the ribose or deoxyribose.	MF	nucleotide binding
tig00001_1904	GO:0016787	Catalysis of the hydrolysis of various bonds, e.g. C-O, C-N, C-C, phosphoric anhydride bonds, etc. Hydrolase is the systematic name for any enzyme of EC class 3.	MF	hydrolase activity
tig00001_1906	GO:0002100	The process in which an adenosine in position 34 of a tRNA is post-transcriptionally converted to inosine.	BP	tRNA wobble adenosine to inosine editing
tig00001_1906	GO:0008270	Interacting selectively and non-covalently with zinc (Zn) ions.	MF	zinc ion binding
tig00001_1906	GO:0003824	Catalysis of a biochemical reaction at physiological temperatures. In biologically catalyzed reactions, the reactants are known as substrates, and the catalysts are naturally occurring macromolecular substances known as enzymes. Enzymes possess specific binding sites for substrates, and are usually composed wholly or largely of protein, but RNA that has catalytic activity (ribozyme) is often also…	MF	catalytic activity
tig00001_1909	GO:0008168	Catalysis of the transfer of a methyl group to an acceptor molecule.	MF	methyltransferase activity
tig00001_1909	GO:0001510	Posttranscriptional addition of a methyl group to either a nucleotide or 2'-O ribose in a polyribonucleotide. Usually uses S-adenosylmethionine as a cofactor.	BP	RNA methylation
tig00001_1909	GO:0003723	Interacting selectively and non-covalently with an RNA molecule or a portion thereof.	MF	RNA binding
tig00001_1914	GO:0003676	Interacting selectively and non-covalently with any nucleic acid.	MF	nucleic acid binding
tig00001_1915	GO:0003700	A protein or a member of a complex that interacts selectively and non-covalently with a specific DNA sequence (sometimes referred to as a motif) within the regulatory region of a gene to modulate transcription. Regulatory regions include promoters (proximal and distal) and enhancers. Genes are transcriptional units, and include bacterial operons.	MF	DNA-binding transcription factor activity
tig00001_1917	GO:0002161	The hydrolysis of an incorrectly aminoacylated tRNA.	MF	aminoacyl-tRNA editing activity
tig00001_1918	GO:0004521	Catalysis of the hydrolysis of ester linkages within ribonucleic acid by creating internal breaks.	MF	endoribonuclease activity
tig00001_1918	GO:0003723	Interacting selectively and non-covalently with an RNA molecule or a portion thereof.	MF	RNA binding
tig00001_1919	GO:0016020	A lipid bilayer along with all the proteins and protein complexes embedded in it an attached to it.	CC	membrane
tig00001_191	GO:0004519	Catalysis of the hydrolysis of ester linkages within nucleic acids by creating internal breaks.	MF	endonuclease activity
tig00001_1920	GO:0005524	Interacting selectively and non-covalently with ATP, adenosine 5'-triphosphate, a universally important coenzyme and enzyme regulator.	MF	ATP binding
tig00001_1922	GO:0016787	Catalysis of the hydrolysis of various bonds, e.g. C-O, C-N, C-C, phosphoric anhydride bonds, etc. Hydrolase is the systematic name for any enzyme of EC class 3.	MF	hydrolase activity
tig00001_1922	GO:0016810	Catalysis of the hydrolysis of any carbon-nitrogen bond, C-N, with the exception of peptide bonds.	MF	hydrolase activity, acting on carbon-nitrogen (but not peptide) bonds
tig00001_1922	GO:0008798	Catalysis of the cleavage of a beta-linked aspartic residue from the N-terminus of a polypeptide.	MF	beta-aspartyl-peptidase activity
tig00001_1923	GO:0016021	The component of a membrane consisting of the gene products and protein complexes having at least some part of their peptide sequence embedded in the hydrophobic region of the membrane.	CC	integral component of membrane
tig00001_1924	GO:0097367	Interacting selectively and non-covalently with a carbohydrate derivative.	MF	carbohydrate derivative binding
tig00001_1926	GO:0009058	The chemical reactions and pathways resulting in the formation of substances; typically the energy-requiring part of metabolism in which simpler substances are transformed into more complex ones.	BP	biosynthetic process
tig00001_1926	GO:0003983	Catalysis of the reaction: alpha-D-glucose 1-phosphate + UTP = diphosphate + UDP-D-glucose.	MF	UTP:glucose-1-phosphate uridylyltransferase activity
tig00001_1927	GO:0016491	Catalysis of an oxidation-reduction (redox) reaction, a reversible chemical reaction in which the oxidation state of an atom or atoms within a molecule is altered. One substrate acts as a hydrogen or electron donor and becomes oxidized, while the other acts as hydrogen or electron acceptor and becomes reduced.	MF	oxidoreductase activity
tig00001_1927	GO:0016616	Catalysis of an oxidation-reduction (redox) reaction in which a CH-OH group acts as a hydrogen or electron donor and reduces NAD+ or NADP.	MF	oxidoreductase activity, acting on the CH-OH group of donors, NAD or NADP as acceptor
tig00001_1927	GO:0004367	Catalysis of the reaction: sn-glycerol 3-phosphate + NAD+ = glycerone phosphate + NADH + H+.	MF	glycerol-3-phosphate dehydrogenase [NAD+] activity
tig00001_1927	GO:0055114	A metabolic process that results in the removal or addition of one or more electrons to or from a substance, with or without the concomitant removal or addition of a proton or protons.	BP	oxidation-reduction process
tig00001_1928	GO:0097367	Interacting selectively and non-covalently with a carbohydrate derivative.	MF	carbohydrate derivative binding
tig00001_1929	GO:0097367	Interacting selectively and non-covalently with a carbohydrate derivative.	MF	carbohydrate derivative binding
tig00001_1930	GO:0009401	The uptake and phosphorylation of specific carbohydrates from the extracellular environment; uptake and phosphorylation are coupled, making the PTS a link between the uptake and metabolism of sugars; phosphoenolpyruvate is the original phosphate donor; phosphoenolpyruvate passes the phosphate via a signal transduction pathway, to enzyme 1 (E1), which in turn passes it on to the histidine protein,…	BP	phosphoenolpyruvate-dependent sugar phosphotransferase system
tig00001_1931	GO:0009401	The uptake and phosphorylation of specific carbohydrates from the extracellular environment; uptake and phosphorylation are coupled, making the PTS a link between the uptake and metabolism of sugars; phosphoenolpyruvate is the original phosphate donor; phosphoenolpyruvate passes the phosphate via a signal transduction pathway, to enzyme 1 (E1), which in turn passes it on to the histidine protein,…	BP	phosphoenolpyruvate-dependent sugar phosphotransferase system
tig00001_1932	GO:0005737	All of the contents of a cell excluding the plasma membrane and nucleus, but including other subcellular structures.	CC	cytoplasm
tig00001_1933	GO:0009401	The uptake and phosphorylation of specific carbohydrates from the extracellular environment; uptake and phosphorylation are coupled, making the PTS a link between the uptake and metabolism of sugars; phosphoenolpyruvate is the original phosphate donor; phosphoenolpyruvate passes the phosphate via a signal transduction pathway, to enzyme 1 (E1), which in turn passes it on to the histidine protein,…	BP	phosphoenolpyruvate-dependent sugar phosphotransferase system
tig00001_1934	GO:0009401	The uptake and phosphorylation of specific carbohydrates from the extracellular environment; uptake and phosphorylation are coupled, making the PTS a link between the uptake and metabolism of sugars; phosphoenolpyruvate is the original phosphate donor; phosphoenolpyruvate passes the phosphate via a signal transduction pathway, to enzyme 1 (E1), which in turn passes it on to the histidine protein,…	BP	phosphoenolpyruvate-dependent sugar phosphotransferase system
tig00001_1934	GO:0006355	Any process that modulates the frequency, rate or extent of cellular DNA-templated transcription.	BP	regulation of transcription, DNA-templated
tig00001_1934	GO:0005524	Interacting selectively and non-covalently with ATP, adenosine 5'-triphosphate, a universally important coenzyme and enzyme regulator.	MF	ATP binding
tig00001_1936	GO:0005524	Interacting selectively and non-covalently with ATP, adenosine 5'-triphosphate, a universally important coenzyme and enzyme regulator.	MF	ATP binding
tig00001_1937	GO:0005524	Interacting selectively and non-covalently with ATP, adenosine 5'-triphosphate, a universally important coenzyme and enzyme regulator.	MF	ATP binding
tig00001_1938	GO:0022857	Enables the transfer of a substance, usually a specific substance or a group of related substances, from one side of a membrane to the other.	MF	transmembrane transporter activity
tig00001_1939	GO:0008929	Catalysis of the reaction: glycerone phosphate = methylglyoxal + phosphate.	MF	methylglyoxal synthase activity
tig00001_193	GO:0016020	A lipid bilayer along with all the proteins and protein complexes embedded in it an attached to it.	CC	membrane
tig00001_1940	GO:0005524	Interacting selectively and non-covalently with ATP, adenosine 5'-triphosphate, a universally important coenzyme and enzyme regulator.	MF	ATP binding
tig00001_1942	GO:0000179	Catalysis of the dimethylation two adjacent A residues in the loop closing the 3'-terminal stem of the 18S rRNA, using S-adenosyl-L-methionine as a methyl donor.	MF	rRNA (adenine-N6,N6-)-dimethyltransferase activity
tig00001_1942	GO:0000154	The covalent alteration of one or more nucleotides within an rRNA molecule to produce an rRNA molecule with a sequence that differs from that coded genetically.	BP	rRNA modification
tig00001_1943	GO:0043822	Catalysis of the endonucleolytic cleavage of RNA, removing 21 and 42 nucleotides, respectively, from the 5'- and 3'-termini of a 5S-rRNA precursor.	MF	ribonuclease M5 activity
tig00001_1944	GO:0016888	Catalysis of the hydrolysis of ester linkages within deoxyribonucleic acids by creating internal breaks to yield 5'-phosphomonoesters.	MF	endodeoxyribonuclease activity, producing 5'-phosphomonoesters
tig00001_1944	GO:0016788	Catalysis of the hydrolysis of any ester bond.	MF	hydrolase activity, acting on ester bonds
tig00001_1944	GO:0004536	Catalysis of the hydrolysis of ester linkages within deoxyribonucleic acid.	MF	deoxyribonuclease activity
tig00001_1945	GO:0016020	A lipid bilayer along with all the proteins and protein complexes embedded in it an attached to it.	CC	membrane
tig00001_1947	GO:0000166	Interacting selectively and non-covalently with a nucleotide, any compound consisting of a nucleoside that is esterified with (ortho)phosphate or an oligophosphate at any hydroxyl group on the ribose or deoxyribose.	MF	nucleotide binding
tig00001_1947	GO:0004825	Catalysis of the reaction: ATP + L-methionine + tRNA(Met) = AMP + diphosphate + L-methionyl-tRNA(Met).	MF	methionine-tRNA ligase activity
tig00001_1947	GO:0004812	Catalysis of the formation of aminoacyl-tRNA from ATP, amino acid, and tRNA with the release of diphosphate and AMP.	MF	aminoacyl-tRNA ligase activity
tig00001_1947	GO:0000049	Interacting selectively and non-covalently with transfer RNA.	MF	tRNA binding
tig00001_1949	GO:0016787	Catalysis of the hydrolysis of various bonds, e.g. C-O, C-N, C-C, phosphoric anhydride bonds, etc. Hydrolase is the systematic name for any enzyme of EC class 3.	MF	hydrolase activity
tig00001_194	GO:0022857	Enables the transfer of a substance, usually a specific substance or a group of related substances, from one side of a membrane to the other.	MF	transmembrane transporter activity
tig00001_1951	GO:0005524	Interacting selectively and non-covalently with ATP, adenosine 5'-triphosphate, a universally important coenzyme and enzyme regulator.	MF	ATP binding
tig00001_1952	GO:0005524	Interacting selectively and non-covalently with ATP, adenosine 5'-triphosphate, a universally important coenzyme and enzyme regulator.	MF	ATP binding
tig00001_1952	GO:0000166	Interacting selectively and non-covalently with a nucleotide, any compound consisting of a nucleoside that is esterified with (ortho)phosphate or an oligophosphate at any hydroxyl group on the ribose or deoxyribose.	MF	nucleotide binding
tig00001_1953	GO:0016020	A lipid bilayer along with all the proteins and protein complexes embedded in it an attached to it.	CC	membrane
tig00001_1954	GO:0016020	A lipid bilayer along with all the proteins and protein complexes embedded in it an attached to it.	CC	membrane
tig00001_1956	GO:0043190	A complex for the transport of metabolites into and out of the cell, typically comprised of four domains; two membrane-associated domains and two ATP-binding domains at the intracellular face of the membrane, that form a central pore through the plasma membrane. Each of the four core domains may be encoded as a separate polypeptide or the domains can be fused in any one of a number of ways into m…	CC	ATP-binding cassette (ABC) transporter complex
tig00001_1957	GO:0008080	Catalysis of the transfer of an acetyl group to a nitrogen atom on the acceptor molecule.	MF	N-acetyltransferase activity
tig00001_1958	GO:0016614	Catalysis of an oxidation-reduction (redox) reaction in which a CH-OH group act as a hydrogen or electron donor and reduces a hydrogen or electron acceptor.	MF	oxidoreductase activity, acting on CH-OH group of donors
tig00001_1958	GO:0016491	Catalysis of an oxidation-reduction (redox) reaction, a reversible chemical reaction in which the oxidation state of an atom or atoms within a molecule is altered. One substrate acts as a hydrogen or electron donor and becomes oxidized, while the other acts as hydrogen or electron acceptor and becomes reduced.	MF	oxidoreductase activity
tig00001_1959	GO:0006364	Any process involved in the conversion of a primary ribosomal RNA (rRNA) transcript into one or more mature rRNA molecules.	BP	rRNA processing
tig00001_1959	GO:0003824	Catalysis of a biochemical reaction at physiological temperatures. In biologically catalyzed reactions, the reactants are known as substrates, and the catalysts are naturally occurring macromolecular substances known as enzymes. Enzymes possess specific binding sites for substrates, and are usually composed wholly or largely of protein, but RNA that has catalytic activity (ribozyme) is often also…	MF	catalytic activity
tig00001_1959	GO:0030488	The posttranscriptional addition of methyl groups to specific residues in a tRNA molecule.	BP	tRNA methylation
[truncated: 3,497 more rows]

## Sheet: H7_KEGG
Query_id	KO
tig00001_1	K02313
tig00001_2	K02338
[truncated: 2,507 more rows]
