# Supplementary material for: Enterococcus faecium Regulates Honey Bee Developmental Genes
Source: Int J Mol Sci. 2021 Nov 9;22(22):12105. doi: 10.3390/ijms222212105 (PMC8621553; doi:10.3390/ijms222212105)
Supplement: Supplementary file 1 [file ijms-22-12105-s001.zip › TableS3_bactericin.xlsx]

## Sheet: Sheet2
Bacteriocin
strain	gene	contig	start	end	score
E.faecium H7	Enterocin_A	chromosome	2133417	2153609	81.2
	Enterocin_B	chromosome	1943801	1965280	82.2
