# Supplementary material for: Enterococcus faecium Regulates Honey Bee Developmental Genes
Source: Int J Mol Sci. 2021 Nov 9;22(22):12105. doi: 10.3390/ijms222212105 (PMC8621553; doi:10.3390/ijms222212105)
Supplement: Supplementary file 1 [file ijms-22-12105-s001.zip › TableS4_RNA-Seq_statistic.xlsx]

## Sheet: clean_data
	data_QC									Hisat2_statistic
Sample	Raw Reads	Clean Reads	Raw Base(G)	Clean Base(G)	Effective Rate(%)	Error Rate(%)	Q20(%)	Q30(%)	GC Content(%)	Total_reads	paired	paired_rate	alin_0times	0time_rate	alin_1time	1time_rate	alin_>1times	>1times_rate	overall_align_rate
En1	29663900	28868157	8.9	8.66	97.32	0.03	97.6	93.34	38.52	26666084	26666084	1	1445737	0.0542	24764158	0.9287	456189	0.0171	0.9458
En2	25581144	24913499	7.67	7.47	97.39	0.03	97.63	93.41	39.11	23045876	23045876	1	1218755	0.0529	21443097	0.9305	384024	0.0167	0.9471
En3	25054189	24323925	7.52	7.3	97.09	0.03	97.62	93.4	40.43	22579926	22579926	1	1117640	0.0495	21140793	0.9363	321493	0.0142	0.9505
MF1	23344933	22740558	7	6.82	97.41	0.03	97.56	93.28	39.95	20972695	20972695	1	1063321	0.0507	19534738	0.9314	374636	0.0179	0.9493
MF2	24007650	23215484	7.2	6.96	96.7	0.03	97.58	93.31	39.21	21590230	21590230	1	1067654	0.0495	20201490	0.9357	321086	0.0149	0.9505
MF3	22650734	22037852	6.8	6.61	97.29	0.03	97.54	93.13	38.15	20333310	20333310	1	1029302	0.0506	18957222	0.9323	346786	0.0171	0.9494
