# Supplementary material for: Enterococcus faecium Regulates Honey Bee Developmental Genes
Source: Int J Mol Sci. 2021 Nov 9;22(22):12105. doi: 10.3390/ijms222212105 (PMC8621553; doi:10.3390/ijms222212105)
Supplement: Supplementary file 1 [file ijms-22-12105-s001.zip › TableS5_DEgenes_in_pathway.xlsx]

## Sheet: En-GF_DEgenes_in_pathlist
path_desc	pathway	gene_symbol	gene_desc	gene_id	baseMean	log2FoldChange	lfcSE	stat	pvalue	padj	En1_normalized_read_count	En2_normalized_read_count	En3_normalized_read_count	MF1_normalized_read_count	MF2_normalized_read_count	MF3_normalized_read_count	En1_fpkm	En2_fpkm	En3_fpkm	MF1_fpkm	MF2_fpkm	MF3_fpkm
Organismal Systems	ame04320	LOC726681	formin-2	726681	1946.03	2.92986	0.82632	3.54567	0.000391614	0.0143518	1114.28	6636.11	2571.47	171.62	558.455	624.254	3.57405	19.7037	7.01504	0.5033	1.63092	1.95038
Organismal Systems	ame04745	LOC409020	inaD-like protein	409020	33350.7	0.462297	0.140639	3.28711	0.00101221	0.0279599	38631.8	43956.4	33357.6	28898.6	29184.1	26075.6	40.5933	44.5184	32.1053	26.4466	27.4394	26.7512
Metabolism|Organismal Systems	ame00230|ame01100|ame04213	LOC551461	adenylate cyclase type 2	551461	16999.3	0.422344	0.118459	3.56531	0.000363432	0.0136915	18145.9	18562.8	21701.7	15204.1	14520.9	13860.3	59.7396	58.5225	64.3161	44.1325	43.3391	45.6912
Metabolism|Environmental Information Processing	ame00010|ame00020|ame00620|ame01100|ame04068	LOC412843	phosphoenolpyruvate carboxykinase	412843	2739.02	1.81647	0.464474	3.91081	9.2e-05	0.00549014	1789.5	7791.63	3219.14	833.581	1441.42	1358.85	7.00226	29.4242	12.5326	2.89901	5.72581	5.61778
Metabolism|Cellular Processes	ame00630|ame01100|ame01200|ame04146	LOC552771	hydroxyacid oxidase 1	552771	7180.73	3.45816	0.99933	3.46048	0.000539212	0.0181432	2975.79	24739	11776.5	310.55	1618.23	1664.34	29.6519	224.292	92.1057	2.92119	14.4068	15.9481
Metabolism|Cellular Processes	ame00190|ame01100|ame04142|ame04145	LOC412810	V-type proton ATPase 116 kDa subunit a	412810	10253.7	2.11583	0.641383	3.29886	0.000970799	0.0271191	6798.7	31101.3	12089.1	3542.13	3949.07	4041.82	31.8247	147.234	50.982	15.0451	15.1366	17.5449
Metabolism|Cellular Processes	ame00040|ame00053|ame00531|ame00860|ame00983|ame01100|ame01240|ame04142	LOC409814	beta-glucuronidase	409814	11090.8	1.28916	0.155062	8.31385	9.26e-17	1.55e-13	15083.4	16699.7	15439.5	5427.61	7567.17	6327.34	90.2775	96.6386	82.4578	27.9455	41.2789	37.5101
Metabolism	ame00670	LOC551401	cytosolic 10-formyltetrahydrofolate dehydrogenase	551401	8520.11	3.37176	1.04754	3.21874	0.00128754	0.0330263	4136.52	33858.4	8622.43	262.683	1983.7	2256.92	22.465	171.925	42.0364	1.18525	9.70631	12.1641
Metabolism	ame00330|ame01100|ame01230	LOC412948	delta-1-pyrroline-5-carboxylate synthase	412948	7963.8	3.35506	0.950236	3.53076	0.00041436	0.0149124	4793.16	27387.1	11348.6	339.737	2071.03	1843.13	19.274	107.509	41.6479	0.78422	7.37146	5.8614
Metabolism	ame00051|ame01100	LOC411307	mitochondrial enolase superfamily member 1	411307	1105.31	2.91071	0.55782	5.21801	1.81e-07	4.22e-05	713.941	3743.11	1396.7	137.763	268.446	371.896	7.04537	37.1475	13.5418	0.971568	2.26312	3.74916
Metabolism	ame00130|ame01100	LOC726362	4-coumarate--CoA ligase 1	726362	2682.78	2.84661	0.83516	3.40846	0.0006533	0.0211791	1463.5	6162.17	6506.57	274.358	433.395	1256.68	13.5966	53.668	53.9241	2.11169	3.84447	11.3059
Metabolism	ame00601|ame00603|ame01100	LOC107965795	lactosylceramide 4-alpha-galactosyltransferase	107965795	58.4056	2.37843	0.714309	3.3297	0.0008694	0.0252865	50.3321	172.258	71.489	8.17236	22.6401	25.5423	0.351374	0.959309	0.326929	0	0.19544	0.16857
Metabolism	ame00071|ame00310|ame00380|ame01100	LOC410254	glutaryl-CoA dehydrogenase, mitochondrial	410254	557.505	1.95853	0.534143	3.66667	0.000245733	0.0106665	315.156	1518.66	826.926	136.595	313.727	233.968	2.69053	13.2874	5.52034	0.357371	1.97742	1.72377
Metabolism	ame00310|ame01100	LOC725458	hydroxylysine kinase	725458	1137.36	1.88738	0.484716	3.89378	9.87e-05	0.00578708	854.871	3108.09	1409.51	255.678	559.533	636.514	10.4133	34.8696	15.3474	2.48041	6.32112	7.31659
Metabolism	ame00230|ame00760|ame01100	LOC107964838	probable uridine nucleosidase 2	107964838	1502.17	1.46997	0.468295	3.13899	0.0016953	0.0394404	1037.62	3476.81	2108.39	387.603	1056.54	946.087	13.5285	45.397	27.1729	4.1513	12.732	11.8907
Metabolism	ame00190|ame01100	LOC725527	cytochrome b-c1 complex subunit Rieske, mitochondrial	725527	5798.36	1.43288	0.390246	3.67174	0.000240904	0.0105482	4338.63	14829	6219.55	2884.84	3275.26	3242.85	2.83714	2.1422	2.30857	2.4853	3.50037	2.39593
Metabolism	ame00500|ame01100	LOC408867	alpha,alpha-trehalose-phosphate synthase [UDP-forming]	408867	7287.63	1.40399	0.36562	3.84004	0.000123015	0.00689089	5025.47	16343.1	10365.9	3294.63	4590.54	4106.18	10.929	37.533	23.0153	5.93126	8.33198	7.64163
Metabolism	ame01040|ame01100|ame01212	LOC727166	acyl-CoA Delta(11) desaturase	727166	16383.7	1.07502	0.281694	3.81627	0.000135486	0.0072005	20718.2	23879.6	22062.4	15784.3	8693.78	7164.11	52.3539	53.0831	42.0354	39.618	22.3597	24.0857
Metabolism	ame00020|ame00270|ame00620|ame00630|ame01100|ame01200	LOC100576801	malate dehydrogenase, cytoplasmic	100576801	5745.72	0.954677	0.295921	3.22612	0.00125479	0.0325953	4652.23	11259.1	6829.87	3921.57	3683.86	4127.64	1.30287	0.925013	0.907595	1.18777	0.658057	0.626026
Metabolism	ame00051|ame01100	LOC409963	6-phosphofructo-2-kinase/fructose-2,6-bisphosphatase	409963	36936	0.894991	0.291745	3.06772	0.002157	0.0464126	27173.1	67764.3	49180.2	25634.4	26052.2	25812	112.79	254.645	180.593	93.8434	103.195	111.165
Metabolism	ame00230|ame01100	LOC100577138	dual 3',5'-cyclic-AMP and -GMP phosphodiesterase 11	100577138	8574.95	0.735346	0.171289	4.29301	1.76e-05	0.00157096	9461.66	9974.18	12708	5524.52	6790.94	6990.42	24.7041	23.8039	29.5006	12.6184	16.2316	17.8679
Metabolism	ame00564|ame01100	LOC411525	choline/ethanolamine kinase	411525	33748.4	0.487055	0.120336	4.04747	5.18e-05	0.00350772	36699.1	41345.5	40129.9	30877.5	27934.6	25503.5	203.575	217.207	190.093	151.321	146.137	144.835
Metabolism	ame00512|ame00514|ame01100	LOC413987	polypeptide N-acetylgalactosaminyltransferase 5	413987	8185.77	0.295529	0.0905065	3.26528	0.00109357	0.0291628	8815.86	8814	9434.42	7572.28	7101.43	7376.62	35.5752	33.5276	34.0563	25.9482	26.5407	28.6645
Genetic Information Processing|Organismal Systems	ame04141|ame04213	LOC410857	protein lethal(2)essential for life	410857	158335	0.866889	0.198624	4.36448	1.27e-05	0.00124047	204516	248627	160428	93908.6	123264	119265	1264.39	1655.47	767.754	741.191	796.786	974.648
Genetic Information Processing	ame03008	LOC550808	WD repeat-containing protein 75	550808	5368.97	1.58799	0.416034	3.81698	0.000135094	0.0072005	3333.53	12354.1	8485.86	2034.92	2380.44	3624.97	6.76541	5.86062	7.03998	6.59202	6.34474	6.33269
Genetic Information Processing	ame03013	LOC411735	nuclear pore complex protein Nup133	411735	3405.61	1.08006	0.301254	3.58522	0.000336798	0.0132434	2861.19	6749.7	4261.6	1970.71	2050.54	2539.93	6.28871	5.44082	5.76327	5.93491	5.24117	6.46102
Genetic Information Processing	ame03440|ame03460|ame04120	LOC100576640	uncharacterized LOC100576640	100576640	1079.95	0.522923	0.143965	3.63229	0.000280919	0.0118506	1286.95	1346.4	1186.5	974.846	863.557	821.441	2.36321	2.48314	2.12609	1.46099	1.40667	1.50416
Environmental Information Processing|Organismal Systems	ame04013|ame04320	LOC412916	ETS-like protein pointed	412916	5512.98	0.420679	0.110597	3.80369	0.000142554	0.00740618	6089.41	6071.85	6772.25	4997.98	4710.21	4436.19	6.90183	7.83865	5.81293	4.9119	3.71722	4.47073
Environmental Information Processing|Cellular Processes	ame04013|ame04145|ame04310	LOC552138	Mig-2-like GTPase Mtl	552138	403.216	0.6028	0.169555	3.55519	0.000377712	0.0139753	475.445	515.842	467.346	333.899	301.867	324.898	6.80663	7.11798	6.43986	4.09767	3.25433	3.91628
Environmental Information Processing	ame04310	LOC107963993	palmitoleoyl-protein carboxylesterase NOTUM	107963993	58.5007	5.0062	0.985798	5.07832	3.81e-07	7.2e-05	48.0091	225.332	67.221	0	4.31239	6.13016	0.17122	0.816727	0.259452	0	0.0135326	0.0139875
Environmental Information Processing	ame04350	LOC100578446	pituitary homeobox x	100578446	1026.32	3.53719	1.1008	3.2133	0.00131219	0.0334033	747.238	3572.72	1349.76	21.0146	142.309	324.898	1.6088	8.48489	2.39166	0.0152824	0.153798	0.610193
Environmental Information Processing	ame04080	LOC726393	capa receptor-like GPCR	726393	1632.67	3.5354	0.957858	3.69095	0.000223421	0.00995726	780.535	5077.41	3160.46	64.2114	337.445	375.983	4.70718	26.9432	18.7131	0.455405	1.81813	2.26938
Environmental Information Processing	ame04080	LOC413829	diuretic hormone receptor	413829	1153.14	3.21673	0.532367	6.04231	1.52e-09	8.07e-07	788.278	4042.93	1415.91	154.107	206.995	310.595	1.80701	9.93011	3.17173	0.281345	0.466012	0.725235
Environmental Information Processing	ame04512	LOC410509	mucin-2	410509	104.76	3.1537	0.614427	5.13275	2.86e-07	5.96e-05	76.6596	214.158	274.219	29.187	11.8591	22.4772	0.125595	0.302465	0.386845	0.0476481	0.0198576	0.0478689
Environmental Information Processing	ame04512	LOC726871	synaptic vesicle glycoprotein 2B	726871	23855.3	3.0783	0.834016	3.69093	0.000223435	0.00995726	10010.7	65475.6	52493.2	2310.44	5800.17	7041.51	61.5444	421.936	311.041	11.6886	31.2416	41.3551
Environmental Information Processing	ame04013|ame04391	LOC113218545	ras-interacting protein RIP3-like	113218545	20.8332	2.50736	0.825668	3.03677	0.00239129	0.0495402	17.0355	46.5561	42.68	8.17236	6.46859	4.08677	0.0644163	0.173809	0.150698	0.0279348	0.0271531	0.014033
Environmental Information Processing	ame04150	LOC411935	large neutral amino acids transporter small subunit 2	411935	704.459	1.14137	0.370059	3.0843	0.00204032	0.0448628	541.264	1319.4	1047.79	447.145	559.533	311.616	3.94978	9.28413	6.91384	2.77706	3.52721	1.87816
Environmental Information Processing	ame04350	LOC412471	activin receptor type-2A	412471	242.949	0.974515	0.293676	3.31834	0.000905551	0.0257953	243.143	344.515	378.785	171.62	133.684	185.948	1.77772	2.62192	2.59828	1.18779	0.823906	1.21388
Environmental Information Processing	ame04080	SIFR	SIFamide receptor	413211	609.223	0.934982	0.291975	3.20226	0.00136352	0.0341385	741.043	1075.45	583.649	359.584	382.725	512.89	3.45306	5.73658	2.84627	1.94004	3.13464	2.17461
Environmental Information Processing	ame04391|ame04392	LOC408767	protein dachsous	408767	1515.6	0.702347	0.14591	4.81356	1.48e-06	0.000215453	1755.43	1951.63	1925.94	1019.21	1280.78	1160.64	2.64555	2.76914	2.60133	1.35128	1.77259	1.76268
Environmental Information Processing	ame04150|ame04310	LOC552374	protein Wnt-1	552374	1423.98	0.640851	0.150891	4.24712	2.17e-05	0.00187175	1926.56	1751.44	1526.88	1036.72	1179.44	1122.84	1.92693	1.67334	1.84629	1.02074	1.37893	0.953399
Environmental Information Processing	ame04391|ame04392	LOC413440	protein kibra	413440	5680.2	0.510099	0.133805	3.81224	0.000137712	0.00722931	5789.74	6961.07	7272.68	4538	4561.43	4958.27	8.12138	9.25223	8.61681	5.63519	4.88054	6.58107
Environmental Information Processing	ame04310	LOC408311	catenin delta-2	408311	12959.6	0.425189	0.111341	3.8188	0.000134101	0.0072005	13331	15579.5	15657.2	11124.9	11312.5	10752.3	28.841	31.9761	26.8489	18.2281	19.134	20.4571
Environmental Information Processing	ame04013	LOC413946	myocyte-specific enhancer factor 2	413946	5766.65	0.385766	0.108228	3.56439	0.00036471	0.0136915	6143.61	7046.73	6409.47	4937.27	4826.64	5236.17	6.7231	8.57868	7.37742	4.41113	3.39254	4.62467
Cellular Processes|Organismal Systems	ame04214|ame04320	Br-c	broad-complex	552255	197.827	1.30161	0.320162	4.06549	4.79e-05	0.00336097	209.072	340.791	294.492	138.93	104.576	99.1042	0.658129	0.987383	0.787104	0.396556	0.319437	0.313763
Cellular Processes|Environmental Information Processing|Organismal Systems	ame04136|ame04140|ame04150|ame04213	LOC551668	regulatory-associated protein of mTOR	551668	1903.31	0.666137	0.169097	3.93938	8.17e-05	0.00499464	1984.63	2326.87	2694.18	1609.96	1458.67	1345.57	6.17817	6.77188	7.59627	4.27253	4.06352	4.05018
Cellular Processes	ame04214|ame04215	LOC100576484	caspase-1	100576484	161.137	2.7876	0.895124	3.11421	0.0018444	0.0421272	102.987	598.711	142.978	4.66992	58.2173	59.2582	1.37456	7.93403	1.99374	0.0880605	0.892265	0.833608
Cellular Processes	ame04142	LOC412884	AP-1 complex subunit gamma-1	412884	4591.38	0.491184	0.146933	3.34292	0.000829019	0.0246664	4782.32	5410.75	5903.71	4308	3609.47	3534.03	15.7731	17.9125	17.5946	11.7428	11.0559	11.24
Cellular Processes	ame04144	LOC413200	fibroblast growth factor receptor homolog 1	413200	8846.26	0.422504	0.10294	4.10436	4.05e-05	0.00296387	10105.9	10040.3	10250.7	8140.84	6993.62	7546.22	14.2909	16.0705	17.1749	8.77721	6.21562	7.05834
Organismal Systems	ame04624	Imd	immune deficiency	100302584	3857.62	-0.495004	0.115257	-4.29478	1.75e-05	0.00157096	3517.83	3107.15	2980.13	4540.33	4612.1	4388.17	52.2254	42.7766	38.5565	58.1601	59.5354	63.9137
Organismal Systems	ame04624	Def1	defensin 1	406143	11853.7	-2.86145	0.681519	-4.19863	2.69e-05	0.00222527	3095.04	3783.15	1724.27	30632.3	25271.7	6615.46	109.578	129.552	57.1842	932.85	804.201	231.085
Organismal Systems	ame04624	Def2	defensin 2	413397	114.246	-3.31992	1.02238	-3.24724	0.00116529	0.0308296	6.96906	36.3138	19.206	414.455	197.292	11.2386	0.119161	1.11154	0	11.2015	2.84893	0.156502
Organismal Systems	ame04624	LOC725832	beta-1,3-glucan-binding protein 1	725832	759.136	-3.46267	1.00663	-3.43985	0.000582027	0.0193887	89.8234	243.023	45.881	1867.97	2052.7	255.423	1.13367	2.40113	0.498337	18.5124	21.2578	2.62743
Metabolism	ame00071|ame01100|ame01212	LOC412025	very long-chain specific acyl-CoA dehydrogenase, mitochondrial	412025	8471.39	-0.267374	0.080762	-3.31064	0.000930838	0.0262916	7676.03	7748.8	7640.79	9488.11	8994.57	9280.03	58.1437	57.2556	53.6285	64.4857	65.6093	70.9366
Metabolism	ame00260|ame00270|ame00750|ame01100|ame01200|ame01230|ame01240	LOC412670	probable phosphoserine aminotransferase	412670	3429.61	-0.329038	0.0983451	-3.34575	0.000820607	0.0245619	3182.54	3047.56	2889.44	3756.95	3918.89	3782.31	35.3038	32.3717	29.7193	34.8444	40.2428	41.3948
Metabolism	ame00450	Trxr-1	thioredoxin reductase 1	410032	20070.4	-0.346764	0.0830094	-4.1774	2.95e-05	0.0023098	18173	17385.9	17449.7	23273.7	21787.3	22352.6	149.188	135.327	127.557	162.777	163.137	179.485
Metabolism	ame00270|ame00480|ame01100|ame01240	LOC100578132	glutamate--cysteine ligase catalytic subunit	100578132	3307.98	-0.355716	0.115712	-3.07416	0.00211096	0.0456177	3016.05	2952.59	2736.86	4003.29	3466.09	3672.98	20.844	20.0576	17.484	24.749	23.1863	26.7457
Metabolism	ame00230|ame00670|ame01100	LOC412467	bifunctional purine biosynthesis protein PURH	412467	3005.3	-0.473487	0.149486	-3.16742	0.00153796	0.036671	2773.69	2453.51	2321.79	3202.4	3296.82	3983.58	22.2945	18.7655	17.4507	22.6052	24.7632	31.8483
Metabolism	ame00010|ame00562|ame01100	LOC100577002	multiple inositol polyphosphate phosphatase 1	100577002	18026.1	-0.631883	0.175642	-3.59756	0.000321219	0.0127812	15950.6	13620.5	12848.8	26694.4	19534.1	19508.2	93.6353	76.0535	67.2589	131.853	103.882	110.515
Metabolism	ame00350|ame01100	LOC551465	homogentisate 1,2-dioxygenase	551465	5328.51	-0.808549	0.204263	-3.95838	7.55e-05	0.00478891	3575.9	4639.78	3403.73	7149.65	7883.05	5318.93	9.96671	16.1412	6.64907	27.8051	38.3833	20.8535
Metabolism	ame00010|ame00040|ame00053|ame00561|ame00620|ame01100|ame01240	LOC411202	1,5-anhydro-D-fructose reductase	411202	793.507	-0.846996	0.255393	-3.31645	0.000911701	0.025897	611.729	537.257	551.639	1243.37	1122.3	694.751	9.37896	7.97759	7.59951	16.7216	15.352	10.4839
Metabolism	ame00532	LOC413914	carbohydrate sulfotransferase 11	413914	2213.31	-1.07999	0.217064	-4.97547	6.51e-07	0.000114503	1444.92	1631.33	1187.57	3301.63	3438.05	2276.33	13.2211	14.31	9.73927	26.8986	29.5906	21.4163
Metabolism	ame00480|ame01100	LOC409077	aminopeptidase N	409077	67.0364	-1.18113	0.368734	-3.20319	0.00135913	0.0341385	41.8144	42.8316	38.412	81.7236	102.419	95.0174	0.162819	0.188339	0.189047	0.327409	0.430433	0.464417
Metabolism	ame00260|ame01100	LOC552832	glycine N-methyltransferase	552832	150.649	-1.61648	0.530431	-3.04749	0.00230763	0.0484071	74.3366	91.25	56.551	215.984	368.71	97.0608	1.00168	1.35457	0.804303	2.66333	4.95421	1.52959
Metabolism	ame00520|ame01100	LOC412215	chitin synthase chs-2	412215	204.447	-2.37545	0.701079	-3.38827	0.000703342	0.0221079	68.9163	72.6275	56.551	560.39	415.068	53.128	0.129155	0.17483	0.118121	1.22087	1.04155	0.135626
Metabolism	ame00350|ame00790|ame01100	TyHyd	tyrosine hydroxylase	408930	217.593	-3.55732	0.751191	-4.73557	2.18e-06	0.000295985	27.8762	30.727	43.747	528.868	625.297	49.0412	0.153874	0.125359	0.278925	2.16804	2.63789	0.364272
Genetic Information Processing	ame03050	LOC408986	proteasome subunit alpha type-3	408986	12721.5	-0.314985	0.0956534	-3.29298	0.000991323	0.0274586	11931	11542.2	10539.8	14279.4	13962.4	14073.8	223.092	208.371	178.711	232.506	237.87	262.724
Genetic Information Processing	ame03040	LOC409671	beta-catenin-like protein 1	409671	2591.13	-0.316986	0.0991463	-3.19716	0.00138789	0.034532	2251.78	2241.21	2430.63	2887.18	2893.62	2842.35	15.6338	14.4378	15.4662	16.9603	18.4733	19.4846
Genetic Information Processing	ame04120|ame04141	LOC100576667	E3 ubiquitin-protein ligase synoviolin A	100576667	9503.48	-0.339309	0.0897583	-3.78025	0.000156668	0.00793746	8153.8	8416.41	8603.23	11141.3	10281.8	10424.3	48.7323	48.3701	47.041	58.3912	56.7188	61.7337
Genetic Information Processing	ame03015	LOC411465	probable cleavage and polyadenylation specificity factor subunit 2	411465	3702.54	-0.353626	0.102155	-3.46167	0.000536836	0.0181432	3380.77	3187.23	3183.93	4396.73	4106.48	3960.08	19.2062	18.0034	15.9763	22.5705	22.1671	23.7204
Genetic Information Processing	ame03050	LOC409168	26S proteasome non-ATPase regulatory subunit 13	409168	7728.13	-0.375037	0.108608	-3.45312	0.000554138	0.0185831	7255.56	6280.42	6650.62	9169.39	8388.68	8624.11	95.5879	80.1946	81.4758	106.55	101.837	113.737
Genetic Information Processing	ame03050	LOC551128	26S proteasome regulatory subunit 4	551128	13899.3	-0.391238	0.11393	-3.43402	0.000594696	0.0197451	13238.1	11906.3	10932.5	15766.8	15358.6	16193.8	123.977	107.356	93.9474	127.811	131.786	148.898
Genetic Information Processing	ame03013	LOC410447	importin subunit beta-1	410447	10222.1	-0.397071	0.125991	-3.15158	0.0016239	0.038044	9161.99	8469.49	8840.1	12998.7	11499	10363	4.579	5.47221	5.54749	2.84627	3.33307	3.20036
Genetic Information Processing	ame03050	LOC410072	26S proteasome non-ATPase regulatory subunit 14	410072	7007.64	-0.401224	0.129558	-3.09686	0.00195585	0.0437752	6663.19	6227.34	5226.17	7924.85	8015.66	7988.61	106.458	95.1823	76.8	108.855	116.675	127.369
Genetic Information Processing	ame03060	LOC726435	signal recognition particle subunit SRP72	726435	4266.63	-0.41499	0.118383	-3.50549	0.000455771	0.0160428	3621.59	3432.12	3918.03	5268.84	4774.9	4584.33	17.7137	16.2336	17.0748	21.737	21.1076	22.2016
Genetic Information Processing	ame03050	LOC410095	proteasome subunit alpha type-7-1	410095	9957.22	-0.419893	0.129245	-3.24881	0.00115888	0.0307409	9518.19	8589.6	7445.53	11637.4	11027.9	11524.7	179.293	156.37	128.543	191.46	191.401	217.868
Genetic Information Processing	ame03008	LOC411233	U3 small nucleolar ribonucleoprotein protein MPP10	411233	1720.21	-0.457393	0.14581	-3.13692	0.00170732	0.0396281	1581.2	1282.16	1485.26	2150.5	1971.84	1850.29	9.56873	7.21419	8.52797	10.7406	10.4119	10.6373
Genetic Information Processing	ame03013|ame03015	LOC552567	DEAD-box helicase Dbp80	552567	2801.69	-0.506449	0.144547	-3.50369	0.000458851	0.016087	2414.39	2516.82	2012.36	3567.82	3066.11	3232.64	18.9468	18.9571	13.9568	24.224	21.9183	24.9663
Genetic Information Processing	ame03030|ame03420|ame03430	LOC551540	replication factor C subunit 2	551540	607.237	-0.572876	0.141511	-4.04829	5.16e-05	0.00350772	487.06	504.668	472.681	758.862	702.92	717.228	7.17839	7.04827	5.85948	10.2284	9.75771	10.667
Genetic Information Processing	ame04141	LOC412150	endoplasmin	412150	14659.9	-0.685003	0.153494	-4.46274	8.09e-06	0.000836466	11325.5	9516.07	12889.4	19820.3	16997.3	17410.7	65.7216	52.8135	67.8429	99.9886	89.5392	100.514
Genetic Information Processing	ame04141	LOC724341	endoplasmic reticulum resident protein 29	724341	3860.22	-0.69751	0.131087	-5.32096	1.03e-07	3.02e-05	2894.48	2978.66	2961.99	4306.83	4601.32	5418.04	37.6835	37.4176	36.9026	48.7689	56.1578	71.705
Environmental Information Processing|Cellular Processes	ame04068|ame04144|ame04350	LOC550930	TGF-beta receptor type-1	550930	1450.8	-0.551094	0.130477	-4.2237	2.4e-05	0.00205961	1249.01	1164.83	1116.08	1876.14	1653.8	1644.93	6.93912	5.77993	5.30023	10.7451	8.63408	10.256
Environmental Information Processing	ame04512	LOC408393	agrin	408393	251.756	-1.15789	0.245804	-4.71063	2.47e-06	0.000319463	183.519	142.462	140.844	368.924	301.867	372.918	0.262004	0.198974	0.157362	0.438145	0.378781	0.503751
Environmental Information Processing	ame04310	LOC410190	tyrosine-protein kinase Dnt	410190	2291.8	-1.19945	0.376314	-3.18736	0.00143578	0.0351137	1692.71	1165.76	1312.41	4873.06	1521.2	3185.64	10.2636	6.7177	6.77092	27.2645	8.31594	20.6542
Cellular Processes	ame04144	LOC408901	actin-related protein 2/3 complex subunit 1A	408901	9111.86	-0.37333	0.102884	-3.62866	0.000284892	0.0118768	8163.09	7888.47	7765.63	10984.8	10355.1	9514	111.756	103.056	97.1447	129.323	130.452	129.308
Cellular Processes	ame04144	LOC727452	sorting nexin-6	727452	5818.7	-0.408887	0.0957842	-4.26884	1.96e-05	0.00171327	4893.83	4858.59	5247.51	6544.89	6435.17	6932.18	55.6612	53.3927	54.8962	66.0386	68.1608	78.6167
Cellular Processes	ame04214	Mblk-1	transcription factor mblk-1-like	408521	31092	-0.572413	0.153535	-3.72822	0.000192835	0.00905128	29237.5	23359.1	22412.3	38129.9	40215.2	33197.9	16.522	12.388	11.002	18.6267	20.9169	18.7258
Cellular Processes	ame04145	LOC410982	protein croquemort	410982	5021.21	-0.772328	0.170419	-4.53193	5.84e-06	0.000636999	4311.52	3438.63	3373.86	6786.56	5336.59	6880.08	10.956	8.40021	10.2402	18.577	14.013	19.8953
Cellular Processes	ame04142	LOC725038	NPC intracellular cholesterol transporter 2 homolog a	725038	214251	-0.814514	0.114348	-7.12314	1.05e-12	9.62e-10	172118	145422	148440	277050	258618	283857	3908.92	3147.25	3059.35	5416.57	5298.75	6308.88
Cellular Processes	ame04145	LOC412630	scavenger receptor class B member 1	412630	272.004	-2.14948	0.594719	-3.61427	0.00030119	0.0123772	51.1064	66.1097	183.524	612.927	529.346	189.013	0.454511	0.448779	1.2802	4.2595	3.95366	1.62105
Cellular Processes	ame04144	LOC551043	phosrestin-2	551043	124.963	-3.55584	1.16531	-3.05142	0.0022776	0.0482822	30.9736	0	27.742	431.968	226.401	32.6942	0.0560819	0	0.119489	2.09258	1.27638	0.220023
