# Supplementary material for: Enterococcus faecium Regulates Honey Bee Developmental Genes
Source: Int J Mol Sci. 2021 Nov 9;22(22):12105. doi: 10.3390/ijms222212105 (PMC8621553; doi:10.3390/ijms222212105)
Supplement: Supplementary file 1 [file ijms-22-12105-s001.zip › TableS6_RNA-Seq_DESeq2.xlsx]

## Sheet: Sheet1
gene_symbol	gene_desc	gene_id	baseMean	log2FoldChange	lfcSE	stat	pvalue	padj	En1_normalized_read_count	En2_normalized_read_count	En3_normalized_read_count	MF1_normalized_read_count	MF2_normalized_read_count	MF3_normalized_read_count	En1_fpkm	En2_fpkm	En3_fpkm	MF1_fpkm	MF2_fpkm	MF3_fpkm
LOC413385	uncharacterized LOC413385	413385	2286.44	-1.72366	0.11173	-15.427	1.08e-53	1.08e-49	992.704	1088.48	1108.61	3441.73	3429.43	3657.66	2.64244	2.66219	2.72006	7.5769	8.26343	9.10588
LOC410959	kinesin 12	410959	2243.79	3.33756	0.240058	13.9032	6.06e-44	3.04e-40	4033.54	3705.87	4512.35	269.688	454.957	486.326	18.639	16.3887	18.7268	1.05417	1.88094	2.33342
LOC726950	pupal cuticle protein 20	726950	827.174	2.37251	0.223732	10.6043	2.85e-26	9.52e-23	1342.71	1458.14	1359.36	255.678	205.917	341.245	23.5973	24.565	21.6849	3.27813	2.80761	5.57833
LOC410960	myosin-IB	410960	7603.88	0.985909	0.115351	8.54703	1.26e-17	3.17e-14	9686.22	10765.6	9864.42	5379.75	4637.98	5289.3	38.0945	39.8792	34.9883	18.1614	16.6499	20.5224
LOC102656816	uncharacterized LOC102656816	102656816	1293.5	1.85346	0.22142	8.3708	5.72e-17	1.15e-13	1981.54	1633.19	2464.77	491.509	521.799	668.187	18.5587	14.2976	19.8686	4.38479	4.25985	5.63894
LOC409814	beta-glucuronidase	409814	11090.8	1.28916	0.155062	8.31385	9.26e-17	1.55e-13	15083.4	16699.7	15439.5	5427.61	7567.17	6327.34	90.2775	96.6386	82.4578	27.9455	41.2789	37.5101
LOC413684	gustatory receptor for sugar taste 64f	413684	205.028	-2.70824	0.350383	-7.72938	1.08e-14	1.35e-11	61.9472	37.2449	64.02	428.465	369.788	268.705	0.326468	0.215932	0.268545	1.82101	1.62095	1.40287
LOC413676	patched domain-containing protein 3	413676	4280.97	0.856969	0.11811	7.2557	4e-13	4.01e-10	5237.64	5427.51	5884.51	3121.84	2785.81	3228.55	19.1575	17.754	18.8373	9.39071	8.85154	11.23
LOC725038	NPC intracellular cholesterol transporter 2 homolog a	725038	214251	-0.814514	0.114348	-7.12314	1.05e-12	9.62e-10	172118	145422	148440	277050	258618	283857	3908.92	3147.25	3059.35	5416.57	5298.75	6308.88
Mir1-1	microRNA 1-1	732491	2154.92	-0.871218	0.131301	-6.63527	3.24e-11	2.71e-08	1520.8	1689.06	1359.36	2849.82	2743.76	2766.74	0	0	0	0	0	0
LOC411378	prostaglandin reductase 1	411378	22128.9	-0.7957	0.124689	-6.3815	1.75e-10	1.35e-07	16289.8	16628	15611.3	31753.1	25327.8	27163.7	216.935	213.448	188.917	370.421	313.709	369.407
LOC100578835	uncharacterized LOC100578835	100578835	781.832	2.83962	0.451312	6.29193	3.14e-10	2.25e-07	655.866	2068.02	1392.44	108.576	257.665	208.425	1.92795	5.91253	3.64474	0.295882	0.724018	0.634468
JHBP-1	take-out-like carrier protein	449496	290873	-2.68662	0.432896	-6.20616	5.43e-10	3.63e-07	67431.1	84427.6	82779	747714	600595	162294	1379.12	1639.07	1546.77	13034.6	11036.2	3264.9
LOC102653875	uncharacterized LOC102653875	102653875	855.429	0.900088	0.14622	6.15571	7.47e-10	4.68e-07	1163.83	1151.8	1025.39	636.277	600.501	554.779	9.68571	9.34762	10.0962	4.76785	4.28316	5.26814
LOC409153	zinc finger protein 423-like	409153	5195.44	-1.823	0.299756	-6.0816	1.19e-09	7.02e-07	1984.63	3014.04	1870.45	5877.09	6780.16	11646.3	5.09237	4.18644	4.24414	4.35526	4.56428	4.44699
LOC408740	phosphatase and actin regulator 4	408740	8791.75	-0.55306	0.0915463	-6.04132	1.53e-09	8.07e-07	7383.33	6960.14	7036.87	10277.3	10115.8	10977.1	5.27814	5.70248	4.26364	6.34927	8.56521	7.93265
LOC413829	diuretic hormone receptor	413829	1153.14	3.21673	0.532367	6.04231	1.52e-09	8.07e-07	788.278	4042.93	1415.91	154.107	206.995	310.595	1.80701	9.93011	3.17173	0.281345	0.466012	0.725235
LOC107964594	uncharacterized LOC107964594	107964594	10521.2	1.58754	0.270874	5.86083	4.61e-09	2.31e-06	9690.86	16405.4	21270.7	4881.23	5834.67	5044.1	2.32819	2.16097	1.78033	1.36659	1.49006	1.83512
LOC727522	uncharacterized LOC727522	727522	630.265	2.58263	0.450212	5.73648	9.67e-09	4.62e-06	504.87	1555.9	1180.1	114.413	258.744	167.558	3.95359	11.4264	8.35535	0.797934	1.89735	1.32708
LOC411336	uncharacterized LOC411336	411336	234.4	1.60849	0.287573	5.59332	2.23e-08	9.71e-06	309.736	360.344	389.455	103.906	93.7945	149.167	0.826669	0.842776	0.971156	0.244678	0.274894	0.3552
LOC102654964	uncharacterized LOC102654964	102654964	1024.3	0.878153	0.157815	5.56446	2.63e-08	1.1e-05	1183.19	1293.33	1504.47	735.512	682.436	746.857	4.43234	4.12339	4.15612	2.12674	1.94694	2.94189
LOC725878	protein held out wings	725878	3180.32	0.755075	0.136149	5.54595	2.92e-08	1.17e-05	3891.83	4539.22	3550.98	2324.45	2403.08	2372.37	21.6803	26.3952	17.7544	11.2338	12.1955	13.1889
LOC725078	uncharacterized LOC725078	725078	68.7238	2.48416	0.461289	5.38527	7.23e-08	2.59e-05	96.0181	116.39	137.643	17.5122	16.1715	28.6074	0.539504	0.682608	0.81868	0.1097	0.0852632	0.0881783
LOC102656248	uncharacterized LOC102656248	102656248	161.427	1.71604	0.320242	5.35857	8.39e-08	2.74e-05	257.081	239.298	246.477	51.3691	90.5602	83.7788	1.42914	1.25527	1.16121	0.247322	0.389371	0.363185
LOC726470	solute carrier organic anion transporter family member 1A5	726470	437.469	3.62961	0.679008	5.34546	9.02e-08	2.83e-05	257.855	1369.68	801.318	16.3447	93.7945	85.8222	1.21093	5.5569	3.43164	0.0692383	0.353296	0.417448
LOC113219373	uncharacterized LOC113219373	113219373	129.697	-1.92278	0.361605	-5.31734	1.05e-07	3.02e-05	45.6861	61.4541	55.484	185.629	269.525	160.406	0.44746	0.309594	0.464509	1.2666	1.89042	1.20448
LOC724341	endoplasmic reticulum resident protein 29	724341	3860.22	-0.69751	0.131087	-5.32096	1.03e-07	3.02e-05	2894.48	2978.66	2961.99	4306.83	4601.32	5418.04	37.6835	37.4176	36.9026	48.7689	56.1578	71.705
Reck	reversion-inducing-cysteine-rich protein with kazal motifs	408485	1675.46	0.947381	0.17897	5.29351	1.2e-07	3.34e-05	1904.1	2647.18	2068.91	1069.41	1249.52	1113.64	7.54013	10.0704	7.73054	3.64758	4.52197	4.29004
LOC113219364	uncharacterized LOC113219364	113219364	23.9946	7.90538	1.50796	5.24243	1.58e-07	4.01e-05	24.0045	77.2831	42.68	0	0	0	0.433803	0.681281	0.342051	0.0252343	0	0.025535
LOC411019	neuropilin and tolloid-like protein 2	411019	3232.64	0.932832	0.177682	5.25	1.52e-07	4.01e-05	3723.03	5004.78	4001.25	1960.2	2160.51	2546.06	10.4209	13.2122	9.88772	4.90559	5.685	7.10894
LOC726672	uncharacterized LOC726672	726672	43588.6	-1.00712	0.19204	-5.24435	1.57e-07	4.01e-05	30927.1	33509.2	22452.9	67537.6	52488.3	54616.6	286.63	295.396	188.601	522.01	430.933	486.302
LOC409138	synaptotagmin 7	409138	231.736	1.45245	0.277152	5.24062	1.6e-07	4.01e-05	295.798	310.064	412.929	102.738	140.153	128.733	0.864242	0.956179	1.0908	0.289982	0.411254	0.376444
LOC100576657	uncharacterized LOC100576657	100576657	938.831	0.870319	0.16677	5.21868	1.8e-07	4.22e-05	1271.47	1043.79	1326.28	633.942	638.234	719.272	5.29775	4.19683	5.03597	2.33595	2.54203	3.14031
LOC411307	mitochondrial enolase superfamily member 1	411307	1105.31	2.91071	0.55782	5.21801	1.81e-07	4.22e-05	713.941	3743.11	1396.7	137.763	268.446	371.896	7.04537	37.1475	13.5418	0.971568	2.26312	3.74916
LOC726101	uncharacterized LOC726101	726101	857.707	1.45624	0.279726	5.20594	1.93e-07	4.4e-05	1269.92	1433	1068.07	643.282	360.085	371.896	3.83161	4.15383	2.94783	1.70671	0.966964	1.10149
LOC102654588	uncharacterized LOC102654588	102654588	579.52	-1.0568	0.203341	-5.1972	2.02e-07	4.51e-05	388.719	316.581	423.599	856.93	812.886	678.404	1.2263	0.818917	0.633725	2.24063	1.87769	1.85054
LOC113219295	uncharacterized LOC113219295	113219295	5598.05	-1.22833	0.236597	-5.19166	2.08e-07	4.54e-05	2603.33	4548.53	2895.84	7941.2	8771.41	6827.97	0.0400494	0.112585	0	0	0.101957	0.0524158
LOC410509	mucin-2	410509	104.76	3.1537	0.614427	5.13275	2.86e-07	5.96e-05	76.6596	214.158	274.219	29.187	11.8591	22.4772	0.125595	0.302465	0.386845	0.0476481	0.0198576	0.0478689
LOC551089	translation initiation factor IF-2	551089	201.841	-1.23849	0.24193	-5.11923	3.07e-07	6.28e-05	113.054	123.839	123.772	276.693	322.351	251.336	0.90874	1.00486	0.826311	1.86591	2.06761	1.82206
LOC100577513	uncharacterized LOC100577513	100577513	3055.77	-1.21959	0.23929	-5.0967	3.46e-07	6.8e-05	1416.27	2086.64	2005.96	3174.38	5183.5	4467.86	15.834	21.7187	20.8685	30.8799	52.1427	48.2017
LOC726656	calcium-independent phospholipase A2-gamma	726656	11433.8	0.456009	0.0895534	5.09204	3.54e-07	6.83e-05	13284.6	12531	13862.5	9624.71	9548.71	9751.03	72.9769	65.8471	67.3698	45.3717	47.5525	52.4366
LOC107963993	palmitoleoyl-protein carboxylesterase NOTUM	107963993	58.5007	5.0062	0.985798	5.07832	3.81e-07	7.2e-05	48.0091	225.332	67.221	0	4.31239	6.13016	0.17122	0.816727	0.259452	0	0.0135326	0.0139875
LOC408761	uncharacterized LOC408761	408761	2129.06	1.75806	0.347855	5.05401	4.33e-07	8.03e-05	1796.47	5110.93	2952.39	845.256	984.303	1085.04	5.81649	15.9843	8.69561	2.38	2.84858	3.48518
LOC726864	uncharacterized LOC726864	726864	1229.48	-1.00849	0.199999	-5.04247	4.6e-07	8.38e-05	671.353	847.321	931.492	1853.96	1689.38	1383.37	13.205	15.9932	16.7568	31.9517	29.0266	26.2739
LOC412797	facilitated trehalose transporter Tret1	412797	1384.6	5.11432	1.01858	5.02101	5.14e-07	9.2e-05	873.455	5754.33	1446.85	25.6846	56.0611	151.211	8.63318	53.3179	13.0211	0.103411	0.535432	1.45482
LOC413914	carbohydrate sulfotransferase 11	413914	2213.31	-1.07999	0.217064	-4.97547	6.51e-07	0.000114503	1444.92	1631.33	1187.57	3301.63	3438.05	2276.33	13.2211	14.31	9.73927	26.8986	29.5906	21.4163
LOC102654184	plectin	102654184	1827.75	0.609863	0.123473	4.93925	7.84e-07	0.00013558	2046.58	2236.56	2343.13	1416.15	1386.43	1537.65	6.4469	5.99694	7.3795	4.97344	5.15536	4.9362
LOC107965783	uncharacterized LOC107965783	107965783	733.03	-1.16157	0.235851	-4.92503	8.43e-07	0.000143349	587.724	392.002	377.718	1126.62	927.164	986.955	0	0	18.4549	35.8948	0	32.5797
LOC102656530	uncharacterized LOC102656530	102656530	142.242	-2.87963	0.590608	-4.87571	1.08e-06	0.000178217	25.5532	61.4541	14.938	347.909	254.431	149.167	0.179238	0.581459	0.137959	2.84069	2.04594	1.39926
LOC552325	protein germ cell-less	552325	5817.3	-0.890372	0.182912	-4.86777	1.13e-06	0.000182527	3455.1	4783.17	3993.78	7051.58	6727.33	8892.81	16.6131	15.9534	13.7286	17.8284	15.2851	19.6873
LOC409899	putative sodium-dependent multivitamin transporter	409899	1477.62	2.08815	0.429255	4.86459	1.15e-06	0.000182541	1276.89	4230.09	1670.92	407.451	647.937	632.428	4.52431	15.1842	5.13523	0.948456	1.93055	2.27639
LOC113219298	G-protein coupled receptor Mth2-like	113219298	185.296	-4.68657	0.96659	-4.84856	1.24e-06	0.000191837	18.5842	19.5536	3.201	563.893	484.066	22.4772	0.151087	0.209968	0.0387234	4.40578	4.0087	0.237185
Mir6054	microRNA 6054	104794348	22744.3	0.714437	0.147603	4.84025	1.3e-06	0.000195874	27126.7	32809	24854.7	17734	15712.2	18229
LOC413759	SCY1-like protein 2	413759	3820.32	1.15952	0.23965	4.83841	1.31e-06	0.000195874	4804	5103.48	5927.19	1577.27	2734.06	2775.94	10.0888	10.6981	13.2189	2.97452	4.90292	5.34434
LOC409255	active breakpoint cluster region-related protein	409255	1697.72	0.764062	0.158635	4.81647	1.46e-06	0.000215453	2127.89	2429.3	1853.38	1355.44	1169.74	1250.55	4.91112	6.31527	5.80003	3.79597	3.53331	3.80154
LOC408767	protein dachsous	408767	1515.6	0.702347	0.14591	4.81356	1.48e-06	0.000215453	1755.43	1951.63	1925.94	1019.21	1280.78	1160.64	2.64555	2.76914	2.60133	1.35128	1.77259	1.76268
LOC412883	Allatostatin C receptor	412883	174.938	2.87254	0.597807	4.80513	1.55e-06	0.000221531	122.346	511.186	290.224	30.3545	29.1086	66.41	0.317812	1.34963	0.707971	0.0740773	0.0630214	0.167456
LOC102656786	uncharacterized LOC102656786	102656786	613.77	2.39005	0.498664	4.79291	1.64e-06	0.000232145	1074.78	1166.7	851.467	140.098	78.7012	370.874	2.73485	2.4464	1.47327	0.769258	0.689396	0.652099
LOC408915	protein couch potato	408915	2634.8	-1.15996	0.2434	-4.76563	1.88e-06	0.000262188	1780.98	1194.63	1912.07	3364.68	4550.65	3005.82	1.49043	0.922832	1.38009	2.51044	3.61342	2.49696
Psq	pipsqueak	406123	1660.44	1.31598	0.27758	4.74091	2.13e-06	0.000292242	1539.39	2841.78	2727.25	756.527	1115.83	981.847	5.89193	9.73949	8.69597	2.36206	3.48219	3.86682
TyHyd	tyrosine hydroxylase	408930	217.593	-3.55732	0.751191	-4.73557	2.18e-06	0.000295985	27.8762	30.727	43.747	528.868	625.297	49.0412	0.153874	0.125359	0.278925	2.16804	2.63789	0.364272
LOC413270	kelch-like protein 10	413270	590.205	1.45154	0.307183	4.72534	2.3e-06	0.000307135	646.574	1218.84	727.694	308.215	377.334	262.575	1.88941	3.39982	1.74033	0.762386	0.945528	0.686724
LOC409649	solute carrier organic anion transporter family member 5A1	409649	3867.81	1.85506	0.393454	4.71481	2.42e-06	0.0003192	3431.1	9679.01	5071.45	1036.72	2204.71	1783.88	18.7379	48.6795	24.3885	4.86591	10.8101	9.15366
LOC408393	agrin	408393	251.756	-1.15789	0.245804	-4.71063	2.47e-06	0.000319463	183.519	142.462	140.844	368.924	301.867	372.918	0.262004	0.198974	0.157362	0.438145	0.378781	0.503751
LOC409882	TLD domain-containing protein 2	409882	39985.3	0.45295	0.096181	4.70935	2.49e-06	0.000319463	44219.5	45754.4	48660.6	34472.2	31848.1	34957.2	147.696	143.134	145.887	100.362	98.6843	117.477
LOC100576702	uncharacterized LOC100576702	100576702	11082	-1.43504	0.307348	-4.6691	3.03e-06	0.000383982	6575.69	3552.23	7824.32	18921.3	11576.6	18042.1	3.04003	1.50414	1.06687	7.97742	3.71799	4.52111
LOC410998	E3 ubiquitin-protein ligase TRIM9	410998	2366.43	0.757013	0.162247	4.66581	3.07e-06	0.000385298	2563.07	2999.14	3358.92	1648.48	1970.76	1658.21	9.58207	10.7852	11.231	5.18501	6.67033	6.08421
LOC100578061	late cornified envelope-like proline-rich protein 1	100578061	16437.9	-1.14096	0.244961	-4.65771	3.2e-06	0.000395821	10666.5	12447.2	7655.73	26559	24841.5	16457.4	1.68603	0.916957	2.05347	0.440159	2.68816	0.442742
LOC100578776	uncharacterized LOC100578776	100578776	3500.22	0.501717	0.108167	4.63834	3.51e-06	0.000424298	3921.26	4282.23	4104.75	3091.49	2746.99	2854.61	10.2386	10.6986	9.56733	7.00065	6.87128	7.57294
Obp16	odorant binding protein 16	551719	1031.85	-5.31167	1.14947	-4.62097	3.82e-06	0.00045593	32.5223	65.1785	54.417	3041.29	2891.46	106.256	1.05314	2.24585	1.70846	86.0766	88.0302	3.56818
LOC410439	basement membrane-specific heparan sulfate proteoglycan core protein	410439	3727.96	-0.708828	0.154038	-4.60164	4.19e-06	0.000494483	2978.89	3102.5	2408.22	4158.56	4984.05	4735.55	9.89228	10.2089	7.82907	12.5348	16.1822	16.4912
LOC100576555	cytochrome b561 domain-containing protein 2	100576555	280.282	-3.66117	0.797327	-4.5918	4.39e-06	0.000506467	44.9117	49.3495	28.809	702.823	812.886	42.9111	0.0616124	0.118741	0.0393066	1.58975	1.1947	0.0671095
LOC102655512	uncharacterized LOC102655512	102655512	130.152	2.14362	0.466605	4.59407	4.35e-06	0.000506467	308.962	121.977	205.931	35.0244	52.8268	56.1931	1.81356	0.669911	1.09011	0.178469	0.269755	0.318785
LOC552709	polypyrimidine tract-binding protein 2	552709	4133.04	-0.819568	0.179026	-4.57792	4.7e-06	0.000535091	3268.49	2772.88	2926.78	6037.04	5626.59	4166.46	3.1567	2.1432	2.22199	6.56595	5.9765	4.53915
LOC102655477	uncharacterized LOC102655477	102655477	3582.43	-1.14888	0.251532	-4.56752	4.94e-06	0.000556013	2910.74	2288.7	1479.93	4616.22	4656.31	5542.68	0.676389	0.625595	0.649481	0.579692	0.503208	0.426397
LOC726997	uncharacterized LOC726997	726997	2145.06	1.5332	0.336745	4.55301	5.29e-06	0.000589179	3179.44	4359.51	2026.23	1004.03	1528.74	772.4	7.25115	9.49179	4.02043	1.89143	3.08135	1.61685
LOC551649	nuclear receptor subfamily 2 group F member 6	551649	11333	-0.691062	0.152414	-4.53412	5.78e-06	0.000636999	10197.3	8281.4	7527.69	14993.9	13165.7	13831.7	0.0322781	0.0870932	0.164756	0.0839865	0.0544241	0.0843809
LOC410982	protein croquemort	410982	5021.21	-0.772328	0.170419	-4.53193	5.84e-06	0.000636999	4311.52	3438.63	3373.86	6786.56	5336.59	6880.08	10.956	8.40021	10.2402	18.577	14.013	19.8953
LOC409257	uncharacterized LOC409257	409257	410.102	1.26175	0.280506	4.49812	6.86e-06	0.000723613	483.188	756.071	497.222	260.348	194.058	269.727	3.1129	4.83755	3.08444	1.3595	1.02251	1.40651
LOC724768	uncharacterized LOC724768	724768	256.472	2.46877	0.551653	4.47522	7.63e-06	0.000797284	177.324	675.995	450.274	43.1968	116.435	75.6053	10.8094	45.877	27.1543	1.08875	5.47094	3.83716
LOC412150	endoplasmin	412150	14659.9	-0.685003	0.153494	-4.46274	8.09e-06	0.000836466	11325.5	9516.07	12889.4	19820.3	16997.3	17410.7	65.7216	52.8135	67.8429	99.9886	89.5392	100.514
LOC412778	chondroitin sulfate proteoglycan 4	412778	2673.43	0.504937	0.11389	4.43355	9.27e-06	0.00094842	3292.49	3215.16	2901.17	2261.41	2100.13	2270.2	5.87446	5.34856	4.68969	3.4826	3.55881	4.17751
LOC551553	facilitated trehalose transporter Tret1	551553	3099.68	-1.76973	0.401498	-4.40781	1.04e-05	0.00103894	1605.21	1530.76	1080.87	7233.71	5151.15	1996.39	8.56582	7.61785	5.18436	33.6119	25.5057	10.4169
LOC412960	receptor-type tyrosine-protein phosphatase kappa	412960	2103.07	0.738421	0.167544	4.40733	1.05e-05	0.00103894	2210.74	2842.72	2837.15	1421.99	1554.62	1751.18	0.233	0.151601	0.204579	0.0437127	0.128885	0.114242
LOC113219066	uncharacterized LOC113219066	113219066	480.061	1.2669	0.287211	4.41103	1.03e-05	0.00103894	891.265	544.706	598.587	290.703	221.01	334.093	3.13963	2.06761	1.578	0.360641	0.661109	1.00672
LOC724356	RING finger protein 17	724356	1023.46	0.679956	0.155416	4.37508	1.21e-05	0.00119328	1101.11	1278.43	1402.04	778.709	818.276	762.183	3.44992	3.91505	3.98196	2.1309	2.36116	2.4171
LOC410857	protein lethal(2)essential for life	410857	158335	0.866889	0.198624	4.36448	1.27e-05	0.00124047	204516	248627	160428	93908.6	123264	119265	1264.39	1655.47	767.754	741.191	796.786	974.648
LOC412795	cadherin-99C	412795	5026.1	0.676846	0.155497	4.3528	1.34e-05	0.0012959	5730.12	6877.27	5945.33	3323.82	3891.93	4388.17	11.8812	13.6732	11.3992	5.88486	7.35846	8.7534
LOC725091	lachesin	725091	1782.81	0.657819	0.151936	4.32958	1.49e-05	0.00142596	1917.27	2122.03	2508.52	1447.68	1347.62	1353.74	8.03258	8.44683	9.67527	5.28318	5.18177	5.44931
LOC724315	forkhead box protein D3	724315	374.488	3.04788	0.704289	4.3276	1.51e-05	0.00142596	159.514	1291.47	553.773	29.187	106.732	106.256	0.860781	6.7207	2.80314	0.130666	0.544171	0.581404
LOC408554	neural-cadherin	408554	291.893	0.920128	0.213123	4.31735	1.58e-05	0.00147981	374.006	405.038	367.048	187.964	184.355	232.946	0.947187	0.977091	0.808271	0.398074	0.396254	0.552281
LOC408597	U2 small nuclear ribonucleoprotein auxiliary factor 35 kDa subunit-related protein 2	408597	18808.7	0.673713	0.156189	4.31345	1.61e-05	0.00149221	21690	26497.9	21178.9	15327.8	12416.5	15741.2	7.63896	7.21884	7.72503	6.94697	7.45019	7.93352
LOC102655784	uncharacterized LOC102655784	102655784	78.036	-2.59182	0.60124	-4.31078	1.63e-05	0.00149648	7.7434	24.2092	35.211	161.112	133.684	106.256	0.0295858	0.068523	0.227453	1.00137	0.5981	0.657959
LOC102653672	uncharacterized LOC102653672	102653672	875.1	1.3391	0.310997	4.30584	1.66e-05	0.00151636	1207.2	1125.73	1430.85	283.698	597.266	605.864	0.368124	0.133153	0.176628	0.149723	0.290787	0.391164
Imd	immune deficiency	100302584	3857.62	-0.495004	0.115257	-4.29478	1.75e-05	0.00157096	3517.83	3107.15	2980.13	4540.33	4612.1	4388.17	52.2254	42.7766	38.5565	58.1601	59.5354	63.9137
LOC100576755	uncharacterized LOC100576755	100576755	136.419	1.71888	0.400518	4.29164	1.77e-05	0.00157096	223.784	165.74	237.941	88.7285	61.4516	40.8677	0.877164	0.338462	0.530137	0.412274	0.215551	0.286805
LOC100577138	dual 3',5'-cyclic-AMP and -GMP phosphodiesterase 11	100577138	8574.95	0.735346	0.171289	4.29301	1.76e-05	0.00157096	9461.66	9974.18	12708	5524.52	6790.94	6990.42	24.7041	23.8039	29.5006	12.6184	16.2316	17.8679
LOC727452	sorting nexin-6	727452	5818.7	-0.408887	0.0957842	-4.26884	1.96e-05	0.00171327	4893.83	4858.59	5247.51	6544.89	6435.17	6932.18	55.6612	53.3927	54.8962	66.0386	68.1608	78.6167
LOC552374	protein Wnt-1	552374	1423.98	0.640851	0.150891	4.24712	2.17e-05	0.00187175	1926.56	1751.44	1526.88	1036.72	1179.44	1122.84	1.92693	1.67334	1.84629	1.02074	1.37893	0.953399
LOC550930	TGF-beta receptor type-1	550930	1450.8	-0.551094	0.130477	-4.2237	2.4e-05	0.00205961	1249.01	1164.83	1116.08	1876.14	1653.8	1644.93	6.93912	5.77993	5.30023	10.7451	8.63408	10.256
LOC100578226	zinc finger protein GLI1	100578226	36056.1	0.938976	0.222971	4.21121	2.54e-05	0.00214029	37026.6	64375	40775.4	24786.8	26377.8	22995.2	168.363	284.186	170.211	97.4041	108.622	103.17
Mrjp1	major royal jelly protein 1	406090	155.213	-2.71045	0.644619	-4.20472	2.61e-05	0.00218422	27.1019	70.7653	25.608	155.275	149.856	502.673	0.134509	0.194769	0	0.481593	1.27439	2.15592
Def1	defensin 1	406143	11853.7	-2.86145	0.681519	-4.19863	2.69e-05	0.00222527	3095.04	3783.15	1724.27	30632.3	25271.7	6615.46	109.578	129.552	57.1842	932.85	804.201	231.085
LOC412767	protein takeout	412767	1497.7	-0.64761	0.154618	-4.18847	2.81e-05	0.00230823	1273.01	1100.59	1126.75	1886.65	2007.42	1591.8	3.34175	2.06805	5.59832	7.47425	7.4504	6.34612
LOC100578173	uncharacterized LOC100578173	100578173	3260.3	-0.932595	0.222814	-4.18554	2.84e-05	0.0023098	1996.25	1917.18	2812.61	4497.13	4971.11	3367.5	4.21946	3.66642	4.73783	7.81061	8.35413	6.0872
LOC724226	acyl-CoA Delta(11) desaturase	724226	120.523	-10.4819	2.50805	-4.17929	2.92e-05	0.0023098	0	0	0	323.392	395.662	4.08677	0	0	0	3.97606	5.46319	0
Trxr-1	thioredoxin reductase 1	410032	20070.4	-0.346764	0.0830094	-4.1774	2.95e-05	0.0023098	18173	17385.9	17449.7	23273.7	21787.3	22352.6	149.188	135.327	127.557	162.777	163.137	179.485
LOC102656864	uncharacterized LOC102656864	102656864	83.1352	-1.48734	0.35603	-4.17758	2.95e-05	0.0023098	37.1683	49.3495	44.814	133.093	105.654	128.733	0.297278	0.621083	0.958658	0.387369	0.525131	1.47974
LOC102653612	uncharacterized LOC102653612	102653612	27.0168	2.68374	0.642401	4.17767	2.95e-05	0.0023098	47.2347	50.2806	42.68	8.17236	8.62478	5.10846	3.4778	1.6005	1.91124	0.51121	0.863659	0.385594
LOC552370	neurofibromin	552370	2996.61	0.483152	0.11573	4.17483	2.98e-05	0.0023179	3436.52	3404.18	3640.61	2505.41	2693.09	2299.83	3.8006	3.74423	3.83831	2.66265	2.99141	2.74327
LOC410370	actin-binding Rho-activating protein	410370	26822.8	1.4436	0.346582	4.16525	3.11e-05	0.00239885	24620.1	56084.3	36970.5	8774.78	15254	19233.4	491.825	1059.06	651.747	142.846	258.489	359.213
LOC726725	pro-resilin	726725	1855.42	1.08476	0.260812	4.15917	3.19e-05	0.00244478	2375.67	1852	3338.65	954.999	1206.39	1404.83	15.1199	10.4324	18.4435	5.86556	7.25685	9.72001
LOC724148	homeobox protein MSX-2	724148	64.0107	3.05142	0.735278	4.15002	3.32e-05	0.00252537	44.9117	196.467	101.365	10.5073	22.6401	8.17354	0	0.315732	0.0465038	0	0.0229974	0
LOC409835	E3 ubiquitin-protein ligase MARCH2	409835	155.467	2.45674	0.594745	4.13074	3.62e-05	0.00272614	104.536	375.242	309.43	29.187	77.6231	36.7809	0.934743	3.37422	2.67599	0.250505	0.625311	0.323655
LOC726252	titin	726252	414.697	-2.97196	0.721526	-4.119	3.81e-05	0.00284743	84.403	143.393	53.35	1186.16	921.774	99.1042	0.124757	0.157701	0.0385349	1.31325	1.11427	0.143623
LOC411693	Kv channel-interacting protein 1	411693	6675.9	0.564031	0.137066	4.11504	3.87e-05	0.00287521	7137.87	7757.18	8999.08	5829.23	5207.21	5124.81	34.7332	43.2107	48.5109	25.4304	23.5147	23.9812
LOC100576717	restin homolog	100576717	2425.23	0.390255	0.094994	4.10821	3.99e-05	0.00293983	2688.51	2754.26	2811.55	2104.97	2052.7	2139.42	7.49895	7.29695	7.15744	4.82861	5.22686	5.95095
LOC413200	fibroblast growth factor receptor homolog 1	413200	8846.26	0.422504	0.10294	4.10436	4.05e-05	0.00296387	10105.9	10040.3	10250.7	8140.84	6993.62	7546.22	14.2909	16.0705	17.1749	8.77721	6.21562	7.05834
LOC726629	uncharacterized LOC726629	726629	160.682	-3.52651	0.859505	-4.10295	4.08e-05	0.00296387	18.5842	30.727	27.742	577.903	284.618	24.5206	0.599723	0.896768	0.777966	15.0841	8.09785	0.786487
LOC551320	schwannomin-interacting protein 1 homolog	551320	2021.34	0.485045	0.118328	4.09915	4.15e-05	0.00296992	2261.07	2445.13	2367.67	1712.69	1787.49	1553.99	4.36444	4.77896	3.84657	3.31801	3.45014	3.56324
LOC412401	lipophorin receptor	412401	2915.53	0.696283	0.169844	4.09956	4.14e-05	0.00296992	3417.94	3894.88	3504.03	2337.3	2536.76	1802.27	14.7989	15.8589	13.6888	8.72679	9.78061	7.4435
Cpap3-c	cuticular protein analogous to peritrophins 3-C	725932	1120.88	0.851781	0.208046	4.09421	4.24e-05	0.00301249	1603.66	1597.81	1125.69	762.365	723.404	912.371	16.3145	17.1094	9.13672	4.84285	6.93731	7.49768
LOC724992	RRP15-like protein	724992	1104.08	-0.716055	0.175861	-4.0717	4.67e-05	0.00329554	926.885	746.76	832.261	1587.77	1290.48	1240.33	20.7012	15.6467	16.6895	31.6803	26.6505	27.0385
Br-c	broad-complex	552255	197.827	1.30161	0.320162	4.06549	4.79e-05	0.00336097	209.072	340.791	294.492	138.93	104.576	99.1042	0.658129	0.987383	0.787104	0.396556	0.319437	0.313763
LOC113219038	uncharacterized LOC113219038	113219038	40.3518	2.19231	0.539943	4.06027	4.9e-05	0.00341315	50.3321	65.1785	83.2261	12.8423	17.2496	13.282	0.0365805	0.048947	0.0539459	0.00500809	0.0121783	0.0100622
LOC551272	talin-1	551272	4200.31	0.525136	0.129445	4.05684	4.97e-05	0.00343971	4514.4	5461.96	4893.27	3578.33	3172.84	3581.03	7.77086	8.90502	7.28588	5.48149	4.89735	6.40132
LOC411525	choline/ethanolamine kinase	411525	33748.4	0.487055	0.120336	4.04747	5.18e-05	0.00350772	36699.1	41345.5	40129.9	30877.5	27934.6	25503.5	203.575	217.207	190.093	151.321	146.137	144.835
LOC551540	replication factor C subunit 2	551540	607.237	-0.572876	0.141511	-4.04829	5.16e-05	0.00350772	487.06	504.668	472.681	758.862	702.92	717.228	7.17839	7.04827	5.85948	10.2284	9.75771	10.667
LOC410997	organic cation transporter 1	410997	23705.7	3.0924	0.76659	4.03397	5.48e-05	0.003666	12853.3	77703.1	36751.8	2115.47	6180.74	6629.76	19.4887	120.138	48.0579	1.95038	5.60199	7.56256
LOC100577266	uncharacterized LOC100577266	100577266	334.108	1.42447	0.353876	4.02535	5.69e-05	0.00377782	392.59	373.38	694.617	201.974	211.307	130.777	2.00423	1.7364	3.54233	0.61398	0.680829	0.264439
LOC409082	coronin-7	409082	1897.53	0.567055	0.141483	4.00793	6.13e-05	0.00401425	2255.65	2311.04	2230.03	1702.19	1327.14	1559.1	5.89247	5.78776	6.25619	4.88179	3.86354	4.31105
LOC410739	teneurin-m	410739	2459.81	1.00721	0.251878	3.99878	6.37e-05	0.00414552	3213.51	3409.77	3231.95	2169.18	1082.41	1652.08	2.05724	2.78732	2.67489	1.10662	1.06102	1.30719
LOC551454	voltage-dependent calcium channel subunit alpha-2/delta-3	551454	270.524	1.56467	0.392684	3.98456	6.76e-05	0.00437342	247.014	527.946	438.537	106.241	116.435	186.97	1.29579	3.00753	1.93663	0.371154	0.494552	0.799117
LOC724772	leucine-rich repeat neuronal protein 1	724772	1960.5	3.29944	0.829069	3.9797	6.9e-05	0.00443524	964.053	6460.12	3254.35	166.95	508.862	408.677	7.91421	54.5784	25.825	0.435677	3.77722	3.15834
LOC551465	homogentisate 1,2-dioxygenase	551465	5328.51	-0.808549	0.204263	-3.95838	7.55e-05	0.00478891	3575.9	4639.78	3403.73	7149.65	7883.05	5318.93	9.96671	16.1412	6.64907	27.8051	38.3833	20.8535
LOC413117	proton-coupled amino acid transporter-like protein pathetic	413117	4927.24	1.60759	0.406028	3.95931	7.52e-05	0.00478891	3340.5	11508.7	7410.32	1727.87	3274.18	2301.87	10.9729	37.2285	21.3963	4.60549	9.11907	7.6328
LOC726097	uncharacterized LOC726097	726097	146.92	3.57518	0.903678	3.95625	7.61e-05	0.00480132	110.731	559.604	142.978	8.17236	53.9049	6.13016	0.172692	0.73339	0.0737001	0	0.0363194	0.0375984
LOC100578810	facilitated trehalose transporter Tret1-2 homolog	100578810	28.0351	4.22833	1.06929	3.95435	7.67e-05	0.00480936	18.5842	55.8673	85.3601	0	4.31239	4.08677	0.0992719	0.295271	0.416544	0	0.0179282	0.0185367
LOC725930	retinol dehydrogenase 12	725930	8244.85	-0.712412	0.180528	-3.94627	7.94e-05	0.00488299	6910.98	6832.57	5004.23	9100.51	9915.27	11705.5	97.2877	92.5974	62.8133	110.369	126.901	162.659
LOC724613	uncharacterized LOC724613	724613	2051.7	0.731191	0.185203	3.94804	7.88e-05	0.00488299	2165.05	3142.54	2375.14	1489.7	1467.29	1670.47	4.10654	6.33226	4.20962	1.84529	2.14515	2.41096
LOC100577623	putative uncharacterized protein DDB_G0282133	100577623	9680	0.398585	0.100985	3.94697	7.91e-05	0.00488299	10649.5	10837.3	11539.6	8592.65	8678.69	7782.23	79.9547	76.0167	78.804	50.7982	54.0144	55.5963
LOC551668	regulatory-associated protein of mTOR	551668	1903.31	0.666137	0.169097	3.93938	8.17e-05	0.00499464	1984.63	2326.87	2694.18	1609.96	1458.67	1345.57	6.17817	6.77188	7.59627	4.27253	4.06352	4.05018
LOC725474	polycomb group protein Pc	725474	598.11	0.899065	0.229221	3.92227	8.77e-05	0.00533073	600.113	824.974	911.219	470.494	395.662	386.2	3.69591	5.09378	5.37216	2.52261	2.24448	2.41623
LOC412175	E3 ubiquitin-protein ligase SH3RF3	412175	1454.8	0.706996	0.180333	3.9205	8.84e-05	0.00533765	1477.44	1790.55	2145.74	1139.46	1063	1112.62	6.61463	7.6362	8.24287	4.5405	4.36992	4.77647
LOC100578587	putative uncharacterized protein DDB_G0282133	100578587	115.27	3.31604	0.84617	3.91889	8.9e-05	0.00534121	114.602	455.319	58.685	7.00488	35.5772	20.4339	0.429285	1.69011	0.221701	0.0265944	0.116331	0.0667978
LOC412843	phosphoenolpyruvate carboxykinase	412843	2739.02	1.81647	0.464474	3.91081	9.2e-05	0.00549014	1789.5	7791.63	3219.14	833.581	1441.42	1358.85	7.00226	29.4242	12.5326	2.89901	5.72581	5.61778
LOC412287	peptidyl-prolyl cis-trans isomerase FKBP4	412287	5562.28	-0.437499	0.112269	-3.89689	9.74e-05	0.00578099	4982.1	4655.61	4536.89	6940.67	5997.46	6260.93	50.3371	45.6999	41.7964	60.8743	55.7803	62.5235
LOC725458	hydroxylysine kinase	725458	1137.36	1.88738	0.484716	3.89378	9.87e-05	0.00578708	854.871	3108.09	1409.51	255.678	559.533	636.514	10.4133	34.8696	15.3474	2.48041	6.32112	7.31659
LOC552146	transcription factor Sp8	552146	82.9914	-1.34566	0.34585	-3.89089	9.99e-05	0.00582257	49.5578	50.2806	40.546	115.581	133.684	108.299	0.223413	0.184902	0.134186	0.333819	0.531955	0.412346
LOC552279	sodium-independent sulfate anion transporter	552279	424.888	1.75043	0.451146	3.87996	0.000104472	0.00605513	624.892	1036.34	304.095	151.772	176.808	255.423	4.56327	7.47212	2.1349	1.02777	1.09631	2.01474
LOC102655156	uncharacterized LOC102655156	102655156	87.0753	-1.98001	0.512847	-3.86082	0.000113005	0.00651207	37.1683	36.3138	32.01	200.807	147.699	68.4534	1.05314	0.816674	1.02508	4.57854	3.5389	1.95674
LOC724993	uncharacterized LOC724993	724993	8235.77	-1.42562	0.369686	-3.8563	0.000115116	0.00659584	6324.81	1958.15	5121.6	14149.9	9999.36	11860.8	99.2762	28.8828	74.4704	192.008	140.274	179.402
LOC725964	uncharacterized LOC725964	725964	14543.8	0.757416	0.19664	3.8518	0.000117254	0.00668013	16968.9	22947.5	14912.4	9447.25	10927.6	12059	50.5803	66.7376	40.68	24.329	29.7138	35.3196
LOC409017	pantothenate kinase 4	409017	4792.48	1.32321	0.343721	3.84967	0.000118276	0.0067003	4064.51	11126.9	5353.14	2777.44	2392.3	3040.56	20.6371	56.5781	25.2597	11.8867	10.8025	15.2454
LOC724322	serum response factor homolog	724322	2334.47	0.401189	0.104341	3.84496	0.000120571	0.00679196	2540.61	2735.64	2695.24	2033.75	1925.48	2076.08	7.45586	7.86111	6.70983	4.97159	4.78762	5.57487
LOC408867	alpha,alpha-trehalose-phosphate synthase [UDP-forming]	408867	7287.63	1.40399	0.36562	3.84004	0.000123015	0.00689089	5025.47	16343.1	10365.9	3294.63	4590.54	4106.18	10.929	37.533	23.0153	5.93126	8.33198	7.64163
LOC727028	uncharacterized LOC727028	727028	492.658	2.16719	0.564587	3.83854	0.000123767	0.00689454	305.09	1527.04	585.783	124.92	143.387	269.727	1.97198	9.46466	3.43067	0.712817	0.830954	1.83831
LOC551566	uncharacterized LOC551566	551566	2197.77	0.517372	0.135057	3.83077	0.000127745	0.00703788	2424.46	2805.47	2533.06	1946.19	1632.24	1845.18	3.44275	3.97466	3.25049	2.48991	2.21779	2.71679
LOC725131	microtubule-associated protein futsch	725131	542.097	-2.36493	0.617288	-3.83117	0.000127536	0.00703788	205.2	212.296	110.968	1647.31	877.572	199.23	0.141404	0.124704	0.0663497	0.580769	0.360131	0.12155
LOC410235	toll-like receptor Tollo	410235	534.931	1.17384	0.306631	3.82818	0.000129096	0.00707349	631.087	843.597	749.034	435.47	209.151	341.245	1.95651	2.51458	2.08333	1.07944	0.596501	1.05024
LOC408953	peroxidase	408953	16664.7	0.992549	0.259685	3.82213	0.000132304	0.00717087	15586.7	30325.7	20631.5	11106.2	13172.2	9165.6	46.3341	85.1107	54.3736	28.3134	35.8583	26.4552
LOC550808	WD repeat-containing protein 75	550808	5368.97	1.58799	0.416034	3.81698	0.000135094	0.0072005	3333.53	12354.1	8485.86	2034.92	2380.44	3624.97	6.76541	5.86062	7.03998	6.59202	6.34474	6.33269
LOC727166	acyl-CoA Delta(11) desaturase	727166	16383.7	1.07502	0.281694	3.81627	0.000135486	0.0072005	20718.2	23879.6	22062.4	15784.3	8693.78	7164.11	52.3539	53.0831	42.0354	39.618	22.3597	24.0857
LOC408311	catenin delta-2	408311	12959.6	0.425189	0.111341	3.8188	0.000134101	0.0072005	13331	15579.5	15657.2	11124.9	11312.5	10752.3	28.841	31.9761	26.8489	18.2281	19.134	20.4571
LOC725309	keratin-associated protein 19-2	725309	8480.77	1.23385	0.32335	3.81584	0.000135723	0.0072005	9567.74	17723.9	8412.23	4685.1	6772.61	3723.05	272.777	485.806	226.654	115.123	177.213	104.602
LOC413440	protein kibra	413440	5680.2	0.510099	0.133805	3.81224	0.000137712	0.00722931	5789.74	6961.07	7272.68	4538	4561.43	4958.27	8.12138	9.25223	8.61681	5.63519	4.88054	6.58107
LOC411277	uncharacterized LOC411277	411277	16134.3	0.59069	0.154937	3.81245	0.000137597	0.00722931	15868.5	19809.6	22498.8	13067.6	12845.5	12716	24.3316	27.8514	31.51	20.5356	18.3314	22.1491
LOC409650	solute carrier organic anion transporter family member 2A1	409650	19320.5	3.19134	0.83741	3.81096	0.000138429	0.00722931	11161.3	62000.6	31322.9	865.103	4716.68	5856.34	41.1199	217.204	105.096	2.81537	15.8703	21.6884
LOC412916	ETS-like protein pointed	412916	5512.98	0.420679	0.110597	3.80369	0.000142554	0.00740618	6089.41	6071.85	6772.25	4997.98	4710.21	4436.19	6.90183	7.83865	5.81293	4.9119	3.71722	4.47073
LOC724150	B-cell lymphoma/leukemia 11B	724150	680.324	1.72908	0.455681	3.79449	0.000147948	0.00764679	467.701	1256.08	1412.71	182.127	334.21	429.111	0.857639	2.30358	2.45512	0.303561	0.553521	0.770139
LOC100577164	uncharacterized LOC100577164	100577164	99.0626	2.71316	0.715362	3.79271	0.000149012	0.00766227	53.4295	297.028	165.385	14.0098	42.0458	22.4772	0.101554	0.498966	0.315991	0.0143971	0.0840077	0.0443794
LOC725562	uncharacterized LOC725562	725562	211.119	1.02217	0.269736	3.78951	0.000150946	0.00772213	250.112	288.648	310.497	126.088	120.747	170.623	1.41779	1.57167	1.47126	0.595705	0.597525	0.926756
LOC100576667	E3 ubiquitin-protein ligase synoviolin A	100576667	9503.48	-0.339309	0.0897583	-3.78025	0.000156668	0.00793746	8153.8	8416.41	8603.23	11141.3	10281.8	10424.3	48.7323	48.3701	47.041	58.3912	56.7188	61.7337
LOC410350	angio-associated migratory cell protein	410350	2686.75	-0.382498	0.101186	-3.78014	0.000156739	0.00793746	2347.8	2382.74	2267.38	2968.9	2949.68	3204.03	24.6121	23.6344	21.5688	26.8502	28.6499	32.802
LOC107964603	uncharacterized LOC107964603	107964603	916.681	0.724228	0.191654	3.77883	0.000157565	0.00793921	1043.04	1353.85	1029.66	604.755	714.779	754.009	4.62304	5.91977	4.22931	2.49952	2.90029	3.33737
LOC412777	sodium/potassium/calcium exchanger Nckx30C	412777	215.343	1.2633	0.334894	3.77224	0.000161789	0.00811128	406.528	297.028	208.065	140.098	121.825	118.516	0.365189	0.276882	0.176671	0.122972	0.0797238	0.115276
LOC102654517	uncharacterized LOC102654517	102654517	56026.9	-0.426228	0.113214	-3.76479	0.000166689	0.00831537	52346.2	47007.7	44075.7	64050.3	60992.3	67689.2	15.8714	7.59732	11.2198	4.13502	8.26808	9.4342
LOC410877	cysteine-rich with EGF-like domain protein 2	410877	3525.39	-0.403937	0.107813	-3.74664	0.000179216	0.00874462	3072.58	3154.64	2877.7	3873.7	3889.78	4283.96	41.1486	40.3132	35.2185	45.3503	47.8263	56.5727
LOC408803	tensin-1	408803	3593.35	0.496095	0.132379	3.74753	0.000178584	0.00874462	4125.68	4515.94	3973.51	3182.55	2637.03	3125.36	24.4885	25.8264	21.5538	17.7201	16.0587	20.1317
LOC552672	proclotting enzyme	552672	642.581	-1.73568	0.463337	-3.74603	0.000179654	0.00874462	192.811	216.02	482.284	489.174	1281.86	1193.34	1.47735	1.58035	3.47927	3.52501	9.66145	9.66009
LOC413984	serine-rich adhesin for platelets	413984	2031.19	1.09058	0.291945	3.73556	0.000187296	0.00902892	1661.73	2944.21	3687.55	1417.32	1108.28	1368.05	8.94384	10.5591	12.3592	7.72167	8.24479	8.05119
LOC551028	cytochrome P450 6a14-like	551028	2824.02	2.61911	0.701691	3.73257	0.00018954	0.00905007	1726	8395.93	4450.46	431.968	968.132	971.63	14.9709	68.8824	34.5826	3.21712	7.72161	8.17323
LOC551478	mediator of RNA polymerase II transcription subunit 15	551478	2497.97	-0.40456	0.108369	-3.73315	0.000189098	0.00905007	2089.17	2047.54	2314.32	2854.49	2805.21	2877.09	15.4032	14.4297	15.8597	19.0565	19.7754	22.173
LOC100576397	uncharacterized LOC100576397	100576397	679.404	-0.752184	0.201905	-3.72543	0.000194981	0.00905128	496.352	519.566	502.557	867.438	1008.02	682.491	2.4498	2.33044	2.27752	3.67907	4.72167	3.32496
Mblk-1	transcription factor mblk-1-like	408521	31092	-0.572413	0.153535	-3.72822	0.000192835	0.00905128	29237.5	23359.1	22412.3	38129.9	40215.2	33197.9	16.522	12.388	11.002	18.6267	20.9169	18.7258
LOC552512	kinesin 3E	552512	3963.48	0.511337	0.137213	3.72659	0.000194086	0.00905128	4094.71	5038.3	4843.12	3549.14	3159.91	3095.73	9.07893	11.5049	10.9821	7.58055	7.01025	7.81288
LOC726703	venom acid phosphatase Acph-1	726703	489.3	2.25263	0.604197	3.7283	0.000192773	0.00905128	291.926	1119.21	1015.78	54.8716	241.494	212.512	3.59618	12.6003	11.1457	0.396964	2.95678	2.7165
LOC412893	hemicentin-2	412893	2475.92	0.977918	0.262387	3.72701	0.000193761	0.00905128	2415.17	3863.23	3575.52	1269.05	1568.63	2163.94	2.3305	3.25247	1.33229	1.61276	1.29163	1.31985
LOC102654390	uncharacterized LOC102654390	102654390	668.923	-0.737591	0.198418	-3.71736	0.000201319	0.00930243	579.981	477.666	446.006	944.491	725.56	839.831	10.128	7.21746	5.88416	14.5344	11.5924	14.3489
LOC413473	GTPase-activating Rap/Ran-GAP domain-like protein 3	413473	1482.76	0.706502	0.190794	3.70296	0.0002131	0.00975688	1661.73	2120.16	1733.88	1349.61	1016.65	1014.54	4.87284	6.00426	4.51486	3.47926	2.75917	2.90464
LOC100576326	phenoloxidase-activating factor 2	100576326	118272	-0.640762	0.172996	-3.70392	0.000212292	0.00975688	98736.9	105228	73326.4	140382	159735	132224	1154.05	1165.68	783.025	1416.72	1705.03	1524.04
LOC408272	monocarboxylate transporter 7	408272	35264.3	0.877598	0.237076	3.70176	0.000214111	0.0097586	32695	61375.8	42942.5	27826.9	24705.7	22040	186.684	371.905	233.774	139.952	132.488	123.364
LOC102655619	uncharacterized LOC102655619	102655619	411.773	0.877956	0.237278	3.70012	0.000215497	0.00977734	477.768	597.78	524.964	225.324	334.21	310.595	0.779165	0.950371	0.730501	0.311279	0.51261	0.495507
LOC724876	SET and MYND domain-containing protein 4	724876	592.264	-0.809483	0.218889	-3.69814	0.000217184	0.0098095	472.347	380.829	437.47	869.773	597.266	795.899	2.35535	1.96294	2.07991	4.4553	3.26624	4.65512
LOC726210	myogenesis-regulating glycosidase	726210	169650	0.542528	0.146751	3.69692	0.00021823	0.00981254	215058	220526	167949	149371	132199	132799	926.117	873.988	663.334	601.251	573.245	620.637
LOC726393	capa receptor-like GPCR	726393	1632.67	3.5354	0.957858	3.69095	0.000223421	0.00995726	780.535	5077.41	3160.46	64.2114	337.445	375.983	4.70718	26.9432	18.7131	0.455405	1.81813	2.26938
LOC726871	synaptic vesicle glycoprotein 2B	726871	23855.3	3.0783	0.834016	3.69093	0.000223435	0.00995726	10010.7	65475.6	52493.2	2310.44	5800.17	7041.51	61.5444	421.936	311.041	11.6886	31.2416	41.3551
LOC100576446	solute carrier family 26 member 6	100576446	1496.76	2.86948	0.779394	3.68169	0.000231697	0.0102798	748.787	3948.89	3202.07	166.95	516.409	397.438	4.08977	20.9558	15.4476	0.550849	2.30569	1.98781
Gr10	gustatory receptor 10	725297	4828.65	0.473043	0.128772	3.6735	0.000239251	0.0105482	5593.83	5486.17	5760.74	3531.63	4158.22	4441.3	22.9113	20.5439	21.3944	13.1725	16.6247	19.4116
LOC725220	homeobox protein Nkx-6.1	725220	964.955	0.882934	0.240454	3.67195	0.000240711	0.0105482	1089.5	1166.7	1498.07	672.469	840.916	522.085	1.53901	1.67863	2.19136	0.63771	1.02039	0.616343
LOC725527	cytochrome b-c1 complex subunit Rieske, mitochondrial	725527	5798.36	1.43288	0.390246	3.67174	0.000240904	0.0105482	4338.63	14829	6219.55	2884.84	3275.26	3242.85	2.83714	2.1422	2.30857	2.4853	3.50037	2.39593
LOC409429	meiosis regulator and mRNA stability factor 1	409429	1687.06	0.544094	0.14828	3.66936	0.000243159	0.0106007	1777.88	1965.6	2262.04	1343.77	1312.05	1461.02	3.55481	3.82517	4.30193	2.4668	2.68728	3.14544
LOC410254	glutaryl-CoA dehydrogenase, mitochondrial	410254	557.505	1.95853	0.534143	3.66667	0.000245733	0.0106665	315.156	1518.66	826.926	136.595	313.727	233.968	2.69053	13.2874	5.52034	0.357371	1.97742	1.72377
LOC726447	histone H2B	726447	879.994	-0.690268	0.188665	-3.6587	0.000253502	0.0109093	558.299	784.936	677.545	1099.77	1163.27	996.15	22.0776	29.0725	25.4368	37.9993	42.0307	38.4998
LOC725473	cell division cycle protein 123 homolog	725473	4070.07	-0.807092	0.221403	-3.64536	0.000267019	0.0113932	3331.98	3370.66	2177.75	4237.95	5802.32	5499.77	22.1186	18.1116	13.8374	19.6295	21.0782	24.1514
LOC408429	tensin-1	408429	99878.2	0.436637	0.120178	3.63326	0.000279866	0.0118506	100791	119449	124395	87735	82626.5	84272.3	164.488	191.885	183.951	118.936	113.497	128.293
LOC724558	uncharacterized LOC724558	724558	2842.47	0.517408	0.14246	3.63195	0.000281286	0.0118506	3020.7	3309.21	3711.03	2380.49	2519.52	2113.88	28.7554	29.9322	37.472	21.0512	25.1612	21.4477
LOC100576640	uncharacterized LOC100576640	100576640	1079.95	0.522923	0.143965	3.63229	0.000280919	0.0118506	1286.95	1346.4	1186.5	974.846	863.557	821.441	2.36321	2.48314	2.12609	1.46099	1.40667	1.50416
LOC102655153	facilitated trehalose transporter Tret1-like	102655153	31.1891	-5.49926	1.51491	-3.6301	0.00028331	0.0118768	0	0	4.268	7.00488	119.669	56.1931	0	0	0.0347737	0.035345	1.09798	0.568283
LOC726423	transient receptor potential cation channel protein painless	726423	2542.14	-0.419605	0.115653	-3.62815	0.000285459	0.0118768	2149.57	2014.95	2361.27	2982.91	2854.8	2889.35	11.6676	10.2806	11.7394	13.6957	13.9409	15.4033
LOC408901	actin-related protein 2/3 complex subunit 1A	408901	9111.86	-0.37333	0.102884	-3.62866	0.000284892	0.0118768	8163.09	7888.47	7765.63	10984.8	10355.1	9514	111.756	103.056	97.1447	129.323	130.452	129.308
LOC408420	RING finger protein nhl-1	408420	106255	0.63247	0.174915	3.61587	0.000299341	0.0123518	130596	155307	101635	84325.9	78990.1	86674.3	298.572	344.881	210.019	161.356	158.048	189.452
LOC410535	protein lozenge	410535	1387.9	0.719559	0.198976	3.61631	0.000298836	0.0123518	1461.95	2145.31	1573.83	1060.07	1132	954.261	4.87554	7.75553	5.23583	3.34103	3.5498	3.25364
LOC412630	scavenger receptor class B member 1	412630	272.004	-2.14948	0.594719	-3.61427	0.00030119	0.0123772	51.1064	66.1097	183.524	612.927	529.346	189.013	0.454511	0.448779	1.2802	4.2595	3.95366	1.62105
LOC100578727	uncharacterized LOC100578727	100578727	323.928	-0.92232	0.255577	-3.60877	0.000307652	0.01254	192.811	203.916	275.286	462.322	352.538	456.697	0.735586	0.755665	0.952985	1.52326	1.21262	1.67602
LOC551279	zinc finger CCCH domain-containing protein 11A	551279	8164.44	-0.358809	0.099425	-3.60884	0.000307572	0.01254	7406.56	7175.23	6880.02	9513.8	9444.14	8566.89	5.33721	7.916	6.97325	6.05031	4.93442	6.32729
LOC726697	coiled-coil domain-containing protein 137	726697	43097.6	0.807058	0.22401	3.60277	0.00031484	0.0127251	46028.3	74673.2	43840.9	30095.3	29669.3	34278.8	16.542	28.2908	14.3889	9.40728	10.1179	9.45215
LOC409288	tribbles homolog 2	409288	6011.96	0.518704	0.144035	3.60125	0.000316697	0.0127251	6107.99	7668.72	7467.94	4958.29	4516.15	5352.65	38.8485	47.5917	42.1628	27.7487	26.1589	33.6855
LOC100578193	uncharacterized LOC100578193	100578193	96.1289	2.55472	0.709531	3.60057	0.000317519	0.0127251	121.571	314.719	56.551	24.5171	42.0458	17.3688	2.13669	5.76319	0.959251	0.258914	0.752705	0.260246
LOC102655655	uncharacterized LOC102655655	102655655	385.304	-0.996541	0.276645	-3.60224	0.000315491	0.0127251	221.461	321.237	229.405	389.938	573.548	576.235	0.825834	1.10148	0.582604	1.11942	1.80021	1.54684
LOC724976	WD repeat-containing protein 26	724976	3019.93	0.37228	0.103419	3.59974	0.000318541	0.0127251	3225.13	3604.37	3393.06	2698.05	2570.19	2628.82	9.83798	11.6504	10.307	6.71709	6.57654	7.5226
LOC100577002	multiple inositol polyphosphate phosphatase 1	100577002	18026.1	-0.631883	0.175642	-3.59756	0.000321219	0.0127812	15950.6	13620.5	12848.8	26694.4	19534.1	19508.2	93.6353	76.0535	67.2589	131.853	103.882	110.515
LOC102655396	uncharacterized LOC102655396	102655396	2291.76	-0.46956	0.130707	-3.59246	0.000327569	0.0129823	2105.43	1956.29	1702.93	2715.56	2684.46	2585.9	1.85359	1.30357	1.15826	2.41506	2.55178	2.97941
LOC411735	nuclear pore complex protein Nup133	411735	3405.61	1.08006	0.301254	3.58522	0.000336798	0.0132434	2861.19	6749.7	4261.6	1970.71	2050.54	2539.93	6.28871	5.44082	5.76327	5.93491	5.24117	6.46102
LOC410705	synaptic vesicle glycoprotein 2C	410705	751.456	2.14869	0.600024	3.58101	0.000342274	0.0132509	676.773	1490.73	1511.94	58.374	342.835	428.089	1.57555	6.48811	5.64135	0.105081	1.11881	1.1981
LOC725724	uncharacterized LOC725724	725724	2705.23	0.770146	0.21498	3.5824	0.000340454	0.0132509	2872.03	3665.83	3695.02	1553.92	1956.75	2487.82	12.4834	14.5168	13.3171	6.23358	8.15206	11.2625
LOC413314	neuronal cell adhesion molecule	413314	2113.9	0.560538	0.156478	3.58221	0.000340696	0.0132509	2275.01	2935.83	2347.4	1830.61	1691.54	1603.04	7.89885	9.62107	7.05579	5.37434	5.28792	5.40802
LOC551460	homeobox protein cut	551460	2092.88	1.12977	0.315491	3.58101	0.00034227	0.0132509	1859.19	4399.55	2360.21	1156.97	1333.61	1447.74	4.84079	10.6554	5.67262	2.60688	3.3509	3.80467
LOC107965335	uncharacterized LOC107965335	107965335	21193.6	0.379146	0.10595	3.57856	0.000345499	0.0133243	21983.5	25202.7	24702.1	19383.7	17785.4	18104.4	1.72401	3.26589	2.59093	1.73121	1.86019	1.9396
LOC412008	sprouty-related, EVH1 domain-containing protein 1	412008	322.891	0.942633	0.263561	3.57652	0.000348194	0.0133768	344.581	545.637	384.12	238.166	211.307	213.534	2.38621	3.53538	2.44184	1.58791	1.35462	1.50837
LOC408451	NADPH oxidase 5	408451	157.934	-1.13826	0.318641	-3.57222	0.000353965	0.0135466	89.8234	121.977	84.2931	177.457	214.542	259.51	0.206063	0.370456	0.284187	0.592715	0.70419	0.95279
LOC551170	dumpy	551170	12839.3	-0.793592	0.222266	-3.57047	0.000356346	0.0135859	9095.4	8289.78	10798	21136.1	15422.2	12294	2.40852	2.10597	2.54586	4.87702	3.77142	3.24752
LOC725334	dynein regulatory complex subunit 2	725334	75.1116	-1.81122	0.507472	-3.56909	0.000358218	0.0136055	43.363	30.727	25.608	75.8862	102.419	172.666	0.0318185	0.147413	0	0.124271	0.120594	0.666054
LOC412608	serine/threonine-protein kinase D3	412608	855.457	0.690503	0.193674	3.56528	0.000363473	0.0136915	956.31	1136.9	1075.54	790.384	599.422	574.191	4.77274	5.3072	4.70623	3.41877	2.52603	2.81903
LOC552797	ETS-related transcription factor Elf-5	552797	11337	-0.53577	0.150358	-3.56331	0.000366209	0.0136915	9825.6	8956.46	8984.15	15776.2	12866	11613.6	65.1458	58.8823	50.2047	99.045	81.9265	74.7833
LOC551461	adenylate cyclase type 2	551461	16999.3	0.422344	0.118459	3.56531	0.000363432	0.0136915	18145.9	18562.8	21701.7	15204.1	14520.9	13860.3	59.7396	58.5225	64.3161	44.1325	43.3391	45.6912
LOC413946	myocyte-specific enhancer factor 2	413946	5766.65	0.385766	0.108228	3.56439	0.00036471	0.0136915	6143.61	7046.73	6409.47	4937.27	4826.64	5236.17	6.7231	8.57868	7.37742	4.41113	3.39254	4.62467
LOC409172	xaa-Pro aminopeptidase 1	409172	6039.63	0.967357	0.271733	3.55995	0.000370924	0.013775	5484.65	11691.2	6800	4053.49	4221.83	3986.64	25.2245	53.0537	28.3866	15.7368	17.6382	18.3768
LOC552138	Mig-2-like GTPase Mtl	552138	403.216	0.6028	0.169555	3.55519	0.000377712	0.0139753	475.445	515.842	467.346	333.899	301.867	324.898	6.80663	7.11798	6.43986	4.09767	3.25433	3.91628
LOC726292	natterin-3	726292	481.578	3.6851	1.03843	3.54872	0.000387104	0.0142702	241.594	1576.39	863.204	14.0098	61.4516	132.82	8.61055	58.168	29.8643	0.420982	1.73909	4.41947
LOC726681	formin-2	726681	1946.03	2.92986	0.82632	3.54567	0.000391614	0.0143518	1114.28	6636.11	2571.47	171.62	558.455	624.254	3.57405	19.7037	7.01504	0.5033	1.63092	1.95038
LOC413730	probable cytochrome P450 301a1, mitochondrial	413730	273.337	1.78793	0.504312	3.54529	0.000392181	0.0143518	542.812	584.745	144.045	117.915	120.747	129.755	3.85837	3.98074	0.874318	0.774749	0.557334	0.922652
Cyp6as5	cytochrome P450 6AS5	409677	28958.5	-0.828296	0.234196	-3.53677	0.000405058	0.0147156	21347.8	25914.1	15337.1	42728.6	39541.4	28882.2	83.4537	101.241	44.529	192.903	183.469	132.397
LOC552459	glycine-rich cell wall structural protein	552459	179920	-1.1679	0.330175	-3.53722	0.000404363	0.0147156	139062	109027	84392.3	368935	236222	141880	739.878	555.161	424.458	1735.89	1240.56	794.61
LOC412948	delta-1-pyrroline-5-carboxylate synthase	412948	7963.8	3.35506	0.950236	3.53076	0.00041436	0.0149124	4793.16	27387.1	11348.6	339.737	2071.03	1843.13	19.274	107.509	41.6479	0.78422	7.37146	5.8614
LOC724692	protein AAR2 homolog	724692	2691.92	0.677881	0.192013	3.5304	0.000414935	0.0149124	3377.67	3119.26	3442.14	1768.73	2624.09	1819.63	14.7493	11.9921	10.3537	13.1438	12.5196	13.5438
LOC100578826	protein strawberry notch-like	100578826	2112.38	0.560007	0.158582	3.53135	0.000413451	0.0149124	2331.54	2258.9	2961.99	1816.6	1641.94	1663.32	3.31405	3.60657	3.49208	1.86713	1.75135	2.33844
LOC413980	CD109 antigen	413980	2170.65	0.397849	0.112914	3.52347	0.000425936	0.0152531	2429.88	2406.95	2567.2	1970.71	1907.16	1741.99	5.87505	5.7045	5.97965	3.78937	3.97383	3.86053
Uvop	ultraviolet-sensitive opsin	406127	7461.11	1.28911	0.367552	3.50729	0.000452691	0.0160393	5603.12	17807.7	8356.75	3947.25	4288.67	4763.13	11.026	41.3839	16.2243	6.67584	9.61033	7.62978
LOC726435	signal recognition particle subunit SRP72	726435	4266.63	-0.41499	0.118383	-3.50549	0.000455771	0.0160428	3621.59	3432.12	3918.03	5268.84	4774.9	4584.33	17.7137	16.2336	17.0748	21.737	21.1076	22.2016
LOC413368	uncharacterized LOC413368	413368	7686.66	0.549925	0.156881	3.50536	0.000455987	0.0160428	8721.39	8498.35	10183.5	6408.3	5275.13	7033.33	14.965	13.4319	16.3558	10.2337	8.51191	12.2772
LOC552567	DEAD-box helicase Dbp80	552567	2801.69	-0.506449	0.144547	-3.50369	0.000458851	0.016087	2414.39	2516.82	2012.36	3567.82	3066.11	3232.64	18.9468	18.9571	13.9568	24.224	21.9183	24.9663
LOC727648	acylamino-acid-releasing enzyme	727648	5501.88	1.27406	0.364705	3.49339	0.000476925	0.0166625	4233.32	13069.2	6052.03	2925.71	3242.92	3488.06	27.8219	84.0275	35.9098	16.2554	19.4875	22.4432
LOC100576454	protein stum	100576454	7713.41	0.685375	0.19701	3.47889	0.000503496	0.0175253	11064.5	9657.6	7812.58	6913.82	4802.93	6029.01	39.4845	32.8838	25.5048	21.0796	15.6601	21.3457
LOC100577373	uncharacterized LOC100577373	100577373	1974.08	1.31352	0.377661	3.47803	0.000505117	0.0175253	1407.75	4586.71	2451.97	1053.07	1273.23	1071.76	7.00228	37.6607	12.2037	1.78114	2.93514	3.06125
LOC413562	rho guanine nucleotide exchange factor 17	413562	16658.8	0.370736	0.106765	3.47246	0.00051572	0.0178139	19912.2	17834.7	18614.9	15396.7	13488.1	14706.2	31.4328	27.1553	25.752	19.9101	18.1817	22.1779
LOC413772	suppressor of cytokine signaling 7	413772	710.683	0.715715	0.206151	3.4718	0.000516988	0.0178139	714.716	1013.99	921.889	549.883	586.485	477.13	3.69454	4.87925	4.44396	2.5839	2.86101	2.27417
Dscam	Down syndrome cell adhesion molecule	408786	2567.2	0.495715	0.142885	3.46932	0.000521768	0.017917	2832.54	3297.1	2881.97	2196.03	2313.6	1881.96	2.38229	2.79396	2.31712	1.35727	1.38287	1.14384
LOC411465	probable cleavage and polyadenylation specificity factor subunit 2	411465	3702.54	-0.353626	0.102155	-3.46167	0.000536836	0.0181432	3380.77	3187.23	3183.93	4396.73	4106.48	3960.08	19.2062	18.0034	15.9763	22.5705	22.1671	23.7204
LOC552771	hydroxyacid oxidase 1	552771	7180.73	3.45816	0.99933	3.46048	0.000539212	0.0181432	2975.79	24739	11776.5	310.55	1618.23	1664.34	29.6519	224.292	92.1057	2.92119	14.4068	15.9481
LOC409533	annexin B9	409533	58251.8	-0.384635	0.11114	-3.46083	0.000538513	0.0181432	52071.3	52866.3	46657.8	68212.4	69013.4	60689.6	542.542	524.36	434.567	621.717	651.669	620.693
LOC102656483	uncharacterized LOC102656483	102656483	29.3155	-3.44816	0.995494	-3.46377	0.000532662	0.0181432	6.96906	6.51785	1.067	89.896	57.1392	14.3037	0	0	0	0.790111	0.164152	0.113445
LOC102656318	uncharacterized LOC102656318	102656318	34.2036	2.2688	0.654811	3.46482	0.000530585	0.0181432	44.9117	65.1785	59.752	15.1772	15.0934	5.10846	1.08277	1.26845	1.19545	0.236082	0.226446	0
LOC410353	CUGBP Elav-like family member 4	410353	1662.64	-0.684239	0.1976	-3.46274	0.000534703	0.0181432	1415.49	1124.8	1285.74	2445.87	2055.93	1647.99	2.02077	0.901507	1.14437	4.08346	3.80408	2.88028
LOC409168	26S proteasome non-ATPase regulatory subunit 13	409168	7728.13	-0.375037	0.108608	-3.45312	0.000554138	0.0185831	7255.56	6280.42	6650.62	9169.39	8388.68	8624.11	95.5879	80.1946	81.4758	106.55	101.837	113.737
LOC409950	fibrillin-1	409950	7133.45	2.91015	0.84562	3.44143	0.000578639	0.01934	3279.33	24391.7	10104.5	680.641	1860.8	2483.73	8.95226	62.9209	25.1145	1.67724	4.92268	6.89922
LOC725832	beta-1,3-glucan-binding protein 1	725832	759.136	-3.46267	1.00663	-3.43985	0.000582027	0.0193887	89.8234	243.023	45.881	1867.97	2052.7	255.423	1.13367	2.40113	0.498337	18.5124	21.2578	2.62743
LOC551128	26S proteasome regulatory subunit 4	551128	13899.3	-0.391238	0.11393	-3.43402	0.000594696	0.0197451	13238.1	11906.3	10932.5	15766.8	15358.6	16193.8	123.977	107.356	93.9474	127.811	131.786	148.898
LOC724115	phospholipase DDHD1	724115	488.933	0.856596	0.24966	3.43105	0.000601245	0.0198966	555.976	651.785	682.88	266.185	337.445	439.328	3.88772	4.34145	4.44544	1.6312	2.17864	3.27806
LOC100578816	uncharacterized LOC100578816	100578816	1982.24	-0.94981	0.277109	-3.42757	0.000609016	0.0200875	948.566	1610.84	1498.07	3446.4	2077.49	2312.09	5.76198	9.97722	9.23022	20.6829	13.2539	16.3671
LOC727271	fatty-acid amide hydrolase 2-A	727271	5932.21	-0.383453	0.112128	-3.41979	0.000626701	0.0206031	5576.8	4938.67	4928.48	7094.78	6353.23	6701.28	53.2708	45.9742	43.6746	59.2831	56.3847	64.6799
LOC410468	protein hairy	410468	13815.3	-0.615675	0.180631	-3.40846	0.000653301	0.0211791	10136.1	9374.54	13224.4	18114.6	14289.1	17752.9	64.2773	55.656	75.4719	97.5435	81.8303	108.578
LOC107965489	uncharacterized LOC107965489	107965489	196.812	1.27849	0.374802	3.41112	0.000646976	0.0211791	293.475	253.265	289.157	164.615	68.9983	111.364	3.44855	3.13307	3.15707	1.96673	0.804302	1.43591
LOC726527	protein FAM136A	726527	11217.1	-0.438731	0.128717	-3.40848	0.000653253	0.0211791	9822.5	10487.2	8262.85	12604.1	13361.9	12764	38.5172	34.0036	29.9243	36.5659	43.6918	44.835
LOC726362	4-coumarate--CoA ligase 1	726362	2682.78	2.84661	0.83516	3.40846	0.0006533	0.0211791	1463.5	6162.17	6506.57	274.358	433.395	1256.68	13.5966	53.668	53.9241	2.11169	3.84447	11.3059
LOC725662	uncharacterized LOC725662	725662	2427.08	0.604534	0.1775	3.40582	0.000659654	0.0211809	2480.99	3444.22	2859.56	2171.51	1847.86	1758.33	2.98628	3.98667	3.1452	2.23901	2.05016	2.10764
LOC107964281	uncharacterized LOC107964281	107964281	85965.4	0.296906	0.0872146	3.40432	0.00066329	0.0211809	93471.3	96768.7	94100.9	75309.5	74491.2	81650.6	0.474567	0.787391	1.57677	0.265094	0.342035	0.79954
LOC725593	dynein heavy chain 7, axonemal	725593	116.743	2.43227	0.714369	3.40478	0.000662177	0.0211809	94.4695	377.104	119.504	15.1772	62.5297	31.6725	0.136928	0.44848	0.140547	0.0169064	0.0616503	0.0373454
LOC551759	excitatory amino acid transporter 3	551759	510.191	1.16691	0.34268	3.40525	0.000661024	0.0211809	459.184	1017.72	641.267	255.678	384.881	302.421	2.27141	8.55099	4.54502	0.84158	2.20015	1.98719
CSP6	chemosensory protein 6	725103	202.778	1.11063	0.326568	3.40092	0.000671591	0.0213162	201.328	286.786	343.574	156.442	111.044	117.495	8.35401	12.7514	17.4723	6.45084	7.26838	4.9554
LOC725760	tetraspanin-2A	725760	352.184	1.89106	0.556054	3.40085	0.000671779	0.0213162	231.528	1009.34	423.599	109.743	228.557	110.343	2.27207	9.07049	3.64464	0.917813	1.88111	0.956444
LOC107964304	uncharacterized LOC107964304	107964304	645.537	1.52542	0.450021	3.38967	0.000699756	0.0221079	1043.04	1324.99	506.825	192.634	285.696	520.042	26.0921	24.584	8.76352	4.70225	7.55004	12.4916
LOC412215	chitin synthase chs-2	412215	204.447	-2.37545	0.701079	-3.38827	0.000703342	0.0221079	68.9163	72.6275	56.551	560.39	415.068	53.128	0.129155	0.17483	0.118121	1.22087	1.04155	0.135626
LOC410878	epoxide hydrolase 4	410878	203.216	1.47987	0.437064	3.38595	0.000709336	0.0222266	202.103	475.803	219.802	88.7285	95.9507	136.907	2.65518	5.2583	2.47445	1.09594	0.995123	1.4482
LOC725354	uncharacterized LOC725354	725354	866.648	0.788114	0.232866	3.38441	0.000713326	0.022282	1166.16	1282.16	843.998	742.517	533.659	631.406	3.29617	2.94013	1.8351	1.61813	1.17446	1.38407
LOC102656321	uncharacterized LOC102656321	102656321	143.315	1.47009	0.434698	3.38187	0.000719939	0.0223493	222.236	117.321	292.358	81.7236	61.4516	84.8005	1.43339	1.17848	1.92583	0.933896	0.527498	0.938808
LOC409217	guanine nucleotide exchange factor DBS	409217	3698.88	0.317671	0.0939156	3.38251	0.000718267	0.0223493	4165.95	4133.25	4014.06	3292.29	3160.98	3426.76	11.9555	12.9203	11.4009	9.36562	8.47568	11.1479
crh-BP	corticotropin releasing hormone binding protein	409372	226.942	2.7067	0.801005	3.37913	0.000727146	0.0225034	203.651	665.752	311.564	5.8374	100.263	74.5836	2.06472	6.82887	3.50058	0.0611211	0.710909	0.798637
LOC410179	uncharacterized LOC410179	410179	8367.54	0.818018	0.242734	3.37002	0.000751641	0.0231898	9317.63	14424.9	8291.66	6446.83	6800.64	4923.54	23.5379	36.6811	19.237	14.943	16.6395	12.9194
LOC102653589	uncharacterized LOC102653589	102653589	722.743	0.885619	0.26359	3.35983	0.000779904	0.0238111	912.172	976.747	925.09	340.904	653.327	528.215	2.07769	2.67918	2.4401	1.01376	1.74736	1.60248
LOC725218	growth arrest-specific protein 2	725218	1130.32	1.64732	0.49021	3.36043	0.000778207	0.0238111	615.6	3054.08	1471.39	396.943	635	608.929	2.04452	10.4613	4.50036	1.04691	1.79914	1.98015
LOC411299	Golgi resident protein GCP60	411299	5328.02	-0.284109	0.0845728	-3.35934	0.000781277	0.0238111	4704.11	4899.56	4812.17	5782.53	5777.53	5992.23	39.029	39.4303	36.181	41.466	44.2284	49.1014
LOC100578854	uncharacterized LOC100578854	100578854	1561.69	0.450898	0.13427	3.35815	0.000784666	0.023842	1681.09	1982.36	1747.75	1407.98	1265.69	1285.29	4.82215	4.15862	4.26351	3.61814	3.10595	3.60581
LOC112935903	cytochrome P450 6a14-like	112935903	19002.8	3.82074	1.13848	3.356	0.000790799	0.0239557	7234.66	81360.5	17886.1	436.638	2832.16	4266.59	0.705463	4.74084	1.41732	0.126041	0.629237	0.741852
LOC410683	sodium-coupled monocarboxylate transporter 2	410683	21026.4	0.795915	0.237293	3.35414	0.000796114	0.0240441	18048.3	35178.7	26824.4	14574.8	15086.9	16445.2	30.9298	152.422	91.4514	2.26848	14.3955	17.0678
LOC409368	interferon-related developmental regulator 1-like	409368	13238.8	-0.319947	0.0954595	-3.35165	0.000803307	0.0241885	12286.5	11922.1	11120.3	15339.5	14583.4	14181.1	51.7727	48.7333	43.7425	56.7387	58.124	59.7605
LOC552066	FAD-dependent oxidoreductase domain-containing protein 1	552066	5115.89	-0.435241	0.129907	-3.3504	0.000806957	0.0242256	4110.2	4752.45	4187.98	5355.23	5849.76	6439.73	41.5945	46.329	39.0936	46.3902	53.4894	64.0101
LOC412670	probable phosphoserine aminotransferase	412670	3429.61	-0.329038	0.0983451	-3.34575	0.000820607	0.0245619	3182.54	3047.56	2889.44	3756.95	3918.89	3782.31	35.3038	32.3717	29.7193	34.8444	40.2428	41.3948
cad	homeotic protein caudal	726676	178.386	1.78215	0.5329	3.34425	0.000825053	0.0246215	130.089	486.977	212.333	59.5415	88.404	92.974	0.999443	3.998	1.16599	0.0625299	0.303014	0.314252
LOC412884	AP-1 complex subunit gamma-1	412884	4591.38	0.491184	0.146933	3.34292	0.000829019	0.0246664	4782.32	5410.75	5903.71	4308	3609.47	3534.03	15.7731	17.9125	17.5946	11.7428	11.0559	11.24
LOC408463	uncharacterized LOC408463	408463	108192	0.586577	0.17552	3.34194	0.000831941	0.0246801	107619	131813	150232	100813	78932.9	79739	357.255	400.777	436.706	297.091	251.077	274.095
LOC100577135	protein amnionless	100577135	533.31	-1.39101	0.417172	-3.33438	0.000854899	0.0250645	383.298	327.755	171.787	422.628	843.073	1051.32	0.148848	0.201027	0.539813	0.355184	0.783783	0.194678
LOC724358	neuroligin 1	724358	2701.02	0.482951	0.144784	3.33566	0.000850975	0.0250645	3108.97	3577.37	2760.33	2127.15	2283.41	2348.87	8.2588	8.75826	6.41841	4.90332	5.61491	6.13659
LOC102655983	sodium-independent sulfate anion transporter	102655983	3723.68	0.801043	0.240207	3.3348	0.00085361	0.0250645	3355.21	6334.42	4505.94	2512.42	2684.46	2949.63	8.83315	25.2101	15.2781	5.1638	4.0635	5.90804
LOC551275	T-complex protein 1 subunit delta	551275	10644.5	-0.364167	0.10937	-3.32968	0.000869456	0.0252865	9732.68	9414.57	8776.08	12625.1	11005.2	12313.4	86.5066	80.6881	70.325	97.6646	89.3569	108.952
LOC410060	potassium voltage-gated channel protein Shab	410060	3663.25	0.469225	0.14093	3.3295	0.000870034	0.0252865	4255.77	4168.63	4336.29	3564.32	2762.09	2892.41	8.82349	8.98474	8.14675	6.42892	5.03589	5.72687
LOC107965795	lactosylceramide 4-alpha-galactosyltransferase	107965795	58.4056	2.37843	0.714309	3.3297	0.0008694	0.0252865	50.3321	172.258	71.489	8.17236	22.6401	25.5423	0.351374	0.959309	0.326929	0	0.19544	0.16857
LOC113218716	protein C19orf12 homolog	113218716	1510.88	-0.5642	0.169513	-3.32837	0.00087357	0.0253158	1448.02	1135.97	1072.34	1680	1851.09	1877.87	45.9233	31.5724	28.4675	45.0427	51.2875	56.0439
LOC412203	protein brown	412203	997.959	3.8672	1.16469	3.32037	0.000898992	0.0257953	754.981	4508.49	340.373	33.8569	148.778	201.273	5.77084	32.8744	2.27386	0.204969	1.13742	1.50056
LOC100578519	uncharacterized protein PF11_0207	100578519	1985.23	0.639843	0.192787	3.31891	0.000903702	0.0257953	2188.28	2128.54	2938.52	1767.56	1525.51	1362.94	9.13332	8.45477	11.2253	6.39488	5.70363	5.54281
LOC725588	uncharacterized LOC725588	725588	12022.9	0.579359	0.174565	3.31887	0.000903838	0.0257953	15728.4	16283.5	11202.4	9713.43	9013.98	10195.5	22.6852	22.4686	14.4113	12.2993	12.1187	14.8535
LOC412471	activin receptor type-2A	412471	242.949	0.974515	0.293676	3.31834	0.000905551	0.0257953	243.143	344.515	378.785	171.62	133.684	185.948	1.77772	2.62192	2.59828	1.18779	0.823906	1.21388
LOC725795	INO80 complex subunit D	725795	1214.3	0.496695	0.149551	3.32125	0.000896157	0.0257953	1277.66	1415.31	1571.69	976.013	1087.8	957.326	8.06683	7.73802	8.74975	5.17186	5.78442	6.23942
LOC411202	1,5-anhydro-D-fructose reductase	411202	793.507	-0.846996	0.255393	-3.31645	0.000911701	0.025897	611.729	537.257	551.639	1243.37	1122.3	694.751	9.37896	7.97759	7.59951	16.7216	15.352	10.4839
LOC107964762	transcription activator MSS11	107964762	1170.26	1.23237	0.372052	3.31235	0.000925153	0.0262048	905.978	1328.71	2690.98	744.852	689.983	661.035	4.09162	6.01605	11.0405	2.98922	2.83979	3.0202
LOC412025	very long-chain specific acyl-CoA dehydrogenase, mitochondrial	412025	8471.39	-0.267374	0.080762	-3.31064	0.000930838	0.0262916	7676.03	7748.8	7640.79	9488.11	8994.57	9280.03	58.1437	57.2556	53.6285	64.4857	65.6093	70.9366
LOC113219393	uncharacterized LOC113219393	113219393	89.8838	-1.67825	0.507979	-3.30378	0.000953902	0.0268674	31.7479	45.625	51.216	176.289	164.949	69.4751	0.359529	0.378588	0.460982	1.74464	1.65162	0.726969
LOC725928	dedicator of cytokinesis protein 3	725928	9381.47	0.303547	0.0919996	3.29944	0.000968793	0.0271191	9844.96	10776.8	10473.7	8108.15	8504.04	8581.2	22.544	24.1103	21.5709	16.2809	17.4251	19.701
LOC113218710	uncharacterized LOC113218710	113218710	32.0272	3.16365	0.959027	3.29881	0.000970953	0.0271191	13.1638	89.3877	70.422	2.33496	9.70288	7.15185	2.8846	14.5408	7.6422	0	7.06738	0
LOC412810	V-type proton ATPase 116 kDa subunit a	412810	10253.7	2.11583	0.641383	3.29886	0.000970799	0.0271191	6798.7	31101.3	12089.1	3542.13	3949.07	4041.82	31.8247	147.234	50.982	15.0451	15.1366	17.5449
LOC113218980	uncharacterized LOC113218980	113218980	6927.76	-0.602499	0.18292	-3.29378	0.000988482	0.0274557	5290.29	6270.18	4944.48	9358.52	9074.35	6628.74	22.7758	25.4589	18.6696	34.5468	34.7647	28.0604
LOC408986	proteasome subunit alpha type-3	408986	12721.5	-0.314985	0.0956534	-3.29298	0.000991323	0.0274586	11931	11542.2	10539.8	14279.4	13962.4	14073.8	223.092	208.371	178.711	232.506	237.87	262.724
LOC409020	inaD-like protein	409020	33350.7	0.462297	0.140639	3.28711	0.00101221	0.0279599	38631.8	43956.4	33357.6	28898.6	29184.1	26075.6	40.5933	44.5184	32.1053	26.4466	27.4394	26.7512
LOC412284	UPF0518 protein AAEL005291	412284	1860.71	0.47798	0.145582	3.28322	0.00102627	0.0282703	2000.12	2233.76	2265.24	1588.94	1364.87	1711.34	8.70895	9.29738	8.84744	5.8925	5.3523	7.19607
LOC726669	uncharacterized LOC726669	726669	328.283	-0.779328	0.237434	-3.28229	0.00102966	0.0282861	258.63	251.403	214.467	481.002	429.083	335.115	1.32523	1.4388	0.344023	6.10725	4.23044	3.18657
LOC411083	sodium/potassium-transporting ATPase subunit alpha	411083	60708.6	-0.460494	0.140345	-3.28116	0.00103383	0.0283229	59786.8	44803.7	48711.8	72124.6	69250.5	69574.2	81.2339	52.4571	51.0553	96.7476	95.291	99.9433
Mrjp4	major royal jelly protein 4	406133	339.205	-2.00087	0.610271	-3.27867	0.00104299	0.028496	132.412	129.426	145.112	385.268	148.778	1094.23	0.348516	0.235416	0.260456	0.189027	0.403658	2.01364
LOC102656787	uncharacterized LOC102656787	102656787	19571.8	0.387899	0.118349	3.27759	0.00104698	0.0285273	22329.6	23544.4	20687	18310.8	15388.8	17170.6	18.6531	6.84105	2.19726	3.13711	7.89756	13.1814
LOC102654579	uncharacterized LOC102654579	102654579	197.314	-0.970301	0.296263	-3.27513	0.00105613	0.0286988	119.248	121.046	160.05	319.89	250.119	213.534	0.299992	0.202134	0.323486	0.71847	0.336805	0.392717
LOC408331	histone deacetylase 5	408331	27004.4	0.574097	0.175352	3.27396	0.0010605	0.0287396	26233.1	30679.5	40011.5	21294.8	22176.5	21631.3	76.7188	83.3371	103.631	54.7841	60.259	63.7086
LOC107965122	uncharacterized LOC107965122	107965122	29.3354	2.82517	0.863829	3.27052	0.00107348	0.029013	27.1019	79.1454	48.015	4.66992	14.0153	3.06508	0.132199	0.327785	0.265561	0.0245763	0.0716198	0.024694
LOC726302	alpha-protein kinase 1	726302	4344.18	0.722373	0.221125	3.26681	0.00108765	0.0290823	4863.63	6976.9	4388.57	2777.44	3254.78	3803.76	8.73854	12.106	6.54344	3.97979	4.9319	5.7922
LOC113218739	uncharacterized LOC113218739	113218739	135.114	2.0886	0.63932	3.26692	0.00108726	0.0290823	70.4649	173.189	412.929	45.5317	44.202	64.3666	0.94994	2.29785	5.30564	0.537864	0.521561	0.810868
LOC107964843	uncharacterized LOC107964843	107964843	546.991	-1.46358	0.447986	-3.26702	0.00108687	0.0290823	319.802	318.444	234.74	1207.17	884.04	317.746	1.8142	2.74126	0.170434	1.67699	2.3374	3.60624
LOC412092	myosin heavy chain, non-muscle	412092	5284.02	0.348327	0.106564	3.26871	0.00108038	0.0290823	6098.7	6178.93	5477.98	4767.99	4424.51	4755.98	4.32535	5.36639	5.10033	3.19563	2.48257	3.03548
LOC413987	polypeptide N-acetylgalactosaminyltransferase 5	413987	8185.77	0.295529	0.0905065	3.26528	0.00109357	0.0291628	8815.86	8814	9434.42	7572.28	7101.43	7376.62	35.5752	33.5276	34.0563	25.9482	26.5407	28.6645
NLG-3	neuroligin 3	409003	1049.78	0.562869	0.172835	3.25669	0.00112721	0.0299802	1327.99	1382.72	1044.59	893.122	784.855	865.374	4.43779	4.52971	3.07827	2.42443	2.22553	2.34188
LOC410095	proteasome subunit alpha type-7-1	410095	9957.22	-0.419893	0.129245	-3.24881	0.00115888	0.0307409	9518.19	8589.6	7445.53	11637.4	11027.9	11524.7	179.293	156.37	128.543	191.46	191.401	217.868
Def2	defensin 2	413397	114.246	-3.31992	1.02238	-3.24724	0.00116529	0.0308296	6.96906	36.3138	19.206	414.455	197.292	11.2386	0.119161	1.11154	0	11.2015	2.84893	0.156502
LOC726886	uncharacterized LOC726886	726886	4248.4	0.567804	0.175118	3.24242	0.0011852	0.0312737	5995.71	4936.81	4288.28	3280.62	3116.78	3872.21	21.4986	17.3165	13.1587	9.80041	9.15837	11.803
LOC113219166	uncharacterized LOC113219166	113219166	492.338	1.04279	0.322077	3.23772	0.00120491	0.0316273	979.54	524.222	484.418	346.742	292.165	326.942	0.277076	0.427087	0.407638	0.194076	0.170728	0.37139
LOC724417	uncharacterized protein CG43867	724417	1949.43	0.583148	0.180096	3.23798	0.00120377	0.0316273	1832.86	2582	2600.28	1600.62	1569.71	1511.08	3.41759	4.66742	4.77837	2.37622	2.24879	2.11117
LOC107963970	uncharacterized LOC107963970	107963970	33311.3	-3.91675	1.21059	-3.2354	0.00121471	0.0318013	5318.17	5847.45	1246.26	103631	79924.8	3899.8	72.2709	73.9997	14.5327	1228.57	991.414	51.8356
LOC551753	RNA polymerase II-associated protein 1	551753	2142.26	0.590286	0.182688	3.23111	0.00123311	0.0321988	2200.67	3187.23	2335.66	1767.56	1719.57	1642.88	7.95481	11.082	7.76358	5.70766	5.96663	6.0847
LOC100576801	malate dehydrogenase, cytoplasmic	100576801	5745.72	0.954677	0.295921	3.22612	0.00125479	0.0325953	4652.23	11259.1	6829.87	3921.57	3683.86	4127.64	1.30287	0.925013	0.907595	1.18777	0.658057	0.626026
LOC412162	armadillo repeat-containing protein gudu	412162	325.215	-4.66451	1.44777	-3.22186	0.00127362	0.0329989	6.19472	39.1071	28.809	987.688	11.8591	877.634	0.0348639	0.141177	0.178214	5.51466	0.0661118	5.74847
LOC412007	facilitated trehalose transporter Tret1	412007	3000.21	2.40248	0.746033	3.22034	0.00128038	0.0330263	1394.59	8776.76	4966.89	598.917	1036.05	1228.07	15.8471	90.639	47.9892	5.83114	10.2589	13.3011
LOC726335	protein CBFA2T2	726335	9042.72	0.372062	0.115545	3.22006	0.00128166	0.0330263	9331.57	10812.2	10464.1	7580.45	8472.77	7595.26	30.0168	32.3912	29.7042	19.8271	22.4204	21.9196
LOC551401	cytosolic 10-formyltetrahydrofolate dehydrogenase	551401	8520.11	3.37176	1.04754	3.21874	0.00128754	0.0330263	4136.52	33858.4	8622.43	262.683	1983.7	2256.92	22.465	171.925	42.0364	1.18525	9.70631	12.1641
LOC113219020	uncharacterized LOC113219020	113219020	42.0619	3.6367	1.12988	3.21867	0.00128785	0.0330263	20.9072	106.148	106.7	0	4.31239	14.3037	0.0876496	0.394132	0.335466	0	0.0123161	0.038187
LOC100578446	pituitary homeobox x	100578446	1026.32	3.53719	1.1008	3.2133	0.00131219	0.0334033	747.238	3572.72	1349.76	21.0146	142.309	324.898	1.6088	8.48489	2.39166	0.0152824	0.153798	0.610193
LOC552215	uncharacterized LOC552215	552215	544.317	2.15154	0.670021	3.21116	0.00132201	0.033559	267.147	1825.93	572.979	81.7236	314.805	203.317	25.5997	109.579	36.3041	6.37072	13.8631	11.8395
LOC726948	suppressor of lurcher protein 1	726948	26784.3	2.40351	0.748877	3.20949	0.00132972	0.0336694	12064.2	77676.1	45420.1	3329.65	11095.8	11120.1	1.11474	1.57342	0.766864	0.41869	0.586537	0.45375
LOC102655167	uncharacterized LOC102655167	102655167	31.4986	3.36387	1.0492	3.20613	0.00134533	0.033979	45.6861	89.3877	37.345	0	4.31239	12.2603	0.159709	0.296532	0.116382	0	0.0143941	0.0297588
LOC552221	F-BAR domain only protein 2	552221	1827.12	0.471021	0.14705	3.20314	0.00135937	0.0341385	1928.88	2098.75	2341	1697.52	1427.4	1469.19	4.26528	5.20542	5.3526	3.42799	3.03611	3.50394
LOC411047	intraflagellar transport protein 88 homolog	411047	9347.81	1.92134	0.600064	3.2019	0.00136527	0.0341385	5333.65	25712.9	13325.8	3044.79	4445	4224.7	4.94098	5.3005	5.35119	3.83727	3.11784	4.3641
LOC409077	aminopeptidase N	409077	67.0364	-1.18113	0.368734	-3.20319	0.00135913	0.0341385	41.8144	42.8316	38.412	81.7236	102.419	95.0174	0.162819	0.188339	0.189047	0.327409	0.430433	0.464417
SIFR	SIFamide receptor	413211	609.223	0.934982	0.291975	3.20226	0.00136352	0.0341385	741.043	1075.45	583.649	359.584	382.725	512.89	3.45306	5.73658	2.84627	1.94004	3.13464	2.17461
LOC113218862	uncharacterized LOC113218862	113218862	85.8782	1.35134	0.422242	3.2004	0.00137239	0.0342311	112.279	96.8367	161.117	58.374	35.5772	51.0846	1.11958	1.04158	1.59362	0.560542	0.362726	0.56329
LOC409671	beta-catenin-like protein 1	409671	2591.13	-0.316986	0.0991463	-3.19716	0.00138789	0.034532	2251.78	2241.21	2430.63	2887.18	2893.62	2842.35	15.6338	14.4378	15.4662	16.9603	18.4733	19.4846
LOC100578530	E3 SUMO-protein ligase NSE2	100578530	1795.31	0.485099	0.15201	3.19122	0.00141673	0.0351137	2214.61	2137.86	1930.2	1515.39	1301.26	1672.51	5.58139	4.25507	4.72389	5.05531	5.03171	6.54332
LOC100576288	uncharacterized LOC100576288	100576288	1678.74	0.464217	0.145485	3.19081	0.00141874	0.0351137	2203.77	1919.97	1714.67	1430.16	1431.71	1372.13	16.2968	14.2231	8.69939	7.46431	7.86678	7.15784
LOC100578631	uncharacterized LOC100578631	100578631	2974.14	0.584845	0.183475	3.1876	0.00143458	0.0351137	3925.9	3977.75	2801.94	2472.72	2528.14	2138.4	14.3873	13.9014	9.16732	7.53879	8.29449	7.49015
LOC107965005	keratin-associated protein 19-2	107965005	23231.4	-0.985446	0.309168	-3.18741	0.00143554	0.0351137	21522	10637.1	14615.8	43268	24913.8	24431.7	674.865	291.596	395.311	1145.1	693.947	770.357
LOC410190	tyrosine-protein kinase Dnt	410190	2291.8	-1.19945	0.376314	-3.18736	0.00143578	0.0351137	1692.71	1165.76	1312.41	4873.06	1521.2	3185.64	10.2636	6.7177	6.77092	27.2645	8.31594	20.6542
LOC725008	protein trapped in endoderm-1	725008	28.0942	4.20994	1.32124	3.18636	0.00144077	0.0351498	57.3012	71.6964	30.943	0	8.62478	0	0.480377	0.497269	0.16801	0	0.0370656	0
LOC408536	angiotensin-converting enzyme	408536	2305.94	-2.79872	0.878742	-3.18492	0.00144797	0.0352397	532.746	672.27	533.5	6470.17	5047.65	579.3	2.08946	2.78017	1.93637	24.0096	19.6962	2.41481
LOC724835	uncharacterized LOC724835	724835	1860.63	1.05037	0.33005	3.18245	0.00146033	0.0353689	1396.91	3773.84	2358.07	1295.9	1160.03	1179.03	3.78314	10.1953	5.34567	2.68335	2.71638	3.0312
LOC408670	Down syndrome cell adhesion molecule-like protein Dscam2	408670	1592.51	0.4738	0.14886	3.18284	0.00145836	0.0353689	1976.12	1774.72	1803.23	1471.02	1371.34	1158.6	3.67474	2.9463	2.84268	2.20834	2.14564	1.77797
LOC411677	mitochondrial pyruvate carrier 1	411677	2749.59	-0.515254	0.162175	-3.17715	0.00148732	0.0359359	2557.64	2326.87	1905.66	2909.36	3411.1	3386.91	131.53	118.81	96.5408	135.708	162.992	179.242
LOC725480	innexin inx1	725480	2089.72	-0.614457	0.193484	-3.17575	0.00149449	0.0360224	1800.34	1728.16	1424.45	2685.2	2892.54	2007.63	7.21888	6.50174	5.05076	9.46317	10.2869	8.03733
LOC410986	dorsal-ventral patterning tolloid-like protein 1	410986	34550.5	0.430597	0.135812	3.17055	0.00152152	0.0364984	36987.1	45186.4	36832.9	26927.9	31493.4	29875.3	147.182	173.426	134.12	94.0033	115.198	119.813
LOC725563	uncharacterized LOC725563	725563	3457	0.361902	0.11417	3.16984	0.00152525	0.0365004	4095.48	3866.95	3702.49	2790.28	3091.99	3194.83	10.1339	9.17142	8.11532	6.305	7.1102	8.09084
LOC113219365	uncharacterized LOC113219365	113219365	94.294	2.36407	0.746666	3.16617	0.00154463	0.036671	184.293	254.196	35.211	35.0244	16.1715	40.8677	2.10347	2.81764	0.419345	0.226919	0.0499518	0.408496
LOC100576165	uncharacterized LOC100576165	100576165	677.185	0.589603	0.186196	3.16657	0.00154249	0.036671	924.562	681.581	834.395	561.558	556.299	504.716	17.8861	12.9378	14.8662	8.68029	9.33751	9.61337
LOC412467	bifunctional purine biosynthesis protein PURH	412467	3005.3	-0.473487	0.149486	-3.16742	0.00153796	0.036671	2773.69	2453.51	2321.79	3202.4	3296.82	3983.58	22.2945	18.7655	17.4507	22.6052	24.7632	31.8483
LOC408480	PTB domain-containing engulfment adapter protein 1	408480	47721.7	-0.51139	0.161702	-3.16255	0.00156396	0.0369855	43003.7	37712.3	37336.5	67631	49714.3	50932.4	357.531	308.341	283.199	488.879	367.768	412.245
LOC100576279	low-density lipoprotein receptor-related protein 2	100576279	444.56	-0.593232	0.187869	-3.15769	0.00159023	0.0374301	350.776	353.826	358.512	614.095	471.129	519.02	0.285892	0.31423	0.219138	0.372135	0.506062	0.41112
LOC411920	ubiquitin carboxyl-terminal hydrolase 22	411920	4759.92	0.44453	0.140822	3.15667	0.0015958	0.0374733	5012.3	6259	5190.96	4361.71	3951.23	3784.35	21.0411	24.5068	19.431	15.6084	15.2402	15.2257
LOC410447	importin subunit beta-1	410447	10222.1	-0.397071	0.125991	-3.15158	0.0016239	0.038044	9161.99	8469.49	8840.1	12998.7	11499	10363	4.579	5.47221	5.54749	2.84627	3.33307	3.20036
LOC409142	sodium- and chloride-dependent transporter XTRP3	409142	12380	0.541816	0.172155	3.14726	0.00164807	0.0385203	13830.5	16725.7	13477.3	9769.47	8535.3	11941.5	43.9887	48.7483	37.8608	26.8258	25.2306	38.4195
LOC408412	protein l(2)37Cc	408412	9320.58	-0.322444	0.102629	-3.14183	0.00167895	0.0391508	8599.82	7962.96	8286.33	11093.4	9739.54	10241.4	153.745	133.342	133.578	169.108	156.005	179.358
LOC107964838	probable uridine nucleosidase 2	107964838	1502.17	1.46997	0.468295	3.13899	0.0016953	0.0394404	1037.62	3476.81	2108.39	387.603	1056.54	946.087	13.5285	45.397	27.1729	4.1513	12.732	11.8907
LOC411233	U3 small nucleolar ribonucleoprotein protein MPP10	411233	1720.21	-0.457393	0.14581	-3.13692	0.00170732	0.0396281	1581.2	1282.16	1485.26	2150.5	1971.84	1850.29	9.56873	7.21419	8.52797	10.7406	10.4119	10.6373
LOC100577980	uncharacterized LOC100577980	100577980	1056.84	3.21134	1.02477	3.13372	0.00172608	0.0399709	514.936	3514.99	1693.33	39.6943	269.525	308.551	2.21327	14.4759	6.45088	0.0886838	1.02002	1.33091
LOC113219317	uncharacterized LOC113219317	113219317	40.0777	2.26514	0.72332	3.13159	0.00173861	0.0401683	49.5578	78.2142	71.489	8.17236	6.46859	26.564	0.696863	0.732573	0.710102	0.0955101	0.0926492	0.335964
NLG-4	neuroligin 4	411321	63.0586	2.06983	0.662372	3.12488	0.00177879	0.0410022	50.3321	63.3163	192.06	24.5171	21.562	26.564	0.114251	0.147383	0.469088	0.0555586	0.0360124	0.0744234
LOC726461	protein shank	726461	5126.43	0.517899	0.165928	3.12122	0.00180103	0.0414195	4969.71	7089.56	6052.03	3972.93	4162.54	4511.79	7.91624	11.9533	9.23997	5.1358	5.64451	7.02944
LOC100578719	protein spaetzle 4	100578719	152.848	-1.0508	0.336954	-3.11853	0.00181755	0.0417039	102.987	109.872	85.3601	273.19	162.793	182.883	0.559036	0.562716	0.591045	1.59759	1.13655	0.890092
LOC100576484	caspase-1	100576484	161.137	2.7876	0.895124	3.11421	0.0018444	0.0421272	102.987	598.711	142.978	4.66992	58.2173	59.2582	1.37456	7.93403	1.99374	0.0880605	0.892265	0.833608
LOC100576418	tetra-peptide repeat homeobox protein 1	100576418	103.617	3.10814	0.997863	3.1148	0.00184071	0.0421272	19.3585	438.558	99.2311	9.33984	39.8896	15.3254	0.135304	4.2924	0.831702	0.0704485	0.410337	0.141585
LOC550941	ABC transporter G family member 20	550941	816.897	-0.460354	0.147866	-3.11333	0.0018499	0.0421568	613.277	743.035	707.421	942.156	961.663	933.827	0	0.0525841	0.0774171	1.53786	0.0957888	0.316955
LOC726924	synapse-associated protein 1	726924	7773.66	0.649063	0.2086	3.11152	0.00186125	0.0422482	7439.86	12412.8	8627.77	6429.31	5665.41	6066.81	25.0942	39.1298	24.9403	18.1717	17.0811	19.6067
LOC102654106	uncharacterized LOC102654106	102654106	41.2323	-4.20014	1.34994	-3.11135	0.00186234	0.0422482	0	6.51785	6.402	75.8862	4.31239	154.276	0	0	0	0.245053	0	0.986811
LOC100576690	negative elongation factor E	100576690	25952.3	3.01809	0.970478	3.1099	0.00187148	0.0423597	13829.7	38762.6	86012	3999.79	1917.94	11191.6	0.0665193	0.0525404	0.422065	0.116935	0.042014	0.509229
LOC102654448	protein tiptop	102654448	1201.57	0.688362	0.221445	3.1085	0.00188038	0.0424652	1269.92	1943.25	1235.59	901.295	955.195	904.198	2.75939	4.28846	2.44828	1.76853	1.93559	2.01973
LOC551472	trafficking protein particle complex subunit 10	551472	828.612	0.549805	0.177245	3.10195	0.00192249	0.0432215	909.075	970.229	1074.47	779.877	639.312	598.712	3.71821	3.61132	3.76601	2.7274	2.27582	2.23707
LOC113219131	uncharacterized LOC113219131	113219131	1110.96	0.852547	0.275024	3.0999	0.00193589	0.0434253	1313.28	1544.73	1431.91	958.501	492.691	924.632	0.313864	0	0.530792	0.149269	1.0004	0
LOC410072	26S proteasome non-ATPase regulatory subunit 14	410072	7007.64	-0.401224	0.129558	-3.09686	0.00195585	0.0437752	6663.19	6227.34	5226.17	7924.85	8015.66	7988.61	106.458	95.1823	76.8	108.855	116.675	127.369
LOC102654777	organic cation transporter protein	102654777	5662.71	2.70489	0.873959	3.09498	0.00196825	0.0439547	3060.97	20533.1	5864.24	818.404	1581.57	2117.97	15.0349	96.1997	25.5589	2.96281	6.1152	9.43914
LOC100576859	cilia- and flagella-associated protein 36	100576859	4990.33	-0.412057	0.133196	-3.09362	0.00197734	0.0439786	4434.64	4132.32	4279.74	6118.76	6063.22	4913.32	0.707062	0.682024	0.93494	0.950935	0.744673	0.70895
LOC726054	transport and Golgi organization 2 homolog	726054	19054.2	1.96354	0.63473	3.0935	0.00197809	0.0439786	12980.3	55250.9	22763.4	5830.4	9056.02	8444.29	240.429	1004.61	395.024	92.9154	152.223	153.961
LOC724418	venom acid phosphatase Acph-1-like	724418	1331.63	-3.3608	1.08706	-3.09164	0.00199051	0.0441568	205.974	261.645	241.142	3790.81	3341.03	149.167	2.32309	2.79663	1.13606	34.0627	31.9574	1.35962
LOC551197	probable cytochrome P450 6a13	551197	14923.7	2.86711	0.929259	3.08537	0.002033	0.044802	8352.03	55069.3	15327.5	1769.9	3217.04	5806.28	72.8877	514.345	129.271	5.02677	20.3044	48.2171
LOC102656556	uncharacterized LOC102656556	102656556	78.1196	1.47075	0.476614	3.08582	0.00202992	0.044802	76.6596	108.01	160.05	38.5268	32.3429	53.128	2.0823	1.34851	2.11495	1.05713	0.58236	1.06337
LOC411009	dachshund homolog 2	411009	1268.89	0.875162	0.283588	3.08603	0.0020285	0.044802	2072.91	1713.26	1140.62	868.605	689.983	1127.95	5.3717	4.78775	2.34026	1.72603	1.04311	2.24996
LOC725359	uncharacterized LOC725359	725359	2434.52	2.88039	0.934081	3.08366	0.00204471	0.0448628	776.663	8735.79	3348.25	389.938	462.504	893.981	3.34156	2.47982	2.36139	2.49333	2.0391	3.04628
LOC411935	large neutral amino acids transporter small subunit 2	411935	704.459	1.14137	0.370059	3.0843	0.00204032	0.0448628	541.264	1319.4	1047.79	447.145	559.533	311.616	3.94978	9.28413	6.91384	2.77706	3.52721	1.87816
LOC113218722	uncharacterized LOC113218722	113218722	814.111	-0.426326	0.138427	-3.0798	0.0020714	0.0453492	702.326	670.408	711.689	858.098	974.601	967.543	0.0702567	0.0975163	0.0358866	0.182825	0.230962	0.220429
LOC413427	uncharacterized LOC413427	413427	8793.13	0.550742	0.178948	3.07766	0.00208633	0.0455766	11139.7	11441.6	8772.88	6511.04	6373.72	8519.89	26.0736	25.1917	17.8923	13.1853	13.4746	19.308
LOC412430	major facilitator superfamily domain-containing protein 6	412430	5197.04	0.845994	0.27495	3.0769	0.00209167	0.0455938	4931.77	9857.79	5246.44	3360.01	3884.39	3901.84	26.4246	58.706	25.633	12.3533	18.8902	19.5143
LOC107964271	uncharacterized LOC107964271	107964271	1475.97	0.493856	0.160627	3.07456	0.00210815	0.0456177	1927.33	1811.96	1438.32	1201.34	1235.5	1241.36	6.23932	5.92019	4.36632	3.31226	3.62095	3.66908
LOC100576346	protein PFC0760c	100576346	1243.43	0.530559	0.172506	3.0756	0.00210079	0.0456177	1526.22	1435.79	1445.79	1220.02	894.821	937.914	3.64653	3.40182	3.29027	2.48507	2.06869	2.30391
LOC100578132	glutamate--cysteine ligase catalytic subunit	100578132	3307.98	-0.355716	0.115712	-3.07416	0.00211096	0.0456177	3016.05	2952.59	2736.86	4003.29	3466.09	3672.98	20.844	20.0576	17.484	24.749	23.1863	26.7457
LOC409963	6-phosphofructo-2-kinase/fructose-2,6-bisphosphatase	409963	36936	0.894991	0.291745	3.06772	0.002157	0.0464126	27173.1	67764.3	49180.2	25634.4	26052.2	25812	112.79	254.645	180.593	93.8434	103.195	111.165
LOC552309	pecanex-like protein 1	552309	5633.27	0.536022	0.174696	3.06831	0.00215271	0.0464126	5636.42	6142.61	8225.51	4850.88	4477.34	4466.84	10.0522	11.2545	14.0484	7.55942	7.37893	7.84581
LOC409653	tRNA-splicing ligase RtcB homolog	409653	2369.61	-0.349481	0.114223	-3.05966	0.00221592	0.0473753	2028	2052.19	2172.41	2728.4	2450.52	2786.16	17.1434	15.8773	15.6368	19.6946	18.4298	22.5428
LOC113219384	uncharacterized LOC113219384	113219384	20.105	2.80135	0.916413	3.05686	0.00223667	0.0477173	40.2657	50.2806	14.938	5.8374	2.1562	7.15185	0.386149	0.498133	0.206999	0	0	0.0703128
LOC726750	fibroin heavy chain	726750	3042.24	-2.1537	0.704923	-3.05522	0.00224894	0.047877	1039.16	1322.19	988.043	7999.57	5621.2	1283.25	3.34628	4.06469	2.95288	23.1352	17.1329	4.1697
LOC100578666	uncharacterized LOC100578666	100578666	165.803	1.89354	0.619928	3.05445	0.00225471	0.0478982	80.5313	473.01	230.472	50.2016	81.9354	78.6703	1.06111	6.8825	3.82546	0.823266	0.974537	0.836119
LOC551043	phosrestin-2	551043	124.963	-3.55584	1.16531	-3.05142	0.0022776	0.0482822	30.9736	0	27.742	431.968	226.401	32.6942	0.0560819	0	0.119489	2.09258	1.27638	0.220023
LOC413637	F-box/SPRY domain-containing protein 1	413637	171.108	0.765249	0.250859	3.05052	0.00228447	0.0482917	228.43	229.987	187.792	123.753	121.825	134.863	1.23951	1.22657	0.948128	0.443624	0.624322	0.653414
LOC413357	ubiquitin carboxyl-terminal hydrolase 31	413357	3012.07	0.6399	0.20984	3.04946	0.0022925	0.0482917	4622.03	2817.58	3568.05	2210.04	2239.21	2615.53	11.5883	6.90258	8.05295	4.58142	4.74036	5.95505
LOC409159	G-protein coupled receptor moody	409159	514.771	-0.94157	0.30876	-3.04952	0.0022921	0.0482917	264.824	452.525	340.373	747.187	809.652	474.065	1.94814	2.98793	2.16808	4.72167	5.24873	3.13393
LOC100578123	uncharacterized LOC100578123	100578123	39.4336	3.64715	1.19625	3.04881	0.00229748	0.0482952	27.8762	166.671	24.541	9.33984	0	8.17354	0.561111	4.0665	0.300695	0.121809	0.0590332	0.122431
LOC552832	glycine N-methyltransferase	552832	150.649	-1.61648	0.530431	-3.04749	0.00230763	0.0484071	74.3366	91.25	56.551	215.984	368.71	97.0608	1.00168	1.35457	0.804303	2.66333	4.95421	1.52959
LOC726241	tudor domain-containing protein 7	726241	3247.64	0.469026	0.153972	3.04618	0.00231768	0.0485164	3180.99	3763.6	4369.37	2723.73	2782.57	2665.6	13.2111	14.9271	16.0624	9.75243	10.368	10.8587
LOC408337	uncharacterized LOC408337	408337	16211.7	0.461741	0.151738	3.04301	0.00234222	0.0489279	15886.4	20798.5	19668	14894.7	12307.6	13715.2	19.1215	23.6644	21.6134	15.9297	13.5869	16.4406
LOC412780	transmembrane protein 8B	412780	781.457	0.49924	0.164382	3.03707	0.00238886	0.0495402	961.73	946.951	836.529	687.646	687.827	568.061	5.33847	4.87206	3.91358	3.32838	3.56195	3.27276
LOC113218545	ras-interacting protein RIP3-like	113218545	20.8332	2.50736	0.825668	3.03677	0.00239129	0.0495402	17.0355	46.5561	42.68	8.17236	6.46859	4.08677	0.0644163	0.173809	0.150698	0.0279348	0.0271531	0.014033
Mir14	microRNA 14	100315661	2132.72	0.552025	0.18188	3.0351	0.00240457	0.0497126	2765.17	1985.15	2857.43	1627.47	1767	1794.09
LOC412850	SWI/SNF-related matrix-associated actin-dependent regulator of chromatin subfamily A containing DEAD/H box 1 homolog	412850	9138.38	0.520276	0.171687	3.03037	0.00244256	0.0503203	9165.09	13009.6	10131.2	7768.41	6730.57	8025.4	8.22897	8.63772	8.4408	8.77587	8.32011	9.45397
LOC724930	caspase-8	724930	1299.81	-0.363379	0.11992	-3.03019	0.002444	0.0503203	1140.6	1102.45	1168.37	1364.78	1512.57	1510.06	6.79963	5.9585	6.29192	6.92335	7.85214	8.38254
LOC409867	FERM domain-containing protein 8	409867	5929.84	-0.315267	0.104124	-3.0278	0.00246345	0.0506168	5209.76	5499.21	5144.01	7042.24	6180.74	6503.07	0.928817	1.13513	1.37864	1.98479	1.92844	2.19742
LOC409865	protein retinal degeneration B	409865	12218.6	0.347435	0.114772	3.02717	0.00246856	0.0506182	12660.5	14855.1	13532.8	11482.2	10226.8	10554.1	25.234	29.627	24.7331	19.5556	17.6369	19.005
LOC552210	fumarylacetoacetase	552210	12782.7	-1.13713	0.375874	-3.0253	0.00248385	0.0507269	12189.7	8251.6	3529.64	14316.8	18478.6	19930.2	146.852	94.0921	37.9669	144.986	197.89	232.93
LOC413481	probable chitinase 10	413481	8481.29	0.471683	0.155914	3.02529	0.00248398	0.0507269	11532.2	8885.7	9147.4	7895.67	6554.84	6871.9	48.764	35.8965	34.3519	28.2063	24.975	28.4261
LOC409991	dnaJ homolog subfamily C member 11	409991	2086.01	-0.327547	0.108351	-3.02302	0.00250269	0.0510049	1894.81	1808.24	1846.98	2471.56	2227.35	2267.14	14.4562	12.6142	12.8583	16.7311	15.8264	17.4278
LOC725732	uncharacterized LOC725732	725732	38229.2	0.476053	0.157537	3.02185	0.00251237	0.0510985	37218.6	46195.8	50026.3	33772.9	28273.1	33888.5	68.717	95.6769	93.424	61.3402	48.0132	62.9716
LOC551343	26S proteasome regulatory subunit 7	551343	12161.1	-0.431793	0.143157	-3.01623	0.0025594	0.0519495	11658.5	10721.9	8682.18	13929.2	13591.6	14383.4	133.271	115.532	90.9648	137.405	140.556	161.706
LOC411585	E3 ubiquitin-protein ligase NRDP1	411585	912.606	-0.576961	0.191393	-3.01453	0.00257379	0.052031	796.796	662.959	737.297	1266.72	901.29	1110.58	8.60859	6.7023	7.11504	10.8084	8.75237	10.258
LOC551061	multidrug resistance-associated protein 4	551061	7642.53	0.646391	0.214423	3.01456	0.00257354	0.052031	6572.6	10955.6	10452.3	5501.17	6459.96	5913.56	20.2426	31.9267	28.9784	14.7417	18.1465	17.7805
LOC409258	eukaryotic translation initiation factor 3 subunit I	409258	3812.71	-0.320111	0.106236	-3.0132	0.00258505	0.0521535	3475.24	3431.18	3267.16	4434.09	3925.35	4343.22	56.557	53.7591	48.6228	62.0008	58.6383	70.805
LOC410470	putative polypeptide N-acetylgalactosaminyltransferase 9	410470	1430.53	1.35282	0.449512	3.00952	0.00261658	0.052632	751.11	2879.03	2538.39	580.238	1043.6	790.79	0.468446	2.92385	2.08788	0.239778	0.417406	0.446682
LOC411566	mitogen-activated protein kinase kinase kinase 11	411566	2943.49	0.355238	0.11805	3.00921	0.00261926	0.052632	3064.84	3283.14	3564.85	2728.4	2482.86	2536.86	4.36518	5.1163	4.86875	3.14892	2.35774	2.90936
CPR21	cuticular protein 21	724649	71.1287	-1.53425	0.510558	-3.00505	0.00265535	0.0531441	47.2347	43.7627	18.139	87.561	101.341	128.733	1.02092	0.872749	0.346067	1.40006	1.83101	2.67393
LOC408283	E3 ubiquitin-protein ligase RNF13	408283	7319.77	0.360191	0.119855	3.00523	0.00265378	0.0531441	7675.26	8270.23	8741.94	6467.84	5846.53	6916.86	30.5891	33.8286	32.446	25.1343	24.3082	26.9298
Mir6060	microRNA 6060	104794352	128879	-0.631049	0.210344	-3.00009	0.00269904	0.0538672	118932	112122	72345.8	140678	154453	174745	0	0	0	0	0	0
LOC724220	synaptotagmin-10	724220	419.175	-0.778449	0.259507	-2.99973	0.00270222	0.0538672	358.519	348.24	218.735	482.169	563.845	543.54	0.940243	0.803718	0.489624	1.05942	1.28973	1.35856
LOC408690	calmodulin	408690	1169.38	-1.27723	0.42599	-2.99826	0.00271526	0.0540197	643.476	689.961	715.957	1154.64	2974.47	837.788	5.23833	6.84727	6.91917	8.26256	9.05579	7.07399
LOC725699	uncharacterized LOC725699	725699	2334.84	1.29567	0.432725	2.99422	0.00275149	0.0546321	2178.22	2198.38	5578.28	749.522	1415.54	1889.11	4.01703	3.77837	9.18264	1.08543	2.26512	3.12044
LOC552486	F-actin-capping protein subunit alpha	552486	14737	-0.372138	0.124371	-2.99216	0.0027701	0.0548082	14278.8	12587.8	11671.9	17797.1	15898.7	16187.7	95.564	83.9373	60.6709	116.013	106.02	110.179
LOC413669	protein lap4	413669	3066.48	0.621437	0.208046	2.98702	0.00281708	0.0555279	2737.29	4550.39	3863.61	2345.47	2578.81	2323.33	5.42698	8.03542	6.56758	3.94651	4.85961	4.58437
LOC726463	inositol monophosphatase 2	726463	3584.36	2.27469	0.76157	2.98684	0.00281876	0.0555279	2199.9	10944.4	4678.8	507.854	1655.96	1519.26	40.6405	197.313	80.5247	8.40192	28.1186	28.1982
LOC100577939	probable serine/threonine-protein kinase kinX	100577939	2380.01	-0.344156	0.115372	-2.98302	0.00285423	0.0560653	2187.51	1928.35	2176.68	2594.14	2614.39	2779	0.0274734	0.0636203	0.140744	0.0715239	0.0694312	0.143747
LOC413940	importin-9	413940	4968.58	-0.248436	0.0832924	-2.9827	0.00285723	0.0560653	4498.91	4624.88	4501.68	5459.14	5294.54	5432.34	19.5656	19.2512	16.7216	20.7497	20.5912	23.1297
Err	estrogen-related receptor	408855	13097.5	-0.276307	0.0927342	-2.97956	0.00288665	0.0564143	12577.6	11187.4	11775.4	14236.3	14445.4	14363	19.6083	18.0774	15.0482	22.7222	24.3804	26.4542
LOC409966	dexamethasone-induced Ras-related protein 1	409966	6339.09	-0.243366	0.0816703	-2.97986	0.0028838	0.0564143	5799.03	5732.92	5885.58	6799.4	6781.24	7036.4	11.0058	8.11278	7.37545	9.81876	8.04368	8.8271
LOC726682	A-kinase anchor protein 10, mitochondrial	726682	1688.49	1.06296	0.356987	2.9776	0.00290519	0.0565638	1348.9	3719.83	1782.96	970.176	1211.78	1097.3	7.88998	20.4782	10.2304	5.33221	5.74012	5.67619
LOC411068	kinesin 4A	411068	3562.23	0.338707	0.113892	2.97393	0.00294009	0.0571323	3670.37	3963.79	4302.15	3217.58	3192.25	3027.28	10.8817	11.6697	11.7293	8.17964	8.83622	8.50521
LOC408361	alpha-tocopherol transfer protein-like	408361	32270.7	-0.691747	0.232658	-2.97324	0.00294678	0.0571516	27721.4	21529.4	24785.4	54264.5	34085.1	31238.3	170.839	126.314	135.99	279.577	190.93	188.764
LOC100576449	protein patched	100576449	1008.24	0.453272	0.152646	2.96944	0.00298343	0.0577506	1109.63	1105.24	1281.47	919.974	770.84	862.309	2.82526	2.81794	3.10996	2.1596	1.86089	2.31595
LOC102654427	sodium-dependent nutrient amino acid transporter 1	102654427	1322.07	2.34989	0.791832	2.96766	0.00300078	0.0579746	661.286	3688.17	2282.31	198.472	445.254	656.948	4.04298	23.0977	13.1508	0.369323	2.0974	2.68539
LOC100577667	WAS/WASL-interacting protein family member 3	100577667	8059.57	-0.713947	0.240629	-2.96701	0.00300715	0.057986	6750.7	6745.98	4817.51	13371.1	8496.49	8175.58	1.02751	1.43832	1.37609	2.61249	2.05357	1.62509
LOC410070	centrosome-associated protein 350	410070	1356.44	0.447261	0.150843	2.96508	0.00302601	0.0582377	1441.82	1449.76	1804.3	1176.82	1129.85	1136.12	1.89313	1.87963	2.33261	1.39392	1.33978	1.41126
LOC102655622	facilitated trehalose transporter Tret1	102655622	7102.5	2.67498	0.902757	2.96312	0.00304536	0.0583386	2194.48	20594.6	14056.7	937.487	2191.77	2640.05	18.5408	162.69	102.607	6.57834	16.5991	21.6632
LOC413168	retinol dehydrogenase 14	413168	1234.67	-1.04618	0.35303	-2.96344	0.00304223	0.0583386	851	964.642	600.721	2438.87	1612.83	939.957	8.51862	8.09791	5.49428	22.4925	13.8322	11.4055
LOC409125	mitogen-activated protein kinase kinase kinase 4	409125	2941.46	0.390896	0.131935	2.96278	0.00304871	0.0583386	3156.98	3415.36	3440.01	2868.5	2395.53	2372.37	11.8953	12.0875	11.6484	9.13297	8.16388	8.71971
LOC726058	FACT complex subunit Ssrp1	726058	14849	-0.299127	0.101022	-2.96102	0.00306626	0.0584513	14018.6	12959.4	12966.2	16986.8	15247.5	16915.1	41.2789	37.4026	39.8374	47.9037	48.545	53.7984
LOC408859	pyrroline-5-carboxylate reductase 2	408859	4107.38	2.83607	0.957663	2.96145	0.00306191	0.0584513	1706.65	15689.4	4221.05	455.317	1450.04	1121.82	18.482	165.465	44.6955	4.21146	12.9616	11.2291
GluCl	glutamate-gated chloride channel	408450	2867.85	-0.504487	0.170433	-2.96003	0.00307606	0.0584643	2228.55	2223.52	2663.23	3404.37	2820.3	3867.11	3.56068	3.44718	4.00591	5.18554	4.65902	6.92832
LOC102656644	uncharacterized LOC102656644	102656644	1801.27	0.974165	0.329199	2.9592	0.00308443	0.0584643	1728.33	2324.08	3110.31	713.33	1510.42	1421.17	4.76187	6.53589	8.64653	1.79333	4.12656	3.79487
LOC412866	E3 ubiquitin-protein ligase SMURF2	412866	788.81	0.45224	0.152818	2.95934	0.003083	0.0584643	820.8	1002.82	911.219	658.459	646.859	692.708	0.665238	1.83198	1.7046	0.782304	0.709713	0.668474
LOC726505	uncharacterized LOC726505	726505	851.187	3.20772	1.08577	2.95433	0.0031335	0.059184	485.511	3509.4	613.525	40.8618	197.292	260.532	2.11121	15.4163	2.38435	0.0934341	0.780826	1.03264
LOC413048	bifunctional 3'-phosphoadenosine 5'-phosphosulfate synthase 2	413048	216.855	1.57714	0.533853	2.95426	0.00313421	0.059184	181.97	585.676	206.998	73.5512	147.699	105.234	1.32318	3.79111	1.25104	0.464055	0.976624	0.699459
LOC113218562	trypsin-7-like	113218562	103.549	1.0649	0.360804	2.95146	0.00316277	0.0596111	161.837	114.528	144.045	52.5366	81.9354	66.41	1.55215	1.031	1.33552	0.430552	0.610954	0.565769
LOC726349	actin-binding LIM protein 2	726349	30526.4	0.462329	0.156852	2.94755	0.00320298	0.0602557	32788.6	31749.4	41591.7	25741.8	22944.1	28342.8	64.3482	70.6095	82.141	47.0243	41.6848	52.8548
LOC410578	sodium- and chloride-dependent glycine transporter 2	410578	1342.86	1.35005	0.458219	2.9463	0.00321598	0.0603618	863.389	2767.29	2156.41	765.867	1098.58	405.612	1.71079	5.35062	4.00601	1.42002	2.20409	0.720415
LOC411276	hybrid signal transduction histidine kinase D	411276	17775.2	0.919316	0.312071	2.94585	0.00322066	0.0603618	13492.9	35400.3	20870.5	11282.5	12136.1	13469	1.0583	1.72369	1.13888	0.506758	0.523823	0.340365
LOC408807	uncharacterized LOC408807	408807	11105	-3.56338	1.21041	-2.94393	0.00324073	0.0606247	2518.93	1656.47	1021.12	25902.9	34684.6	845.961	52.5634	32.3658	19.5907	456.286	642.59	16.6903
LOC408888	leucine-rich repeats and immunoglobulin-like domains protein 1	408888	23747	3.12302	1.06241	2.93955	0.00328688	0.0613377	8331.12	88086	31394.4	1288.9	4047.18	9334.18	0.836944	2.00707	1.17445	1.04514	1.85586	0.935063
LOC102656796	uncharacterized protein PFB0145c	102656796	1091.81	0.539812	0.183662	2.93916	0.00329108	0.0613377	1431.75	1034.48	1414.84	914.137	847.385	908.285	2.38348	2.24022	2.88879	1.62831	1.83046	1.76399
LOC100577409	solute carrier organic anion transporter family member 3A1	100577409	2582.37	0.856784	0.29171	2.9371	0.00331293	0.0616303	2074.46	3461.91	4446.19	2108.47	1951.36	1451.83	1.56815	3.41055	4.77753	1.46409	1.43062	1.32808
LOC725629	DNA-binding protein D-ETS-6-like	725629	124.494	-6.63458	2.26084	-2.93456	0.00334017	0.062022	0	7.44898	0	371.259	360.085	8.17354	0.0340316	0.0788465	0	4.03204	4.04102	0.0890561
LOC411204	WD repeat-containing protein 37	411204	4296.06	-0.285596	0.0973619	-2.93335	0.0033533	0.0621507	4011.08	3911.64	3692.89	4840.37	4520.46	4799.91	38.0159	34.7015	31.3983	39.3598	39.4389	43.9057
LOC409588	putative thiamine transporter SLC35F3	409588	7770.93	-0.349721	0.119318	-2.93099	0.0033788	0.0625078	6892.4	7033.7	6574.86	8499.26	7950.97	9674.41	18.3577	15.8528	12.5728	23.5536	22.4569	31.7299
LOC552334	splicing factor 3A subunit 2	552334	1189.23	-0.351515	0.12003	-2.92855	0.00340544	0.0628847	1009.74	1078.24	1047.79	1280.73	1310.97	1407.89	18.9151	20.2496	18.1832	21.7904	22.8878	26.9524
LOC100576233	uncharacterized LOC100576233	100576233	189.414	-0.817196	0.279113	-2.92783	0.00341332	0.0629143	122.346	159.222	130.174	194.969	264.134	265.64	2.54466	2.31165	2.59695	1.82176	3.13158	2.87228
LOC410293	collectin-11	410293	789.889	-0.906894	0.30993	-2.92613	0.0034321	0.0630287	714.716	398.52	534.567	1231.69	1158.96	700.881	2.82566	1.55771	1.8544	3.96848	3.53947	2.45103
LOC100578992	uncharacterized LOC100578992	100578992	1000.66	1.44047	0.492789	2.9231	0.00346565	0.0635285	570.689	2146.24	1670.92	273.19	652.249	690.664	0.57418	2.84831	3.55594	0.10843	0.749566	1.07727
LOC100576747	maternal protein tudor	100576747	1109.57	0.408905	0.139956	2.92166	0.00348169	0.0637061	1238.94	1298.92	1259.06	1062.41	877.572	920.545	1.97409	1.96608	1.69756	1.48332	1.29702	1.52149
LOC102655889	uncharacterized protein PF11_0213	102655889	245.142	-1.62461	0.556294	-2.92042	0.00349555	0.0638431	57.3012	136.875	166.452	288.368	632.844	189.013	0.0567672	0.146828	0.141181	0.235565	0.588181	0.183668
LOC409937	neither inactivation nor afterpotential protein C	409937	369.333	0.749146	0.256592	2.9196	0.00350479	0.0638516	468.476	349.171	571.912	276.693	294.321	255.423	1.32154	1.02299	1.56094	0.692648	0.74951	0.740844
LOC408368	adenosylhomocysteinase	408368	2811.95	-0.311012	0.106538	-2.91925	0.00350875	0.0638516	2522.03	2368.77	2639.76	3029.61	3251.54	3059.97	29.206	26.0888	27.0801	29.487	33.523	34.7947
LOC724919	mitochondrial amidoxime reducing component 2	724919	11091.6	0.550383	0.189013	2.91188	0.00359257	0.0652586	10788.1	16756.5	12001.6	9376.03	9143.35	8484.14	230.072	244.929	189.916	213.427	262.21	299.826
LOC100577827	uncharacterized LOC100577827	100577827	6340.12	0.617485	0.212363	2.90769	0.00364109	0.0660074	5716.95	9635.25	7678.14	4639.57	5616.89	4753.94	12.7539	12.3368	10.3784	8.6354	6.08295	7.46135
LOC100576134	uncharacterized LOC100576134	100576134	5798.54	-0.832265	0.286278	-2.90719	0.00364696	0.0660074	4800.91	4491.73	3219.14	10778.2	5684.81	5816.5	32.9423	29.8813	20.1682	63.0408	36.0371	39.6626
LOC409134	T-complex protein 1 subunit alpha	409134	14447.7	-0.297614	0.102594	-2.90088	0.00372113	0.0670755	13645.4	13021.7	12220.4	15595.2	15250.8	16952.9	118.616	108.351	95.5662	116.441	120.31	145.177
LOC408792	protein 4.1 homolog	408792	5778.81	-0.352662	0.121592	-2.90037	0.00372719	0.0670755	5184.21	5129.55	4913.54	7094.78	5772.14	6578.68	13.6938	14.3627	12.3498	20.4279	16.259	20.6017
LOC725146	very-long-chain enoyl-CoA reductase	725146	11310.4	-0.449128	0.154787	-2.90159	0.0037128	0.0670755	11227.2	9523.52	7939.55	13377	12923.2	12872.3	149.847	120.038	89.5351	149.205	153.094	169.416
LOC107964859	uncharacterized LOC107964859	107964859	25.8225	2.13295	0.735524	2.89991	0.00373274	0.0670755	41.04	31.6581	53.35	16.3447	5.39049	7.15185	0	0	0	0	0.0162941	0
LOC409965	cyclin-dependent kinase 12	409965	4895.01	0.28264	0.0975099	2.89858	0.00374855	0.0672352	5228.34	5546.69	5343.54	4678.09	4302.69	4270.68	11.1544	11.829	10.8012	8.41166	7.66039	8.09508
LOC551672	protein FAM114A2	551672	4124.91	-0.312971	0.108021	-2.89731	0.00376379	0.0672352	3651.01	3546.64	3840.14	4906.92	4312.39	4492.38	27.4943	25.3285	25.9782	32.1324	29.5523	32.7546
LOC409628	neutral ceramidase	409628	4008.62	0.700662	0.241864	2.89692	0.00376845	0.0672352	5473.81	3624.86	5791.68	2915.2	2451.59	3794.57	32.1763	20.0008	31.6707	14.7943	13.2152	21.6896
LOC551944	prohibitin-2	551944	14263.2	-0.262032	0.0905679	-2.89321	0.00381328	0.0679143	13519.2	12934.2	12459.4	16223.3	15123.6	15319.3	108.746	99.837	91.4196	110.913	108.584	117.382
LOC100578609	uncharacterized LOC100578609	100578609	44.8187	1.32312	0.458154	2.88793	0.00387782	0.0688193	67.3676	58.6607	66.154	24.5171	21.562	30.6508	0.616699	0.374078	0.489139	0.2676	0.0742092	0.115249
LOC411091	RNA-binding protein 34	411091	2762.53	-0.388777	0.134603	-2.88831	0.00387318	0.0688193	2708.64	2282.18	2185.22	3257.27	3134.03	3007.86	19.6841	15.4029	14.1029	19.8079	20.2505	20.7439
LOC113219007	zinc finger protein 524-like	113219007	3164.15	-0.419396	0.145517	-2.88212	0.00395015	0.0698556	2894.48	2871.58	2354.87	3988.11	3473.63	3402.24	1.67653	0.651243	1.0208	1.60478	1.82895	1.46744
LOC410022	mitochondrial-processing peptidase subunit beta	410022	27750.1	-0.309949	0.107642	-2.87945	0.00398373	0.070289	23711.1	26233.4	24398	30236.6	28727	33194.8	237.333	251.136	221.1	260.392	262.001	325.838
LOC408842	transportin-1	408842	6575.13	-0.304181	0.105653	-2.87906	0.00398867	0.070289	5888.08	6089.54	5675.38	7293.25	7763.38	6741.13	2.85453	2.738	2.62069	3.11393	3.676	3.56825
Tpx-3	thioredoxin peroxidase 3	408540	7934.75	-0.253313	0.0880496	-2.87693	0.00401562	0.0705796	7395.72	7394.04	6929.1	8745.59	8377.9	8766.12	88.9498	83.0495	65.2711	90.188	87.4086	105.006
LOC726498	mitochondrial import inner membrane translocase subunit Tim8	726498	1138.4	-0.343049	0.11926	-2.87648	0.00402132	0.0705796	995.801	978.609	1037.12	1262.05	1221.49	1335.35	60.4129	57.521	60.2535	66.571	67.5408	83.6422
LOC412813	zwei Ig domain protein zig-8	412813	194.417	1.23779	0.430371	2.8761	0.00402628	0.0705796	291.926	270.957	256.08	116.748	173.574	57.2148	0.884881	0.691898	0.695616	0.245738	0.424767	0.218387
LOC551316	DNA excision repair protein ERCC-1	551316	1226.66	-0.612608	0.213191	-2.87351	0.00405932	0.0708836	1204.1	774.694	930.425	1622.8	1521.2	1306.74	27.1147	16.8438	19.3812	31.456	31.329	28.0538
LOC411569	protein TANC2	411569	68276.5	-0.858014	0.298638	-2.87309	0.00406483	0.0708836	48964.6	68409.5	28279.8	76269.1	104650	83086.1	359.026	483.212	180.611	489.665	718.745	603.448
LOC113219139	uncharacterized LOC113219139	113219139	82.5667	1.64841	0.573692	2.87334	0.00406156	0.0708836	164.934	112.666	98.1641	16.3447	40.9677	62.3232	0.943968	0.976335	0.518834	0.219465	0.340704	0.57344
LOC726247	protein vestigial	726247	692.517	0.687316	0.239416	2.8708	0.00409434	0.0710276	963.279	907.844	691.416	579.07	604.813	408.677	6.16542	5.8788	4.02589	2.97357	2.86181	2.38149
LOC551232	probable nuclear hormone receptor HR38	551232	216.076	1.02247	0.356152	2.87087	0.00409347	0.0710276	201.328	404.107	263.549	141.265	119.669	166.536	0.760751	1.35978	0.806849	0.415791	0.355778	0.551394
LOC726850	cytochrome b5	726850	2129.77	-0.583942	0.203387	-2.87109	0.00409055	0.0710276	1666.38	2133.2	1313.48	2619.83	2413.86	2631.88	48.2734	57.7224	35.2859	65.5296	63.165	72.8681
LOC724603	receptor-type guanylate cyclase Gyc76C-like	724603	8396.39	0.628966	0.219597	2.86418	0.0041809	0.0721547	7605.57	11195.8	11793.6	7970.39	5608.27	6204.74	20.2443	28.8788	28.7593	18.0522	13.25	16.3202
LOC726980	uncharacterized LOC726980	726980	1181.52	2.96185	1.03395	2.8646	0.0041754	0.0721547	793.698	4017.79	1471.39	42.0293	351.46	412.764	20.4624	101.481	33.4865	0.549013	8.18884	10.3034
LOC726481	inositol monophosphatase 2	726481	4389	2.76304	0.965254	2.8625	0.0042031	0.0724132	2348.57	12835.5	7768.83	242.836	1261.37	1876.85	32.5133	165.514	92.7135	2.88102	14.0547	24.4131
LOC406144	abaecin	406144	4009.63	-0.595019	0.208118	-2.85905	0.00424911	0.0730802	2874.35	2753.33	3956.44	3890.04	5192.12	5391.47	384.205	369.343	516.857	459.766	626.837	726.75
LOC410465	UNC93-like protein	410465	188.565	2.32516	0.813687	2.85757	0.00426905	0.0732975	168.032	462.768	312.631	5.8374	63.6078	118.516	0.64989	3.17478	1.58886	0.0375045	0.473728	0.68235
LOC102654745	uncharacterized LOC102654745	102654745	1669.87	-0.347736	0.12191	-2.85241	0.00433895	0.0742434	1519.25	1534.49	1354.02	1960.2	1791.8	1859.48	0.0482978	0	0	0	0	0
LOC100578434	sushi, von Willebrand factor type A, EGF and pentraxin domain-containing protein 1	100578434	1718.28	0.955339	0.335105	2.85086	0.00436005	0.0744774	2693.15	2958.17	1150.23	1078.75	1109.36	1320.03	5.90229	6.42811	2.27192	2.13502	2.26764	2.81287
LOC724520	uncharacterized LOC724520	724520	154.595	0.793222	0.279268	2.84036	0.00450624	0.0768437	164.934	212.296	211.266	101.571	126.137	111.364	0.492072	0.611245	0.578393	0.302544	0.386902	0.360938
LOC550828	elongation of very long chain fatty acids protein AAEL008004	550828	11851.5	-0.718845	0.253312	-2.83778	0.00454282	0.0771822	6650.81	9195.76	11029.6	19393	11936.7	12903	32.9913	49.2108	58.1827	103.156	63.3338	76.9629
LOC552340	glypican-4	552340	213.625	0.957953	0.337612	2.83744	0.00454771	0.0771822	262.501	211.365	372.383	175.122	114.278	146.102	1.20317	0.950608	1.7133	0.718271	0.511923	0.721646
LOC410288	phytanoyl-CoA dioxygenase	410288	7724.41	0.244186	0.0860618	2.83734	0.00454918	0.0771822	8549.49	8483.45	8096.4	6854.28	7223.26	7139.59	138.298	132.776	117.667	95.854	105.82	113.062
LOC727236	uncharacterized protein CG5098	727236	3382.31	0.292842	0.103234	2.83667	0.00455863	0.0772117	3707.54	3790.6	3674.75	3055.3	3220.28	2845.41	8.90236	8.8796	8.16823	6.42563	6.72523	6.53988
LOC552392	serine palmitoyltransferase 1	552392	9201.16	-0.274108	0.0966498	-2.83609	0.00456689	0.0772213	8726.04	8041.17	8221.24	10123.2	9561.65	10533.7	105.335	92.3914	88.9832	105.666	104.844	124.382
LOC551602	ras GTPase-activating protein-binding protein 2	551602	162.556	0.83131	0.2934	2.83336	0.00460608	0.0776222	194.359	182.5	247.544	134.26	118.591	98.0825	1.53336	1.68016	1.63151	1.01502	0.884366	0.826406
LOC411261	molybdenum cofactor sulfurase 1	411261	2022.32	-0.567928	0.200416	-2.83374	0.00460066	0.0776222	1964.5	1328.71	1594.1	2489.07	2060.25	2697.27	9.50374	6.10515	6.54273	10.3749	9.2827	13.0669
LOC551329	ATPase family AAA domain-containing protein 3A homolog	551329	2152.77	-0.47583	0.168079	-2.83099	0.00464036	0.0778074	1993.15	1638.77	1770.15	2824.13	2105.53	2584.88	13.7212	11.1262	11.6025	17.4133	13.5714	18.466
LOC100577530	uncharacterized LOC100577530	100577530	1793.72	0.798918	0.282195	2.83109	0.00463899	0.0778074	2167.38	3123.91	1542.88	1046.06	1461.9	1420.15	6.74916	9.23584	4.21106	2.89727	4.11594	4.14975
LOC410332	breast cancer anti-estrogen resistance protein 3	410332	9797.08	0.600405	0.212054	2.83138	0.00463482	0.0778074	9842.63	15810.5	9767.32	7641.16	7774.16	7946.72	44.7861	67.781	39.1584	29.8396	32.2407	36.0745
LOC725936	titin homolog	725936	76950.1	0.37114	0.13124	2.82795	0.00468473	0.0784203	85776.7	92677.4	81926.4	75434.4	59419.4	66466.2	32.8206	34.2684	28.7922	24.8837	20.3591	24.6919
LOC102655181	uncharacterized LOC102655181	102655181	122.995	1.0725	0.37956	2.82563	0.00471878	0.0788586	149.448	216.02	134.442	95.7334	84.0916	58.2365	3.02701	5.98397	2.76158	1.97923	1.66002	2.49073
LOC107964473	uncharacterized LOC107964473	107964473	1244.75	-0.735561	0.260791	-2.8205	0.00479493	0.0799979	1254.43	887.359	659.406	1469.86	1768.08	1429.35	2.70191	1.65615	1.5018	2.64032	2.27452	2.57676
LOC409616	uncharacterized protein MAL13P1.304	409616	11235.2	0.660485	0.234299	2.81898	0.00481771	0.0801113	9188.32	17433.4	14668.1	8564.63	8281.95	9274.93	25.2193	44.968	35.7714	20.423	20.9278	25.6613
LOC410228	cAMP-dependent protein kinase catalytic subunit PRKX	410228	6104.63	0.40265	0.142835	2.81899	0.00481753	0.0801113	6512.97	7689.21	6651.68	4714.28	5132.82	5926.84	24.7823	32.2709	25.6695	14.89	16.1835	20.9523
LOC413633	serine/threonine-protein kinase BRSK2	413633	18.0697	4.25114	1.5085	2.81812	0.00483059	0.0801926	9.29208	59.5918	34.144	0	5.39049	0	0.0400176	0.255541	0.125278	0	0.0168638	0
LOC725263	tumor protein p53-inducible nuclear protein 2	725263	33051.5	-0.270151	0.095895	-2.81716	0.0048451	0.0803005	31666.6	29729.8	28500.7	34340.3	36827.8	37243.8	77.1429	70.264	62.1899	72.5745	81.4527	92.4674
LOC551700	tRNA pseudouridine synthase A	551700	6151.81	-0.363816	0.129189	-2.81616	0.00486008	0.0804159	5821.49	5221.73	5096	7531.41	7051.84	6188.39	28.5769	26.4082	24.8493	24.3328	27.2625	27.8914
LOC410107	broad-complex core protein isoforms 1/2/3/4/5	410107	24.4171	2.31338	0.821779	2.81508	0.00487645	0.0805538	34.8453	54.9362	32.01	15.1772	6.46859	3.06508	0.150913	0.290988	0.192835	0.0872776	0.0227543	0
LOC102654345	uncharacterized protein C6orf203 homolog	102654345	1015.85	-0.41048	0.14591	-2.81325	0.00490438	0.0808819	844.03	826.836	946.43	1255.04	1065.16	1157.58	19.6253	17.3568	18.1126	26.1348	21.9057	23.2261
LOC725015	monocarboxylate transporter 3	725015	14264.7	0.332425	0.11825	2.81119	0.00493579	0.0812455	15577.4	16541.4	15584.6	11791.5	11955	14138.2	26.1417	30.2045	28.2953	17.061	16.2621	19.8531
LOC100576687	uncharacterized LOC100576687	100576687	265.789	0.955658	0.340001	2.81075	0.00494263	0.0812455	374.006	325.893	352.11	234.663	107.81	200.252	2.07762	1.48738	1.52619	1.44993	0.274061	1.02307
LOC100576277	uncharacterized LOC100576277	100576277	528.648	0.791891	0.281906	2.80907	0.00496856	0.0814048	714.716	727.206	568.711	372.426	274.915	513.911	3.43373	3.37125	2.97221	1.85161	1.45075	2.77426
LOC409897	probable multidrug resistance-associated protein lethal(2)03659	409897	1716.74	1.26887	0.451663	2.80933	0.00496445	0.0814048	1135.96	4217.98	1925.94	767.034	813.964	1439.56	4.24027	14.9688	6.38799	2.51687	2.78513	5.37894
LOC726417	uncharacterized LOC726417	726417	1703.28	0.310495	0.110618	2.80692	0.00500181	0.081816	1812.73	1986.08	1858.72	1562.09	1529.82	1470.22	15.5524	16.9013	14.4766	11.7919	12.075	12.298
LOC100576742	integrin beta-nu	100576742	1430.1	2.16903	0.773244	2.80511	0.00502996	0.0820089	789.827	3722.63	2507.45	215.984	549.83	794.877	3.33965	15.5986	9.90317	0.794084	2.26944	3.35687
TpnCIIIb	troponin C type IIIb	408380	51571.2	-0.333152	0.118824	-2.80373	0.00505146	0.082162	44602.8	44002	48324.5	63017.1	51653.8	57826.8	67.9055	137.588	76.5034	38.9291	95.5595	86.4373
LOC551268	pancreatic triacylglycerol lipase	551268	91.4727	-2.90488	1.03649	-2.80262	0.00506892	0.0822429	3.09736	22.3469	39.479	87.561	369.788	26.564	0.0560307	0.366465	0.531344	1.07424	1.3727	0.553968
LOC410166	myelin regulatory factor-like protein	410166	3183.59	0.473207	0.169049	2.79924	0.00512238	0.082842	3129.11	3844.6	4130.36	2770.43	2304.97	2922.04	7.73857	10.0397	10.2523	5.91963	5.03759	6.16367
LOC412209	probable cytochrome P450 6a17	412209	36593.3	-0.835725	0.298873	-2.79625	0.00516992	0.083229	30704.9	32961.7	15176	54901.9	50076.6	35738.8	308.744	315.194	138.89	478.94	462.055	360.643
LOC724776	uncharacterized LOC724776	724776	1945.2	-0.592783	0.211998	-2.79617	0.0051712	0.083229	1871.58	1469.31	1311.34	2278.92	2800.9	1939.17	8.34564	6.92984	6.06016	8.22393	8.81907	9.03729
LOC413677	rho guanine nucleotide exchange factor 10	413677	10331.2	0.466929	0.166951	2.7968	0.00516108	0.083229	9941.75	12181.9	13843.3	7917.85	9703.96	8398.31	25.0777	31.0281	32.7343	17.5182	21.7336	19.984
LOC100578321	host cell factor 2	100578321	2924.15	0.329545	0.117898	2.79517	0.00518731	0.0833545	3071.81	3266.38	3432.54	2515.92	2804.13	2454.11	10.0248	11.1223	10.7951	6.92581	7.95357	7.898
LOC100577913	protein roadkill	100577913	6186.85	1.79364	0.642347	2.79232	0.0052332	0.0839573	4313.07	17426.9	7071.01	1891.32	3115.7	3303.13	37.8653	140.493	56.869	14.2685	24.8999	28.4398
LOC413210	cadherin-89D	413210	58.2382	2.30199	0.825103	2.78994	0.00527178	0.0843063	44.9117	42.8316	202.73	30.3545	19.4058	9.19523	0.0987382	0.0887681	0.391561	0.0499409	0.0416242	0.0218347
LOC411155	teneurin-a	411155	373.055	0.734186	0.263252	2.78891	0.00528859	0.0843063	489.383	491.632	417.197	200.807	307.258	332.05	0.605693	0.591726	0.477494	0.213273	0.355587	0.393477
LOC412642	UPF0428 protein CXorf56 homolog	412642	1692.92	-0.291918	0.104665	-2.78908	0.00528585	0.0843063	1519.25	1466.52	1581.3	1872.64	1832.77	1885.02	28.1527	25.4253	27.4488	30.6513	34.0034	37.44
LOC412323	stomatin-like protein 2, mitochondrial	412323	3143.1	-0.308546	0.110616	-2.78934	0.00528149	0.0843063	2834.86	2994.49	2594.95	3368.18	3497.35	3568.77	31.5121	32.4705	26.7206	32.3197	35.9557	39.7243
LOC409783	uncharacterized LOC409783	409783	2878.81	0.408013	0.146596	2.78324	0.00538196	0.0846366	2820.15	3723.56	3306.64	2458.71	2390.14	2573.64	8.12648	10.2744	8.79216	5.95151	6.19089	7.13314
LOC410462	uncharacterized LOC410462	410462	4369.44	0.844295	0.303098	2.78555	0.00534365	0.0846366	6455.67	7236.68	3145.52	2611.65	3171.76	3595.34	18.9694	20.294	8.2598	6.46169	8.27088	10.2285
LOC409902	liprin-alpha-1	409902	4057.12	0.325284	0.116895	2.7827	0.00539091	0.0846366	4546.92	4884.67	4105.82	3475.59	3595.46	3734.29	5.04386	5.26709	4.24608	2.97185	3.35521	3.87075
LOC727246	protein spire	727246	9745.85	0.429508	0.154245	2.78457	0.00535979	0.0846366	9443.85	11170.7	12944.9	7699.53	8371.43	8844.79	26.6459	29.8136	30.2898	18.302	22.1353	25.7053
LOC102656661	uncharacterized LOC102656661	102656661	3636.67	0.53269	0.191341	2.78398	0.00536961	0.0846366	4131.1	5281.32	3489.09	2863.83	2736.21	3318.46	9.87176	11.6082	7.17368	5.74974	5.82714	7.62936
LOC100576293	zinc finger protein 182	100576293	1496.93	0.59356	0.213317	2.78253	0.00539372	0.0846366	1395.36	1946.98	2060.38	1128.95	1052.22	1397.68	5.53566	7.30698	7.32993	3.70956	3.8568	5.52902
LOC410291	dipeptidase 1	410291	246.557	0.800068	0.287082	2.78689	0.00532158	0.0846366	272.568	295.166	372.383	176.289	141.231	221.707	1.94319	1.93374	2.28558	1.01151	0.933403	1.60076
LOC412436	protein CASC1	412436	1568.09	0.845757	0.303903	2.78298	0.00538616	0.0846366	1394.59	3000.08	1650.65	953.831	1156.8	1252.6	5.5653	12.0734	6.17964	3.31669	4.10356	4.87519
LOC113218591	uncharacterized LOC113218591	113218591	36.6842	1.87022	0.672309	2.78179	0.00540597	0.0846963	33.2966	88.4566	51.216	9.33984	19.4058	18.3905	0.196632	0.523331	0.326824	0.0767668	0.124277	0.128559
LOC102655611	uncharacterized LOC102655611	102655611	85.7136	1.4207	0.510923	2.78067	0.00542476	0.0848582	67.3676	154.566	152.581	46.6992	60.3735	32.6942	0.676933	1.9413	1.12151	0.499721	0.699868	0.389199
TpnCIIb	troponin C type IIb	494501	13420.5	-0.583734	0.210029	-2.7793	0.00544764	0.08492	11375.1	11991	8859.31	13831.1	13916.1	20550.3	315.258	330.49	221.773	317.326	340.466	550.878
LOC410432	L-threonine 3-dehydrogenase, mitochondrial	410432	142.148	-3.18605	1.1463	-2.77942	0.00544562	0.08492	10.8408	66.1097	7.469	452.982	308.336	7.15185	0.116158	0.897396	0	5.2436	3.52086	0.101344
LOC100576439	coiled-coil domain-containing protein 40	100576439	1285.76	0.485913	0.174857	2.77891	0.00545412	0.08492	1400.01	1670.43	1430.85	901.295	1208.55	1103.43	0.216669	0.853994	0.501225	0.16931	0.0547172	0.340336
LOC724439	uncharacterized LOC724439	724439	2450.95	1.92643	0.693659	2.77719	0.00548305	0.0852381	1535.52	7548.61	2558.67	947.994	1113.68	1001.26	4.97336	25.7439	7.29952	2.33262	3.05013	3.05501
LOC102656171	uncharacterized LOC102656171	102656171	34.3085	1.87666	0.676099	2.77571	0.00550805	0.085362	27.1019	64.2474	70.422	19.8472	14.0153	10.2169	0.346042	0.96544	0.756311	0.152884	0.294662	0.156718
LOC107965276	uncharacterized LOC107965276	107965276	106.875	-1.3853	0.499064	-2.77579	0.00550678	0.085362	85.1774	57.7296	34.144	157.61	99.185	207.404	0.432513	0.78332	0.697113	0.709666	0.618057	0.663888
LOC727280	uncharacterized LOC727280	727280	1304.4	0.859718	0.309818	2.77491	0.00552162	0.0854403	1122.79	2265.42	1658.12	679.473	1171.89	928.719	7.17127	14.1305	9.6787	3.5256	7.25183	5.73057
LOC102655821	uncharacterized LOC102655821	102655821	398.885	1.03879	0.374528	2.7736	0.005544	0.0855226	552.104	494.426	563.376	166.95	417.224	199.23	1.17612	1.02528	1.16606	0.167932	0.683396	0.457223
LOC410207	dihydropyrimidine dehydrogenase [NADP(+)]	410207	288.846	1.56342	0.563627	2.77385	0.0055397	0.0855226	153.319	503.737	638.066	113.246	230.713	93.9957	0.505689	1.62685	1.99109	0.300313	0.708281	0.273101
LOC408578	armadillo repeat-containing protein 6 homolog	408578	7787.9	0.465351	0.168032	2.76941	0.00561579	0.0862898	9136.44	7383.8	10579.3	7109.95	6447.03	6070.9	89.7309	69.8305	94.8549	59.0571	57.2957	57.6338
LOC550749	C-1-tetrahydrofolate synthase, cytoplasmic	550749	3872.35	0.861296	0.310943	2.76995	0.00560647	0.0862898	3325.02	7807.46	3852.94	2668.86	2935.66	2644.14	15.1426	33.2867	15.8943	10.1367	12.4642	11.4532
LOC551350	myotrophin	551350	4851.76	-0.34451	0.124408	-2.76919	0.00561955	0.0862898	4781.55	4156.53	3886.02	5467.31	5241.71	5577.42	61.4391	49.2408	42.4242	60.4268	64.558	71.8362
LOC413947	sodium leak channel non-selective protein	413947	5647.31	0.694444	0.250884	2.76798	0.00564044	0.0864781	4426.9	7595.16	8921.19	4380.39	4304.85	4255.35	5.70171	9.54433	10.241	4.80957	5.11483	5.41796
LOC412046	trithorax group protein osa	412046	4358.75	0.384731	0.139023	2.76739	0.00565069	0.0865031	4377.34	5350.23	5082.12	4173.74	3628.88	3540.16	6.29217	7.88789	6.9222	4.74596	4.3906	4.8847
LOC409206	tripartite motif-containing protein 2	409206	1336.43	0.358973	0.129744	2.76677	0.00566144	0.0865355	1515.38	1537.28	1452.19	1230.52	1224.72	1058.47	7.28566	7.15939	6.35886	5.16414	5.27886	5.18218
LOC102655837	uncharacterized LOC102655837	102655837	123.849	1.05554	0.381607	2.76603	0.00567425	0.0865992	175.775	189.018	136.576	96.9008	92.7164	52.1063	2.85243	1.69826	1.12188	1.32698	1.53951	0.358955
LOC411617	inactive rhomboid protein 1	411617	214.693	0.730437	0.264304	2.76362	0.00571635	0.0869361	271.019	268.163	264.616	136.595	202.682	145.08	0.329533	0.285658	0.283169	0.135356	0.257783	0.161478
LOC412956	heparan sulfate glucosamine 3-O-sulfotransferase 1	412956	232.574	0.905124	0.327468	2.76401	0.00570966	0.0869361	226.882	394.796	288.09	157.61	197.292	130.777	0.589595	0.758782	0.576079	0.345936	0.493805	0.350706
LOC725438	protein I'm not dead yet-like	725438	116.182	-1.38507	0.501359	-2.76262	0.00573386	0.0869361	62.7215	33.5204	97.0971	141.265	132.606	229.881	0.422264	0.287542	0.667668	0.57492	0.783398	1.42943
LOC724785	ran-binding protein 3	724785	16210.8	0.249356	0.0902396	2.76326	0.00572265	0.0869361	17936	17217.4	17671.7	14326.1	14412	15701.4	21.6097	25.6895	23.9411	22.2096	25.3861	24.8898
LOC551670	argininosuccinate lyase	551670	1781.33	0.443461	0.160541	2.76229	0.00573967	0.0869361	1780.21	2411.61	1967.55	1464.02	1553.54	1511.08	1.7231	4.16588	1.43898	0.816035	1.26227	0.519716
LOC550829	DNA-directed RNA polymerase II subunit RPB1	550829	4101.17	0.255071	0.0923846	2.76096	0.00576312	0.0871596	4272.03	4501.04	4615.85	3812.99	3726.98	3678.09	6.90093	7.85921	7.56587	5.35944	5.34069	5.49599
LOC409613	GTP-binding protein SAR1	409613	13096.2	-0.263805	0.0955797	-2.76006	0.00577911	0.0872697	12246.2	12415.6	11043.5	14458.1	14090.7	14323.1	192.874	188.56	161.447	200.558	203.353	224.387
LOC408557	thioredoxin domain-containing protein 5 homolog	408557	12958.2	0.776214	0.281393	2.75847	0.00580733	0.0875641	11627.5	24612.3	12847.8	8892.7	9535.78	10233.3	40.7968	33.7933	28.987	34.7428	32.5779	40.6388
LOC410992	ubiquitin-conjugating enzyme E2 C	410992	2822.47	0.941114	0.341366	2.75691	0.00583509	0.0878506	2114.72	5920.07	3100.7	1780.41	2003.11	2015.8	34.6846	92.386	45.7061	26.9978	32.4228	38.3306
LOC724460	uncharacterized LOC724460	724460	8407.33	0.379395	0.137689	2.75545	0.00586112	0.0881102	8684.22	9402.47	10434.2	6451.5	7559.62	7911.99	7.68887	8.77952	9.47228	5.15294	5.53327	7.36551
LOC726243	flotillin-2	726243	1994.98	0.578436	0.210149	2.7525	0.00591421	0.0886425	1976.89	2271.94	2920.38	1908.83	1453.28	1438.54	7.152	8.00674	10.0146	7.01709	4.37441	5.69402
LOC409198	26S proteasome regulatory subunit 6A-B	409198	12014.7	-0.332328	0.120939	-2.74789	0.00599796	0.0895305	11494.3	10943.5	9471.77	13221.7	12816.4	14140.2	131.891	122.405	100.049	133.488	133.246	165.815
LOC724283	NPC intracellular cholesterol transporter 1	724283	5913.66	-0.33192	0.120839	-2.74679	0.0060181	0.0895305	5663.52	4811.11	5233.64	6953.51	6092.33	6727.85	16.4416	11.3291	13.0542	18.178	14.7699	17.124
LOC410041	uncharacterized LOC410041	410041	2796.79	0.427765	0.155712	2.74716	0.00601143	0.0895305	2932.43	3677	3016.41	2132.99	2407.39	2614.51	15.2438	18.319	14.0524	9.24311	10.9413	12.0134
LOC550687	aldehyde dehydrogenase, mitochondrial	550687	39655	-0.455566	0.165739	-2.74869	0.00598346	0.0895305	36147.7	35293.2	28894.4	51551.3	38048.2	47995	311.991	290.893	226.658	383.789	300.021	407.42
LOC411711	integrator complex subunit 6	411711	589.339	0.502331	0.182865	2.747	0.00601434	0.0895305	629.538	778.418	664.741	500.849	528.268	434.219	2.77001	3.45869	2.59715	1.88169	2.16978	1.85851
LOC408951	14-3-3 protein epsilon	408951	19287.2	-0.235175	0.0857385	-2.74293	0.00608939	0.0904567	17832.3	16890.6	18433.5	21197.9	20496.8	20872.2	83.8326	75.3503	78.622	85.7515	88.5096	96.8372
LOC100577769	uncharacterized LOC100577769	100577769	1764.97	0.342167	0.124803	2.74166	0.00611305	0.0905988	1801.89	1971.19	2147.87	1557.42	1530.9	1580.56	5.01514	5.95053	5.88873	3.84238	4.03894	4.68143
LOC113219108	uncharacterized LOC113219108	113219108	501.379	-0.695572	0.253725	-2.74144	0.00611702	0.0905988	417.369	337.997	392.656	709.828	702.92	447.501	4.6394	2.87485	3.41851	6.23741	7.56306	5.09387
LOC414021	uncharacterized LOC414021	414021	1029.61	0.620535	0.22646	2.74015	0.00614113	0.0908217	1046.13	1072.65	1625.04	758.862	886.197	788.747	1.53791	1.49914	2.97264	0.84673	0.973859	1.00471
LOC410489	myosin-IIIb	410489	260.364	0.974027	0.355828	2.73735	0.0061936	0.0914628	219.913	481.39	333.971	203.142	154.168	169.601	0.565643	1.13448	0.743432	0.388471	0.327545	0.347344
LOC552735	uncharacterized LOC552735	552735	81.4394	1.43155	0.523137	2.73646	0.00621039	0.0915758	63.4959	162.015	131.241	30.3545	46.3582	55.1714	0.234924	0.452937	0.200066	0.0815148	0.138605	0.225231
LOC408397	26S proteasome non-ATPase regulatory subunit 11	408397	10844.3	-0.248954	0.0910388	-2.73459	0.0062458	0.0917537	10120.6	10238.6	9372.53	12044.9	11436.5	11852.7	88.3922	84.2782	73.6737	90.7649	91.1484	102.178
LOC409796	eukaryotic translation initiation factor 3 subunit J	409796	9196.75	-0.26186	0.095766	-2.73437	0.0062499	0.0917537	8046.17	8193.87	8853.97	10446.6	9741.69	9898.16	168.483	165.473	167.547	187.895	183.946	205.403
LOC409367	calcyphosin-like protein	409367	3662.48	-1.83616	0.671307	-2.73519	0.00623434	0.0917537	1910.3	1700.23	1197.17	8172.36	7359.1	1635.73	19.0789	16.2211	10.8728	71.0828	67.3651	15.6881
LOC113218833	transmembrane protein 234 homolog	113218833	946.778	0.620237	0.227284	2.72891	0.00635437	0.093151	1189.39	1370.61	881.343	763.532	633.922	841.875	49.612	50.4978	31.6516	24.632	21.7382	36.3388
LOC100579052	mitochondrial-processing peptidase subunit beta	100579052	183.662	-0.867414	0.317939	-2.72824	0.00636741	0.0932058	154.868	114.528	120.571	199.639	204.839	307.529	0.963061	0.966746	0.699643	1.212	1.01389	2.39399
LOC552485	glycylpeptide N-tetradecanoyltransferase 1	552485	6464.73	-0.277211	0.101664	-2.72675	0.00639622	0.0933276	5747.15	5988.98	5800.22	7575.78	6617.37	7058.87	46.1118	46.192	41.9595	52.0704	48.929	55.5473
LOC102656934	stress-induced-phosphoprotein 1	102656934	11961.2	-0.28811	0.105713	-2.72541	0.00642226	0.0933276	11252.7	10578.5	10480.1	14061.1	12134	13260.5	60.7112	54.2299	52.6504	65.9672	57.9063	70.2047
LOC725799	uncharacterized LOC725799	725799	2534.03	0.5575	0.204417	2.72726	0.0063862	0.0933276	2510.41	3262.65	3279.96	2490.24	1663.51	1997.41	7.17554	11.6789	11.8145	5.23902	3.29192	4.31088
LOC412099	GRAM domain-containing protein 2B	412099	2126.07	0.827254	0.303482	2.72587	0.00641315	0.0933276	1938.95	4160.25	2059.31	1410.32	1560.01	1627.56	2.9807	9.8068	4.53635	2.50686	2.33087	3.12501
LOC409472	protein Smaug homolog 1	409472	4505.69	-0.550917	0.202107	-2.72586	0.00641333	0.0933276	4237.19	3492.64	3236.21	5740.5	6216.31	4111.29	6.18096	4.9311	3.9251	7.46566	9.04673	5.88484
LOC410825	leucine-rich repeat and immunoglobulin-like domain-containing nogo receptor-interacting protein 3	410825	7930.07	0.324066	0.119079	2.72143	0.00649999	0.0940482	9245.62	9229.28	7974.76	7560.6	6699.3	6870.88	20.4271	20.6863	17.1595	13.9099	11.7849	14.2199
LOC412540	carcinine transporter	412540	262.912	2.17415	0.798742	2.72197	0.00648938	0.0940482	54.2038	975.816	261.415	81.7236	77.6231	126.69	0.341114	5.94077	1.51439	0.495316	0.507568	0.910083
ACSF2	acyl-CoA synthetase family member 2	552475	1415.39	2.70772	0.994867	2.72169	0.00649488	0.0940482	851.774	3039.18	3474.15	65.3789	709.388	352.484	5.82561	20.4893	22.3443	0.44473	4.57237	2.55846
LOC412143	rho guanine nucleotide exchange factor 18	412143	2609.51	0.450136	0.165467	2.7204	0.00652023	0.0942051	2999.02	2965.62	3076.16	1772.23	2366.43	2477.6	6.30726	5.84527	5.90528	3.18082	4.587	4.92416
LOC411536	E3 ubiquitin-protein ligase HERC2	411536	5517.66	0.29037	0.106833	2.71799	0.00656806	0.0946235	5689.85	5922.87	6601.53	5003.82	5017.47	4870.41	5.18709	5.1239	5.4345	3.85126	4.05693	4.139
LOC727230	eukaryotic translation initiation factor 4E transporter	727230	6568.5	0.377237	0.138842	2.71703	0.0065871	0.0947616	6851.36	6859.58	8557.35	5559.54	6078.32	5504.88	4.88673	5.49863	5.85788	3.63126	3.72687	3.80876
LOC102654555	leucine-rich repeat-containing protein 59	102654555	1679.89	-0.364913	0.134377	-2.7156	0.00661568	0.0950364	1361.29	1448.83	1596.23	2050.1	1815.52	1807.37	15.2561	16.1648	16.3075	20.4338	18.555	19.915
LOC409831	proteasome subunit beta type-6	409831	11365.2	-0.405316	0.149318	-2.71445	0.0066386	0.0952292	10754	10519.8	8062.26	12343.8	13011.6	13499.6	245.879	233.229	169.082	243.827	268.849	307.785
LOC113218567	CCR4-NOT transcription complex subunit 6-like	113218567	180.063	0.792283	0.292083	2.71253	0.00667721	0.0956462	259.404	243.954	181.39	110.911	149.856	134.863	3.57807	2.28324	3.57964	1.98574	2.72851	2.71603
LOC552800	metal transporter CNNM4	552800	1256.56	0.354791	0.130947	2.70943	0.0067399	0.0964065	1385.29	1361.3	1484.2	1201.34	1044.68	1062.56	4.65599	4.81618	4.70165	3.77981	3.28313	3.7547
LOC100577098	enolase-phosphatase E1	100577098	17334.8	-0.744975	0.275621	-2.7029	0.00687383	0.0979758	14577.7	8891.28	15399	26961.8	23075.6	15103.7	120.557	69.1495	114.962	191.804	173.028	123.495
LOC102656849	uncharacterized LOC102656849	102656849	66.4568	1.41373	0.523091	2.70265	0.00687892	0.0979758	144.802	89.3877	55.484	38.5268	39.8896	30.6508	3.10159	1.32388	0.463543	0.940778	0.518369	0.351936
LOC411291	leucine-rich repeat-containing protein 58	411291	814.059	1.44338	0.534025	2.70284	0.00687499	0.0979758	390.267	1597.81	1583.43	258.013	692.139	362.701	2.52593	11.0514	10.316	1.38437	4.03189	2.43447
LOC410556	UPF0415 protein C7orf25 homolog	410556	2624.96	-0.249252	0.0922741	-2.70122	0.00690862	0.0982592	2432.2	2379.95	2383.68	2893.02	2884.99	2775.94	20.4241	18.9137	18.1118	20.8093	22.0182	23.071
LOC102655449	uncharacterized LOC102655449	102655449	98.0749	-0.930857	0.345014	-2.69803	0.00697517	0.0989383	60.3985	63.3163	78.9581	142.433	140.153	103.191	0.232715	0.262586	0.205751	0.699342	0.652724	0.577999
LOC724542	U3 small nucleolar RNA-associated protein 4 homolog	724542	978.724	-0.407795	0.151148	-2.69798	0.0069761	0.0989383	950.889	817.525	754.37	1107.94	1113.68	1127.95	6.68641	5.17269	4.64025	6.53838	6.93082	7.64385
LOC113218924	uncharacterized LOC113218924	113218924	1584.3	-0.318284	0.118087	-2.69534	0.0070317	0.099586	1381.42	1484.21	1364.69	1845.79	1774.55	1655.14	17.0158	18.8932	15.4523	19.8377	19.1328	22.4632
LOC725396	THO complex subunit 4	725396	3302.46	-0.290338	0.107806	-2.69314	0.00707824	0.100069	3126.01	2922.79	2863.83	3859.69	3455.3	3587.16	43.8007	37.8702	34.4625	45.8803	41.453	47.7731
LOC551659	serine/threonine-protein kinase STE20	551659	631.09	0.578725	0.214917	2.69279	0.00708576	0.100069	738.72	820.318	708.488	562.725	566.001	390.287	6.83331	5.11169	3.75741	4.52729	4.76991	3.51682
LOC410993	valacyclovir hydrolase	410993	2228.35	0.557438	0.207157	2.6909	0.00712591	0.100387	2040.39	3001.01	2920.38	1584.27	1735.74	2088.34	39.1858	59.3738	52.4849	26.3365	30.8425	41.5189
LOC551735	fibrosin-1-like protein	551735	3161.87	0.473748	0.1761	2.69022	0.00714047	0.100417	3062.51	3691.9	4275.47	2694.54	2917.33	2329.46	5.42187	6.6817	8.28796	4.63239	4.94539	5.05755
LOC413721	uncharacterized LOC413721	413721	3193.68	0.519171	0.193212	2.68705	0.00720855	0.101233	3190.28	4702.17	3394.13	2876.67	2356.72	2642.1	11.239	16.1045	10.7093	8.78071	7.70235	9.32582
LOC411288	cAMP-specific 3',5'-cyclic phosphodiesterase	411288	28480.3	0.612364	0.228153	2.684	0.0072746	0.102017	25273.7	34363.1	43670.2	26973.5	19942.7	20658.6	71.6695	89.6055	107.066	66.707	53.1818	59.507
LOC411477	ADP-ribosylation factor GTPase-activating protein 1	411477	3888.95	-0.24647	0.0919403	-2.68076	0.00734551	0.102868	3530.22	3532.68	3609.66	4362.87	4258.49	4039.77	35.5906	34.3793	33.0245	38.1868	38.5746	40.0964
LOC551685	uncharacterized LOC551685	551685	4860.38	0.614383	0.229424	2.67793	0.00740777	0.103313	4149.69	7556.06	5934.66	3512.95	4195.96	3812.96	17.2567	30.2696	21.5707	12.4113	16.233	15.8234
LOC102655631	facilitated trehalose transporter Tret1-like	102655631	8613.24	2.7809	1.03845	2.67792	0.00740805	0.103313	3350.57	25655.2	16109.6	448.312	2557.25	3558.56	8.45222	62.1214	37.3691	0.979557	6.01717	9.10537
LOC409748	protein kinase C and casein kinase substrate in neurons protein 1	409748	17063.8	0.30053	0.112422	2.67324	0.00751224	0.104473	17604.6	20492.1	18407.9	14382.2	16149.9	15345.8	97.2773	110.984	91.938	67.2109	80.2683	82.4874
LOC725756	beta-galactosidase	725756	2043.25	2.86344	1.07222	2.67058	0.00757211	0.10516	1259.08	7503.91	2015.56	88.7285	833.37	558.866	0.418909	2.50072	1.83325	0.25825	3.84561	0.0288329
LOC409544	ruvB-like 1	409544	3734.15	-0.361904	0.135628	-2.66836	0.0076222	0.105563	3444.26	3060.6	3299.17	4682.76	3729.14	4188.94	39.3237	33.4327	32.8939	47.2927	39.621	48.7073
LOC102653912	uncharacterized LOC102653912	102653912	229.486	0.855236	0.320484	2.66858	0.00761726	0.105563	302.767	332.411	251.812	109.743	177.886	202.295	1.37556	1.27728	0.991194	0.439661	0.747726	0.806013
LOC552065	integrator complex subunit 14	552065	2689.99	-0.296545	0.111231	-2.66603	0.00767532	0.105824	2583.97	2385.53	2272.71	3054.13	2841.87	3001.73	24.6167	21.8952	19.6716	25.0344	24.9972	28.7654
LOC410495	cytochrome P450 307a1	410495	473.056	0.859008	0.322303	2.66522	0.00769379	0.105824	416.595	732.793	680.746	244.003	429.083	335.115	0.761315	1.37805	1.23377	0.391514	0.716616	0.670976
LOC551548	L-asparaginase	551548	3975.63	0.488974	0.183452	2.6654	0.00768963	0.105824	3882.54	4881.87	5165.35	2959.56	3936.14	3028.3	18.2326	21.4989	21.8336	11.896	17.0561	14.2225
LOC100579022	E3 ubiquitin-protein ligase MARCH3	100579022	573.251	-1.07645	0.403618	-2.667	0.00765324	0.105824	470.024	461.837	173.921	563.893	942.258	827.571	0.0705718	0	0.0912417	0	0	0
LOC100577091	uncharacterized LOC100577091	100577091	42.7559	1.32087	0.496308	2.66139	0.00778188	0.106743	62.7215	73.5586	46.948	19.8472	25.8744	27.5857	0.300346	0.669692	0.370454	0.150563	0.146141	0.264782
LOC410867	uncharacterized LOC410867	410867	15045.5	0.501497	0.188506	2.66038	0.00780528	0.106772	14295.9	20573.1	18034.4	14695.1	10993.4	11681	21.93	31.0669	25.2696	18.5043	16.6301	17.2782
LOC102655581	uncharacterized LOC102655581	102655581	3746.51	-0.381922	0.143537	-2.66079	0.00779582	0.106772	2809.31	3725.42	3226.61	4143.39	4223.99	4350.37	31.8004	35.6997	26.1874	30.473	35.6065	42.8213
LOC727534	ADP-ribose pyrophosphatase, mitochondrial	727534	1618.7	-0.268081	0.100884	-2.65732	0.00787657	0.1076	1482.86	1481.42	1441.52	1794.42	1765.92	1746.07	27.6703	27.5241	25.4089	30.4234	31.1447	33.3753
LOC100578925	protein Tob1	100578925	49625.8	-0.335354	0.126262	-2.656	0.00790728	0.107873	44300	46359.6	40991	61309	55483.2	49312	40.3499	41.4533	32.6909	54.6341	52.1393	45.8244
LOC409346	TBC1 domain family member 1	409346	4204.25	0.558884	0.210681	2.65274	0.00798404	0.108661	3592.94	5391.2	6042.43	3532.79	3195.48	3470.69	11.0225	15.5524	17.0683	9.32789	8.03824	9.64875
LOC724924	protein FAM117B	724924	1634.82	0.320825	0.120946	2.65263	0.00798672	0.108661	1806.53	1836.17	1804.3	1587.77	1371.34	1402.78	4.00853	4.03521	3.57027	3.55433	2.58692	2.54075
LOC726088	serine/threonine-protein phosphatase 2A 65 kDa regulatory subunit A alpha isoform	726088	14514.6	-0.230447	0.0869165	-2.65136	0.00801682	0.108922	13022.1	13672.6	13379.1	16133.4	14936	15944.5	93.3205	93.7992	86.9594	99.2712	97.2042	112.675
LOC408853	X-box-binding protein 1	408853	20385.4	-0.397583	0.149999	-2.65057	0.00803556	0.109029	15952.2	15956.6	20874.8	24065.3	23793.6	21670.1	131.241	124.929	170.253	185.405	194.234	187.173
LOC551579	band 4.1-like protein 5	551579	1087.97	0.774523	0.29236	2.64921	0.008068	0.109321	957.858	1149	2013.43	776.374	810.73	820.419	5.99622	6.68423	11.2754	4.15241	4.75509	4.81351
LOC410117	glycerophosphocholine phosphodiesterase GPCPD1	410117	12069	0.608054	0.22972	2.64694	0.00812238	0.10991	9684.67	16182	17860.5	9702.93	9258.71	9725.49	16.0963	35.5879	35.1325	14.9531	14.5186	16.244
Obp15	odorant binding protein 15	677664	43.8134	-4.48473	1.69703	-2.64269	0.00822513	0.110703	4.64604	6.51785	0	49.0342	202.682	0	0.264573	0	0	0.691148	5.98895	0
LOC113219321	uncharacterized LOC113219321	113219321	95.8387	0.928847	0.351454	2.64287	0.00822063	0.110703	150.222	98.6989	128.04	59.5415	70.0764	68.4534	1.34566	0.740482	0.732583	0.646251	0.714531	0.92819
LOC409556	protein SMG7	409556	2999.61	0.374359	0.141646	2.64293	0.0082193	0.110703	3112.85	3218.89	3829.47	2385.16	2706.03	2745.29	12.0988	11.8633	13.6261	8.02782	9.72661	10.5453
LOC102655979	pupal cuticle protein PCP52	102655979	151.358	-0.985726	0.37402	-2.63549	0.00840165	0.112339	129.315	103.355	71.489	187.964	257.665	158.362	2.00291	1.46867	0.840069	2.50185	3.45849	2.24697
LOC102653714	uncharacterized LOC102653714	102653714	124.691	1.08242	0.41066	2.6358	0.00839392	0.112339	119.248	156.428	232.606	91.0634	90.5602	58.2365	1.42142	2.38749	3.72118	1.02155	1.29935	0.83427
LOC408749	ubiquitin-protein ligase E3B	408749	3967.92	0.284666	0.10799	2.63604	0.00838805	0.112339	4051.35	4542.01	4481.4	3710.25	3620.25	3402.24	11.1886	11.9202	11.0025	8.66652	9.02314	9.18888
LOC411088	probable maleylacetoacetate isomerase 2	411088	12956	-0.508872	0.193088	-2.63544	0.00840277	0.112339	9392.74	13375.6	9314.92	14971.8	17328.3	13352.5	28.1617	28.889	16.2381	21.9768	21.128	28.4906
LOC552642	DNA replication licensing factor Mcm3	552642	2086.93	0.463142	0.175632	2.63699	0.00836442	0.112339	2299.02	2085.71	2873.43	1594.78	1732.5	1936.11	14.1102	12.2612	15.787	8.71334	9.79945	11.7863
LOC409250	beta-ureidopropionase	409250	10274.5	0.875047	0.332235	2.63382	0.0084431	0.112728	7383.33	20844.1	11667.7	7317.77	6475.06	7958.99	85.6257	230.545	121.666	71.8867	68.2812	91.4837
LOC100577781	uncharacterized LOC100577781	100577781	473.266	1.80198	0.684466	2.63268	0.00847148	0.112957	267.147	995.369	944.296	141.265	431.239	60.2799	0.786634	3.08472	2.63008	0.381652	1.24461	0.191136
LOC113219412	fibroblast growth factor 17-like	113219412	1809.53	0.615893	0.23404	2.63157	0.00849904	0.113024	1663.28	2452.58	2455.17	1181.49	1342.23	1762.42	4.37825	6.16405	5.70235	2.84295	3.3683	4.76674
Hsc70-3	heat shock 70 kDa protein cognate 3	409587	34787.2	-0.399173	0.151726	-2.63088	0.00851635	0.113104	29388.5	25455.9	35171.5	41897.4	39367.8	37442	157.48	129.657	172.995	199.488	197.513	200.735
LOC727332	protein BUD31 homolog	727332	5133.3	0.877027	0.333521	2.6296	0.00854852	0.113381	3579.77	10215.3	6146.99	3382.19	3490.88	3984.6	70.5575	76.1945	83.6569	73.4986	73.9687	92.3482
LOC725503	uncharacterized LOC725503	725503	4612.85	0.444477	0.169065	2.62903	0.00856279	0.11342	4454.78	5452.65	6046.69	4423.58	3523.22	3776.18	6.96437	8.00158	9.01452	6.16459	5.56487	6.13365
LOC724157	uncharacterized LOC724157	724157	1535.51	0.619353	0.235725	2.62744	0.008603	0.113618	1363.61	2425.57	1791.49	1238.7	1286.17	1107.51	6.81292	6.60746	5.66114	7.19463	6.49777	6.22087
LOC100578345	uncharacterized LOC100578345	100578345	62.8605	-1.15306	0.438987	-2.62665	0.00862301	0.113618	45.6861	30.727	40.546	71.2163	77.6231	111.364	0.203212	0.150018	0.164067	0.314385	0.359103	0.500025
LOC100578529	zinc finger protein 701	100578529	1253.53	0.47537	0.180897	2.62785	0.00859276	0.113618	1191.71	1455.34	1728.54	1037.89	1053.3	1054.39	1.59112	1.97392	2.16827	1.09954	1.14532	1.09038
LOC100576919	uncharacterized LOC100576919	100576919	1094.08	0.507878	0.193491	2.62482	0.00866953	0.113931	1194.81	1125.73	1534.35	795.054	1013.41	901.133	3.69218	3.3533	4.28628	2.08097	2.82016	2.69254
LOC410399	protein bowel	410399	949.843	0.83033	0.316537	2.62317	0.00871158	0.114037	921.464	1741.2	984.842	849.926	509.94	691.686	6.93866	14.8559	8.13552	6.8857	4.01525	7.83964
LOC551893	prefoldin subunit 3	551893	6091.42	-0.245383	0.0935446	-2.62316	0.00871172	0.114037	5909.76	5373.51	5439.57	6619.61	6516.02	6690.04	127.392	109.074	103.087	118.742	125.665	144.542
Fabp	fatty acid binding protein	408689	13839.7	-0.451802	0.172212	-2.62352	0.00870255	0.114037	12829.3	12829	9410.95	17555.4	16326.7	14087.1	435.902	1.19884	407.467	8.66173	295.001	521.231	8.8845	500.316	1.68742	454.793
LOC409898	protein expanded-like	409898	2250.96	0.493945	0.188391	2.62191	0.00874391	0.114309	2089.17	2900.45	2908.64	2081.62	1660.27	1865.61	4.76734	6.52692	6.15958	3.97802	3.03456	3.8941
LOC725420	sodium-dependent nutrient amino acid transporter 1	725420	847.653	-1.5271	0.583271	-2.61817	0.00884038	0.11527	152.545	310.064	848.266	821.906	887.275	2065.86	1.17794	2.23072	6.34692	5.45421	5.7569	14.9941
LOC552343	electron transfer flavoprotein-ubiquinone oxidoreductase, mitochondrial	552343	4742.89	-0.304956	0.116474	-2.61824	0.0088385	0.11527	4408.32	4177.01	4144.23	5694.97	4760.88	5271.93	34.4444	31.461	29.4128	38.7749	34.4945	40.8876
LOC552114	signal recognition particle 54 kDa protein	552114	10970.4	-0.257022	0.0982019	-2.61728	0.00886334	0.115419	9788.43	10271.2	9927.37	12558.6	12181.4	11095.6	79.3787	80.1193	73.5749	88.0892	90.1544	88.1773
LOC409189	growth hormone-inducible transmembrane protein	409189	17571.2	-0.26354	0.100733	-2.61622	0.00889081	0.115536	14726.4	16756.5	16430.7	18866.5	18772.9	19874	180.65	194.513	181.771	200.14	210.598	239.804
LOC550824	nucleosome assembly protein 1-like 1	550824	9684.59	-0.223293	0.0853577	-2.61597	0.00889743	0.115536	9137.21	8913.63	8757.94	10862.2	10205.3	10231.2	80.0059	75.1145	69.5679	80.6888	81.0289	88.6244
LOC552257	bromodomain-containing protein DDB_G0270170	552257	5860.54	0.43667	0.16699	2.61494	0.0089242	0.115611	6311.64	8071.9	5838.63	4693.27	5491.83	4755.98	18.1958	22.3479	15.2957	11.5948	14.2371	13.3659
LOC411723	E3 ubiquitin-protein ligase Nedd-4	411723	3912.61	0.601889	0.230242	2.61416	0.00894478	0.115728	3469.04	4495.46	6187.54	3445.23	3096.3	2782.07	16.2148	21.2942	27.9752	14.1073	13.4562	13.0686
LOC409023	methylthioribose-1-phosphate isomerase	409023	2916.27	1.81167	0.693618	2.61191	0.00900381	0.116342	1643.15	8713.44	3261.82	1106.77	1241.97	1530.5	18.7402	91.692	33.1083	10.5031	12.7951	16.2941
LOC725882	uncharacterized LOC725882	725882	483.637	1.02312	0.391948	2.61033	0.00904542	0.116579	851	701.135	392.656	191.467	416.146	349.419	38.4556	29.9068	20.1623	8.63277	16.1092	17.8664
LOC102656753	uncharacterized LOC102656753	102656753	124.432	1.48476	0.569058	2.60915	0.00907679	0.116833	97.5668	254.196	198.462	37.3594	109.966	49.0412	0.286488	0.679031	0.483827	0.100722	0.283995	0.141669
LOC726908	vacuolar protein sorting-associated protein 13	726908	4623.21	0.257897	0.0989028	2.60758	0.0091185	0.117166	4920.93	4862.32	5323.27	4250.8	4335.03	4046.92	6.94508	6.73715	6.81021	5.32018	5.70991	5.72501
LOC727007	alpha-tocopherol transfer protein	727007	41043.7	-0.499156	0.191446	-2.6073	0.00912605	0.117166	38618.7	28570.5	34850.4	52333.5	37725.9	54163	140.569	98.1269	143.021	224.998	161.079	191.937
Sod1	superoxide dismutase 1	409398	45481.3	-0.332694	0.127679	-2.60571	0.00916832	0.117559	41355.2	44548.6	34876	49565.4	52358.9	50183.5	1078.11	1119.75	839.166	1111.97	1244.28	1299.29
LOC725498	protein mesh	725498	255.752	-0.757972	0.291149	-2.60338	0.00923088	0.11821	160.288	245.816	164.318	273.19	316.961	373.939	1.80947	2.70422	1.70457	2.77702	3.14853	4.52671
Obp21	odorant binding protein 21	551935	68.1881	-2.79431	1.07362	-2.60271	0.00924909	0.118292	13.9381	12.1046	25.608	14.0098	315.883	27.5857	0.549696	0.426397	0.833011	0.358518	9.58049	0.961427
LOC551036	vacuole membrane protein 1	551036	6620.05	-0.25941	0.0998012	-2.59927	0.00934235	0.119185	5965.51	5688.22	6426.55	7086.6	7448.58	7104.85	56.8551	53.3173	57.8231	59.6262	65.0014	67.551
LOC113219030	uncharacterized LOC113219030	113219030	828.327	-0.991675	0.381592	-2.59879	0.00935539	0.119195	638.83	552.155	471.614	1322.75	1473.76	510.846	10.265	9.78415	10.8122	9.48133	10.3935	10.3606
LOC102654192	transmembrane protein 17B	102654192	359.785	-0.602209	0.231921	-2.59662	0.00941473	0.119799	336.838	268.163	251.812	384.101	416.146	501.651	6.3712	4.88398	4.4764	7.08433	6.26645	8.66308
LOC414035	lachesin	414035	7339.34	-0.272904	0.105216	-2.59375	0.00949365	0.120569	7089.86	6708.73	6141.66	8184.04	7731.04	8180.69	40.1531	35.7239	30.7646	39.3798	39.421	45.0528
LOC107964030	uncharacterized LOC107964030	107964030	657.267	0.448022	0.172745	2.59354	0.00949928	0.120569	816.154	793.316	665.808	504.351	571.392	592.582	0.418734	0.201859	0.535112	0.340553	0.374962	0.638733
LOC411452	band 4.1-like protein 4A	411452	963.849	0.753494	0.290596	2.59293	0.00951624	0.120631	899.009	1340.82	1390.3	725.005	930.399	497.564	3.24791	5.31922	5.15371	2.26872	2.82099	1.56012
LOC551284	COP9 signalosome complex subunit 4	551284	4546.08	-0.274457	0.105875	-2.59226	0.00953472	0.120713	4145.04	3852.05	4348.03	5021.33	5167.32	4742.7	24.9697	22.4579	24.0387	26.043	28.5318	28.1007
LOC100577886	general transcription factor 3C polypeptide 1	100577886	1114.7	0.444998	0.171754	2.59091	0.00957231	0.121036	1279.21	1218.84	1358.29	896.625	822.589	1112.62	2.67615	2.36287	2.60194	1.63683	1.55925	2.28434
LOC100577054	uncharacterized LOC100577054	100577054	2008.78	-3.70578	1.43094	-2.58975	0.00960461	0.12113	203.651	70.7653	583.649	4867.22	6230.33	97.0608	4.31113	1.21613	26.5968	213.723	289.214	2.24825
LOC551747	basic-leucine zipper transcription factor A	551747	1182.28	0.395297	0.152663	2.58934	0.00961597	0.12113	1237.4	1534.49	1257.99	1030.88	971.366	1061.54	3.31915	4.3614	3.45724	2.50704	2.67087	2.96269
LOC100577875	tenascin	100577875	632.758	0.548343	0.211762	2.58943	0.00961344	0.12113	650.446	923.673	680.746	491.509	563.845	486.326	12.2522	16.8154	11.0288	8.48564	8.55154	8.8693
LOC102655594	uncharacterized LOC102655594	102655594	157.636	2.10877	0.814605	2.58871	0.00963373	0.121201	144.802	570.778	52.283	28.0195	92.7164	57.2148	0.483263	1.96121	0.157148	0.0862907	0.287603	0.161005
LOC727647	uncharacterized LOC727647	727647	2079.93	-0.438423	0.169446	-2.58739	0.00967048	0.121511	1788.73	1557.77	1952.61	2646.68	2021.43	2512.34	30.7428	27.0614	30.0638	40.6692	33.7204	43.9514
LOC413372	putative glutamate synthase [NADPH]	413372	20445.9	0.281574	0.109094	2.58103	0.00985055	0.123311	20352.7	22961.5	23991.5	18732.2	17702.4	18935	43.1957	49.9931	49.9524	36.2077	33.9634	40.1462
LOC724787	protein RUFY3	724787	1078.56	0.434491	0.16834	2.58103	0.00985062	0.123311	1228.88	1238.39	1251.59	983.018	1013.41	756.053	3.97592	3.85908	3.48775	2.56542	3.03313	2.13908
LOC100577140	UDP-glucuronosyltransferase 2B19	100577140	1520.5	0.368025	0.142542	2.58188	0.00982634	0.123311	1768.59	1870.62	1500.2	1372.96	1273.23	1337.4	9.20949	10.5423	7.31053	7.18574	7.00599	7.22483
LOC107965494	uncharacterized LOC107965494	107965494	120.888	0.778208	0.301805	2.57851	0.00992282	0.123906	147.125	140.599	170.72	82.8911	79.7793	104.213	1.34455	1.23811	1.2382	0.403982	0.391947	0.721759
LOC724539	probable serine/threonine-protein kinase irlB	724539	14562.6	-0.253985	0.098531	-2.57772	0.00994546	0.124034	14175.8	13232.2	12442.3	16345.9	15490.1	15689.1	0.27847	0.486477	0.903182	0.313192	0.2071	0.436729
LOC413736	serine/threonine-protein kinase SIK2	413736	20955.1	-0.408225	0.158483	-2.57583	0.0100001	0.12456	15039.2	18834.7	20157.8	21373.1	24047	26279	55.4546	67.5203	68.5137	67.3321	78.8329	93.4146
LOC102656697	uncharacterized LOC102656697	102656697	1772.2	0.439441	0.170808	2.57272	0.0100902	0.125371	1687.29	2094.09	2339.93	1386.97	1553.54	1571.36	6.28371	7.54981	7.74977	4.64591	5.9112	6.03135
LOC725800	fibrillin-2	725800	5993.84	0.467079	0.181617	2.57178	0.0101178	0.125559	7004.68	7388.45	6474.56	3916.9	5235.24	5943.19	5.09645	4.87584	4.512	2.6584	3.67965	4.72404
LOC408573	eukaryotic translation initiation factor 6	408573	3180.88	-0.23251	0.0905043	-2.56905	0.0101977	0.126135	2861.96	2896.72	3017.48	3400.87	3428.35	3479.88	49.5531	48.7604	47.3705	49.1887	51.6781	58.4984
LOC409306	2-oxoisovalerate dehydrogenase subunit beta, mitochondrial	409306	1094.65	2.46497	0.959495	2.56903	0.0101985	0.126135	452.989	3267.31	1840.58	92.2309	515.331	399.482	5.11406	35.1909	19.0176	0.8245	5.38076	4.72285
LOC409170	polycomb protein suz12-B	409170	1129.14	0.394486	0.153562	2.56891	0.010202	0.126135	1207.97	1316.61	1323.08	1096.26	860.322	970.608	3.53945	3.91967	3.67454	2.91606	2.56213	2.98278
LOC726883	CD109 antigen	726883	9318.66	-0.229991	0.0895761	-2.56755	0.0102421	0.126475	8713.65	8868.01	8149.75	10038	10308.8	9833.79	27.6306	26.2298	22.6127	27.0765	29.8907	30.6903
LOC107965080	uncharacterized LOC107965080	107965080	227.117	-0.676839	0.263743	-2.56628	0.0102795	0.12678	147.125	204.847	172.854	234.663	300.789	302.421	0.817099	1.4429	0.549527	1.01334	1.52336	1.27303
LOC552697	zinc transporter foi	552697	962.357	0.59927	0.233581	2.56558	0.0103004	0.126882	1015.93	1531.7	930.425	807.896	734.185	754.009	4.64395	7.22537	4.25735	3.13082	2.82948	2.93604
LOC413380	yellow-g2	413380	87.3522	-10.0174	3.90731	-2.56377	0.0103543	0.127389	0	0	0	106.241	0	417.872	0	0	0	0.71293	0.0600706	2.38834
LOC725665	5-oxoprolinase	725665	24204.4	0.537168	0.209745	2.56106	0.0104354	0.12823	22692.8	37990.7	25294.3	18665.7	19689.3	20893.6	81.1255	127.739	80.2347	57.5809	64.0422	73.68
LOC113219028	pancreatic triacylglycerol lipase-like	113219028	77.3184	-1.73137	0.676242	-2.56028	0.0104588	0.12836	56.5268	26.0714	24.541	45.5317	109.966	201.273	0.945147	0.365268	0.289315	0.586187	1.59111	3.06369
LOC411219	MTSS1-like protein	411219	1865.07	0.37445	0.146302	2.55942	0.0104846	0.12852	1911.07	2040.09	2366.61	1732.54	1648.41	1491.67	5.77767	6.29148	6.82951	4.62745	4.88268	4.31394
LOC410413	uncharacterized LOC410413	410413	1271.55	0.349623	0.136803	2.55566	0.0105986	0.1296	1348.9	1454.41	1471.39	1221.18	1017.72	1115.69	2.80704	2.89197	3.04647	2.87733	2.45154	2.90126
LOC409517	digestive cysteine proteinase 1	409517	11942.2	-0.273533	0.107025	-2.55579	0.0105947	0.1296	11608.1	10913.7	9916.7	13504.2	13090.3	12619.9	92.5683	83.6541	71.6501	94.3951	94.7742	99.0363
LOC102654919	26S proteasome non-ATPase regulatory subunit 5	102654919	5051.54	-0.317273	0.124248	-2.55354	0.0106634	0.130233	4972.04	4434.93	4086.61	5616.75	5313.95	5884.95	33.919	28.8674	25.674	33.5291	33.376	39.5561
LOC113218952	uncharacterized LOC113218952	113218952	1405.86	0.413296	0.161915	2.55256	0.0106936	0.130443	1516.93	1568.01	1732.81	1357.78	1028.51	1231.14	0.100617	0.0332343	0.146623	0.112188	0.0727194	0.0845329
LOC408517	synaptic vesicular amine transporter	408517	1833.5	0.463274	0.181681	2.54992	0.0107746	0.131273	2020.25	2467.47	1888.59	1471.02	1360.56	1793.07	4.90184	5.44602	3.85618	2.94801	3.03906	4.18491
LOC412056	organic cation transporter protein	412056	2249.41	0.824465	0.32349	2.54866	0.0108138	0.131293	1555.65	4127.66	2942.79	1478.03	1646.26	1746.07	10.6238	27.6984	18.6458	7.83697	10.4634	11.7151
LOC551349	protein BCL9 homolog	551349	2101.21	0.25408	0.0996741	2.54911	0.0107998	0.131293	2220.81	2276.59	2360.21	1957.86	1919.01	1872.76	7.10486	6.82881	6.81447	5.46366	5.74394	6.11818
LOC408949	serine/threonine-protein phosphatase 2A 56 kDa regulatory subunit gamma isoform	408949	15711.2	0.474017	0.186022	2.54818	0.0108287	0.131293	14100	21414.9	19293.5	14639	12555.5	12264.4	7.44486	9.30346	9.88638	6.88341	6.86925	8.05055
LOC100577198	uncharacterized LOC100577198	100577198	52686.1	-0.51235	0.201055	-2.54831	0.0108247	0.131293	42389.7	48029.1	39864.2	80146.3	50601.6	55085.6	159.213	169.844	132.905	265.925	177.666	206.789
LOC410537	protein lozenge	410537	8890.81	-0.73952	0.290283	-2.54759	0.0108471	0.131348	7899.04	6326.97	5755.4	13755.3	13198.1	6410.1	1.48027	0.626659	0.838324	26.272	23.4304	1.243
Gb15078	GB15078 protein	678510	116.401	1.28948	0.506237	2.54719	0.0108594	0.131348	93.6951	148.048	253.946	89.896	66.8421	45.9762	0.461713	1.00369	1.12595	0.21349	0.827208	0.214599
LOC552106	uncharacterized LOC552106	552106	9455.1	-0.250257	0.0983124	-2.54553	0.0109113	0.131817	8574.27	9186.45	8149.75	10572.7	10321.7	9925.74	327.574	339.805	296.361	345.435	350.187	368.23
Nedd9	neural precursor cell expressed, developmentally down-regulated gene 9	410767	2990.27	0.323112	0.126999	2.5442	0.0109529	0.132098	3039.28	3713.31	3219.14	2569.62	2686.62	2713.62	8.52136	10.9721	8.85182	6.43354	6.05736	6.4777
LOC727174	nucleolar protein 11	727174	1743	-0.338945	0.133357	-2.54165	0.0110332	0.132649	1684.96	1541.94	1389.23	2016.24	1980.47	1845.18	12.1739	10.4117	9.03772	12.2507	12.9278	13.0262
LOC408643	uncharacterized LOC408643	408643	58577.2	0.699817	0.275333	2.54171	0.0110311	0.132649	63990.7	90651.2	62894.4	55424.9	50662	27840.1	477.935	656.428	404.769	350.528	335.546	184.522
LOC725332	nuclear pore complex protein Nup160 homolog	725332	2960.7	0.291295	0.11467	2.54029	0.0110761	0.132847	3062.51	3439.56	3274.63	2478.56	2772.87	2736.09	2.89979	3.03292	3.18341	2.42597	2.92216	3.22337
LOC724596	transducin beta-like protein 3	724596	4554.49	0.764382	0.301174	2.53801	0.0111484	0.133554	3800.46	8802.83	4597.71	3166.21	3377.68	3582.05	13.6734	13.8609	11.4632	12.6393	12.5053	14.5977
LOC100576298	uncharacterized LOC100576298	100576298	769.034	-0.326597	0.128784	-2.53601	0.0112124	0.134161	675.999	677.857	693.55	818.404	884.04	864.352	8.85618	8.78161	8.94656	9.42616	11.5541	11.6685
Obp4	odorant binding protein 4	406101	702.13	1.34595	0.530922	2.53512	0.0112409	0.134342	1403.88	782.142	837.596	113.246	450.645	625.276	50.0752	23.5789	26.8418	3.96143	14.2897	18.5952
LOC724644	uncharacterized LOC724644	724644	8957.45	0.622073	0.245495	2.53395	0.0112784	0.134629	12248.5	11370.9	8958.54	4716.62	8180.61	8269.58	59.2813	52.1262	39.1227	19.3885	36.0008	39.2886
LOC410167	sorbitol dehydrogenase	410167	9977.41	1.67099	0.659797	2.53258	0.0113228	0.134838	5594.61	24847	15116.2	2646.68	7155.34	4504.64	80.03	337.556	190.537	30.8367	89.628	62.4371
LOC413805	H/ACA ribonucleoprotein complex subunit 4	413805	1122.61	-0.440068	0.173747	-2.53281	0.0113153	0.134838	941.597	798.903	1118.22	1328.59	1293.72	1254.64	8.10396	6.65422	8.68515	9.43551	10.038	11.0513
LOC100577422	uncharacterized LOC100577422	100577422	404.631	0.753609	0.297653	2.53183	0.0113468	0.134963	487.834	476.734	559.108	358.416	353.616	192.078	3.55136	3.68058	4.56257	1.79556	2.63799	1.58589
LOC410280	GTP-binding nuclear protein Ran	410280	17468.7	-0.304493	0.120299	-2.53114	0.0113692	0.135069	13938.1	17144.7	15814	20218.4	19050	18646.9	97.9745	113.855	99.5318	121.932	119.931	128.979
LOC552256	peroxisomal membrane protein PEX14	552256	5443.26	-0.348428	0.137734	-2.52971	0.0114155	0.13546	5349.91	4624.88	4391.77	5683.29	5877.79	6731.93	66.0892	54.3032	48.4976	62.4021	68.1996	84.1635
LOC411678	serine/threonine-protein kinase Warts	411678	1084.15	0.454216	0.179626	2.52867	0.0114496	0.135704	1015.16	1357.58	1388.17	959.669	906.68	877.634	2.4573	3.56076	3.47563	1.97194	2.08132	2.05772
LOC552324	ubiquitin carboxyl-terminal hydrolase 5	552324	6965.06	-0.297556	0.117724	-2.52757	0.0114855	0.135807	6838.2	6187.31	5721.26	7506.9	7417.31	8119.39	43.2185	37.6067	32.1754	41.0753	42.8374	50.807
LOC725801	G/T mismatch-specific thymine DNA glycosylase	725801	370.029	0.49096	0.194239	2.52761	0.0114842	0.135807	466.927	447.87	381.986	291.87	334.21	297.313	5.65395	5.74636	4.44944	2.9807	3.89963	3.72171
LOC100578286	flavin-containing monooxygenase FMO GS-OX-like 2	100578286	8966.33	0.448547	0.177494	2.52711	0.0115006	0.135826	8000.48	12208.9	10838.6	7733.39	7436.72	7579.94	5.54488	15.417	7.2812	3.25795	3.34431	3.68431
LOC113218635	nuclear transcription factor Y subunit gamma-like	113218635	152.036	2.03256	0.805254	2.52412	0.0115988	0.136344	87.5004	437.627	208.065	11.6748	113.2	54.1497	0.231974	1.38783	0.591942	0.0393635	0.318866	0.131827
LOC410922	wiskott-Aldrich syndrome protein family member 3	410922	3932.1	0.452847	0.179404	2.52417	0.0115971	0.136344	3687.41	5525.28	4420.58	3110.17	3471.48	3377.72	10.386	14.3601	10.7857	7.33638	8.79157	8.97071
LOC409924	synaptic vesicle glycoprotein 2B	409924	74474.4	0.589313	0.233446	2.52441	0.0115893	0.136344	74126	123021	71284.2	67318.1	55705.3	55392.1	468.477	743.76	404.709	361.15	317.989	342.778
LOC413025	peroxidasin	413025	19452.1	0.39876	0.157966	2.52433	0.0115918	0.136344	18893.1	24449.4	23028	17618.4	18257.6	14466.1	59.6741	73.7846	65.6032	48.139	52.8713	45.0808
LOC726670	RING finger protein 207	726670	1140.14	0.657648	0.260769	2.52196	0.0116703	0.136704	1297.02	1899.49	990.177	824.241	879.728	950.174	4.89902	6.9117	3.60436	2.56994	2.99591	3.45642
LOC408688	Down syndrome cell adhesion molecule-like protein Dscam2	408688	6987.38	0.561668	0.222643	2.52272	0.011645	0.136704	7259.44	8155.7	9577.4	4453.94	7398.99	5078.83	14.7556	15.3258	17.6144	7.74672	13.4424	10.0626
LOC725589	centrosomal protein of 120 kDa	725589	202.043	-0.695219	0.275629	-2.5223	0.0116591	0.136704	171.903	144.324	146.179	305.88	205.917	238.054	0.936772	0.725281	0.741404	1.58525	1.11184	1.22265
Arp1	actin related protein 1	406122	62820.1	-0.409448	0.162722	-2.51624	0.0118614	0.13878	63699.5	51042.2	47151.8	80515.3	64616.9	69895	666.685	513.824	447.26	729.297	618.711	727.292
LOC726692	histone H3.3	726692	11294.3	-0.22282	0.0886307	-2.51403	0.0119359	0.139189	10533.3	10871.8	9865.49	12106.8	12272	12116.3	155.632	152.534	131.922	152.166	162.648	176.802
LOC408511	protein preli-like	408511	11204.1	-0.582207	0.231724	-2.5125	0.0119879	0.139189	10656.5	10369	5894.11	13094.5	13766.2	13444.5	21.9348	17.0475	18.5139	20.7803	21.1616	24.8313
LOC725239	RNA-binding protein 33	725239	944.4	0.416173	0.165585	2.51335	0.0119592	0.139189	1190.16	999.094	1048.86	907.132	797.793	723.358	4.62399	3.51058	3.87485	3.29347	2.95571	2.98822
LOC100576866	probable elongator complex protein 3	100576866	2017.82	-0.250817	0.0997762	-2.5138	0.0119438	0.139189	1842.15	1873.42	1812.83	2163.34	2273.71	2141.47	17.5604	16.2126	14.8405	17.9048	18.9062	19.3791
LOC113218727	uncharacterized LOC113218727	113218727	1468.77	-3.26787	1.29958	-2.51456	0.0119181	0.139189	522.679	294.235	11.737	4209.93	3005.74	768.313	64.1657	52.4954	53.6101	63.2679	64.1887	63.9842
LOC412445	flavin reductase (NADPH)	412445	7033.57	-0.318696	0.126914	-2.51113	0.0120346	0.139189	6474.26	6831.64	5472.65	7589.79	8102.98	7730.13	125.022	125.438	95.336	125.266	143.526	144.932
LOC409219	phospholipase A-2-activating protein	409219	5639.27	-0.290378	0.11562	-2.51149	0.0120224	0.139189	4993.72	5390.27	4836.71	6465.5	5652.47	6496.94	22.7194	23.1403	20.0466	25.5276	23.6816	28.9532
LOC107964902	uncharacterized LOC107964902	107964902	1056.45	-0.783725	0.312022	-2.51176	0.0120131	0.139189	742.592	799.834	786.38	1940.35	1261.37	808.159	0.209256	0.242748	0.336827	0.068152	0	0.685047
LOC411879	WD repeat-containing protein 82	411879	6207.72	0.230485	0.0917863	2.51111	0.0120352	0.139189	6514.52	6636.11	6957.91	5533.86	5946.79	5657.11	16.5068	15.8302	16.076	11.362	12.8839	13.7454
LOC552056	eukaryotic translation initiation factor 3 subunit L	552056	4600.04	-0.291563	0.11603	-2.51283	0.0119766	0.139189	4320.04	4313.89	3775.05	5387.92	4866.53	4936.82	41.3759	39.9362	33.0072	44.7355	42.2744	46.886
LOC413264	yellow-b	413264	10059.6	2.126	0.846803	2.51062	0.0120521	0.139224	6863.75	34584.7	7658.93	2420.19	4791.07	4038.75	47.435	314.777	53.3934	6.97654	24.4014	17.9603
LOC726592	proteoglycan 4	726592	2279.85	2.20827	0.879726	2.51018	0.012067	0.139236	1155.32	4840.9	5249.64	254.511	575.704	1603.04	13.2476	51.6704	53.7212	2.33596	5.64656	18.3021
LOC411706	phospholipase B1, membrane-associated	411706	2190.78	0.905972	0.36111	2.50885	0.0121124	0.139599	1841.38	4417.24	2312.19	1326.26	2102.29	1145.32	13.2545	34.23	14.9733	8.75916	14.5423	8.46235
LOC408780	signal-induced proliferation-associated 1-like protein 2	408780	1356.98	0.448279	0.178747	2.5079	0.0121451	0.139654	1367.48	1858.52	1472.46	1147.63	1250.59	1045.19	3.31529	4.39844	3.22267	2.41089	2.80262	2.61893
LOC410101	trafficking kinesin-binding protein milt	410101	20079	0.580377	0.231384	2.50829	0.0121318	0.139654	17367.7	32672.1	22153.1	15818.2	15498.7	16964.2	47.7618	99.2207	62.4257	36.1901	32.046	40.1062
LOC100576382	uncharacterized LOC100576382	100576382	273.8	0.64104	0.255682	2.50718	0.0121698	0.139778	329.869	395.727	275.286	210.146	187.589	244.185	1.89089	1.62969	0.90474	0.774241	1.02276	1.27352
LOC102656885	uncharacterized LOC102656885	102656885	489.641	-0.538117	0.214733	-2.50598	0.0122113	0.139798	380.201	432.041	386.254	468.16	589.72	681.469	0.319976	0.479408	0.434664	0.674078	0.237142	0.711712
LOC552470	prostaglandin E synthase 3	552470	19620	-0.20812	0.0830511	-2.50592	0.0122133	0.139798	18306.2	17766.7	18548.7	21877.4	20737.2	20483.9	222.749	205.385	187.737	219.262	222.064	236.604
LOC411114	synaptosomal-associated protein 25	411114	24175.4	0.366896	0.146368	2.50667	0.0121875	0.139798	22946.8	31187.9	27564.9	21430.3	21939.3	19983.3	55.2639	71.0471	58.8983	43.989	47.7805	46.71
LOC413834	atypical protein kinase C	413834	4859.09	0.460428	0.183925	2.50335	0.0123024	0.140497	4774.58	6186.37	5922.92	4920.93	3528.61	3821.13	18.1849	24.0394	22.1741	16.9133	12.942	14.9292
LOC551766	ATP synthase subunit beta, mitochondrial	551766	84992.8	-0.342441	0.136914	-2.50113	0.0123796	0.141218	74207.3	78080.2	72571	98242.3	80659	106197	648.818	669.811	578.206	750.255	643.425	921.644
LOC727288	RNA-binding protein NOB1	727288	2455.65	-0.30521	0.122169	-2.49827	0.0124803	0.142204	2309.08	2034.5	2247.1	2505.41	2833.24	2804.55	26.8265	22.1257	23.4449	25.0941	29.9026	31.7831
LOC107964196	uncharacterized LOC107964196	107964196	253.829	1.11092	0.445155	2.49559	0.0125749	0.14312	260.953	244.885	535.634	122.585	122.903	236.011	0.897346	0.747718	1.64993	0.371144	0.420926	0.783057
LOC413350	lachesin	413350	257.458	0.592856	0.237605	2.49513	0.0125911	0.143142	292.7	309.133	327.569	166.95	212.385	236.011	1.62796	1.67046	1.56585	0.687265	1.04193	1.36688
LOC102653588	cleavage and polyadenylation specificity factor 73	102653588	956.837	-0.37522	0.150435	-2.49423	0.0126232	0.143344	914.495	793.316	790.648	1069.41	1171.89	1001.26	5.75274	4.70506	4.46202	5.58703	6.60672	6.3213
LOC410671	proto-oncogene tyrosine-protein kinase ROS	410671	1151.67	0.53323	0.214312	2.4881	0.0128428	0.145355	1067.81	1481.42	1537.55	962.004	1068.4	792.833	1.72895	2.35552	2.37051	1.41135	1.53268	1.35289
LOC552636	dipeptidase 1	552636	1598.47	1.031	0.414611	2.48666	0.0128949	0.145355	967.151	3547.57	1924.87	1099.77	1227.95	823.484	8.83303	32.1503	16.48	8.81464	10.737	7.28054
LOC413686	H/ACA ribonucleoprotein complex subunit 1	413686	1925	-0.466957	0.187813	-2.48629	0.0129082	0.145355	1467.37	1368.75	2013.43	2299.94	2110.92	2289.61	30.2631	26.8929	38.3555	41.5037	40.1335	46.2514
LOC100578053	uncharacterized LOC100578053	100578053	2684.37	-0.601984	0.242016	-2.48737	0.012869	0.145355	1995.47	2552.21	1849.11	3684.57	2264.01	3760.85	1.56185	1.35086	1.61015	2.97124	2.98463	2.99335
LOC100576503	uncharacterized LOC100576503	100576503	9068.41	0.33124	0.133231	2.48621	0.0129112	0.145355	8680.35	10609.2	11026.4	7857.14	8389.76	7847.62	9.60374	8.9198	6.42698	7.25006	15.6697	12.5188
LOC409465	uncharacterized LOC409465	409465	3941.31	-0.381648	0.153515	-2.48607	0.0129163	0.145355	3534.86	3858.57	2874.5	4702.61	4532.32	4145.01	15.3613	15.5732	11.2564	17.6899	17.8034	16.1003
LOC102653678	uncharacterized LOC102653678	102653678	1049.37	0.88261	0.354688	2.48841	0.0128315	0.145355	895.137	1158.32	2029.44	502.016	799.949	911.35	1.64347	1.93836	2.88521	0.73118	1.20479	1.51176
LOC411983	putative fatty acyl-CoA reductase	411983	136315	-0.312706	0.125698	-2.48776	0.0128552	0.145355	127335	112358	125104	159567	133076	160449	1045.98	872.474	931.71	1123.92	990.887	1284.99
LOC409066	pyridoxine-5'-phosphate oxidase	409066	9530.6	0.895183	0.360366	2.4841	0.012988	0.145672	7020.94	20954	9213.55	6087.24	7198.46	6709.46	108.542	314.592	131.291	81.353	102.371	103.871
LOC411596	pachytene checkpoint protein 2 homolog	411596	4619.76	0.266482	0.107271	2.4842	0.0129842	0.145672	4957.32	5347.43	4830.31	4449.27	3973.87	4160.33	4.28127	5.25493	3.21752	4.2727	3.97616	3.69627
LOC725659	39S ribosomal protein L35, mitochondrial	725659	2448.59	-0.285701	0.115071	-2.48282	0.0130346	0.146031	2311.4	2106.2	2202.29	2884.84	2649.96	2536.86	65.9322	55.7428	58.2642	71.2817	71.1739	74.9524
LOC726352	transmembrane protease serine 11B-like protein	726352	231.685	-1.55827	0.628408	-2.47971	0.0131488	0.147147	154.094	89.3877	108.834	81.7236	366.553	589.517	1.2743	0.697259	0.6522	0.572943	2.8404	4.87843
LOC412515	phospholipase B1, membrane-associated	412515	4570.04	-0.561544	0.226551	-2.47866	0.0131876	0.147289	4124.91	3960.99	2988.67	4234.45	6953.73	5157.5	39.1329	36.0766	26.1176	33.9072	61.032	49.086
Hsc70-4	heat shock protein cognate 4	409418	346759	-0.379938	0.153298	-2.47843	0.0131961	0.147289	346850	307310	249921	419606	386294	370572	2220.81	1877.32	1436.48	2299.48	2221.08	2318.17
LOC113219158	uncharacterized LOC113219158	113219158	11670.4	-0.22017	0.0888435	-2.47817	0.0132056	0.147289	11191.5	10329.9	10822.6	12952	12545.8	12180.6	3.31567	2.61601	2.52521	2.89461	2.07114	2.76204
LOC409221	uncharacterized LOC409221	409221	952.44	0.324635	0.131054	2.4771	0.0132453	0.147319	1043.81	1000.03	1134.22	825.408	836.604	874.569	3.08757	3.04413	3.17959	2.02696	2.08444	2.5163
LOC726337	mitochondrial intermembrane space import and assembly protein 40-B	726337	24455.9	0.289056	0.116687	2.4772	0.0132418	0.147319	24541.9	29702.8	26448.8	22624.6	20881.7	22535.5	38.4614	29.7506	31.5941	30.0253	33.1248	37.5423
LOC113218555	uncharacterized LOC113218555	113218555	85.8549	1.98162	0.800244	2.47627	0.0132763	0.147422	49.5578	270.957	90.6951	10.5073	47.4363	45.9762	0.120115	0.541756	0.260639	0	0.0911315	0.109907
LOC411280	GTP-binding protein 128up	411280	1775.84	-0.412776	0.166799	-2.4747	0.013335	0.147909	1712.07	1370.61	1487.4	2011.57	1775.63	2297.79	18.6029	14.6339	14.9111	19.2433	17.7615	24.374
LOC113218576	lysozyme-like	113218576	1658.97	1.80113	0.727994	2.4741	0.0133573	0.147993	703.875	3325.04	3705.69	468.16	1032.82	718.25	17.375	78.8993	85.3176	10.1857	22.9772	17.1793
LOC100576929	uncharacterized LOC100576929	100576929	1329.55	0.340404	0.137712	2.47185	0.0134415	0.148598	1551	1487	1418.04	1293.57	1160.03	1067.67	34.1794	30.2039	31.3045	20.8601	19.606	18.9057
LOC724718	xanthine dehydrogenase	724718	11760.3	0.425909	0.172287	2.47209	0.0134326	0.148598	10667.3	15409.1	14375.7	9150.71	10441.4	10517.3	38.7005	51.6685	46.2446	29.0852	35.1953	38.1045
LOC725923	serine/threonine-protein kinase N	725923	9704.74	0.406669	0.164633	2.47015	0.0135056	0.148978	9454.69	13242.4	10494	8524.94	7613.53	8898.94	20.1725	24.1648	20.4404	15.7075	13.989	17.8703
LOC100578317	uncharacterized LOC100578317	100578317	2663.63	0.660412	0.267355	2.47017	0.0135048	0.148978	3392.38	3532.68	2863.83	1674.17	1557.85	2960.87	6.90748	6.77228	5.27754	3.10002	2.89804	6.15506
LOC408779	short stop	408779	82246.5	0.263505	0.106705	2.46947	0.0135312	0.149096	88850.9	97725	82633.9	73215	77504.5	73549.6	39.0667	43.6576	32.8766	24.5912	27.0504	28.0907
LOC552348	methyltransferase-like protein 23	552348	7745.78	-0.211895	0.0858307	-2.46876	0.0135583	0.149231	7185.87	7274.86	7073.15	8315.96	8003.8	8621.04	48.6159	49.715	40.428	50.9533	45.8135	55.2967
LOC102655361	uncharacterized LOC102655361	102655361	840.539	-1.41004	0.571367	-2.46783	0.0135934	0.149453	373.232	412.487	593.252	2287.09	1072.71	304.464	2.97314	3.44998	4.14645	16.498	7.92897	2.33154
LOC411586	GAS2-like protein pickled eggs	411586	15081.5	0.481548	0.195284	2.46589	0.0136673	0.150101	13734.5	20995.9	17996	14615.7	11592.8	11554.3	30.9343	45.6257	36.5942	28.2507	23.6879	25.6632
LOC725696	RNA polymerase-associated protein Rtf1	725696	1139.1	0.371602	0.150943	2.46186	0.0138219	0.151136	1109.63	1354.78	1391.37	1013.37	990.772	974.695	7.37457	8.64033	8.54794	5.75314	6.03487	6.46076
Cry2	cryptochrome 2	410197	3023.82	-0.934022	0.379378	-2.46198	0.0138171	0.151136	1329.54	1405.99	3498.7	5059.86	3718.36	3130.47	7.63466	7.54909	17.5916	25.8403	20.7956	17.9363
LOC102656653	uncharacterized LOC102656653	102656653	67.275	-1.39852	0.568476	-2.46013	0.0138888	0.151391	30.1993	61.4541	19.206	124.92	84.0916	83.7788	0.174893	0.404854	0.099276	0.632501	0.319479	0.432074
LOC552049	protein DDI1 homolog 2	552049	6369.07	-0.288878	0.117397	-2.4607	0.0138667	0.151391	6204.01	5798.1	5197.36	6788.9	6835.14	7390.92	38.4664	34.8186	29.0762	36.6249	38.6377	45.3149
LOC727455	UBA-like domain-containing protein 2	727455	10187	0.218031	0.0886275	2.46008	0.0138904	0.151391	10562	11373.7	10930.4	9715.77	9426.89	9113.5	58.5803	66.017	57.8247	46.3541	40.4319	49.3005
LOC727456	glucose-6-phosphate 1-epimerase	727456	1187.5	0.683147	0.277758	2.4595	0.013913	0.151471	1108.08	2023.33	1259.06	1092.76	760.059	881.721	15.6654	27.3391	15.9816	13.3712	9.81811	12.6517
LOC551008	cell cycle checkpoint protein RAD1	551008	313.815	-0.520456	0.21173	-2.45811	0.013967	0.151894	295.023	226.263	251.812	345.574	370.866	393.352	3.77643	2.58281	2.92773	3.40554	4.27839	4.18367
LOC725829	uncharacterized LOC725829	725829	7486.41	0.482671	0.196568	2.45549	0.0140694	0.152843	7161.87	7725.52	11295.3	6047.55	6461.04	6227.22	23.8252	25.0162	35.4084	18.2438	20.5591	21.5722
LOC552680	X-ray repair cross-complementing protein 6	552680	1159.18	-0.353093	0.14384	-2.45476	0.0140981	0.152988	1119.7	1031.68	901.616	1295.9	1266.77	1339.44	9.54951	9.38244	7.09328	10.335	10.3776	12.2414
LOC408626	poly(A)-specific ribonuclease PARN	408626	3122.14	-0.239493	0.0976084	-2.45361	0.0141429	0.153309	2783.75	2978.66	2828.62	3419.55	3252.62	3469.67	19.6309	19.6313	18.0983	20.4338	20.3456	24.2766
LOC410654	cholecystokinin receptor-like	410654	246.5	1.59084	0.648712	2.4523	0.0141945	0.153649	147.899	796.109	166.452	89.896	150.934	127.712	0.527724	2.61748	0.493939	0.320404	0.415219	0.505863
LOC725209	sensory neuron membrane protein 2	725209	952.325	1.01778	0.415073	2.45204	0.0142049	0.153649	772.791	1535.42	1517.28	300.042	775.152	813.267	5.21318	11.4507	11.4636	2.09317	5.6793	4.30811
LOC413423	hemicentin-2	413423	4419.78	0.491892	0.200649	2.45151	0.0142258	0.15371	5102.9	6361.43	4033.26	3995.12	3218.12	3807.85	13.4143	15.7596	9.56542	9.22306	7.89955	9.89243
LOC551080	cystinosin homolog	551080	3449.33	-0.319498	0.130371	-2.45068	0.0142586	0.153898	3097.36	3376.25	2732.59	3815.32	3641.82	4032.62	15.0668	15.0444	12.5928	17.6825	16.1328	21.4912
LOC551045	CCR4-NOT transcription complex subunit 7	551045	3335.11	-0.251945	0.102824	-2.45026	0.0142755	0.153914	3045.48	2877.17	3211.67	3721.93	3505.97	3648.46	28.9261	28.0341	28.8395	32.3725	30.7861	35.9194
LOC408685	MAP7 domain-containing protein 1	408685	51589.3	0.268237	0.109537	2.44882	0.0143326	0.154364	51145.9	56393.4	61576.6	45947.3	46721.5	47750.8	118.584	130.586	131.944	90.8634	94.9206	105.811
LOC408275	uncharacterized LOC408275	408275	33887.2	0.238896	0.0975829	2.44813	0.0143599	0.154492	35318.4	36625.7	38116.5	29303.8	33096.5	30862.3	160.045	160.374	156.24	114.063	137.666	138.054
LOC408769	excitatory amino acid transporter	408769	32.332	-1.32186	0.540126	-2.44732	0.0143925	0.154677	15.4868	17.6913	22.407	46.6992	53.9049	37.8026	0.0578844	0.0647147	0.0822525	0.146261	0.152638	0.108079
LOC408509	glutamate decarboxylase 1	408509	18322.2	-0.358079	0.146572	-2.44303	0.0145645	0.155858	16656.1	16858	14664.9	22124.9	22298.3	17331	50.1867	47.3673	30.4669	36.5909	36.4924	45.8617
LOC102655899	uncharacterized LOC102655899	102655899	49.2303	1.39417	0.570901	2.44205	0.014604	0.155948	54.2038	105.217	54.417	38.5268	21.562	21.4555	0.288601	0.548686	0.316342	0.10731	0.0260566	0.107826
LOC107966086	uncharacterized LOC107966086	107966086	352.193	0.860876	0.352869	2.43964	0.0147017	0.156824	264.824	568.916	529.232	283.698	265.212	201.273	1.02631	1.86762	2.59233	1.10699	1.63019	0.613751
LOC102654175	uncharacterized LOC102654175	102654175	40.1713	2.2625	0.92777	2.43865	0.0147423	0.15709	22.4559	154.566	22.407	16.3447	14.0153	11.2386	0.252763	1.50611	0.138999	0.141048	0.0912189	0.0472504
LOC410785	plexin-A4	410785	1973.48	0.448485	0.184003	2.43738	0.0147943	0.157476	1997.8	2163.93	2672.84	1409.15	1754.07	1843.13	3.8555	3.79786	4.36181	2.709	3.28588	3.591
LOC725211	uncharacterized LOC725211	725211	7694.57	0.438945	0.180265	2.435	0.0148916	0.158344	7952.47	10157.6	8459.18	5239.65	7257.76	7100.76	23.5529	28.8327	23.1541	14.3376	19.723	20.9761
LOC551459	protein YIF1B	551459	4008.97	-0.209708	0.0861527	-2.43414	0.0149272	0.15841	3746.26	3776.63	3631	4272.98	4369.53	4257.39	55.2574	54.243	49.525	54.2093	59.1621	61.4191
LOC408395	venom carboxylesterase-6-like	408395	2541.33	-1.72034	0.707476	-2.43166	0.0150297	0.158557	1122.02	1766.34	661.54	5363.4	5081.08	1253.62	6.73032	9.81626	4.0133	29.7067	28.8741	7.56628
LOC408470	NAD kinase	408470	92338.3	-0.598598	0.24601	-2.43322	0.0149651	0.158557	89124.2	79763.6	51467.8	85143.2	129827	118704	462.504	392.898	238.513	383.222	621.171	612.701
LOC100577576	protein obstructor-E	100577576	720.402	0.685015	0.281667	2.432	0.0150156	0.158557	700.003	1081.96	883.477	384.101	660.874	611.994	11.3513	17.383	11.3418	5.22714	7.92452	9.60759
LOC552079	homeobox protein homothorax	552079	221.369	1.30048	0.534855	2.43146	0.0150382	0.158557	101.439	472.079	371.316	137.763	125.059	120.56	0.688367	1.98721	1.41555	0.429015	0.507639	0.673845
LOC411215	DTW domain-containing protein 2	411215	315.288	-0.636027	0.261498	-2.43224	0.0150057	0.158557	256.307	229.056	255.013	477.499	381.647	292.204	4.35415	3.84826	4.13798	6.34754	6.60805	4.68345
LOC102655682	uncharacterized LOC102655682	102655682	47.3132	1.58587	0.651854	2.43285	0.0149803	0.158557	59.6242	81.0076	72.556	9.33984	20.4839	40.8677	0.825327	0.921955	0.745667	0.0504135	0.179341	0.638033
LOC113219349	uncharacterized LOC113219349	113219349	72.1313	9.49418	3.90733	2.42984	0.0151056	0.159101	240.045	192.742	0	0	0	0	6.53307	4.16614	0	0	0	0
LOC102654947	uncharacterized LOC102654947	102654947	1006.49	0.346349	0.142628	2.42833	0.0151685	0.159595	1100.34	1147.14	1133.15	799.724	978.913	879.677	5.38822	5.12637	4.93591	3.27541	4.11523	3.95325
LOC102655946	uncharacterized LOC102655946	102655946	47.0941	-1.23976	0.510853	-2.42684	0.015231	0.159811	20.1328	27.9337	36.278	63.0439	84.0916	51.0846	0.119461	0.161278	0.254574	0.440479	0.578849	0.364489
LOC551263	monocarboxylate transporter 13	551263	1210.91	0.675432	0.278333	2.4267	0.0152368	0.159811	1218.04	1310.09	1939.81	1234.03	825.823	737.662	8.8084	9.5495	13.92	8.49899	5.79371	5.04991
LOC552693	uncharacterized LOC552693	552693	217.908	-0.615434	0.253678	-2.42604	0.0152646	0.159935	182.744	180.638	152.581	298.875	217.776	274.835	1.41896	1.38567	0.85087	1.70245	1.45717	1.82664
LOC726793	uncharacterized LOC726793	726793	640.576	-0.335607	0.138432	-2.42436	0.0153356	0.16001	551.33	579.158	568.711	746.02	713.701	684.534	7.13757	7.15802	6.60722	8.59997	8.6461	9.2879
LOC100578734	uncharacterized protein C1orf131 homolog	100578734	616.155	-0.586903	0.242029	-2.42493	0.0153113	0.16001	434.405	464.63	579.381	657.291	626.375	934.849	45.7093	38.8313	36.3091	39.9007	38.4952	39.4986
LOC100576291	uncharacterized LOC100576291	100576291	165.051	0.919254	0.37914	2.42457	0.0153264	0.16001	233.851	265.37	148.313	134.26	79.7793	128.733	0.445403	0.61939	0.337145	0.17198	0.11441	0.236512
LOC411457	galactosylgalactosylxylosylprotein 3-beta-glucuronosyltransferase P	411457	4831.39	0.663319	0.273527	2.42506	0.0153058	0.16001	3877.12	8454.59	5437.44	3418.38	3947.99	3852.8	17.6291	40.0378	24.554	13.6013	17.1962	18.0902
LOC113219148	uncharacterized LOC113219148	113219148	8308.04	1.45986	0.602258	2.42398	0.0153516	0.16001	4178.34	13352.3	19027.8	4474.95	5071.37	3743.48	0	0	2.52283	0.67389	0.17435	0
LOC410449	uncharacterized LOC410449	410449	10064.4	-0.37954	0.156672	-2.42251	0.0154136	0.160324	8693.51	8359.61	9191.14	13414.3	9545.48	11182.4	74.4251	67.4381	73.5309	101.232	72.2205	94.6313
Dll	distal-less	726710	220.338	-0.856569	0.353575	-2.42259	0.0154102	0.160324	149.448	177.844	142.978	263.851	398.896	189.013	0.476686	0.595166	0.268314	0.477463	0.785231	0.366803
LOC107964183	uncharacterized LOC107964183	107964183	47.6746	1.70794	0.705397	2.42124	0.0154675	0.160671	56.5268	47.4872	115.236	8.17236	26.9525	31.6725	0.239697	0.116724	0.450937	0.0328273	0.111664	0.115438
LOC412676	protein mahjong	412676	1793.13	0.266625	0.110131	2.42097	0.015479	0.160671	1877	1955.36	2043.31	1668.33	1553.54	1661.27	4.8048	4.70257	4.77097	3.64135	3.71076	4.15842
LOC102656011	uncharacterized LOC102656011	102656011	210.497	0.891147	0.368276	2.41978	0.01553	0.161033	266.373	297.959	256.08	142.433	210.229	89.9089	1.40348	1.76812	1.31855	0.621207	1.04832	0.550198
LOC552694	tyrosine-protein phosphatase non-receptor type 5	552694	2119.56	0.723383	0.299256	2.41727	0.0156374	0.161645	1503.77	3347.38	3069.76	1523.56	1453.28	1819.63	8.01679	18.0691	15.9932	7.33117	6.50232	9.14665
LOC552052	zinc finger protein 330 homolog	552052	2508.54	-0.300832	0.124443	-2.41743	0.0156307	0.161645	2177.44	2229.11	2337.8	2654.85	3067.19	2584.88	27.9728	27.0306	26.7511	29.5477	36.3631	32.7779
LOC552467	RNA-binding protein spenito	552467	4610.89	0.294098	0.121663	2.41732	0.0156351	0.161645	4817.94	4794.35	5626.29	4288.15	3901.64	4236.96	11.6053	13.3089	14.1448	8.22151	7.46392	9.18966
LOC100578670	uncharacterized LOC100578670	100578670	2630.75	0.348208	0.144093	2.41655	0.0156683	0.161798	2576.23	3347.38	2917.18	2217.04	2408.47	2318.22	0.175579	0.119422	0.05271	0.0156551	0.0391811	0.157563
LOC408723	cerebellar degeneration-related protein 2-like	408723	45062.8	-0.258025	0.10693	-2.41303	0.0158207	0.162869	43716.1	39722.6	39691.4	52299.6	45464.5	49482.6	206.051	178.25	168.48	218.804	194.214	228.957
LOC409475	26S proteasome non-ATPase regulatory subunit 2	409475	13285.4	-0.319682	0.132469	-2.41326	0.0158107	0.162869	13293.9	11734	10428.9	15332.5	13826.6	15096.5	72.9744	61.4772	52.8701	72.7449	69.679	81.4663
LOC412315	ran-specific GTPase-activating protein	412315	1812.69	-0.379365	0.157476	-2.40904	0.0159947	0.164243	1453.44	1537.28	1737.08	2273.08	1776.71	2098.56	22.0603	22.2204	23.5645	30.7718	23.7638	32.5536
LOC725630	tubulin-specific chaperone A	725630	6105.72	-0.225754	0.0937337	-2.40846	0.01602	0.164246	5521.82	5812.06	5552.67	6874.12	6606.58	6267.06	85.8738	84.4316	73.557	94.6442	94.3722	91.6645
LOC408386	eukaryotic translation initiation factor 3 subunit G	408386	5817.05	-0.243484	0.101181	-2.40642	0.0161099	0.164831	5417.28	5515.97	5047.98	6497.03	5941.4	6482.64	86.7185	83.9025	73.4502	89.7358	86.6412	101.655
LOC410184	F-box-like/WD repeat-containing protein TBL1XR1	410184	3084.28	-0.279685	0.116216	-2.4066	0.0161016	0.164831	2559.97	3026.15	2773.13	3482.59	3365.82	3298.02	20.5308	24.1703	20.4821	24.4552	25.5056	26.7873
LOC727390	uncharacterized LOC727390	727390	1372.54	0.312921	0.130088	2.40546	0.016152	0.165093	1408.52	1603.39	1551.42	1138.29	1265.69	1267.92	21.1449	22.0297	20.7385	14.88	17.024	17.7972
LOC409825	T-complex protein 1 subunit epsilon	409825	16284.3	-0.293225	0.122092	-2.40166	0.0163207	0.165972	16032.7	14733.1	13138	18405.3	16758	18638.7	138.576	121.206	101.207	134.2	129.362	156.433
LOC102656333	uncharacterized LOC102656333	102656333	242.288	1.02273	0.425635	2.40282	0.0162691	0.165972	392.59	326.824	255.013	86.3935	147.699	245.206	0.758874	0.577737	0.561764	0.2339	0.252434	0.757298
LOC410905	sodium/potassium-transporting ATPase subunit beta-2	410905	4222.66	-0.580437	0.241642	-2.40205	0.0163034	0.165972	4085.42	3788.74	2278.05	5839.74	4620.73	4723.28	35.0597	31.1143	17.3055	44.2342	36.2243	40.4234
LOC102654507	uncharacterized LOC102654507	102654507	54.1732	-1.16121	0.483468	-2.40184	0.0163129	0.165972	29.4249	23.2781	48.015	77.0537	80.8574	66.41	0.178791	0.11861	0.280628	0.324021	0.439548	0.324632
LOC100576370	DNA ligase 1	100576370	203.273	1.05004	0.437191	2.4018	0.0163148	0.165972	137.833	308.201	376.651	134.26	158.48	104.213	0.305524	0.689195	0.921712	0.222953	0.301594	0.24347
LOC113218900	uncharacterized LOC113218900	113218900	161.499	1.6069	0.669453	2.40031	0.016381	0.166415	285.731	352.895	90.6951	80.5561	131.528	27.5857	0.785453	1.06815	0.168949	0.20905	0.326865	0.121544
LOC102655737	neural-cadherin	102655737	128.18	0.856788	0.35723	2.39842	0.0164658	0.167108	172.678	141.531	181.39	93.3984	63.6078	116.473	0.441847	0.44379	0.481116	0.19717	0.171669	0.275866
LOC412309	ras-related C3 botulinum toxin substrate 1	412309	710.718	0.368528	0.153876	2.39496	0.016622	0.16717	769.694	790.523	842.931	671.301	558.455	631.406	9.91209	9.81365	9.31132	7.21995	7.09887	7.25612
LOC100577909	high mobility group protein I	100577909	1745.08	-0.402166	0.16786	-2.39584	0.0165824	0.16717	1754.65	1409.72	1344.42	2205.37	1924.4	1831.89	22.2748	17.1188	15.0767	24.0608	21.9509	22.1723
LOC551071	bromodomain adjacent to zinc finger domain protein 2B	551071	6628.48	0.238383	0.0994658	2.39663	0.0165465	0.16717	6897.05	6947.1	7681.34	6221.5	5889.65	6134.24	5.45719	5.8541	6.28748	4.31483	4.2499	4.56138
LOC552685	pupal cuticle protein	552685	26.5947	5.07211	2.11672	2.39621	0.0165657	0.16717	0	130.357	24.541	4.66992	0	0	0	1.37251	0.303727	0.0385719	0	0
LOC413030	transmembrane protein 189	413030	1465.86	0.423226	0.17668	2.39543	0.0166008	0.16717	1442.6	1689.06	1906.73	1388.13	1276.47	1092.19	4.19037	6.4624	6.12121	3.77836	2.8179	2.44871
LOC100576839	uncharacterized LOC100576839	100576839	199.959	0.733508	0.30594	2.39756	0.0165048	0.16717	294.249	248.61	205.931	145.935	186.511	118.516	1.09742	0.929794	0.693275	0.466486	0.59083	0.454475
LOC409915	RNA-binding protein 26	409915	3238.4	0.269718	0.112571	2.39598	0.0165761	0.16717	3337.4	3429.32	3855.07	2959.56	2848.33	3000.71	14.2011	14.7954	15.4712	11.3882	11.1942	12.5658
LOC102654355	uncharacterized LOC102654355	102654355	440.853	0.565939	0.236485	2.39313	0.0167055	0.167842	600.113	528.877	449.207	337.402	430.161	299.356	8.23571	6.8347	5.3874	4.21674	5.10306	3.83493
LOC102656557	uncharacterized LOC102656557	102656557	1387.85	0.526893	0.220441	2.39018	0.0168403	0.168638	1522.35	1754.23	1638.91	1319.25	818.276	1274.05	10.2934	11.7728	9.88911	7.35742	5.11603	8.49083
LOC724178	uncharacterized LOC724178	724178	6604.51	0.584068	0.244385	2.38995	0.0168505	0.168638	6500.58	8794.45	8476.25	3622.69	5611.5	6621.59	8.35928	11.6757	11.0922	3.65697	5.99505	8.31776
LOC411854	heat shock factor protein	411854	8122.07	0.365496	0.152886	2.39065	0.0168187	0.168638	7672.93	9026.3	10738.3	7164.83	7089.57	7040.48	33.522	41.3201	48.2513	28.8253	29.4643	30.1563
LOC724912	anoctamin-1-like	724912	13641.5	-0.21543	0.0901548	-2.38955	0.0168689	0.168638	13057.7	12526.4	12289.7	15065.2	13910.7	14999.5	37.4745	35.0683	32.4149	37.1191	35.0128	40.2192
LOC413557	syndecan	413557	4219.02	0.229877	0.096299	2.38712	0.0169811	0.169591	4547.7	4330.65	4785.5	3835.17	3967.4	3847.69	9.2837	9.52301	10.0023	6.8402	7.26486	7.97586
LOC410339	transcription termination factor 3, mitochondrial	410339	4759.03	-0.249816	0.104687	-2.38631	0.0170186	0.169796	4498.14	4353.93	4191.18	5384.42	4794.3	5332.21	48.0763	43.8861	40.7548	49.3952	45.9373	55.6182
LOC113219274	uncharacterized LOC113219274	113219274	86.0312	-0.93897	0.39357	-2.38577	0.0170432	0.169873	61.1729	54.9362	60.819	100.403	152.012	86.8439	0.191442	0.156777	0.15259	0.238663	0.413627	0.250201
UHRF1	ubiquitin-like with PHD and ring finger domains 1	724805	458.596	-0.460415	0.193159	-2.38361	0.0171438	0.170293	442.148	386.416	328.636	534.706	511.018	548.649	2.7346	2.10205	1.69855	2.7545	2.70817	2.8633
LOC410129	casein kinase I	410129	4301.98	0.287027	0.120437	2.38322	0.0171618	0.170293	4553.89	4900.5	4731.08	4207.6	3482.26	3936.58	31.1444	34.0879	32.0211	27.912	22.9831	27.9702
LOC726158	glutathione hydrolase 1 proenzyme	726158	7665.11	-0.385285	0.161658	-2.38333	0.0171566	0.170293	6369.72	5994.56	7578.91	10075.4	8181.69	7790.41	40.4808	36.2302	43.5124	53.696	47.3433	48.7848
LOC408372	poly(rC)-binding protein 3	408372	2244.9	0.556059	0.23334	2.38304	0.0171702	0.170293	2366.38	3578.3	2072.12	1685.84	1752.99	2013.76	13.9458	20.6072	11.422	8.31918	9.26066	11.7036
LOC410365	laccase 2	410365	790.251	0.725077	0.304195	2.38359	0.0171446	0.170293	808.411	705.79	1440.45	649.119	616.672	521.063	2.03914	1.57461	3.14986	1.48146	1.46955	1.28724
LOC409158	C-terminal-binding protein	409158	6774.32	-0.22687	0.0952621	-2.38153	0.0172407	0.170823	5925.25	6501.09	6302.77	7160.16	7602.75	7153.89	6.33643	7.89856	6.771	6.34405	5.13225	4.56406
LOC102653637	odorant receptor 4-like	102653637	32.2865	2.08068	0.874841	2.37835	0.0173904	0.171966	67.3676	24.2092	65.087	8.17236	24.7963	4.08677	0.695371	0.177817	0.354208	0.0399658	0.224958	0
LOC102656563	uncharacterized LOC102656563	102656563	97.9542	1.1675	0.49107	2.37747	0.0174319	0.172093	171.129	171.326	64.02	60.709	58.2173	62.3232	0.76572	0.747177	0.259613	0.233491	0.257193	0.297148
LOC550901	protein phosphatase methylesterase 1	550901	2065.32	-0.286809	0.120642	-2.37735	0.0174376	0.172093	1916.49	1835.24	1829.91	2392.17	2057.01	2361.13	16.9862	15.7548	14.2565	18.3544	15.9518	20.4109
LOC725784	uncharacterized LOC725784	725784	1031.7	-0.633578	0.266703	-2.37559	0.0175207	0.172235	863.389	766.313	795.983	1764.06	956.273	1044.17	6.8346	5.88979	5.58311	12.4213	7.01643	8.23207
LOC412288	WD repeat-containing protein 7	412288	4591.22	0.280364	0.118009	2.37577	0.0175122	0.172235	4550.02	5249.67	5309.4	4059.33	4002.98	4375.91	9.21762	10.9583	10.4975	7.2541	6.95978	8.05504
LOC413144	actin related protein 11	413144	1679.39	-0.341154	0.143599	-2.37575	0.0175133	0.172235	1671.8	1326.85	1445.79	1810.76	1972.92	1848.24	17.8424	13.6803	14.1573	17.8976	19.3711	19.8055
LOC412505	translocation protein SEC63 homolog	412505	9676.14	-0.242038	0.101911	-2.37499	0.0175495	0.17235	8897.17	8286.05	9416.28	10858.7	10042.5	10556.1	47.7927	42.1593	45.5989	49.6515	49.436	56.3835
LOC726312	receptor-binding cancer antigen expressed on SiSo cells	726312	2597.23	-0.445243	0.187719	-2.37186	0.0176986	0.173474	2494.15	2069.88	2033.7	3310.97	3303.29	2371.35	7.76353	5.52848	7.25058	6.83823	7.7008	6.87179
LOC100579019	probable salivary secreted peptide	100579019	3319.94	2.72636	1.14973	2.37129	0.0177259	0.173572	1495.25	10595.2	5214.43	98.0683	1019.88	1496.78	55.2358	374.778	178.881	3.21911	34.6712	54.6613
LOC411405	uncharacterized LOC411405	411405	17756.2	-0.476743	0.201225	-2.3692	0.0178266	0.173967	16166.7	17317	11061.6	22820.7	17991.3	21179.7	0.98908	3.60513	1.47718	3.02931	2.57714	1.01469
LOC409165	calreticulin	409165	23051.9	-0.437125	0.1845	-2.36924	0.0178244	0.173967	17853.2	16690.4	24215.6	29922.5	23724.6	25905	210.199	186.935	256.79	303.342	251.932	299.396
Mir3773	microRNA 3773	100629080	1097.71	0.322949	0.136322	2.36901	0.0178356	0.173967	1248.24	1242.12	1169.43	953.831	1069.47	903.176	0	0	0	0	0	0
LOC411458	histone-arginine methyltransferase CARMER	411458	252.309	0.532663	0.224751	2.37002	0.0177874	0.173967	259.404	297.959	338.239	196.137	217.776	204.339	1.25525	1.39114	1.35364	0.808452	1.01444	0.811333
LOC551500	phosphatidylinositol 4,5-bisphosphate 3-kinase catalytic subunit delta isoform	551500	5801.28	0.349264	0.147502	2.36787	0.017891	0.174338	5612.42	7571.88	6316.64	4943.11	5069.22	5294.41	12.3965	12.8982	12.0442	10.0905	11.0778	11.3757
LOC410726	putative E3 ubiquitin-protein ligase UBR7	410726	4584.13	-0.255336	0.107857	-2.36735	0.0179162	0.174413	4350.24	4004.76	4183.71	4650.07	4999.14	5316.89	42.5176	36.9988	38.0903	38.5341	44.6716	50.1631
LOC107965787	uncharacterized LOC107965787	107965787	60.8148	9.24796	3.90744	2.36676	0.0179446	0.174521	129.315	235.574	0	0	0	0	1.50654	1.29215	1.6795	1.48897	1.58636	1.42327
LOC409655	sorbin and SH3 domain-containing protein 1	409655	41888.1	0.246877	0.104419	2.36431	0.0180639	0.17551	42242.6	48760.1	45388.1	38928.5	36350.2	39659	119.814	144.177	124.481	102.516	87.8696	102.843
LOC726611	uncharacterized LOC726611	726611	657.267	1.00219	0.424481	2.36097	0.0182271	0.176412	754.207	1284.95	591.118	381.766	679.202	252.358	13.4625	22.3017	10.3207	5.73235	11.4381	4.59589
LOC408373	phosphatidylinositol 4-kinase beta	408373	5371.39	0.339309	0.143664	2.36182	0.0181855	0.176412	5281.77	6146.34	6572.72	5236.15	4675.71	4315.63	15.4308	17.0071	17.1991	13.1389	12.5117	12.3372
LOC113218527	uncharacterized LOC113218527	113218527	656.522	0.865269	0.366446	2.36124	0.0182137	0.176412	601.662	921.811	1020.05	301.21	706.154	388.243	2.6854	2.82085	2.65934	0.900924	2.20387	1.52096
LOC724852	LHFPL tetraspan subfamily member 6 protein	724852	3620.74	0.587782	0.24926	2.3581	0.0183686	0.177439	4988.3	5059.72	2996.14	3302.8	2290.96	3086.53	27.7125	26.9551	14.7237	15.8411	11.2149	16.718
LOC551409	uncharacterized LOC551409	551409	14191.7	0.43543	0.184626	2.35844	0.0183518	0.177439	12626.4	19778.9	16547	12566.8	12373.3	11258	31.1995	45.6104	40.8802	28.0074	24.0715	24.6391
LOC410198	kinesin-related protein 4	410198	952.011	0.285065	0.121041	2.35512	0.0185169	0.178699	1009.74	1081.96	1045.66	880.28	848.463	845.961	4.55983	4.7908	4.39424	3.50409	3.52276	3.90305
LOC100578041	uncharacterized LOC100578041	100578041	515.128	2.52096	1.07104	2.35375	0.0185853	0.179187	358.519	1579.18	694.617	19.8472	142.309	296.291	4.48106	19.2833	8.0921	0.219638	1.61971	3.65783
LOC100577943	scavenger receptor class B member 1	100577943	1197.24	-0.540313	0.229625	-2.35302	0.0186217	0.179366	1301.67	825.905	798.117	1429	1419.86	1408.91	5.99498	4.08678	2.78967	5.92138	6.70814	5.88809
LOC410566	putative inorganic phosphate cotransporter	410566	3279.76	0.382236	0.162711	2.34918	0.0188149	0.181053	3346.7	4323.2	3465.62	2581.3	3186.86	2774.92	6.69952	11.9441	5.84777	3.20347	3.65095	4.05719
LOC550671	venom serine protease Bi-VSP	550671	56094.8	-0.465439	0.198797	-2.34128	0.0192176	0.18422	41178.6	61266.9	38926.3	61380.3	63344.7	70472.3	473.289	679.396	403.172	625.568	676.701	815.047
LOC726761	paired box protein Pax-5	726761	29.6404	1.84745	0.790303	2.33765	0.0194053	0.185665	24.7789	85.6632	28.809	8.17236	15.0934	15.3254	0.134418	0.388635	0.115237	0.0183547	0.0714613	0.0800225
LOC551144	uncharacterized LOC551144	551144	11756.5	-0.420197	0.180144	-2.33257	0.0196709	0.187669	11649.2	10676.2	7842.46	13931.5	12129.7	14309.8	69.6572	60.7776	42.7224	72.9818	66.1909	84.3722
LOC107965532	uncharacterized LOC107965532	107965532	122.678	0.726569	0.311574	2.33193	0.0197044	0.18781	133.961	157.36	167.519	98.0683	104.576	74.5836	1.70001	2.18423	2.04368	0.869123	1.3342	0.902236
LOC551883	voltage-dependent T-type calcium channel subunit alpha-1G	551883	2856.81	-0.360756	0.154817	-2.33021	0.0197953	0.188497	2668.38	2571.76	2263.11	3525.79	3379.84	2732.01	2.95476	2.79097	2.39824	3.62192	3.52015	3.11497
LOC552097	39S ribosomal protein L14, mitochondrial	552097	8276.32	-0.21251	0.0912977	-2.32765	0.0199304	0.189604	8052.36	7640.79	7308.95	9093.5	8815.61	8746.71	42.288	36.7763	37.3791	35.4468	42.8873	44.4996
LOC413288	polycomb protein Pcl	413288	764.821	-0.370098	0.159195	-2.3248	0.0200825	0.190689	720.91	673.201	607.123	782.212	920.696	884.786	0.642971	0.750643	0.565679	0.53079	0.635202	0.762973
LOC411739	stromal interaction molecule homolog	411739	2450.37	-0.399357	0.171764	-2.32503	0.0200706	0.190689	2027.22	1950.7	2362.34	3312.14	2510.89	2538.91	11.8855	10.9769	11.6972	16.7624	13.0491	14.3037
LOC725157	uncharacterized LOC725157	725157	117.712	-1.14549	0.493032	-2.32335	0.0201602	0.191246	93.6951	57.7296	68.288	163.447	83.0135	240.098	0.783928	0.551109	0.6455	1.38111	0.707538	2.41712
LOC725596	leukocyte receptor cluster member 8 homolog	725596	18442.7	0.330983	0.142541	2.32201	0.0202324	0.191749	18433.9	19027.5	24186.8	16405.4	16290.1	16312.3	69.5434	70.4169	85.2365	53.691	55.5393	60.2929
LOC550975	uncharacterized LOC550975	550975	9990.08	-0.257908	0.11117	-2.31994	0.0203439	0.192624	9530.58	8927.6	8839.03	11938.7	10409	10295.6	220.496	192.05	166.835	232.306	209.391	230.729
LOC113218742	uncharacterized LOC113218742	113218742	61.1274	1.39838	0.602912	2.31938	0.0203747	0.192733	38.717	138.737	88.5611	29.187	39.8896	31.6725	0.213969	0.814209	0.744313	0.198964	0.308954	0.159955
LOC726655	carcinoembryonic antigen-related cell adhesion molecule 1-like	726655	119.741	0.995422	0.429389	2.31823	0.0204368	0.193139	150.996	132.219	195.261	102.738	45.2801	91.9523	1.83658	1.91212	2.31311	1.03702	0.503212	1.04052
LOC100576139	uncharacterized LOC100576139	100576139	174.094	0.941611	0.406318	2.31742	0.0204807	0.193227	199.78	171.326	315.832	162.28	81.9354	113.408	2.06253	1.60986	3.78081	1.73828	1.0104	1.11827
LOC727088	general transcription factor IIF subunit 1	727088	1689.07	-0.361237	0.155884	-2.31735	0.0204847	0.193227	1533.97	1303.57	1598.37	2068.77	1945.97	1683.75	11.7998	9.53243	10.9419	13.6678	13.4833	12.9526
LOC551524	zinc carboxypeptidase	551524	38.9754	2.8212	1.21793	2.3164	0.0205367	0.193358	23.2302	99.6301	82.1591	0	4.31239	24.5206	0.270395	1.21376	0.953647	0	0.0426968	0.309567
LOC725390	leucine-rich melanocyte differentiation-associated protein	725390	4544.68	-0.355295	0.153384	-2.31639	0.0205372	0.193358	4491.95	4123.94	3346.11	5483.65	5016.39	4806.04	52.4907	50.8076	41.363	57.4122	57.3045	60.3902
LOC102654768	transcription termination factor 5, mitochondrial	102654768	309.84	-0.537046	0.231959	-2.31527	0.0205984	0.193389	284.183	208.571	265.683	337.402	351.46	411.742	3.83978	2.90265	3.05635	4.29393	4.37446	5.35356
LOC410577	acid sphingomyelinase-like phosphodiesterase 3a	410577	1052.95	1.28091	0.553192	2.31549	0.0205863	0.193389	492.48	2725.39	1257.99	477.499	963.82	400.503	3.33789	17.919	7.6739	2.64909	7.02694	2.58805
LOC552319	26S proteasome non-ATPase regulatory subunit 6	552319	6260.74	-0.324139	0.139981	-2.31559	0.0205809	0.193389	6282.99	5616.53	4780.16	6816.92	6779.08	7288.75	79.8706	67.594	54.5924	73.4948	77.6544	90.1149
LOC726790	uncharacterized LOC726790	726790	11279.2	0.388082	0.167645	2.3149	0.0206186	0.193398	10243	14098.1	14021.5	8899.7	10512.5	9900.2	24.4673	32.4429	31.103	17.7911	22.4143	24.17
LOC724424	sprT-like domain-containing protein Spartan	724424	518.2	-0.441238	0.190651	-2.31437	0.0206473	0.193486	494.029	428.316	395.857	524.199	642.546	624.254	3.42563	2.94559	2.59332	3.29457	4.20032	4.49117
LOC100577739	telomere-associated protein RIF1-like	100577739	811.583	0.428485	0.185172	2.31398	0.0206691	0.19351	802.99	909.706	1081.94	670.134	642.546	762.183	1.42241	1.55184	1.7469	0.995305	1.02135	1.28209
LOC410161	afadin	410161	4059.93	0.343911	0.14875	2.31201	0.020777	0.194338	3833.76	4589.5	5202.7	3509.45	3627.8	3596.36	7.11919	8.63645	9.15809	5.80168	5.90629	6.39228
LOC552574	exocyst complex component 5	552574	22196.4	-0.172135	0.0744896	-2.31086	0.0208406	0.194752	20843.7	20586.2	21191.7	23868	23430.3	23258.8	9.88981	7.691	7.3911	8.03149	9.51039	11.6377
LOC724497	protein patched homolog 3	724497	1861.78	0.332079	0.143778	2.30967	0.0209066	0.195165	2059.74	2013.09	2153.21	1538.74	1514.73	1891.15	9.49254	9.36713	9.26656	6.38849	6.50317	8.49749
LOC102655506	uncharacterized LOC102655506	102655506	55.2597	1.00727	0.436168	2.30936	0.0209237	0.195165	75.8853	63.3163	82.1591	44.3642	28.0305	37.8026	0.623898	0.348726	0.547673	0.280791	0.170814	0.17481
LOC410006	uncharacterized LOC410006	410006	4113.97	0.45501	0.197109	2.30841	0.0209761	0.195379	4663.85	4161.18	5448.11	2726.07	3582.52	4102.1	9.56037	7.48162	7.88309	4.79252	5.6086	7.25072
LOC100577981	insulin-like growth factor-binding protein complex acid labile subunit	100577981	212.395	1.59089	0.689222	2.30824	0.0209856	0.195379	147.125	518.635	291.291	26.852	103.497	186.97	0.894933	3.07005	1.61619	0.160616	0.526717	1.25069
LOC410953	MLX-interacting protein	410953	12750	0.597889	0.259068	2.30785	0.0210076	0.195402	9343.96	18650.4	18070.7	10816.7	10054.3	9564.06	34.7022	67.0841	62.3862	34.914	34.5897	34.5867
LOC411298	UDP-glucuronosyltransferase 2C1	411298	191.764	0.957977	0.415164	2.30747	0.0210288	0.195418	200.554	202.985	356.378	131.925	83.0135	175.731	0.825397	0.627836	1.56922	0.583178	0.38746	0.863583
LOC100577317	uncharacterized LOC100577317	100577317	1988.73	0.544146	0.23622	2.30355	0.0212478	0.196905	2599.46	2135.99	2343.13	1262.05	1415.54	2176.21	13.2397	10.1422	10.9805	5.51049	6.6634	10.7699
LOC413766	protein suppressor of hairy wing	413766	2151.85	0.259651	0.112705	2.30381	0.0212333	0.196905	2439.17	2397.64	2196.95	2051.26	1949.2	1876.85	18.6454	17.8424	14.8162	13.5214	13.8519	14.6048
LOC102655710	basic proline-rich protein	102655710	230.449	1.08073	0.469088	2.3039	0.0212284	0.196905	270.245	501.875	166.452	185.629	156.324	102.169	0.994384	1.66609	0.578822	0.518397	0.587304	0.419653
LOC410044	rho GTPase-activating protein 20	410044	5173.81	0.26429	0.114789	2.30239	0.0213131	0.197328	5253.12	5511.31	6175.8	4827.53	4475.18	4799.91	14.8216	14.4335	14.7212	11.5146	11.122	12.8453
LOC100577932	uncharacterized LOC100577932	100577932	344.631	-0.571355	0.248508	-2.29914	0.0214968	0.197799	256.307	301.684	274.219	311.717	453.879	469.979	2.42281	3.81893	2.53924	3.44361	3.9713	4.63114
LOC413590	alkylglycerol monooxygenase	413590	231.836	1.80297	0.784047	2.29956	0.0214729	0.197799	119.248	807.283	154.715	44.3642	190.823	74.5836	0.730068	6.15807	1.13934	0.330593	1.16295	0.622923
LOC409370	brefeldin A-inhibited guanine nucleotide-exchange protein 1	409370	2295.96	0.330565	0.143783	2.29905	0.021502	0.197799	2322.25	2703.05	2648.3	2290.6	1907.16	1904.43	6.23312	6.99943	6.53798	5.20806	4.58995	4.97713
LOC727210	single-stranded DNA-binding protein, mitochondrial	727210	3708.08	-0.267269	0.116228	-2.29952	0.0214755	0.197799	3610.75	3395.8	3088.97	4120.04	3834.79	4198.13	127.639	113.84	93.9594	117.193	113.377	136.896
LOC551573	tyrosine-protein phosphatase non-receptor type 4	551573	466.45	0.365896	0.159091	2.29992	0.0214528	0.197799	528.874	530.74	516.428	375.929	424.771	421.959	1.46169	2.01244	1.79848	0.909614	1.10471	1.08393
LOC552202	monocarboxylate transporter 9	552202	371.009	-1.34642	0.586277	-2.29655	0.0216445	0.198745	58.0755	345.446	225.137	560.39	722.326	314.681	0.405203	2.2137	1.18474	2.13781	3.44225	1.17007
LOC411157	fat-like cadherin-related tumor suppressor homolog	411157	5659.1	0.468087	0.203918	2.29546	0.0217067	0.198952	5434.32	6247.83	8025.98	5484.82	3898.4	4863.26	4.64346	5.10668	6.15406	3.99843	3.02473	4.01502
LOC413275	cytoplasmic phosphatidylinositol transfer protein 1	413275	1549.05	-0.296175	0.129016	-2.29564	0.0216964	0.198952	1293.92	1458.14	1420.18	1818.93	1581.57	1721.55	9.38098	10.046	9.23713	11.3107	10.3483	12.5712
LOC100578799	uncharacterized LOC100578799	100578799	779.983	0.786456	0.343183	2.29165	0.0219256	0.200775	739.495	682.512	1540.75	650.286	570.314	496.543	2.25255	1.9853	4.0131	1.6806	1.54633	1.44448
Su(var)3-9	suppressor of variegation 3-9	685996	14220.6	-0.204055	0.0890638	-2.29111	0.0219568	0.200877	12721.6	14005.9	12922.4	15351.2	15127.9	15194.6	137.628	146.852	127.509	145.227	151.819	164.403
LOC102653863	uncharacterized LOC102653863	102653863	17.1577	2.64754	1.15577	2.29071	0.0219804	0.200909	19.3585	21.4158	48.015	7.00488	0	7.15185	0.0736059	0.0810175	0.178874	0.0303882	0	0.0184913
LOC410581	uncharacterized LOC410581	410581	226.4	0.605862	0.264592	2.28979	0.0220333	0.201209	217.59	294.235	308.363	166.95	202.682	168.579	0.749816	1.15567	1.09138	0.530512	0.665497	0.653181
LOC100578774	centrosomal protein of 164 kDa	100578774	4995.38	0.4966	0.216995	2.28853	0.0221065	0.201694	4113.29	6401.46	7026.2	4344.19	4264.96	3822.15	4.10802	8.09837	8.12509	5.13149	4.30699	4.79086
LOC413086	DNA ligase 3	413086	8281.74	0.814502	0.355983	2.28804	0.0221355	0.201775	4972.81	16176.4	10529.2	6469.01	5955.41	5587.64	21.4436	62.5953	36.5106	23.1365	20.2177	23.3722
LOC551386	26S protease regulatory subunit 10B	551386	8811.58	-0.239546	0.104867	-2.28429	0.0223548	0.203589	8523.93	8269.29	7450.87	9353.85	9302.91	9968.65	90.9622	85.194	74.0789	91.8529	94.2983	111.127
LOC726024	WW domain-binding protein 4	726024	1971.12	0.697045	0.305308	2.28309	0.0224253	0.204046	1591.27	3690.04	2033.7	1393.97	1553.54	1564.21	13.8174	14.8756	13.161	11.9352	13.1556	13.3311
LOC552513	neural cell adhesion molecule 2	552513	5786.8	0.263824	0.115679	2.28065	0.022569	0.205037	6656.23	6626.8	5659.37	5108.89	5428.22	5241.28	21.2771	20.2332	16.4458	13.5346	15.0138	16.2815
LOC413620	uncharacterized LOC413620	413620	1981.85	-0.423257	0.185594	-2.28055	0.0225751	0.205037	1839.06	1473.04	1766.95	2734.24	1977.23	2100.6	2.53071	1.91405	2.88206	3.54084	1.86593	2.36518
LOC409530	unconventional myosin-Ie	409530	2453.87	0.43031	0.188813	2.27903	0.0226656	0.205672	2168.15	3149.05	3134.85	2259.07	2009.57	2002.52	8.28648	11.5211	10.5329	7.39677	6.87718	7.64224
LOC726262	adenylate cyclase type 8-like	726262	795.256	0.95225	0.417928	2.2785	0.0226966	0.205767	551.33	1493.52	1101.14	413.288	810.73	401.525	0.136	0.176358	0.503454	0.0884583	0.257992	0.0126866
LOC410609	disintegrin and metalloproteinase domain-containing protein 10-like	410609	772.754	-1.14152	0.501494	-2.27624	0.0228315	0.20591	384.073	442.283	619.927	1471.02	1400.45	318.768	0.774271	0.840736	1.17472	2.58292	2.55961	0.653883
LOC410030	protein SEC13 homolog	410030	4954.72	-0.255156	0.112115	-2.27583	0.0228561	0.20591	4574.8	4553.19	4424.85	5602.74	4867.61	5705.13	70.0597	67.1749	61.4495	75.3303	68.2556	84.4317
LOC102654542	uncharacterized LOC102654542	102654542	36.5795	1.63461	0.71809	2.27634	0.022826	0.20591	29.4249	86.5943	50.149	12.8423	11.8591	28.6074	0.226287	0.618964	0.368296	0.0803154	0.0780078	0.215205
LOC552645	mesencephalic astrocyte-derived neurotrophic factor homolog	552645	2538.63	-0.331622	0.145688	-2.27625	0.0228312	0.20591	2153.44	2056.85	2535.19	2776.27	2612.23	3097.77	29.6213	26.1719	30.9385	32.8295	32.7377	42.0016
LOC414009	microprocessor complex subunit DGCR8	414009	229.399	0.788839	0.346542	2.27632	0.0228271	0.20591	339.161	269.094	263.549	113.246	235.025	156.319	2.53846	2.12246	1.77673	0.783109	1.57973	1.01517
LOC409554	intersectin-1	409554	3578.63	0.286556	0.125887	2.27629	0.0228286	0.20591	3781.1	3879.99	4137.83	3466.25	2867.74	3338.89	5.85105	6.28283	6.6943	4.7898	3.96007	5.43096
LOC113219135	uncharacterized LOC113219135	113219135	37.8143	-1.13207	0.498127	-2.27265	0.023047	0.207258	29.4249	23.2781	18.139	50.2016	50.6706	55.1714	0.225368	0.0782533	0.086497	0.322643	0.341809	0.353675
LOC107964218	uncharacterized LOC107964218	107964218	3901.78	0.511824	0.225205	2.27271	0.0230438	0.207258	3308.75	5882.83	4568.9	3490.77	3235.37	2924.08	4.8602	4.43566	4.72731	3.80363	4.24283	3.59976
LOC411882	ER membrane protein complex subunit 2-B	411882	4057.34	-0.265008	0.116684	-2.27116	0.0231375	0.207885	3515.5	3477.74	4065.27	4396.73	4297.3	4591.49	44.1907	42.545	47.0228	49.2112	50.3969	57.6373
LOC100576803	uncharacterized LOC100576803	100576803	613.86	0.829519	0.365532	2.26935	0.0232471	0.20831	419.692	973.954	963.502	477.499	517.487	331.028	3.46629	5.59539	6.27712	2.56513	3.88772	1.6364
LOC411533	alpha-2-macroglobulin receptor-associated protein	411533	7585.28	-0.213711	0.0941651	-2.26953	0.023236	0.20831	7158	7095.15	6819.2	8540.12	8194.62	7704.58	96.454	90.9699	85.4862	100.445	101.403	101.586
LOC551956	proteasome subunit alpha type-5	551956	5905.43	-0.327781	0.144513	-2.26817	0.0233188	0.208375	5881.11	5444.27	4385.37	6632.45	6569.93	6519.42	89.342	76.6055	58.287	86.9583	91.1393	97.2284
LOC412917	probable serine/threonine-protein kinase dyrk2	412917	4510.14	0.244232	0.107693	2.26786	0.0233374	0.208375	4580.22	5009.44	5084.26	3977.6	4388.94	4020.36	8.78855	9.21007	8.98539	6.72963	7.73114	7.40618
LOC100577541	uncharacterized LOC100577541	100577541	316.478	-0.901154	0.39722	-2.26865	0.0232894	0.208375	203.651	256.99	201.663	381.766	227.479	627.319	0.388942	1.21975	0.717732	1.01474	0.420897	2.55976
LOC409353	WD repeat-containing protein 43	409353	1747.96	-0.396501	0.174803	-2.26827	0.0233126	0.208375	1307.86	1471.17	1749.88	2066.44	1733.58	2158.84	10.0431	10.5663	12.1661	13.5401	12.399	16.382
LOC413768	2-oxoglutarate dehydrogenase, mitochondrial	413768	290.782	0.744954	0.328802	2.26566	0.0234719	0.209203	241.594	489.77	361.713	185.629	236.103	229.881	0.447854	1.28396	0.789139	0.361101	0.669985	0.544207
LOC410915	aquaporin AQPAn.G	410915	7043.56	0.605468	0.267563	2.2629	0.023642	0.210532	8869.29	11225.6	5405.43	5986.84	4675.71	6098.48	73.7924	90.1494	40.9462	42.6806	34.1909	50.6227
LOC409861	nucleoside diphosphate kinase	409861	20886.9	0.269958	0.119325	2.26238	0.023674	0.210629	23179.9	23950.3	21375.2	18647	20863.4	17305.4	608.982	594.323	505.175	417.368	495.86	450.336
LOC408675	probable 39S ribosomal protein L24, mitochondrial	408675	3264.81	-0.25418	0.112444	-2.26051	0.0237895	0.211095	3064.06	2974	2895.84	3285.29	3538.32	3831.35	50.0892	46.1627	42.6728	45.8761	51.9655	60.6159
LOC413123	uncharacterized LOC413123	413123	2991.23	0.478391	0.211621	2.26061	0.0237836	0.211095	2860.41	3095.05	4493.14	2766.93	2506.58	2225.25	11.1186	11.369	15.4635	9.15467	9.1736	8.71154
LOC726106	zwei Ig domain protein zig-8	726106	43.2112	1.36176	0.602723	2.25934	0.0238621	0.211552	75.111	40.0382	71.489	28.0195	12.9372	31.6725	0.509101	0.208771	0.410936	0.121535	0.0716323	0.163477
LOC413907	uncharacterized LOC413907	413907	149.892	0.890401	0.394328	2.25802	0.0239444	0.212094	161.837	255.127	167.519	67.7138	115.356	131.798	0.699233	1.09619	0.588806	0.297056	0.462123	0.602384
LOC100577931	TELO2-interacting protein 2	100577931	2275.74	-0.217108	0.096244	-2.25581	0.0240828	0.213131	2134.86	2059.64	2120.13	2375.82	2472.08	2491.91	21.1345	20.3175	19.0221	20.694	21.9871	25.0322
LOC113219268	uncharacterized LOC113219268	113219268	7388.07	-0.432382	0.191781	-2.25457	0.0241605	0.213255	7351.58	5867	5647.63	10413.9	7259.91	7788.36	125.414	92.4741	77.2682	165.522	113.761	131.473
LOC727349	RNA-binding protein 1	727349	1497.65	-0.351712	0.155994	-2.25464	0.0241558	0.213255	1502.22	1243.05	1201.44	1816.6	1545.99	1676.6	37.3578	29.2162	25.9554	39.4678	35.5968	38.122
LOC726215	uncharacterized LOC726215	726215	767.664	0.534817	0.237409	2.25272	0.0242766	0.213902	730.203	966.505	1028.59	654.956	736.341	489.391	0.526554	0.845741	0.823841	0.438123	0.382014	0.288372
LOC408981	activating transcription factor 3	408981	33907.3	0.325211	0.144388	2.25234	0.0243007	0.213927	34099.6	42854.9	36184.1	32259.8	26610.7	31434.4	161.834	195.579	154.266	130.938	113.554	145.365
LOC412084	leucine-rich repeat-containing protein 40	412084	3574.9	0.290522	0.129084	2.25065	0.0244077	0.214681	3803.56	3632.31	4366.17	3073.98	3121.09	3452.3	24.2701	22.5132	25.7592	16.9932	19.0557	22.4493
LOC409177	kinase D-interacting substrate of 220 kDa	409177	11424.4	0.621289	0.276526	2.24676	0.0246551	0.216376	8653.25	13853.2	19035.3	7874.65	10381	8748.75	16.7887	25.5568	34.2824	12.7003	16.861	15.1378
LOC410637	nuclear receptor coactivator 3	410637	1911.36	0.514113	0.228977	2.24526	0.0247515	0.216376	1719.81	2129.48	2896.91	1407.98	1515.81	1798.18	3.25738	4.59743	5.09407	2.4546	2.73897	3.5392
LOC410862	solute carrier family 41 member 3	410862	6521.42	-0.626054	0.278679	-2.24651	0.0246715	0.216376	4642.94	3921.89	6820.27	9711.1	8599.99	5432.34	18.9728	15.5319	25.271	34.2939	31.3467	21.6976
LOC107964202	uncharacterized LOC107964202	107964202	4925.65	0.511221	0.227677	2.24538	0.0247437	0.216376	4500.46	5248.73	7619.45	4313.84	4438.53	3432.89	17.318	19.6055	25.8535	14.6599	15.6609	12.5843
LOC551909	arf-GAP domain and FG repeat-containing protein 1	551909	4964.24	-0.194374	0.0865325	-2.24625	0.0246878	0.216376	4750.58	4646.3	4493.14	5404.27	5222.31	5268.87	44.4714	41.7004	38.5073	43.3889	45.2393	49.386
LOC100576413	uncharacterized protein PF11_0213	100576413	2755.98	0.279543	0.124493	2.24545	0.0247395	0.216376	3041.61	2752.4	3272.49	2642.01	2438.66	2388.72	3.2807	2.87147	3.17262	2.44655	2.47014	2.62014
LOC550645	max-binding protein MNT	550645	956.239	0.700787	0.312099	2.2454	0.0247423	0.216376	1063.17	745.829	1743.48	734.345	757.903	692.708	2.67638	3.12873	4.50239	1.94858	2.42446	2.17875
LOC100578899	muscle calcium channel subunit alpha-1	100578899	8394.98	0.353601	0.157559	2.24424	0.0248169	0.21657	9861.99	10328.9	8064.39	7743.9	6376.95	7993.72	12.991	13.6036	9.90333	8.96428	7.82018	10.9781
LOC412306	TBC1 domain family member 14	412306	146.699	0.871178	0.388132	2.24454	0.0247975	0.21657	168.032	188.087	213.4	67.7138	93.7945	149.167	0.9754	1.07289	1.16438	0.332903	0.464965	0.857122
LOC100578697	THUMP domain-containing protein 1 homolog	100578697	3644.98	-0.216921	0.0966807	-2.24369	0.0248525	0.216692	3510.86	3363.21	3239.41	3961.26	3780.89	4014.23	18.6456	16.2927	18.6301	18.4621	15.8599	15.6618
LOC411820	dual specificity protein phosphatase Mpk3	411820	1199.72	0.46454	0.207108	2.24298	0.0248978	0.216899	1122.02	1721.64	1330.55	905.965	1057.61	1060.52	3.92584	5.93921	4.4053	2.85472	3.23952	3.68985
LOC100576592	uncharacterized LOC100576592	100576592	1331.6	-0.674947	0.301187	-2.24095	0.0250291	0.217764	1339.61	1152.73	583.649	1680	1698	1535.6	14.4101	11.9667	6.04964	16.709	17.5351	17.0611
LOC113219286	uncharacterized LOC113219286	113219286	57.4012	1.56735	0.699655	2.24017	0.0250797	0.217764	93.6951	135.013	28.809	24.5171	20.4839	41.8894	0.910805	0.911056	0.170462	0.169939	0.163645	0.512912
LOC410771	WD repeat-containing protein 47	410771	12478.2	0.283967	0.126765	2.24011	0.025084	0.217764	12564.4	15334.6	13208.4	10528.3	11972.3	11261.1	10.7708	17.4126	11.6394	8.02389	8.77928	10.8836
LOC409845	potassium voltage-gated channel subfamily H member 8	409845	1553.15	0.640115	0.286225	2.2364	0.0253254	0.218024	1297.79	1959.08	2419.96	1520.06	916.383	1205.6	2.39634	3.36387	2.59281	1.95301	1.56856	1.72569
LOC726547	protein abrupt	726547	4318.88	0.376736	0.168361	2.23767	0.0252428	0.218024	4095.48	5209.63	5335	3236.25	3911.34	4125.59	6.02502	7.54672	6.90176	3.43265	4.49336	5.66652
LOC727185	serine/threonine-protein kinase SMG1	727185	5206.28	0.305185	0.136393	2.23754	0.0252509	0.218024	5236.86	5650.05	6378.53	4685.1	5057.36	4229.81	6.45867	6.54746	7.02273	4.99138	5.62382	5.04417
LOC100578611	uncharacterized LOC100578611	100578611	134.238	0.878431	0.392547	2.23777	0.0252358	0.218024	166.483	174.12	181.39	53.7041	114.278	115.451	0.483989	0.454489	0.433182	0.10341	0.277885	0.291649
LOC408697	KN motif and ankyrin repeat domain-containing protein 3	408697	11137.2	0.604533	0.270082	2.23833	0.0251992	0.218024	9290.53	16447.3	14574.2	7316.6	7460.44	11734.1	29.6541	49.4799	41.1568	19.9481	21.8715	36.6445
LOC550903	arginine--tRNA ligase, cytoplasmic	550903	3452.81	-0.235675	0.105264	-2.2389	0.0251625	0.218024	3125.24	3062.46	3326.91	3925.07	3528.61	3748.59	23.2896	22.2385	22.6636	25.5149	24.4198	28.1531
LOC727055	28S ribosomal protein S31, mitochondrial	727055	2375.34	-0.297906	0.133213	-2.23631	0.0253314	0.218024	2336.18	1947.91	2108.39	2412.01	2751.31	2696.25	36.8034	28.2312	32.7852	28.8491	38.4751	40.1687
LOC100577015	uncharacterized LOC100577015	100577015	806.341	0.502112	0.224516	2.23642	0.0253244	0.218024	803.765	1130.38	901.616	688.813	772.996	540.475	1.23764	1.7052	1.24661	0.876762	1.09799	0.88239
LOC409296	T-complex protein 1 subunit gamma	409296	12425.4	-0.198594	0.0887321	-2.23813	0.0252124	0.218024	11859.8	11613.9	11239.8	13846.3	12703.2	13289.2	105.936	99.2164	90.9898	105.326	103.002	116.933
LOC413813	ubiquitin carboxyl-terminal hydrolase isozyme L5	413813	5642.88	-0.194717	0.0870567	-2.23667	0.0253082	0.218024	5370.82	5380.02	5036.24	6019.53	6010.4	6040.25	63.0418	60.374	48.7187	59.1414	64.0919	68.3073
LOC552712	6-phosphogluconate dehydrogenase, decarboxylating	552712	17455.3	-0.210225	0.094035	-2.2356	0.025378	0.218238	17093.6	16314.2	15148.2	18608.5	18466.7	19100.5	162.261	148.171	131.284	154.519	161.731	179.903
LOC724631	60S ribosomal protein L29	724631	2750.88	-0.279111	0.12492	-2.23431	0.0254626	0.218591	2672.25	2506.58	2276.98	2875.5	3239.68	2934.3	54.5111	47.5598	42.7248	49.7023	61.1592	59.9239
LOC552746	17-beta-hydroxysteroid dehydrogenase 13	552746	2206.32	-0.294535	0.131809	-2.23456	0.0254464	0.218591	1963.73	1779.37	2203.36	2365.31	2510.89	2415.28	27.2987	23.8737	28.6764	28.745	32.6726	32.2553
LOC410555	insulin-like growth factor-binding protein complex acid labile subunit	410555	264.923	-0.728682	0.326514	-2.2317	0.0256348	0.219081	176.549	140.599	281.688	328.062	304.024	358.614	0.725503	0.519383	0.955339	1.12368	1.12129	1.43002
LOC551208	3-hydroxyisobutyrate dehydrogenase, mitochondrial	551208	652.27	-0.404539	0.181213	-2.23239	0.0255889	0.219081	553.653	593.125	537.768	628.104	761.137	839.831	6.10649	7.03184	6.6052	6.40547	8.97721	10.3365
LOC408835	neuroendocrine convertase 2	408835	782.649	0.585364	0.262295	2.2317	0.0256347	0.219081	784.406	785.867	1248.39	509.021	706.154	662.057	2.34911	2.23445	3.36644	1.32864	1.81838	1.94064
LOC102655953	putative uncharacterized protein DDB_G0286901	102655953	57.0219	1.0596	0.474845	2.23146	0.0256508	0.219081	58.8498	74.4898	98.1641	29.187	33.421	48.0196	0.432173	0.733984	0.848941	0.225032	0.364042	0.489961
LOC724172	neurobeachin	724172	19841.6	-0.394062	0.176548	-2.23204	0.0256125	0.219081	16878.3	13861.6	20706.2	24122.5	23019.5	20461.4	16.3023	12.8479	17.9513	20.1646	20.3863	19.4262
LOC113219162	uncharacterized LOC113219162	113219162	150.502	0.803514	0.360033	2.23178	0.0256295	0.219081	186.616	197.398	189.926	143.6	68.9983	116.473	0.215026	0.220504	0.192906	0.133929	0.0804544	0.134546
LOC102655724	uncharacterized LOC102655724	102655724	8360.86	-0.380175	0.170553	-2.22908	0.0258087	0.21997	8849.93	6724.56	6220.61	10211.9	8798.36	9359.73	54.8466	39.8416	35.285	53.2087	50.5747	57.4774
LOC411633	UDP-glucose 4-epimerase	411633	3443.36	0.386288	0.173297	2.22905	0.0258108	0.21997	3082.65	4434	4189.04	2933.88	3139.42	2881.17	21.7668	31.5771	32.0414	19.0182	21.5812	20.7879
LOC102654197	uncharacterized LOC102654197	102654197	220.025	-0.600524	0.269426	-2.2289	0.0258208	0.21997	195.134	170.395	158.983	219.486	252.275	323.877	4.63277	3.14454	3.48531	3.31557	3.74201	5.08042
LOC413653	uncharacterized LOC413653	413653	507.457	0.48078	0.215739	2.22852	0.0258456	0.219992	500.998	681.581	591.118	491.509	390.271	389.265	2.50824	3.73274	3.09205	2.23682	1.67719	2.25042
LOC726654	T-box protein H15	726654	166.121	0.66722	0.299443	2.2282	0.0258672	0.219992	199.78	175.051	236.874	121.418	156.324	107.278	1.06892	1.00563	1.04396	0.538792	0.813194	0.565365
LOC725812	uncharacterized LOC725812	725812	5284.69	-0.183102	0.0822139	-2.22714	0.0259377	0.220376	4898.47	5058.79	4892.2	5564.21	5656.78	5637.7	16.2892	17.2661	14.7207	16.3528	16.499	18.6987
LOC411789	protein krasavietz	411789	19490.1	-0.16751	0.0752224	-2.22687	0.0259563	0.220376	18077	18621.5	18381.2	20945.8	20332.9	20582	161.45	161.354	150.967	163.071	167.725	183.412
LOC102654762	uncharacterized LOC102654762	102654762	60.7163	1.40795	0.632379	2.22644	0.0259849	0.220432	51.8808	121.046	91.7621	21.0146	57.1392	21.4555	0.405201	0.911916	0.719986	0.146489	0.426776	0.147197
LOC726076	centrosomal protein of 131 kDa	726076	404.148	0.979987	0.440323	2.22561	0.0260404	0.220716	768.145	599.643	241.142	211.314	250.119	354.527	4.0705	2.74382	1.12179	0.656052	0.802521	1.90433
LOC102654584	uncharacterized LOC102654584	102654584	238.81	-0.652822	0.293501	-2.22426	0.026131	0.221254	197.457	229.987	129.107	288.368	301.867	286.074	3.43453	3.38606	2.00822	4.13832	3.84201	5.00938
LOC412079	uncharacterized LOC412079	412079	2172.14	-0.232068	0.104348	-2.22398	0.0261498	0.221254	1990.83	1919.04	2083.85	2419.02	2265.08	2355	12.2057	12.1578	12.5008	13.382	13.0702	14.0195
LOC113219132	uncharacterized LOC113219132	113219132	124.906	0.946126	0.425478	2.22368	0.0261701	0.221254	102.213	154.566	236.874	84.0586	99.185	72.5402	0.25914	0.387239	0.604319	0.197319	0.255819	0.206496
LOC409264	ATPase ASNA1 homolog	409264	6851.77	-0.243961	0.109857	-2.22071	0.0263706	0.222574	6833.55	6171.48	5815.15	7287.41	7312.74	7690.28	92.6471	79.379	72.2296	85.962	92.2596	104.273
LOC100578271	uncharacterized protein PF11_0213	100578271	3437.8	-0.285857	0.128848	-2.21856	0.0265167	0.222945	3306.43	2973.07	3015.34	3372.85	3868.22	4090.86	6.9255	5.90281	5.92264	6.01115	7.46684	8.4331
LOC726699	uncharacterized LOC726699	726699	1560.53	0.949011	0.427665	2.21906	0.0264829	0.222945	2446.91	1221.63	2499.98	502.016	1043.6	1649.01	9.10347	4.23516	8.35774	1.63969	3.54801	5.97773
LOC408967	calcium-binding mitochondrial carrier protein Aralar1	408967	11511.2	0.402867	0.181648	2.21785	0.0265651	0.223089	10657.2	12318.7	16349.7	9366.69	10164.3	10210.8	21.5283	24.031	29.8192	16.1193	18.4226	20.2238
LOC408464	protein HGV2	408464	1889.95	0.363239	0.163855	2.21682	0.0266351	0.223178	1797.24	2415.33	2168.15	1516.56	1763.77	1678.64	16.9267	21.8438	18.33	12.4143	15.4504	15.7341
LOC413370	hemicentin-2	413370	367.555	0.636276	0.287037	2.2167	0.0266434	0.223178	517.259	351.033	473.748	274.358	223.166	365.766	1.62211	1.00112	1.33315	0.725004	0.622957	0.975539
LOC725844	uncharacterized LOC725844	725844	669.701	0.516657	0.233104	2.21642	0.0266628	0.223178	705.424	1014.92	644.468	600.085	526.112	527.193	4.33668	5.93833	3.72309	3.22934	2.82691	3.07863
LOC412662	programmed cell death 6-interacting protein	412662	13810.9	-0.227748	0.102852	-2.21432	0.0268065	0.224106	12859.5	13405.4	11903.5	15450.4	14035.8	15211	71.7168	71.4704	59.4426	74.8887	71.8634	83.9949
LOC409602	circadian clock-controlled protein	409602	100155	-0.482216	0.217791	-2.21412	0.0268204	0.224106	102291	80492.7	67926.3	133341	127966	88909.7	1470.33	1098.04	885.755	1638.02	1652.28	1233.07
LOC411575	tau-tubulin kinase homolog Asator	411575	4749.29	0.205225	0.0928059	2.21134	0.0270124	0.225523	4858.98	5175.18	5226.17	4479.62	4274.66	4481.14	8.35387	10.5285	9.40295	6.61792	6.61752	7.88804
LOC409672	pinin	409672	2621.37	-0.220811	0.0999363	-2.20952	0.0271385	0.226199	2360.19	2542.89	2360.21	2895.35	2798.74	2770.83	17.0026	17.4633	15.4594	18.4218	18.6673	20.0838
LOC408427	piezo-type mechanosensitive ion channel component	408427	17291.7	0.282662	0.127964	2.20892	0.0271803	0.226359	16513.6	19804	20624.1	15841.5	16174.7	14792.1	16.2523	20.3315	21.1764	11.3254	13.0307	14.2298
LOC107965703	uncharacterized LOC107965703	107965703	1103.36	-0.486573	0.220316	-2.20852	0.0272081	0.226403	983.412	784.936	989.11	1086.92	1149.25	1626.53	0.534075	0.309114	0.0621387	0.537144	0.429519	0.762
LOC408433	UBX domain-containing protein 4	408433	13250.4	-0.210762	0.0954567	-2.20793	0.027249	0.226555	12380.9	12440.7	12030.4	15059.3	13302.7	14288.4	87.8448	84.2666	76.4582	92.4088	86.42	100.848
LOC113218800	dynein heavy chain 7, axonemal-like	113218800	6649.8	-0.212758	0.0964319	-2.2063	0.0273629	0.227309	6435.54	6130.51	5914.38	6792.4	7390.36	7235.63	0.269558	0.405637	0.382443	0.291085	0.360265	0.432004
LOC410355	translation initiation factor eIF-2B subunit beta	410355	1675.47	-0.343855	0.155874	-2.20599	0.027385	0.227309	1657.09	1415.31	1357.22	1651.98	1990.17	1981.06	21.6616	17.5502	16.533	18.9488	24.1947	25.4561
LOC409160	dihydropteridine reductase	409160	10226.5	-0.302366	0.137136	-2.20485	0.0274644	0.227467	10342.1	9057.95	8075.06	10732.6	10990.1	12161.2	224.384	192.76	160.511	208.823	223.235	268.359
LOC100577221	uncharacterized LOC100577221	100577221	463.671	-0.335421	0.152094	-2.20535	0.0274295	0.227467	425.887	406.9	396.924	510.189	527.19	514.933	3.31374	3.21552	2.6847	3.58929	3.77233	4.09101
LOC411552	ceramide glucosyltransferase	411552	183.464	0.696483	0.315948	2.20442	0.0274947	0.227467	181.196	273.75	226.204	108.576	145.543	165.514	0.917629	1.33476	1.08299	0.48843	0.720756	0.87243
LOC411054	polypeptide N-acetylgalactosaminyltransferase 2	411054	1875.56	0.657293	0.298423	2.20255	0.0276262	0.228178	1811.18	2379.02	2697.38	898.96	1527.66	1939.17	5.57504	7.80883	7.6459	2.12935	3.92066	5.57443
LOC725207	dynactin subunit 4	725207	2700.02	-0.242698	0.11035	-2.19936	0.0278526	0.22948	2561.52	2408.81	2449.83	2749.42	3134.03	2896.5	23.2864	20.6514	20.3146	21.3075	26.3998	26.2629
LOC100578540	coiled-coil-helix-coiled-coil-helix domain-containing protein 2-like	100578540	98778.2	-0.184453	0.0838612	-2.1995	0.0278424	0.22948	90650.4	96152.3	90614	107643	101268	106342	2.78464	3.67629	4.57783	3.36397	5.06075	3.09044
LOC113219234	uncharacterized LOC113219234	113219234	331.801	0.650338	0.295825	2.19839	0.0279216	0.229672	350.002	388.278	478.016	294.205	177.886	302.421	8.53576	7.9035	7.19008	5.94773	5.25363	5.0907
LOC107964791	titin-like	107964791	153.616	-1.42021	0.64595	-2.19863	0.0279041	0.229672	135.509	60.5229	54.417	136.595	103.497	431.154	0.349359	0.156054	0.131635	0.227234	0.20084	1.13109
Ripk5	receptor interacting protein kinase 5	412747	4541.53	0.413545	0.188183	2.19757	0.02798	0.229964	4484.98	6599.79	4479.27	4005.62	3777.66	3901.84	9.36206	9.49186	8.72273	9.0019	9.07091	9.08589
LOC102655018	uncharacterized LOC102655018	102655018	2680.87	-0.511122	0.232625	-2.19719	0.0280068	0.229995	2396.58	2561.52	1674.12	2429.53	3659.06	3364.43	22.5967	19.6352	11.2219	16.563	27.0485	24.8555
LOC100578102	ankyrin repeat domain 50	100578102	3646.16	0.469363	0.213745	2.1959	0.0280993	0.230377	3122.91	5150.97	4429.12	3061.13	2714.65	3398.15	7.68277	12.1305	9.70827	6.47174	6.07036	8.16735
LOC113218807	uncharacterized LOC113218807	113218807	21.8335	1.45207	0.661611	2.19476	0.0281811	0.23086	24.0045	33.5204	38.412	14.0098	11.8591	9.19523	0.12184	0.0939486	0.0691423	0.035228	0.0342347	0.0530919
LOC726853	protein scarlet	726853	43.9064	1.17588	0.535911	2.19417	0.0282229	0.230968	43.363	67.9719	71.489	23.3496	20.4839	36.7809	0.119475	0.276597	0.395508	0.143706	0.13339	0.180964
LOC100576504	uncharacterized LOC100576504	100576504	1326.6	-0.470822	0.214602	-2.19393	0.0282404	0.230968	1310.18	976.747	1048.86	1200.17	1736.82	1686.81	4.48368	3.19074	3.48489	3.81628	5.91718	5.64412
LOC551073	single-stranded DNA-binding protein 3	551073	13358.5	0.160908	0.0733606	2.19338	0.0282801	0.231104	14113.9	14113.9	14080.1	12572.6	12649.3	12621	27.6761	26.3109	26.7356	22.2644	22.1055	23.4226
LOC102655120	hepatocyte nuclear factor 4-gamma	102655120	2603.74	0.396213	0.180678	2.19293	0.0283127	0.231182	2700.9	3500.09	2676.04	2468.05	1905	2372.37	26.1574	33.4526	24.0912	20.5363	15.5968	22.4282
LOC408668	probable tyrosyl-DNA phosphodiesterase	408668	53925.6	-0.275171	0.125599	-2.19088	0.0284608	0.232013	52693.8	48580.4	45120.3	57531.1	54191.7	65436.3	20.2654	21.2339	21.6972	20.3075	20.4849	22.4069
LOC113219370	organic cation transporter protein-like	113219370	9251.54	0.455886	0.208413	2.18741	0.0287124	0.233874	7955.57	11589.7	12559.7	6607.94	8197.86	8598.56	139.376	197.268	199.026	105.083	131.893	150.282
LOC726476	alpha-1,6-mannosyl-glycoprotein 2-beta-N-acetylglucosaminyltransferase	726476	23043.4	0.358283	0.163909	2.18586	0.0288258	0.234417	24330.5	31173	22166.9	18808.1	19895.2	21886.7	125.006	155.617	101.159	85.1279	93.4813	113.019
LOC410918	protein tramtrack, beta isoform	410918	12257.9	-0.279758	0.127975	-2.18604	0.028813	0.234417	12608.6	10660.4	9948.71	13796.1	13287.6	13246.2	11.212	9.97733	7.53329	11.0395	9.39045	10.1705
LOC102654870	uncharacterized LOC102654870	102654870	108.645	0.743695	0.340298	2.18542	0.0288581	0.23449	147.899	147.117	113.102	73.5512	70.0764	100.126	0.982858	0.971553	0.77668	0.50801	0.438551	0.624386
LOC725298	MATH and LRR domain-containing protein PFE0570w-like	725298	1784.26	-0.30201	0.138235	-2.18475	0.0289069	0.234696	1784.85	1499.11	1509.81	1880.81	1921.17	2109.8	7.3986	5.94889	5.73269	6.92749	7.32249	8.87908
LOC412002	E3 ubiquitin-protein ligase Ubr3	412002	1653.56	0.330588	0.151377	2.18387	0.0289721	0.234844	1763.17	1828.72	1934.47	1692.85	1323.9	1378.26	4.02322	4.06968	4.11003	3.35716	2.78086	3.16924
LOC408868	inositol monophosphatase 2	408868	7323.75	-0.880832	0.403309	-2.18401	0.0289614	0.234844	6828.13	6750.63	1885.39	8704.73	10501.8	9271.86	126.902	118.486	31.6884	141.634	179.613	173.021
LOC100577071	uncharacterized LOC100577071	100577071	406.774	0.504426	0.231012	2.18355	0.0289954	0.234844	416.595	498.15	517.495	284.865	315.883	407.655	0.91907	1.31405	1.09688	0.368626	0.534946	0.555917
LOC724235	uncharacterized LOC724235	724235	9484.3	-0.274949	0.126021	-2.18177	0.0291265	0.235715	7893.62	8837.28	9019.36	11114.4	10772.4	9268.8	24.9755	28.0821	26.1142	33.4816	31.1499	27.9285
LOC726616	uncharacterized LOC726616	726616	14748.6	-0.225399	0.103444	-2.17895	0.0293351	0.236639	13118.9	12990.1	14688.3	16557.2	15228.1	15908.8	91.9873	96.2413	97.1583	101.058	99.7409	119.104
LOC102654660	uncharacterized LOC102654660	102654660	23.2245	2.11902	0.972634	2.17864	0.0293586	0.236639	13.9381	35.3826	64.02	4.66992	17.2496	4.08677	0.206469	0.387043	0.68474	0.043449	0.175651	0.0607119
LOC102655968	uncharacterized LOC102655968	102655968	659.06	0.525405	0.241118	2.17904	0.0293286	0.236639	706.198	775.625	851.467	665.464	396.74	558.866	8.58415	8.59123	9.54972	9.28167	5.12137	6.49905
Syx1A	syntaxin 1A	410279	18353.6	0.265214	0.121697	2.1793	0.0293094	0.236639	18938	22452.1	18717.3	16522.2	17592.4	15899.6	45.46	52.8231	41.4393	34.7606	38.0355	38.6021
LOC725706	putative mediator of RNA polymerase II transcription subunit 26	725706	1264.95	0.314707	0.144523	2.17757	0.0294383	0.237008	1378.33	1252.36	1577.03	1128.95	1116.91	1136.12	0.96399	1.1104	1.36188	0.792201	0.567954	0.756546
LOC550827	tubulin alpha-1 chain	550827	37129.5	-0.427655	0.196408	-2.17739	0.0294517	0.237008	37718.1	32602.3	24677.6	41317.1	37127.5	49334.5	422.634	350.634	252.547	400.083	378.437	548.099
LOC413693	cilia- and flagella-associated protein 251	413693	914.016	0.40202	0.18489	2.17438	0.0296769	0.238247	995.027	1187.18	938.961	907.132	700.764	755.031	0.498143	0.480075	0.529847	0.324049	0.0899867	0.325575
LOC409246	MAP kinase-activated protein kinase 2	409246	7926.63	0.218501	0.100512	2.17388	0.0297139	0.238329	8278.47	8708.78	8590.42	7474.21	6793.1	7714.8	37.4	38.0045	36.9331	27.4724	27.3373	30.9476
LOC724719	NADH dehydrogenase [ubiquinone] 1 beta subcomplex subunit 11, mitochondrial	724719	5447.26	-0.205459	0.0945247	-2.17361	0.0297347	0.238329	5040.18	5210.56	4929.54	5649.44	5705.29	6148.55	129.794	128.798	117.243	128.341	132.499	158.055
LOC409788	SAFB-like transcription modulator	409788	4896.95	0.409705	0.188794	2.17012	0.029998	0.240061	4485.75	5262.7	7015.53	4354.7	4034.24	4228.79	22.6521	24.6286	31.2996	18.0255	18.239	20.13
LOC725013	sister chromatid cohesion protein DCC1	725013	461.834	-0.352537	0.162451	-2.17011	0.0299986	0.240061	398.785	433.903	384.12	531.203	532.58	490.412	2.14295	2.087	2.05654	2.67208	3.03435	2.91128
LOC410347	protein big brother	410347	7565.88	0.40087	0.184761	2.16967	0.0300322	0.240138	9489.54	8949.01	7392.18	5240.82	7627.54	6696.17	49.1166	44.508	34.504	22.9427	35.5185	33.9362
LOC724431	probable Dol-P-Man:Man(7)GlcNAc(2)-PP-Dol alpha-1,6-mannosyltransferase	724431	1608.84	0.323023	0.14893	2.16896	0.0300859	0.240184	1568.04	1977.7	1819.24	1467.52	1496.4	1324.11	7.09072	8.75598	7.56292	5.85818	6.1193	6.17113
LOC113219044	uncharacterized LOC113219044	113219044	89.9611	1.56384	0.72099	2.16902	0.0300815	0.240184	80.5313	185.293	137.643	14.0098	91.6383	30.6508	0.552477	1.30102	0.756471	0.102713	0.523522	0.232146
LOC724793	ubiquitin-conjugating enzyme E2-17 kDa	724793	24937	-0.193363	0.0891965	-2.16783	0.0301715	0.240485	23809.4	23348.8	22646	27480.1	25119.7	27217.9	255.966	239.602	231.962	266.533	252.372	289.675
LOC725122	uncharacterized LOC725122	725122	27206.5	-0.395406	0.182445	-2.16726	0.0302151	0.240641	24912.8	26014.6	19576.3	24974.7	33799.5	33961.1	164.574	162.764	114.427	143.675	206.058	222.47
LOC552530	NGFI-A-binding protein homolog	552530	1177.06	0.310599	0.143352	2.16669	0.0302585	0.240795	1367.48	1250.5	1291.07	1134.79	1086.72	931.784	6.28356	5.96776	6.15747	5.02271	5.47964	5.78919
Apid1	apidaecin 1	406140	2387.63	-1.50422	0.695128	-2.16394	0.0304687	0.242276	1456.53	1629.46	647.669	2876.67	6339.22	1376.22	25.5782	26.0484	9.92303	43.5972	84.207	20.6604
LOC726723	neogenin	726723	1256.06	0.420913	0.194557	2.16344	0.0305071	0.242389	1141.38	1431.13	1742.41	1079.92	1094.27	1047.23	1.07695	1.30279	1.6923	0.823532	0.790374	0.872521
LOC551505	ER membrane protein complex subunit 3	551505	4498.8	-0.213265	0.0986234	-2.16242	0.0305861	0.242824	4318.49	4272.92	3908.42	4715.45	4822.33	4955.21	67.8375	64.9032	56.6675	64.116	70.159	77.0937
LOC411639	cytoplasmic dynein 2 heavy chain 1	411639	48.18	1.19034	0.551045	2.16015	0.0307611	0.24402	51.1064	60.5229	89.6281	23.3496	21.562	42.9111	0.0534367	0.0463202	0.0851075	0.0124115	0	0.0324189
LOC100576986	uncharacterized LOC100576986	100576986	155.981	1.05602	0.489123	2.15901	0.0308491	0.244139	240.82	119.184	272.085	61.8764	152.012	89.9089	0.546728	0.255626	0.523316	0.118349	0.292741	0.193546
LOC107964885	uncharacterized LOC107964885	107964885	33.1592	-1.77069	0.820065	-2.1592	0.0308344	0.244139	22.4559	14.898	7.469	95.7334	22.6401	35.7592	0.373386	0.157287	0.0870692	0.97227	0.214397	0.444135
LOC100577211	uncharacterized LOC100577211	100577211	218.985	0.939472	0.435122	2.1591	0.0308425	0.244139	215.266	247.678	401.192	84.0586	155.246	210.469	2.08571	2.33861	3.12407	0.716462	1.44687	1.92031
LOC724618	cysteine-rich motor neuron 1 protein	724618	24492.5	0.23471	0.108767	2.15791	0.0309352	0.244533	25856	26703.6	26882	23408	20230.5	23874.9	71.3891	68.9044	66.4188	58.1258	53.7135	68.2299
LOC552749	sodium/potassium-transporting ATPase subunit beta-1-interacting protein	552749	644.02	0.624341	0.289349	2.15774	0.0309477	0.244533	485.511	898.533	960.301	489.174	521.799	508.803	1.4069	2.61387	2.79458	1.09157	1.2555	1.68618
LOC552129	uncharacterized LOC552129	552129	1516.3	0.241488	0.111938	2.15734	0.0309795	0.244592	1592.04	1730.02	1606.9	1382.3	1355.17	1431.39	4.53257	4.61356	4.10823	3.39099	3.4359	3.96182
LOC411875	transmembrane protein 62	411875	731.224	0.433635	0.201105	2.15626	0.031063	0.244865	725.556	932.053	863.204	728.508	602.657	535.367	4.92739	5.87257	5.11908	4.25119	3.61602	3.55927
LOC552576	activated Cdc42 kinase-like	552576	2237.53	0.248494	0.11523	2.1565	0.0310447	0.244865	2445.37	2520.55	2322.86	2029.08	2189.62	1917.72	1.87083	2.3864	2.04787	1.54406	1.36265	1.2646
LOC725942	glutathione S-transferase 1-1	725942	5617.26	0.518738	0.240778	2.15443	0.0312067	0.245805	7495.61	7727.38	4625.45	5308.53	3693.56	4853.04	124.796	120.664	68.8614	76.3676	56.3829	77.9381
LOC724455	T-complex protein 11-like protein 1	724455	2187.16	-0.258156	0.119922	-2.15271	0.0313417	0.246481	2046.58	1950.7	1978.22	2386.33	2578.81	2182.34	16.4714	14.7336	13.5655	15.8747	18.8072	17.5048
LOC100576945	uncharacterized LOC100576945	100576945	8303.61	-0.281627	0.130822	-2.15275	0.0313383	0.246481	8278.47	7475.98	6731.71	8513.26	8955.76	9866.49	103.477	95.6022	100.739	95.5003	117.23	125.311
LOC552618	uncharacterized LOC552618	552618	1759.66	-0.275327	0.127917	-2.15239	0.0313668	0.246485	1700.45	1523.32	1552.49	1821.27	2096.9	1863.57	5.29102	4.26743	4.20851	3.98004	4.98215	5.82703
LOC410393	alkaline phosphatase	410393	41.117	1.52089	0.706843	2.15166	0.0314238	0.246618	21.6815	79.1454	82.1591	28.0195	18.3277	17.3688	0.0391712	0.148034	0.0957027	0.0580261	0.052723	0
LOC410911	glycosaminoglycan xylosylkinase	410911	1784.36	-0.374273	0.173955	-2.15155	0.0314329	0.246618	1572.68	1338.95	1750.95	2301.1	1952.44	1790.01	14.6142	13.0963	17.3402	20.7501	17.7986	19.7164
LOC551572	uncharacterized LOC551572	551572	4075.45	-0.68991	0.320791	-2.15065	0.0315037	0.246787	3739.29	3906.06	1711.47	3782.64	5741.95	5571.29	45.7611	44.9903	19.2016	40.6736	63.4966	67.7362
LOC410178	disks large homolog 5	410178	603.816	0.477807	0.222155	2.15078	0.0314936	0.246787	542.812	804.489	761.839	549.883	457.114	506.76	0.962499	1.36337	1.21781	0.816771	0.723947	0.845451
LOC552649	elongation factor 1-beta'	552649	6882.41	-0.227361	0.105758	-2.14981	0.0315702	0.24702	6363.53	6149.13	6510.84	7952.87	6855.63	7462.44	168.758	153.325	156.48	181.742	166.123	196.254
LOC412245	acidic mammalian chitinase	412245	3515.04	0.275056	0.127954	2.14965	0.0315827	0.24702	3552.67	3831.57	4163.44	3469.75	3102.77	2970.06	37.5369	39.7296	40.2451	32.8833	31.0237	31.431
LOC724683	oxidative stress-responsive serine-rich protein 1	724683	3001.47	0.520724	0.242345	2.14869	0.0316589	0.247423	2674.57	4881.87	3055.89	2292.93	2503.34	2600.21	35.3883	58.8912	36.6472	27.6742	30.6089	34.914
LOC410516	cytosolic Fe-S cluster assembly factor NUBP2 homolog	410516	3318.1	-0.274855	0.128061	-2.14628	0.0318506	0.248533	3324.24	2757.05	2926.78	3489.6	3877.92	3533.01	44.265	36.0303	35.518	38.9289	46.5631	45.1264
LOC724443	lysophospholipid acyltransferase 5	724443	864.028	0.349001	0.1626	2.14638	0.0318429	0.248533	1020.58	953.469	929.358	860.433	667.343	752.987	10.2222	9.56087	8.87428	7.67468	6.39563	7.76775
LOC113218628	uncharacterized LOC113218628	113218628	155.51	1.25571	0.585331	2.14531	0.0319283	0.248753	93.6951	140.599	423.599	99.2358	81.9354	93.9957	0.802561	0.466024	3.62873	0.610185	0.927937	0.35054
LOC406097	integrin beta-PS	406097	10200.4	0.203505	0.0948509	2.14552	0.0319112	0.248753	11526.8	10856.9	10371.2	9183.4	9781.58	9482.33	51.6506	47.0625	41.6795	36.2798	39.9067	41.6982
LOC411849	probable sulfite oxidase, mitochondrial	411849	3133.79	0.257132	0.119929	2.14404	0.0320297	0.249156	3089.62	3699.35	3448.55	2901.19	2905.47	2758.57	22.5981	25.1138	21.96	18.058	18.4194	19.5811
LOC107966102	uncharacterized LOC107966102	107966102	3971.4	0.425587	0.198476	2.14428	0.0320106	0.249156	5359.98	3889.3	4408.85	3504.78	3944.76	2720.77	65.9584	54.1283	53.2409	38.4256	47.3692	35.8647
LOC551305	protein CLP1 homolog	551305	2772.55	-0.221782	0.10351	-2.14262	0.0321437	0.249849	2477.11	2519.62	2683.51	2994.59	3103.84	2856.65	24.6441	24.3432	25.6055	26.9782	29.7704	30.7038
LOC100576472	E3 ubiquitin-protein ligase Su(dx)	100576472	3378.86	0.331221	0.154658	2.14164	0.0322223	0.249878	3167.82	3913.51	4214.65	3193.06	2779.34	3004.8	11.9263	14.147	14.4936	10.4651	9.51681	11.0282
LOC411850	protein PAT1 homolog 1	411850	2300.07	0.259221	0.121026	2.14186	0.0322044	0.249878	2473.24	2516.82	2528.79	2090.96	1906.08	2284.5	8.59666	8.3596	8.02108	6.19419	6.02002	7.82338
LOC726007	polycomb protein Scm	726007	606.99	0.323858	0.151292	2.14062	0.0323046	0.250323	646.574	712.308	665.808	517.194	580.017	520.042	4.46477	4.81429	3.81774	3.0501	3.49666	3.66068
LOC113219156	uncharacterized LOC113219156	113219156	2187.42	0.547408	0.255786	2.1401	0.0323464	0.250453	1886.29	3338.07	2568.27	2141.16	1425.25	1765.48	0.425934	0.0822451	0.273231	0.415935	0.851858	0.510897
Usp	ultraspiracle	409227	5813.37	0.325349	0.152146	2.1384	0.0324846	0.250942	5578.34	6255.28	7566.1	4852.05	5405.58	5222.89	24.0404	28.7171	31.3056	17.6066	19.0412	17.9854
LOC100576902	uncharacterized LOC100576902	100576902	208.178	0.881417	0.41225	2.13806	0.0325116	0.250958	170.355	377.104	262.482	121.418	116.435	201.273	0.738521	1.27467	0.815858	0.430214	0.418165	0.778024
LOC552289	RNA-binding protein 39	552289	6665.88	0.221113	0.103441	2.13757	0.0325513	0.25107	6668.62	7597.96	7260.94	6395.46	6092.33	5979.97	44.2545	49.3949	43.4719	37.2304	35.2456	36.4715
LOC113219022	small nucleolar RNA U6-53/MBII-28	113219022	2818.68	-0.304237	0.142495	-2.13507	0.0327555	0.252451	2766.72	2246.8	2553.33	3435.89	2946.44	2962.91	0	0	0	0	0	0
LOC412599	arfaptin-2	412599	337.349	0.513333	0.240772	2.13203	0.0330048	0.254177	443.697	378.036	368.115	314.052	217.776	302.421	5.09494	3.92728	3.76842	2.81966	2.23279	3.3943
LOC724803	neprilysin-4	724803	8408.68	-0.333517	0.156455	-2.13171	0.033031	0.254184	6385.98	7975.99	7961.96	10348.5	8145.03	9634.56	1.89934	1.87958	2.37438	3.04964	2.42248	2.51337
LOC113218571	hydrocephalus-inducing protein-like	113218571	18.1992	-1.71768	0.806212	-2.13055	0.033126	0.254524	8.51774	8.3801	8.53601	32.6894	38.8115	12.2603	0.0515923	0.0596894	0.0219759	0.134269	0.21741	0.04497
LOC551610	deoxyribodipyrimidine photo-lyase	551610	1406.04	-0.308265	0.144671	-2.1308	0.0331056	0.254524	1430.98	1137.83	1199.31	1560.92	1566.48	1540.71	11.8103	9.06244	9.29306	10.2582	11.9631	12.2548
LOC411582	tyrosine-protein kinase Fer	411582	4278.16	0.387683	0.182018	2.12991	0.0331788	0.25454	4155.88	4351.13	6042.43	3979.94	3534.01	3605.55	19.7027	21.0465	27.2416	16.2524	14.8176	16.4551
LOC551047	tetratricopeptide repeat protein 1	551047	3981.2	-0.234382	0.110034	-2.13008	0.0331648	0.25454	3655.66	3912.57	3406.93	4257.8	4149.6	4504.64	40.8417	44.383	36.4535	43.6566	44.4402	56.2336
LOC725510	arrestin domain-containing protein 17	725510	402.198	1.33832	0.628759	2.12851	0.0332951	0.254847	298.121	1144.35	287.023	137.763	143.387	402.547	1.38518	5.85628	0.764825	0.4228	0.410764	0.871993
LOC102655814	ras-related and estrogen-regulated growth inhibitor	102655814	3412.42	-0.416276	0.195542	-2.12883	0.0332683	0.254847	3321.92	2547.55	2900.11	4822.86	3534.01	3348.09	34.9215	25.9095	26.9793	42.7825	32.9583	34.2828
LOC552442	trafficking protein particle complex subunit 4	552442	921.085	0.271985	0.127768	2.12874	0.0332761	0.254847	1031.42	1037.27	953.899	840.586	801.027	862.309	15.4546	13.99	11.912	10.5863	10.2852	12.3046
LOC412279	uncharacterized LOC412279	412279	329.482	-0.427151	0.200745	-2.12783	0.0333509	0.25508	271.019	291.441	280.621	429.633	336.367	367.809	1.1087	1.26052	1.15144	1.56473	1.394	1.55573
CSP1	chemosensory protein 1	725382	251.243	-1.59137	0.748134	-2.12711	0.0334106	0.255342	151.771	111.735	112.035	105.073	899.134	127.712	12.9722	3.27046	2.71868	3.6247	45.9628	5.74386
LOC551906	another transcription unit protein	551906	13649.7	-0.238073	0.112002	-2.12561	0.0335359	0.255909	12370.9	13200.5	12007	13468.1	14988.8	15862.8	12.6433	11.8384	11.3436	14.1836	13.4	15.1419
LOC102654750	uncharacterized LOC102654750	102654750	812.616	0.50666	0.238333	2.12585	0.033516	0.255909	994.252	1113.62	753.303	626.937	822.589	564.996	6.67623	6.36151	4.15064	3.31019	4.31861	3.08283
LOC102655272	NHP2-like protein 1	102655272	1869.6	-0.385212	0.181268	-2.1251	0.0335786	0.25604	1965.27	1328.71	1569.56	2062.94	2206.87	2084.25	55.3956	36.4759	39.5701	50.2743	56.5645	58.1237
LOC551679	transmembrane protein 47	551679	719.904	0.378342	0.178121	2.12408	0.0336639	0.2563	754.207	853.839	833.328	626.937	713.701	537.41	10.7561	10.091	9.98751	6.76524	9.31679	6.74056
LOC408507	WD repeat-containing protein 44	408507	2612.48	0.213017	0.100324	2.12329	0.0337292	0.256595	2694.7	2814.78	2906.51	2373.49	2376.13	2509.28	8.49295	8.67658	8.34068	6.66656	6.6719	7.42697
CSP3	chemosensory protein 3	406094	2.5955e+06	-0.399288	0.188104	-2.1227	0.0337793	0.256595	2.11611e+06	2.02141e+06	2.57829e+06	3.6721e+06	2.58536e+06	2.59973e+06	89184	82320.2	101128	133084	99042.1	108736
LOC411282	basic-leucine zipper transcription factor A	411282	1236.74	0.411003	0.193597	2.12298	0.0337552	0.256595	1618.37	1516.8	1099.01	1126.62	1013.41	1046.21	3.55423	3.14528	2.19836	2.24353	2.16596	2.34824
LOC726367	glycerate kinase-like	726367	22.8061	1.58105	0.745058	2.12206	0.033833	0.256595	27.8762	44.6939	29.876	16.3447	12.9372	5.10846	0.194509	0.292598	0.174074	0.10125	0.0983493	0.0254339
LOC408982	calcineurin B homologous protein 1	408982	2105.72	-0.216782	0.102141	-2.12238	0.0338055	0.256595	2001.67	1893.9	1947.28	2358.31	2207.94	2225.25	26.3639	23.6927	23.5537	26.668	26.3859	28.0222
LOC408304	nuclear migration protein nudC	408304	7274.4	-0.230524	0.108646	-2.12178	0.0338561	0.256595	7210.65	6677.08	6193.94	8214.39	7663.12	7687.22	86.4898	76.6173	68.392	81.9845	81.7601	89.4225
LOC102654605	uncharacterized LOC102654605	102654605	206.765	1.05005	0.495026	2.12121	0.0339043	0.256766	177.324	203.916	455.609	105.073	201.604	97.0608	1.08528	1.17915	2.83305	0.585273	1.20368	0.558714
LOC100576547	glucose dehydrogenase [FAD, quinone]	100576547	9835.92	-0.236586	0.11157	-2.12053	0.0339618	0.257007	8967.63	9098.92	9027.89	9730.95	10486.7	11703.5	59.1977	58.2689	52.0249	54.5053	63.6732	77.7588
LOC410103	partner of Y14 and mago	410103	2738.23	-0.218287	0.103014	-2.119	0.0340906	0.257046	2577.78	2553.14	2462.64	3121.84	2824.62	2889.35	42.9657	40.3025	36.4689	44.3116	42.1345	46.6491
LOC727483	protein stunted	727483	3478.37	0.227904	0.107553	2.11899	0.0340911	0.257046	3780.33	3830.64	3647.01	3002.76	3166.37	3443.1	215.087	216.487	196.327	151.958	170.009	205.541
LOC409332	ubiquitin carboxyl-terminal hydrolase 7	409332	6905.76	0.20934	0.0987944	2.11895	0.0340951	0.257046	7179.68	7220.85	7817.91	6596.26	6071.85	6548.03	15.9871	14.9268	15.5827	12.5723	12.163	14.1675
LOC107965194	uncharacterized LOC107965194	107965194	118.277	0.839964	0.396182	2.12015	0.0339935	0.257046	134.735	111.735	209.132	82.8911	68.9983	102.169	0.260076	0.211428	0.383257	0.154105	0.118922	0.163027
LOC725818	uncharacterized LOC725818	725818	560.612	0.44601	0.210444	2.11937	0.0340591	0.257046	689.163	647.13	602.855	513.691	536.893	373.939	12.8277	11.3032	10.9259	9.43558	9.98802	7.94686
LOC408882	septin-2	408882	3734.15	-0.261124	0.12339	-2.11625	0.0343234	0.258573	3588.29	3601.58	3000.41	3977.6	4162.54	4074.51	35.297	33.733	26.3659	33.4858	37.005	38.4717
LOC113218583	uncharacterized LOC113218583	113218583	3037.69	0.66832	0.316148	2.11394	0.0345201	0.259338	2507.31	3085.74	5594.28	2646.68	2614.39	1777.75	22.5657	23.8078	45.9853	20.8333	22.541	17.5015
LOC100578084	uncharacterized LOC100578084	100578084	59.4657	-1.5621	0.738984	-2.11385	0.0345284	0.259338	21.6815	56.7984	11.737	47.8667	137.997	80.7137	0.415442	1.01694	0.118721	0.480984	1.98147	1.2086
LOC410663	selenoprotein F	410663	7755.96	0.446882	0.211379	2.11413	0.0345045	0.259338	6536.98	11175.3	9131.39	6093.08	7171.51	6427.47	33.9994	28.2442	34.6333	34.726	37.7204	38.2418
LOC551728	F-box/LRR-repeat protein 20	551728	1418.1	0.274497	0.129846	2.11401	0.0345141	0.259338	1420.91	1576.39	1661.32	1270.22	1347.62	1232.16	6.76959	7.33963	7.20148	5.16904	5.74582	5.3771
LOC102654146	antifreeze protein Maxi	102654146	38.3685	2.13836	1.01178	2.11347	0.0345609	0.259388	15.4868	143.393	28.809	4.66992	20.4839	17.3688	0.176681	1.76037	0.362671	0.0460087	0.17854	0.184951
LOC410624	serine proteinase stubble	410624	5422.4	0.59214	0.280247	2.11292	0.0346073	0.259542	5491.62	6623.07	7445.53	2596.48	5493.99	4883.69	13.7665	15.3869	17.7995	5.61118	12.311	12.2577
LOC100578866	uncharacterized LOC100578866	100578866	170.537	0.715825	0.33892	2.11207	0.0346801	0.259893	195.134	157.36	283.822	115.581	147.699	123.625	0.836668	0.628387	1.02952	0.4012	0.551972	0.505657
LOC552238	cilia- and flagella-associated protein 52	552238	81.029	-1.56175	0.739722	-2.11126	0.0347499	0.259993	28.6506	46.5561	48.015	54.8716	49.5925	258.488	0	0.0482904	0.0800475	0.10861	0.0263718	1.43237
LOC552780	ribonuclease P/MRP protein subunit POP5	552780	396.631	0.380533	0.180261	2.11101	0.0347711	0.259993	467.701	407.831	470.547	319.89	364.397	349.419	10.3434	9.77882	10.6079	6.41616	8.18612	8.97497
LOC408271	rap1 GTPase-activating protein 1	408271	25180.2	-0.244327	0.115734	-2.11111	0.0347628	0.259993	22618.5	20988.4	25553.6	26764.5	26816.6	28339.7	8.21183	9.42788	12.0126	4.51433	4.72797	5.11973
LOC409714	serine-rich adhesin for platelets	409714	4872.68	-0.306763	0.145359	-2.11038	0.034826	0.260015	3740.06	4961.02	4369.37	5453.3	5622.28	5090.07	2.11019	3.12416	3.03651	2.31407	2.67268	2.88792
LOC102656729	uncharacterized LOC102656729	102656729	73.0724	0.924552	0.438289	2.10946	0.0349051	0.260412	82.8544	113.597	90.6951	60.709	32.3429	58.2365	0.764687	0.966068	0.638166	0.594128	0.293382	0.522481
LOC552243	mucin-5AC	552243	11110.3	-0.43668	0.207054	-2.10902	0.0349432	0.260502	8286.21	12313.2	7725.09	14166.2	11715.7	12455.5	12.75	21.457	10.4318	19.6543	14.649	18.1273
LOC726583	DNA polymerase eta	726583	849.065	-0.303165	0.143803	-2.1082	0.0350138	0.260835	791.375	718.826	770.375	918.807	874.337	1020.67	4.86748	4.18893	4.29929	4.86703	4.77166	6.34168
LOC113219202	uncharacterized LOC113219202	113219202	26.2178	1.29151	0.614336	2.10229	0.0355279	0.264272	28.6506	37.2449	45.881	12.8423	19.4058	13.282	0.0768905	0.111133	0.098093	0.037511	0.0607743	0.050249
LOC100577679	origin recognition complex subunit 2	100577679	446.898	-0.497395	0.236631	-2.10199	0.0355546	0.264274	455.312	301.684	354.244	495.012	591.876	483.261	3.27551	2.07242	2.17551	3.04053	3.84496	3.56044
LOC100576403	uncharacterized LOC100576403	100576403	88.5457	1.3846	0.659053	2.1009	0.03565	0.264529	125.443	91.25	167.519	59.5415	12.9372	74.5836	1.86328	2.02447	3.8383	0.572139	0.413935	1.56029
LOC409404	aminoacyl tRNA synthetase complex-interacting multifunctional protein 2-like	409404	5018.88	-0.217975	0.103773	-2.10049	0.0356857	0.264529	4477.23	4863.25	4580.63	5744	5318.26	5129.92	74.207	77.9872	68.936	80.2346	80.7676	84.0949
LOC724133	peptide chain release factor 1	724133	500.324	-0.375622	0.178798	-2.10082	0.035657	0.264529	441.374	432.041	433.202	593.08	485.144	617.102	3.30632	2.96166	3.14146	3.76267	3.38493	4.41468
LOC411622	uncharacterized LOC411622	411622	48.865	2.29318	1.09179	2.10039	0.0356943	0.264529	15.4868	206.709	21.34	8.17236	31.2648	10.2169	0.4122	7.44053	0.40258	0.268942	0.90836	0.405736
LOC113218596	uncharacterized LOC113218596	113218596	184.914	1.01235	0.482089	2.09993	0.0357354	0.264637	181.97	167.602	392.656	75.8862	120.747	170.623	0.385151	0.344028	0.751307	0.144226	0.199294	0.350798
LOC100577026	mitochondrial amidoxime-reducing component 1	100577026	8107.13	-0.388598	0.185092	-2.09949	0.0357738	0.264726	7265.63	5397.71	8402.63	9510.29	8591.36	9475.18	59.0196	39.1848	58.869	68.3722	64.8706	79.2004
LOC726803	uncharacterized LOC726803	726803	4561.89	-0.676448	0.322243	-2.09919	0.0358004	0.264728	4207.76	4380	1946.21	5064.53	7242.66	4530.18	140.071	140.459	58.3208	148.431	225.733	155.426
LOC102653840	uncharacterized LOC102653840	102653840	96.9221	-0.986788	0.470574	-2.09699	0.0359947	0.264992	96.0181	40.0382	58.685	96.9008	131.528	158.362	0.296056	0.130879	0.177703	0.260534	0.396445	0.455221
LOC410454	putative sodium-dependent multivitamin transporter	410454	264.682	0.790559	0.376838	2.09787	0.0359164	0.264992	288.829	448.801	268.884	122.585	258.744	200.252	1.81788	2.65459	1.24055	0.66603	1.47258	1.06258
LOC727574	transcription initiation factor TFIID subunit 3-like	727574	2194.87	-0.29928	0.142711	-2.0971	0.035985	0.264992	1920.36	1942.32	2041.17	2715.56	2445.13	2104.69	7.17557	6.57772	6.73216	9.12293	8.98137	8.15594
LOC551760	deaminated glutathione amidase	551760	4150.74	-0.245715	0.117155	-2.09734	0.0359631	0.264992	3956.1	3912.57	3524.3	4853.21	4440.69	4217.55	21.8026	20.8463	16.7227	22.7545	22.5241	23.1332
LOC725366	anosmin-1	725366	5496.82	0.382046	0.182176	2.09712	0.0359826	0.264992	7172.71	5437.75	6049.89	5607.41	3986.81	4726.35	52.3144	37.0902	40.3144	35.1951	26.09	34.0272
LOC725984	uncharacterized LOC725984	725984	211.082	1.25839	0.599672	2.09846	0.0358647	0.264992	148.673	534.464	210.199	56.039	183.277	133.842	0.765051	3.12894	1.27335	0.115761	0.584789	0.56994
LOC414032	tubulin polyglutamylase TTLL5	414032	6508.25	0.342006	0.16319	2.09575	0.0361042	0.265603	6916.4	6371.67	8541.34	5085.54	5856.23	6278.3	8.12758	6.31903	13.5956	1.63854	2.72886	6.19803
LOC410109	ubiquitin carboxyl-terminal hydrolase 34	410109	1093.5	0.363473	0.173573	2.09406	0.0362542	0.265999	1067.04	1242.12	1382.83	1072.91	877.572	918.502	1.43612	1.58435	1.72347	1.27359	1.11019	1.21312
LOC100576110	zinc finger protein GLI4	100576110	1992.32	0.263915	0.126	2.09456	0.0362101	0.265999	2177.44	1964.67	2380.48	1822.44	1801.5	1807.37	8.11532	6.60286	7.23926	5.17776	6.53843	6.33636
LOC725018	phosphomevalonate kinase	725018	412.88	-0.454893	0.217241	-2.09395	0.0362641	0.265999	422.79	326.824	294.492	462.322	473.285	497.564	12.7443	9.60589	8.04044	12.2331	12.8917	15.3035
LOC102654161	uncharacterized LOC102654161	102654161	51.9246	0.915178	0.437001	2.09423	0.0362398	0.265999	75.111	54.9362	73.623	30.3545	36.6553	40.8677	0.448911	0.324872	0.431256	0.237287	0.141808	0.293607
LOC726053	EH domain-binding protein 1	726053	589.291	0.511774	0.244478	2.09333	0.0363197	0.266	531.197	712.308	835.462	417.958	561.689	477.13	2.10109	2.76561	3.11058	1.4981	2.181	1.81347
LOC409422	uncharacterized LOC409422	409422	5811.86	-0.474463	0.226684	-2.09306	0.0363439	0.266	3992.5	5276.67	5325.4	6856.61	8437.19	4982.79	19.3266	25.8431	24.7771	29.2731	35.6787	23.7579
LOC551954	26S proteasome non-ATPase regulatory subunit 10	551954	909.633	-0.330288	0.157799	-2.09309	0.0363408	0.266	862.615	769.107	785.313	1146.47	958.429	935.87	19.0556	16.4475	15.4084	21.9299	19.1234	21.2352
LOC724710	transmembrane protein 59-like	724710	1115.09	0.363916	0.17402	2.09123	0.0365073	0.266418	1209.52	1422.75	1132.09	1114.94	913.149	898.068	15.8947	17.9187	13.7026	12.8359	11.0085	11.6847
LOC113218841	uncharacterized LOC113218841	113218841	517.256	-0.451415	0.215842	-2.09142	0.0364905	0.266418	387.17	521.428	402.259	666.631	608.047	517.998	3.70472	4.12951	3.41669	6.56284	6.80416	5.98384
LOC725486	2',5'-phosphodiesterase 12	725486	1776.09	-0.371838	0.177749	-2.09192	0.0364455	0.266418	1777.11	1622.01	1245.19	1929.84	1927.64	2154.75	13.7705	11.8872	7.94966	12.6423	13.9466	16.2053
LOC100576930	uncharacterized LOC100576930	100576930	1613.38	-0.315353	0.150843	-2.0906	0.0365638	0.266443	1592.04	1348.26	1372.16	1872.64	1581.57	1913.63	40.3343	33.8976	33.4241	43.1603	37.2449	48.2659
LOC726358	huntingtin	726358	6762.96	0.250234	0.119688	2.09072	0.0365534	0.266443	6699.59	7255.3	8090	6486.52	6123.6	5922.75	10.8729	11.1306	11.7178	9.14371	9.01261	9.46665
LOC409228	scavenger receptor class B member 1	409228	64788.5	-0.437959	0.20958	-2.0897	0.0366448	0.266839	72527	50571.1	41988.6	77293	71352.8	74998.4	291.412	197.367	153.966	268.11	260.589	294.972
LOC550799	DAZ-associated protein 2	550799	6979.18	0.26074	0.124803	2.08921	0.0366889	0.266966	7756.56	6786.95	8280.99	6730.52	6023.33	6296.69	32.1145	33.4581	29.7041	30.3075	25.2576	29.2563
LOC411958	TWiK family of potassium channels protein 18	411958	2060.31	0.484838	0.232114	2.0888	0.0367262	0.267044	2712.51	2658.35	1838.44	1870.3	1319.59	1962.67	11.3322	10.9848	6.88352	6.62402	4.87406	7.74701
LOC412513	uncharacterized LOC412513	412513	6071.76	-0.244518	0.117149	-2.08723	0.0368673	0.267102	6130.45	5053.2	5490.79	6555.4	6452.42	6748.28	39.1282	30.0739	25.8526	34.3712	37.1645	42.7471
LOC412448	zinc transporter ZIP1	412448	685.38	-0.620906	0.297417	-2.08766	0.0368282	0.267102	564.494	450.663	604.989	1170.98	724.482	596.668	6.01117	4.26409	5.24056	10.5963	6.39907	4.77209
LOC102654892	uncharacterized LOC102654892	102654892	71.04	1.81095	0.86759	2.08734	0.0368578	0.267102	33.2966	205.778	92.8291	10.5073	20.4839	63.3449	0.300319	1.53659	0.791289	0.0794897	0.257357	0.372735
LOC551198	serine/threonine-protein kinase STK11	551198	344.675	0.455639	0.218272	2.08748	0.0368449	0.267102	454.538	397.589	343.574	258.013	298.633	315.703	2.37372	2.38782	1.6469	1.51141	1.23726	1.79763
Crzr	corazonin receptor	409042	383.792	-1.04767	0.50241	-2.08529	0.0370433	0.267796	308.962	315.65	125.906	228.826	591.876	731.532	2.09659	2.07311	0.834803	1.38821	3.86941	5.15452
LOC411629	zinc finger protein ubi-d4 A	411629	3748.5	-0.237539	0.113911	-2.08531	0.0370407	0.267796	3547.25	3166.75	3607.53	4293.99	3988.96	3886.52	12.8275	11.9907	11.2436	14.2468	13.4574	14.7943
LOC551425	UDP-N-acetylglucosamine--peptide N-acetylglucosaminyltransferase 110 kDa subunit	551425	10173.9	0.377983	0.18124	2.08554	0.0370206	0.267796	9799.27	10401.6	14297.8	8115.15	8794.05	9635.58	31.329	32.1869	42.1869	21.8108	25.3075	29.2601
LOC413404	ribosome biogenesis protein WDR12 homolog	413404	1726.37	-0.304826	0.146242	-2.08439	0.0371251	0.268001	1739.17	1351.06	1542.88	1973.04	1921.17	1830.87	16.7035	12.002	13.0387	17.4573	17.8734	17.4593
LOC726332	CREB-binding protein	726332	475.4	0.876491	0.420901	2.08242	0.0373045	0.268676	401.882	1007.47	437.47	226.491	381.647	397.438	3.67193	9.42196	3.57933	1.46053	2.76811	3.48806
LOC412574	PR domain zinc finger protein 10	412574	1537.65	0.235462	0.113084	2.08218	0.0373258	0.268676	1605.98	1609.91	1773.36	1414.99	1420.93	1400.74	5.81511	5.54791	5.97331	4.51518	4.90649	5.08024
LOC113219390	uncharacterized LOC113219390	113219390	140.433	0.809826	0.388929	2.0822	0.0373244	0.268676	114.602	200.191	221.936	109.743	116.435	79.692	0.606707	0.616943	1.27614	0.692119	0.47809	0.39765
LOC102656808	uncharacterized LOC102656808	102656808	22.7164	-1.57585	0.756702	-2.08252	0.0372949	0.268676	6.19472	19.5536	8.53601	42.0293	33.421	26.564	0.0813825	0.0266674	0.0241982	0.106358	0.117885	0.133164
LOC409230	arf-GAP with coiled-coil, ANK repeat and PH domain-containing protein 2	409230	773.596	0.417012	0.200445	2.08043	0.0374857	0.269433	765.048	842.665	1046.73	661.961	742.81	582.365	2.22918	2.31751	2.73076	1.6703	1.95831	1.65541
LOC412623	transmembrane protein 94	412623	913.537	0.29391	0.141298	2.08008	0.0375186	0.269433	966.376	1067.07	985.909	753.025	831.214	877.634	1.00985	1.20282	1.29818	0.747288	0.983155	0.917857
LOC552099	homeotic protein empty spiracles	552099	305.83	-0.707999	0.340407	-2.07986	0.0375384	0.269433	243.143	265.37	187.792	499.681	398.896	240.098	0.656668	0.682391	0.451597	1.18055	0.989175	0.655702
LOC100578718	protein distal antenna	100578718	109.106	1.15944	0.557413	2.08003	0.0375226	0.269433	92.9208	197.398	162.184	28.0195	86.2478	87.8656	0.571084	1.20479	0.944317	0.152994	0.509631	0.549013
LOC412503	mitochondrial dicarboxylate carrier	412503	11118.2	-0.185656	0.0893074	-2.07885	0.0376316	0.269908	10282.5	10101.7	10827.9	12006.4	11345.9	12144.9	20.3677	15.9277	20.7372	18.1775	19.8399	23.4045
LOC102654812	uncharacterized LOC102654812	102654812	127.323	-0.804615	0.387337	-2.0773	0.0377739	0.270156	91.3721	94.0433	92.8291	105.073	225.322	155.297	0.579587	0.568967	0.583573	0.548508	1.26558	1.03336
LOC412968	putative epidermal cell surface receptor	412968	18764.1	-0.448208	0.21584	-2.07658	0.0378404	0.270246	14237.8	14784.4	18595.7	28263.5	18254.4	18448.7	41.6136	40.9215	49.1866	71.3249	48.3125	53.1614
LOC102653977	uncharacterized LOC102653977	102653977	1053.49	0.832105	0.400684	2.07671	0.037828	0.270246	727.88	1027.03	2292.98	800.891	837.682	634.471	4.52574	5.94597	12.2911	4.08473	4.72066	3.30998
LOC411355	von Willebrand factor A domain-containing protein 8	411355	29277.8	-0.79923	0.385152	-2.0751	0.0379768	0.271028	34245.2	15968.7	13893.4	32235.3	24510.6	54813.8	47.048	26.3411	20.0934	39.9105	36.0336	69.6131
LOC107964868	uncharacterized LOC107964868	107964868	768.677	0.545157	0.262862	2.07393	0.0380861	0.271614	689.163	1227.22	820.524	621.099	555.22	698.838	2.93462	5.13352	2.82468	2.27596	2.12023	2.81591
LOC409282	bromodomain-containing protein DDB_G0280777	409282	3319.02	0.207455	0.100061	2.07327	0.0381468	0.271732	3461.3	3555.95	3654.48	3258.44	3005.74	2978.23	8.24742	8.46398	8.0771	6.73711	6.61777	7.21718
LOC494509	malvolio	494509	3202.81	-0.355757	0.171601	-2.07317	0.0381569	0.271732	2798.46	3011.25	2619.49	3732.43	4148.52	2906.72	22.2394	22.9653	18.8983	26.1304	29.7585	23.0983
LOC102656814	uncharacterized LOC102656814	102656814	639.941	0.632093	0.305009	2.07237	0.0382307	0.272065	967.151	880.841	485.485	415.623	515.331	575.213	17.8297	16.8024	9.78868	8.11099	9.84787	10.4894
LOC411472	dynamin-1-like protein	411472	3243.82	-0.229688	0.110871	-2.07166	0.0382974	0.272346	3191.83	2785.92	2980.13	3498.94	3365.82	3640.29	16.757	14.1726	13.8791	16.3167	16.5226	19.3399
LOC551041	glycerol kinase	551041	5087.17	-0.232417	0.112205	-2.07136	0.0383252	0.272351	4880.66	4583.91	4569.96	5452.13	5077.84	5958.51	44.9729	40.0338	37.2286	43.7863	42.6771	54.6231
LOC410897	coiled-coil domain-containing protein 124	410897	1657.36	-0.251251	0.121355	-2.07038	0.0384165	0.272613	1447.24	1654.6	1438.32	1824.77	1781.02	1798.18	24.0526	24.9574	21.7565	24.4158	25.4435	28.49
LOC552196	ras-related protein Rab-43	552196	10188.9	-0.197167	0.095232	-2.07039	0.0384157	0.272613	9919.29	9584.04	8976.68	11025.7	10434.9	11192.6	18.0359	15.2186	17.468	17.5737	19.1208	18.5945
LOC102656275	uncharacterized LOC102656275	102656275	50.6607	0.966906	0.467347	2.06893	0.0385529	0.273388	78.9827	64.2474	57.618	40.8618	37.7334	24.5206	0.455638	0.295226	0.326128	0.166018	0.207357	0.119151
LOC726887	ras-related protein Rab-32	726887	222.124	1.19506	0.577798	2.0683	0.0386116	0.273478	126.217	473.01	328.636	64.2114	203.761	136.907	1.0026	3.70362	2.92372	0.49939	1.86302	1.08566
LOC102655652	uncharacterized LOC102655652	102655652	35.7199	1.48283	0.717432	2.06685	0.0387479	0.273478	20.9072	77.2831	59.752	15.1772	25.8744	15.3254	0.0976918	0.41231	0.319599	0.0423601	0.144093	0.0851471
LOC100577231	uncharacterized LOC100577231	100577231	113.807	0.744889	0.360416	2.06675	0.0387577	0.273478	144.027	139.668	144.045	87.561	58.2173	109.321	0.552142	0.466493	0.473453	0.262345	0.228137	0.388504
LOC725963	dynein regulatory complex protein 9	725963	154.837	-1.07449	0.51983	-2.06701	0.0387335	0.273478	154.868	105.217	38.412	219.486	240.416	170.623	0.758937	0.51342	0.122008	1.06189	1.01721	0.997172
LOC727079	fibroblast growth factor receptor substrate 2	727079	465.341	0.42932	0.207657	2.06745	0.0386918	0.273478	646.574	482.321	472.681	389.938	401.052	399.482	6.06552	4.08874	4.0955	2.98143	3.42827	3.91648
LOC100576355	uncharacterized LOC100576355	100576355	1932.92	-0.435199	0.210485	-2.0676	0.0386778	0.273478	1978.44	1543.8	1407.37	2590.64	1790.72	2286.55	11.0255	8.32434	7.17634	12.5035	9.01723	12.9987
LOC408347	putative uncharacterized protein DDB_G0277255	408347	1380.48	0.365449	0.176726	2.06788	0.0386513	0.273478	1427.11	1728.16	1507.67	1412.65	1043.6	1163.71	8.89303	9.39429	7.80433	7.00293	6.28452	7.29375
LOC550955	putative gamma-glutamylcyclotransferase CG2811	550955	8595.34	-0.249386	0.120729	-2.06567	0.03886	0.273822	7825.48	8506.73	7230	9806.83	8563.33	9639.67	99.5701	99.946	84.5633	104.249	105.255	115.011
LOC725102	protein dpy-30 homolog	725102	1256.01	-0.436251	0.211302	-2.06459	0.0389619	0.274039	929.208	1104.31	1169.43	1574.93	1652.72	1105.47	53.2017	52.6205	54.8315	70.1727	67.7648	58.9911
LOC102655560	uncharacterized LOC102655560	102655560	63.1807	-1.07269	0.519594	-2.06448	0.0389727	0.274039	48.0091	25.1403	49.082	54.8716	91.6383	110.343	0.080287	0.0360879	0.0738916	0.0812237	0.141053	0.174856
LOC413650	nuclear RNA export factor 1	413650	2673.93	0.260603	0.12632	2.06304	0.0391086	0.274609	2728.77	2779.4	3237.28	2343.13	2554.01	2400.98	8.83055	8.48775	9.32139	6.39617	7.58558	7.505
LOC552144	major facilitator superfamily domain-containing protein 8	552144	1007.47	0.312232	0.1515	2.06094	0.0393087	0.275436	977.217	1156.45	1215.31	928.147	862.478	905.22	9.43823	10.8297	10.4949	8.08834	7.83753	8.41356
LOC726500	eukaryotic translation initiation factor 2 subunit 1	726500	2746.11	-0.239391	0.116186	-2.06042	0.0393587	0.275593	2529.77	2369.71	2656.83	3184.89	2922.72	2812.72	29.9715	26.4379	28.6529	33.0302	31.7539	33.2346
LOC408903	uncharacterized LOC408903	408903	4994.09	0.219976	0.106778	2.06012	0.0393871	0.275599	5696.82	5252.46	5171.75	4765.65	4767.35	4310.52	43.9615	34.8273	33.5118	30.3366	32.123	31.2673
LOC551913	protein CREG1	551913	14266.4	-0.338897	0.164557	-2.05945	0.0394508	0.275661	12403.4	14816	10575	16761.5	16817.3	14225	216.115	250.512	162.699	255.178	268.696	248.8
LOC551259	titin	551259	292968	0.292477	0.142015	2.05947	0.039449	0.275661	328888	347574	291227	269367	227984	292767	65.2637	69.9352	51.501	43.7965	38.1043	53.0669
LOC412745	blastoderm-specific protein 25D	412745	926.071	0.514937	0.250095	2.05897	0.0394974	0.275794	779.76	1056.82	1432.98	798.556	736.341	751.966	3.23247	4.13008	5.24716	2.7714	2.70728	2.83982
LOC552110	uncharacterized LOC552110	552110	22703.1	-0.352091	0.171062	-2.05827	0.0395646	0.276071	23883.7	20097.3	15856.7	24602.3	25349.3	26429.1	70.6747	55.3735	34.1105	52.7778	63.149	70.8436
LOC552170	ubiquitin-like protein 7	552170	2025.26	-0.288758	0.140423	-2.05634	0.0397494	0.277168	1996.25	1655.53	1817.1	2430.69	2064.56	2187.44	25.1926	19.4692	20.3313	26.5862	23.728	26.6736
LOC410410	ATP-dependent DNA helicase PIF1	410410	320.669	-0.599677	0.291957	-2.05399	0.0399764	0.278557	281.86	224.4	258.214	506.686	370.866	281.987	2.24307	1.69822	1.79628	3.41024	2.62323	2.13824
LOC724859	myosin 9	724859	673.53	0.534046	0.260282	2.0518	0.040189	0.279844	569.14	872.461	949.631	463.49	551.986	634.471	0.975458	1.45883	1.46457	0.680037	0.776187	1.00704
LOC551848	protocadherin-like wing polarity protein stan	551848	2071.38	0.353283	0.172336	2.04997	0.0403671	0.280544	2329.21	2620.18	2021.97	1593.61	1783.17	2080.17	2.91524	3.02973	2.16588	1.62893	1.9696	2.07876
LOC552572	eukaryotic translation initiation factor 5A	552572	11298.7	-0.211298	0.103071	-2.05002	0.0403626	0.280544	10348.3	9859.65	11211	12731.4	11721.1	11921.1	159.737	143.555	156.188	167.54	163.406	178.968
LOC727000	protein sprint	727000	2303.85	0.626872	0.305805	2.04991	0.0403735	0.280544	1931.98	2495.41	3962.84	2291.76	1785.33	1355.79	4.44303	5.67891	8.28128	4.51376	3.76784	3.03958
LOC412711	kinesin 2B	412711	432.624	0.564404	0.275458	2.04896	0.0404658	0.280797	594.693	539.12	413.996	426.13	363.319	258.488	4.02035	3.47025	2.52519	2.28251	2.21729	1.47262
LOC107964958	uncharacterized PE-PGRS family protein PE_PGRS20-like	107964958	209.2	0.943193	0.460274	2.0492	0.0404428	0.280797	140.156	374.311	311.564	105.073	199.448	124.646	0.402734	1.26514	0.872995	0.265605	0.491607	0.382358
LOC113219223	uncharacterized LOC113219223	113219223	161.612	-0.877596	0.42879	-2.04668	0.0406895	0.281958	126.217	156.428	58.685	238.166	173.574	216.599	1.8216	2.66892	1.23253	4.78622	3.16499	4.81139
LOC552118	pyrimidodiazepine synthase	552118	3249.47	-0.375298	0.183531	-2.04488	0.0408665	0.282905	3354.44	2906.96	2224.7	3711.42	3891.93	3407.34	50.7575	42.1348	28.6423	49.1629	53.0431	52.064
LOC410170	protein FAM13A	410170	10163.2	0.245648	0.120138	2.04472	0.0408825	0.282905	10712.2	11928.6	10438.5	9120.35	8626.94	10152.6	22.5051	24.4112	21.799	17.0564	17.6609	20.929
LOC552043	probable dimethyladenosine transferase	552043	1372.48	-0.238926	0.116983	-2.0424	0.0411117	0.283513	1338.06	1212.32	1225.98	1532.9	1454.35	1471.24	18.6158	17.0739	16.8744	19.4631	19.1431	21.5123
LOC102656151	uncharacterized LOC102656151	102656151	40.4214	1.36349	0.667476	2.04276	0.0410764	0.283513	44.9117	82.8699	46.948	11.6748	37.7334	18.3905	0.172418	0.933764	0.37046	0.0748849	0.21757	0.0752769
LOC107965230	uncharacterized LOC107965230	107965230	8792.84	-0.171737	0.0840832	-2.04246	0.0411059	0.283513	7998.93	8367.99	8444.24	9419.23	9066.8	9459.85	0	0	1.10641	0.219038	0	0
LOC410325	trifunctional enzyme subunit alpha, mitochondrial	410325	9393.27	-0.248372	0.121562	-2.04317	0.0410351	0.283513	8660.99	9463.92	7634.39	9984.29	10551.3	10064.7	55.6484	57.1511	43.8534	55.1662	61.773	64.0715
LOC411905	protein O-GlcNAcase	411905	4038.96	0.225666	0.11051	2.04205	0.0411465	0.283558	4149.69	4243.12	4670.26	3950.75	3605.16	3614.75	13.238	13.3278	13.9316	11.1059	10.8994	11.7668
PRF	profilin	406154	47110.4	-0.232848	0.114065	-2.04136	0.0412148	0.283833	44205.5	41053.2	44691.3	56402.1	48279.4	48030.8	441.286	399.55	416.406	509.263	436.323	434.949
LOC411473	carnitine O-palmitoyltransferase 2, mitochondrial	411473	1824.97	-0.305873	0.1501	-2.03779	0.0415711	0.285488	1866.93	1613.63	1414.84	1966.04	2022.51	2065.86	15.8569	12.7103	10.5519	13.7584	15.6068	16.6555
LOC102656636	uncharacterized LOC102656636	102656636	231.045	0.736543	0.361333	2.03841	0.0415091	0.285488	230.753	211.365	424.666	150.605	196.214	172.666	1.51205	1.21738	2.4948	0.941152	1.13559	1.14629
LOC409933	glucose transporter type 1	409933	2585.12	0.350762	0.172146	2.03758	0.0415918	0.285488	2734.19	3041.98	2917.18	2367.65	2621.93	1827.81	5.61146	7.18561	6.15798	4.42823	5.53532	3.76948
LOC726411	immunoglobulin domain-containing protein oig-4	726411	29.2549	1.53476	0.753245	2.03753	0.0415974	0.285488	17.0355	48.4183	65.087	19.8472	11.8591	13.282	0.0698258	0.40555	0.631836	0.273052	0	0
LOC725641	U6 snRNA-associated Sm-like protein LSm5	725641	1482.73	-0.248952	0.12217	-2.03776	0.0415743	0.285488	1403.88	1320.33	1341.22	1495.54	1612.83	1722.57	38.0352	35.6323	34.5797	35.8741	40.0725	46.0502
Mir9878	microRNA 9878	104796166	1966.01	0.402882	0.197848	2.03633	0.0417177	0.285531	1992.38	2064.3	2660.03	1928.68	1382.12	1768.55
LOC552671	cytochrome b-c1 complex subunit 2, mitochondrial	552671	22174.4	-0.29679	0.145694	-2.03708	0.0416424	0.285531	18177.6	21136.5	20391.5	23792.1	21394.9	28153.8	190.625	210.753	192.364	213.8	203.705	288.033
LOC724950	integrin beta-PS	724950	82.0997	-1.64791	0.809213	-2.03644	0.0417064	0.285531	25.5532	14.898	78.9581	240.501	56.0611	76.6269	0.12874	0.0644661	0.279712	0.966161	0.270004	0.378145
LOC724458	achaete-scute complex protein T3	724458	81.1393	-1.11042	0.545259	-2.03649	0.0417007	0.285531	54.9781	29.7959	69.355	170.452	74.3888	87.8656	0.109602	0.0528511	0.143334	0.258621	0.144062	0.151033
LOC413435	mannose-1-phosphate guanyltransferase alpha-A	413435	3418.7	-0.215966	0.106116	-2.03519	0.0418318	0.285922	3414.06	3010.32	3064.43	3681.06	3621.33	3721	38.8736	32.148	31.1446	36.5384	38.0345	41.7273
LOC552381	neutral and basic amino acid transport protein rBAT	552381	2988.99	-0.207346	0.101875	-2.0353	0.0418205	0.285922	2885.96	2632.28	2805.14	3236.25	3084.44	3289.85	21.4966	19.1156	18.889	20.5438	21.2099	24.4351
LOC724971	uncharacterized LOC724971	724971	2332.54	0.7947	0.390538	2.03488	0.0418626	0.285938	1917.27	4624.88	2335.66	1159.31	2540	1418.11	1.13702	6.07049	1.56254	0.284697	2.96453	0.593575
LOC100577542	uncharacterized LOC100577542	100577542	433.154	0.671279	0.330177	2.03309	0.0420438	0.286979	450.666	414.349	731.962	317.555	251.197	433.198	2.01534	1.85259	3.02083	1.44451	1.05745	1.79422
LOC412117	mediator of RNA polymerase II transcription subunit 15	412117	1962.72	-0.264831	0.130326	-2.03205	0.0421481	0.287496	1647.02	1758.89	1944.08	2295.27	2096.9	2034.19	5.68855	5.82059	5.94693	6.83273	6.48905	7.02289
LOC409729	zinc finger protein 608	409729	38950.2	0.40534	0.199563	2.03114	0.0422407	0.287736	33182.8	45232	54744.6	36721.9	32509	31310.8	33.6385	46.4148	53.1733	31.9119	30.1909	30.5554
LOC551039	dihydrolipoyl dehydrogenase, mitochondrial	551039	12264.6	-0.254826	0.125526	-2.03007	0.0423495	0.288281	11459.5	10387.6	11706.1	13332.6	11989.5	14712.4	102.148	88.6736	94.392	100.471	96.6418	128.324
LOC409751	multiple inositol polyphosphate phosphatase 1	409751	15125.3	-0.389495	0.19193	-2.02936	0.0424213	0.288385	14508.8	11478.9	13299.1	21577.4	14881	15006.6	128.594	97.3827	105.024	164.596	120.316	131.176
LOC727087	serine/arginine-rich splicing factor 7	727087	729.682	-0.260985	0.128623	-2.02907	0.042451	0.288385	678.322	653.648	659.406	805.561	772.996	808.159	11.9843	11.1993	11.0784	12.5212	12.6641	14.634
LOC413047	venom carboxylesterase-6-like	413047	1535.92	0.860061	0.423829	2.02926	0.0424314	0.288385	1588.17	3433.98	919.755	990.023	958.429	1325.14	10.2785	21.6969	5.7214	5.87278	5.82143	8.86336
LOC552291	DNA replication licensing factor MCM4	552291	1358.31	-0.30116	0.1485	-2.02801	0.0425587	0.288921	1355.09	1089.41	1205.71	1613.46	1462.98	1423.22	7.70009	5.91017	6.3597	8.05027	7.64115	8.02757
LOC408652	protein suppressor of white apricot	408652	12377.4	0.214989	0.10604	2.02744	0.0426175	0.289124	12207.5	13505.9	14181.5	11749.5	10986.9	11633	47.3153	48.4682	49.64	39.6033	39.6913	44.8614
LOC102655781	uncharacterized LOC102655781	102655781	454.492	2.2932	1.13143	2.02681	0.0426822	0.289367	321.351	1319.4	624.195	15.1772	319.117	127.712	0.724823	3.04249	1.34287	0.0258278	0.703164	0.337417
LOC113219122	uncharacterized LOC113219122	113219122	379.799	-2.91162	1.43681	-2.02644	0.0427196	0.289425	20.9072	138.737	107.767	678.306	15.0934	1317.98	0.0698628	0.687963	0.661452	4.12868	0	8.53931
TRNAT-AGU	transfer RNA threonine (anticodon AGU)	107964395	8534.95	0.242794	0.119838	2.02601	0.0427635	0.289527	8674.93	8743.24	10337.1	8138.5	7513.27	7802.67	0	0	0	0	0	0	0	0	0	0	0	0	0	0	0	0	0	0	0	0	0	0
LOC726543	proline-rich nuclear receptor coactivator 2	726543	282.085	0.834339	0.412278	2.02373	0.042998	0.289554	350.002	509.324	225.137	152.94	164.949	290.161	2.43148	3.09049	0.649656	0.791423	1.02385	1.36977
LOC412379	copper-transporting ATPase 1	412379	3078.37	0.302589	0.14952	2.02373	0.0429974	0.289554	3212.74	3799.91	3187.13	3047.12	2430.03	2793.31	12.8434	14.1111	11.1201	10.1363	8.73034	10.8441
LOC726148	hemicentin-1	726148	67.0029	0.825815	0.408067	2.02373	0.0429984	0.289554	88.2747	87.5255	81.0921	59.5415	34.4991	51.0846	0.24161	0.248399	0.154241	0.17464	0.118799	0.175465
LOC100577213	tumor necrosis factor receptor superfamily member 4-like	100577213	1215.21	0.376442	0.185999	2.02389	0.0429813	0.289554	1490.6	1097.79	1530.08	1081.09	1119.07	972.651	16.0554	12.1853	14.8648	9.97651	11.9903	10.9868
LOC551809	putative elongator complex protein 1	551809	1319.38	-0.265808	0.131269	-2.02491	0.042877	0.289554	1204.87	1175.08	1214.25	1509.55	1519.04	1293.46	3.96007	3.79649	3.67062	4.45932	4.51765	4.16185
LOC409522	cell division cycle protein 27 homolog	409522	1097.36	0.293334	0.144867	2.02485	0.0428823	0.289554	1157.64	1122.93	1345.49	1018.04	1013.41	926.675	3.7533	3.63243	4.11296	3.16918	2.95536	3.04583
LOC100578952	protein tilB homolog	100578952	350.688	0.892926	0.441299	2.02341	0.0430314	0.289581	380.201	345.446	642.334	136.595	387.037	212.512	3.32173	3.13462	4.49379	1.08108	3.06983	1.97163
LOC100577112	astakine	100577112	3254.24	-0.621742	0.307428	-2.02239	0.0431356	0.290078	3167.05	3158.37	1364.69	4116.53	3629.96	4088.81	139.987	135.169	53.3159	161.856	146.514	185.785
LOC551584	probable 28S ribosomal protein S6, mitochondrial	551584	1833.51	-0.250699	0.123978	-2.02213	0.0431631	0.290078	1809.63	1664.85	1548.22	2033.75	1892.06	2052.58	29.4174	25.4964	23.3604	27.6268	28.3518	32.2548
LOC411011	guanine nucleotide-binding protein G(s) subunit alpha	411011	4226.18	0.310249	0.153505	2.02109	0.0432703	0.290603	4577.12	4731.96	4727.88	3284.12	4479.5	3556.51	3.81109	3.54871	3.02256	3.88979	4.03396	4.26583
LOC414017	protein Daple	414017	1814.96	0.294464	0.145878	2.01856	0.0435327	0.291585	1831.31	1950.7	2217.23	1760.56	1474.84	1655.14	7.10247	7.3046	7.55537	5.81685	5.24579	6.28281
LOC413588	bystin	413588	1023.9	-0.303476	0.150342	-2.01857	0.0435324	0.291585	1014.39	932.984	801.318	1133.62	1114.75	1146.34	12.5147	10.6533	9.18159	12.0595	12.1997	13.4944
LOC726199	tumor protein D54	726199	33405.6	-0.270499	0.133964	-2.01919	0.0434678	0.291585	33735.7	31149.8	25962.3	37247.3	34877.5	37461.4	284.577	267.925	204.67	285.46	265.614	316.478
LOC410239	trimethylguanosine synthase	410239	2409.15	0.202795	0.100458	2.01871	0.0435171	0.291585	2456.98	2634.14	2644.03	2252.07	2281.26	2186.42	9.43435	9.54309	8.97271	7.43378	7.78762	8.23217
LOC408874	uncharacterized LOC408874	408874	11587	0.279973	0.138771	2.01751	0.0436423	0.292124	11241.9	12590.6	14292.5	9567.5	10624.7	11204.9	10.2603	10.7156	10.9935	7.22389	8.46731	9.95054
LOC550811	protein timeless homolog	550811	1017.3	0.339962	0.168549	2.01699	0.0436965	0.292292	1080.98	1227.22	1101.14	1032.05	880.806	781.595	3.76972	4.39952	3.5122	3.16971	2.77861	2.86826
LOC726504	histone PARylation factor 1	726504	19682.4	-0.193485	0.0959747	-2.016	0.0437999	0.292787	18825.8	18762.1	17505.2	20889.7	19929.7	22182	21.0161	19.6805	16.0955	17.4457	19.1501	19.1944
LOC551432	zinc finger and BTB domain-containing protein 20	551432	2146.79	0.24239	0.120257	2.01561	0.0438412	0.292869	2328.44	2431.16	2220.43	1857.46	2136.79	1906.48	0.625349	0.917731	0.864114	0.571704	0.831515	0.641565
LOC100576253	DNA ligase 1	100576253	33.0528	-1.6755	0.831982	-2.01387	0.0440234	0.292915	13.1638	6.51785	27.742	87.561	38.8115	24.5206	0.121537	0.0468814	0.207055	0.527221	0.230438	0.158805
LOC100577437	uncharacterized LOC100577437	100577437	318.205	0.729481	0.362121	2.01447	0.0439605	0.292915	344.581	554.949	291.291	284.865	162.793	270.749	2.65647	3.50523	1.89765	1.82545	1.10493	1.88739
LOC724131	nucleoside diphosphate kinase 6	724131	2319.81	-0.342554	0.170091	-2.01395	0.0440151	0.292915	2430.65	1851.07	1854.45	2440.03	2464.53	2878.11	21.4661	15.0576	16.5548	20.0814	19.3521	24.7612
LOC107965891	electron transfer flavoprotein regulatory factor 1	107965891	274.041	0.419948	0.208524	2.01391	0.044019	0.292915	301.993	343.584	295.559	214.816	232.869	255.423	14.4522	20.3885	14.2828	10.9317	10.2721	12.8376
LOC102655112	probable G-protein coupled receptor Mth-like 5	102655112	2320.09	-0.315753	0.156706	-2.01493	0.0439115	0.292915	2169.7	2305.46	1725.34	2731.9	2504.42	2483.73	17.3912	17.9811	12.73	19.3189	18.426	19.621
LOC413081	F-box/WD repeat-containing protein 7	413081	1112.04	0.373425	0.185477	2.01332	0.0440815	0.293107	1051.55	1242.12	1472.46	1062.41	889.431	954.261	5.78341	7.03238	7.52206	5.22969	4.7108	5.28765
LOC408691	RING-box protein 1A	408691	5419.6	-0.168398	0.0837565	-2.01056	0.0443715	0.293552	5147.81	5096.03	5067.19	5565.38	5838.98	5802.19	120.831	121.27	108.841	109.834	122.09	130.621
LOC552175	mitochondrial-processing peptidase subunit alpha	552175	9208.91	-0.248892	0.123697	-2.01211	0.0442082	0.293552	7862.65	9011.4	8375.96	10465.3	8950.37	10587.8	62.8204	69.4138	61.1651	73.8303	66.2808	84.465
LOC412104	trafficking protein particle complex subunit 8	412104	5776.58	0.47161	0.234474	2.01135	0.0442885	0.293552	5088.96	5855.83	9193.28	5140.41	4917.21	4463.77	16.8603	18.9515	27.3031	14.5002	14.8136	14.5979
LOC410097	DNA repair protein complementing XP-G cells	410097	2619.65	0.31144	0.154903	2.01055	0.0443734	0.293552	2614.95	2691.87	3398.4	2196.03	2330.85	2485.78	11.198	10.7727	13.3613	8.19911	9.00709	10.7735
LOC726860	cytochrome b5	726860	58344.1	-0.315921	0.157042	-2.0117	0.044252	0.293552	56007.2	57861.8	42074	66528.9	60293.7	67298.9	948.841	938.766	646.195	971.928	933.351	1105.25
LOC413792	nucleoprotein TPR	413792	2164.48	-0.56273	0.279794	-2.01123	0.0443011	0.293552	2342.38	1738.4	1160.9	3105.5	2113.07	2526.65	19.247	13.6783	8.20499	22.527	15.7	20.5415
LOC727593	UDP-glucuronosyltransferase 2C1	727593	58604.2	-0.30887	0.153632	-2.01046	0.0443826	0.293552	56961.2	54715.5	45385.9	73239.5	64741.9	56581.3	528.07	487.184	380.476	593.541	546.583	518.225
LOC726804	protein BTG2	726804	15456.3	0.319622	0.159035	2.00976	0.0444569	0.293849	15266.1	18277.9	17940.5	13737.7	15877.1	11638.1	7.28698	9.76587	9.75603	4.69772	5.16009	4.401
LOC724628	protein mago nashi homolog	724628	1326.79	-0.275485	0.137189	-2.00807	0.0446359	0.294644	1291.6	1212.32	1096.88	1349.61	1531.98	1478.39	38.7414	34.4846	29.7565	35.0769	41.9627	43.9343
LOC410689	ELAV-like protein 2	410689	243.673	0.87851	0.437646	2.00735	0.044712	0.294952	192.811	263.508	490.82	232.329	128.294	154.276	0.542044	0.68842	0.866104	0.543773	0.257896	0.371677
LOC727631	uncharacterized LOC727631	727631	634.188	-0.588967	0.293558	-2.00631	0.0448236	0.295073	631.087	533.533	354.244	596.582	953.039	736.64	15.4638	12.06	8.51745	13.9987	21.3967	18.4841
LOC408413	26S proteasome non-ATPase regulatory subunit 7	408413	6418.62	-0.409056	0.20389	-2.00626	0.0448285	0.295073	6541.62	5928.45	4072.74	7916.68	6519.26	7532.94	70.0723	61.4188	39.6759	73.554	64.7044	78.7261
LOC551720	activator of 90 kDa heat shock protein ATPase homolog 1	551720	5305.05	-0.275202	0.137184	-2.00608	0.044848	0.295073	4903.89	4406.07	5091.73	6417.64	5119.89	5891.08	54.1429	46.6541	49.8068	60.1336	51.7111	64.104
LOC100576819	putative inactive caspase B	100576819	2327.83	-0.266692	0.133027	-2.00479	0.0449852	0.295654	2384.97	1919.04	2034.77	2518.25	2586.36	2523.58	13.9351	10.689	10.916	13.1495	14.2246	14.5001
LOC113218578	uncharacterized LOC113218578	113218578	682.316	0.515861	0.257326	2.0047	0.0449953	0.295654	941.597	817.525	649.803	415.623	671.655	597.69	4.19716	5.77528	3.99228	3.41574	3.92851	3.72708
LOC408653	calcium-dependent secretion activator	408653	1135.35	0.476898	0.23801	2.00369	0.0451037	0.296172	1155.32	1591.29	1217.45	1034.39	706.154	1107.51	1.53845	2.13642	1.57485	1.25435	0.626165	1.18019
LOC410019	uncharacterized protein KIAA1109	410019	4842.21	0.360661	0.180058	2.00303	0.0451745	0.296443	4666.95	4844.63	6822.4	4380.39	4195.96	4142.96	3.20472	3.46795	4.81247	2.82962	2.73262	2.93398
LOC726827	coiled-coil domain-containing protein 170	726827	288.446	0.527819	0.263651	2.00196	0.0452894	0.297002	306.639	338.928	376.651	247.506	178.964	281.987	0.99641	1.09455	0.978875	0.661101	0.541833	0.950718
LOC102654920	COMM domain-containing protein 7	102654920	148.216	0.638053	0.319155	1.99919	0.0455876	0.297025	195.908	207.64	137.643	103.906	136.918	107.278	15.2373	10.8068	4.97571	4.003	5.32481	6.85883
LOC100578307	multiple inositol polyphosphate phosphatase 1	100578307	23.5111	-1.67123	0.836074	-1.9989	0.0456187	0.297025	4.64604	19.5536	9.60301	49.0342	19.4058	38.8243	0.0417501	0.144949	0.0673642	0.343128	0.133877	0.378492
LOC100576374	protein MMS22-like	100576374	183.191	-0.59824	0.29922	-1.99933	0.0455728	0.297025	109.956	167.602	160.05	242.836	230.713	187.991	0.365808	0.589374	0.451385	0.785177	0.896293	0.735088
LOC726431	uncharacterized LOC726431	726431	1781.61	0.233827	0.116908	2.0001	0.0454899	0.297025	1781.76	1996.33	1999.56	1661.32	1673.21	1577.49	16.9752	17.5863	17.033	13.2424	14.4338	14.6568
LOC409457	eIF-2-alpha kinase activator GCN1	409457	1897.75	0.229199	0.114659	1.99897	0.045612	0.297025	2128.66	1897.63	2118	1804.92	1705.55	1731.77	1.8551	1.98285	2.00835	1.40758	1.55173	1.375
LOC412127	peptidyl-tRNA hydrolase 2, mitochondrial	412127	1059.79	-0.290667	0.145235	-2.00135	0.0453544	0.297025	1012.84	1006.54	839.73	1188.49	1192.38	1118.75	28.3871	27.2093	21.4516	28.4942	30.6892	30.1114
LOC413727	probable ATP-dependent RNA helicase pitchoune	413727	1669.81	-0.253848	0.126965	-1.99935	0.04557	0.297025	1460.41	1432.07	1678.39	1820.1	1755.14	1872.76	8.57593	8.14801	8.93524	9.53117	9.88874	11.1582
LOC412986	putative fatty acyl-CoA reductase	412986	878.372	-0.453629	0.22663	-2.00163	0.0453245	0.297025	790.601	884.566	548.438	918.807	1106.13	1021.69	6.65935	7.22777	3.83005	6.90753	7.95534	8.57731
LOC552287	uncharacterized protein PFB0145c	552287	1760.03	0.254545	0.127239	2.00052	0.0454438	0.297025	1933.53	1739.34	2072.12	1601.78	1663.51	1549.91	7.80168	6.54268	7.72483	5.53503	6.21795	6.1288
LOC550655	protein FAM49B	550655	269.671	-1.0438	0.521944	-1.99982	0.0455193	0.297025	87.5004	267.232	173.921	468.16	449.567	171.644	0.462517	1.32683	0.83959	2.32813	2.25614	0.889234
LOC107965485	uncharacterized LOC107965485	107965485	476.797	0.46267	0.231789	1.99608	0.0459253	0.297878	603.985	634.094	419.331	370.091	421.536	411.742	1.02723	1.09515	0.693397	0.573504	0.628918	0.717132
LOC113218641	uncharacterized LOC113218641	113218641	381.08	0.422284	0.211588	1.99578	0.0459576	0.297878	368.586	511.186	430.001	312.885	326.664	337.159	5.40583	7.45526	5.54	3.67767	4.12821	4.8264
LOC726128	leucine-rich repeats and immunoglobulin-like domains protein 3	726128	1044.78	0.379208	0.189964	1.99621	0.0459114	0.297878	990.381	1148.07	1406.31	950.329	819.354	954.261	4.31422	4.88205	5.39448	3.52859	3.21305	3.75102
LOC100578777	uncharacterized LOC100578777	100578777	602.187	-0.378728	0.18972	-1.99625	0.0459069	0.297878	440.599	549.362	581.515	723.838	699.686	618.124	2.37284	2.94741	2.8171	3.03447	3.5939	3.1759
LOC100576167	gustatory and pheromone receptor 32a-like	100576167	23.0874	-1.64144	0.82187	-1.99721	0.0458029	0.297878	9.29208	7.44898	17.072	16.3447	29.1086	59.2582	0.105726	0.0816584	0.090424	0.183543	0.333871	0.783943
LOC107965338	synaptic vesicle glycoprotein 2C	107965338	35038.7	-0.372612	0.18668	-1.996	0.0459342	0.297878	35209.2	32944	23462.3	37030.1	44475.9	37110.9	2.38136	3.06464	1.36511	1.25567	2.23159	2.01336
LOC412703	protein toll	412703	1753.67	0.477046	0.239085	1.99529	0.0460108	0.297913	1612.95	2757.98	1752.02	1595.95	1476.99	1326.16	6.66457	10.8598	6.24347	5.62513	5.71525	5.29487
LOC726045	apoptosis-resistant E3 ubiquitin protein ligase 1	726045	1996.12	0.339324	0.17009	1.99497	0.0460462	0.297913	1831.31	2583.86	2274.85	1725.54	1866.19	1694.99	6.05914	8.80636	7.08106	5.06721	5.80297	5.9144
LOC727249	calcium/calmodulin-dependent protein kinase type 1	727249	2267.4	0.266794	0.133737	1.99492	0.0460522	0.297913	2276.56	2478.65	2674.97	2139.99	1866.19	2168.03	12.8299	13.9689	14.0204	10.6972	9.62987	11.7003
LOC410734	glucose dehydrogenase [FAD, quinone]	410734	66.5491	-2.39297	1.19976	-1.99454	0.0460928	0.297984	2.32302	45.625	16.005	19.8472	288.93	26.564	0.0215562	0.374214	0.110288	0.14027	2.12518	0.225515
LOC411857	charged multivesicular body protein 4b	411857	5722.54	-0.210388	0.105538	-1.99349	0.0462082	0.298537	5295.71	5362.33	5260.31	6034.7	5726.86	6655.31	94.5294	94.6577	86.3359	98.8429	95.8807	118.677
LOC409880	26S proteasome non-ATPase regulatory subunit 12	409880	12750.6	-0.194047	0.0973641	-1.99301	0.0462608	0.298684	12744.1	11631.6	11305.9	13890.7	13207.8	13723.4	115.371	99.707	92.0551	108.145	108.499	121.704
LOC725687	breast cancer type 2 susceptibility protein	725687	1616.82	-0.235952	0.118417	-1.99255	0.0463109	0.298816	1376	1517.73	1562.09	1729.04	1706.63	1809.42	5.95384	6.10384	5.71038	6.35146	6.76262	7.46269
LOC102654135	uncharacterized LOC102654135	102654135	45.8361	1.01617	0.510081	1.99217	0.0463522	0.298889	42.5887	76.352	65.087	37.3594	29.1086	24.5206	0.319248	0.806586	0.632102	0.377803	0.293364	0.227794
LOC551395	acetyl-CoA acetyltransferase, cytosolic	551395	28150.7	0.52576	0.264118	1.99062	0.0465224	0.299794	29514.7	30904.9	39252.8	30815.6	14889.6	23526.5	293.498	293.734	352.525	264.372	134.627	232.331
LOC102656671	uncharacterized LOC102656671	102656671	295.051	-0.578173	0.290674	-1.98908	0.0466928	0.300565	249.337	203.916	257.147	247.506	393.506	418.894	2.36209	2.23025	2.31689	2.3531	3.96065	4.36078
LOC725905	pre-mRNA-splicing factor 18	725905	911.976	-0.300644	0.151195	-1.98845	0.0467619	0.300565	915.27	743.035	792.782	997.028	1050.07	973.673	13.6607	9.7604	9.93675	12.7558	13.5609	13.6076
LOC409913	COMM domain-containing protein 4	409913	1583.68	-0.316566	0.159177	-1.98876	0.0467278	0.300565	1489.83	1314.74	1426.58	2016.24	1730.35	1524.37	32.2066	27.6534	27.2536	39.6549	34.3775	32.7985
LOC726274	yellow-e	726274	147.585	-0.838245	0.421527	-1.98859	0.0467463	0.300565	161.837	92.1811	62.953	179.792	185.433	203.317	1.82059	0.872506	0.557973	1.77761	1.94318	2.38185
LOC725397	probable E3 ubiquitin-protein ligase makorin-1	725397	1566.12	0.390473	0.196427	1.98788	0.0468252	0.300709	1880.87	2088.51	1360.43	1314.58	1326.06	1426.28	8.71464	11.0071	6.66783	6.13816	6.41772	8.09809
LOC551587	RNA-binding protein 24	551587	5301.21	0.329317	0.165677	1.98771	0.0468443	0.300709	4908.54	5979.67	6823.47	5187.11	4341.5	4566.97	17.5959	20.0818	21.5927	15.2551	12.9891	15.2034
LOC100577517	uncharacterized LOC100577517	100577517	1353.55	0.44918	0.226066	1.98694	0.0469287	0.301059	1169.25	1502.83	2016.63	1111.44	1129.85	1191.29	0.644089	0.872064	1.23678	0.582938	0.593567	0.641348
LOC551169	succinate dehydrogenase [ubiquinone] iron-sulfur subunit, mitochondrial	551169	11694.1	-0.214565	0.108006	-1.98661	0.046966	0.301105	11531.5	10609.2	10337.1	11826.6	12385.2	13475.1	210.938	186.197	172.999	188.685	208.157	245.106
LOC100578478	uncharacterized LOC100578478	100578478	74.1954	-0.774965	0.390223	-1.98596	0.0470382	0.301216	41.04	60.5229	62.953	102.738	80.8574	97.0608	0.343173	0.435622	0.44488	0.678067	0.585019	0.908512
LOC100576085	ras-related protein Rab-8A	100576085	6066.54	-0.255998	0.128912	-1.98583	0.0470521	0.301216	5550.47	6127.71	4910.34	6634.79	6252.97	6922.99	37.1952	39.4852	30.0947	39.1904	38.2713	46.2721
LOC551528	thymosin beta	551528	13439.3	-0.306354	0.154285	-1.98564	0.0470734	0.301216	13404.6	12504	10142.9	16459.1	14567.3	13557.9	177.639	155.717	116.072	180.991	169.62	171.982
LOC410973	mediator of RNA polymerase II transcription subunit 22	410973	1361.55	0.43279	0.21813	1.98409	0.0472458	0.302011	1248.24	1776.58	1668.79	932.817	1345.47	1197.42	13.7063	17.9885	15.8621	8.7102	13.2955	12.9174
LOC725556	intraflagellar transport protein 81 homolog	725556	20372.7	-0.181055	0.0912584	-1.98398	0.0472579	0.302011	19084.4	19646.7	18556.2	22677.1	20484.9	21786.6	15.0838	14.1575	16.3092	15.5098	12.1271	14.3417
LOC726513	ATP-binding cassette sub-family G member 5	726513	2686.27	-0.291389	0.146972	-1.98262	0.0474104	0.3026	2381.1	2482.37	2383.68	3452.24	2737.29	2680.92	17.8982	17.8197	15.4142	22.5993	19.0054	21.1038
LOC551795	xenotropic and polytropic retrovirus receptor 1 homolog	551795	1249.37	0.315275	0.159019	1.98263	0.0474092	0.3026	1290.05	1491.66	1374.3	1235.19	962.742	1142.25	6.20664	6.92084	5.94864	5.35346	4.00316	5.14177
LOC412093	serine/threonine-protein phosphatase 1 regulatory subunit 10	412093	10453.7	0.282858	0.142722	1.98188	0.047493	0.302934	10795.8	10209.8	13420.7	9850.03	9295.36	9150.28	32.0472	29.3223	34.4971	24.8279	24.1737	24.2754
LOC725946	integrin alpha-8	725946	1262.47	0.430824	0.217413	1.98159	0.0475254	0.302948	1100.34	1482.35	1766.95	1100.93	959.507	1164.73	3.06128	3.82574	4.42466	2.59008	2.57009	3.14079
LOC724379	tubulin polyglutamylase TTLL4	724379	2774.6	0.214937	0.108668	1.97792	0.0479382	0.303097	2872.8	3176.99	2892.64	2693.38	2506.58	2505.19	7.41209	6.58573	7.71353	5.70645	4.91347	4.6544
LOC102655617	ribonuclease P protein subunit p20	102655617	1080.72	-0.251782	0.127221	-1.9791	0.0478051	0.303097	1057.75	980.471	920.822	1162.81	1197.77	1164.73	22.5149	24.8916	19.1878	24.7907	26.1731	25.7494
LOC551167	multidrug resistance protein homolog 49	551167	60357.7	0.234951	0.118665	1.97995	0.0477095	0.303097	67472.9	65310.8	63000	62365.6	51624.7	52372	139.654	127.857	116.401	111.052	97.3517	106.604
LOC102654331	tubulin polyglutamylase TTLL4-like	102654331	219.876	0.847387	0.428224	1.97884	0.0478337	0.303097	401.108	169.464	277.42	117.915	133.684	219.664	1.12327	0.463148	0.6411	0.296329	0.307971	0.646752
LOC552691	serine/threonine-protein kinase VRK1	552691	572.458	-0.489707	0.247572	-1.97804	0.0479245	0.303097	537.392	341.722	549.505	671.301	732.029	602.799	4.20254	2.59551	3.97041	4.71047	5.25347	5.07501
LOC413166	myb-like protein D	413166	174.385	0.81407	0.411178	1.97985	0.0477209	0.303097	223.784	299.821	142.978	165.782	125.059	88.8873	2.06623	2.41957	1.04541	1.25083	1.03238	0.816984
LOC409809	T-complex protein 1 subunit beta	409809	13568.3	-0.319552	0.161517	-1.97844	0.0478793	0.303097	13923.4	12176.3	10114.1	16414.8	13499.9	15281.5	118.579	99.2535	78.1959	119.859	104.659	127.796
LOC413425	phosphatidylinositol 4-phosphate 3-kinase C2 domain-containing subunit beta	413425	1800.5	0.344112	0.17398	1.97789	0.0479417	0.303097	1901	2364.12	1777.62	1416.15	1759.46	1584.65	5.03881	5.84227	4.18663	3.12445	4.30131	4.01258
LOC100576963	zinc finger and BTB domain-containing protein 14	100576963	2153.8	0.410733	0.207407	1.98032	0.0476673	0.303097	2028.77	2544.76	2801.94	2132.99	1461.9	1952.45	3.19083	5.96949	4.32231	1.46743	1.16302	2.05464
LOC410298	conserved oligomeric Golgi complex subunit 6	410298	993.404	-0.239669	0.121061	-1.97973	0.0477335	0.303097	953.212	871.53	908.018	1085.76	1082.41	1059.5	7.10619	6.36776	6.16782	7.10548	7.37087	7.72311
LOC102654666	uncharacterized LOC102654666	102654666	39.8328	-0.977874	0.493774	-1.98041	0.0476579	0.303097	21.6815	35.3826	23.474	51.3691	54.983	52.1063	1.0762	3.40408	0	4.24835	5.80819	3.33153
LOC413842	splicing factor U2af 38 kDa subunit	413842	4800.09	-0.202101	0.10224	-1.97674	0.0480712	0.303404	4527.57	4690.06	4175.17	4936.11	5220.15	5251.5	87.221	89.8077	76.7424	84.7224	96.6411	104.847
LOC724546	sodium-coupled monocarboxylate transporter 1	724546	170.549	-0.587696	0.297298	-1.97679	0.0480649	0.303404	124.669	164.809	119.504	170.452	203.761	240.098	0.830885	0.991336	0.59725	0.855947	1.12699	1.40321
LOC412868	ubiquitin recognition factor in ER-associated degradation protein 1	412868	5129.38	-0.23421	0.118488	-1.97665	0.0480811	0.303404	4981.33	4889.32	4270.14	5302.69	5901.51	5431.32	87.869	83.4585	69.3444	81.6046	95.1739	94.7007
LOC551872	porphobilinogen deaminase	551872	5474.97	-0.345237	0.174682	-1.97638	0.0481117	0.303407	4993.72	3979.62	5496.12	6173.63	5341.98	6864.75	51.9662	39.2587	50.832	55.995	50.3875	69.8008
LOC102653770	uncharacterized LOC102653770	102653770	22.7274	-1.50887	0.76358	-1.97605	0.0481491	0.303451	16.2611	8.3801	10.67	36.1919	48.5144	16.3471	0.285267	0.110268	0.183479	0.619289	0.720269	0.186738
LOC100577476	uncharacterized LOC100577476	100577476	17.1721	1.70685	0.864831	1.97362	0.0484248	0.304997	26.3276	35.3826	17.072	12.8423	3.23429	8.17354	0.191506	0.197005	0.136075	0.083077	0.0268952	0
LOC409693	inositol monophosphatase 1	409693	4431.25	-0.2188	0.110883	-1.97324	0.048468	0.305077	3793.49	4020.58	4475	4749.31	4791.07	4758.02	58.7353	60.857	63.996	62.9226	67.7781	75.0465
LOC725935	claspin-like	725935	195.14	-0.630357	0.31964	-1.97208	0.0486003	0.305718	181.196	159.222	118.437	297.707	224.244	190.035	0.713534	0.609848	0.395841	0.968643	0.784638	0.783957
LOC410776	protein 60A	410776	6468.68	0.486482	0.246743	1.97162	0.0486534	0.30586	5597.7	9763.75	7286.55	4143.39	5926.3	6094.4	15.9264	26.6684	18.6386	10.3372	15.728	17.2943
Ppib	peptidylprolyl isomerase B (cyclophilin B)	552033	7884.57	-0.255209	0.129461	-1.97132	0.0486869	0.305879	7116.18	8067.24	6382.8	8980.26	8242.06	8518.87	155.388	165.373	126.477	170.53	162.887	182.176
LOC413891	NADH-ubiquinone oxidoreductase 49 kDa subunit	413891	18940.5	-0.281075	0.142675	-1.97003	0.0488346	0.306423	15747.8	18248.1	17308.9	20210.2	18371.9	23756.4	142.349	156.922	141.909	158.877	154.058	215.875
LOC107964793	uncharacterized LOC107964793	107964793	48.9835	1.2902	0.655346	1.96872	0.0489847	0.307139	41.8144	83.801	83.2261	19.8472	16.1715	49.0412	0.074796	0.210668	0.233188	0.0540452	0.0420316	0.140198
LOC409364	CD2-associated protein	409364	1278.39	0.49902	0.253589	1.96783	0.0490876	0.307353	1178.55	1383.65	1930.2	1077.58	1264.61	835.745	3.22682	3.81295	4.97253	2.6995	3.33175	1.88026
LOC724765	protein embryonic gonad	724765	14403	-0.33148	0.168463	-1.96768	0.0491053	0.307353	15230.5	12852.3	10182.4	15968.8	15965.6	16218.3	56.722	44.3063	33.415	51.222	52.6338	60.7306
Blop	blue-sensitive opsin	406128	24.9333	-1.28986	0.655869	-1.96664	0.0492245	0.307627	9.29208	13.0357	21.34	42.0293	30.1867	33.7159	0.107001	0.123884	0.137017	0.208919	0.270423	0.0699794
LOC102654091	meckelin	102654091	104.922	-0.925197	0.470443	-1.96665	0.0492238	0.307627	65.8189	95.9056	55.484	100.403	103.497	208.425	0.237363	0.274587	0.181935	0.391217	0.300093	0.848219
LOC100577159	protein PFC0760c	100577159	89.7684	-0.901466	0.458412	-1.9665	0.0492411	0.307627	45.6861	84.7321	57.618	92.2309	94.8726	163.471	2.79341	2.73782	2.59703	3.22884	3.67663	3.61046
LOC100577428	uncharacterized LOC100577428	100577428	68.4358	0.888875	0.452593	1.96396	0.0495343	0.309073	58.0755	90.3188	118.437	50.2016	50.6706	42.9111	0.249188	0.322283	0.393876	0.13512	0.163002	0.148876
LOC410031	transcription factor SPT20 homolog	410031	2797.44	0.201389	0.102528	1.96423	0.0495036	0.309073	2946.36	2891.13	3140.18	2647.84	2491.48	2667.64	10.0372	9.27397	10.2359	8.27101	7.79112	8.73275
LOC107964083	uncharacterized LOC107964083	107964083	692.365	0.376652	0.191897	1.96278	0.0496721	0.30974	668.255	829.63	849.333	646.784	518.565	641.623	2.36941	3.2596	2.65884	2.06234	1.47755	2.07215
LOC551894	transient receptor potential mucolipin	551894	3808.22	0.420078	0.21407	1.96234	0.049723	0.309779	3989.4	5686.36	3400.53	3020.27	3229.98	3522.8	28.8752	39.8157	22.4167	18.9311	21.9098	25.8397
LOC411806	GTPase-activating protein and VPS9 domain-containing protein 1	411806	2038.89	0.376235	0.191742	1.96219	0.0497401	0.309779	1908.75	2106.2	2895.84	1780.41	1736.82	1805.33	5.23209	5.57331	7.31162	4.28948	4.38218	4.76405
LOC551570	leucine-rich melanocyte differentiation-associated protein	551570	1519.94	-0.292314	0.149439	-1.95607	0.050457	0.312402	1511.51	1417.17	1169.43	1704.52	1690.46	1626.53	18.0147	14.619	11.6059	17.5669	18.3493	18.8583
LOC102655053	uncharacterized LOC102655053	102655053	49.5921	-0.966044	0.493904	-1.95593	0.0504728	0.312402	21.6815	40.9694	38.412	53.7041	73.3107	69.4751	0.27486	0.798981	0.676549	0.720611	1.19794	0.934407
LOC726918	uncharacterized LOC726918	726918	1192.51	0.274724	0.140397	1.95677	0.0503743	0.312402	1187.84	1407.86	1322.01	1097.43	1005.87	1134.08	2.87465	3.39486	2.99662	1.93131	2.05447	2.46168
LOC100576189	uncharacterized LOC100576189	100576189	1239.67	0.227942	0.116512	1.95638	0.05042	0.312402	1293.92	1385.51	1332.68	1195.5	1113.68	1116.71	15.4508	16.3302	14.3676	13.0905	12.4844	13.09
LOC551162	uncharacterized LOC551162	551162	603.922	0.366984	0.187587	1.95634	0.0504257	0.312402	643.476	683.444	713.823	624.602	485.144	473.044	4.7205	5.7016	4.69229	3.91721	3.1146	3.30152
LOC726972	uncharacterized LOC726972	726972	1083.53	-0.324301	0.165906	-1.95473	0.0506148	0.312894	913.721	1061.48	911.219	1382.3	1114.75	1117.73	2.16764	2.44646	1.98653	2.87797	2.50661	2.64836
LOC102653680	centrosomal protein of 78 kDa-like	102653680	80.0178	0.65652	0.336209	1.95271	0.0508538	0.313224	95.2438	94.9744	103.499	70.0488	56.0611	60.2799	0.307003	0.297386	0.296305	0.194289	0.167901	0.173508
LOC113219300	uncharacterized LOC113219300	113219300	7890.21	0.298549	0.152881	1.95282	0.0508406	0.313224	7135.54	9367.09	9609.41	7413.5	7018.42	6797.32	0.167077	0.222854	0.303116	0.142103	0.130045	0.184752
LOC408850	pre-mRNA-processing factor 39	408850	8662.77	0.245376	0.125576	1.95401	0.0506998	0.313224	8497.61	9378.26	10317.9	8555.29	7640.48	7587.09	29.6634	30.4977	30.727	25.9636	24.5989	26.4807
LOC551345	WD repeat-containing protein 55 homolog	551345	1546.26	-0.236169	0.120913	-1.95322	0.0507936	0.313224	1436.4	1337.09	1486.33	1776.9	1640.87	1599.97	19.051	16.5335	17.6183	19.7974	19.6595	19.8491
LOC413652	ATP-binding cassette sub-family F member 3	413652	3304.16	-0.26528	0.135853	-1.9527	0.0508555	0.313224	3088.84	3125.78	2788.07	4052.32	3265.56	3504.41	17.6834	16.727	14.2364	20.346	18.1256	20.0849
LOC552468	MATH and LRR domain-containing protein PFE0570w-like	552468	1701.06	0.384275	0.196704	1.95357	0.0507523	0.313224	1570.36	1797.07	2412.49	1440.67	1432.79	1552.97	3.92087	4.30067	5.68545	3.13237	3.3286	3.6081
apd-3	apidermin 3	409716	186.827	0.941777	0.482638	1.95131	0.0510201	0.313469	241.594	317.513	178.189	60.709	197.292	125.668	1.40724	2.45089	1.23871	0	1.29108	1.00566
LOC410037	dnaJ homolog subfamily C member 7	410037	3842.62	0.318635	0.163267	1.95162	0.0509833	0.313469	3822.14	4354.86	4619.05	3906.39	2878.52	3474.78	33.576	37.2321	39.1599	31.1961	23.8607	29.8102
LOC411653	sodium channel protein 60E	411653	270.495	0.830806	0.425752	1.95138	0.0510113	0.313469	183.519	335.204	520.696	168.117	168.183	247.25	0.171863	0.354056	0.323295	0.114636	0.187703	0.156456
LOC551379	chitobiosyldiphosphodolichol beta-mannosyltransferase	551379	2495.23	0.26252	0.134535	1.95131	0.0510203	0.313469	2645.15	3040.11	2479.71	2135.32	2283.41	2387.7	13.6025	14.9073	10.6316	9.45086	10.8967	12.3072
LOC726840	BET1 homolog	726840	1041.07	-0.279565	0.143316	-1.95069	0.0510934	0.313725	901.332	866.875	1054.2	1125.45	1166.5	1132.04	21.645	19.7512	22.6664	22.692	24.927	26.821
LOC727293	guanine deaminase	727293	2901.36	-0.361228	0.185226	-1.9502	0.051152	0.313861	2831.76	2387.4	2400.75	2841.65	2931.35	4015.25	25.1129	20.0446	19.7345	22.4422	25.314	35.3784
LOC412221	proliferation-associated protein 2G4	412221	5518.23	-0.314776	0.161425	-1.94998	0.0511781	0.313861	4381.99	4649.09	5725.53	6919.65	5827.12	5606.03	47.1858	46.4767	54.9297	62.2281	55.4935	57.4644
LOC725164	serine-rich adhesin for platelets	725164	146.817	-1.22625	0.628984	-1.94956	0.0512281	0.313975	59.6242	114.528	89.6281	402.781	132.606	81.7354	0.0793569	0.178594	0.113991	0.524916	0.169745	0.116898
LOC409979	DNA replication licensing factor Mcm7	409979	244.076	-0.785609	0.403156	-1.94865	0.0513378	0.314456	146.35	206.709	184.591	407.451	357.929	161.427	1.03174	1.27752	1.15673	2.42609	2.17378	1.06501
LOC411724	glycerol-3-phosphate acyltransferase 1, mitochondrial	411724	4884.7	0.164199	0.0842802	1.94825	0.0513852	0.314554	5174.91	5134.21	5178.15	4507.64	4736.08	4577.18	23.1517	20.993	20.3315	17.4036	19.7706	20.737
LOC413179	mediator of RNA polymerase II transcription subunit 7	413179	1039.1	-0.23079	0.118496	-1.94767	0.0514549	0.314788	930.757	1000.03	937.894	1107.94	1113.68	1144.3	18.1142	18.0625	16.2063	18.8309	19.3915	21.545
LOC724466	uncharacterized LOC724466	724466	19.8824	1.54363	0.793916	1.94432	0.051857	0.316669	44.9117	13.9668	29.876	10.5073	11.8591	8.17354	0.182643	0.0701038	0.181964	0.0529092	0.0513899	0.0531634
LOC725415	BTB/POZ domain-containing protein KCTD16	725415	58.9805	1.69823	0.873351	1.9445	0.0518358	0.316669	99.1155	126.633	44.814	4.66992	58.2173	20.4339	0.397331	0.49064	0.131623	0.0498824	0.364662	0.167192
LOC412166	acyl-CoA Delta(11) desaturase	412166	22108	-0.236952	0.121841	-1.94476	0.0518036	0.316669	19322.9	20937.2	20629.4	26623.2	23651.3	21484.2	194.263	206.893	192.482	233.153	215.155	213.566
LOC727119	uncharacterized LOC727119	727119	1008.28	0.422463	0.217409	1.94318	0.051995	0.316932	1374.45	969.298	1120.35	950.329	694.295	940.979	14.6851	11.8206	11.3769	8.09227	6.46094	9.70707
LOC412897	E3 ubiquitin-protein ligase MYLIP	412897	7091.61	0.358015	0.184231	1.9433	0.0519804	0.316932	6940.41	9871.76	7089.15	6262.36	5545.74	6840.23	24.389	31.8786	22.3725	18.6844	18.0352	24.2778
LOC551297	sorting nexin-14	551297	3593.13	0.194095	0.0998629	1.94361	0.0519423	0.316932	3689.73	3767.32	4047.13	3432.39	3234.29	3387.93	20.9041	20.0298	20.6272	16.6073	16.2106	18.1627
LOC550968	heat shock protein 75 kDa, mitochondrial	550968	4022.61	-0.229521	0.118137	-1.94283	0.0520361	0.31699	3616.17	3623.93	3870.01	4711.95	3946.92	4366.71	26.6855	25.3363	25.9559	30.2069	26.3715	31.9829
LOC411510	DNA-directed RNA polymerases I and III subunit RPAC1	411510	2069.97	-0.253338	0.130439	-1.94219	0.0521135	0.317269	2062.84	1822.21	1779.76	2420.19	2104.45	2230.35	30.5739	26.0853	24.5549	29.3094	28.6269	32.7828
LOC552030	uncharacterized LOC552030	552030	262.355	0.777242	0.400415	1.94109	0.0522469	0.317311	186.616	306.339	501.49	219.486	186.511	173.688	0.441367	0.537612	1.17598	0.389607	0.368821	0.339921
LOC413879	CDP-diacylglycerol--glycerol-3-phosphate 3-phosphatidyltransferase, mitochondrial	413879	1670.55	-0.34401	0.17716	-1.94181	0.0521606	0.317311	1450.34	1433.93	1533.28	1695.18	1631.16	2279.4	10.3469	10.5734	10.5294	11.7335	11.8004	18.6624
LOC102656620	snRNA-activating protein complex subunit 4 homolog	102656620	1013.69	-0.38209	0.196792	-1.94159	0.0521869	0.317311	909.849	908.775	821.591	1160.48	1367.03	914.415	6.1754	6.66999	5.61136	6.06179	8.14515	5.97407
LOC102655603	transmembrane emp24 domain-containing protein 7	102655603	8108.46	-0.181848	0.0936758	-1.94125	0.0522283	0.317311	7360.88	7629.61	7804.04	9100.51	8474.93	8280.82	103.318	100.85	98.1715	108.523	106.259	114.559
LOC412876	pyruvate carboxylase, mitochondrial	412876	8176.57	0.448277	0.231144	1.93938	0.052455	0.317996	6399.14	10418.3	11493.7	6551.9	7711.64	6484.68	12.7045	19.9954	21.0155	10.1693	11.8276	10.9266
LOC413195	alsin	413195	1571.85	0.391302	0.20172	1.93983	0.0524006	0.317996	1395.36	1849.21	2107.33	1481.53	1201	1396.65	4.26574	5.32528	5.81621	3.75705	3.28525	4.16507
LOC102656465	guanine nucleotide-binding protein G(o) subunit alpha	102656465	722.163	0.40644	0.209571	1.9394	0.0524532	0.317996	792.924	902.257	774.643	623.434	495.925	743.792	4.46838	4.67102	3.8749	3.15249	2.41412	3.82285
LOC410626	sodium-coupled monocarboxylate transporter 1	410626	24388.6	1.65613	0.854146	1.93893	0.05251	0.318138	6386.76	60889.8	43808.9	8826.15	15912.7	10507.1	21.2155	227.861	154.3	25.3018	52.2926	35.5723
LOC725683	uncharacterized LOC725683	725683	412.206	-0.648907	0.334811	-1.93813	0.0526074	0.318535	247.014	353.826	362.78	345.574	709.388	454.653	1.02364	1.06842	0.667274	1.0187	1.29409	0.918611
LOC550929	serine/threonine-protein kinase PINK1, mitochondrial	550929	29342.5	-0.2315	0.119501	-1.93723	0.0527175	0.318817	27033	28440.2	25506.7	31121.5	28891.9	35061.4	183.77	184.435	158.691	184.253	181.093	235.826
LOC727009	cytoplasmic tRNA 2-thiolation protein 2	727009	1656.32	-0.227451	0.117456	-1.93647	0.0528096	0.319182	1650.12	1469.31	1457.52	1809.59	1796.11	1755.27	17.5275	15.461	14.0393	17.0577	17.292	18.009
LOC413934	sodium-independent sulfate anion transporter	413934	848.424	-0.568968	0.293861	-1.93618	0.0528459	0.319209	940.823	530.74	577.247	1209.51	1060.85	771.378	5.08336	2.79219	2.88514	5.6541	5.1474	4.27079
LOC725618	myb-binding protein 1A	725618	2702.05	0.217421	0.112338	1.93542	0.0529386	0.319576	3033.86	2666.73	3015.34	2427.19	2509.81	2559.34	11.8016	10.0447	10.9361	8.14652	8.81186	9.76936
LOC102654795	putative uncharacterized protein DDB_G0281733	102654795	77.7872	-0.709755	0.366967	-1.93411	0.0530996	0.320355	48.7834	61.4541	67.221	81.7236	100.263	107.278	0.177833	0.205921	0.214278	0.231658	0.308706	0.400307
LOC409740	alpha-tocopherol transfer protein-like	409740	161934	-0.622616	0.322189	-1.93246	0.053303	0.321024	183934	127964	70672.8	151755	206784	230495	1358.12	896.563	476.648	966.366	1391.71	1692.04
LOC100578947	SUN domain-containing ossification factor	100578947	1931.36	0.24091	0.124644	1.93278	0.0532633	0.321024	1917.27	2203.03	2157.48	1705.69	1721.72	1882.98	3.48481	3.85965	3.72047	2.81734	2.97184	2.91815
LOC410200	mRNA turnover protein 4 homolog	410200	1647.58	-0.323795	0.167559	-1.93243	0.0533066	0.321024	1503.77	1246.77	1639.98	1891.32	1975.08	1628.58	20.9306	16.6903	20.6545	22.5164	25.1568	21.991
LOC725581	band 3 anion transport protein	725581	22688.2	0.625812	0.323943	1.93186	0.0533769	0.321255	14957.9	41555	26087.1	20078.3	15825.4	17625.2	35.9049	110.139	60.6142	40.6354	31.2224	38.6737
LOC107964659	uncharacterized LOC107964659	107964659	36.1654	1.63713	0.847885	1.93084	0.053503	0.321821	85.9517	33.5204	44.814	3.50244	22.6401	26.564	0.394278	0.115072	0.108895	0	0.0179655	0.0557355
LOC552460	transmembrane protein 18	552460	6215.09	-0.205444	0.106418	-1.93054	0.0535399	0.321849	6035.98	5583.94	5698.85	7167.16	6536.51	6268.08	82.9205	73.238	71.2468	84.3729	81.8433	85.6174
LOC408280	cell surface glycoprotein 1	408280	87513.1	-0.387948	0.201077	-1.92935	0.0536874	0.322543	86673.4	72459.9	68316.9	119270	103667	74691.9	529.369	420.367	373.119	623.253	556.675	448.375
LOC725310	synaptobrevin-1	725310	10206.3	-0.249348	0.129277	-1.92878	0.053758	0.32258	9211.55	10478.8	8288.46	10763	11681.2	10814.6	212.066	227.079	171.667	212.053	240.235	238.393
LOC410894	chymotrypsin-1	410894	53.638	1.02253	0.530113	1.92888	0.0537452	0.32258	52.6551	89.3877	73.623	36.1919	48.5144	21.4555	0.588378	0.54631	0.379373	0.306668	0.519688	0.462417
LOC724214	gametogenetin-binding protein 2-like	724214	2749.47	-0.247142	0.12827	-1.92673	0.0540133	0.323842	2480.21	2536.38	2526.66	3198.9	3134.03	2620.64	12.533	12.1389	11.5711	13.797	14.2096	13.3685
LOC107965211	uncharacterized LOC107965211	107965211	58.0971	1.13791	0.590641	1.92657	0.0540329	0.323842	87.5004	46.5561	105.633	30.3545	56.0611	22.4772	0.212027	0.053617	0.194291	0.0430948	0.0754242	0.0259771
LOC107965310	leucine-rich PPR motif-containing protein, mitochondrial	107965310	226.789	-0.524574	0.272411	-1.92567	0.0541455	0.323936	226.107	140.599	190.993	261.516	273.837	267.683	1.73675	1.16554	1.19214	1.53979	1.87671	1.89295
LOC552731	uncharacterized protein DDB_G0290301	552731	6184.56	0.30207	0.156851	1.92585	0.0541234	0.323936	5848.59	6939.65	7701.61	5468.48	6157.02	4991.99	11.7397	13.563	14.6362	9.42377	11.0879	9.80537
LOC100578011	kinetochore protein ndc80	100578011	227.372	-0.458523	0.238064	-1.92605	0.0540979	0.323936	221.461	186.224	166.452	242.836	266.29	280.965	1.76323	1.46436	1.16724	1.64677	1.80919	2.17008
LOC410597	SET and MYND domain-containing protein 5	410597	1197	-0.283514	0.147275	-1.92507	0.0542207	0.324041	1204.1	1080.1	953.899	1295.9	1362.72	1285.29	16.3658	14.1902	11.4013	15.4045	17.1376	17.2623
LOC413501	protein Wnt-6	413501	588.259	0.653012	0.339334	1.92439	0.0543051	0.324041	638.056	1029.82	489.753	363.086	418.302	590.538	5.09941	7.64247	3.17089	2.10997	3.02437	4.45321
LOC100578665	uncharacterized LOC100578665	100578665	685.732	0.471999	0.245246	1.92459	0.0542804	0.324041	690.711	645.268	1055.26	621.099	559.533	542.519	0.440466	0.38616	0.58306	0.352114	0.355946	0.339157
LOC726903	uncharacterized LOC726903	726903	35.5286	2.14763	1.11593	1.92452	0.0542896	0.324041	54.2038	34.4515	85.3601	0	25.8744	13.282	0.224798	0.284948	0.189367	0.0898067	4.62645e-132	0.0336855
LOC102655337	uncharacterized LOC102655337	102655337	82.9676	0.656773	0.341626	1.92249	0.0545441	0.32425	86.7261	114.528	103.499	60.709	68.9983	63.3449	0.171322	0.198238	0.165155	0.103025	0.111548	0.137755
LOC107964899	uncharacterized LOC107964899	107964899	62.7698	2.02059	1.05112	1.92232	0.0545655	0.32425	149.448	145.255	7.469	5.8374	42.0458	26.564	0.492282	1.19337	1.66846	1.04917	0.565053	0.722534
LOC724457	uncharacterized LOC724457	724457	203.052	0.588719	0.306225	1.92251	0.0545421	0.32425	212.169	230.918	289.157	120.25	196.214	169.601	3.1751	3.44974	3.9244	1.49881	2.70664	2.54521
LOC408346	NKAP family protein CG6066	408346	2929.4	-0.271079	0.14102	-1.92228	0.054571	0.32425	2611.85	3008.46	2344.2	3103.16	3388.46	3120.25	43.4868	48.2953	36.2881	44.8046	52.5842	51.9101
LOC726757	replication protein A 14 kDa subunit	726757	2735.34	-0.318332	0.165589	-1.92242	0.0545526	0.32425	2841.05	2473.99	1987.82	3094.99	2977.71	3036.47	88.2661	74.3972	58.708	83.9862	86.5238	95.8647
LOC100577394	uncharacterized LOC100577394	100577394	360.007	0.381886	0.198773	1.92121	0.0547046	0.32457	404.205	399.451	418.264	333.899	339.601	264.618	2.73278	2.2975	2.63876	1.81475	2.00821	1.60214
LOC411365	beta-1,4-N-acetylgalactosaminyltransferase bre-4	411365	16156.3	0.360389	0.187569	1.92137	0.0546855	0.32457	17018.4	17380.3	20092.7	16725.3	10852.1	14868.7	90.1609	90.9101	96.8949	78.0591	52.3904	78.2107
LOC725452	uncharacterized LOC725452	725452	9152.22	-0.250619	0.130519	-1.92017	0.0548368	0.325162	8949.82	8159.42	7967.29	10638.1	10507.1	8691.54	141.43	122.965	112.273	143.878	151.386	132.194
LOC413714	ATP synthase mitochondrial F1 complex assembly factor 2	413714	1926.91	-0.193887	0.101023	-1.91923	0.0549546	0.325668	1849.12	1809.17	1733.88	2044.26	2097.98	2027.04	33.9193	30.4138	28.0878	34.266	35.1283	35.0585
LOC413755	attractin	413755	3162.99	0.282244	0.147132	1.9183	0.0550728	0.326127	3385.41	3862.29	3165.79	3210.57	2640.26	2713.62	11.3615	12.072	10.0319	9.49267	7.55622	8.92844
LOC551950	guanine nucleotide-binding protein subunit beta-2	551950	377.307	0.728632	0.379921	1.91785	0.0551297	0.326127	728.654	293.303	389.455	270.855	336.367	245.206	3.25255	1.79455	2.46038	1.55964	2.23824	1.68232
WRNexo	WRN exonuclease	726261	3234.35	-0.228961	0.119375	-1.91799	0.0551122	0.326127	3088.07	2951.66	2894.77	3435.89	3208.42	3827.26
LOC408960	protein slit	408960	1246.43	0.308874	0.161147	1.91672	0.0552731	0.32659	1312.51	1472.1	1352.96	1278.39	1089.96	972.651	1.04268	1.235	0.988505	0.775066	0.812186	0.745021
LOC551785	6-phosphogluconolactonase	551785	2501.41	-0.27808	0.145065	-1.91694	0.0552455	0.32659	2344.7	2079.2	2359.14	2736.57	3071.5	2417.32	33.1207	29.1733	30.269	35.8143	39.4279	34.9949
LOC100578966	toll-like receptor 6	100578966	210.091	0.459027	0.239742	1.91467	0.0555347	0.32775	233.076	254.196	242.209	207.811	163.871	159.384	1.57587	1.65321	1.38669	1.08965	0.902417	0.99833
LOC100578990	dynein intermediate chain 3, ciliary	100578990	269.74	0.5829	0.304815	1.91231	0.0558367	0.328951	278.762	363.138	328.636	210.146	282.462	155.297	0.854054	0.991221	0.800216	0.518442	0.714724	0.455816
LOC413998	lateral signaling target protein 2 homolog	413998	3813.21	0.308472	0.161384	1.91141	0.0559521	0.329438	3950.68	4391.17	4317.08	2769.26	3726.98	3724.07	4.72181	5.63287	6.15791	2.65223	3.8062	3.89889
LOC411404	nucleolar complex protein 4 homolog B	411404	3384.42	-0.236822	0.123937	-1.91082	0.0560274	0.329687	3248.36	2890.2	3182.86	3894.71	3316.23	3774.13	25.6407	21.7998	22.9184	25.9688	23.965	29.0286
LOC102656111	uncharacterized LOC102656111	102656111	1438.35	-0.427824	0.224068	-1.90934	0.0562176	0.330394	1549.45	1164.83	964.569	1469.86	1902.84	1578.52	0.702274	0.305885	0.494097	0.487354	0.686635	0.916017
LOC413569	tyrosine-protein phosphatase Lar	413569	5046.55	0.365359	0.191401	1.90887	0.0562793	0.330394	4682.43	5327.88	7036.87	4806.52	4544.18	3881.41	2.73552	3.40076	3.94409	2.28182	2.2393	2.23798
LOC726307	serine-rich adhesin for platelets	726307	4705.82	0.263871	0.138221	1.90906	0.056255	0.330394	4412.96	5515.97	5476.91	4456.27	4023.46	4349.35	10.7273	12.4569	11.8414	9.5178	9.01903	10.6246
LOC408286	2-oxoglutarate dehydrogenase, mitochondrial	408286	23912.7	0.280799	0.147092	1.909	0.0562618	0.330394	23381.2	26976.5	28340.6	22693.5	18507.7	23576.6	102.863	116.025	104.882	82.772	67.861	96.9074
LOC100577030	QRFP-like peptide receptor	100577030	5518.43	0.457691	0.239907	1.90778	0.056419	0.330726	6600.47	6508.54	6050.96	3774.46	3673.08	6503.07	29.1997	26.7754	23.7387	14.5883	14.9386	28.0022
LOC102656214	uncharacterized LOC102656214	102656214	147.093	-0.560251	0.293704	-1.90754	0.056451	0.330726	126.217	103.355	126.973	185.629	198.37	142.015	0.679599	0.524491	0.902161	1.08113	1.36778	1.02055
LOC550918	ATP-binding cassette sub-family G member 4	550918	9352.62	0.352081	0.184531	1.90798	0.0563944	0.330726	10828.4	12517.1	8118.81	7581.62	8307.82	8762.04	21.4318	27.3393	13.1952	9.52851	12.8565	14.678
LOC412526	protein disulfide-isomerase A6 homolog	412526	5291.54	-0.220494	0.115599	-1.90741	0.0564679	0.330726	5140.07	4656.54	4866.59	6047.55	5177.03	5861.45	48.2744	41.2743	41.3352	48.8233	43.7255	53.2284
LOC725754	zinc finger protein castor homolog 1	725754	4798.55	0.665167	0.348899	1.90647	0.0565889	0.331048	4877.57	5400.51	7379.38	1844.62	4120.49	5168.74	7.6384	7.87067	11.1601	2.06535	4.88711	7.58751
LOC113218631	uncharacterized LOC113218631	113218631	263.55	-0.701796	0.368067	-1.90671	0.0565585	0.331048	162.611	209.502	230.472	212.481	292.165	474.065	1.3479	1.53241	1.75582	1.37843	2.1902	3.84053
LOC726259	cytochrome c oxidase assembly protein COX16 homolog, mitochondrial	726259	574.602	-0.379216	0.198952	-1.90607	0.0566414	0.331145	581.529	460.905	455.609	565.06	685.67	698.838	64.8031	52.1236	48.7867	59.9913	69.6826	76.1181
LOC726620	transcription factor BTF3 homolog 4	726620	9752.76	-0.183059	0.0960763	-1.90535	0.0567349	0.331145	9261.11	8528.15	9615.81	10282	10237.6	10591.9	109.059	98.5247	103.806	104.887	110.78	125.121
LOC100577215	uncharacterized LOC100577215	100577215	87.4082	0.697134	0.365831	1.90562	0.0567	0.331145	110.731	84.7321	129.107	57.2065	71.1545	71.5185	0.509177	0.535862	0.719917	0.318309	0.463603	0.609742
LOC724750	ER membrane protein complex subunit 10	724750	6360.4	-0.199003	0.104445	-1.90533	0.0567375	0.331145	5932.99	5471.27	6363.59	6839.1	6847	6708.43	112.199	104.126	112.742	120.624	124.196	126.171
LOC727299	probable splicing factor, arginine/serine-rich 7	727299	3237.8	-0.211835	0.111205	-1.9049	0.0567934	0.331278	3164.73	3055.01	2780.6	3590	3306.53	3529.95	30.4192	28.2711	24.4863	29.8509	28.8235	33.2924
Mir9889	microRNA 9889	104796175	14236.5	0.332199	0.174491	1.90382	0.056934	0.331905	14946.3	17274.2	15385.1	12811.9	10055.4	14946.3	0	0	0	0	0	0
LOC102654210	uncharacterized LOC102654210	102654210	585.246	-0.686733	0.360831	-1.9032	0.0570146	0.332062	271.793	475.803	598.587	931.649	497.003	736.64	0.582397	0.941228	1.15471	1.62033	0.948116	1.73354
LOC410026	26S proteasome regulatory complex subunit p48A	410026	8344.14	-0.299291	0.157265	-1.9031	0.0570271	0.332062	8500.7	7788.84	6154.46	8598.49	9245.77	9776.58	100.501	88.8738	66.3457	87.137	99.0524	114.262
LOC409166	E3 ubiquitin-protein ligase TRIM23	409166	7422.65	-0.2748	0.144423	-1.90274	0.0570745	0.332145	6735.21	5751.54	7667.47	8410.53	7656.65	8314.53	37.0331	29.4714	36.2474	38.0474	37.2836	43.6078
LOC726248	protein artichoke	726248	546.374	-0.425518	0.223871	-1.90073	0.0573378	0.332216	487.834	466.492	444.939	525.366	563.845	789.768	1.54722	1.47038	1.29137	1.46476	1.72118	2.47737
LOC552850	catenin alpha	552850	2020.71	0.317778	0.167117	1.90153	0.0572323	0.332216	1837.51	2404.16	2486.11	1928.68	1760.53	1707.25	8.74124	11.439	11.1897	8.34672	7.7265	8.17216
LOC411481	ribosomal protein S6 kinase alpha-2	411481	1694.83	-0.263857	0.138796	-1.90104	0.0572971	0.332216	1515.38	1390.17	1715.74	1954.36	1816.6	1776.72	8.88067	7.55531	8.71929	9.3808	9.40817	9.67879
LOC725774	BLOC-1-related complex subunit 7	725774	239.56	0.436569	0.229514	1.90215	0.0571518	0.332216	279.537	257.921	289.157	193.802	236.103	180.84	8.40616	7.40198	10.4892	4.14066	7.62331	6.70211
LOC725233	uncharacterized LOC725233	725233	105.888	-0.762054	0.400793	-1.90136	0.0572543	0.332216	75.111	93.1122	67.221	176.289	133.684	89.9089	0.201967	0.241826	0.165552	0.403471	0.346674	0.226242
LOC411997	ATP-binding cassette sub-family G member 4	411997	6929.31	-0.384385	0.202242	-1.90062	0.0573518	0.332216	6639.19	6818.61	4576.37	7425.17	6959.12	9157.43	43.6479	42.3588	26.8938	41.9507	41.8626	61.9539
LOC408562	uncharacterized LOC408562	408562	6503.96	0.26752	0.140816	1.89979	0.0574602	0.332652	6298.48	7070.94	7947.02	6487.69	5534.96	5684.7	9.54101	10.2728	10.0078	7.50524	8.25855	8.43297
LOC408976	protein kinase shaggy	408976	23201.6	0.446134	0.234995	1.89848	0.0576326	0.333457	22783.4	29913.2	27585.2	26415.4	14706.3	17806.1	48.58	59.1788	51.3131	49.0787	27.8375	35.5646
LOC726683	myosin-VIIa	726683	9075.62	0.251602	0.132573	1.89784	0.0577166	0.333751	8698.93	9738.61	11158.7	8247.08	8645.27	7965.12	10.1347	10.8862	12.151	7.67941	9.22828	8.68631
LOC411192	ribosome biogenesis regulatory protein homolog	411192	1185.1	-0.272802	0.14378	-1.89736	0.0577801	0.333926	1128.21	1142.49	948.564	1333.26	1225.8	1332.29	15.2231	15.2908	12.0318	16.2272	15.8584	18.0765
SsRbeta	signal sequence receptor beta	724079	2273.98	-0.338854	0.178694	-1.89627	0.0579238	0.334563	2237.84	1573.6	2212.96	2538.1	2431.11	2650.27	9.22391	6.21472	8.14583	8.90385	9.19545	10.8524
LOC552707	protein CDV3 homolog	552707	4148.44	-0.180552	0.0952761	-1.89504	0.0580874	0.335001	3817.5	4059.69	3789.99	4555.51	4411.58	4256.37	16.3461	16.2927	14.2551	16.7573	16.8437	17.4644
LOC552784	uncharacterized LOC552784	552784	7085.12	0.551986	0.291408	1.89421	0.0581977	0.335001	6559.43	12845.8	5867.44	6091.91	5361.38	5784.82	22.5694	41.9438	18.5232	18.6131	17.2225	20.2287
LOC408576	potassium voltage-gated channel protein Shal	408576	15508.1	0.282689	0.149271	1.89379	0.0582531	0.335001	18652.3	18299.3	14115.4	13136.5	13991.6	14853.4	5.39974	4.68058	2.71445	3.91429	4.59868	3.74683
CPR17	cuticular protein 17	724556	263.626	-0.629854	0.332399	-1.89487	0.0581092	0.335001	253.983	239.298	126.973	309.382	356.85	295.269	4.00672	3.53156	1.82309	4.23958	5.21773	4.37026
LOC550886	atlastin	550886	26070	-0.260708	0.137594	-1.89477	0.058123	0.335001	26608.6	23054.6	21497.9	30093	25357.9	29807.9	136.374	111.47	98.1848	133.629	119.969	150.018
LOC552491	NADPH-dependent diflavin oxidoreductase 1	552491	5409.67	0.227169	0.119931	1.89417	0.0582027	0.335001	6065.4	5277.6	6160.86	5289.85	4688.65	4975.64	26.8387	23.4469	25.6596	21.6946	19.7413	21.9164
LOC100578669	uncharacterized LOC100578669	100578669	94.2887	-0.993383	0.524611	-1.89356	0.0582834	0.335001	100.664	32.5893	55.484	147.102	136.918	92.974	0.518486	0.14991	0.165552	0.655846	0.455257	0.414057
LOC550734	thioredoxin-like protein 1	550734	9258.92	-0.22327	0.117936	-1.89315	0.0583379	0.335026	9271.17	8747.89	7610.92	10233	10027.4	9663.17	107.33	97.2774	81.52	103.148	107.226	112.239
LOC724293	yellow-x1	724293	122556	0.286599	0.151412	1.89285	0.0583781	0.335064	132575	128826	142667	130544	94638.7	106085	181.424	192.689	202.669	149.022	104.739	137.36
LOC410806	histidine--tRNA ligase, cytoplasmic	410806	9302.48	-0.288977	0.152751	-1.89182	0.0585147	0.335464	7703.91	7553.26	9865.49	11024.5	10215	9452.7	55.0103	52.3472	62.8283	67.0798	67.2091	67.0401
LOC411808	proline dehydrogenase, mitochondrial	411808	4795.57	-0.419322	0.221827	-1.89031	0.058716	0.336426	4481.1	2881.82	4947.68	6107.09	5113.42	5242.3	17.3636	11.442	18.1683	20.8681	17.832	21.112
LOC551046	cys-loop ligand-gated ion channel subunit 12344	551046	63.0949	-2.50311	1.32435	-1.89006	0.0587501	0.336429	0	41.9005	14.938	170.452	137.997	13.282	0	0.448698	0.180661	1.92547	1.69009	0.184267
Msx	homeobox protein Msx	724456	237.83	-0.733243	0.388203	-1.88881	0.0589169	0.337017	195.908	192.742	147.246	169.285	419.38	302.421	1.03964	1.03657	0.775761	0.896552	2.1311	1.77225
LOC102654638	uncharacterized LOC102654638	102654638	1374.53	0.323368	0.171204	1.88878	0.0589211	0.337017	1461.18	1781.24	1341.22	1255.04	1100.74	1307.77	9.54105	11.1356	7.85509	7.03645	6.88207	8.30075
LOC413605	cytochrome c1, heme protein, mitochondrial	413605	11687.3	-0.228008	0.120757	-1.88815	0.0590063	0.337126	11066.1	11231.2	9998.86	13203	11298.5	13325.9	144.326	140.148	118.036	149.013	135.335	172.094
LOC102654417	uncharacterized LOC102654417	102654417	7760.53	0.376719	0.199622	1.88716	0.0591386	0.33769	8103.47	6994.59	11206.7	6753.87	7299.8	6204.74	22.5073	21.2591	31.6585	13.5635	17.0699	17.6324
Vhdl	larval-specific very high density lipoprotein	726182	796.976	1.05682	0.560459	1.88563	0.0593455	0.338485	1120.47	1780.31	328.636	307.047	819.354	426.046	3.56801	5.6979	1.01386	0.873178	2.45726	1.38515
LOC102655275	uncharacterized LOC102655275	102655275	3152.69	0.530417	0.281336	1.88535	0.0593825	0.338504	3010.63	4030.83	4136.76	1579.6	2959.38	3198.92	8.78549	12.6206	11.9104	4.3621	8.63913	9.09743
LOC410379	uncharacterized LOC410379	410379	2748.62	0.717361	0.380668	1.88448	0.0595005	0.338792	1872.35	2665.8	5716.99	2510.08	2038.68	1687.84	3.14281	4.5308	8.64988	3.86194	3.3662	3.06882
LOC100576829	serine/arginine repetitive matrix protein 2	100576829	2228.51	0.215846	0.114533	1.88457	0.059488	0.338792	2282.75	2378.09	2524.52	2029.08	2193.93	1962.67	11.5291	11.62	11.7443	9.03635	10.6165	9.97173
LOC102655835	uncharacterized LOC102655835	102655835	40.8332	1.44185	0.765266	1.88411	0.0595501	0.338881	32.5223	54.9362	91.7621	10.5073	40.9677	14.3037	0.208889	0.295513	0.535122	0.0604158	0.264005	0.0607082
LOC552549	ribosomal protein S6 kinase beta-1	552549	1210.92	0.299912	0.159292	1.88279	0.0597295	0.339709	1171.58	1293.33	1545.02	1093.93	1108.28	1053.37	6.10565	7.31677	7.56877	4.32043	5.022	5.84841
Nmdar1	NMDA receptor 1	406079	6069.47	-0.310856	0.165192	-1.88178	0.0598655	0.340119	5556.66	5329.74	5368.08	6439.82	5607.19	8115.3	12.8269	10.1329	11.3133	14.6269	12.0586	25.5712
LOC413340	NADH dehydrogenase [ubiquinone] 1 alpha subcomplex subunit 10, mitochondrial	413340	8450.36	-0.237012	0.125953	-1.88175	0.0598693	0.340119	6931.12	8269.29	8073.99	9451.92	8400.54	9575.3	83.847	95.945	89.0238	98.8385	93.3819	114.632
LOC100579055	multiple coagulation factor deficiency protein 2 homolog	100579055	47.6143	0.939649	0.499419	1.88149	0.0599059	0.340134	58.0755	54.9362	74.69	42.0293	34.4991	21.4555	1.33524	1.27817	1.82436	0.880194	0.5941	0.617826
LOC725456	sodium-dependent nutrient amino acid transporter 1	725456	14728.6	-0.447167	0.237777	-1.88062	0.0600237	0.340225	16387.4	12481.7	8522.13	16956.5	15480.4	18543.7	127.2	91.924	58.6448	111.893	111.839	141.035
LOC551746	transcriptional activator cubitus interruptus	551746	405.905	0.626205	0.332895	1.88109	0.0599599	0.340225	422.79	695.548	359.579	266.185	403.209	288.117	1.14383	1.88225	0.820659	0.549517	1.02422	0.741396
LOC550780	N-terminal Xaa-Pro-Lys N-methyltransferase 1	550780	4810.99	-0.291236	0.154855	-1.88071	0.060012	0.340225	4912.41	3843.67	4224.26	5029.5	5987.76	4868.37	79.1338	63.9248	61.2481	72.8708	86.6968	80.8084
LOC411665	heparan sulfate 2-O-sulfotransferase pipe	411665	2166.17	0.387188	0.205993	1.87961	0.0601608	0.340711	2397.36	2630.42	2337.8	1483.87	2392.3	1755.27	4.39275	4.87397	3.04634	2.72615	3.72389	4.10872
LOC551885	putative homeodomain transcription factor	551885	3483.56	0.296933	0.157986	1.87949	0.0601775	0.340711	3181.76	4015.93	4325.62	3174.38	3279.57	2924.08	18.9144	21.8279	22.2932	16.1608	17.7055	16.9784
LOC102654076	uncharacterized LOC102654076	102654076	3403.6	0.55455	0.295265	1.87814	0.0603615	0.341368	4620.49	5177.97	2350.6	2301.1	3176.08	2795.35	47.8532	48.9527	22.6599	20.2759	29.1454	27.8586
LOC409704	poly(A) polymerase type 3	409704	1143.52	-0.237548	0.126526	-1.87747	0.0604539	0.341698	1102.66	999.094	1046.73	1182.66	1313.12	1216.84	3.57014	3.16498	3.05869	3.38983	3.89247	4.02579
LOC102654528	uncharacterized LOC102654528	102654528	222.497	-0.542559	0.289048	-1.87706	0.0605102	0.341823	142.479	164.809	236.874	273.19	246.884	270.749	1.85689	1.62256	2.50612	2.58715	2.46929	2.85568
LOC408935	high-affinity choline transporter 1	408935	22.889	1.5379	0.819726	1.87612	0.0606393	0.341939	24.7789	46.5561	30.943	3.50244	17.2496	14.3037	0.0649768	0.105159	0.041419	0.00845218	0.0493104	0.0424573
LOC410475	tRNA pseudouridine(38/39) synthase	410475	355.548	-0.612965	0.326799	-1.87567	0.0607012	0.341939	334.515	222.538	285.956	492.677	520.721	276.879	3.71015	2.31794	3.08061	5.25713	6.01863	3.52225
LOC113218711	uncharacterized LOC113218711	113218711	37.5609	1.47809	0.78795	1.87587	0.0606733	0.341939	51.8808	81.9387	32.01	10.5073	38.8115	10.2169	0.236644	0.287356	0.151022	0.0461821	0.119696	0.0309331
LOC725704	uncharacterized LOC725704	725704	2490.16	0.214842	0.114532	1.87582	0.0606801	0.341939	2472.47	2761.71	2792.34	2283.59	2412.78	2218.09	4.58447	4.88105	4.79117	3.73694	4.14944	4.15364
LOC413256	uncharacterized LOC413256	413256	397.049	0.717962	0.382713	1.87598	0.0606579	0.341939	314.382	398.52	769.308	242.836	298.633	358.614	0.588812	0.690013	1.32816	0.442738	0.496726	0.70482
LOC412157	HEAT repeat-containing protein 5B	412157	2725.02	0.300788	0.160425	1.87494	0.060801	0.342117	2724.13	2807.33	3493.36	2678.2	2195.01	2452.06	6.16331	5.97552	7.17484	5.22443	4.48752	5.44304
LOC410860	battenin	410860	4655.49	0.445695	0.237705	1.87499	0.0607944	0.342117	4384.31	5802.75	5919.72	4646.57	4435.3	2744.27	7.16579	11.9946	11.2727	7.1099	7.05175	5.16069
LOC100577923	protein LLP homolog	100577923	1363.3	-0.294492	0.157124	-1.87427	0.0608937	0.342446	1343.48	1032.61	1297.47	1562.09	1476.99	1467.15	39.1218	29.0832	35.9115	40.2001	40.5317	42.1463
LOC410502	transformation/transcription domain-associated protein	410502	1815.46	0.20753	0.110806	1.87291	0.061081	0.342831	1907.2	2010.29	1919.53	1783.91	1666.74	1605.08	2.42412	2.44957	2.15853	1.95109	1.95265	1.97321
LOC410151	retinal homeobox protein Rx2	410151	1000.1	0.411599	0.220064	1.87036	0.061434	0.342831	1236.62	1011.2	1177.97	639.779	975.679	959.369	5.38344	4.25166	4.36395	2.54501	4.09364	4.30964
LOC100578437	ataxin-7-like protein 1	100578437	3179.52	-0.437695	0.233626	-1.87348	0.0610015	0.342831	2829.44	3191.89	2080.65	3488.43	4564.67	2922.04	5.32906	5.86842	3.4236	5.64502	7.73285	5.17376
LOC408742	fatty-acid amide hydrolase 2-B	408742	73960.5	-0.56477	0.301732	-1.87176	0.0612399	0.342831	86043.9	57600.1	35352.9	73875.8	86513.1	104377	524.225	328.323	194.098	385.253	481.661	635.806
LOC408791	1-phosphatidylinositol 4,5-bisphosphate phosphodiesterase classes I and II	408791	3663.87	0.257347	0.137577	1.87056	0.0614055	0.342831	4224.8	3711.45	4032.2	3682.23	3399.24	2933.28	1.91591	1.5383	1.77592	1.28648	1.41068	1.35478
LOC412966	pre-mRNA-splicing factor ISY1 homolog	412966	521.278	-0.35723	0.190943	-1.87087	0.0613631	0.342831	395.688	499.081	476.949	576.735	647.937	531.28	4.0581	5.09333	4.544	5.13479	6.45436	5.53116
Kr-h1	kruppel homolog 1	100576395	1048.18	0.769083	0.411138	1.87062	0.0613979	0.342831	1008.19	664.821	2290.85	735.512	780.543	809.181	2.65485	1.84845	5.85937	1.50801	1.8407	2.0797
GlnS	glutamine synthetase	410066	43601.7	0.344381	0.183927	1.87238	0.0611542	0.342831	37574.1	53731.3	55039.1	37082.7	35244.1	42938.7	468.994	637.663	615.309	395.693	397.292	528.197
LOC411959	fatty acid synthase	411959	310.619	-0.521814	0.27899	-1.87036	0.0614332	0.342831	217.59	295.166	252.879	279.028	364.397	454.653	0.370803	0.493186	0.427269	0.429461	0.54613	0.696959
LOC100577722	spindle and kinetochore-associated protein 1	100577722	4164.37	0.211264	0.112952	1.87039	0.0614302	0.342831	4188.4	4396.76	4821.78	4064	3684.94	3830.33	1.71008	1.78605	1.22508	1.70897	1.70683	0.675944
LOC725189	protein bric-a-brac 2	725189	18281	-0.214115	0.114391	-1.87178	0.0612373	0.342831	16827.2	16817	17137.1	17680.3	21637.4	19586.9	28.4949	27.2928	26.2573	25.8508	33.2965	32.4926
LOC552055	nardilysin	552055	4101.68	-0.543392	0.29023	-1.87228	0.0611678	0.342831	4279	2472.13	3262.89	5532.69	5915.52	3147.83	11.436	10.9717	13.688	12.5642	12.5409	13.5401
brp	bruchpilot	409012	200.593	0.558083	0.297942	1.87313	0.061051	0.342831	223.784	189.018	304.095	184.462	152.012	150.189	0.412024	0.354526	0.466908	0.29486	0.26544	0.231096
LOC100578641	uncharacterized LOC100578641	100578641	1997.18	-0.295408	0.157946	-1.87031	0.0614409	0.342831	2014.83	1501.9	1862.98	2221.71	2296.35	2085.27	2.32027	1.26365	1.68858	1.3233	2.92586	2.68888
LOC410467	uncharacterized LOC410467	410467	57.3062	1.07984	0.578277	1.86734	0.061854	0.342981	41.04	69.8342	122.705	38.5268	43.1239	28.6074	0.123795	0.185208	0.269275	0.0947272	0.110522	0.0761347
LOC102654608	homeobox protein ceh-19	102654608	38.365	2.15298	1.15216	1.86866	0.0616708	0.342981	31.7479	113.597	42.68	0	24.7963	17.3688	0.512984	1.60661	0.396256	0	0.388502	0.268687
LOC410780	sodium/hydrogen exchanger 9B2	410780	198464	0.545645	0.291939	1.86904	0.0616178	0.342981	169606	274351	262704	222113	105151	156858	630.654	944.098	844.03	725.62	355.041	559.902
LOC102653975	uncharacterized LOC102653975	102653975	137.106	0.717551	0.384269	1.86731	0.0618578	0.342981	151.771	216.951	142.978	93.3984	76.545	140.994	0.789482	0.969049	0.56115	0.369679	0.312998	0.73804
LOC409316	coronin-2B	409316	2910.95	0.490926	0.262926	1.86717	0.0618782	0.342981	2397.36	3028.94	4779.1	2239.23	2703.87	2317.2	9.28403	11.5858	16.9803	7.52988	8.34005	7.93625
LOC413900	WD repeat-containing protein on Y chromosome	413900	321.714	0.5077	0.271856	1.86753	0.0618272	0.342981	468.476	296.097	368.115	298.875	275.993	222.729	1.77222	1.09713	1.09436	0.903256	1.0726	0.865361
LOC100578995	vanin-like protein 1	100578995	33.7569	1.80381	0.965725	1.86783	0.0617859	0.342981	72.788	63.3163	21.34	3.50244	33.421	8.17354	0.562138	0.509261	0.156406	0.0318112	0.27799	0.0639313
LOC552568	hydroxyacylglutathione hydrolase, mitochondrial	552568	4406.98	-0.181771	0.0972769	-1.86859	0.0616793	0.342981	4329.33	3964.72	4094.08	4856.72	4662.77	4534.27	61.1631	55.5534	50.669	59.8794	59.0018	63.6787
LOC411392	protein Red	411392	11230.2	-0.339003	0.181414	-1.86867	0.0616681	0.342981	11541.5	8065.38	10142.9	13531.1	10653.8	13446.5	60.4228	40.7778	48.0691	62.8569	52.2018	69.611
LOC409006	arrestin red cell	409006	6737.87	-0.428177	0.229305	-1.86728	0.0618623	0.342981	4448.58	7417.32	5370.21	7874.65	8988.1	6328.36	8.01655	13.4911	8.94332	11.6599	13.4251	10.6213
Mrjp3	major royal jelly protein 3	406121	60.2009	-1.08486	0.581005	-1.86722	0.0618708	0.342981	57.3012	40.9694	17.072	75.8862	65.764	104.213	0.332279	0.207132	0.0654431	0.232883	0.419906	0.200586
LOC408914	BAI1-associated protein 3	408914	343.715	0.389372	0.208639	1.86625	0.0620069	0.343504	400.334	329.617	439.604	303.545	306.18	283.009	0.865608	0.700087	0.812025	0.59299	0.608194	0.563084
LOC409566	SWI/SNF-related matrix-associated actin-dependent regulator of chromatin subfamily B member 1	409566	2144.37	-0.192526	0.103213	-1.86534	0.0621343	0.34383	1979.99	2023.33	2001.69	2161.01	2351.33	2348.87	24.9292	24.2513	23.3537	24.0686	27.4866	29.0722
LOC102655284	serine--tRNA ligase	102655284	2429.4	-0.241582	0.1296	-1.86406	0.0623126	0.344437	2412.84	2148.1	2118	2477.39	2538.92	2881.17	20.3372	16.3621	15.8662	17.2768	19.119	22.974
LOC724517	la-related protein 1B	724517	3294.22	0.420534	0.225683	1.86338	0.0624085	0.344777	3086.52	3264.51	4962.62	2765.76	3225.67	2460.24	4.29185	4.30071	6.58341	3.34143	3.83717	3.23397
LOC413623	kelch-like protein diablo	413623	1726.45	0.309136	0.166005	1.8622	0.0625745	0.345123	1708.97	2139.72	1883.26	1751.22	1512.57	1362.94	10.5585	12.2016	10.4057	9.29292	8.21791	8.14207
LOC409887	transcription factor Dp-1	409887	4345.75	-0.199801	0.107276	-1.8625	0.0625321	0.345123	4324.69	4063.42	3746.24	4789	4605.63	4545.51	29.5528	26.0824	23.0173	28.0075	28.3818	30.5818
LOC409150	enoyl Coenzyme A hydratase, short chain, 1, mitochondrial	409150	27572.5	-0.295762	0.158811	-1.86235	0.0625532	0.345123	27794.9	26050.9	20421.3	27634.3	30334.4	33198.9	279.854	249.825	185.832	237.072	276.276	326.31
LOC551302	tRNA-specific adenosine deaminase 1	551302	2450.32	0.271489	0.145827	1.86173	0.0626415	0.345303	2646.69	2984.25	2409.29	2132.99	2451.59	2077.1	30.2312	33.4524	25.6893	20.6164	25.9967	22.5692
LOC552590	transmembrane protein 120 homolog	552590	3425.38	-0.207785	0.111639	-1.86123	0.0627115	0.345499	3413.29	2986.11	3136.98	3844.51	3517.83	3653.57	37.2217	32.0707	31.8033	36.2454	34.7442	39.4624
LOC102656326	stress response protein NST1	102656326	1206.93	-0.39633	0.213046	-1.8603	0.0628431	0.345979	966.376	1040.06	1120.35	1612.29	1023.12	1479.41	3.87171	3.47258	4.12033	5.25268	3.35919	4.74338
LOC113218938	uncharacterized LOC113218938	113218938	55.7798	0.832781	0.44776	1.85988	0.0629022	0.345979	74.3366	71.6964	68.288	44.3642	26.9525	49.0412	0.921188	0.896584	0.851189	0.38383	0.186163	0.482185
LOC100577672	probable serine/threonine-protein kinase DDB_G0283337	100577672	1141.61	0.260926	0.140279	1.86004	0.0628797	0.345979	1174.67	1223.49	1335.88	1118.45	951.961	1045.19	6.65644	6.75904	7.02973	5.59448	5.07697	5.92294
LOC552628	39S ribosomal protein L18, mitochondrial	552628	1730.63	-0.236489	0.127257	-1.85836	0.0631174	0.346973	1696.58	1554.97	1515.14	1873.81	1734.66	2008.65	39.1341	35.1504	33.0724	38.0819	39.2591	46.458
LOC408655	acidic fibroblast growth factor intracellular-binding protein	408655	5620.44	-0.200044	0.107667	-1.85799	0.0631703	0.347073	5141.62	4929.36	5624.16	6033.54	5727.93	6266.04	37.024	33.2494	35.1451	38.4908	38.5479	45.2393
LOC551119	pyridoxal phosphate homeostasis protein	551119	2277.66	0.418797	0.225574	1.85658	0.0633703	0.347982	2243.26	3483.33	2091.32	1835.28	1924.4	2088.34	36.3827	53.467	29.7364	25.4795	27.7563	32.3959
LOC100577378	galactokinase	100577378	2053.31	-0.26192	0.14113	-1.85588	0.0634704	0.348147	2086.85	1852.93	1661.32	2260.24	2106.6	2351.94	21.5336	18.5779	15.7325	20.7597	20.1857	24.0243
LOC409193	microtubule-associated serine/threonine-protein kinase 3	409193	5676.87	0.225009	0.121276	1.85535	0.0635469	0.348188	5498.59	6134.23	6724.24	5447.46	5095.09	5161.59	4.07669	5.77092	5.94343	4.03792	3.36983	4.00957
LOC410514	uncharacterized LOC410514	410514	1858.9	0.297615	0.160474	1.8546	0.0636538	0.348213	1814.28	2227.24	2108.39	1851.62	1698	1453.87	2.84339	3.50254	3.13539	2.42988	2.58109	2.01166
LOC410520	uncharacterized oxidoreductase YjmC	410520	155.223	0.648382	0.34965	1.85437	0.0636856	0.348213	131.638	199.26	237.941	131.925	130.45	100.126	0.833297	1.42345	1.54744	0.74877	0.827614	0.544816
Syt20	synaptotagmin 20	410052	20032.8	-0.20496	0.110544	-1.8541	0.0637248	0.348213	18486.6	17115.9	20234.6	22551	20975.5	20833.3	142.4	126.714	137.942	153.976	153.372	166.741
LOC100577959	uncharacterized LOC100577959	100577959	29.137	1.06017	0.571797	1.8541	0.0637249	0.348213	31.7479	43.7627	42.68	22.1821	14.0153	20.4339	0.0696639	0.161155	0.177915	0.0906409	0.0528494	0.0728559
LOC552245	N-acetyltransferase ESCO1	552245	138.507	-0.726275	0.391593	-1.85467	0.0636438	0.348213	150.222	94.9744	67.221	172.787	185.433	160.406	1.08577	0.809967	0.401429	1.28757	1.34171	1.42004
LOC409792	electroneutral sodium bicarbonate exchanger 1	409792	23027.6	0.423374	0.228602	1.85201	0.0640242	0.349467	22515.5	27064.9	29567.7	13563.8	22836.3	22617.2	51.4089	59.2584	59.2264	26.3423	46.2704	49.6043
LOC409995	sin3 histone deacetylase corepressor complex component SDS3	409995	1882.1	-0.212896	0.114944	-1.85218	0.0640004	0.349467	1801.89	1620.15	1808.57	1942.69	2086.12	2033.17	20.1745	17.749	18.0127	18.7259	21.4139	22.5638
LOC412394	alpha-L-fucosidase	412394	6553.77	-0.239759	0.129558	-1.8506	0.0642271	0.350206	5812.2	5443.34	6776.52	7467.2	7066.93	6756.45	46.272	42.8251	48.161	51.9957	51.3219	54.1167
LOC727049	NADH dehydrogenase [ubiquinone] 1 alpha subcomplex subunit 2	727049	1574.14	-0.303131	0.1639	-1.84948	0.0643882	0.35031	1509.96	1282.16	1436.18	1466.35	1866.19	1884	132.191	114.292	122.771	114.768	148.762	172.938
LOC102655792	uncharacterized LOC102655792	102655792	2184.77	0.69481	0.375608	1.84983	0.0643386	0.35031	2923.13	2436.75	2743.26	1203.67	958.429	2843.37	7.34043	6.54368	5.8937	7.49037	6.78747	6.82432
LOC725130	uncharacterized LOC725130	725130	1510.33	0.304638	0.164667	1.85002	0.0643105	0.35031	1640.05	1946.05	1421.24	1291.23	1381.04	1382.35	7.24421	8.04565	6.01807	4.83949	5.35445	5.87246
LOC100187599	uncharacterized LOC100187599	100187599	118.191	1.03595	0.560317	1.84887	0.064476	0.350597	212.169	161.084	103.499	30.3545	92.7164	109.321	16.0026	10.5382	9.35737	2.95687	10.2088	13.3887
LOC410227	inactive hydroxysteroid dehydrogenase-like protein 1	410227	96233.4	-0.188106	0.101792	-1.84794	0.0646111	0.351141	93590.6	92104.7	84208.8	107378	104188	95929.8	125.561	104.725	40.8765	106.742	92.6474	127.065
LOC551967	probable tubulin polyglutamylase TTLL2	551967	89153.2	0.240325	0.130074	1.84759	0.064661	0.351222	93229	108356	88100.1	84510.4	74587.1	86136.9	4.17879	3.24301	5.14099	3.8748	4.14968	4.34591
Tmem98	transmembrane protein 98	552393	3382.29	-0.380937	0.206312	-1.84641	0.0648321	0.351773	3650.24	2858.54	2304.72	4380.39	3576.05	3523.82	72.3308	54.751	40.1238	73.4849	62.9397	66.5776
LOC724212	60 kDa SS-A/Ro ribonucleoprotein	724212	575.023	0.404123	0.218944	1.84578	0.0649245	0.352081	574.56	678.788	711.689	603.587	464.66	416.851	3.77636	4.63287	4.82927	2.92725	3.18222	2.67148
LOC724560	fatty acyl-CoA reductase 1	724560	366.32	-1.18134	0.64019	-1.84529	0.0649952	0.352274	184.293	265.37	223.003	215.984	1122.3	186.97	1.85128	2.35767	2.09954	1.79007	10.0928	1.7988
LOC102655399	proteasome assembly chaperone 4	102655399	676.818	-0.26877	0.145714	-1.8445	0.0651103	0.352707	601.662	615.472	625.262	677.138	754.669	786.703	15.9913	15.1394	15.5742	15.9781	17.7683	20.5879
LOC410638	aromatic-L-amino-acid decarboxylase	410638	1148.58	-0.53053	0.287733	-1.84383	0.065208	0.353039	985.735	1178.8	654.071	1418.49	1660.27	994.107	4.07341	4.5076	2.23878	4.90717	6.11474	4.06314
LOC100577606	uncharacterized LOC100577606	100577606	935.927	-0.317002	0.171952	-1.84356	0.0652477	0.353039	824.672	924.604	751.168	918.807	1165.42	1030.89	10.5678	11.5567	8.26489	10.7091	13.7474	13.7787
LOC100578566	uncharacterized LOC100578566	100578566	393.575	0.723635	0.392564	1.84336	0.0652771	0.353039	681.419	545.637	243.276	282.53	344.991	263.597	9.64034	7.97782	3.64328	4.12624	4.57065	4.80567
LOC412944	VWFA and cache domain-containing protein 1	412944	1038.47	0.258216	0.140109	1.84297	0.0653334	0.353153	1160.74	1171.35	1060.6	1035.55	885.118	917.48	4.2313	4.22127	3.50669	3.52144	3.02955	3.32108
LOC107965241	uncharacterized LOC107965241	107965241	50.071	0.947323	0.514291	1.842	0.0654756	0.353517	62.7215	67.0408	68.288	22.1821	29.1086	51.0846	1.10914	0.816965	0.908627	0.166726	0.484156	0.726903
LOC409904	uncharacterized LOC409904	409904	20669.4	0.185529	0.100733	1.84178	0.0655067	0.353517	20337.3	23464.3	22189.3	19191	18923.9	19910.7	40.4181	43.5596	38.8279	33.1529	34.2083	39.5432
LOC100576544	arginine-hydroxylase NDUFAF5, mitochondrial	100576544	2261.14	-0.208039	0.112974	-1.84148	0.0655514	0.353569	2223.9	1978.63	2092.39	2327.96	2402	2541.97	30.9284	28.0165	27.7692	31.203	32.3249	37.3163
LOC725850	cysteine-rich PDZ-binding protein	725850	590.426	0.348662	0.189379	1.84108	0.0656092	0.35369	744.915	567.984	671.143	526.534	470.051	561.931	29.4205	22.5958	25.0078	19.8077	17.3097	22.6444
LOC410754	post-GPI attachment to proteins factor 2-like	410754	2035.21	-0.184438	0.100204	-1.84062	0.0656771	0.353866	1928.88	1834.31	1952.61	2206.54	2164.82	2124.1	1.88071	1.92713	2.53991	1.84923	1.96586	2.22913
LOC412391	transient receptor potential cation channel, subfamily M, member 3	412391	2305.53	0.272567	0.148168	1.83958	0.0658294	0.354496	2573.91	2324.08	2670.7	1933.35	1937.34	2393.83	2.61238	2.40807	3.06817	2.16239	1.8631	3.12245
LOC100578680	uncharacterized LOC100578680	100578680	5132.55	0.307034	0.166934	1.83925	0.0658782	0.354568	4538.41	6405.19	6087.24	4515.81	4867.61	4381.02	12.0745	16.5003	14.7753	10.1215	11.3306	11.5978
LOC102653841	uncharacterized LOC102653841	102653841	115.454	0.824556	0.448546	1.83829	0.0660203	0.355143	177.324	88.4566	177.122	57.2065	88.404	104.213	1.25634	0.537237	1.06402	0.377462	0.587117	0.783827
LOC552804	tubulin-specific chaperone cofactor E-like protein	552804	25705.5	0.277598	0.151072	1.83752	0.0661326	0.355556	23488.1	30926.3	30100.1	21112.7	24099.8	24506.3	90.3414	113.221	103.131	69.6895	83.8702	92.097
LOC726497	autophagy-related protein 2 homolog B	726497	5648.1	0.199665	0.108706	1.83676	0.066246	0.355784	5582.22	6254.35	6279.3	5175.44	5552.2	5045.12	12.0611	12.8073	12.3361	9.59141	10.977	10.6594
LOC113219345	voltage-dependent calcium channel subunit alpha-2/delta-3-like	113219345	727.753	0.589764	0.321309	1.8355	0.0664311	0.356206	734.074	1096.86	792.782	531.203	388.115	823.484	2.96889	4.20854	2.85427	1.83232	1.42478	3.32841
LOC551544	peroxidase	551544	598.95	-0.755226	0.411413	-1.83569	0.0664035	0.356206	406.528	406.9	523.897	666.631	370.866	1218.88	2.97419	2.60611	2.85296	3.95363	2.22871	8.33429
LOC102655130	leukocyte surface antigen CD53-like	102655130	20.6729	1.31207	0.715046	1.83494	0.0665147	0.356455	38.717	25.1403	24.541	8.17236	17.2496	10.2169	0.315551	0.495209	0.203181	0.0685144	0.199137	0.0688691
LOC725422	box A-binding factor	725422	4279.5	1.81057	0.98697	1.83447	0.0665843	0.356455	1345.03	8520.7	10115.2	2440.03	2752.38	503.694	0.272397	1.07057	16.7634	4.60216	5.2611	0.249802
LOC726204	transcription factor cwo	726204	7196.12	0.518205	0.282577	1.83385	0.0666761	0.356522	4956.55	9099.86	11368.9	5363.4	6111.74	6276.26	30.2683	49.2577	58.7473	27.0847	33.4173	35.9138
LOC725081	segmentation protein cap'n'collar	725081	16407.4	0.241479	0.131681	1.83382	0.0666807	0.356522	16270.4	20476.3	16585.5	15282.3	14501.5	15328.5	51.8758	62.0069	47.3257	43.2745	44.7167	48.7509
LOC113219042	uncharacterized LOC113219042	113219042	784.543	0.256088	0.139659	1.83367	0.0667034	0.356522	854.871	885.497	821.591	673.636	769.762	701.903	2.91712	2.93081	2.47893	1.90756	2.41962	2.14279
LOC107964909	uncharacterized LOC107964909	107964909	83.3051	1.49552	0.815949	1.83286	0.0668235	0.356974	22.4559	118.252	228.338	64.2114	22.6401	43.9328	0.596583	3.42314	7.28578	2.02207	0.627935	1.43523
LOC413880	peroxisomal targeting signal 1 receptor	413880	5183.03	-0.181892	0.0992683	-1.83233	0.0669021	0.357203	5003.01	4888.39	4677.73	5808.21	5217.99	5502.84	33.5104	31.309	27.8624	33.1094	31.8282	36.3341
LOC409604	nostrin	409604	10130.8	0.401323	0.219087	1.8318	0.0669819	0.357439	8997.06	13320.6	12274.8	10981.3	7749.37	7461.42	37.8677	49.7354	50.3923	43.5631	33.7687	33.4469
LOC410744	glucose dehydrogenase [FAD, quinone]	410744	2660.21	0.270879	0.147909	1.83139	0.0670421	0.35757	3016.05	2526.13	3186.06	2231.05	2377.21	2624.73	2.22276	2.33666	1.57422	0.719481	1.66769	1.98786
Dsx	doublesex	725126	1827.82	0.473385	0.258618	1.83044	0.0671839	0.358135	1547.13	1859.45	2969.46	1414.99	1630.08	1545.82	2.10351	2.83247	4.44486	1.64515	2.24554	1.94357
LOC102655673	mitochondrial import inner membrane translocase subunit Tim16	102655673	4284.75	-0.175191	0.0957532	-1.82961	0.067308	0.358467	3992.5	4169.56	3912.69	4371.05	4745.79	4516.9	49.9708	47.7347	51.6227	50.3379	53.7088	57.3713
Pcl	polycomblike	406080	187.895	-0.572344	0.312834	-1.82955	0.0673175	0.358467	137.833	171.326	144.045	260.348	254.431	159.384	0.648237	0.806163	0.621135	1.49798	1.18871	0.868697
LOC100576172	uncharacterized LOC100576172	100576172	6966.02	0.40289	0.220304	1.82879	0.0674306	0.358878	9065.2	8234.84	6496.97	5698.47	4696.19	7604.46	1.63364	1.11478	0.672755	0.493677	0.737183	0.839554
LOC724860	probable cytochrome P450 301a1, mitochondrial	724860	34.414	1.33281	0.729466	1.82711	0.0676836	0.359843	61.1729	64.2474	22.407	9.33984	24.7963	24.5206	0.323993	0.579843	0.0754773	0.0383424	0.148859	0.192653
LOC726537	probable ATP-dependent RNA helicase DDX27	726537	1156.39	-0.272641	0.149298	-1.82615	0.0678278	0.360418	1052.33	958.125	1132.09	1264.38	1379.97	1151.45	5.31989	4.69608	5.40764	5.574	6.35418	6.21034
LOC408328	elongation factor Tu, mitochondrial	408328	27065.4	-0.182775	0.100106	-1.82581	0.0678784	0.360496	24405.6	26436.4	25217.5	30733.9	27011.7	28587	189.39	196.915	178.341	206.13	190.894	220.268
LOC100577047	uncharacterized LOC100577047	100577047	939.897	0.393369	0.215597	1.82456	0.0680681	0.360784	1066.27	914.362	1221.72	644.449	947.648	844.94	2.30381	1.90531	2.37892	1.17297	2.0311	1.38121
LOC100577042	uncharacterized LOC100577042	100577042	209.112	0.813452	0.445802	1.82469	0.0680472	0.360784	266.373	155.497	377.718	196.137	164.949	93.9957	2.43164	1.33634	3.17515	1.66239	1.42788	0.803107
LOC409201	acyl-protein thioesterase 1	409201	4374.3	-0.194113	0.106392	-1.8245	0.0680765	0.360784	4378.89	3904.19	3957.51	4601.04	4520.46	4883.69	57.4331	53.1518	48.8749	57.2703	53.3595	66.1643
LOC411881	peregrin	411881	1278.29	0.223353	0.1225	1.8233	0.0682581	0.361555	1403.1	1304.5	1423.38	1239.86	1114.75	1184.14	6.58318	5.58213	5.84984	4.89233	4.79437	5.45277
LOC408607	SEC23-interacting protein	408607	31981.2	0.314994	0.172875	1.82209	0.0684411	0.361951	31352.2	43472.2	31552.3	25883	28444.5	31183.1	91.5925	120.49	82.7535	64.2757	75.0512	88.7908
LOC411124	phosphoinositide 3-kinase adapter protein 1	411124	19047.4	-0.416216	0.228414	-1.8222	0.0684251	0.361951	16631.3	20972.6	11351.8	19694.2	23682.6	21952.1	3.52331	3.77769	7.75251	3.68035	3.97963	2.80583
LOC551991	uncharacterized LOC551991	551991	40.3502	1.00479	0.552371	1.81905	0.0689033	0.362947	65.8189	60.5229	35.211	21.0146	24.7963	34.7375	0.308273	0.356745	0.147565	0.0943872	0.13754	0.21339
LOC410482	adenylosuccinate lyase	410482	15775	-0.664021	0.365057	-1.81895	0.068919	0.362947	8304.02	8614.74	19704.3	24455.2	20839.6	12732.3	40.7815	40.2479	86.4578	96.5518	88.2366	59.8678
LOC727135	uncharacterized LOC727135	727135	4436.68	0.311815	0.171391	1.81932	0.0688623	0.362947	4052.9	4842.77	5848.23	3934.41	4260.64	3681.16	16.149	18.6132	21.1419	13.6738	15.5487	14.3007
LOC725418	replication protein A 32 kDa subunit	725418	1198.31	-0.331263	0.182056	-1.81957	0.0688245	0.362947	1266.05	894.808	1022.19	1436	1274.31	1296.53	11.6124	8.89475	9.43255	14.6013	11.8689	11.0274
LOC409734	nuclear pore glycoprotein p62	409734	1653.18	-0.290019	0.159392	-1.81953	0.0688305	0.362947	1507.64	1652.74	1301.74	1753.56	2026.82	1676.6	15.284	16.1004	12.2046	15.3344	18.6264	17.2415
LOC725324	uncharacterized LOC725324	725324	7000.39	0.145426	0.0799453	1.81907	0.0689005	0.362947	7517.29	7283.24	7257.74	6605.6	6703.61	6634.87	5.8819	5.53337	3.35821	4.11543	4.84464	5.44888
E74	ecdysteroid-regulated gene E74	408758	2900.38	0.286989	0.157813	1.81854	0.0689811	0.363083	2812.4	3634.17	3117.78	2583.63	2357.8	2896.5	6.71507	8.22673	6.45853	5.15173	4.83784	6.74083
LOC413556	putative sodium-dependent multivitamin transporter	413556	2478.19	0.372989	0.205162	1.81802	0.0690616	0.363316	2178.99	3365.07	2846.76	2299.94	1848.94	2329.46	13.8154	20.1563	16.5416	12.6358	10.8896	14.8895
LOC408841	voltage-dependent calcium channel subunit alpha-2/delta-3	408841	261.455	0.498624	0.274311	1.81773	0.0691055	0.363357	302.767	305.408	310.497	231.161	156.324	262.575	0.684721	0.759606	0.630582	0.548477	0.374815	0.612121
LOC100578207	pickpocket protein 19	100578207	109.693	0.723602	0.398255	1.81693	0.0692277	0.363808	145.576	133.15	131.241	84.0586	51.7487	112.386	0.919621	0.920711	0.795344	0.549955	0.376923	0.845194
LOC408293	exostosin-1	408293	6850.87	0.228854	0.125982	1.81655	0.0692857	0.363922	6696.49	7941.54	7541.56	6631.29	6548.37	5746	7.10097	7.6072	7.9445	7.11029	6.97625	7.37811
LOC551589	beta-1,3-galactosyltransferase brn	551589	752.441	-0.329665	0.181565	-1.81568	0.0694191	0.364432	689.163	709.515	601.788	707.493	885.118	921.567	7.39247	7.35272	5.84395	6.94596	9.22719	9.59276
LOC107964817	uncharacterized LOC107964817	107964817	92.5728	0.6252	0.344391	1.81538	0.0694661	0.364475	133.186	103.355	100.298	63.0439	83.0135	72.5402	0.466542	0.330274	0.327956	0.21057	0.288985	0.24889
LOC410257	cysteine protease ATG4D	410257	1292.44	0.327705	0.180538	1.81516	0.0694999	0.364475	1459.63	1275.64	1580.23	1316.92	1155.72	966.521	7.70985	6.59501	7.23791	5.58624	5.88181	4.54306
LOC724747	otoferlin	724747	4318.58	0.292792	0.161386	1.81424	0.0696405	0.36483	4136.52	5225.46	4905	3308.64	4234.77	4101.07	9.73565	11.7192	10.3282	6.70844	9.17514	9.53485
LOC408869	lissencephaly-1 homolog	408869	19262.8	-0.263924	0.145466	-1.81433	0.0696266	0.36483	19192.8	18887.8	14435.5	20509.1	21254.7	21297.2	97.2874	91.5558	65.7001	89.1489	97.9353	106.161
LOC552761	probable G-protein coupled receptor B0563.6	552761	639.608	0.521503	0.287818	1.81192	0.0699986	0.366324	809.96	738.38	713.823	433.135	392.428	749.922	3.14805	2.47163	2.48487	1.50967	1.12749	2.23377
LOC100576444	chymotrypsin inhibitor	100576444	11729.1	1.68768	0.931864	1.81108	0.0701292	0.366816	2429.1	33006.4	18268.1	3918.06	6561.3	6191.46	187.746	2442.11	1367.98	259.136	463.91	497.392
LOC413248	uncharacterized LOC413248	413248	1803.22	0.419489	0.23168	1.81064	0.0701971	0.366823	1446.47	2214.21	2530.93	1430.16	1673.21	1524.37	4.21516	6.30741	6.61269	3.52118	4.17828	4.47247
LOC100578128	uncharacterized LOC100578128	100578128	192.292	1.00283	0.554083	1.80989	0.070313	0.367202	102.213	359.413	308.363	70.0488	176.808	136.907	0.70327	2.47274	2.23436	0.440747	1.25078	0.987996
LOC725031	elongation of very long chain fatty acids protein 6	725031	14849.4	-0.266953	0.147614	-1.80845	0.0705358	0.368174	15094.2	12449.1	12894.7	14586.5	15553.7	18518.2	9.14159	9.62874	13.7568	9.23802	6.38973	10.1915
LOC551868	kelch-like protein 5	551868	413.276	-0.567854	0.314465	-1.80578	0.0709528	0.36884	384.073	383.622	230.472	621.099	490.535	369.853	2.576	2.49348	1.37777	3.46606	3.09549	2.41715
Mir6042	microRNA 6042	104796781	8322.14	0.409631	0.226848	1.80575	0.0709576	0.36884	8294.73	11068.2	9124.99	5066.86	7757.99	8620.02
LOC724215	DNA topoisomerase 2	724215	2239.22	0.292317	0.161821	1.80643	0.0708518	0.36884	2185.96	2314.77	2895.84	2180.85	1971.84	1886.04	5.91237	6.24986	7.51405	5.29878	4.86152	5.12475
LOC552782	dentin sialophosphoprotein	552782	3325.79	0.318474	0.176359	1.80583	0.0709444	0.36884	3414.06	4089.49	3570.18	3357.67	3144.81	2378.5	10.2338	11.923	10.3229	8.85885	8.93552	6.77236
LOC413844	ATP-binding cassette sub-family G member 5	413844	1248.19	-0.465779	0.257928	-1.80585	0.0709417	0.36884	1204.1	1079.17	861.07	1888.98	1399.37	1056.43	6.32026	5.59749	4.14767	8.81862	6.95441	5.79027
LOC414027	N-alpha-acetyltransferase 20	414027	3117.39	-0.241878	0.133869	-1.80682	0.0707903	0.36884	2803.11	2606.21	3161.52	3428.89	3110.31	3594.31	50.2311	46.0284	51.6745	54.0498	51.5682	65.6842
LOC100578006	inorganic pyrophosphatase	100578006	4981.4	-0.21881	0.1212	-1.80536	0.0710177	0.368961	4535.31	5014.09	4263.73	4994.48	5380.79	5700.02	48.4244	50.8492	40.5767	45.0493	52.6101	60.1801
LOC102656747	uncharacterized LOC102656747	102656747	28.6584	1.21052	0.670688	1.80489	0.0710914	0.369152	48.0091	25.1403	46.948	11.6748	25.8744	14.3037	0.344807	0.3999	0.732885	0.210574	0.339989	0.257977
LOC113218744	uncharacterized LOC113218744	113218744	3686.7	-0.433128	0.240273	-1.80265	0.0714432	0.370212	4040.51	2743.09	2628.02	3260.77	4358.75	5089.05	8.66365	7.64894	7.39926	7.6325	7.92857	11.9088
LOC113218881	uncharacterized LOC113218881	113218881	1292.46	0.472163	0.261867	1.80307	0.0713779	0.370212	1233.52	1911.59	1361.49	837.083	1384.28	1026.8	0.997075	0	0	0	0	0
LOC412976	brachyury protein	412976	8053.22	-0.24677	0.136953	-1.80186	0.0715668	0.370279	8056.23	7592.37	6448.95	8159.52	8548.24	9514	41.3309	36.4659	30.0837	35.5381	38.3216	45.8711
LOC724670	E3 ubiquitin-protein ligase RBBP6	724670	3409.8	-0.224189	0.124413	-1.80197	0.0715495	0.370279	3481.43	2979.59	2973.73	3789.64	3784.12	3450.26	8.01587	6.45576	6.25072	7.35502	7.96074	7.76072
LOC410417	receptor-type tyrosine-protein phosphatase kappa	410417	135.168	0.886464	0.492464	1.80006	0.071851	0.370332	154.094	181.569	190.993	39.6943	106.732	137.929	0.323453	0.36472	0.271145	0.0721348	0.208514	0.217417
LOC551861	ATP synthase subunit e, mitochondrial	551861	8701.32	-0.213562	0.118651	-1.79992	0.0718726	0.370332	7855.68	7984.37	8336.48	8384.84	9381.61	10264.9	701.426	712.72	709.433	663.653	770.165	957.332
LOC102653954	uncharacterized LOC102653954	102653954	399.914	0.452082	0.251027	1.80093	0.0717144	0.370332	476.993	354.757	554.84	291.87	365.475	355.549	5.13658	5.37138	6.86421	3.54765	4.50851	4.88877
LOC727423	uncharacterized LOC727423	727423	3268.79	0.423049	0.234916	1.80085	0.0717266	0.370332	3029.99	5082.06	3122.04	2562.62	3135.11	2680.92	25.0853	41.3797	22.4205	18.723	22.8543	20.5476
LOC100576863	uncharacterized LOC100576863	100576863	153.998	-0.727509	0.404125	-1.80021	0.0718282	0.370332	109.182	135.013	103.499	275.525	183.277	117.495	1.35456	1.74678	1.14405	2.88483	2.05998	1.4508
LOC552027	heterogeneous nuclear ribonucleoprotein A1, A2/B1 homolog	552027	13484.1	-0.207567	0.115304	-1.80017	0.0718336	0.370332	12250.1	11504.9	13793.1	14776.8	13741.4	14838	89.5089	81.6374	89.8508	91.3246	90.9652	105.028
LOC412508	nucleoprotein TPR	412508	6046.21	-0.176899	0.0982391	-1.80069	0.071751	0.370332	5528.01	5768.3	5731.93	6682.66	5986.68	6579.7	11.1447	11.1151	10.3465	11.6016	10.8829	13.1042
LOC100576401	uncharacterized LOC100576401	100576401	1978.82	-0.304329	0.169268	-1.79791	0.0721916	0.371785	2026.45	1837.1	1447.92	2067.61	2312.52	2181.31	48.5707	43.2644	31.634	43.7714	50.0077	51.295
LOC726240	globin-1	726240	207.374	0.715628	0.398323	1.7966	0.0723987	0.372384	147.125	351.033	275.286	185.629	158.48	126.69	1.39444	2.69107	2.14881	1.4813	1.14013	1.18371
LOC412426	ubiquinone biosynthesis monooxygenase COQ6, mitochondrial	412426	5388.03	-0.1705	0.0949165	-1.79631	0.0724449	0.372384	4881.44	5221.73	5107.73	5614.41	5518.78	5984.05	16.7657	17.9087	17.6122	16.1333	16.1599	23.4348
LOC552561	inactive ubiquitin carboxyl-terminal hydrolase MINDY-4B	552561	99.7151	0.583845	0.325037	1.79624	0.0724565	0.372384	96.7925	133.15	129.107	82.8911	78.7012	77.6486	0.478029	0.617767	0.584012	0.395292	0.393885	0.368489
LOC413943	eukaryotic peptide chain release factor GTP-binding subunit ERF3A	413943	14277.6	-0.216477	0.120501	-1.79648	0.0724187	0.372384	12469.2	12305.7	14851.6	15978.1	15094.5	14966.8	54.5316	51.7188	57.3689	63.1482	62.2383	65.2347
LOC410748	glucose dehydrogenase [FAD, quinone]	410748	565.346	0.405109	0.225667	1.79516	0.0726276	0.372838	488.608	710.446	734.096	511.356	497.003	450.566	2.22062	3.14762	2.90471	2.00847	1.98586	2.0174
LOC100576760	uncharacterized LOC100576760	100576760	1971.28	-0.316022	0.176058	-1.79498	0.0726564	0.372838	1754.65	1509.35	2004.89	2493.74	1927.64	2137.38	10.1108	8.06916	10.4437	11.3199	9.2198	11.0437
LOC725101	uncharacterized LOC725101	725101	2126.79	0.199811	0.111368	1.79416	0.0727882	0.373219	2443.82	2163.93	2212.96	1959.03	2020.36	1960.63	19.5465	17.3418	14.9277	13.5655	15.2908	15.5419
LOC408875	heat shock protein beta-1	408875	47017.2	0.260191	0.145042	1.7939	0.0728296	0.373219	56104.8	55077.7	42553.1	42443.7	45027.8	40896.3	392.228	361.038	264.949	252.517	282.737	277.538
LOC412885	protein N-terminal asparagine amidohydrolase	412885	10071.6	0.282093	0.157258	1.79382	0.0728423	0.373219	9295.18	13181	10683.9	9001.27	9307.22	8961.27	48.9102	68.7641	51.7647	41.7227	45.1026	47.3066
LOC410688	RNA-binding protein 5	410688	4982.81	0.177972	0.099306	1.79216	0.0731078	0.373244	5130	5190.07	5549.47	4896.41	4668.16	4462.75	20.4445	19.6936	20.0277	16.872	17.0808	17.8438
LOC408686	sequestosome-1	408686	21191	-0.242268	0.13508	-1.79352	0.0728905	0.373244	19857.9	21336.7	17051.7	24668.9	23247	20983.5	218.928	223.947	169.115	231.651	232.74	226.584
LOC551485	uncharacterized LOC551485	551485	3438.96	0.195866	0.10928	1.79233	0.0730801	0.373244	3573.58	3674.21	3768.65	3148.69	3461.77	3006.84	14.7743	15.908	14.5842	11.6231	12.9644	12.6337
LOC411930	uncharacterized LOC411930	411930	1433.05	0.228397	0.127402	1.79273	0.073016	0.373244	1532.42	1604.32	1502.34	1202.5	1410.15	1346.59	3.37575	3.26181	2.98455	2.13206	2.73282	2.46172
LOC724169	transcription factor kayak	724169	16482.1	0.337875	0.188508	1.79237	0.0730739	0.373244	19337.6	19870.1	16001.8	15646.6	11247.8	16788.5	99.5302	91.0186	67.0998	65.2628	52.4307	79.5821
LOC411144	transcription initiation factor TFIID subunit 11	411144	1383.88	-0.208343	0.116244	-1.7923	0.0730849	0.373244	1316.38	1256.08	1279.33	1578.43	1426.32	1446.72	23.5448	21.2418	19.5876	24.4542	23.1795	26.2872
LOC726212	25S rRNA (cytosine-C(5))-methyltransferase nop2	726212	834.169	-0.373612	0.208406	-1.79271	0.0730191	0.373244	884.296	697.41	597.52	981.851	835.526	1008.41	6.08347	4.58457	3.70302	5.95868	5.33943	6.67146
LOC113218780	uncharacterized LOC113218780	113218780	41.6247	1.24245	0.693499	1.79157	0.0732019	0.373535	93.6951	24.2092	57.618	22.1821	18.3277	33.7159	0	0.0726206	0.0807306	0.326068	0	0.163897
LOC409978	proteasome subunit beta type-2	409978	6657.39	-0.308817	0.172408	-1.7912	0.0732614	0.373648	6885.43	6302.76	4653.19	7218.53	7271.77	7612.63	181.338	159.381	112.602	163.831	174.538	197.288
LOC725653	pseudouridine-5'-phosphatase	725653	3255.87	-0.178552	0.0997473	-1.79004	0.0734467	0.374212	2964.95	2964.69	3235.15	3465.08	3529.69	3375.67	58.1121	55.6724	58.3024	63.0231	65.1768	65.8252
LOC409976	transmembrane emp24 domain-containing protein 5	409976	2625.35	-0.238522	0.133234	-1.79024	0.0734151	0.374212	2564.61	2300.8	2360.21	2904.69	3094.14	2527.67	39.3603	33.6412	32.9827	37.6898	42.186	36.7437
LOC551947	WD repeat and FYVE domain-containing protein 3	551947	1082.86	0.399266	0.223152	1.78921	0.0735807	0.374419	928.434	1215.11	1552.49	990.023	910.993	900.111	1.07981	1.3328	1.60908	1.03095	0.944921	1.00574
LOC413356	UDP-glucose 6-dehydrogenase	413356	3470.95	-0.326954	0.182721	-1.78936	0.073557	0.374419	2609.53	3020.56	3608.6	4511.14	3546.94	3528.93	12.9748	14.5206	15.9252	19.4253	16.1684	16.9643
LOC113218963	uncharacterized LOC113218963	113218963	51.2502	-1.01036	0.564732	-1.7891	0.0735993	0.374419	21.6815	55.8673	24.541	64.2114	62.5297	78.6703	0.09695	0.0562169	0.187107	0.568285	0.367167	0.3808
LOC100578696	uncharacterized LOC100578696	100578696	6583.83	0.546028	0.305339	1.78827	0.0737322	0.374785	5886.53	5368.85	12190.5	5809.38	5060.59	5187.13	20.0561	17.4623	37.5624	17.1625	15.6337	17.644
LOC413410	IQ motif and SEC7 domain-containing protein 2	413410	4660.44	0.368535	0.206094	1.78819	0.0737459	0.374785	3874.8	5452.65	6430.81	4379.22	4042.87	3782.31	12.1519	16.6731	18.0416	12.1987	11.2289	11.8844
LOC408844	dual specificity protein phosphatase 10	408844	25342.8	0.336972	0.188523	1.78744	0.0738672	0.375051	22808.2	30158.1	31902.3	19123.3	21642.8	26422	58.2395	73.4216	72.7631	41.8123	50.4089	66.3783
Mir6005	microRNA 6005	104796774	7571.89	0.245827	0.137533	1.7874	0.0738732	0.375051	7096.05	9273.04	8277.79	7066.76	7097.12	6620.57	0	0	0	0	0	0	0	0	0	0
LOC551799	putative mediator of RNA polymerase II transcription subunit 26	551799	32872.1	0.27661	0.154804	1.78684	0.0739637	0.375131	38988.8	39245.9	29805.6	31929.4	26912.6	30350.4	106.265	102.63	72.7258	74.201	65.1349	80.923
LOC412472	protein lethal(2)denticleless	412472	446.086	-0.339919	0.190232	-1.78686	0.0739598	0.375131	418.144	419.005	343.574	524.199	448.489	523.107	2.68682	2.58827	2.03565	3.00418	2.57912	3.33213
LOC412524	calcium release-activated calcium channel protein 1	412524	9255.62	-0.143167	0.0801691	-1.78581	0.0741293	0.375559	8956.02	8552.36	8881.71	9763.64	9578.9	9801.1	50.7932	45.8972	45.8029	47.0556	49.3084	55.0173
LOC107964138	uncharacterized LOC107964138	107964138	65.4674	1.29972	0.727896	1.78558	0.074167	0.375559	66.5932	90.3188	122.705	12.8423	23.7182	76.6269	0.335776	0.525025	0.574906	0.0740175	0.125244	0.343299
LOC102655635	uncharacterized LOC102655635	102655635	1339.07	-0.665938	0.372857	-1.78604	0.0740924	0.375559	796.021	1599.67	710.622	1280.73	1307.73	2339.68	9.48133	19.9336	5.98962	17.4683	11.9098	31.7371
LOC411265	CXXC-type zinc finger protein 1	411265	3430.94	-0.164042	0.0918801	-1.78539	0.0741979	0.375559	3246.03	3326.9	3134.85	3625.03	3707.58	3545.27	9.77296	9.89853	8.12333	8.72935	9.53583	10.5573
LOC724916	tetraspanin-12	724916	1786.71	0.732246	0.410644	1.78316	0.0745595	0.376808	1043.81	2626.7	3021.75	1332.09	1848.94	846.983	6.19441	15.1227	18.2875	6.53773	10.0442	3.83986
LOC409665	LIM domain and actin-binding protein 1	409665	44981.1	0.338617	0.189885	1.78328	0.0745414	0.376808	52320.6	60319.9	38066.3	38671.6	37254.8	43253.4	96.939	113.411	60.6666	58.3278	56.5652	67.7367
LOC107965171	uncharacterized LOC107965171	107965171	21.735	-1.61804	0.907448	-1.78306	0.0745761	0.376808	3.09736	12.1046	17.072	43.1968	15.0934	39.846	0.0279186	0.0646533	0.178797	0.327077	0.141109	0.401717
LOC102655699	uncharacterized LOC102655699	102655699	906.839	0.523122	0.293497	1.78238	0.0746881	0.377088	860.292	801.696	1547.15	646.784	829.057	756.053	5.27415	5.49925	8.43195	3.39323	4.74232	4.57561
LOC102654737	peptide deformylase, mitochondrial	102654737	2305.54	-0.21011	0.117958	-1.78123	0.074875	0.377652	2307.53	2134.13	1970.75	2547.44	2478.55	2394.85	32.9714	29.2081	25.9023	31.015	31.9316	32.9864
LOC551053	facilitated trehalose transporter Tret1	551053	10922.6	-0.472112	0.265126	-1.78071	0.0749601	0.37787	12247.7	9337.29	5867.44	13533.4	10710.9	13838.8	86.5556	61.3036	34.3802	78.8519	65.4036	93.8458
LOC411981	probable ubiquitin carboxyl-terminal hydrolase FAF-X	411981	4816.93	-0.206765	0.116128	-1.7805	0.0749936	0.37787	4571.7	4518.74	4325.62	5697.3	4792.15	4996.08	6.69986	6.50882	5.80417	7.13927	6.3957	7.25321
LOC409389	ubiquitin specific protease-like	409389	6353.72	-0.229627	0.129014	-1.77985	0.0751002	0.378217	5237.64	5722.68	6588.73	6833.26	6606.58	7133.46	32.2141	33.6253	37.118	36.2201	38.0551	43.4316
LOC408845	protein unc-79 homolog	408845	10568.8	0.394851	0.221967	1.77887	0.0752612	0.378647	14520.4	10631.6	10866.3	6683.82	10191.3	10519.3	21.0578	15.4704	14.6985	7.73802	14.2744	15.0069
LOC410603	odorant receptor 65a	410603	940.332	0.348817	0.196359	1.77642	0.0756632	0.380479	985.735	1031.68	1142.76	1015.71	741.731	724.38	4.11033	4.36913	3.98916	6.28547	3.69289	4.39792
LOC100578824	zinc finger protein ZIC 4	100578824	37.3025	0.917382	0.516504	1.77614	0.0757107	0.380527	47.2347	37.2449	61.886	28.0195	26.9525	22.4772	0.0938908	0.173823	0.168029	0.0733093	0.0949506	0.122767
LOC550956	ATP-dependent (S)-NAD(P)H-hydrate dehydratase	550956	4723.35	-0.227799	0.128485	-1.77297	0.0762342	0.382531	4563.96	4682.61	3805.99	5157.93	4873	5256.61	50.9163	50.4336	38.9032	50.4122	49.6597	58.2567
LOC726066	facilitated trehalose transporter Tret1	726066	44.4147	1.32945	0.749718	1.77327	0.0761836	0.382531	48.0091	96.8367	45.881	22.1821	8.62478	44.9545	0.375982	0.571199	0.270625	0.152922	0.0296987	0.245859
LOC727027	cleft lip and palate transmembrane protein 1 homolog	727027	13143.4	-0.17856	0.100722	-1.7728	0.0762621	0.382531	12542.8	12543.1	11906.7	14538.6	12868.2	14461	78.7102	75.2547	67.558	78.6333	74.5946	89.3081
LOC409010	uncharacterized LOC409010	409010	2087.02	-0.27624	0.1558	-1.77304	0.0762221	0.382531	1719.03	1852.93	2092.39	2402.67	1981.54	2473.52	11.1608	11.3108	12.0306	13.346	11.6401	15.4665
LOC726284	regulator of G-protein signaling 17	726284	3376.73	0.396507	0.223752	1.77209	0.0763804	0.382933	4156.66	4536.43	2820.08	2850.99	2480.7	3415.52	7.36132	7.74321	4.50226	4.43098	4.07755	6.0758
LOC113218850	alpha-endosulfine	113218850	5323.97	-0.183177	0.103409	-1.77139	0.0764958	0.382938	5325.14	5009.44	4623.31	5703.14	5570.53	5712.28	66.5916	60.3643	53.2879	61.4331	63.7068	71.0316
LOC411955	uncharacterized LOC411955	411955	252.655	0.604929	0.341435	1.77173	0.0764402	0.382938	266.373	375.242	273.152	141.265	275.993	183.905	0.789317	1.16557	0.788574	0.358777	0.877499	0.596621
LOC100576519	TLD domain-containing protein 1	100576519	1850.79	0.234195	0.132199	1.77153	0.0764719	0.382938	1899.46	2154.62	1948.34	1703.35	1558.93	1840.07	11.5087	12.3332	10.6067	8.75515	8.91069	10.9416
LOC411509	tRNA (adenine(58)-N(1))-methyltransferase catalytic subunit TRMT61A	411509	951.701	-0.250485	0.141573	-1.7693	0.0768442	0.383032	784.406	924.604	899.482	1078.75	996.163	1026.8	11.2922	13.0388	11.8363	14.9045	13.5234	15.5437
LOC102656271	uncharacterized LOC102656271	102656271	22.7888	-1.25416	0.70889	-1.76918	0.0768632	0.383032	18.5842	13.0357	8.53601	44.3642	21.562	30.6508	0.213483	0.0619123	0.137484	0.417186	0.134715	0.27956
LOC100577833	histone H1.2	100577833	3781.73	-0.35917	0.202829	-1.7708	0.0765943	0.383032	2518.93	4182.6	3239.41	4069.84	4322.09	4357.52	40.0812	66.2652	47.943	55.9944	60.1063	70.0707
LOC100578019	uncharacterized LOC100578019	100578019	1655.23	-0.303645	0.171649	-1.76898	0.0768967	0.383032	1651.67	1238.39	1554.62	1954.36	1627.93	1904.43	9.33178	7.14912	7.94819	14.8765	9.08105	15.0582
LOC726647	uncharacterized LOC726647	726647	4896.47	0.330177	0.186529	1.77011	0.076709	0.383032	4793.94	4758.03	6811.73	4650.07	4461.17	3903.89	17.5789	16.6918	21.9344	13.6017	14.6109	13.6379
LOC100578412	uncharacterized LOC100578412	100578412	25.3392	1.15994	0.655426	1.76976	0.0767676	0.383032	30.9736	26.0714	48.015	19.8472	10.781	16.3471	0.0600139	0.0694212	0.114979	0	0.0379387	0.0392292
LOC550964	guanylate cyclase 32E	550964	163.959	0.788885	0.445746	1.76981	0.0767588	0.383032	169.58	315.65	137.643	155.275	121.825	83.7788	0.377857	0.86285	0.294417	0.290355	0.266166	0.231017
LOC102655278	uncharacterized LOC102655278	102655278	401.787	-0.410253	0.231738	-1.77033	0.0766723	0.383032	429.759	287.717	316.899	473.997	433.395	468.957	7.53644	5.33029	5.09934	6.45452	5.62559	7.32724
LOC113218632	uncharacterized LOC113218632	113218632	256.465	0.739512	0.418027	1.76905	0.0768854	0.383032	339.161	174.12	449.207	221.821	135.84	218.642	0.519315	0.271412	0.633009	0.287814	0.21135	0.342254
LOC410740	RING finger protein 121	410740	6085.03	0.325547	0.184081	1.7685	0.0769778	0.383055	6396.82	6641.69	7268.41	4149.22	6309.03	5744.98	27.2334	25.7984	24.8051	25.2506	25.325	28.4961
LOC409670	protein tyrosine phosphatase type IVA 1	409670	33030.1	0.251745	0.142342	1.76859	0.076963	0.383055	30509.8	40940.5	36264.2	31773	29214.3	29478.9	92.2789	120.77	101.417	85.9005	82.7925	89.4585
LOC552414	protein disabled	552414	297.033	0.490751	0.2777	1.7672	0.0771953	0.383376	391.816	354.757	294.492	242.836	189.745	308.551	0.682725	0.612508	0.480619	0.366366	0.289882	0.511563
LOC413073	JNK-interacting protein 3	413073	4433.71	0.219226	0.124073	1.76691	0.0772439	0.383428	4243.38	5033.65	5034.11	3871.36	4198.11	4221.63	11.049	12.924	12.8877	8.99154	10.118	11.372
LOC107963976	uncharacterized LOC107963976	107963976	933.765	0.317152	0.179541	1.76646	0.0773187	0.383609	1193.26	915.293	998.713	904.797	737.419	853.113	2.66111	2.02187	2.20724	1.83892	1.49308	1.76835
DHRS4	dehydrogenase/reductase (SDR family) member 4	412304	10782	-0.229406	0.129891	-1.76614	0.0773726	0.383687	10405.6	10074.7	9298.91	11294.2	10502.8	13115.5	75.3932	69.9567	47.7165	63.3812	75.5177	97.0362
LOC725750	uncharacterized LOC725750	725750	4174.06	0.264522	0.149809	1.76573	0.0774412	0.383837	4504.34	4048.52	5114.13	4255.46	3567.43	3554.47	19.6074	14.3951	9.94739	19.4161	21.4666	18.9311
LOC100577303	uncharacterized LOC100577303	100577303	179.307	-0.742228	0.420713	-1.76421	0.0776964	0.384912	75.8853	178.775	148.313	220.654	168.183	284.031	0.225558	0.455608	0.387155	0.535111	0.415846	0.75559
LOC724578	synaptic vesicle 2-related protein	724578	2369.9	0.227432	0.129003	1.763	0.0779007	0.385543	2637.4	2327.81	2703.78	2280.09	2005.26	2265.09	23.7789	19.5755	22.0761	18.1461	16.0187	20.3904
LOC409532	NAD-dependent protein deacetylase Sirt2	409532	3207.7	-0.279185	0.158345	-1.76314	0.0778771	0.385543	3286.3	2916.27	2491.45	3203.57	3468.24	3880.39	34.4485	29.9456	24.3857	29.9872	33.2775	39.42
LOC410371	calcium-transporting ATPase sarcoplasmic/endoplasmic reticulum type	410371	55301.1	0.220785	0.125323	1.76172	0.078116	0.385925	60655.6	62642.2	55274.9	54513.1	45011.7	53709.4	63.9244	76.241	64.6589	53.5379	42.9102	56.8304
LOC552489	SEC14-like protein 2	552489	1200.75	-0.419542	0.238131	-1.76181	0.0781011	0.385925	1228.1	1016.79	836.529	1172.15	1743.28	1207.64	9.31049	7.378	4.93406	8.0836	13.1066	9.21688
LOC551484	sphingomyelin phosphodiesterase 4	551484	1062.57	-0.32871	0.186594	-1.76163	0.0781318	0.385925	1097.24	807.283	920.822	1304.08	1041.44	1204.58	5.65811	4.11504	4.29103	6.21075	5.06162	5.96995
LOC725026	retinol dehydrogenase 10-A	725026	4222.08	-0.531667	0.301729	-1.76206	0.0780584	0.385925	4313.85	4129.53	1914.2	4371.05	5775.37	4828.52	57.3258	54.6628	23.1653	51.6827	71.3812	66.834
LOC552357	maltase A3	552357	121.515	0.644687	0.366028	1.76131	0.0781864	0.386005	127.766	173.189	144.045	68.8813	90.5602	124.646	0.676898	0.92327	0.725774	0.320365	0.538432	0.712309
LOC413718	probable glutamine--tRNA ligase	413718	3422.63	-0.254901	0.144807	-1.76028	0.0783605	0.386483	3263.07	2676.04	3424.01	4000.95	3542.63	3629.05	14.0065	12.1781	15.0473	15.2785	14.4432	15.9108
LOC725017	UDP-glucuronosyltransferase 2B15	725017	69.6657	-1.45773	0.828116	-1.7603	0.0783569	0.386483	41.8144	56.7984	12.804	42.0293	213.463	51.0846	0.304949	0.323683	0.097595	0.297693	1.60572	0.399454
LOC413877	nuclear cap-binding protein subunit 2	413877	1551.75	-0.268481	0.152554	-1.75991	0.0784225	0.386599	1537.06	1442.31	1243.06	1595.95	1874.81	1617.34	36.7527	33.6646	28.1334	33.6574	40.4787	37.6593
LOC551325	voltage-dependent anion-selective channel	551325	32687.6	-0.262513	0.14923	-1.75912	0.0785576	0.386885	31751.8	30240	27173.3	35239.2	30630.9	41090.4	254.461	232.076	198.47	243.044	224.352	324.35
LOC100576135	glutamate receptor 1-like	100576135	118.657	-0.981337	0.558458	-1.75723	0.0788792	0.388278	60.3985	125.701	53.35	74.7187	182.199	215.577	0.251676	0.680986	0.364297	0.301815	0.97812	1.12475
LOC726424	metabotropic glutamate receptor	726424	51.5779	1.16189	0.661921	1.75533	0.0792034	0.388924	30.9736	120.115	62.953	23.3496	30.1867	41.8894	0.195188	0.620968	0.311715	0.0894983	0.205639	0.191394
LOC100576966	trichohyalin	100576966	734.057	0.252306	0.143716	1.75559	0.0791578	0.388924	745.689	828.699	820.524	628.104	702.92	678.404	6.93659	7.68539	7.08504	5.1469	5.99801	6.45033
LOC113219034	putative uncharacterized protein DDB_G0282133	113219034	115.034	0.587874	0.334862	1.75557	0.0791614	0.388924	140.93	121.977	151.514	91.0634	113.2	71.5185	0.33928	0.276856	0.339261	0.190381	0.260841	0.156491
LOC726923	DNA polymerase epsilon subunit 3	726923	526.567	-0.290873	0.165692	-1.7555	0.0791744	0.388924	502.547	495.357	422.532	565.06	566.001	607.907	15.8362	19.4677	16.2903	19.109	16.1463	23.792
LOC411719	queuine tRNA-ribosyltransferase catalytic subunit	411719	2130.72	-0.200161	0.114031	-1.75532	0.0792045	0.388924	2073.68	1962.81	1912.07	2402.67	2128.17	2304.94	24.3623	22.8634	19.2415	25.1028	23.3885	27.7224
LOC551256	protein CNPPD1	551256	3207.57	-0.290652	0.165606	-1.75508	0.0792458	0.388937	3341.28	2973.07	2341	3425.39	3505.97	3658.68	39.9459	33.6979	25.0258	35.1836	37.9546	43.3958
LOC551706	unconventional myosin-IXb	551706	1860.98	0.711724	0.405743	1.75413	0.079409	0.389547	1537.84	1796.13	3598.99	1725.54	1760.53	746.857	3.18229	3.51491	6.80437	2.64141	2.9282	1.2399
LOC113219100	uncharacterized LOC113219100	113219100	7284.73	0.235173	0.134114	1.75354	0.0795098	0.389851	7329.13	8786.07	7515.95	7386.65	6310.11	6380.47	5.49476	5.98363	6.55423	5.0948	4.22845	4.96653
LOC413931	dynactin subunit 1	413931	12798.9	-0.157106	0.089627	-1.75289	0.0796205	0.390008	11959.7	11644.6	12704.8	13525.3	13100	13859.3	25.7101	25.0759	26.5138	26.2937	26.0769	30.5961
LOC107965722	uncharacterized LOC107965722	107965722	1531.68	0.300553	0.171497	1.75253	0.0796826	0.390008	1654.76	1894.83	1522.61	1242.2	1281.86	1593.84	16.5065	20.4114	12.7746	11.4713	12.6366	15.266
LOC411186	synaptic vesicle glycoprotein 2C	411186	1285.18	1.46186	0.834291	1.75222	0.0797364	0.390008	419.692	1932.08	3305.57	1040.22	585.407	428.089	2.80067	12.08	20.2357	5.92929	3.69919	2.76725
LOC102656145	uncharacterized LOC102656145	102656145	164.653	0.592677	0.338239	1.75224	0.0797318	0.390008	145.576	192.742	256.08	124.92	154.168	114.43	0.925164	1.1637	1.26013	0.811383	1.0169	0.788982
LOC408335	nuclear pore complex protein Nup98-Nup96	408335	16921.7	0.214768	0.122534	1.75273	0.079649	0.390008	16517.4	17450.2	20570.7	15420.1	15890.1	15682	38.8291	39.2758	43.8835	31.2864	33.7544	35.8339
LOC102655842	uncharacterized LOC102655842	102655842	94.1063	-0.775086	0.442438	-1.75185	0.0797989	0.390124	81.3057	58.6607	68.288	68.8813	144.465	143.037	0.772577	0.530992	0.617962	0.47135	1.18997	1.23145
LOC113219217	transcription factor 15-like	113219217	84.6954	-1.03358	0.590341	-1.75082	0.0799762	0.39061	91.3721	27.0025	48.015	148.27	125.059	68.4534	1.25899	0.292337	0.568754	1.80479	1.50888	0.577294
LOC413145	eukaryotic translation initiation factor 3 subunit F	413145	5901.38	-0.178492	0.101946	-1.75086	0.0799705	0.39061	5766.51	5677.05	5165.35	6479.51	6313.34	6006.53	114.226	110.256	94.6747	112.684	114.809	120.169
LOC413345	suppressor APC domain-containing protein 2	413345	1303.44	-0.22969	0.131238	-1.75018	0.0800876	0.390963	1270.69	1093.14	1235.59	1390.47	1476.99	1353.74	7.51067	6.57924	6.98035	8.02285	9.26965	9.16522
LOC725745	GPN-loop GTPase 1	725745	3876.48	0.208465	0.119147	1.74964	0.0801799	0.390967	4032.76	4601.6	3833.73	3519.95	3582.52	3688.31	30.9587	29.7928	29.0669	28.2625	27.0575	32.7852
LOC113219398	MATH and LRR domain-containing protein PFE0570w-like	113219398	892.38	0.435982	0.249204	1.7495	0.0802054	0.390967	936.951	1299.85	841.864	628.104	928.242	719.272	1.95677	2.57599	1.5588	1.13123	1.80818	1.49873
LOC413787	tetratricopeptide repeat protein 39B	413787	3700.98	-0.215234	0.123124	-1.74811	0.080445	0.391882	3709.86	3175.13	3390.93	3664.72	4174.4	4090.86	26.7293	21.478	21.5284	22.2166	26.0611	27.947
LOC408285	rho GTPase-activating protein conundrum	408285	9962.03	0.298935	0.171051	1.74763	0.0805274	0.391882	9266.53	10709.8	12996.1	8597.32	10077	8125.52	42.5724	48.0738	54.5146	34.2955	42.2646	36.4617
LOC725274	3-hydroxyacyl-CoA dehydrogenase type-2	725274	29478.5	-0.37042	0.211971	-1.74751	0.0805494	0.391882	29568.2	28325.7	19249.8	30574	29218.6	39934.9	423.313	387.899	249.06	378.342	382.581	564.701
LOC102654078	uncharacterized LOC102654078	102654078	17.5495	1.41318	0.808574	1.74775	0.080508	0.391882	19.3585	25.1403	32.01	12.8423	11.8591	4.08677	0.153463	0.26107	0.0992022	0.0963438	0.0973661	0.0989452
LOC113219215	uncharacterized LOC113219215	113219215	673.912	-0.313424	0.179491	-1.74618	0.0807798	0.392241	603.985	607.092	592.185	621.099	834.448	784.66	1.1916	0.790946	1.10308	1.43101	1.30218	2.77781
LOC412331	striatin-interacting protein 1	412331	1820.36	0.200228	0.114657	1.74632	0.0807549	0.392241	2068.26	1905.08	1865.12	1719.7	1749.75	1614.27	8.96717	7.97911	7.18044	6.39748	7.06521	6.95535
LOC726230	cAMP-responsive element-binding protein-like 2	726230	13404	0.432132	0.247701	1.74457	0.0810589	0.393244	11529.1	14990.1	19671.2	10850.6	14365.7	9017.46	73.4455	95.877	97.6671	55.073	61.1594	47.2581
LOC726379	putative leucine-rich repeat-containing protein DDB_G0290503	726379	1611.92	0.266337	0.152689	1.74432	0.081104	0.393244	1770.92	1814.76	1694.4	1656.65	1479.15	1255.66	9.2442	9.0021	8.18409	7.52463	7.13326	6.41036
LOC113219001	uncharacterized LOC113219001	113219001	6956.15	-0.185303	0.106226	-1.74442	0.0810857	0.393244	6794.06	6665.9	6069.1	7571.11	6951.58	7685.17	7.34748	5.72562	5.3468	4.34401	4.6429	5.96665
LOC724896	transmembrane protein 170A	724896	1077.1	-0.238879	0.137011	-1.7435	0.0812455	0.393715	1087.95	967.436	908.018	1144.13	1172.97	1182.1	30.7153	27.3495	25.1892	29.443	30.5848	33.1723
LOC413109	uncharacterized LOC413109	413109	330.388	-0.854935	0.490409	-1.74331	0.0812795	0.393715	319.802	275.612	109.901	324.559	668.421	284.031	0.537869	0.391818	0.155517	0.458571	0.960521	0.419348
LOC408322	uncharacterized LOC408322	408322	4474.48	0.154457	0.088615	1.74301	0.0813322	0.39378	4728.12	4757.1	4656.39	4082.68	4247.71	4374.89	45.9389	43.259	39.6907	35.335	37.2663	43.6408
LOC724943	phosphatidylinositol glycan anchor biosynthesis class U protein	724943	3294.99	-0.232212	0.133301	-1.742	0.0815076	0.394439	3436.52	2791.5	2861.7	3707.92	3558.8	3413.47	41.1038	32.4387	30.8771	37.7317	38.2015	40.2154
LOC551442	iron-sulfur protein NUBPL	551442	4565.82	-0.174024	0.100045	-1.73946	0.0819543	0.395979	4539.95	4314.82	4016.19	4857.88	4898.88	4767.22	42.4399	38.2869	32.8239	39.0354	43.2072	45.0256
LOC113218737	uncharacterized LOC113218737	113218737	500.745	0.281653	0.161922	1.73943	0.0819588	0.395979	523.454	567.984	556.974	489.174	419.38	447.501	2.43647	2.71011	2.25449	1.84934	1.30325	1.7152
LOC412878	DNA N6-methyl adenine demethylase	412878	1112.89	0.369875	0.212659	1.73929	0.0819839	0.395979	1098.79	1484.21	1181.17	1039.06	1099.66	774.443	0.208122	0.26367	0.203988	0.102388	0.146811	0.1315
LOC726798	sn1-specific diacylglycerol lipase beta	726798	6577.75	-0.38149	0.219732	-1.73616	0.0825361	0.396545	7378.68	5217.08	4542.22	7692.53	8401.62	6234.37	39.2602	26.704	22.3055	38.4825	42.2791	34.7304
LOC410891	protein dispatched	410891	947.136	0.277249	0.159623	1.73689	0.0824058	0.396545	1009.74	928.329	1175.83	912.969	835.526	820.419	2.06818	1.85676	2.28953	1.56692	1.52345	1.38611
LOC102654134	uncharacterized LOC102654134	102654134	568.15	0.575428	0.331386	1.73643	0.0824877	0.396545	654.317	418.074	967.77	520.696	391.35	456.697	0.812023	0.516726	0.937516	0.596118	0.408113	0.500034
LOC107964328	bone morphogenetic protein 10	107964328	279.222	0.972635	0.560152	1.73638	0.0824971	0.396545	348.453	647.13	114.169	158.777	178.964	227.837	2.13321	3.68324	0.528767	0.807864	0.986205	1.37366
LOC725406	serine/threonine-protein kinase PRP4 homolog	725406	5963.58	0.202107	0.116406	1.73622	0.0825248	0.396545	5908.99	6141.68	7092.35	5644.77	5492.91	5500.79	20.2188	20.7524	22.0882	16.9708	17.3168	18.4356
LOC410233	extracellular sulfatase SULF-1 homolog	410233	3080.21	0.464547	0.267413	1.73719	0.0823537	0.396545	2387.29	3568.99	4759.89	3080.98	2434.35	2249.77	5.91749	8.41626	10.299	6.55422	5.84356	5.45221
LOC100577699	5-formyltetrahydrofolate cyclo-ligase	100577699	3040.64	-0.334799	0.192773	-1.73675	0.0824309	0.396545	3050.9	2787.78	2228.96	3022.61	3080.13	4073.49	110.136	94.612	73.374	93.2225	101.365	144.841
LOC726586	ATP-dependent RNA helicase DDX24	726586	1208.99	-0.284873	0.16411	-1.73587	0.0825873	0.396601	1131.31	916.224	1222.78	1305.24	1396.14	1282.22	7.16612	5.7725	6.90996	7.28313	8.03845	8.36168
LOC100578245	uncharacterized LOC100578245	100578245	604286	-0.307425	0.17713	-1.73558	0.0826375	0.39664	592304	574169	453960	794332	571125	639826	15.2101	13.4406	10.853	10.0298	13.0927	11.4661
LOC411980	death-associated protein kinase 1	411980	806.159	0.502293	0.289443	1.73537	0.0826745	0.39664	782.858	743.966	1309.21	526.534	782.699	691.686	1.6618	1.56388	2.9992	1.3871	1.77302	1.98364
Or2	odorant receptor 2	725384	127.374	1.55249	0.895187	1.73427	0.082871	0.397202	70.4649	50.2806	449.207	101.571	73.3107	19.4122	0.0670245	0.155283	0.730629	0.043629	0.0423327	0
LOC727023	transcription initiation factor TFIID subunit 9	727023	1020.65	-0.213115	0.12288	-1.73434	0.0828586	0.397202	983.412	921.811	930.425	1106.77	1136.32	1045.19	17.8559	16.9237	15.5877	17.6184	18.7943	18.2824
LOC727081	uncharacterized LOC727081	727081	18819.3	-0.273364	0.157707	-1.73336	0.0830317	0.397266	18274.4	15265.7	17584.2	24347.8	19136.2	18307.7	111.272	88.7369	97.0957	129.312	106.988	110.407
LOC413796	methionine--tRNA ligase, cytoplasmic	413796	3915.04	-0.22478	0.129664	-1.73356	0.0829963	0.397266	3701.34	3210.51	3920.16	4423.58	4291.91	3942.71	18.4048	14.9292	16.9068	18.821	19.2646	19.2165
LOC551184	eukaryotic translation initiation factor 3 subunit C	551184	7551.76	-0.196221	0.113198	-1.73344	0.0830177	0.397266	6809.55	6745.98	7561.83	8719.91	7787.1	7686.19	36.0139	34.098	36.3039	39.6584	37.6881	39.9024
LOC724728	NF-kappa-B essential modulator	724728	3933.45	-0.167658	0.0967988	-1.73202	0.0832697	0.398162	3642.49	3741.25	3732.37	4067.5	4010.52	4406.56	32.388	31.8745	29.9824	32.3256	33.577	39.6398
LOC725088	eIF-2-alpha kinase GCN2	725088	2147.91	0.237583	0.137246	1.73107	0.0834392	0.398713	2244.04	2550.34	2178.82	1831.78	2163.74	1918.74	6.21203	6.96154	5.36286	4.29537	5.58118	5.32854
LOC552660	ubiquitin carboxyl-terminal hydrolase 46	552660	3993.81	-0.154883	0.0894796	-1.73093	0.0834644	0.398713	3908.87	3714.25	3715.3	4141.05	4184.1	4299.28	44.1977	39.4026	37.9134	40.8324	41.9192	48.4004
LOC409581	F-actin-capping protein subunit beta	409581	8324.43	-0.152545	0.0881545	-1.73042	0.0835545	0.398953	8170.06	7616.58	7867	8911.38	8466.3	8915.29	75.884	71.8201	63.0145	76.0056	68.3213	83.8471
LOC411406	zinc metalloproteinase nas-13	411406	1387.41	-0.388757	0.224792	-1.72941	0.0837354	0.399626	1394.59	1340.82	868.539	1404.48	1730.35	1585.67	14.801	13.8333	7.81001	12.6089	16.657	16.2485
LOC409643	failed axon connections	409643	668.871	0.716707	0.414559	1.72884	0.0838377	0.399924	1366.71	738.38	389.455	482.169	498.081	538.432	6.31711	3.45314	1.82948	2.06636	2.23322	2.68357
LOC100576527	cyclic AMP-dependent transcription factor ATF-2	100576527	1392.09	-0.248506	0.143763	-1.72858	0.0838839	0.399954	1348.9	1219.77	1248.39	1432.5	1701.24	1401.76	9.72201	8.47131	8.17038	8.77038	11.3836	9.77516
LOC411466	histone-lysine N-methyltransferase 2C	411466	4393.66	0.276026	0.159744	1.72793	0.084	0.400232	3952.23	4999.19	5487.58	4219.27	3868.22	3835.43	3.14155	3.85132	4.01056	2.93437	2.77779	3.02774
LOC100578739	RYamide receptor	100578739	4536.78	0.206433	0.119476	1.72781	0.0840219	0.400232	4961.97	4460.07	5161.08	3890.04	4350.13	4397.36	3.37083	4.11198	3.64126	0.673474	1.26029	1.99764
LOC410018	protein I'm not dead yet	410018	4608.17	0.192262	0.11131	1.72726	0.0841205	0.400511	4541.5	5256.18	4947.68	4135.21	4262.8	4505.66	10.9928	11.8936	10.0198	8.48832	8.97375	10.9635
LOC409409	serine/threonine-protein kinase dyf-5	409409	4705.75	0.308777	0.178899	1.72599	0.0843498	0.400948	5229.89	5468.48	4924.21	3312.14	5005.61	4294.17	33.7018	34.1421	28.1854	19.5143	28.1698	27.9669
LOC727262	derlin-1	727262	4703.17	-0.279053	0.161679	-1.72597	0.0843527	0.400948	5072.7	4007.55	3667.28	5508.17	5072.45	4890.84	116.778	95.3092	84.1464	112.606	110.18	119.834
LOC552556	arginase-1	552556	12653.8	-0.219885	0.127374	-1.7263	0.0842936	0.400948	10852.4	11436	12786.9	13869.7	12284.9	14693	4.11416	5.88996	4.36162	4.81358	6.4186	6.33256
LOC411086	protein jagged-1	411086	380.744	0.424581	0.246206	1.7245	0.0846185	0.401547	416.595	459.974	432.135	409.786	311.57	254.401	0.949986	0.946434	0.875691	0.778043	0.65271	0.567082
LOC100577107	uncharacterized LOC100577107	100577107	47.1561	-0.852397	0.494286	-1.7245	0.0846171	0.401547	26.3276	44.6939	29.876	60.709	73.3107	48.0196	0.327976	0.201879	0.437354	0.608622	0.572785	0.890761
LOC412399	organic cation transporter protein	412399	1954.62	-0.282722	0.163911	-1.72484	0.0845555	0.401547	2023.35	1608.05	1659.19	1971.87	2039.76	2425.5	11.9049	9.13157	8.35406	10.4971	11.2668	14.4341
LOC100577942	homeobox protein Nkx-2.5-like	100577942	4199.38	0.216824	0.125891	1.72231	0.0850128	0.403037	4446.26	4977.78	4118.62	3996.28	3627.8	4029.56	29.7584	33.3758	21.7423	23.4488	18.0038	26.4324
LOC551498	uncharacterized LOC551498	551498	1949.15	0.264695	0.153667	1.72253	0.0849738	0.403037	2113.95	1867.83	2400.75	1890.15	1807.97	1614.27	3.68363	3.09343	3.77285	2.90148	2.8143	2.86622
LOC725258	very-long-chain 3-oxoacyl-CoA reductase	725258	130888	-0.29825	0.17327	-1.72131	0.085195	0.403519	143524	111529	97165.4	141660	134743	156706	1519.73	1122.36	934.23	1278.25	1269.56	1612.49
LOC107964934	uncharacterized LOC107964934	107964934	297.6	0.589699	0.342566	1.72142	0.0851753	0.403519	415.821	234.643	422.532	192.634	213.463	306.508	4.64529	2.47954	4.92598	1.96632	2.23203	3.47529
LOC107964428	uncharacterized LOC107964428	107964428	102.637	0.55237	0.320985	1.72086	0.0852761	0.403713	109.956	145.255	110.968	79.3886	90.5602	79.692	0.648743	0.615817	0.595107	0.41126	0.462656	0.434967
LOC410583	ornithine aminotransferase, mitochondrial	410583	1409.23	1.91601	1.11357	1.7206	0.0853227	0.403743	917.593	4280.37	1486.33	78.2212	466.816	1226.03	11.3781	49.4677	16.2403	0.713377	5.66014	14.5911
LOC107963961	condensin complex subunit 2-like	107963961	99.788	0.532662	0.309716	1.71984	0.0854615	0.404088	126.217	114.528	113.102	81.7236	91.6383	71.5185	0.764222	0.691922	0.658037	0.43236	0.525085	0.477862
LOC113218605	DNA ligase 1-like	113218605	29194.7	0.23336	0.135746	1.71909	0.0855973	0.404088	30842	34830.5	28979.7	26298.7	24274.5	29942.7	139.106	148.953	118.244	103.939	99.79	132.506
LOC107964206	zinc finger protein 717	107964206	600.435	-0.56993	0.33147	-1.7194	0.0855411	0.404088	272.568	664.821	513.227	756.527	680.28	715.185	1.72981	1.57306	1.22766	2.01541	1.62191	1.8582
LOC411387	O-acyltransferase like protein	411387	362.13	-1.00336	0.583439	-1.71974	0.0854806	0.404088	257.081	383.622	82.1591	367.756	804.261	277.9	1.1099	1.63423	0.413737	1.25546	3.09822	1.13063
LOC409136	inositol polyphosphate 5-phosphatase E	409136	2036.5	0.232252	0.1351	1.71911	0.0855947	0.404088	2296.69	2042.88	2260.97	1776.9	1757.3	2084.25	14.3752	12.3555	12.9928	9.3286	10.0165	12.646
LOC551882	protein dj-1beta	551882	9360.79	-0.196705	0.114468	-1.71843	0.0857187	0.404098	8903.36	8418.27	8849.7	8968.58	10748.6	10276.2	222.012	203.177	209.268	199.584	255.869	264.131
LOC102654930	uncharacterized LOC102654930	102654930	183.45	0.574331	0.334221	1.71842	0.0857202	0.404098	171.129	301.684	185.658	154.107	156.324	131.798	0.54381	1.1711	0.748288	0.546123	0.643324	0.49887
LOC412161	broad-complex core protein isoforms 1/2/3/4/5	412161	10336.2	-0.20109	0.117013	-1.71853	0.0857	0.404098	9103.91	9058.89	10689.2	11593.1	10760.5	10811.6	1.51561	1.3874	2.6279	2.06208	1.96103	2.64436
LOC408387	HIV Tat-specific factor 1 homolog	408387	2363.57	-0.19178	0.111746	-1.71621	0.0861236	0.4041	2057.42	2335.25	2227.9	2598.81	2532.45	2429.58	18.5966	20.0121	18.2289	19.809	20.4673	21.5534
LOC412678	putative tricarboxylate transport protein, mitochondrial	412678	2684.5	-0.182274	0.10616	-1.71698	0.0859828	0.4041	2688.51	2434.88	2421.02	2876.67	2777.18	2908.76	27.9272	23.3316	22.6266	26.0661	25.5495	31.1035
LOC102655904	DNA-directed RNA polymerases I, II, and III subunit RPABC3	102655904	11108.2	0.154126	0.0897054	1.71813	0.0857723	0.4041	11818.7	11323.4	11961.1	10192.1	11041.9	10311.9	128.83	108.303	118.125	108.952	119.655	117.824
LOC724516	39S ribosomal protein L50, mitochondrial	724516	1728.16	-0.276949	0.161241	-1.71761	0.0858681	0.4041	1682.64	1709.54	1295.34	1821.27	1859.72	2000.47	21.7857	20.1917	14.3934	19.5539	22.1436	25.0057
LOC413165	protein phosphatase 1 regulatory subunit 7	413165	1462.92	-0.298703	0.174008	-1.71661	0.0860508	0.4041	1472.02	1388.3	1074.47	1740.71	1507.18	1594.86	16.372	14.7243	9.95962	17.2188	15.249	17.8919
LOC100576960	DNA polymerase subunit gamma-2, mitochondrial	100576960	4743.67	-0.165352	0.0962983	-1.71708	0.085965	0.4041	4707.99	4486.15	4221.05	4957.12	5067.06	5022.64	78.9984	74.3976	68.0926	73.0407	84.489	86.7542
LOC102655462	uncharacterized LOC102655462	102655462	30.3536	-0.964193	0.56127	-1.71788	0.085819	0.4041	19.3585	15.8291	26.675	40.8618	33.421	45.9762	0.0488455	0	0.0311749	0.111213	0.0772057	0.0855339
LOC409244	2-phosphoxylose phosphatase 1	409244	4757.91	-0.183227	0.106762	-1.71622	0.0861219	0.4041	4492.72	4571.81	4303.21	5442.79	4729.62	5007.32	21.9526	21.2473	19.1335	22.8052	20.7974	23.9286
LOC107964511	uncharacterized LOC107964511	107964511	222.547	-0.460786	0.268316	-1.71733	0.0859192	0.4041	200.554	209.502	151.514	227.659	301.867	244.185	0.982426	0.858522	0.618771	1.00601	1.34674	1.12208
LOC102655203	EKC/KEOPS complex subunit TPRKB	102655203	1135.5	-0.260015	0.151478	-1.71652	0.0860673	0.4041	1080.2	985.127	1034.99	1234.03	1094.27	1384.39	31.9345	27.8617	28.4135	31.8645	29.7269	40.5347
LOC413209	dnaJ homolog subfamily C member 2	413209	3618.06	-0.193346	0.112677	-1.71593	0.0861745	0.40415	3302.56	3225.41	3601.13	3651.88	3808.92	4118.44	14.084	11.418	12.3474	12.4453	13.6292	15.3181
LOC100578783	uncharacterized LOC100578783	100578783	540.447	0.52465	0.305909	1.71506	0.0863349	0.404713	668.255	800.765	443.872	324.559	525.034	480.196	1.09159	1.30392	0.704262	0.445558	0.820381	0.799747
LOC107964158	uncharacterized LOC107964158	107964158	301.311	0.395686	0.230788	1.7145	0.0864369	0.405001	297.347	378.967	351.043	249.841	300.789	229.881	2.73298	2.46687	2.66022	1.75633	2.14424	2.00808
LOC100577936	uncharacterized LOC100577936	100577936	24.499	1.71837	1.00245	1.71417	0.0864979	0.405079	12.3894	21.4158	78.9581	18.6797	4.31239	11.2386	0.0849224	0.272162	0.705406	0.117104	0.0567608	0.0719093
nAChRa1	nicotinic acetylcholine receptor alpha1 subunit	726214	861.212	0.45114	0.263213	1.71397	0.0865343	0.405079	847.128	932.053	1205.71	586.075	964.898	631.406	0.183983	0.203454	0.296805	0.121223	0.219435	0.172522
LOC102656360	uncharacterized LOC102656360	102656360	595.716	-0.306784	0.179042	-1.71347	0.0866258	0.405157	597.79	505.599	494.021	586.075	688.905	701.903	2.07342	1.81103	1.42151	1.85095	2.31514	2.7246
LOC412234	pyrroline-5-carboxylate reductase	412234	1676.39	0.214453	0.125159	1.71344	0.0866318	0.405157	1851.45	1881.8	1668.79	1444.17	1619.3	1592.82	25.6585	24.7754	21.8784	17.4165	21.017	23.2064
LOC726728	anaphase-promoting complex subunit 1	726728	2574.71	0.28194	0.164696	1.71188	0.0869193	0.40587	2619.59	2555	3302.37	2442.37	2475.31	2053.6	6.12994	5.78395	7.16463	5.05155	5.47336	4.97111
LOC552554	RNA 3'-terminal phosphate cyclase	552554	1212.74	-0.197797	0.115554	-1.71173	0.0869461	0.40587	1169.25	1140.62	1078.74	1298.24	1261.37	1328.2	12.6146	11.084	10.8265	12.6446	13.0335	13.7111
LOC552573	oxysterol-binding protein-related protein 8	552573	2459.11	0.278683	0.162765	1.71218	0.0868632	0.40587	2416.71	2467.47	3204.2	2387.5	2146.49	2132.27	10.3839	10.9885	13.1725	8.92675	8.92238	9.17784
LOC725482	L-lactate dehydrogenase A-like 6A	725482	1665.58	0.283962	0.165874	1.71191	0.086913	0.40587	2044.26	1927.42	1514.07	1606.45	1439.26	1462.04	5.39524	4.46899	3.06962	3.19567	2.7387	3.2203
LOC724308	serine protease 53	724308	89.7448	-1.77813	1.03904	-1.71132	0.0870214	0.405887	72.788	40.0382	8.53601	9.33984	177.886	229.881	0.522897	0.309684	0.0622537	0.0633099	1.3985	1.90851
LOC725057	coatomer subunit beta	725057	12152.1	-0.18065	0.105564	-1.71127	0.0870308	0.405887	11349.5	11042.2	11785	14013.3	12065	12657.7	53.2809	49.7055	49.8159	55.7026	51.4313	58.962
LOC726264	mitochondrial carrier homolog 2	726264	2143.61	-0.253814	0.148339	-1.71104	0.0870733	0.405897	2119.37	1961.87	1784.03	2576.63	2361.03	2058.71	28.2469	26.1407	21.4414	29.7727	29.4307	26.6268
LOC408911	ubiquitin carboxyl-terminal hydrolase 47	408911	5781.05	0.189503	0.110771	1.71077	0.0871237	0.405943	6011.2	6434.98	6033.89	5870.09	5031.48	5304.63	15.6635	15.8749	14.1793	13.3952	11.8703	13.9139
LOC726941	ATP-binding cassette sub-family A member 2	726941	5106.01	0.218945	0.128083	1.7094	0.0873771	0.406746	5126.13	5593.25	5759.67	4333.69	5267.59	4555.73	14.048	14.8225	14.013	10.1765	13.0669	12.0576
LOC102655064	uncharacterized LOC102655064	102655064	18.0797	2.15746	1.26372	1.70724	0.0877783	0.407667	10.8408	51.2117	26.675	0	6.46859	13.282	0.0572293	0.37525	0.146322	0	0.0482287	0.0748314
LOC726416	coiled-coil domain-containing protein 186	726416	1095.36	0.234187	0.137149	1.70754	0.0877221	0.407667	1198.68	1159.25	1193.97	1093.93	906.68	1019.65	3.69952	3.99212	3.889	3.33551	2.7728	3.13072
LOC412132	serine/threonine-protein kinase Genghis Khan	412132	2120.01	0.41289	0.241837	1.70731	0.0877645	0.407667	1725.23	2524.27	3015.34	1621.63	2151.88	1681.71	3.71304	3.97991	4.75027	3.1004	2.69101	3.78255
LOC413474	nuclear hormone receptor FTZ-F1 beta	413474	6323.96	0.18917	0.110776	1.70768	0.0876955	0.407667	6169.17	7322.34	6723.17	5811.72	6040.58	5876.78	20.3599	22.9418	19.5784	16.1881	18.1208	18.8592
LOC107964820	uncharacterized LOC107964820	107964820	79.2525	-1.04153	0.610221	-1.70681	0.0878565	0.407841	39.4913	21.4158	94.9631	94.5659	103.497	121.581	0.202457	0.0669061	0.40247	0.293265	0.448088	0.591803
LOC724155	probable peptide chain release factor C12orf65, mitochondrial	724155	1208.71	-0.302496	0.177342	-1.70572	0.08806	0.408597	1101.89	947.882	1198.24	1132.46	1422.01	1449.78	15.6713	13.0021	15.2206	14.1183	18.5922	20.1606
LOC411230	zinc finger protein ZPR1	411230	3341.13	-0.178029	0.104445	-1.70452	0.0882831	0.409442	3282.43	3150.92	2971.6	3521.12	3407.87	3712.83	23.0942	21.455	18.8497	21.5808	22.1665	25.9526
LOC410863	protein lin-9 homolog	410863	1009.79	-0.231707	0.136033	-1.70331	0.08851	0.409843	906.752	925.535	954.966	991.191	1169.74	1110.58	4.96232	5.23014	5.04074	4.78068	5.98103	5.88504
LOC100578503	negative elongation factor B	100578503	1945.59	-0.241613	0.141832	-1.70352	0.0884713	0.409843	1925.78	1745.85	1676.26	2362.98	2021.43	1941.22	14.4719	13.262	11.1275	15.2718	13.9723	14.4129
LOC113218958	superoxide dismutase [Cu-Zn], chloroplastic-like	113218958	15569.6	-0.264694	0.155356	-1.70379	0.08842	0.409843	15550.3	14849.5	12034.7	18234.9	17928.8	14819.7	362.932	330.641	258.147	374.617	386.546	349.773
LOC724330	protein FAM45A	724330	1485.58	-0.221995	0.130374	-1.70275	0.0886147	0.409843	1464.28	1357.58	1292.14	1476.86	1700.16	1622.45	19.8781	17.8713	16.029	17.5851	21.3122	22.3161
LOC413430	RAC serine/threonine-protein kinase	413430	4636.96	0.249538	0.146531	1.70297	0.0885737	0.409843	4842.72	5816.72	4451.53	3934.41	4355.52	4420.86	23.8605	27.5875	20.0941	16.5895	19.7857	21.6766
LOC411183	cytochrome b-c1 complex subunit Rieske, mitochondrial	411183	29167.5	-0.19614	0.115222	-1.70228	0.0887035	0.410065	24336	27839.6	29389.5	31700.6	29752.3	31987.2	445.286	482.137	486.754	498.013	494.37	575.805
LOC413738	uncharacterized LOC413738	413738	106.693	0.788702	0.463563	1.70139	0.0888698	0.410472	96.7925	136.875	171.787	115.581	50.6706	68.4534	0.369554	0.460391	0.580323	0.320509	0.131881	0.235314
LOC724388	solute carrier family 35 member G1	724388	5881.29	0.349501	0.20554	1.70041	0.0890545	0.410745	5478.45	8480.66	5811.95	4526.32	5408.82	5581.51	2.6486	2.2512	1.19104	1.35709	2.10057	2.65375
LOC552010	60S ribosomal export protein NMD3	552010	1992.22	-0.244008	0.1435	-1.7004	0.0890555	0.410745	1955.21	1719.78	1796.83	2333.79	1887.75	2259.98	19.3377	16.1878	16.7893	20.8474	17.2286	22.7419
LOC409634	uncharacterized LOC409634	409634	9062.06	0.202366	0.119006	1.70047	0.0890416	0.410745	9230.13	9923.9	9936.98	7523.24	8652.81	9105.32	44.0559	45.7763	43.6046	30.5153	38.0037	42.7118
LOC409549	succinate dehydrogenase cytochrome b560 subunit, mitochondrial	409549	12848.8	-0.232416	0.13675	-1.69957	0.0892113	0.410897	12899.7	12102.7	10444.9	13840.5	12633.2	15172.1	295.487	259.353	215.022	273.269	263.037	336.888
LOC551969	serine protease HTRA2, mitochondrial	551969	2590.32	-0.177601	0.104486	-1.69977	0.0891749	0.410897	2387.29	2574.55	2331.4	2666.52	2824.62	2757.55	17.338	17.871	15.6009	16.5896	19.0081	20.1012
LOC411351	elongation factor G, mitochondrial	411351	4704.81	-0.223028	0.131282	-1.69885	0.089348	0.411148	4323.14	4504.77	4197.58	5277.01	4405.11	5521.23	26.624	27.0696	23.6095	27.9313	24.4851	33.8191
LOC551225	puff-specific protein Bx42	551225	5291.51	-0.158764	0.0934489	-1.69894	0.0893306	0.411148	5049.47	4875.35	5076.79	5865.42	5350.6	5531.44	31.0098	27.9359	28.0314	32.4651	29.5422	34.1415
LOC412667	proto-oncogene tyrosine-protein kinase receptor Ret	412667	313.549	-0.554295	0.326761	-1.69633	0.0898228	0.412936	224.559	337.066	200.596	267.353	442.02	409.699	0.748107	1.00518	0.569799	0.789461	1.37145	1.40053
LOC411602	dynein heavy chain 6, axonemal	411602	1228.06	0.357999	0.211068	1.69614	0.08986	0.412936	1571.14	1355.71	1212.11	847.591	1098.58	1283.25	1.61158	1.19664	0.949894	0.661145	0.856768	1.28032
LOC413119	heparan-alpha-glucosaminide N-acetyltransferase	413119	8842.85	-0.225674	0.133156	-1.69481	0.0901111	0.413561	7578.46	7519.74	9360.8	9970.28	9458.15	9169.69	1.29014	1.52602	1.54934	1.74109	2.20216	1.28213
LOC551273	lysosomal Pro-X carboxypeptidase	551273	4396.42	-0.283894	0.167522	-1.69467	0.0901376	0.413561	4405.22	3603.44	3886.02	5543.2	4917.21	4023.43	43.6823	34.249	34.8494	47.03	45.6512	39.005
LOC102655838	protein transport protein sec31	102655838	1128.69	0.339981	0.200658	1.69433	0.0902023	0.413561	1032.2	1447.89	1303.87	953.831	881.884	1152.47	3.16719	3.63782	3.07208	2.90886	2.08775	3.30193
LOC408959	protein unc-13 homolog 4B	408959	15903.8	0.316571	0.186835	1.69439	0.090191	0.413561	19810.7	15125.1	17989.6	11803.2	13463.3	17230.8	58.8073	43.6137	48.4499	30.3172	36.9565	50.5914
LOC411201	discoidin domain-containing receptor 2	411201	35.5249	0.891935	0.526965	1.69259	0.090534	0.414017	39.4913	59.5918	39.479	21.0146	28.0305	25.5423	0.0994236	0.14778	0.0905489	0.0461871	0.0449074	0.0464022
LOC552726	40S ribosomal protein S18	552726	24773.5	-0.159094	0.0939994	-1.6925	0.0905498	0.414017	22874	23224	24129.2	25880.7	27780.4	24752.5	880.075	863.741	862.981	860.988	975.677	945.16
LOC113219368	5.8S ribosomal RNA	113219368	108.24	-0.735172	0.434424	-1.69229	0.0905907	0.414017	111.505	62.3852	69.355	186.797	112.122	107.278	226.588	76.8484	222.018	125.463	29.747	152.303
LOC410879	U3 small nucleolar RNA-interacting protein 2	410879	819.603	-0.313784	0.185402	-1.69245	0.0905597	0.414017	768.145	615.472	808.787	954.999	969.21	801.007	7.12175	5.94469	6.98178	7.97561	8.24855	7.27198
LOC409617	ADP-ribosylation factor GTPase-activating protein 2	409617	10263.1	-0.152742	0.0902011	-1.69335	0.0903888	0.414017	9810.11	9782.37	9567.8	11010.5	11216.5	10191.4	80.8417	77.3323	74.5847	79.5936	85.789	85.921
LOC408894	transducin-like enhancer protein 3	408894	3615.54	0.385988	0.228039	1.69264	0.0905243	0.414017	3124.46	3793.39	5372.35	2819.46	3003.58	3580.01	6.89765	9.35794	11.8908	6.04924	5.63827	6.99474
LOC725621	uncharacterized LOC725621	725621	177522	0.596462	0.352555	1.69182	0.0906794	0.414049	157457	340611	143046	101356	188618	134042	308.062	385.696	214.993	197.857	348.208	281.531
LOC412217	multidrug resistance-associated protein 1	412217	9505.52	0.254367	0.150383	1.69146	0.0907487	0.414049	9155.02	9698.57	12171.3	9287.3	8493.26	8227.69	23.7805	24.4021	28.1976	21.1595	20.8744	21.2232
LOC724888	ras association domain-containing protein 2	724888	106.314	0.837202	0.49498	1.69139	0.0907628	0.414049	86.7261	168.533	153.648	117.915	52.8268	58.2365	0.510655	0.904576	0.856233	0.622936	0.242103	0.354676
LOC408801	protein split ends	408801	47893.7	-0.164066	0.0969883	-1.6916	0.090722	0.414049	46710.5	43216.2	45592.9	53245.3	47358.7	51238.9	4.26307	4.51032	5.4382	4.06993	4.21883	4.54192
LOC725387	uncharacterized protein DDB_G0283357	725387	4712.74	-2.13931	1.26516	-1.69094	0.0908479	0.414248	977.217	3892.09	361.713	12118.4	10154.6	772.4	3.17914	12.6026	1.06774	35.5651	31.6467	2.64203
LOC113218587	uncharacterized LOC113218587	113218587	1094.68	0.234072	0.138446	1.6907	0.0908933	0.414267	1098.79	1162.04	1290	988.856	962.742	1065.63	1.19564	0.56274	0.641856	0.626867	0.299278	0.631444
LOC410246	netrin receptor UNC5B	410246	20.971	1.13339	0.670973	1.68918	0.0911853	0.41522	26.3276	27.0025	33.077	17.5122	8.62478	13.282	0.0341803	0.0395272	0.0290816	0.014823	0	0.0297854
LOC726896	zinc finger and BTB domain-containing protein 47	726896	159.081	0.4606	0.273013	1.6871	0.0915841	0.415339	184.293	202.985	165.385	143.6	112.122	146.102	0.543277	0.557315	0.419577	0.348384	0.300007	0.410009
LOC100576542	protein POLR1D	100576542	1029.3	-0.235279	0.139434	-1.68739	0.0915285	0.415339	941.597	1033.55	861.07	1100.93	1154.64	1084.02	42.32	46.8159	36.7883	46.3638	53.7519	49.5173
LOC113219297	uncharacterized LOC113219297	113219297	174.48	0.478492	0.283615	1.68712	0.0915805	0.415339	250.112	188.087	170.72	157.61	144.465	135.885	5.173	3.31175	2.56995	2.42027	3.09521	3.12838
LOC100578537	UV radiation resistance-associated gene protein	100578537	1052.77	0.205323	0.121597	1.68856	0.0913036	0.415339	1118.15	1127.59	1137.42	926.979	973.522	1032.93	5.40039	5.2852	4.80783	3.92293	4.33762	4.8524
LOC411671	GTP-binding protein Rit2	411671	470.56	0.456376	0.27034	1.68816	0.091381	0.415339	633.41	626.645	372.383	436.638	376.256	378.026	5.20551	4.20265	2.44654	2.79767	3.01699	3.03312
LOC409110	programmed cell death protein 2-like	409110	2277.04	-0.197226	0.11686	-1.68771	0.0914663	0.415339	2254.88	2157.41	1951.54	2452.88	2336.24	2509.28	20.9245	19.6051	16.606	19.7864	20.5032	22.6987
LOC102655213	uncharacterized LOC102655213	102655213	39.3833	-1.23669	0.733018	-1.68712	0.0915807	0.415339	30.9736	7.44898	32.01	42.0293	43.1239	80.7137	0.0281182	0.0325235	0.0348217	0.106448	0.140132	0.091905
LOC551806	aquaporin	551806	44806.5	0.212576	0.125938	1.68794	0.0914222	0.415339	49318.5	48197.7	46789	35825.3	44368	44340.4	394.667	372.246	342.306	244.249	325.011	349.67
LOC551499	FIT family protein CG10671	551499	2997.25	-0.158337	0.0937851	-1.68829	0.0913549	0.415339	2909.19	2744.95	2844.62	3092.65	3151.28	3240.81	29.2762	28.0831	26.233	27.5998	30.3108	33.5483
LOC102656429	Roc2 protein	102656429	3316.6	-0.173757	0.10305	-1.68613	0.0917701	0.415676	3155.44	3124.85	3070.83	3599.34	3273.11	3676.05	2.28209	1.96555	2.13516	2.76153	2.53312	2.53725
LOC413867	transaldolase	413867	22036.3	-0.233529	0.138505	-1.68607	0.0917828	0.415676	22142.2	21657.9	16968.5	24234.6	23714.9	23500	312.445	298.234	212.506	295.924	304.131	335.894
LOC551678	receptor expression-enhancing protein 5	551678	16546.7	-0.255349	0.151446	-1.68607	0.0917815	0.415676	16874.4	15988.3	12394.3	18510.4	18509.9	17003	323.537	291.895	218.15	305.113	322.129	318.657
LOC107964765	uncharacterized LOC107964765	107964765	14393.5	-0.180052	0.106848	-1.68512	0.0919649	0.416124	13905.6	13755.5	12827.5	16246.7	14039	15586.9	0.402654	0.326167	0.283175	0.157202	0.203587	0.131631
LOC552452	interleukin enhancer-binding factor 2 homolog	552452	2426.43	-0.175113	0.103985	-1.68401	0.092179	0.416577	2172.02	2392.98	2273.78	2512.42	2555.09	2652.31	25.005	25.7843	23.5182	24.2266	26.1378	29.7421
LOC113219381	5.8S ribosomal RNA	113219381	103.478	-0.723388	0.429631	-1.68374	0.0922311	0.416577	105.31	63.3163	65.087	177.457	102.419	107.278	226.588	76.8484	222.018	125.463	29.747	152.303
LOC100578334	transcription factor 21	100578334	3105.48	0.319712	0.189862	1.68392	0.092197	0.416577	3512.41	3571.78	3260.75	2389.83	2399.85	3498.28	74.3989	72.992	62.605	44.2897	46.0284	72.3099
LOC413814	transcription elongation factor SPT5	413814	2954.92	0.282451	0.167751	1.68375	0.0922292	0.416577	2734.97	3370.66	3624.6	3027.28	2488.25	2483.73	10.6631	12.728	13.1121	10.3817	8.5805	9.53431
LOC409443	serine/threonine-protein phosphatase 2A activator	409443	2556.85	-0.241722	0.143625	-1.68301	0.0923725	0.416912	2443.04	2455.37	2130.8	2531.1	2656.43	3124.34	31.3929	29.4232	25.0843	28.1982	31.3387	39.6548
LOC551758	arylsulfatase B	551758	2791.94	0.324207	0.192644	1.68293	0.0923885	0.416912	2799.24	3928.4	2585.34	2403.84	2419.25	2615.53	19.3346	27.0045	15.3489	13.7825	14.9874	17.7155
LOC551701	late secretory pathway protein AVL9 homolog	551701	117.208	0.772512	0.459134	1.68254	0.0924641	0.416985	101.439	110.804	231.539	106.241	77.6231	75.6053	0.614021	0.731329	1.24927	0.503986	0.388881	0.495877
LOC411916	2-amino-3-ketobutyrate coenzyme A ligase, mitochondrial	411916	3689.78	-0.273767	0.162722	-1.68242	0.0924878	0.416985	3858.54	3395.8	2766.73	3784.97	4016.99	4315.63	19.5739	14.3922	4.98947	13.4865	18.9655	24.6184
LOC410092	dual oxidase maturation factor 1	410092	5954.49	-0.273273	0.162671	-1.67991	0.0929747	0.41878	5665.85	5114.65	5395.82	7251.22	5238.48	7060.92	38.5673	32.4779	33.3168	42.0771	31.5182	46.4153
LOC412067	cysteine and histidine-rich domain-containing protein	412067	3035.08	-0.167785	0.0999023	-1.67949	0.0930561	0.418794	2943.27	2808.26	2824.35	3284.12	3039.16	3311.31	27.9612	26.0178	25.336	27.6446	27.0824	31.8479
LOC411248	contactin-associated protein-like 3	411248	27211.9	0.354456	0.2112	1.6783	0.093289	0.419654	28105.4	31201.9	32307.7	16846.7	26146	28663.6	55.6277	60.5482	58.6293	28.8624	47.9982	55.6301
[truncated: 6,941 more rows]
