# Supplementary material for: Enterococcus faecium Regulates Honey Bee Developmental Genes
Source: Int J Mol Sci. 2021 Nov 9;22(22):12105. doi: 10.3390/ijms222212105 (PMC8621553; doi:10.3390/ijms222212105)
Supplement: Supplementary file 1 [file ijms-22-12105-s001.zip › TableS7_sRNA-Seq_statistic.xlsx]

## Sheet: Sheet1
	data_QC							bowtie_statistic
Sample	raw_reads	raw_data(M)	clean_reads	clean_data(M)	low_quality_reads	low_quality_rate	Duplication_rate	Total_reads_for_bowtie	aligned_reads	aligned_rate	fail_aligned_reads	fail_aligned_rate
En1	14015902	14.0159	13103408	13.1034	696040	0.0496607	0.287586	12077944	11560022	0.9571	517922	0.0429
En2	15691968	15.692	14599485	14.5995	722848	0.0460648	0.309318	13936720	13288747	0.9535	647973	0.0465
En3	17240549	17.2405	16052637	16.0526	923578	0.0535701	0.292001	15372995	10889796	0.7084	4483199	0.2916
MF1	19184205	19.1842	17974032	17.974	943542	0.0491833	0.32581	16077159	15324595	0.9532	752564	0.0468
MF2	15961775	15.9618	14715904	14.7159	783854	0.0491082	0.30532	13966716	12394784	0.8875	1571932	0.1125
MF3	19856755	19.8568	18524289	18.5243	986752	0.0496935	0.330249	17232318	16141053	0.9367	1091265	0.0633
