# Supplementary material for: Enterococcus faecium Regulates Honey Bee Developmental Genes
Source: Int J Mol Sci. 2021 Nov 9;22(22):12105. doi: 10.3390/ijms222212105 (PMC8621553; doi:10.3390/ijms222212105)
Supplement: Supplementary file 1 [file ijms-22-12105-s001.zip › TableS8_sRNA-Seq_DESeq2.xlsx]

## Sheet: Sheet1
miRNA	baseMean	log2FoldChange	lfcSE	stat	pvalue	padj	En1_normalized_read_count	En2_normalized_read_count	En3_normalized_read_count	MF1_normalized_read_count	MF2_normalized_read_count	MF3_normalized_read_count
Mir3730	24.6762	-2.10561	0.532589	-3.95353	7.70063e-05	0.0097798	2.94511	12.1943	11.1737	44.7986	48.84	28.1055
Mir6053	23.6172	-1.52111	0.445414	-3.41504	0.000637736	0.0404962	8.83533	12.804	13.9672	34.4106	41.0256	30.6605
Mir279c	2180.24	-0.97837	0.348518	-2.80723	0.00499698	0.211539	855.554	1343.2	2202.62	2597.67	3082.78	2999.62
Mir932	109.794	-1.64694	0.632079	-2.60559	0.00917167	0.2912	25.0334	107.31	25.8393	101.933	103.541	295.107
Mir13a	1612.13	-0.698432	0.316278	-2.20828	0.0272246	0.450113	1080.86	965.18	1640.44	1434.21	1986.81	2565.26
Mir184	41013.7	0.553539	0.26123	2.11898	0.0340926	0.450113	52452.4	56585.9	37323.8	39878.6	33060.8	26780.7
Mir252a	540.005	0.423782	0.20348	2.08267	0.037281	0.450113	552.208	672.516	629.221	467.464	505.982	412.639
Mir315	111508	0.673488	0.309176	2.17833	0.0293812	0.450113	186617	112755	111849	76178.5	69499.3	112150
Mir317	22757.7	0.490755	0.241548	2.03171	0.0421834	0.450113	19479	28351.8	31941.5	18826.5	19092.5	18854.9
Mir6000a	142.935	-0.638485	0.278154	-2.29544	0.0217078	0.450113	95.7161	100.603	137.577	150.627	169.963	203.126
Mir750	1435.96	-1.2482	0.557815	-2.23767	0.0252428	0.450113	1354.75	777.387	421.11	640.815	2303.29	3118.43
Mir92b-1	42.3399	-1.12632	0.555304	-2.02829	0.0425304	0.450113	17.6707	35.3635	26.5376	94.1421	58.608	21.7178
Mir190	845.24	-0.55354	0.30658	-1.80553	0.0709916	0.643995	806.96	548.134	699.755	663.539	1095.97	1257.08
Mir3720	705.497	-0.434826	0.24033	-1.80929	0.0704065	0.643995	630.253	568.255	602.683	952.458	867.398	611.932
Mir1175	8.86558	-1.06043	0.741308	-1.43049	0.152576	0.717673	7.36277	5.48744	4.19015	5.19405	15.6288	15.3302
Mir124	2.2884	-2.32809	1.50413	-1.5478	0.121671	0.717673	0	0	2.09508	3.89553	3.9072	3.83256
Mir2-1	3300.18	0.324893	0.226911	1.43181	0.152198	0.717673	3456.09	4258.25	3292.76	2380.82	3244.93	3168.25
Mir2-2	2887.67	0.367026	0.237235	1.5471	0.121839	0.717673	2946.58	3847.3	2961.04	2032.82	2920.63	2617.64
Mir2-3	3597.15	0.374995	0.233705	1.60457	0.108589	0.717673	3335.34	4654.57	4191.55	2615.2	3614.16	3172.08
Mir279a	5940.9	0.516002	0.31782	1.62357	0.104468	0.717673	4249.79	7244.64	9480.91	5462.19	4856.65	4351.24
Mir279d	16565.6	0.391198	0.266428	1.4683	0.142022	0.717673	14510.6	18158.5	23725.3	17382.5	12686.7	12929.8
Mir281	14326.3	0.408265	0.270331	1.51024	0.130983	0.717673	15355.8	21862	11801.6	12720.2	12411.2	11806.8
Mir282	82.8706	-0.465532	0.320104	-1.45432	0.145859	0.717673	51.5394	67.6784	87.2948	79.8584	103.541	107.312
Mir29b	402.68	0.570064	0.393392	1.4491	0.14731	0.717673	259.17	412.168	770.289	296.061	369.23	309.16
Mir92a	32.8785	0.634007	0.41316	1.53453	0.124899	0.717673	44.1766	36.5829	39.8064	22.0747	17.5824	37.0481
Mir981	24.4852	-0.735329	0.455186	-1.61545	0.106214	0.717673	25.0334	19.5109	11.8721	33.7613	27.3504	29.383
Mir9a	465441	-0.293583	0.198273	-1.4807	0.138686	0.717673	495351	368572	390817	495246	513021	529637
Mir305	10535.2	-0.313158	0.240443	-1.30242	0.192772	0.741882	8006.28	8984.77	11198.2	12378.1	9365.56	13278.5
Mir33	19.2642	-0.724327	0.529243	-1.36861	0.171122	0.741882	17.6707	8.53602	18.1573	29.2165	25.3968	16.6078
Mir3719	258.281	-0.400384	0.300427	-1.33272	0.182625	0.741882	169.344	193.89	303.088	262.299	277.411	343.653
Mir3759	4605.54	-0.806049	0.604728	-1.33291	0.182561	0.741882	6735.47	2173.03	1146.7	2841.79	9398.77	5337.48
Mir6054	7.2204	1.08219	0.825437	1.31105	0.18984	0.741882	13.253	7.31658	9.77702	7.79107	3.9072	1.27752
Mir71	8109.62	0.220679	0.159016	1.38778	0.165205	0.741882	9369.87	8489.07	8328.62	7537.21	7490.1	7442.83
Mir276	726326	0.239793	0.202205	1.18589	0.235667	0.790124	711095	931449	717102	650775	629102	718430
Mir278	4842.04	-0.237775	0.194513	-1.22242	0.221551	0.790124	3937.61	4971.01	4419.21	4698.66	5657.62	5368.14
Mir2796	172.915	-0.67627	0.591084	-1.14412	0.252575	0.790124	98.6612	147.551	150.845	79.2092	455.189	106.034
Mir31a	1.16682e+06	0.355948	0.299127	1.18996	0.234064	0.790124	1.74342e+06	1.19546e+06	991235	765176	1.095e+06	1.21065e+06
Mir3747b	268.883	-0.277653	0.243962	-1.1381	0.255079	0.790124	288.621	212.181	230.458	270.74	267.643	343.653
Mir6012	34.3786	0.735381	0.613822	1.19804	0.230903	0.790124	20.6158	33.5343	72.6293	11.0373	39.072	29.383
Mir87-1	52182.1	0.253143	0.222256	1.13897	0.254715	0.790124	59326.3	65287.1	45630.7	41855.6	49783.6	51209.4
Mir87-2	52099.5	0.25583	0.220225	1.16168	0.245367	0.790124	59254.1	64975.5	45889.1	41697.1	50082.5	50698.4
Mir34	14843.8	-0.243543	0.221546	-1.09929	0.271643	0.808326	15076	13250.9	12454.5	13131.8	16076.2	19073.4
Mir3786	1255.1	0.184556	0.170852	1.08021	0.28005	0.808326	1348.86	1282.84	1375.77	1188.14	1088.16	1246.86
Mir9864	13.071	0.669473	0.617693	1.08383	0.278441	0.808326	16.1981	20.7303	11.8721	10.3881	3.9072	15.3302
Mir307	255.14	0.278181	0.274181	1.01459	0.310303	0.856705	235.609	239.618	361.75	200.62	240.293	252.949
Mir3715	12.858	0.594844	0.58407	1.01845	0.308466	0.856705	10.3079	18.2915	18.1573	13.6344	7.8144	8.94264
bantam	142802	-0.176527	0.200287	-0.881369	0.378118	0.858633	119380	130113	152736	152240	134814	167529
Mir210	3.56489	1.20005	1.24175	0.966419	0.333834	0.858633	10.3079	2.43886	2.79343	3.89553	1.9536	0
Mir263a	39310.6	0.184731	0.205191	0.900285	0.367969	0.858633	50539.6	38098.7	36836.3	36704.4	36649.5	37035.3
Mir3718c	27.8673	0.382278	0.426545	0.89622	0.370135	0.858633	23.5609	28.6566	41.9015	25.9702	25.3968	21.7178
Mir6038	9.70908	0.922402	0.963682	0.957164	0.338484	0.858633	4.41766	3.04858	30.7278	9.08958	5.8608	5.11008
Mir6046	19.24	-0.575737	0.588819	-0.977783	0.328182	0.858633	22.0883	9.75545	15.3639	16.2314	13.6752	38.3256
Mir6052	33.3195	-0.500878	0.568882	-0.880461	0.37861	0.858633	25.0334	10.3652	46.79	31.1643	50.7936	35.7706
Mir927a	2027.93	-0.228033	0.257025	-0.887202	0.37497	0.858633	2250.06	1935.24	1421.16	2117.22	1873.5	2570.37
Mir965	18.7111	-0.53283	0.536172	-0.993766	0.320337	0.858633	20.6158	15.2429	9.77702	14.9329	31.2576	20.4403
Mirlet7	3495	0.282878	0.314025	0.900813	0.367688	0.858633	3043.77	3169.3	5297.05	3974.09	3082.78	2403.02
Mir3477	291013	0.181745	0.213206	0.852437	0.393971	0.862662	377975	271033	278954	279779	257180	281159
Mir6057	38.3674	-0.333441	0.385922	-0.864011	0.387582	0.862662	41.2315	37.1926	25.1409	49.9927	33.2112	43.4357
Mir13b	5542.83	-0.243667	0.295651	-0.824173	0.409842	0.882201	4888.88	4736.27	5602.23	4691.52	4753.11	8584.94
Mir11	9713.71	0.149753	0.186289	0.803875	0.421469	0.89211	10661.3	10147.5	9846.85	10579.6	8681.8	8365.2
Mir1-1	998809	0.0552256	0.4061	0.13599	0.891829	0.976963	819112	561289	1.67337e+06	1.23751e+06	921056	780515
Mir10	25764.3	0.0398114	0.241451	0.164884	0.869035	0.976963	31695.3	26543.4	20123.9	26834.4	22218.3	27170.3
Mir100	21833.4	0.108809	0.238316	0.456574	0.647977	0.976963	28657.4	21019.9	18294.2	22059.1	21878.4	19091.3
Mir1000	2.03483	-0.262856	1.44198	-0.182288	0.855357	0.976963	4.41766	0.609715	0.698358	1.29851	3.9072	1.27752
Mir12	3431.85	0.0563879	0.240522	0.23444	0.814644	0.976963	3434	3475.99	3584.67	2545.73	3371.91	4178.77
Mir125	1139.13	0.0218376	0.276094	0.0790949	0.936957	0.976963	1410.71	1266.99	767.496	1175.8	1095.97	1117.83
Mir133	507.425	-0.0119314	0.247672	-0.0481743	0.961577	0.976963	446.184	547.524	518.88	389.553	550.915	591.492
Mir137	59.5292	0.228689	0.330391	0.692177	0.488826	0.976963	73.6277	56.7035	61.4555	41.5524	62.5152	61.321
Mir14	33403	0.0261125	0.201608	0.129521	0.896945	0.976963	31902.9	35989.1	33226.5	37190.7	27442.2	34666.8
Mir193	0.406477	1.95928	4.0019	0.489588	0.624426	0.976963	0	2.43886	0	0	0	0
Mir219	1.2748	0.434318	2.36031	0.184009	0.854007	0.976963	4.41766	0	0	0	1.9536	1.27752
Mir263b	3342.7	0.0216847	0.408626	0.0530674	0.957678	0.976963	2563.72	2123.64	5416.47	4466.23	3235.16	2250.99
Mir275	10987.5	0.149543	0.21192	0.705659	0.4804	0.976963	12388.6	12382.7	9901.33	12137.2	9689.85	9425.55
Mir2765	14.9124	0.357434	0.58075	0.61547	0.538244	0.976963	19.1432	18.9012	11.8721	13.6344	19.536	6.3876
Mir277	18745.9	-0.138435	0.268687	-0.51523	0.606393	0.976963	17710.4	17741.5	18088.2	13970	18979.2	25986
Mir2788	0.543612	0.173673	2.72636	0.0637013	0.949208	0.976963	0	0.609715	0.698358	0	1.9536	0
Mir279b	223.373	0.0292335	0.373301	0.0783107	0.937581	0.976963	144.31	194.499	335.91	218.799	279.365	167.355
Mir283	48046	0.0588909	0.275734	0.213578	0.830876	0.976963	55917.3	50805.8	40355.3	33434.7	49533.5	58229.4
Mir2944	273.487	-0.108775	0.220955	-0.492293	0.622512	0.976963	248.862	280.469	257.694	271.389	332.112	250.394
Mir3049	12.932	0.260933	0.563879	0.462746	0.643546	0.976963	14.7255	14.6332	13.9672	16.2314	7.8144	10.2202
Mir306	29466.5	-0.0245223	0.165573	-0.148106	0.882259	0.976963	28916.6	27409.1	31320.7	27973.8	30995.8	30182.7
Mir316	6418.41	0.0524914	0.188179	0.278944	0.780288	0.976963	7063.85	6377.01	6168.6	6780.83	5468.13	6652.05
Mir3718a	2405.16	-0.043928	0.225717	-0.194615	0.845694	0.976963	2176.44	2844.93	2083.9	2720.38	2498.65	2106.63
Mir3747a	67.3473	-0.0212244	0.281263	-0.0754611	0.939848	0.976963	72.1552	63.4104	64.9473	62.9778	70.3296	70.2636
Mir375	15330.9	0.0930906	1.27741	0.0728746	0.941906	0.976963	2722.75	4776.51	39976.8	22372.1	19186.3	2951.07
Mir3783	0.42584	-2.47576	4.02712	-0.614771	0.538706	0.976963	0	0	0	0	0	2.55504
Mir3785	2127.83	0.15003	0.25905	0.579154	0.562485	0.976963	2699.19	2421.18	1596.45	2150.33	2084.49	1815.36
Mir3791	75.881	0.0698036	0.465716	0.149884	0.880856	0.976963	51.5394	57.923	123.609	100.635	78.144	43.4357
Mir6000b	35.5192	0.0364724	0.47202	0.0772688	0.93841	0.976963	48.5943	29.2663	32.1245	38.9553	15.6288	48.5458
Mir6001	14.2755	0.100755	0.864066	0.116606	0.907173	0.976963	2.94511	32.3149	7.68194	6.49256	23.4432	12.7752
Mir6005	2169.8	0.0789785	0.227489	0.347175	0.72846	0.976963	2584.33	2304.11	1801.76	2366.54	2098.17	1863.9
Mir6037	18262.4	0.0869223	0.251025	0.34627	0.72914	0.976963	23285.5	16984.8	16169.8	16842.3	14925.5	21366.5
Mir6039	8.71269	0.395155	0.694575	0.568916	0.569413	0.976963	5.89022	9.75545	13.9672	9.73883	7.8144	5.11008
Mir6040	204.711	0.188214	0.305769	0.615545	0.538195	0.976963	198.795	209.132	245.124	212.956	238.339	123.919
Mir6041	107.937	0.169018	0.395768	0.427065	0.669332	0.976963	166.399	79.263	100.564	140.888	76.1904	84.3164
Mir6042	8.86278	0.51262	0.906427	0.565539	0.571707	0.976963	4.41766	3.04858	23.7442	8.44032	5.8608	7.66512
Mir6043	304.715	0.0175764	0.33083	0.0531282	0.95763	0.976963	353.413	378.633	189.255	364.232	291.086	251.672
Mir6044	19.5486	0.138005	0.511711	0.269693	0.787396	0.976963	17.6707	14.0235	30.0294	20.7762	15.6288	19.1628
Mir6045	1.5514	-0.370064	1.55712	-0.237659	0.812146	0.976963	1.47255	0.609715	2.09508	1.29851	0	3.83256
Mir6047a	11.9964	0.0612847	0.771936	0.0793909	0.936722	0.976963	1.47255	13.4137	20.9508	9.08958	11.7216	15.3302
Mir6049	15.6215	0.286664	0.555987	0.515595	0.606137	0.976963	16.1981	24.3886	10.4754	12.9851	15.6288	14.0527
Mir6051	11.4911	0.377844	0.602998	0.626609	0.530916	0.976963	11.7804	13.4137	14.6655	14.2836	5.8608	8.94264
Mir6058	2.85293	-0.186639	1.15655	-0.161375	0.871798	0.976963	1.47255	2.43886	3.49179	1.29851	5.8608	2.55504
Mir6060	47.8243	-0.102751	0.349655	-0.293864	0.768862	0.976963	47.1218	46.9481	46.0917	64.2763	39.072	43.4357
Mir6064	11.6148	0.233763	0.632737	0.369446	0.711795	0.976963	13.253	10.9749	13.2688	6.49256	7.8144	17.8853
Mir6067	10.6613	0.0921146	0.770493	0.119553	0.904837	0.976963	16.1981	4.26801	13.2688	8.44032	3.9072	17.8853
Mir7	31290.8	-0.130121	0.302004	-0.430857	0.666572	0.976963	38181.9	26464.1	24997	24221.8	30218.3	43661.8
Mir79	176.046	-0.100924	0.364345	-0.277002	0.781779	0.976963	103.079	152.429	252.107	183.09	210.989	154.58
Mir8	110228	-0.0709214	0.241583	-0.29357	0.769087	0.976963	94954.8	111769	115831	88668.8	109702	140442
Mir927b	15.3772	-0.410341	0.723638	-0.567053	0.570678	0.976963	1.47255	14.0235	23.0458	18.1792	21.4896	14.0527
Mir929	0.42584	-2.47576	4.02712	-0.614771	0.538706	0.976963	0	0	0	0	0	2.55504
Mir971	45.5778	0.214715	0.412275	0.520805	0.602503	0.976963	51.5394	43.2898	51.6785	27.918	35.1648	63.876
Mir9865	31.2258	-0.304679	0.506557	-0.601471	0.547527	0.976963	35.3413	23.7789	24.4425	33.7613	54.7008	15.3302
Mir9868	7.66523	-0.3189	0.812729	-0.392381	0.694777	0.976963	5.89022	7.9263	5.58687	3.89553	17.5824	5.11008
Mir9872	10.8836	0.248787	0.861021	0.288945	0.772624	0.976963	7.36277	3.65829	24.4425	14.2836	11.7216	3.83256
Mir9878	44.1701	-0.0193652	0.355684	-0.054445	0.956581	0.976963	41.2315	37.8024	52.3769	39.6046	39.072	54.9334
Mir9884	3.06624	-0.621982	1.06506	-0.583986	0.559229	0.976963	2.94511	3.04858	1.39672	4.54479	3.9072	2.55504
Mir9886	11.9115	0.0694587	0.572079	0.121415	0.903363	0.976963	14.7255	13.4137	9.07866	12.9851	9.768	11.4977
Mir9888	22.7524	-0.234993	0.473688	-0.496092	0.619829	0.976963	27.9785	16.4623	19.554	30.515	25.3968	16.6078
Mir9889	17.2503	0.0995192	0.579604	0.171702	0.863672	0.976963	20.6158	22.5595	9.77702	14.9329	25.3968	10.2202
Mir989	1827.25	0.0932757	0.311084	0.29984	0.764299	0.976963	2316.33	1971.21	1374.37	2339.92	1658.61	1303.07
Mir9895	11.7864	-0.39774	0.593281	-0.670408	0.502598	0.976963	8.83533	13.4137	7.68194	12.9851	17.5824	10.2202
Mir993	296.814	-0.0970758	0.252073	-0.385111	0.700155	0.976963	346.05	285.957	231.157	307.098	265.69	344.931
Mir996	1339.62	-0.131977	0.293923	-0.449019	0.653418	0.976963	826.103	1374.91	1632.06	1517.31	1441.76	1245.58
Miriab-4	32.4563	-0.020253	0.409522	-0.0494552	0.960557	0.976963	29.4511	29.2663	36.3146	27.2687	46.8864	25.5504
Mir2b	65.239	-0.0139195	0.377193	-0.036903	0.970562	0.978265	78.0454	69.5076	46.0917	44.7986	84.0048	68.9861
Mir252b	37.1851	-0.00604876	0.461209	-0.013115	0.989536	0.989536	32.3962	56.7035	21.6491	33.7613	35.1648	43.4357
