# Supplementary material for: Enterococcus faecium Regulates Honey Bee Developmental Genes
Source: Int J Mol Sci. 2021 Nov 9;22(22):12105. doi: 10.3390/ijms222212105 (PMC8621553; doi:10.3390/ijms222212105)
Supplement: Supplementary file 1 [file ijms-22-12105-s001.zip › TableS9_DEmiRNA_target_development.xlsx]

## Sheet: ame-mir-3730_Miranda
miRNA	gene_symbol	Score	Energy(kCal/Mol)	gene_id	gene_desc
ame-miR-3730-5p	LOC408890	167	-21.38	408890	protein groucho
ame-miR-3730-5p	LOC408890	164	-29.54	408890	protein groucho
ame-miR-3730-5p	LOC408890	163	-25.63	408890	protein groucho
ame-miR-3730-5p	LOC408890	160	-28.85	408890	protein groucho
ame-miR-3730-5p	LOC408890	155	-24.58	408890	protein groucho
ame-miR-3730-5p	LOC408890	153	-20.11	408890	protein groucho
ame-miR-3730-5p	LOC408890	151	-22.62	408890	protein groucho
ame-miR-3730-5p	LOC408890	149	-20.73	408890	protein groucho
ame-miR-3730-5p	LOC408890	149	-21.34	408890	protein groucho
ame-miR-3730-5p	LOC408890	147	-20.6	408890	protein groucho
ame-miR-3730-5p	LOC408890	147	-20.76	408890	protein groucho
ame-miR-3730-5p	LOC408890	147	-22.67	408890	protein groucho
ame-miR-3730-5p	LOC408890	145	-20.17	408890	protein groucho
ame-miR-3730-5p	LOC408890	144	-21.39	408890	protein groucho
ame-miR-3730-5p	LOC408890	143	-26.15	408890	protein groucho
ame-miR-3730-5p	LOC408890	143	-20.6	408890	protein groucho
ame-miR-3730-5p	LOC408890	142	-26.8	408890	protein groucho
ame-miR-3730-5p	LOC408890	142	-20.23	408890	protein groucho
ame-miR-3730-5p	LOC408890	142	-20.42	408890	protein groucho
ame-miR-3730-5p	LOC408890	142	-20.02	408890	protein groucho
ame-miR-3730-5p	LOC408890	142	-21.87	408890	protein groucho
ame-miR-3730-5p	LOC408890	141	-23.67	408890	protein groucho
ame-miR-3730-5p	LOC408890	167	-21.38	408890	protein groucho
ame-miR-3730-5p	LOC408890	164	-29.54	408890	protein groucho
ame-miR-3730-5p	LOC408890	149	-21.34	408890	protein groucho
ame-miR-3730-5p	LOC408890	147	-20.6	408890	protein groucho
ame-miR-3730-5p	LOC408890	147	-20.76	408890	protein groucho
ame-miR-3730-5p	LOC408890	147	-22.67	408890	protein groucho
ame-miR-3730-5p	LOC408890	145	-20.17	408890	protein groucho
ame-miR-3730-5p	LOC408890	144	-21.39	408890	protein groucho
ame-miR-3730-5p	LOC408890	142	-20.23	408890	protein groucho
ame-miR-3730-5p	LOC408890	142	-20.42	408890	protein groucho
ame-miR-3730-5p	LOC408890	142	-20.02	408890	protein groucho
ame-miR-3730-5p	LOC408890	142	-21.87	408890	protein groucho
ame-miR-3730-5p	LOC408890	141	-23.67	408890	protein groucho
ame-miR-3730-5p	LOC408890	167	-21.38	408890	protein groucho
ame-miR-3730-5p	LOC408890	164	-29.54	408890	protein groucho
ame-miR-3730-5p	LOC408890	163	-25.63	408890	protein groucho
ame-miR-3730-5p	LOC408890	160	-28.85	408890	protein groucho
ame-miR-3730-5p	LOC408890	155	-24.58	408890	protein groucho
ame-miR-3730-5p	LOC408890	153	-20.11	408890	protein groucho
ame-miR-3730-5p	LOC408890	151	-22.62	408890	protein groucho
ame-miR-3730-5p	LOC408890	149	-20.73	408890	protein groucho
ame-miR-3730-5p	LOC408890	149	-21.34	408890	protein groucho
ame-miR-3730-5p	LOC408890	147	-20.6	408890	protein groucho
ame-miR-3730-5p	LOC408890	147	-20.76	408890	protein groucho
ame-miR-3730-5p	LOC408890	147	-22.67	408890	protein groucho
ame-miR-3730-5p	LOC408890	145	-20.17	408890	protein groucho
ame-miR-3730-5p	LOC408890	144	-21.39	408890	protein groucho
ame-miR-3730-5p	LOC408890	143	-26.15	408890	protein groucho
ame-miR-3730-5p	LOC408890	143	-20.6	408890	protein groucho
ame-miR-3730-5p	LOC408890	142	-26.8	408890	protein groucho
ame-miR-3730-5p	LOC408890	142	-20.23	408890	protein groucho
ame-miR-3730-5p	LOC408890	142	-20.42	408890	protein groucho
ame-miR-3730-5p	LOC408890	142	-20.02	408890	protein groucho
ame-miR-3730-5p	LOC408890	142	-21.87	408890	protein groucho
ame-miR-3730-5p	LOC408890	141	-23.67	408890	protein groucho
ame-miR-3730-5p	LOC408894	161	-23.58	408894	transducin-like enhancer protein 3
ame-miR-3730-5p	LOC408894	160	-22.87	408894	transducin-like enhancer protein 3
ame-miR-3730-5p	LOC408894	159	-21.29	408894	transducin-like enhancer protein 3
ame-miR-3730-5p	LOC408894	155	-22.13	408894	transducin-like enhancer protein 3
ame-miR-3730-5p	LOC408894	151	-22	408894	transducin-like enhancer protein 3
ame-miR-3730-5p	LOC408894	147	-20.02	408894	transducin-like enhancer protein 3
ame-miR-3730-5p	LOC408894	144	-20.29	408894	transducin-like enhancer protein 3
ame-miR-3730-5p	LOC408894	144	-22.19	408894	transducin-like enhancer protein 3
ame-miR-3730-5p	LOC408894	143	-28.14	408894	transducin-like enhancer protein 3
ame-miR-3730-5p	LOC408894	143	-20.2	408894	transducin-like enhancer protein 3
ame-miR-3730-5p	LOC408894	142	-23.28	408894	transducin-like enhancer protein 3
ame-miR-3730-5p	LOC408894	140	-25.64	408894	transducin-like enhancer protein 3
ame-miR-3730-5p	LOC408894	140	-21.89	408894	transducin-like enhancer protein 3
ame-miR-3730-5p	LOC408894	161	-23.58	408894	transducin-like enhancer protein 3
ame-miR-3730-5p	LOC408894	160	-22.87	408894	transducin-like enhancer protein 3
ame-miR-3730-5p	LOC408894	159	-21.29	408894	transducin-like enhancer protein 3
ame-miR-3730-5p	LOC408894	155	-22.13	408894	transducin-like enhancer protein 3
ame-miR-3730-5p	LOC408894	151	-22	408894	transducin-like enhancer protein 3
ame-miR-3730-5p	LOC408894	147	-20.02	408894	transducin-like enhancer protein 3
ame-miR-3730-5p	LOC408894	144	-20.29	408894	transducin-like enhancer protein 3
ame-miR-3730-5p	LOC408894	144	-22.19	408894	transducin-like enhancer protein 3
ame-miR-3730-5p	LOC408894	143	-28.14	408894	transducin-like enhancer protein 3
ame-miR-3730-5p	LOC408894	143	-20.2	408894	transducin-like enhancer protein 3
ame-miR-3730-5p	LOC408894	142	-23.28	408894	transducin-like enhancer protein 3
ame-miR-3730-5p	LOC408894	140	-25.64	408894	transducin-like enhancer protein 3
ame-miR-3730-5p	LOC408894	140	-21.89	408894	transducin-like enhancer protein 3
ame-miR-3730-5p	LOC408894	161	-23.58	408894	transducin-like enhancer protein 3
ame-miR-3730-5p	LOC408894	160	-22.87	408894	transducin-like enhancer protein 3
ame-miR-3730-5p	LOC408894	159	-21.29	408894	transducin-like enhancer protein 3
ame-miR-3730-5p	LOC408894	155	-22.13	408894	transducin-like enhancer protein 3
ame-miR-3730-5p	LOC408894	151	-22	408894	transducin-like enhancer protein 3
ame-miR-3730-5p	LOC408894	147	-20.02	408894	transducin-like enhancer protein 3
ame-miR-3730-5p	LOC408894	144	-20.29	408894	transducin-like enhancer protein 3
ame-miR-3730-5p	LOC408894	144	-22.19	408894	transducin-like enhancer protein 3
ame-miR-3730-5p	LOC408894	143	-28.14	408894	transducin-like enhancer protein 3
ame-miR-3730-5p	LOC408894	143	-20.2	408894	transducin-like enhancer protein 3
ame-miR-3730-5p	LOC408894	142	-23.28	408894	transducin-like enhancer protein 3
ame-miR-3730-5p	LOC408894	140	-25.64	408894	transducin-like enhancer protein 3
ame-miR-3730-5p	LOC408894	140	-21.89	408894	transducin-like enhancer protein 3
ame-miR-3730-5p	LOC408894	161	-23.58	408894	transducin-like enhancer protein 3
ame-miR-3730-5p	LOC408894	160	-22.87	408894	transducin-like enhancer protein 3
ame-miR-3730-5p	LOC408894	159	-21.29	408894	transducin-like enhancer protein 3
ame-miR-3730-5p	LOC408894	155	-22.13	408894	transducin-like enhancer protein 3
ame-miR-3730-5p	LOC408894	151	-22	408894	transducin-like enhancer protein 3
ame-miR-3730-5p	LOC408894	147	-20.02	408894	transducin-like enhancer protein 3
ame-miR-3730-5p	LOC408894	144	-20.29	408894	transducin-like enhancer protein 3
ame-miR-3730-5p	LOC408894	144	-22.19	408894	transducin-like enhancer protein 3
ame-miR-3730-5p	LOC408894	143	-28.14	408894	transducin-like enhancer protein 3
ame-miR-3730-5p	LOC408894	143	-20.2	408894	transducin-like enhancer protein 3
ame-miR-3730-5p	LOC408894	142	-23.28	408894	transducin-like enhancer protein 3
ame-miR-3730-5p	LOC408894	140	-25.64	408894	transducin-like enhancer protein 3
ame-miR-3730-5p	LOC408894	140	-21.89	408894	transducin-like enhancer protein 3
ame-miR-3730-5p	LOC408894	159	-21.29	408894	transducin-like enhancer protein 3
ame-miR-3730-5p	LOC408894	155	-22.13	408894	transducin-like enhancer protein 3
ame-miR-3730-5p	LOC408894	151	-22	408894	transducin-like enhancer protein 3
ame-miR-3730-5p	LOC408894	147	-20.02	408894	transducin-like enhancer protein 3
ame-miR-3730-5p	LOC408894	144	-20.29	408894	transducin-like enhancer protein 3
ame-miR-3730-5p	LOC408894	144	-22.19	408894	transducin-like enhancer protein 3
ame-miR-3730-5p	LOC408894	143	-20.2	408894	transducin-like enhancer protein 3
ame-miR-3730-5p	LOC408894	142	-23.28	408894	transducin-like enhancer protein 3
ame-miR-3730-5p	LOC408894	140	-25.64	408894	transducin-like enhancer protein 3
ame-miR-3730-5p	LOC408894	140	-21.89	408894	transducin-like enhancer protein 3
ame-miR-3730-5p	LOC408894	161	-23.58	408894	transducin-like enhancer protein 3
ame-miR-3730-5p	LOC408894	160	-22.87	408894	transducin-like enhancer protein 3
ame-miR-3730-5p	LOC408894	159	-21.29	408894	transducin-like enhancer protein 3
ame-miR-3730-5p	LOC408894	155	-22.13	408894	transducin-like enhancer protein 3
ame-miR-3730-5p	LOC408894	151	-22	408894	transducin-like enhancer protein 3
ame-miR-3730-5p	LOC408894	147	-20.02	408894	transducin-like enhancer protein 3
ame-miR-3730-5p	LOC408894	144	-20.29	408894	transducin-like enhancer protein 3
ame-miR-3730-5p	LOC408894	144	-22.19	408894	transducin-like enhancer protein 3
ame-miR-3730-5p	LOC408894	143	-28.14	408894	transducin-like enhancer protein 3
ame-miR-3730-5p	LOC408894	143	-20.2	408894	transducin-like enhancer protein 3
ame-miR-3730-5p	LOC408894	142	-23.28	408894	transducin-like enhancer protein 3
ame-miR-3730-5p	LOC408894	140	-25.64	408894	transducin-like enhancer protein 3
ame-miR-3730-5p	LOC408894	140	-21.89	408894	transducin-like enhancer protein 3
ame-miR-3730-5p	LOC408894	161	-23.58	408894	transducin-like enhancer protein 3
ame-miR-3730-5p	LOC408894	160	-22.87	408894	transducin-like enhancer protein 3
ame-miR-3730-5p	LOC408894	159	-21.29	408894	transducin-like enhancer protein 3
ame-miR-3730-5p	LOC408894	155	-22.13	408894	transducin-like enhancer protein 3
ame-miR-3730-5p	LOC408894	151	-22	408894	transducin-like enhancer protein 3
ame-miR-3730-5p	LOC408894	147	-20.02	408894	transducin-like enhancer protein 3
ame-miR-3730-5p	LOC408894	144	-20.29	408894	transducin-like enhancer protein 3
ame-miR-3730-5p	LOC408894	144	-22.19	408894	transducin-like enhancer protein 3
ame-miR-3730-5p	LOC408894	143	-20.2	408894	transducin-like enhancer protein 3
ame-miR-3730-5p	LOC408894	142	-23.28	408894	transducin-like enhancer protein 3
ame-miR-3730-5p	LOC408894	140	-25.64	408894	transducin-like enhancer protein 3
ame-miR-3730-5p	LOC408894	140	-21.89	408894	transducin-like enhancer protein 3
ame-miR-3730-5p	LOC408894	161	-23.58	408894	transducin-like enhancer protein 3
ame-miR-3730-5p	LOC408894	160	-22.87	408894	transducin-like enhancer protein 3
ame-miR-3730-5p	LOC408894	159	-21.29	408894	transducin-like enhancer protein 3
ame-miR-3730-5p	LOC408894	155	-22.13	408894	transducin-like enhancer protein 3
ame-miR-3730-5p	LOC408894	151	-22	408894	transducin-like enhancer protein 3
ame-miR-3730-5p	LOC408894	147	-20.02	408894	transducin-like enhancer protein 3
ame-miR-3730-5p	LOC408894	144	-20.29	408894	transducin-like enhancer protein 3
ame-miR-3730-5p	LOC408894	144	-22.19	408894	transducin-like enhancer protein 3
ame-miR-3730-5p	LOC408894	143	-28.14	408894	transducin-like enhancer protein 3
ame-miR-3730-5p	LOC408894	143	-20.2	408894	transducin-like enhancer protein 3
ame-miR-3730-5p	LOC408894	142	-23.28	408894	transducin-like enhancer protein 3
ame-miR-3730-5p	LOC408894	140	-25.64	408894	transducin-like enhancer protein 3
ame-miR-3730-5p	LOC408894	140	-21.89	408894	transducin-like enhancer protein 3
ame-miR-3730-5p	LOC408894	161	-23.58	408894	transducin-like enhancer protein 3
ame-miR-3730-5p	LOC408894	160	-22.87	408894	transducin-like enhancer protein 3
ame-miR-3730-5p	LOC408894	159	-21.29	408894	transducin-like enhancer protein 3
ame-miR-3730-5p	LOC408894	155	-22.13	408894	transducin-like enhancer protein 3
ame-miR-3730-5p	LOC408894	151	-22	408894	transducin-like enhancer protein 3
ame-miR-3730-5p	LOC408894	147	-20.02	408894	transducin-like enhancer protein 3
ame-miR-3730-5p	LOC408894	144	-20.29	408894	transducin-like enhancer protein 3
ame-miR-3730-5p	LOC408894	144	-22.19	408894	transducin-like enhancer protein 3
ame-miR-3730-5p	LOC408894	143	-28.14	408894	transducin-like enhancer protein 3
ame-miR-3730-5p	LOC408894	143	-20.2	408894	transducin-like enhancer protein 3
ame-miR-3730-5p	LOC408894	142	-23.28	408894	transducin-like enhancer protein 3
ame-miR-3730-5p	LOC408894	140	-25.64	408894	transducin-like enhancer protein 3
ame-miR-3730-5p	LOC408894	140	-21.89	408894	transducin-like enhancer protein 3
ame-miR-3730-5p	LOC408894	161	-23.58	408894	transducin-like enhancer protein 3
ame-miR-3730-5p	LOC408894	160	-22.87	408894	transducin-like enhancer protein 3
ame-miR-3730-5p	LOC408894	159	-21.29	408894	transducin-like enhancer protein 3
ame-miR-3730-5p	LOC408894	155	-22.13	408894	transducin-like enhancer protein 3
ame-miR-3730-5p	LOC408894	151	-22	408894	transducin-like enhancer protein 3
ame-miR-3730-5p	LOC408894	147	-20.02	408894	transducin-like enhancer protein 3
ame-miR-3730-5p	LOC408894	144	-20.29	408894	transducin-like enhancer protein 3
ame-miR-3730-5p	LOC408894	144	-22.19	408894	transducin-like enhancer protein 3
ame-miR-3730-5p	LOC408894	143	-28.14	408894	transducin-like enhancer protein 3
ame-miR-3730-5p	LOC408894	143	-20.2	408894	transducin-like enhancer protein 3
ame-miR-3730-5p	LOC408894	142	-23.28	408894	transducin-like enhancer protein 3
ame-miR-3730-5p	LOC408894	140	-25.64	408894	transducin-like enhancer protein 3
ame-miR-3730-5p	LOC408894	140	-21.89	408894	transducin-like enhancer protein 3
ame-miR-3730-5p	LOC408894	161	-23.58	408894	transducin-like enhancer protein 3
ame-miR-3730-5p	LOC408894	160	-22.87	408894	transducin-like enhancer protein 3
ame-miR-3730-5p	LOC408894	159	-21.29	408894	transducin-like enhancer protein 3
ame-miR-3730-5p	LOC408894	155	-22.13	408894	transducin-like enhancer protein 3
ame-miR-3730-5p	LOC408894	151	-22	408894	transducin-like enhancer protein 3
ame-miR-3730-5p	LOC408894	147	-20.02	408894	transducin-like enhancer protein 3
ame-miR-3730-5p	LOC408894	144	-20.29	408894	transducin-like enhancer protein 3
ame-miR-3730-5p	LOC408894	144	-22.19	408894	transducin-like enhancer protein 3
ame-miR-3730-5p	LOC408894	143	-28.14	408894	transducin-like enhancer protein 3
ame-miR-3730-5p	LOC408894	143	-20.2	408894	transducin-like enhancer protein 3
ame-miR-3730-5p	LOC408894	142	-23.28	408894	transducin-like enhancer protein 3
ame-miR-3730-5p	LOC408894	140	-25.64	408894	transducin-like enhancer protein 3
ame-miR-3730-5p	LOC408894	140	-21.89	408894	transducin-like enhancer protein 3
ame-miR-3730-5p	LOC408894	159	-21.29	408894	transducin-like enhancer protein 3
ame-miR-3730-5p	LOC408894	155	-22.13	408894	transducin-like enhancer protein 3
ame-miR-3730-5p	LOC408894	151	-22	408894	transducin-like enhancer protein 3
ame-miR-3730-5p	LOC408894	147	-20.02	408894	transducin-like enhancer protein 3
ame-miR-3730-5p	LOC408894	144	-20.29	408894	transducin-like enhancer protein 3
ame-miR-3730-5p	LOC408894	144	-22.19	408894	transducin-like enhancer protein 3
ame-miR-3730-5p	LOC408894	143	-20.2	408894	transducin-like enhancer protein 3
ame-miR-3730-5p	LOC408894	142	-23.28	408894	transducin-like enhancer protein 3
ame-miR-3730-5p	LOC408894	140	-25.64	408894	transducin-like enhancer protein 3
ame-miR-3730-5p	LOC408894	140	-21.89	408894	transducin-like enhancer protein 3
ame-miR-3730-5p	LOC408894	161	-23.58	408894	transducin-like enhancer protein 3
ame-miR-3730-5p	LOC408894	160	-22.87	408894	transducin-like enhancer protein 3
ame-miR-3730-5p	LOC408894	159	-21.29	408894	transducin-like enhancer protein 3
ame-miR-3730-5p	LOC408894	155	-22.13	408894	transducin-like enhancer protein 3
ame-miR-3730-5p	LOC408894	151	-22	408894	transducin-like enhancer protein 3
ame-miR-3730-5p	LOC408894	147	-20.02	408894	transducin-like enhancer protein 3
ame-miR-3730-5p	LOC408894	144	-20.29	408894	transducin-like enhancer protein 3
ame-miR-3730-5p	LOC408894	144	-22.19	408894	transducin-like enhancer protein 3
ame-miR-3730-5p	LOC408894	143	-28.14	408894	transducin-like enhancer protein 3
ame-miR-3730-5p	LOC408894	143	-20.2	408894	transducin-like enhancer protein 3
ame-miR-3730-5p	LOC408894	142	-23.28	408894	transducin-like enhancer protein 3
ame-miR-3730-5p	LOC408894	140	-25.64	408894	transducin-like enhancer protein 3
ame-miR-3730-5p	LOC408894	140	-21.89	408894	transducin-like enhancer protein 3
ame-miR-3730-5p	LOC408894	161	-23.58	408894	transducin-like enhancer protein 3
ame-miR-3730-5p	LOC408894	160	-22.87	408894	transducin-like enhancer protein 3
ame-miR-3730-5p	LOC408894	159	-21.29	408894	transducin-like enhancer protein 3
ame-miR-3730-5p	LOC408894	155	-22.13	408894	transducin-like enhancer protein 3
ame-miR-3730-5p	LOC408894	151	-22	408894	transducin-like enhancer protein 3
ame-miR-3730-5p	LOC408894	147	-20.02	408894	transducin-like enhancer protein 3
ame-miR-3730-5p	LOC408894	144	-20.29	408894	transducin-like enhancer protein 3
ame-miR-3730-5p	LOC408894	144	-22.19	408894	transducin-like enhancer protein 3
ame-miR-3730-5p	LOC408894	143	-28.14	408894	transducin-like enhancer protein 3
ame-miR-3730-5p	LOC408894	143	-20.2	408894	transducin-like enhancer protein 3
ame-miR-3730-5p	LOC408894	142	-23.28	408894	transducin-like enhancer protein 3
ame-miR-3730-5p	LOC408894	140	-25.64	408894	transducin-like enhancer protein 3
ame-miR-3730-5p	LOC408894	140	-21.89	408894	transducin-like enhancer protein 3
ame-miR-3730-5p	LOC408996	159	-25.06	408996	1-phosphatidylinositol 4,5-bisphosphate phosphodiesterase
ame-miR-3730-5p	LOC408996	146	-20.48	408996	1-phosphatidylinositol 4,5-bisphosphate phosphodiesterase
ame-miR-3730-5p	LOC408996	159	-25.06	408996	1-phosphatidylinositol 4,5-bisphosphate phosphodiesterase
ame-miR-3730-5p	LOC408996	146	-20.48	408996	1-phosphatidylinositol 4,5-bisphosphate phosphodiesterase
ame-miR-3730-5p	LOC409001	173	-24.03	409001	disheveled-associated activator of morphogenesis 1
ame-miR-3730-5p	LOC409001	173	-32.9	409001	disheveled-associated activator of morphogenesis 1
ame-miR-3730-5p	LOC409001	153	-23.52	409001	disheveled-associated activator of morphogenesis 1
ame-miR-3730-5p	LOC409001	149	-22.95	409001	disheveled-associated activator of morphogenesis 1
ame-miR-3730-5p	LOC409001	141	-25.18	409001	disheveled-associated activator of morphogenesis 1
ame-miR-3730-5p	LOC409001	140	-26.69	409001	disheveled-associated activator of morphogenesis 1
ame-miR-3730-5p	LOC409001	173	-32.9	409001	disheveled-associated activator of morphogenesis 1
ame-miR-3730-5p	LOC409001	153	-23.52	409001	disheveled-associated activator of morphogenesis 1
ame-miR-3730-5p	LOC409001	173	-32.9	409001	disheveled-associated activator of morphogenesis 1
ame-miR-3730-5p	LOC409001	153	-23.52	409001	disheveled-associated activator of morphogenesis 1
ame-miR-3730-5p	LOC409001	141	-25.18	409001	disheveled-associated activator of morphogenesis 1
ame-miR-3730-5p	LOC409158	151	-23.62	409158	C-terminal-binding protein
ame-miR-3730-5p	LOC409158	151	-23.62	409158	C-terminal-binding protein
ame-miR-3730-5p	LOC409158	151	-23.62	409158	C-terminal-binding protein
ame-miR-3730-5p	LOC409158	151	-23.62	409158	C-terminal-binding protein
ame-miR-3730-5p	LOC409158	151	-23.62	409158	C-terminal-binding protein
ame-miR-3730-5p	LOC409158	151	-23.62	409158	C-terminal-binding protein
ame-miR-3730-5p	LOC409286	160	-21.24	409286	stress-activated protein kinase JNK
ame-miR-3730-5p	LOC409286	157	-21.53	409286	stress-activated protein kinase JNK
ame-miR-3730-5p	LOC409286	155	-24.76	409286	stress-activated protein kinase JNK
ame-miR-3730-5p	LOC409286	153	-20.37	409286	stress-activated protein kinase JNK
ame-miR-3730-5p	LOC409286	151	-20.51	409286	stress-activated protein kinase JNK
ame-miR-3730-5p	LOC409286	147	-21.02	409286	stress-activated protein kinase JNK
ame-miR-3730-5p	LOC409286	143	-20.91	409286	stress-activated protein kinase JNK
ame-miR-3730-5p	LOC409286	140	-23.4	409286	stress-activated protein kinase JNK
ame-miR-3730-5p	LOC409286	157	-21.53	409286	stress-activated protein kinase JNK
ame-miR-3730-5p	LOC409286	155	-24.76	409286	stress-activated protein kinase JNK
ame-miR-3730-5p	LOC409286	143	-20.91	409286	stress-activated protein kinase JNK
ame-miR-3730-5p	LOC409286	140	-23.4	409286	stress-activated protein kinase JNK
ame-miR-3730-5p	LOC409286	160	-21.24	409286	stress-activated protein kinase JNK
ame-miR-3730-5p	LOC409286	157	-20.34	409286	stress-activated protein kinase JNK
ame-miR-3730-5p	LOC409286	157	-21.53	409286	stress-activated protein kinase JNK
ame-miR-3730-5p	LOC409286	155	-24.76	409286	stress-activated protein kinase JNK
ame-miR-3730-5p	LOC409286	153	-20.37	409286	stress-activated protein kinase JNK
ame-miR-3730-5p	LOC409286	151	-20.51	409286	stress-activated protein kinase JNK
ame-miR-3730-5p	LOC409286	147	-21.02	409286	stress-activated protein kinase JNK
ame-miR-3730-5p	LOC409286	143	-20.91	409286	stress-activated protein kinase JNK
ame-miR-3730-5p	LOC409286	140	-23.4	409286	stress-activated protein kinase JNK
ame-miR-3730-5p	LOC409286	160	-21.24	409286	stress-activated protein kinase JNK
ame-miR-3730-5p	LOC409286	157	-20.34	409286	stress-activated protein kinase JNK
ame-miR-3730-5p	LOC409286	157	-21.53	409286	stress-activated protein kinase JNK
ame-miR-3730-5p	LOC409286	155	-24.76	409286	stress-activated protein kinase JNK
ame-miR-3730-5p	LOC409286	153	-20.37	409286	stress-activated protein kinase JNK
ame-miR-3730-5p	LOC409286	151	-20.51	409286	stress-activated protein kinase JNK
ame-miR-3730-5p	LOC409286	147	-21.02	409286	stress-activated protein kinase JNK
ame-miR-3730-5p	LOC409286	143	-20.91	409286	stress-activated protein kinase JNK
ame-miR-3730-5p	LOC409286	140	-23.4	409286	stress-activated protein kinase JNK
ame-miR-3730-5p	LOC409286	160	-21.24	409286	stress-activated protein kinase JNK
ame-miR-3730-5p	LOC409286	157	-20.34	409286	stress-activated protein kinase JNK
ame-miR-3730-5p	LOC409286	157	-21.53	409286	stress-activated protein kinase JNK
ame-miR-3730-5p	LOC409286	155	-24.76	409286	stress-activated protein kinase JNK
ame-miR-3730-5p	LOC409286	153	-20.37	409286	stress-activated protein kinase JNK
ame-miR-3730-5p	LOC409286	151	-20.51	409286	stress-activated protein kinase JNK
ame-miR-3730-5p	LOC409286	147	-21.02	409286	stress-activated protein kinase JNK
ame-miR-3730-5p	LOC409286	143	-20.91	409286	stress-activated protein kinase JNK
ame-miR-3730-5p	LOC409286	140	-23.4	409286	stress-activated protein kinase JNK
ame-miR-3730-5p	LOC409791	159	-20.65	409791	cAMP-dependent protein kinase catalytic subunit
ame-miR-3730-5p	LOC409910	150	-25.46	409910	ras-like GTP-binding protein Rho1
ame-miR-3730-5p	LOC409910	150	-25.46	409910	ras-like GTP-binding protein Rho1
ame-miR-3730-5p	LOC409910	150	-25.46	409910	ras-like GTP-binding protein Rho1
ame-miR-3730-5p	LOC409910	150	-25.46	409910	ras-like GTP-binding protein Rho1
ame-miR-3730-5p	LOC409910	150	-25.46	409910	ras-like GTP-binding protein Rho1
ame-miR-3730-5p	LOC409910	150	-25.46	409910	ras-like GTP-binding protein Rho1
ame-miR-3730-5p	LOC409910	150	-25.46	409910	ras-like GTP-binding protein Rho1
ame-miR-3730-5p	LOC410724	153	-25.8	410724	protein prickle
ame-miR-3730-5p	LOC410724	152	-21.56	410724	protein prickle
ame-miR-3730-5p	LOC410724	150	-26.06	410724	protein prickle
ame-miR-3730-5p	LOC410724	148	-25.79	410724	protein prickle
ame-miR-3730-5p	LOC410724	147	-24.53	410724	protein prickle
ame-miR-3730-5p	LOC410724	144	-21.32	410724	protein prickle
ame-miR-3730-5p	LOC410724	140	-21.03	410724	protein prickle
ame-miR-3730-5p	LOC410724	153	-25.8	410724	protein prickle
ame-miR-3730-5p	LOC410724	152	-21.56	410724	protein prickle
ame-miR-3730-5p	LOC410724	150	-26.06	410724	protein prickle
ame-miR-3730-5p	LOC410724	148	-25.79	410724	protein prickle
ame-miR-3730-5p	LOC410724	147	-24.53	410724	protein prickle
ame-miR-3730-5p	LOC410724	144	-21.32	410724	protein prickle
ame-miR-3730-5p	LOC410724	140	-21.03	410724	protein prickle
ame-miR-3730-5p	LOC410724	153	-25.8	410724	protein prickle
ame-miR-3730-5p	LOC410724	152	-21.56	410724	protein prickle
ame-miR-3730-5p	LOC410724	150	-26.06	410724	protein prickle
ame-miR-3730-5p	LOC410724	148	-25.79	410724	protein prickle
ame-miR-3730-5p	LOC410724	147	-24.53	410724	protein prickle
ame-miR-3730-5p	LOC410724	144	-21.32	410724	protein prickle
ame-miR-3730-5p	LOC410724	140	-21.03	410724	protein prickle
ame-miR-3730-5p	LOC410724	153	-25.8	410724	protein prickle
ame-miR-3730-5p	LOC410724	152	-21.56	410724	protein prickle
ame-miR-3730-5p	LOC410724	150	-26.06	410724	protein prickle
ame-miR-3730-5p	LOC410724	148	-25.79	410724	protein prickle
ame-miR-3730-5p	LOC410724	147	-24.53	410724	protein prickle
ame-miR-3730-5p	LOC410724	144	-21.32	410724	protein prickle
ame-miR-3730-5p	LOC410724	140	-21.03	410724	protein prickle
ame-miR-3730-5p	LOC410724	153	-25.8	410724	protein prickle
ame-miR-3730-5p	LOC410724	152	-21.56	410724	protein prickle
ame-miR-3730-5p	LOC410724	150	-26.06	410724	protein prickle
ame-miR-3730-5p	LOC410724	148	-25.79	410724	protein prickle
ame-miR-3730-5p	LOC410724	147	-24.53	410724	protein prickle
ame-miR-3730-5p	LOC410724	144	-21.32	410724	protein prickle
ame-miR-3730-5p	LOC410724	140	-21.03	410724	protein prickle
ame-miR-3730-5p	LOC410808	153	-23.56	410808	E3 ubiquitin-protein ligase Siah1
ame-miR-3730-5p	LOC410808	153	-23.56	410808	E3 ubiquitin-protein ligase Siah1
ame-miR-3730-5p	LOC410956	171	-20.89	410956	serine/threonine-protein kinase NLK
ame-miR-3730-5p	LOC410956	163	-23.72	410956	serine/threonine-protein kinase NLK
ame-miR-3730-5p	LOC410956	161	-29.45	410956	serine/threonine-protein kinase NLK
ame-miR-3730-5p	LOC410956	158	-23.67	410956	serine/threonine-protein kinase NLK
ame-miR-3730-5p	LOC410956	156	-22.45	410956	serine/threonine-protein kinase NLK
ame-miR-3730-5p	LOC410956	152	-25.67	410956	serine/threonine-protein kinase NLK
ame-miR-3730-5p	LOC410956	152	-20.27	410956	serine/threonine-protein kinase NLK
ame-miR-3730-5p	LOC410956	149	-21.03	410956	serine/threonine-protein kinase NLK
ame-miR-3730-5p	LOC410956	145	-22.97	410956	serine/threonine-protein kinase NLK
ame-miR-3730-5p	LOC410956	144	-26.9	410956	serine/threonine-protein kinase NLK
ame-miR-3730-5p	LOC410956	143	-22.1	410956	serine/threonine-protein kinase NLK
ame-miR-3730-5p	LOC410956	141	-21.56	410956	serine/threonine-protein kinase NLK
ame-miR-3730-5p	LOC410956	172	-26.63	410956	serine/threonine-protein kinase NLK
ame-miR-3730-5p	LOC410956	171	-20.89	410956	serine/threonine-protein kinase NLK
ame-miR-3730-5p	LOC410956	163	-23.72	410956	serine/threonine-protein kinase NLK
ame-miR-3730-5p	LOC410956	161	-29.45	410956	serine/threonine-protein kinase NLK
ame-miR-3730-5p	LOC410956	158	-23.67	410956	serine/threonine-protein kinase NLK
ame-miR-3730-5p	LOC410956	156	-22.45	410956	serine/threonine-protein kinase NLK
ame-miR-3730-5p	LOC410956	152	-26.52	410956	serine/threonine-protein kinase NLK
ame-miR-3730-5p	LOC410956	152	-25.67	410956	serine/threonine-protein kinase NLK
ame-miR-3730-5p	LOC410956	152	-20.27	410956	serine/threonine-protein kinase NLK
ame-miR-3730-5p	LOC410956	149	-23.07	410956	serine/threonine-protein kinase NLK
ame-miR-3730-5p	LOC410956	149	-21.03	410956	serine/threonine-protein kinase NLK
ame-miR-3730-5p	LOC410956	145	-20.32	410956	serine/threonine-protein kinase NLK
ame-miR-3730-5p	LOC410956	145	-22.97	410956	serine/threonine-protein kinase NLK
ame-miR-3730-5p	LOC410956	144	-21.01	410956	serine/threonine-protein kinase NLK
ame-miR-3730-5p	LOC410956	144	-20.95	410956	serine/threonine-protein kinase NLK
ame-miR-3730-5p	LOC410956	144	-26.9	410956	serine/threonine-protein kinase NLK
ame-miR-3730-5p	LOC410956	143	-22.1	410956	serine/threonine-protein kinase NLK
ame-miR-3730-5p	LOC410956	142	-23.02	410956	serine/threonine-protein kinase NLK
ame-miR-3730-5p	LOC410956	141	-21.56	410956	serine/threonine-protein kinase NLK
ame-miR-3730-5p	LOC410956	140	-23.34	410956	serine/threonine-protein kinase NLK
ame-miR-3730-5p	LOC410956	172	-26.63	410956	serine/threonine-protein kinase NLK
ame-miR-3730-5p	LOC410956	163	-23.72	410956	serine/threonine-protein kinase NLK
ame-miR-3730-5p	LOC410956	161	-29.45	410956	serine/threonine-protein kinase NLK
ame-miR-3730-5p	LOC410956	158	-23.67	410956	serine/threonine-protein kinase NLK
ame-miR-3730-5p	LOC410956	156	-22.45	410956	serine/threonine-protein kinase NLK
ame-miR-3730-5p	LOC410956	152	-26.52	410956	serine/threonine-protein kinase NLK
ame-miR-3730-5p	LOC410956	152	-25.67	410956	serine/threonine-protein kinase NLK
ame-miR-3730-5p	LOC410956	152	-20.27	410956	serine/threonine-protein kinase NLK
ame-miR-3730-5p	LOC410956	149	-23.07	410956	serine/threonine-protein kinase NLK
ame-miR-3730-5p	LOC410956	149	-21.03	410956	serine/threonine-protein kinase NLK
ame-miR-3730-5p	LOC410956	145	-20.32	410956	serine/threonine-protein kinase NLK
ame-miR-3730-5p	LOC410956	145	-22.97	410956	serine/threonine-protein kinase NLK
ame-miR-3730-5p	LOC410956	144	-21.01	410956	serine/threonine-protein kinase NLK
ame-miR-3730-5p	LOC410956	144	-20.95	410956	serine/threonine-protein kinase NLK
ame-miR-3730-5p	LOC410956	144	-26.9	410956	serine/threonine-protein kinase NLK
ame-miR-3730-5p	LOC410956	142	-23.02	410956	serine/threonine-protein kinase NLK
ame-miR-3730-5p	LOC410956	141	-21.56	410956	serine/threonine-protein kinase NLK
ame-miR-3730-5p	LOC410956	140	-23.34	410956	serine/threonine-protein kinase NLK
ame-miR-3730-5p	LOC410956	171	-20.89	410956	serine/threonine-protein kinase NLK
ame-miR-3730-5p	LOC410956	163	-23.72	410956	serine/threonine-protein kinase NLK
ame-miR-3730-5p	LOC410956	161	-29.45	410956	serine/threonine-protein kinase NLK
ame-miR-3730-5p	LOC410956	158	-23.67	410956	serine/threonine-protein kinase NLK
ame-miR-3730-5p	LOC410956	156	-22.45	410956	serine/threonine-protein kinase NLK
ame-miR-3730-5p	LOC410956	152	-25.67	410956	serine/threonine-protein kinase NLK
ame-miR-3730-5p	LOC410956	152	-20.27	410956	serine/threonine-protein kinase NLK
ame-miR-3730-5p	LOC410956	149	-21.03	410956	serine/threonine-protein kinase NLK
ame-miR-3730-5p	LOC410956	145	-22.97	410956	serine/threonine-protein kinase NLK
ame-miR-3730-5p	LOC410956	144	-26.9	410956	serine/threonine-protein kinase NLK
ame-miR-3730-5p	LOC410956	143	-22.1	410956	serine/threonine-protein kinase NLK
ame-miR-3730-5p	LOC410956	141	-21.56	410956	serine/threonine-protein kinase NLK
ame-miR-3730-5p	LOC410956	172	-26.63	410956	serine/threonine-protein kinase NLK
ame-miR-3730-5p	LOC410956	163	-23.72	410956	serine/threonine-protein kinase NLK
ame-miR-3730-5p	LOC410956	161	-29.45	410956	serine/threonine-protein kinase NLK
ame-miR-3730-5p	LOC410956	158	-23.67	410956	serine/threonine-protein kinase NLK
ame-miR-3730-5p	LOC410956	156	-22.45	410956	serine/threonine-protein kinase NLK
ame-miR-3730-5p	LOC410956	152	-26.52	410956	serine/threonine-protein kinase NLK
ame-miR-3730-5p	LOC410956	152	-25.67	410956	serine/threonine-protein kinase NLK
ame-miR-3730-5p	LOC410956	152	-20.27	410956	serine/threonine-protein kinase NLK
ame-miR-3730-5p	LOC410956	149	-23.07	410956	serine/threonine-protein kinase NLK
ame-miR-3730-5p	LOC410956	149	-21.03	410956	serine/threonine-protein kinase NLK
ame-miR-3730-5p	LOC410956	145	-20.32	410956	serine/threonine-protein kinase NLK
ame-miR-3730-5p	LOC410956	145	-22.97	410956	serine/threonine-protein kinase NLK
ame-miR-3730-5p	LOC410956	144	-21.01	410956	serine/threonine-protein kinase NLK
ame-miR-3730-5p	LOC410956	144	-20.95	410956	serine/threonine-protein kinase NLK
ame-miR-3730-5p	LOC410956	144	-26.9	410956	serine/threonine-protein kinase NLK
ame-miR-3730-5p	LOC410956	142	-23.02	410956	serine/threonine-protein kinase NLK
ame-miR-3730-5p	LOC410956	141	-21.56	410956	serine/threonine-protein kinase NLK
ame-miR-3730-5p	LOC410956	140	-23.34	410956	serine/threonine-protein kinase NLK
ame-miR-3730-5p	LOC410956	171	-20.89	410956	serine/threonine-protein kinase NLK
ame-miR-3730-5p	LOC410956	163	-23.72	410956	serine/threonine-protein kinase NLK
ame-miR-3730-5p	LOC410956	161	-29.45	410956	serine/threonine-protein kinase NLK
ame-miR-3730-5p	LOC410956	158	-23.67	410956	serine/threonine-protein kinase NLK
ame-miR-3730-5p	LOC410956	156	-22.45	410956	serine/threonine-protein kinase NLK
ame-miR-3730-5p	LOC410956	152	-25.67	410956	serine/threonine-protein kinase NLK
ame-miR-3730-5p	LOC410956	152	-20.27	410956	serine/threonine-protein kinase NLK
ame-miR-3730-5p	LOC410956	149	-21.03	410956	serine/threonine-protein kinase NLK
ame-miR-3730-5p	LOC410956	145	-22.97	410956	serine/threonine-protein kinase NLK
ame-miR-3730-5p	LOC410956	144	-26.9	410956	serine/threonine-protein kinase NLK
ame-miR-3730-5p	LOC410956	143	-22.1	410956	serine/threonine-protein kinase NLK
ame-miR-3730-5p	LOC410956	141	-21.56	410956	serine/threonine-protein kinase NLK
ame-miR-3730-5p	LOC410956	172	-26.63	410956	serine/threonine-protein kinase NLK
ame-miR-3730-5p	LOC410956	163	-23.72	410956	serine/threonine-protein kinase NLK
ame-miR-3730-5p	LOC410956	161	-29.45	410956	serine/threonine-protein kinase NLK
ame-miR-3730-5p	LOC410956	158	-23.67	410956	serine/threonine-protein kinase NLK
ame-miR-3730-5p	LOC410956	156	-22.45	410956	serine/threonine-protein kinase NLK
ame-miR-3730-5p	LOC410956	152	-26.52	410956	serine/threonine-protein kinase NLK
ame-miR-3730-5p	LOC410956	152	-25.67	410956	serine/threonine-protein kinase NLK
ame-miR-3730-5p	LOC410956	152	-20.27	410956	serine/threonine-protein kinase NLK
ame-miR-3730-5p	LOC410956	149	-23.07	410956	serine/threonine-protein kinase NLK
ame-miR-3730-5p	LOC410956	149	-21.03	410956	serine/threonine-protein kinase NLK
ame-miR-3730-5p	LOC410956	145	-20.32	410956	serine/threonine-protein kinase NLK
ame-miR-3730-5p	LOC410956	145	-22.97	410956	serine/threonine-protein kinase NLK
ame-miR-3730-5p	LOC410956	144	-21.01	410956	serine/threonine-protein kinase NLK
ame-miR-3730-5p	LOC410956	144	-20.95	410956	serine/threonine-protein kinase NLK
ame-miR-3730-5p	LOC410956	144	-26.9	410956	serine/threonine-protein kinase NLK
ame-miR-3730-5p	LOC410956	142	-23.02	410956	serine/threonine-protein kinase NLK
ame-miR-3730-5p	LOC410956	141	-21.56	410956	serine/threonine-protein kinase NLK
ame-miR-3730-5p	LOC410956	140	-23.34	410956	serine/threonine-protein kinase NLK
ame-miR-3730-5p	LOC411046	172	-24.35	411046	serine/threonine-protein phosphatase 2B catalytic subunit 2
ame-miR-3730-5p	LOC411046	159	-31.25	411046	serine/threonine-protein phosphatase 2B catalytic subunit 2
ame-miR-3730-5p	LOC411046	157	-20.75	411046	serine/threonine-protein phosphatase 2B catalytic subunit 2
ame-miR-3730-5p	LOC411046	156	-20.01	411046	serine/threonine-protein phosphatase 2B catalytic subunit 2
ame-miR-3730-5p	LOC411046	153	-21.64	411046	serine/threonine-protein phosphatase 2B catalytic subunit 2
ame-miR-3730-5p	LOC411046	153	-23.34	411046	serine/threonine-protein phosphatase 2B catalytic subunit 2
ame-miR-3730-5p	LOC411046	148	-20.34	411046	serine/threonine-protein phosphatase 2B catalytic subunit 2
ame-miR-3730-5p	LOC411046	147	-21.7	411046	serine/threonine-protein phosphatase 2B catalytic subunit 2
ame-miR-3730-5p	LOC411046	147	-20.79	411046	serine/threonine-protein phosphatase 2B catalytic subunit 2
ame-miR-3730-5p	LOC411046	145	-20.62	411046	serine/threonine-protein phosphatase 2B catalytic subunit 2
ame-miR-3730-5p	LOC411046	145	-21.26	411046	serine/threonine-protein phosphatase 2B catalytic subunit 2
ame-miR-3730-5p	LOC411046	143	-20.57	411046	serine/threonine-protein phosphatase 2B catalytic subunit 2
ame-miR-3730-5p	LOC411046	143	-20.83	411046	serine/threonine-protein phosphatase 2B catalytic subunit 2
ame-miR-3730-5p	LOC411046	142	-21.39	411046	serine/threonine-protein phosphatase 2B catalytic subunit 2
ame-miR-3730-5p	LOC411046	141	-20.43	411046	serine/threonine-protein phosphatase 2B catalytic subunit 2
ame-miR-3730-5p	LOC411046	140	-21.12	411046	serine/threonine-protein phosphatase 2B catalytic subunit 2
ame-miR-3730-5p	LOC411046	140	-21.13	411046	serine/threonine-protein phosphatase 2B catalytic subunit 2
ame-miR-3730-5p	LOC411046	172	-24.35	411046	serine/threonine-protein phosphatase 2B catalytic subunit 2
ame-miR-3730-5p	LOC411046	159	-31.25	411046	serine/threonine-protein phosphatase 2B catalytic subunit 2
ame-miR-3730-5p	LOC411046	157	-20.75	411046	serine/threonine-protein phosphatase 2B catalytic subunit 2
ame-miR-3730-5p	LOC411046	156	-20.01	411046	serine/threonine-protein phosphatase 2B catalytic subunit 2
ame-miR-3730-5p	LOC411046	153	-21.64	411046	serine/threonine-protein phosphatase 2B catalytic subunit 2
ame-miR-3730-5p	LOC411046	153	-23.34	411046	serine/threonine-protein phosphatase 2B catalytic subunit 2
ame-miR-3730-5p	LOC411046	148	-20.34	411046	serine/threonine-protein phosphatase 2B catalytic subunit 2
ame-miR-3730-5p	LOC411046	147	-21.7	411046	serine/threonine-protein phosphatase 2B catalytic subunit 2
ame-miR-3730-5p	LOC411046	147	-20.79	411046	serine/threonine-protein phosphatase 2B catalytic subunit 2
ame-miR-3730-5p	LOC411046	145	-20.62	411046	serine/threonine-protein phosphatase 2B catalytic subunit 2
ame-miR-3730-5p	LOC411046	145	-21.26	411046	serine/threonine-protein phosphatase 2B catalytic subunit 2
ame-miR-3730-5p	LOC411046	143	-20.57	411046	serine/threonine-protein phosphatase 2B catalytic subunit 2
ame-miR-3730-5p	LOC411046	143	-20.83	411046	serine/threonine-protein phosphatase 2B catalytic subunit 2
ame-miR-3730-5p	LOC411046	142	-21.39	411046	serine/threonine-protein phosphatase 2B catalytic subunit 2
ame-miR-3730-5p	LOC411046	141	-20.43	411046	serine/threonine-protein phosphatase 2B catalytic subunit 2
ame-miR-3730-5p	LOC411046	140	-21.12	411046	serine/threonine-protein phosphatase 2B catalytic subunit 2
ame-miR-3730-5p	LOC411046	140	-21.13	411046	serine/threonine-protein phosphatase 2B catalytic subunit 2
ame-miR-3730-5p	LOC411046	172	-24.35	411046	serine/threonine-protein phosphatase 2B catalytic subunit 2
ame-miR-3730-5p	LOC411046	159	-31.25	411046	serine/threonine-protein phosphatase 2B catalytic subunit 2
ame-miR-3730-5p	LOC411046	157	-20.75	411046	serine/threonine-protein phosphatase 2B catalytic subunit 2
ame-miR-3730-5p	LOC411046	156	-20.01	411046	serine/threonine-protein phosphatase 2B catalytic subunit 2
ame-miR-3730-5p	LOC411046	153	-21.64	411046	serine/threonine-protein phosphatase 2B catalytic subunit 2
ame-miR-3730-5p	LOC411046	153	-23.34	411046	serine/threonine-protein phosphatase 2B catalytic subunit 2
ame-miR-3730-5p	LOC411046	148	-20.34	411046	serine/threonine-protein phosphatase 2B catalytic subunit 2
ame-miR-3730-5p	LOC411046	147	-21.7	411046	serine/threonine-protein phosphatase 2B catalytic subunit 2
ame-miR-3730-5p	LOC411046	147	-20.79	411046	serine/threonine-protein phosphatase 2B catalytic subunit 2
ame-miR-3730-5p	LOC411046	145	-20.62	411046	serine/threonine-protein phosphatase 2B catalytic subunit 2
ame-miR-3730-5p	LOC411046	145	-21.26	411046	serine/threonine-protein phosphatase 2B catalytic subunit 2
ame-miR-3730-5p	LOC411046	143	-20.57	411046	serine/threonine-protein phosphatase 2B catalytic subunit 2
ame-miR-3730-5p	LOC411046	143	-20.83	411046	serine/threonine-protein phosphatase 2B catalytic subunit 2
ame-miR-3730-5p	LOC411046	142	-21.39	411046	serine/threonine-protein phosphatase 2B catalytic subunit 2
ame-miR-3730-5p	LOC411046	141	-20.43	411046	serine/threonine-protein phosphatase 2B catalytic subunit 2
ame-miR-3730-5p	LOC411046	140	-21.12	411046	serine/threonine-protein phosphatase 2B catalytic subunit 2
ame-miR-3730-5p	LOC411046	140	-21.13	411046	serine/threonine-protein phosphatase 2B catalytic subunit 2
ame-miR-3730-5p	LOC411046	153	-21.64	411046	serine/threonine-protein phosphatase 2B catalytic subunit 2
ame-miR-3730-5p	LOC411046	153	-23.34	411046	serine/threonine-protein phosphatase 2B catalytic subunit 2
ame-miR-3730-5p	LOC411046	148	-20.34	411046	serine/threonine-protein phosphatase 2B catalytic subunit 2
ame-miR-3730-5p	LOC411046	147	-20.79	411046	serine/threonine-protein phosphatase 2B catalytic subunit 2
ame-miR-3730-5p	LOC411046	143	-20.57	411046	serine/threonine-protein phosphatase 2B catalytic subunit 2
ame-miR-3730-5p	LOC411046	143	-20.83	411046	serine/threonine-protein phosphatase 2B catalytic subunit 2
ame-miR-3730-5p	LOC411046	142	-21.39	411046	serine/threonine-protein phosphatase 2B catalytic subunit 2
ame-miR-3730-5p	LOC411046	172	-24.35	411046	serine/threonine-protein phosphatase 2B catalytic subunit 2
ame-miR-3730-5p	LOC411046	159	-31.25	411046	serine/threonine-protein phosphatase 2B catalytic subunit 2
ame-miR-3730-5p	LOC411046	157	-20.75	411046	serine/threonine-protein phosphatase 2B catalytic subunit 2
ame-miR-3730-5p	LOC411046	156	-20.01	411046	serine/threonine-protein phosphatase 2B catalytic subunit 2
ame-miR-3730-5p	LOC411046	153	-21.64	411046	serine/threonine-protein phosphatase 2B catalytic subunit 2
ame-miR-3730-5p	LOC411046	153	-23.34	411046	serine/threonine-protein phosphatase 2B catalytic subunit 2
ame-miR-3730-5p	LOC411046	148	-20.34	411046	serine/threonine-protein phosphatase 2B catalytic subunit 2
ame-miR-3730-5p	LOC411046	147	-21.7	411046	serine/threonine-protein phosphatase 2B catalytic subunit 2
ame-miR-3730-5p	LOC411046	147	-20.79	411046	serine/threonine-protein phosphatase 2B catalytic subunit 2
ame-miR-3730-5p	LOC411046	145	-20.62	411046	serine/threonine-protein phosphatase 2B catalytic subunit 2
ame-miR-3730-5p	LOC411046	145	-21.26	411046	serine/threonine-protein phosphatase 2B catalytic subunit 2
ame-miR-3730-5p	LOC411046	143	-20.57	411046	serine/threonine-protein phosphatase 2B catalytic subunit 2
ame-miR-3730-5p	LOC411046	143	-20.83	411046	serine/threonine-protein phosphatase 2B catalytic subunit 2
ame-miR-3730-5p	LOC411046	142	-21.39	411046	serine/threonine-protein phosphatase 2B catalytic subunit 2
ame-miR-3730-5p	LOC411046	141	-20.43	411046	serine/threonine-protein phosphatase 2B catalytic subunit 2
ame-miR-3730-5p	LOC411046	140	-21.12	411046	serine/threonine-protein phosphatase 2B catalytic subunit 2
ame-miR-3730-5p	LOC411046	140	-21.13	411046	serine/threonine-protein phosphatase 2B catalytic subunit 2
ame-miR-3730-5p	LOC411046	172	-24.35	411046	serine/threonine-protein phosphatase 2B catalytic subunit 2
ame-miR-3730-5p	LOC411046	159	-31.25	411046	serine/threonine-protein phosphatase 2B catalytic subunit 2
ame-miR-3730-5p	LOC411046	157	-20.75	411046	serine/threonine-protein phosphatase 2B catalytic subunit 2
ame-miR-3730-5p	LOC411046	156	-20.01	411046	serine/threonine-protein phosphatase 2B catalytic subunit 2
ame-miR-3730-5p	LOC411046	153	-21.64	411046	serine/threonine-protein phosphatase 2B catalytic subunit 2
ame-miR-3730-5p	LOC411046	153	-23.34	411046	serine/threonine-protein phosphatase 2B catalytic subunit 2
ame-miR-3730-5p	LOC411046	148	-20.34	411046	serine/threonine-protein phosphatase 2B catalytic subunit 2
ame-miR-3730-5p	LOC411046	147	-21.7	411046	serine/threonine-protein phosphatase 2B catalytic subunit 2
ame-miR-3730-5p	LOC411046	147	-20.79	411046	serine/threonine-protein phosphatase 2B catalytic subunit 2
ame-miR-3730-5p	LOC411046	145	-20.62	411046	serine/threonine-protein phosphatase 2B catalytic subunit 2
ame-miR-3730-5p	LOC411046	145	-21.26	411046	serine/threonine-protein phosphatase 2B catalytic subunit 2
ame-miR-3730-5p	LOC411046	143	-20.57	411046	serine/threonine-protein phosphatase 2B catalytic subunit 2
ame-miR-3730-5p	LOC411046	143	-20.83	411046	serine/threonine-protein phosphatase 2B catalytic subunit 2
ame-miR-3730-5p	LOC411046	142	-21.39	411046	serine/threonine-protein phosphatase 2B catalytic subunit 2
ame-miR-3730-5p	LOC411046	141	-20.43	411046	serine/threonine-protein phosphatase 2B catalytic subunit 2
ame-miR-3730-5p	LOC411046	140	-21.12	411046	serine/threonine-protein phosphatase 2B catalytic subunit 2
ame-miR-3730-5p	LOC411046	140	-21.13	411046	serine/threonine-protein phosphatase 2B catalytic subunit 2
ame-miR-3730-5p	LOC411046	153	-21.64	411046	serine/threonine-protein phosphatase 2B catalytic subunit 2
ame-miR-3730-5p	LOC411046	153	-23.34	411046	serine/threonine-protein phosphatase 2B catalytic subunit 2
ame-miR-3730-5p	LOC411046	148	-20.34	411046	serine/threonine-protein phosphatase 2B catalytic subunit 2
ame-miR-3730-5p	LOC411046	147	-20.79	411046	serine/threonine-protein phosphatase 2B catalytic subunit 2
ame-miR-3730-5p	LOC411046	143	-20.57	411046	serine/threonine-protein phosphatase 2B catalytic subunit 2
ame-miR-3730-5p	LOC411046	143	-20.83	411046	serine/threonine-protein phosphatase 2B catalytic subunit 2
ame-miR-3730-5p	LOC411046	142	-21.39	411046	serine/threonine-protein phosphatase 2B catalytic subunit 2
ame-miR-3730-5p	LOC411046	172	-24.35	411046	serine/threonine-protein phosphatase 2B catalytic subunit 2
ame-miR-3730-5p	LOC411046	159	-31.25	411046	serine/threonine-protein phosphatase 2B catalytic subunit 2
ame-miR-3730-5p	LOC411046	157	-20.75	411046	serine/threonine-protein phosphatase 2B catalytic subunit 2
ame-miR-3730-5p	LOC411046	156	-20.01	411046	serine/threonine-protein phosphatase 2B catalytic subunit 2
ame-miR-3730-5p	LOC411046	153	-21.64	411046	serine/threonine-protein phosphatase 2B catalytic subunit 2
ame-miR-3730-5p	LOC411046	153	-23.34	411046	serine/threonine-protein phosphatase 2B catalytic subunit 2
ame-miR-3730-5p	LOC411046	148	-20.34	411046	serine/threonine-protein phosphatase 2B catalytic subunit 2
ame-miR-3730-5p	LOC411046	147	-21.7	411046	serine/threonine-protein phosphatase 2B catalytic subunit 2
ame-miR-3730-5p	LOC411046	147	-20.79	411046	serine/threonine-protein phosphatase 2B catalytic subunit 2
ame-miR-3730-5p	LOC411046	145	-20.62	411046	serine/threonine-protein phosphatase 2B catalytic subunit 2
ame-miR-3730-5p	LOC411046	145	-21.26	411046	serine/threonine-protein phosphatase 2B catalytic subunit 2
ame-miR-3730-5p	LOC411046	143	-20.57	411046	serine/threonine-protein phosphatase 2B catalytic subunit 2
ame-miR-3730-5p	LOC411046	143	-20.83	411046	serine/threonine-protein phosphatase 2B catalytic subunit 2
ame-miR-3730-5p	LOC411046	142	-21.39	411046	serine/threonine-protein phosphatase 2B catalytic subunit 2
ame-miR-3730-5p	LOC411046	141	-20.43	411046	serine/threonine-protein phosphatase 2B catalytic subunit 2
ame-miR-3730-5p	LOC411046	140	-21.12	411046	serine/threonine-protein phosphatase 2B catalytic subunit 2
ame-miR-3730-5p	LOC411046	140	-21.13	411046	serine/threonine-protein phosphatase 2B catalytic subunit 2
ame-miR-3730-5p	LOC411046	153	-23.34	411046	serine/threonine-protein phosphatase 2B catalytic subunit 2
ame-miR-3730-5p	LOC411046	148	-20.34	411046	serine/threonine-protein phosphatase 2B catalytic subunit 2
ame-miR-3730-5p	LOC411046	143	-20.57	411046	serine/threonine-protein phosphatase 2B catalytic subunit 2
ame-miR-3730-5p	LOC411046	143	-20.83	411046	serine/threonine-protein phosphatase 2B catalytic subunit 2
ame-miR-3730-5p	LOC411046	142	-21.39	411046	serine/threonine-protein phosphatase 2B catalytic subunit 2
ame-miR-3730-5p	LOC411046	172	-24.35	411046	serine/threonine-protein phosphatase 2B catalytic subunit 2
ame-miR-3730-5p	LOC411046	159	-31.25	411046	serine/threonine-protein phosphatase 2B catalytic subunit 2
ame-miR-3730-5p	LOC411046	157	-20.75	411046	serine/threonine-protein phosphatase 2B catalytic subunit 2
ame-miR-3730-5p	LOC411046	156	-20.01	411046	serine/threonine-protein phosphatase 2B catalytic subunit 2
ame-miR-3730-5p	LOC411046	153	-21.64	411046	serine/threonine-protein phosphatase 2B catalytic subunit 2
ame-miR-3730-5p	LOC411046	153	-23.34	411046	serine/threonine-protein phosphatase 2B catalytic subunit 2
ame-miR-3730-5p	LOC411046	148	-20.34	411046	serine/threonine-protein phosphatase 2B catalytic subunit 2
ame-miR-3730-5p	LOC411046	147	-21.7	411046	serine/threonine-protein phosphatase 2B catalytic subunit 2
ame-miR-3730-5p	LOC411046	147	-20.79	411046	serine/threonine-protein phosphatase 2B catalytic subunit 2
ame-miR-3730-5p	LOC411046	145	-20.62	411046	serine/threonine-protein phosphatase 2B catalytic subunit 2
ame-miR-3730-5p	LOC411046	145	-21.26	411046	serine/threonine-protein phosphatase 2B catalytic subunit 2
ame-miR-3730-5p	LOC411046	143	-20.57	411046	serine/threonine-protein phosphatase 2B catalytic subunit 2
ame-miR-3730-5p	LOC411046	143	-20.83	411046	serine/threonine-protein phosphatase 2B catalytic subunit 2
ame-miR-3730-5p	LOC411046	142	-21.39	411046	serine/threonine-protein phosphatase 2B catalytic subunit 2
ame-miR-3730-5p	LOC411046	141	-20.43	411046	serine/threonine-protein phosphatase 2B catalytic subunit 2
ame-miR-3730-5p	LOC411046	140	-21.12	411046	serine/threonine-protein phosphatase 2B catalytic subunit 2
ame-miR-3730-5p	LOC411046	140	-21.13	411046	serine/threonine-protein phosphatase 2B catalytic subunit 2
ame-miR-3730-5p	LOC411175	157	-24.22	411175	protein groucho
ame-miR-3730-5p	LOC411175	145	-20.54	411175	protein groucho
ame-miR-3730-5p	LOC411175	144	-25.94	411175	protein groucho
ame-miR-3730-5p	LOC411175	141	-25.9	411175	protein groucho
ame-miR-3730-5p	LOC411175	140	-22.29	411175	protein groucho
ame-miR-3730-5p	LOC411175	157	-24.22	411175	protein groucho
ame-miR-3730-5p	LOC411175	145	-20.54	411175	protein groucho
ame-miR-3730-5p	LOC411175	144	-25.94	411175	protein groucho
ame-miR-3730-5p	LOC411175	141	-25.9	411175	protein groucho
ame-miR-3730-5p	LOC411175	140	-23.08	411175	protein groucho
ame-miR-3730-5p	LOC411175	140	-22.29	411175	protein groucho
ame-miR-3730-5p	LOC411919	169	-23.89	411919	Wnt7 protein
ame-miR-3730-5p	LOC411919	159	-22.8	411919	Wnt7 protein
ame-miR-3730-5p	LOC411919	156	-23.88	411919	Wnt7 protein
ame-miR-3730-5p	LOC411919	149	-21.42	411919	Wnt7 protein
ame-miR-3730-5p	LOC411919	144	-20.33	411919	Wnt7 protein
ame-miR-3730-5p	LOC411919	143	-21.99	411919	Wnt7 protein
ame-miR-3730-5p	LOC411919	141	-21.18	411919	Wnt7 protein
ame-miR-3730-5p	LOC411919	159	-22.8	411919	Wnt7 protein
ame-miR-3730-5p	LOC411919	156	-23.88	411919	Wnt7 protein
ame-miR-3730-5p	LOC411919	149	-21.42	411919	Wnt7 protein
ame-miR-3730-5p	LOC411919	144	-20.33	411919	Wnt7 protein
ame-miR-3730-5p	LOC411919	143	-21.99	411919	Wnt7 protein
ame-miR-3730-5p	LOC411919	141	-21.18	411919	Wnt7 protein
ame-miR-3730-5p	LOC411919	159	-22.8	411919	Wnt7 protein
ame-miR-3730-5p	LOC411919	156	-23.88	411919	Wnt7 protein
ame-miR-3730-5p	LOC411919	144	-20.33	411919	Wnt7 protein
ame-miR-3730-5p	LOC411919	141	-21.18	411919	Wnt7 protein
ame-miR-3730-5p	LOC412108	141	-26.23	412108	casein kinase I
ame-miR-3730-5p	LOC412108	141	-26.23	412108	casein kinase I
ame-miR-3730-5p	LOC412108	141	-26.23	412108	casein kinase I
ame-miR-3730-5p	LOC412108	141	-26.23	412108	casein kinase I
ame-miR-3730-5p	LOC412108	141	-26.23	412108	casein kinase I
ame-miR-3730-5p	LOC413183	147	-23.02	413183	G1/S-specific cyclin-D2
ame-miR-3730-5p	LOC413183	146	-22.03	413183	G1/S-specific cyclin-D2
ame-miR-3730-5p	LOC413500	149	-22.07	413500	protein Wnt-10b
ame-miR-3730-5p	LOC413501	156	-21.92	413501	protein Wnt-6
ame-miR-3730-5p	LOC413501	151	-22.02	413501	protein Wnt-6
ame-miR-3730-5p	LOC413501	143	-21.02	413501	protein Wnt-6
ame-miR-3730-5p	LOC413501	141	-23.88	413501	protein Wnt-6
ame-miR-3730-5p	LOC413501	156	-21.92	413501	protein Wnt-6
ame-miR-3730-5p	LOC413501	151	-22.02	413501	protein Wnt-6
ame-miR-3730-5p	LOC413501	141	-23.88	413501	protein Wnt-6
ame-miR-3730-5p	LOC551124	141	-24.62	551124	frizzled-2
ame-miR-3730-5p	Camkii	169	-25.19	551691	calcium/calmodulin-dependent protein kinase II
ame-miR-3730-5p	Camkii	159	-21.9	551691	calcium/calmodulin-dependent protein kinase II
ame-miR-3730-5p	Camkii	155	-21.5	551691	calcium/calmodulin-dependent protein kinase II
ame-miR-3730-5p	Camkii	153	-25.77	551691	calcium/calmodulin-dependent protein kinase II
ame-miR-3730-5p	Camkii	152	-20.6	551691	calcium/calmodulin-dependent protein kinase II
ame-miR-3730-5p	Camkii	151	-22.61	551691	calcium/calmodulin-dependent protein kinase II
ame-miR-3730-5p	Camkii	147	-20.31	551691	calcium/calmodulin-dependent protein kinase II
ame-miR-3730-5p	Camkii	146	-21.48	551691	calcium/calmodulin-dependent protein kinase II
ame-miR-3730-5p	Camkii	144	-25.84	551691	calcium/calmodulin-dependent protein kinase II
ame-miR-3730-5p	Camkii	143	-20.06	551691	calcium/calmodulin-dependent protein kinase II
ame-miR-3730-5p	Camkii	143	-20.16	551691	calcium/calmodulin-dependent protein kinase II
ame-miR-3730-5p	Camkii	169	-25.19	551691	calcium/calmodulin-dependent protein kinase II
ame-miR-3730-5p	Camkii	159	-21.9	551691	calcium/calmodulin-dependent protein kinase II
ame-miR-3730-5p	Camkii	155	-21.5	551691	calcium/calmodulin-dependent protein kinase II
ame-miR-3730-5p	Camkii	153	-25.77	551691	calcium/calmodulin-dependent protein kinase II
ame-miR-3730-5p	Camkii	152	-20.6	551691	calcium/calmodulin-dependent protein kinase II
ame-miR-3730-5p	Camkii	151	-22.61	551691	calcium/calmodulin-dependent protein kinase II
ame-miR-3730-5p	Camkii	147	-20.31	551691	calcium/calmodulin-dependent protein kinase II
ame-miR-3730-5p	Camkii	146	-21.48	551691	calcium/calmodulin-dependent protein kinase II
ame-miR-3730-5p	Camkii	144	-25.84	551691	calcium/calmodulin-dependent protein kinase II
ame-miR-3730-5p	Camkii	143	-20.06	551691	calcium/calmodulin-dependent protein kinase II
ame-miR-3730-5p	Camkii	143	-20.16	551691	calcium/calmodulin-dependent protein kinase II
ame-miR-3730-5p	Camkii	169	-25.19	551691	calcium/calmodulin-dependent protein kinase II
ame-miR-3730-5p	Camkii	159	-21.9	551691	calcium/calmodulin-dependent protein kinase II
ame-miR-3730-5p	Camkii	155	-21.5	551691	calcium/calmodulin-dependent protein kinase II
ame-miR-3730-5p	Camkii	153	-25.77	551691	calcium/calmodulin-dependent protein kinase II
ame-miR-3730-5p	Camkii	152	-20.6	551691	calcium/calmodulin-dependent protein kinase II
ame-miR-3730-5p	Camkii	151	-22.61	551691	calcium/calmodulin-dependent protein kinase II
ame-miR-3730-5p	Camkii	147	-20.31	551691	calcium/calmodulin-dependent protein kinase II
ame-miR-3730-5p	Camkii	146	-21.48	551691	calcium/calmodulin-dependent protein kinase II
ame-miR-3730-5p	Camkii	144	-25.84	551691	calcium/calmodulin-dependent protein kinase II
ame-miR-3730-5p	Camkii	143	-20.06	551691	calcium/calmodulin-dependent protein kinase II
ame-miR-3730-5p	Camkii	143	-20.16	551691	calcium/calmodulin-dependent protein kinase II
ame-miR-3730-5p	Camkii	169	-25.19	551691	calcium/calmodulin-dependent protein kinase II
ame-miR-3730-5p	Camkii	159	-21.9	551691	calcium/calmodulin-dependent protein kinase II
ame-miR-3730-5p	Camkii	155	-21.5	551691	calcium/calmodulin-dependent protein kinase II
ame-miR-3730-5p	Camkii	153	-25.77	551691	calcium/calmodulin-dependent protein kinase II
ame-miR-3730-5p	Camkii	152	-20.6	551691	calcium/calmodulin-dependent protein kinase II
ame-miR-3730-5p	Camkii	151	-22.61	551691	calcium/calmodulin-dependent protein kinase II
ame-miR-3730-5p	Camkii	147	-20.31	551691	calcium/calmodulin-dependent protein kinase II
ame-miR-3730-5p	Camkii	146	-21.48	551691	calcium/calmodulin-dependent protein kinase II
ame-miR-3730-5p	Camkii	144	-25.84	551691	calcium/calmodulin-dependent protein kinase II
ame-miR-3730-5p	Camkii	143	-20.06	551691	calcium/calmodulin-dependent protein kinase II
ame-miR-3730-5p	Camkii	143	-20.16	551691	calcium/calmodulin-dependent protein kinase II
ame-miR-3730-5p	Camkii	169	-25.19	551691	calcium/calmodulin-dependent protein kinase II
ame-miR-3730-5p	Camkii	159	-21.9	551691	calcium/calmodulin-dependent protein kinase II
ame-miR-3730-5p	Camkii	155	-21.5	551691	calcium/calmodulin-dependent protein kinase II
ame-miR-3730-5p	Camkii	153	-25.77	551691	calcium/calmodulin-dependent protein kinase II
ame-miR-3730-5p	Camkii	152	-20.6	551691	calcium/calmodulin-dependent protein kinase II
ame-miR-3730-5p	Camkii	151	-22.61	551691	calcium/calmodulin-dependent protein kinase II
ame-miR-3730-5p	Camkii	147	-20.31	551691	calcium/calmodulin-dependent protein kinase II
ame-miR-3730-5p	Camkii	146	-21.48	551691	calcium/calmodulin-dependent protein kinase II
ame-miR-3730-5p	Camkii	144	-25.84	551691	calcium/calmodulin-dependent protein kinase II
ame-miR-3730-5p	Camkii	143	-20.06	551691	calcium/calmodulin-dependent protein kinase II
ame-miR-3730-5p	Camkii	143	-20.16	551691	calcium/calmodulin-dependent protein kinase II
ame-miR-3730-5p	Camkii	169	-25.19	551691	calcium/calmodulin-dependent protein kinase II
ame-miR-3730-5p	Camkii	159	-21.9	551691	calcium/calmodulin-dependent protein kinase II
ame-miR-3730-5p	Camkii	155	-21.5	551691	calcium/calmodulin-dependent protein kinase II
ame-miR-3730-5p	Camkii	153	-25.77	551691	calcium/calmodulin-dependent protein kinase II
ame-miR-3730-5p	Camkii	152	-20.6	551691	calcium/calmodulin-dependent protein kinase II
ame-miR-3730-5p	Camkii	151	-22.61	551691	calcium/calmodulin-dependent protein kinase II
ame-miR-3730-5p	Camkii	147	-20.31	551691	calcium/calmodulin-dependent protein kinase II
ame-miR-3730-5p	Camkii	146	-21.48	551691	calcium/calmodulin-dependent protein kinase II
ame-miR-3730-5p	Camkii	144	-25.84	551691	calcium/calmodulin-dependent protein kinase II
ame-miR-3730-5p	Camkii	143	-20.06	551691	calcium/calmodulin-dependent protein kinase II
ame-miR-3730-5p	Camkii	143	-20.16	551691	calcium/calmodulin-dependent protein kinase II
ame-miR-3730-5p	Camkii	169	-25.19	551691	calcium/calmodulin-dependent protein kinase II
ame-miR-3730-5p	Camkii	159	-21.9	551691	calcium/calmodulin-dependent protein kinase II
ame-miR-3730-5p	Camkii	155	-21.5	551691	calcium/calmodulin-dependent protein kinase II
ame-miR-3730-5p	Camkii	153	-25.77	551691	calcium/calmodulin-dependent protein kinase II
ame-miR-3730-5p	Camkii	152	-20.6	551691	calcium/calmodulin-dependent protein kinase II
ame-miR-3730-5p	Camkii	151	-22.61	551691	calcium/calmodulin-dependent protein kinase II
ame-miR-3730-5p	Camkii	147	-20.31	551691	calcium/calmodulin-dependent protein kinase II
ame-miR-3730-5p	Camkii	146	-21.48	551691	calcium/calmodulin-dependent protein kinase II
ame-miR-3730-5p	Camkii	144	-25.84	551691	calcium/calmodulin-dependent protein kinase II
ame-miR-3730-5p	Camkii	143	-20.06	551691	calcium/calmodulin-dependent protein kinase II
ame-miR-3730-5p	Camkii	143	-20.16	551691	calcium/calmodulin-dependent protein kinase II
ame-miR-3730-5p	Camkii	169	-25.19	551691	calcium/calmodulin-dependent protein kinase II
ame-miR-3730-5p	Camkii	159	-21.9	551691	calcium/calmodulin-dependent protein kinase II
ame-miR-3730-5p	Camkii	155	-21.5	551691	calcium/calmodulin-dependent protein kinase II
ame-miR-3730-5p	Camkii	153	-25.77	551691	calcium/calmodulin-dependent protein kinase II
ame-miR-3730-5p	Camkii	152	-20.6	551691	calcium/calmodulin-dependent protein kinase II
ame-miR-3730-5p	Camkii	151	-22.61	551691	calcium/calmodulin-dependent protein kinase II
ame-miR-3730-5p	Camkii	147	-20.31	551691	calcium/calmodulin-dependent protein kinase II
ame-miR-3730-5p	Camkii	146	-21.48	551691	calcium/calmodulin-dependent protein kinase II
ame-miR-3730-5p	Camkii	144	-25.84	551691	calcium/calmodulin-dependent protein kinase II
ame-miR-3730-5p	Camkii	143	-20.06	551691	calcium/calmodulin-dependent protein kinase II
ame-miR-3730-5p	Camkii	143	-20.16	551691	calcium/calmodulin-dependent protein kinase II
ame-miR-3730-5p	Camkii	169	-25.19	551691	calcium/calmodulin-dependent protein kinase II
ame-miR-3730-5p	Camkii	159	-21.9	551691	calcium/calmodulin-dependent protein kinase II
ame-miR-3730-5p	Camkii	155	-21.5	551691	calcium/calmodulin-dependent protein kinase II
ame-miR-3730-5p	Camkii	153	-25.77	551691	calcium/calmodulin-dependent protein kinase II
ame-miR-3730-5p	Camkii	152	-20.6	551691	calcium/calmodulin-dependent protein kinase II
ame-miR-3730-5p	Camkii	151	-22.61	551691	calcium/calmodulin-dependent protein kinase II
ame-miR-3730-5p	Camkii	147	-20.31	551691	calcium/calmodulin-dependent protein kinase II
ame-miR-3730-5p	Camkii	146	-21.48	551691	calcium/calmodulin-dependent protein kinase II
ame-miR-3730-5p	Camkii	144	-25.84	551691	calcium/calmodulin-dependent protein kinase II
ame-miR-3730-5p	Camkii	143	-20.06	551691	calcium/calmodulin-dependent protein kinase II
ame-miR-3730-5p	Camkii	143	-20.16	551691	calcium/calmodulin-dependent protein kinase II
ame-miR-3730-5p	Camkii	169	-25.19	551691	calcium/calmodulin-dependent protein kinase II
ame-miR-3730-5p	Camkii	159	-21.9	551691	calcium/calmodulin-dependent protein kinase II
ame-miR-3730-5p	Camkii	155	-21.5	551691	calcium/calmodulin-dependent protein kinase II
ame-miR-3730-5p	Camkii	153	-25.77	551691	calcium/calmodulin-dependent protein kinase II
ame-miR-3730-5p	Camkii	152	-20.6	551691	calcium/calmodulin-dependent protein kinase II
ame-miR-3730-5p	Camkii	151	-22.61	551691	calcium/calmodulin-dependent protein kinase II
ame-miR-3730-5p	Camkii	147	-20.31	551691	calcium/calmodulin-dependent protein kinase II
ame-miR-3730-5p	Camkii	146	-21.48	551691	calcium/calmodulin-dependent protein kinase II
ame-miR-3730-5p	Camkii	144	-25.84	551691	calcium/calmodulin-dependent protein kinase II
ame-miR-3730-5p	Camkii	143	-20.06	551691	calcium/calmodulin-dependent protein kinase II
ame-miR-3730-5p	Camkii	143	-20.16	551691	calcium/calmodulin-dependent protein kinase II
ame-miR-3730-5p	Camkii	169	-25.19	551691	calcium/calmodulin-dependent protein kinase II
ame-miR-3730-5p	Camkii	159	-21.9	551691	calcium/calmodulin-dependent protein kinase II
ame-miR-3730-5p	Camkii	155	-21.5	551691	calcium/calmodulin-dependent protein kinase II
ame-miR-3730-5p	Camkii	153	-25.77	551691	calcium/calmodulin-dependent protein kinase II
ame-miR-3730-5p	Camkii	152	-20.6	551691	calcium/calmodulin-dependent protein kinase II
ame-miR-3730-5p	Camkii	151	-22.61	551691	calcium/calmodulin-dependent protein kinase II
ame-miR-3730-5p	Camkii	147	-20.31	551691	calcium/calmodulin-dependent protein kinase II
ame-miR-3730-5p	Camkii	146	-21.48	551691	calcium/calmodulin-dependent protein kinase II
ame-miR-3730-5p	Camkii	144	-25.84	551691	calcium/calmodulin-dependent protein kinase II
ame-miR-3730-5p	Camkii	143	-20.06	551691	calcium/calmodulin-dependent protein kinase II
ame-miR-3730-5p	Camkii	143	-20.16	551691	calcium/calmodulin-dependent protein kinase II
ame-miR-3730-5p	Camkii	169	-25.19	551691	calcium/calmodulin-dependent protein kinase II
ame-miR-3730-5p	Camkii	159	-21.9	551691	calcium/calmodulin-dependent protein kinase II
ame-miR-3730-5p	Camkii	155	-21.5	551691	calcium/calmodulin-dependent protein kinase II
ame-miR-3730-5p	Camkii	153	-25.77	551691	calcium/calmodulin-dependent protein kinase II
ame-miR-3730-5p	Camkii	152	-20.6	551691	calcium/calmodulin-dependent protein kinase II
ame-miR-3730-5p	Camkii	151	-22.61	551691	calcium/calmodulin-dependent protein kinase II
ame-miR-3730-5p	Camkii	147	-20.31	551691	calcium/calmodulin-dependent protein kinase II
ame-miR-3730-5p	Camkii	146	-21.48	551691	calcium/calmodulin-dependent protein kinase II
ame-miR-3730-5p	Camkii	144	-25.84	551691	calcium/calmodulin-dependent protein kinase II
ame-miR-3730-5p	Camkii	143	-20.06	551691	calcium/calmodulin-dependent protein kinase II
ame-miR-3730-5p	Camkii	143	-20.16	551691	calcium/calmodulin-dependent protein kinase II
ame-miR-3730-5p	Camkii	169	-25.19	551691	calcium/calmodulin-dependent protein kinase II
ame-miR-3730-5p	Camkii	159	-21.9	551691	calcium/calmodulin-dependent protein kinase II
ame-miR-3730-5p	Camkii	155	-21.5	551691	calcium/calmodulin-dependent protein kinase II
ame-miR-3730-5p	Camkii	153	-25.77	551691	calcium/calmodulin-dependent protein kinase II
ame-miR-3730-5p	Camkii	152	-20.6	551691	calcium/calmodulin-dependent protein kinase II
ame-miR-3730-5p	Camkii	151	-22.61	551691	calcium/calmodulin-dependent protein kinase II
ame-miR-3730-5p	Camkii	147	-20.31	551691	calcium/calmodulin-dependent protein kinase II
ame-miR-3730-5p	Camkii	146	-21.48	551691	calcium/calmodulin-dependent protein kinase II
ame-miR-3730-5p	Camkii	144	-25.84	551691	calcium/calmodulin-dependent protein kinase II
ame-miR-3730-5p	Camkii	143	-20.06	551691	calcium/calmodulin-dependent protein kinase II
ame-miR-3730-5p	Camkii	143	-20.16	551691	calcium/calmodulin-dependent protein kinase II
ame-miR-3730-5p	Camkii	169	-25.19	551691	calcium/calmodulin-dependent protein kinase II
ame-miR-3730-5p	Camkii	159	-21.9	551691	calcium/calmodulin-dependent protein kinase II
ame-miR-3730-5p	Camkii	155	-21.5	551691	calcium/calmodulin-dependent protein kinase II
ame-miR-3730-5p	Camkii	153	-25.77	551691	calcium/calmodulin-dependent protein kinase II
ame-miR-3730-5p	Camkii	152	-20.6	551691	calcium/calmodulin-dependent protein kinase II
ame-miR-3730-5p	Camkii	151	-22.61	551691	calcium/calmodulin-dependent protein kinase II
ame-miR-3730-5p	Camkii	147	-20.31	551691	calcium/calmodulin-dependent protein kinase II
ame-miR-3730-5p	Camkii	146	-21.48	551691	calcium/calmodulin-dependent protein kinase II
ame-miR-3730-5p	Camkii	144	-25.84	551691	calcium/calmodulin-dependent protein kinase II
ame-miR-3730-5p	Camkii	143	-20.06	551691	calcium/calmodulin-dependent protein kinase II
ame-miR-3730-5p	Camkii	143	-20.16	551691	calcium/calmodulin-dependent protein kinase II
ame-miR-3730-5p	Camkii	169	-25.19	551691	calcium/calmodulin-dependent protein kinase II
ame-miR-3730-5p	Camkii	159	-21.9	551691	calcium/calmodulin-dependent protein kinase II
ame-miR-3730-5p	Camkii	155	-21.5	551691	calcium/calmodulin-dependent protein kinase II
ame-miR-3730-5p	Camkii	153	-25.77	551691	calcium/calmodulin-dependent protein kinase II
ame-miR-3730-5p	Camkii	152	-20.6	551691	calcium/calmodulin-dependent protein kinase II
ame-miR-3730-5p	Camkii	151	-22.61	551691	calcium/calmodulin-dependent protein kinase II
ame-miR-3730-5p	Camkii	147	-20.31	551691	calcium/calmodulin-dependent protein kinase II
ame-miR-3730-5p	Camkii	146	-21.48	551691	calcium/calmodulin-dependent protein kinase II
ame-miR-3730-5p	Camkii	144	-25.84	551691	calcium/calmodulin-dependent protein kinase II
ame-miR-3730-5p	Camkii	143	-20.06	551691	calcium/calmodulin-dependent protein kinase II
ame-miR-3730-5p	Camkii	143	-20.16	551691	calcium/calmodulin-dependent protein kinase II
ame-miR-3730-5p	Camkii	169	-25.19	551691	calcium/calmodulin-dependent protein kinase II
ame-miR-3730-5p	Camkii	159	-21.9	551691	calcium/calmodulin-dependent protein kinase II
ame-miR-3730-5p	Camkii	155	-21.5	551691	calcium/calmodulin-dependent protein kinase II
ame-miR-3730-5p	Camkii	153	-25.77	551691	calcium/calmodulin-dependent protein kinase II
ame-miR-3730-5p	Camkii	152	-20.6	551691	calcium/calmodulin-dependent protein kinase II
ame-miR-3730-5p	Camkii	151	-22.61	551691	calcium/calmodulin-dependent protein kinase II
ame-miR-3730-5p	Camkii	147	-20.31	551691	calcium/calmodulin-dependent protein kinase II
ame-miR-3730-5p	Camkii	146	-21.48	551691	calcium/calmodulin-dependent protein kinase II
ame-miR-3730-5p	Camkii	144	-25.84	551691	calcium/calmodulin-dependent protein kinase II
ame-miR-3730-5p	Camkii	143	-20.06	551691	calcium/calmodulin-dependent protein kinase II
ame-miR-3730-5p	Camkii	143	-20.16	551691	calcium/calmodulin-dependent protein kinase II
ame-miR-3730-5p	Camkii	169	-25.19	551691	calcium/calmodulin-dependent protein kinase II
ame-miR-3730-5p	Camkii	159	-21.9	551691	calcium/calmodulin-dependent protein kinase II
ame-miR-3730-5p	Camkii	155	-21.5	551691	calcium/calmodulin-dependent protein kinase II
ame-miR-3730-5p	Camkii	153	-25.77	551691	calcium/calmodulin-dependent protein kinase II
ame-miR-3730-5p	Camkii	152	-20.6	551691	calcium/calmodulin-dependent protein kinase II
ame-miR-3730-5p	Camkii	151	-22.61	551691	calcium/calmodulin-dependent protein kinase II
ame-miR-3730-5p	Camkii	147	-20.31	551691	calcium/calmodulin-dependent protein kinase II
ame-miR-3730-5p	Camkii	146	-21.48	551691	calcium/calmodulin-dependent protein kinase II
ame-miR-3730-5p	Camkii	144	-25.84	551691	calcium/calmodulin-dependent protein kinase II
ame-miR-3730-5p	Camkii	143	-20.06	551691	calcium/calmodulin-dependent protein kinase II
ame-miR-3730-5p	Camkii	143	-20.16	551691	calcium/calmodulin-dependent protein kinase II
ame-miR-3730-5p	Camkii	169	-25.19	551691	calcium/calmodulin-dependent protein kinase II
ame-miR-3730-5p	Camkii	159	-21.9	551691	calcium/calmodulin-dependent protein kinase II
ame-miR-3730-5p	Camkii	155	-21.5	551691	calcium/calmodulin-dependent protein kinase II
ame-miR-3730-5p	Camkii	153	-25.77	551691	calcium/calmodulin-dependent protein kinase II
ame-miR-3730-5p	Camkii	152	-20.6	551691	calcium/calmodulin-dependent protein kinase II
ame-miR-3730-5p	Camkii	151	-22.61	551691	calcium/calmodulin-dependent protein kinase II
ame-miR-3730-5p	Camkii	147	-20.31	551691	calcium/calmodulin-dependent protein kinase II
ame-miR-3730-5p	Camkii	146	-21.48	551691	calcium/calmodulin-dependent protein kinase II
ame-miR-3730-5p	Camkii	144	-25.84	551691	calcium/calmodulin-dependent protein kinase II
ame-miR-3730-5p	Camkii	143	-20.06	551691	calcium/calmodulin-dependent protein kinase II
ame-miR-3730-5p	Camkii	143	-20.16	551691	calcium/calmodulin-dependent protein kinase II
ame-miR-3730-5p	Camkii	169	-25.19	551691	calcium/calmodulin-dependent protein kinase II
ame-miR-3730-5p	Camkii	159	-21.9	551691	calcium/calmodulin-dependent protein kinase II
ame-miR-3730-5p	Camkii	155	-21.5	551691	calcium/calmodulin-dependent protein kinase II
ame-miR-3730-5p	Camkii	153	-25.77	551691	calcium/calmodulin-dependent protein kinase II
ame-miR-3730-5p	Camkii	152	-20.6	551691	calcium/calmodulin-dependent protein kinase II
ame-miR-3730-5p	Camkii	151	-22.61	551691	calcium/calmodulin-dependent protein kinase II
ame-miR-3730-5p	Camkii	147	-20.31	551691	calcium/calmodulin-dependent protein kinase II
ame-miR-3730-5p	Camkii	146	-21.48	551691	calcium/calmodulin-dependent protein kinase II
ame-miR-3730-5p	Camkii	144	-25.84	551691	calcium/calmodulin-dependent protein kinase II
ame-miR-3730-5p	Camkii	143	-20.06	551691	calcium/calmodulin-dependent protein kinase II
ame-miR-3730-5p	Camkii	143	-20.16	551691	calcium/calmodulin-dependent protein kinase II
ame-miR-3730-5p	Camkii	169	-25.19	551691	calcium/calmodulin-dependent protein kinase II
ame-miR-3730-5p	Camkii	159	-21.9	551691	calcium/calmodulin-dependent protein kinase II
ame-miR-3730-5p	Camkii	155	-21.5	551691	calcium/calmodulin-dependent protein kinase II
ame-miR-3730-5p	Camkii	153	-25.77	551691	calcium/calmodulin-dependent protein kinase II
ame-miR-3730-5p	Camkii	152	-20.6	551691	calcium/calmodulin-dependent protein kinase II
ame-miR-3730-5p	Camkii	151	-22.61	551691	calcium/calmodulin-dependent protein kinase II
ame-miR-3730-5p	Camkii	147	-20.31	551691	calcium/calmodulin-dependent protein kinase II
ame-miR-3730-5p	Camkii	146	-21.48	551691	calcium/calmodulin-dependent protein kinase II
ame-miR-3730-5p	Camkii	144	-25.84	551691	calcium/calmodulin-dependent protein kinase II
ame-miR-3730-5p	Camkii	143	-20.06	551691	calcium/calmodulin-dependent protein kinase II
ame-miR-3730-5p	Camkii	143	-20.16	551691	calcium/calmodulin-dependent protein kinase II
ame-miR-3730-5p	Camkii	169	-25.19	551691	calcium/calmodulin-dependent protein kinase II
ame-miR-3730-5p	Camkii	159	-21.9	551691	calcium/calmodulin-dependent protein kinase II
ame-miR-3730-5p	Camkii	155	-21.5	551691	calcium/calmodulin-dependent protein kinase II
ame-miR-3730-5p	Camkii	153	-25.77	551691	calcium/calmodulin-dependent protein kinase II
ame-miR-3730-5p	Camkii	152	-20.6	551691	calcium/calmodulin-dependent protein kinase II
ame-miR-3730-5p	Camkii	151	-22.61	551691	calcium/calmodulin-dependent protein kinase II
ame-miR-3730-5p	Camkii	147	-20.31	551691	calcium/calmodulin-dependent protein kinase II
ame-miR-3730-5p	Camkii	146	-21.48	551691	calcium/calmodulin-dependent protein kinase II
ame-miR-3730-5p	Camkii	144	-25.84	551691	calcium/calmodulin-dependent protein kinase II
ame-miR-3730-5p	Camkii	143	-20.06	551691	calcium/calmodulin-dependent protein kinase II
ame-miR-3730-5p	Camkii	143	-20.16	551691	calcium/calmodulin-dependent protein kinase II
ame-miR-3730-5p	Camkii	169	-25.19	551691	calcium/calmodulin-dependent protein kinase II
ame-miR-3730-5p	Camkii	159	-21.9	551691	calcium/calmodulin-dependent protein kinase II
ame-miR-3730-5p	Camkii	155	-21.5	551691	calcium/calmodulin-dependent protein kinase II
ame-miR-3730-5p	Camkii	153	-25.77	551691	calcium/calmodulin-dependent protein kinase II
ame-miR-3730-5p	Camkii	152	-20.6	551691	calcium/calmodulin-dependent protein kinase II
ame-miR-3730-5p	Camkii	151	-22.61	551691	calcium/calmodulin-dependent protein kinase II
ame-miR-3730-5p	Camkii	147	-20.31	551691	calcium/calmodulin-dependent protein kinase II
ame-miR-3730-5p	Camkii	146	-21.48	551691	calcium/calmodulin-dependent protein kinase II
ame-miR-3730-5p	Camkii	144	-25.84	551691	calcium/calmodulin-dependent protein kinase II
ame-miR-3730-5p	Camkii	143	-20.06	551691	calcium/calmodulin-dependent protein kinase II
ame-miR-3730-5p	Camkii	143	-20.16	551691	calcium/calmodulin-dependent protein kinase II
ame-miR-3730-5p	Camkii	169	-25.19	551691	calcium/calmodulin-dependent protein kinase II
ame-miR-3730-5p	Camkii	159	-21.9	551691	calcium/calmodulin-dependent protein kinase II
ame-miR-3730-5p	Camkii	155	-21.5	551691	calcium/calmodulin-dependent protein kinase II
ame-miR-3730-5p	Camkii	153	-25.77	551691	calcium/calmodulin-dependent protein kinase II
ame-miR-3730-5p	Camkii	152	-20.6	551691	calcium/calmodulin-dependent protein kinase II
ame-miR-3730-5p	Camkii	151	-22.61	551691	calcium/calmodulin-dependent protein kinase II
ame-miR-3730-5p	Camkii	147	-20.31	551691	calcium/calmodulin-dependent protein kinase II
ame-miR-3730-5p	Camkii	146	-21.48	551691	calcium/calmodulin-dependent protein kinase II
ame-miR-3730-5p	Camkii	144	-25.84	551691	calcium/calmodulin-dependent protein kinase II
ame-miR-3730-5p	Camkii	143	-20.06	551691	calcium/calmodulin-dependent protein kinase II
ame-miR-3730-5p	Camkii	143	-20.16	551691	calcium/calmodulin-dependent protein kinase II
ame-miR-3730-5p	Camkii	169	-25.19	551691	calcium/calmodulin-dependent protein kinase II
ame-miR-3730-5p	Camkii	159	-21.9	551691	calcium/calmodulin-dependent protein kinase II
ame-miR-3730-5p	Camkii	155	-21.5	551691	calcium/calmodulin-dependent protein kinase II
ame-miR-3730-5p	Camkii	153	-25.77	551691	calcium/calmodulin-dependent protein kinase II
ame-miR-3730-5p	Camkii	152	-20.6	551691	calcium/calmodulin-dependent protein kinase II
ame-miR-3730-5p	Camkii	151	-22.61	551691	calcium/calmodulin-dependent protein kinase II
ame-miR-3730-5p	Camkii	147	-20.31	551691	calcium/calmodulin-dependent protein kinase II
ame-miR-3730-5p	Camkii	146	-21.48	551691	calcium/calmodulin-dependent protein kinase II
ame-miR-3730-5p	Camkii	144	-25.84	551691	calcium/calmodulin-dependent protein kinase II
ame-miR-3730-5p	Camkii	143	-20.06	551691	calcium/calmodulin-dependent protein kinase II
ame-miR-3730-5p	Camkii	143	-20.16	551691	calcium/calmodulin-dependent protein kinase II
ame-miR-3730-5p	Camkii	169	-25.19	551691	calcium/calmodulin-dependent protein kinase II
ame-miR-3730-5p	Camkii	159	-21.9	551691	calcium/calmodulin-dependent protein kinase II
ame-miR-3730-5p	Camkii	155	-21.5	551691	calcium/calmodulin-dependent protein kinase II
ame-miR-3730-5p	Camkii	153	-25.77	551691	calcium/calmodulin-dependent protein kinase II
ame-miR-3730-5p	Camkii	152	-20.6	551691	calcium/calmodulin-dependent protein kinase II
ame-miR-3730-5p	Camkii	151	-22.61	551691	calcium/calmodulin-dependent protein kinase II
ame-miR-3730-5p	Camkii	147	-20.31	551691	calcium/calmodulin-dependent protein kinase II
ame-miR-3730-5p	Camkii	146	-21.48	551691	calcium/calmodulin-dependent protein kinase II
ame-miR-3730-5p	Camkii	144	-25.84	551691	calcium/calmodulin-dependent protein kinase II
ame-miR-3730-5p	Camkii	143	-20.06	551691	calcium/calmodulin-dependent protein kinase II
ame-miR-3730-5p	Camkii	143	-20.16	551691	calcium/calmodulin-dependent protein kinase II
ame-miR-3730-5p	Camkii	169	-25.19	551691	calcium/calmodulin-dependent protein kinase II
ame-miR-3730-5p	Camkii	159	-21.9	551691	calcium/calmodulin-dependent protein kinase II
ame-miR-3730-5p	Camkii	155	-21.5	551691	calcium/calmodulin-dependent protein kinase II
ame-miR-3730-5p	Camkii	153	-25.77	551691	calcium/calmodulin-dependent protein kinase II
ame-miR-3730-5p	Camkii	152	-20.6	551691	calcium/calmodulin-dependent protein kinase II
ame-miR-3730-5p	Camkii	151	-22.61	551691	calcium/calmodulin-dependent protein kinase II
ame-miR-3730-5p	Camkii	147	-20.31	551691	calcium/calmodulin-dependent protein kinase II
ame-miR-3730-5p	Camkii	146	-21.48	551691	calcium/calmodulin-dependent protein kinase II
ame-miR-3730-5p	Camkii	144	-25.84	551691	calcium/calmodulin-dependent protein kinase II
ame-miR-3730-5p	Camkii	143	-20.06	551691	calcium/calmodulin-dependent protein kinase II
ame-miR-3730-5p	Camkii	143	-20.16	551691	calcium/calmodulin-dependent protein kinase II
ame-miR-3730-5p	Camkii	169	-25.19	551691	calcium/calmodulin-dependent protein kinase II
ame-miR-3730-5p	Camkii	159	-21.9	551691	calcium/calmodulin-dependent protein kinase II
ame-miR-3730-5p	Camkii	155	-21.5	551691	calcium/calmodulin-dependent protein kinase II
ame-miR-3730-5p	Camkii	153	-25.77	551691	calcium/calmodulin-dependent protein kinase II
ame-miR-3730-5p	Camkii	152	-20.6	551691	calcium/calmodulin-dependent protein kinase II
ame-miR-3730-5p	Camkii	151	-22.61	551691	calcium/calmodulin-dependent protein kinase II
ame-miR-3730-5p	Camkii	147	-20.31	551691	calcium/calmodulin-dependent protein kinase II
ame-miR-3730-5p	Camkii	146	-21.48	551691	calcium/calmodulin-dependent protein kinase II
ame-miR-3730-5p	Camkii	144	-25.84	551691	calcium/calmodulin-dependent protein kinase II
ame-miR-3730-5p	Camkii	143	-20.06	551691	calcium/calmodulin-dependent protein kinase II
ame-miR-3730-5p	Camkii	143	-20.16	551691	calcium/calmodulin-dependent protein kinase II
ame-miR-3730-5p	Camkii	169	-25.19	551691	calcium/calmodulin-dependent protein kinase II
ame-miR-3730-5p	Camkii	159	-21.9	551691	calcium/calmodulin-dependent protein kinase II
ame-miR-3730-5p	Camkii	155	-21.5	551691	calcium/calmodulin-dependent protein kinase II
ame-miR-3730-5p	Camkii	153	-25.77	551691	calcium/calmodulin-dependent protein kinase II
ame-miR-3730-5p	Camkii	152	-20.6	551691	calcium/calmodulin-dependent protein kinase II
ame-miR-3730-5p	Camkii	151	-22.61	551691	calcium/calmodulin-dependent protein kinase II
ame-miR-3730-5p	Camkii	147	-20.31	551691	calcium/calmodulin-dependent protein kinase II
ame-miR-3730-5p	Camkii	146	-21.48	551691	calcium/calmodulin-dependent protein kinase II
ame-miR-3730-5p	Camkii	144	-25.84	551691	calcium/calmodulin-dependent protein kinase II
ame-miR-3730-5p	Camkii	143	-20.06	551691	calcium/calmodulin-dependent protein kinase II
ame-miR-3730-5p	Camkii	143	-20.16	551691	calcium/calmodulin-dependent protein kinase II
ame-miR-3730-5p	Camkii	169	-25.19	551691	calcium/calmodulin-dependent protein kinase II
ame-miR-3730-5p	Camkii	159	-21.9	551691	calcium/calmodulin-dependent protein kinase II
ame-miR-3730-5p	Camkii	155	-21.5	551691	calcium/calmodulin-dependent protein kinase II
ame-miR-3730-5p	Camkii	153	-25.77	551691	calcium/calmodulin-dependent protein kinase II
ame-miR-3730-5p	Camkii	152	-20.6	551691	calcium/calmodulin-dependent protein kinase II
ame-miR-3730-5p	Camkii	151	-22.61	551691	calcium/calmodulin-dependent protein kinase II
ame-miR-3730-5p	Camkii	147	-20.31	551691	calcium/calmodulin-dependent protein kinase II
ame-miR-3730-5p	Camkii	146	-21.48	551691	calcium/calmodulin-dependent protein kinase II
ame-miR-3730-5p	Camkii	144	-25.84	551691	calcium/calmodulin-dependent protein kinase II
ame-miR-3730-5p	Camkii	143	-20.06	551691	calcium/calmodulin-dependent protein kinase II
ame-miR-3730-5p	Camkii	143	-20.16	551691	calcium/calmodulin-dependent protein kinase II
ame-miR-3730-5p	Camkii	169	-25.19	551691	calcium/calmodulin-dependent protein kinase II
ame-miR-3730-5p	Camkii	159	-21.9	551691	calcium/calmodulin-dependent protein kinase II
ame-miR-3730-5p	Camkii	155	-21.5	551691	calcium/calmodulin-dependent protein kinase II
ame-miR-3730-5p	Camkii	153	-25.77	551691	calcium/calmodulin-dependent protein kinase II
ame-miR-3730-5p	Camkii	152	-20.6	551691	calcium/calmodulin-dependent protein kinase II
ame-miR-3730-5p	Camkii	151	-22.61	551691	calcium/calmodulin-dependent protein kinase II
ame-miR-3730-5p	Camkii	147	-20.31	551691	calcium/calmodulin-dependent protein kinase II
ame-miR-3730-5p	Camkii	146	-21.48	551691	calcium/calmodulin-dependent protein kinase II
ame-miR-3730-5p	Camkii	144	-25.84	551691	calcium/calmodulin-dependent protein kinase II
ame-miR-3730-5p	Camkii	143	-20.06	551691	calcium/calmodulin-dependent protein kinase II
ame-miR-3730-5p	Camkii	143	-20.16	551691	calcium/calmodulin-dependent protein kinase II
ame-miR-3730-5p	Camkii	169	-25.19	551691	calcium/calmodulin-dependent protein kinase II
ame-miR-3730-5p	Camkii	159	-21.9	551691	calcium/calmodulin-dependent protein kinase II
ame-miR-3730-5p	Camkii	155	-21.5	551691	calcium/calmodulin-dependent protein kinase II
ame-miR-3730-5p	Camkii	153	-25.77	551691	calcium/calmodulin-dependent protein kinase II
ame-miR-3730-5p	Camkii	152	-20.6	551691	calcium/calmodulin-dependent protein kinase II
ame-miR-3730-5p	Camkii	151	-22.61	551691	calcium/calmodulin-dependent protein kinase II
ame-miR-3730-5p	Camkii	147	-20.31	551691	calcium/calmodulin-dependent protein kinase II
ame-miR-3730-5p	Camkii	146	-21.48	551691	calcium/calmodulin-dependent protein kinase II
ame-miR-3730-5p	Camkii	144	-25.84	551691	calcium/calmodulin-dependent protein kinase II
ame-miR-3730-5p	Camkii	143	-20.06	551691	calcium/calmodulin-dependent protein kinase II
ame-miR-3730-5p	Camkii	143	-20.16	551691	calcium/calmodulin-dependent protein kinase II
ame-miR-3730-5p	Camkii	169	-25.19	551691	calcium/calmodulin-dependent protein kinase II
ame-miR-3730-5p	Camkii	159	-21.9	551691	calcium/calmodulin-dependent protein kinase II
ame-miR-3730-5p	Camkii	155	-21.5	551691	calcium/calmodulin-dependent protein kinase II
ame-miR-3730-5p	Camkii	153	-25.77	551691	calcium/calmodulin-dependent protein kinase II
ame-miR-3730-5p	Camkii	152	-20.6	551691	calcium/calmodulin-dependent protein kinase II
ame-miR-3730-5p	Camkii	151	-22.61	551691	calcium/calmodulin-dependent protein kinase II
ame-miR-3730-5p	Camkii	147	-20.31	551691	calcium/calmodulin-dependent protein kinase II
ame-miR-3730-5p	Camkii	146	-21.48	551691	calcium/calmodulin-dependent protein kinase II
ame-miR-3730-5p	Camkii	144	-25.84	551691	calcium/calmodulin-dependent protein kinase II
ame-miR-3730-5p	Camkii	143	-20.06	551691	calcium/calmodulin-dependent protein kinase II
ame-miR-3730-5p	Camkii	143	-20.16	551691	calcium/calmodulin-dependent protein kinase II
ame-miR-3730-5p	Camkii	169	-25.19	551691	calcium/calmodulin-dependent protein kinase II
ame-miR-3730-5p	Camkii	159	-21.9	551691	calcium/calmodulin-dependent protein kinase II
ame-miR-3730-5p	Camkii	155	-21.5	551691	calcium/calmodulin-dependent protein kinase II
ame-miR-3730-5p	Camkii	153	-25.77	551691	calcium/calmodulin-dependent protein kinase II
ame-miR-3730-5p	Camkii	152	-20.6	551691	calcium/calmodulin-dependent protein kinase II
ame-miR-3730-5p	Camkii	151	-22.61	551691	calcium/calmodulin-dependent protein kinase II
ame-miR-3730-5p	Camkii	147	-20.31	551691	calcium/calmodulin-dependent protein kinase II
ame-miR-3730-5p	Camkii	146	-21.48	551691	calcium/calmodulin-dependent protein kinase II
ame-miR-3730-5p	Camkii	144	-25.84	551691	calcium/calmodulin-dependent protein kinase II
ame-miR-3730-5p	Camkii	143	-20.06	551691	calcium/calmodulin-dependent protein kinase II
ame-miR-3730-5p	Camkii	143	-20.16	551691	calcium/calmodulin-dependent protein kinase II
ame-miR-3730-5p	Camkii	169	-25.19	551691	calcium/calmodulin-dependent protein kinase II
ame-miR-3730-5p	Camkii	159	-21.9	551691	calcium/calmodulin-dependent protein kinase II
ame-miR-3730-5p	Camkii	155	-21.5	551691	calcium/calmodulin-dependent protein kinase II
ame-miR-3730-5p	Camkii	153	-25.77	551691	calcium/calmodulin-dependent protein kinase II
ame-miR-3730-5p	Camkii	152	-20.6	551691	calcium/calmodulin-dependent protein kinase II
ame-miR-3730-5p	Camkii	151	-22.61	551691	calcium/calmodulin-dependent protein kinase II
ame-miR-3730-5p	Camkii	147	-20.31	551691	calcium/calmodulin-dependent protein kinase II
ame-miR-3730-5p	Camkii	146	-21.48	551691	calcium/calmodulin-dependent protein kinase II
ame-miR-3730-5p	Camkii	144	-25.84	551691	calcium/calmodulin-dependent protein kinase II
ame-miR-3730-5p	Camkii	143	-20.06	551691	calcium/calmodulin-dependent protein kinase II
ame-miR-3730-5p	Camkii	143	-20.16	551691	calcium/calmodulin-dependent protein kinase II
ame-miR-3730-5p	Camkii	169	-25.19	551691	calcium/calmodulin-dependent protein kinase II
ame-miR-3730-5p	Camkii	159	-21.9	551691	calcium/calmodulin-dependent protein kinase II
ame-miR-3730-5p	Camkii	155	-21.5	551691	calcium/calmodulin-dependent protein kinase II
ame-miR-3730-5p	Camkii	153	-25.77	551691	calcium/calmodulin-dependent protein kinase II
ame-miR-3730-5p	Camkii	152	-20.6	551691	calcium/calmodulin-dependent protein kinase II
ame-miR-3730-5p	Camkii	151	-22.61	551691	calcium/calmodulin-dependent protein kinase II
ame-miR-3730-5p	Camkii	147	-20.31	551691	calcium/calmodulin-dependent protein kinase II
ame-miR-3730-5p	Camkii	146	-21.48	551691	calcium/calmodulin-dependent protein kinase II
ame-miR-3730-5p	Camkii	144	-25.84	551691	calcium/calmodulin-dependent protein kinase II
ame-miR-3730-5p	Camkii	143	-20.06	551691	calcium/calmodulin-dependent protein kinase II
ame-miR-3730-5p	Camkii	143	-20.16	551691	calcium/calmodulin-dependent protein kinase II
ame-miR-3730-5p	Camkii	169	-25.19	551691	calcium/calmodulin-dependent protein kinase II
ame-miR-3730-5p	Camkii	159	-21.9	551691	calcium/calmodulin-dependent protein kinase II
ame-miR-3730-5p	Camkii	155	-21.5	551691	calcium/calmodulin-dependent protein kinase II
ame-miR-3730-5p	Camkii	153	-25.77	551691	calcium/calmodulin-dependent protein kinase II
ame-miR-3730-5p	Camkii	152	-20.6	551691	calcium/calmodulin-dependent protein kinase II
ame-miR-3730-5p	Camkii	151	-22.61	551691	calcium/calmodulin-dependent protein kinase II
ame-miR-3730-5p	Camkii	147	-20.31	551691	calcium/calmodulin-dependent protein kinase II
ame-miR-3730-5p	Camkii	146	-21.48	551691	calcium/calmodulin-dependent protein kinase II
ame-miR-3730-5p	Camkii	144	-25.84	551691	calcium/calmodulin-dependent protein kinase II
ame-miR-3730-5p	Camkii	143	-20.06	551691	calcium/calmodulin-dependent protein kinase II
ame-miR-3730-5p	Camkii	143	-20.16	551691	calcium/calmodulin-dependent protein kinase II
ame-miR-3730-5p	Camkii	169	-25.19	551691	calcium/calmodulin-dependent protein kinase II
ame-miR-3730-5p	Camkii	159	-21.9	551691	calcium/calmodulin-dependent protein kinase II
ame-miR-3730-5p	Camkii	155	-21.5	551691	calcium/calmodulin-dependent protein kinase II
ame-miR-3730-5p	Camkii	153	-25.77	551691	calcium/calmodulin-dependent protein kinase II
ame-miR-3730-5p	Camkii	152	-20.6	551691	calcium/calmodulin-dependent protein kinase II
ame-miR-3730-5p	Camkii	151	-22.61	551691	calcium/calmodulin-dependent protein kinase II
ame-miR-3730-5p	Camkii	147	-20.31	551691	calcium/calmodulin-dependent protein kinase II
ame-miR-3730-5p	Camkii	146	-21.48	551691	calcium/calmodulin-dependent protein kinase II
ame-miR-3730-5p	Camkii	144	-25.84	551691	calcium/calmodulin-dependent protein kinase II
ame-miR-3730-5p	Camkii	143	-20.06	551691	calcium/calmodulin-dependent protein kinase II
ame-miR-3730-5p	Camkii	143	-20.16	551691	calcium/calmodulin-dependent protein kinase II
ame-miR-3730-5p	Camkii	169	-25.19	551691	calcium/calmodulin-dependent protein kinase II
ame-miR-3730-5p	Camkii	159	-21.9	551691	calcium/calmodulin-dependent protein kinase II
ame-miR-3730-5p	Camkii	155	-21.5	551691	calcium/calmodulin-dependent protein kinase II
ame-miR-3730-5p	Camkii	153	-25.77	551691	calcium/calmodulin-dependent protein kinase II
ame-miR-3730-5p	Camkii	152	-20.6	551691	calcium/calmodulin-dependent protein kinase II
ame-miR-3730-5p	Camkii	151	-22.61	551691	calcium/calmodulin-dependent protein kinase II
ame-miR-3730-5p	Camkii	147	-20.31	551691	calcium/calmodulin-dependent protein kinase II
ame-miR-3730-5p	Camkii	146	-21.48	551691	calcium/calmodulin-dependent protein kinase II
ame-miR-3730-5p	Camkii	144	-25.84	551691	calcium/calmodulin-dependent protein kinase II
ame-miR-3730-5p	Camkii	143	-20.06	551691	calcium/calmodulin-dependent protein kinase II
ame-miR-3730-5p	Camkii	143	-20.16	551691	calcium/calmodulin-dependent protein kinase II
ame-miR-3730-5p	Camkii	169	-25.19	551691	calcium/calmodulin-dependent protein kinase II
ame-miR-3730-5p	Camkii	159	-21.9	551691	calcium/calmodulin-dependent protein kinase II
ame-miR-3730-5p	Camkii	155	-21.5	551691	calcium/calmodulin-dependent protein kinase II
ame-miR-3730-5p	Camkii	153	-25.77	551691	calcium/calmodulin-dependent protein kinase II
ame-miR-3730-5p	Camkii	152	-20.6	551691	calcium/calmodulin-dependent protein kinase II
ame-miR-3730-5p	Camkii	151	-22.61	551691	calcium/calmodulin-dependent protein kinase II
ame-miR-3730-5p	Camkii	147	-20.31	551691	calcium/calmodulin-dependent protein kinase II
ame-miR-3730-5p	Camkii	144	-25.84	551691	calcium/calmodulin-dependent protein kinase II
ame-miR-3730-5p	Camkii	143	-20.06	551691	calcium/calmodulin-dependent protein kinase II
ame-miR-3730-5p	Camkii	143	-20.16	551691	calcium/calmodulin-dependent protein kinase II
ame-miR-3730-5p	Camkii	169	-25.19	551691	calcium/calmodulin-dependent protein kinase II
ame-miR-3730-5p	Camkii	159	-21.9	551691	calcium/calmodulin-dependent protein kinase II
ame-miR-3730-5p	Camkii	155	-21.5	551691	calcium/calmodulin-dependent protein kinase II
ame-miR-3730-5p	Camkii	153	-25.77	551691	calcium/calmodulin-dependent protein kinase II
ame-miR-3730-5p	Camkii	152	-20.6	551691	calcium/calmodulin-dependent protein kinase II
ame-miR-3730-5p	Camkii	151	-22.61	551691	calcium/calmodulin-dependent protein kinase II
ame-miR-3730-5p	Camkii	147	-20.31	551691	calcium/calmodulin-dependent protein kinase II
ame-miR-3730-5p	Camkii	146	-21.48	551691	calcium/calmodulin-dependent protein kinase II
ame-miR-3730-5p	Camkii	144	-25.84	551691	calcium/calmodulin-dependent protein kinase II
ame-miR-3730-5p	Camkii	143	-20.06	551691	calcium/calmodulin-dependent protein kinase II
ame-miR-3730-5p	Camkii	143	-20.16	551691	calcium/calmodulin-dependent protein kinase II
ame-miR-3730-5p	Camkii	169	-25.19	551691	calcium/calmodulin-dependent protein kinase II
ame-miR-3730-5p	Camkii	159	-21.9	551691	calcium/calmodulin-dependent protein kinase II
ame-miR-3730-5p	Camkii	155	-21.5	551691	calcium/calmodulin-dependent protein kinase II
ame-miR-3730-5p	Camkii	153	-25.77	551691	calcium/calmodulin-dependent protein kinase II
ame-miR-3730-5p	Camkii	152	-20.6	551691	calcium/calmodulin-dependent protein kinase II
ame-miR-3730-5p	Camkii	151	-22.61	551691	calcium/calmodulin-dependent protein kinase II
ame-miR-3730-5p	Camkii	147	-20.31	551691	calcium/calmodulin-dependent protein kinase II
ame-miR-3730-5p	Camkii	146	-21.48	551691	calcium/calmodulin-dependent protein kinase II
ame-miR-3730-5p	Camkii	144	-25.84	551691	calcium/calmodulin-dependent protein kinase II
ame-miR-3730-5p	Camkii	143	-20.06	551691	calcium/calmodulin-dependent protein kinase II
ame-miR-3730-5p	Camkii	143	-20.16	551691	calcium/calmodulin-dependent protein kinase II
ame-miR-3730-5p	Camkii	169	-25.19	551691	calcium/calmodulin-dependent protein kinase II
ame-miR-3730-5p	Camkii	159	-21.9	551691	calcium/calmodulin-dependent protein kinase II
ame-miR-3730-5p	Camkii	155	-21.5	551691	calcium/calmodulin-dependent protein kinase II
ame-miR-3730-5p	Camkii	153	-25.77	551691	calcium/calmodulin-dependent protein kinase II
ame-miR-3730-5p	Camkii	152	-20.6	551691	calcium/calmodulin-dependent protein kinase II
ame-miR-3730-5p	Camkii	151	-22.61	551691	calcium/calmodulin-dependent protein kinase II
ame-miR-3730-5p	Camkii	147	-20.31	551691	calcium/calmodulin-dependent protein kinase II
ame-miR-3730-5p	Camkii	146	-21.48	551691	calcium/calmodulin-dependent protein kinase II
ame-miR-3730-5p	Camkii	144	-25.84	551691	calcium/calmodulin-dependent protein kinase II
ame-miR-3730-5p	Camkii	143	-20.06	551691	calcium/calmodulin-dependent protein kinase II
ame-miR-3730-5p	Camkii	143	-20.16	551691	calcium/calmodulin-dependent protein kinase II
ame-miR-3730-5p	Camkii	169	-25.19	551691	calcium/calmodulin-dependent protein kinase II
ame-miR-3730-5p	Camkii	159	-21.9	551691	calcium/calmodulin-dependent protein kinase II
ame-miR-3730-5p	Camkii	155	-21.5	551691	calcium/calmodulin-dependent protein kinase II
ame-miR-3730-5p	Camkii	153	-25.77	551691	calcium/calmodulin-dependent protein kinase II
ame-miR-3730-5p	Camkii	152	-20.6	551691	calcium/calmodulin-dependent protein kinase II
ame-miR-3730-5p	Camkii	151	-22.61	551691	calcium/calmodulin-dependent protein kinase II
ame-miR-3730-5p	Camkii	147	-20.31	551691	calcium/calmodulin-dependent protein kinase II
ame-miR-3730-5p	Camkii	146	-21.48	551691	calcium/calmodulin-dependent protein kinase II
ame-miR-3730-5p	Camkii	144	-25.84	551691	calcium/calmodulin-dependent protein kinase II
ame-miR-3730-5p	Camkii	143	-20.06	551691	calcium/calmodulin-dependent protein kinase II
ame-miR-3730-5p	Camkii	143	-20.16	551691	calcium/calmodulin-dependent protein kinase II
ame-miR-3730-5p	LOC552340	163	-21.99	552340	glypican-4
ame-miR-3730-5p	LOC552340	161	-26.08	552340	glypican-4
ame-miR-3730-5p	LOC552340	159	-22.3	552340	glypican-4
ame-miR-3730-5p	LOC552340	151	-23.36	552340	glypican-4
ame-miR-3730-5p	LOC552340	147	-22.57	552340	glypican-4
ame-miR-3730-5p	LOC552340	147	-25.11	552340	glypican-4
ame-miR-3730-5p	LOC552340	145	-23.86	552340	glypican-4
ame-miR-3730-5p	LOC552340	143	-22.74	552340	glypican-4
ame-miR-3730-5p	LOC552340	141	-21.56	552340	glypican-4
ame-miR-3730-5p	LOC552340	163	-21.99	552340	glypican-4
ame-miR-3730-5p	LOC552340	161	-26.08	552340	glypican-4
ame-miR-3730-5p	LOC552340	159	-22.3	552340	glypican-4
ame-miR-3730-5p	LOC552340	151	-23.36	552340	glypican-4
ame-miR-3730-5p	LOC552340	147	-22.57	552340	glypican-4
ame-miR-3730-5p	LOC552340	147	-25.11	552340	glypican-4
ame-miR-3730-5p	LOC552340	145	-23.86	552340	glypican-4
ame-miR-3730-5p	LOC552340	143	-22.74	552340	glypican-4
ame-miR-3730-5p	LOC552340	141	-21.56	552340	glypican-4
ame-miR-3730-5p	LOC552374	162	-24.91	552374	protein Wnt-1
ame-miR-3730-5p	LOC552374	165	-22.97	552374	protein Wnt-1
ame-miR-3730-5p	LOC552374	162	-24.91	552374	protein Wnt-1
ame-miR-3730-5p	LOC552374	165	-22.97	552374	protein Wnt-1
ame-miR-3730-5p	LOC552374	162	-24.91	552374	protein Wnt-1
ame-miR-3730-5p	LOC552374	147	-23.51	552374	protein Wnt-1
ame-miR-3730-5p	LOC552374	147	-20.34	552374	protein Wnt-1
ame-miR-3730-5p	LOC552374	144	-21.3	552374	protein Wnt-1
ame-miR-3730-5p	LOC552374	141	-20.83	552374	protein Wnt-1
ame-miR-3730-5p	LOC552374	165	-22.97	552374	protein Wnt-1
ame-miR-3730-5p	LOC552374	162	-24.91	552374	protein Wnt-1
ame-miR-3730-5p	LOC552545	169	-30.1	552545	division abnormally delayed protein
ame-miR-3730-5p	LOC552545	163	-25.74	552545	division abnormally delayed protein
ame-miR-3730-5p	LOC552545	158	-23.98	552545	division abnormally delayed protein
ame-miR-3730-5p	LOC552545	154	-22.34	552545	division abnormally delayed protein
ame-miR-3730-5p	LOC552545	154	-21.38	552545	division abnormally delayed protein
ame-miR-3730-5p	LOC552545	152	-20.97	552545	division abnormally delayed protein
ame-miR-3730-5p	LOC552545	151	-20.41	552545	division abnormally delayed protein
ame-miR-3730-5p	LOC552545	147	-21.04	552545	division abnormally delayed protein
ame-miR-3730-5p	LOC552545	141	-23.65	552545	division abnormally delayed protein
ame-miR-3730-5p	LOC552545	141	-24.55	552545	division abnormally delayed protein
ame-miR-3730-5p	LOC552545	140	-23.9	552545	division abnormally delayed protein
ame-miR-3730-5p	LOC552545	140	-23.74	552545	division abnormally delayed protein
ame-miR-3730-5p	LOC552545	140	-24.33	552545	division abnormally delayed protein
ame-miR-3730-5p	LOC552545	169	-30.1	552545	division abnormally delayed protein
ame-miR-3730-5p	LOC552545	158	-23.98	552545	division abnormally delayed protein
ame-miR-3730-5p	LOC552545	154	-22.34	552545	division abnormally delayed protein
ame-miR-3730-5p	LOC552545	154	-21.38	552545	division abnormally delayed protein
ame-miR-3730-5p	LOC552545	152	-20.97	552545	division abnormally delayed protein
ame-miR-3730-5p	LOC552545	151	-20.41	552545	division abnormally delayed protein
ame-miR-3730-5p	LOC552545	141	-23.65	552545	division abnormally delayed protein
ame-miR-3730-5p	LOC552545	141	-24.55	552545	division abnormally delayed protein
ame-miR-3730-5p	LOC552545	140	-23.9	552545	division abnormally delayed protein
ame-miR-3730-5p	LOC552545	140	-23.74	552545	division abnormally delayed protein
ame-miR-3730-5p	LOC724378	167	-23.32	724378	BMP and activin membrane-bound inhibitor homolog
ame-miR-3730-5p	LOC724378	156	-22.98	724378	BMP and activin membrane-bound inhibitor homolog
ame-miR-3730-5p	LOC724997	168	-22.55	724997	protein naked cuticle homolog 2-like
ame-miR-3730-5p	LOC724997	162	-26.36	724997	protein naked cuticle homolog 2-like
ame-miR-3730-5p	LOC725511	158	-28.38	725511	protein Wnt-11b
ame-miR-3730-5p	LOC726289	144	-22.15	726289	transcription factor AP-1
ame-miR-3730-5p	LOC726671	167	-24.21	726671	uncharacterized LOC726671
ame-miR-3730-5p	LOC726671	158	-28.07	726671	uncharacterized LOC726671
ame-miR-3730-5p	LOC726671	152	-24.5	726671	uncharacterized LOC726671
ame-miR-3730-5p	LOC726671	151	-21.75	726671	uncharacterized LOC726671
ame-miR-3730-5p	LOC726671	146	-20.17	726671	uncharacterized LOC726671
ame-miR-3730-5p	LOC726671	167	-24.21	726671	uncharacterized LOC726671
ame-miR-3730-5p	LOC726671	158	-28.07	726671	uncharacterized LOC726671
ame-miR-3730-5p	LOC726671	152	-24.5	726671	uncharacterized LOC726671
ame-miR-3730-5p	LOC726671	151	-21.75	726671	uncharacterized LOC726671
ame-miR-3730-5p	LOC726671	146	-20.17	726671	uncharacterized LOC726671
ame-miR-3730-5p	LOC726671	167	-24.21	726671	uncharacterized LOC726671
ame-miR-3730-5p	LOC726671	158	-28.07	726671	uncharacterized LOC726671
ame-miR-3730-5p	LOC726671	152	-24.5	726671	uncharacterized LOC726671
ame-miR-3730-5p	LOC726671	151	-21.75	726671	uncharacterized LOC726671
ame-miR-3730-5p	LOC726671	146	-20.17	726671	uncharacterized LOC726671
ame-miR-3730-5p	LOC726671	167	-24.21	726671	uncharacterized LOC726671
ame-miR-3730-5p	LOC726671	158	-28.07	726671	uncharacterized LOC726671
ame-miR-3730-5p	LOC726671	152	-24.5	726671	uncharacterized LOC726671
ame-miR-3730-5p	LOC726671	151	-21.75	726671	uncharacterized LOC726671
ame-miR-3730-5p	LOC726671	146	-20.17	726671	uncharacterized LOC726671
ame-miR-3730-5p	LOC100576247	161	-24.9	100576247	frizzled 2
ame-miR-3730-5p	LOC100576247	156	-21.78	100576247	frizzled 2
ame-miR-3730-5p	LOC100576247	151	-22.18	100576247	frizzled 2
ame-miR-3730-5p	LOC100576247	147	-23.09	100576247	frizzled 2
ame-miR-3730-5p	LOC100576247	147	-22.53	100576247	frizzled 2
ame-miR-3730-5p	LOC100576247	144	-21.74	100576247	frizzled 2
ame-miR-3730-5p	LOC100576247	165	-27.65	100576247	frizzled 2
ame-miR-3730-5p	LOC100576247	161	-24.9	100576247	frizzled 2
ame-miR-3730-5p	LOC100576247	160	-24.93	100576247	frizzled 2
ame-miR-3730-5p	LOC100576247	156	-21.78	100576247	frizzled 2
ame-miR-3730-5p	LOC100576247	151	-21.35	100576247	frizzled 2
ame-miR-3730-5p	LOC100576247	151	-22.18	100576247	frizzled 2
ame-miR-3730-5p	LOC100576247	150	-21.49	100576247	frizzled 2
ame-miR-3730-5p	LOC100576247	147	-20.07	100576247	frizzled 2
ame-miR-3730-5p	LOC100576247	147	-23.09	100576247	frizzled 2
ame-miR-3730-5p	LOC100576247	147	-22.53	100576247	frizzled 2
ame-miR-3730-5p	LOC100576247	145	-20.24	100576247	frizzled 2
ame-miR-3730-5p	LOC100576247	145	-21.23	100576247	frizzled 2
ame-miR-3730-5p	LOC100576247	145	-21.54	100576247	frizzled 2
ame-miR-3730-5p	LOC100576247	144	-20.51	100576247	frizzled 2
ame-miR-3730-5p	LOC100576247	144	-21.74	100576247	frizzled 2
ame-miR-3730-5p	LOC100576247	140	-23.37	100576247	frizzled 2
ame-miR-3730-5p	LOC100576247	165	-27.65	100576247	frizzled 2
ame-miR-3730-5p	LOC100576247	161	-24.9	100576247	frizzled 2
ame-miR-3730-5p	LOC100576247	156	-21.78	100576247	frizzled 2
ame-miR-3730-5p	LOC100576247	151	-21.35	100576247	frizzled 2
ame-miR-3730-5p	LOC100576247	151	-22.18	100576247	frizzled 2
ame-miR-3730-5p	LOC100576247	150	-21.49	100576247	frizzled 2
ame-miR-3730-5p	LOC100576247	147	-20.07	100576247	frizzled 2
ame-miR-3730-5p	LOC100576247	147	-23.09	100576247	frizzled 2
ame-miR-3730-5p	LOC100576247	147	-22.53	100576247	frizzled 2
ame-miR-3730-5p	LOC100576247	145	-21.54	100576247	frizzled 2
ame-miR-3730-5p	LOC100576247	144	-21.74	100576247	frizzled 2
ame-miR-3730-5p	LOC100576247	161	-24.9	100576247	frizzled 2
ame-miR-3730-5p	LOC100576247	156	-21.78	100576247	frizzled 2
ame-miR-3730-5p	LOC100576247	151	-22.18	100576247	frizzled 2
ame-miR-3730-5p	LOC100576247	147	-23.09	100576247	frizzled 2
ame-miR-3730-5p	LOC100576247	147	-22.53	100576247	frizzled 2
ame-miR-3730-5p	LOC100576247	144	-21.74	100576247	frizzled 2
ame-miR-3730-5p	LOC100576247	147	-22.53	100576247	frizzled 2
ame-miR-3730-5p	LOC100576247	144	-21.74	100576247	frizzled 2
ame-miR-3730-5p	LOC100576392	159	-23.33	100576392	transcriptional regulator Myc-B
ame-miR-3730-5p	LOC100576392	152	-23.3	100576392	transcriptional regulator Myc-B
ame-miR-3730-5p	LOC100576392	151	-24.44	100576392	transcriptional regulator Myc-B
ame-miR-3730-5p	LOC100576392	147	-29.27	100576392	transcriptional regulator Myc-B
ame-miR-3730-5p	LOC100576392	143	-21.58	100576392	transcriptional regulator Myc-B
ame-miR-3730-5p	LOC100576392	151	-24.44	100576392	transcriptional regulator Myc-B
ame-miR-3730-5p	LOC100576392	147	-29.27	100576392	transcriptional regulator Myc-B
ame-miR-3730-5p	LOC100576392	143	-21.58	100576392	transcriptional regulator Myc-B
ame-miR-3730-5p	LOC100576392	159	-23.33	100576392	transcriptional regulator Myc-B
ame-miR-3730-5p	LOC100576392	152	-23.3	100576392	transcriptional regulator Myc-B
ame-miR-3730-5p	LOC100576392	151	-24.44	100576392	transcriptional regulator Myc-B
ame-miR-3730-5p	LOC100576392	147	-29.27	100576392	transcriptional regulator Myc-B
ame-miR-3730-5p	LOC100576392	143	-21.58	100576392	transcriptional regulator Myc-B
ame-miR-3730-5p	LOC107963993	166	-20.34	107963993	palmitoleoyl-protein carboxylesterase NOTUM
ame-miR-3730-5p	LOC107963993	158	-23.21	107963993	palmitoleoyl-protein carboxylesterase NOTUM
ame-miR-3730-5p	LOC107963993	151	-22.65	107963993	palmitoleoyl-protein carboxylesterase NOTUM
ame-miR-3730-5p	LOC408292	158	-23.31	408292	transcriptional coactivator YAP1
ame-miR-3730-5p	LOC408292	158	-23.31	408292	transcriptional coactivator YAP1
ame-miR-3730-5p	LOC408616	163	-24.75	408616	transcriptional enhancer factor TEF-1
ame-miR-3730-5p	LOC408616	160	-24.54	408616	transcriptional enhancer factor TEF-1
ame-miR-3730-5p	LOC408616	159	-27.41	408616	transcriptional enhancer factor TEF-1
ame-miR-3730-5p	LOC408616	157	-24.54	408616	transcriptional enhancer factor TEF-1
ame-miR-3730-5p	LOC408616	153	-20.11	408616	transcriptional enhancer factor TEF-1
ame-miR-3730-5p	LOC408616	152	-20.74	408616	transcriptional enhancer factor TEF-1
ame-miR-3730-5p	LOC408616	151	-20.61	408616	transcriptional enhancer factor TEF-1
ame-miR-3730-5p	LOC408616	148	-22.72	408616	transcriptional enhancer factor TEF-1
ame-miR-3730-5p	LOC408616	148	-24.05	408616	transcriptional enhancer factor TEF-1
ame-miR-3730-5p	LOC408616	147	-22.64	408616	transcriptional enhancer factor TEF-1
ame-miR-3730-5p	LOC408616	145	-20.02	408616	transcriptional enhancer factor TEF-1
ame-miR-3730-5p	LOC408616	144	-20.04	408616	transcriptional enhancer factor TEF-1
ame-miR-3730-5p	LOC408616	143	-22.74	408616	transcriptional enhancer factor TEF-1
ame-miR-3730-5p	LOC408616	142	-21.81	408616	transcriptional enhancer factor TEF-1
ame-miR-3730-5p	LOC408616	142	-21.27	408616	transcriptional enhancer factor TEF-1
ame-miR-3730-5p	LOC408616	140	-22.28	408616	transcriptional enhancer factor TEF-1
ame-miR-3730-5p	LOC408616	163	-24.75	408616	transcriptional enhancer factor TEF-1
ame-miR-3730-5p	LOC408616	159	-27.41	408616	transcriptional enhancer factor TEF-1
ame-miR-3730-5p	LOC408616	153	-20.11	408616	transcriptional enhancer factor TEF-1
ame-miR-3730-5p	LOC408616	148	-22.72	408616	transcriptional enhancer factor TEF-1
ame-miR-3730-5p	LOC408616	148	-24.05	408616	transcriptional enhancer factor TEF-1
ame-miR-3730-5p	LOC408616	147	-22.64	408616	transcriptional enhancer factor TEF-1
ame-miR-3730-5p	LOC408616	145	-20.02	408616	transcriptional enhancer factor TEF-1
ame-miR-3730-5p	LOC408616	144	-20.04	408616	transcriptional enhancer factor TEF-1
ame-miR-3730-5p	LOC408616	143	-22.74	408616	transcriptional enhancer factor TEF-1
ame-miR-3730-5p	LOC408616	142	-21.27	408616	transcriptional enhancer factor TEF-1
ame-miR-3730-5p	LOC408616	163	-24.75	408616	transcriptional enhancer factor TEF-1
ame-miR-3730-5p	LOC408616	160	-24.54	408616	transcriptional enhancer factor TEF-1
ame-miR-3730-5p	LOC408616	159	-27.41	408616	transcriptional enhancer factor TEF-1
ame-miR-3730-5p	LOC408616	153	-20.11	408616	transcriptional enhancer factor TEF-1
ame-miR-3730-5p	LOC408616	152	-20.74	408616	transcriptional enhancer factor TEF-1
ame-miR-3730-5p	LOC408616	148	-22.72	408616	transcriptional enhancer factor TEF-1
ame-miR-3730-5p	LOC408616	148	-24.05	408616	transcriptional enhancer factor TEF-1
ame-miR-3730-5p	LOC408616	147	-22.64	408616	transcriptional enhancer factor TEF-1
ame-miR-3730-5p	LOC408616	145	-20.02	408616	transcriptional enhancer factor TEF-1
ame-miR-3730-5p	LOC408616	144	-20.04	408616	transcriptional enhancer factor TEF-1
ame-miR-3730-5p	LOC408616	143	-22.74	408616	transcriptional enhancer factor TEF-1
ame-miR-3730-5p	LOC408616	142	-21.81	408616	transcriptional enhancer factor TEF-1
ame-miR-3730-5p	LOC408616	142	-21.27	408616	transcriptional enhancer factor TEF-1
ame-miR-3730-5p	LOC408616	140	-22.28	408616	transcriptional enhancer factor TEF-1
ame-miR-3730-5p	LOC408616	163	-24.75	408616	transcriptional enhancer factor TEF-1
ame-miR-3730-5p	LOC408616	160	-24.54	408616	transcriptional enhancer factor TEF-1
ame-miR-3730-5p	LOC408616	159	-27.41	408616	transcriptional enhancer factor TEF-1
ame-miR-3730-5p	LOC408616	153	-20.11	408616	transcriptional enhancer factor TEF-1
ame-miR-3730-5p	LOC408616	152	-20.74	408616	transcriptional enhancer factor TEF-1
ame-miR-3730-5p	LOC408616	148	-22.72	408616	transcriptional enhancer factor TEF-1
ame-miR-3730-5p	LOC408616	148	-24.05	408616	transcriptional enhancer factor TEF-1
ame-miR-3730-5p	LOC408616	147	-22.64	408616	transcriptional enhancer factor TEF-1
ame-miR-3730-5p	LOC408616	145	-20.02	408616	transcriptional enhancer factor TEF-1
ame-miR-3730-5p	LOC408616	144	-20.04	408616	transcriptional enhancer factor TEF-1
ame-miR-3730-5p	LOC408616	143	-22.74	408616	transcriptional enhancer factor TEF-1
ame-miR-3730-5p	LOC408616	142	-21.81	408616	transcriptional enhancer factor TEF-1
ame-miR-3730-5p	LOC408616	142	-21.27	408616	transcriptional enhancer factor TEF-1
ame-miR-3730-5p	LOC408616	147	-22.64	408616	transcriptional enhancer factor TEF-1
ame-miR-3730-5p	LOC408616	144	-20.04	408616	transcriptional enhancer factor TEF-1
ame-miR-3730-5p	LOC408616	163	-24.75	408616	transcriptional enhancer factor TEF-1
ame-miR-3730-5p	LOC408616	159	-27.41	408616	transcriptional enhancer factor TEF-1
ame-miR-3730-5p	LOC408616	153	-20.11	408616	transcriptional enhancer factor TEF-1
ame-miR-3730-5p	LOC408616	148	-22.72	408616	transcriptional enhancer factor TEF-1
ame-miR-3730-5p	LOC408616	148	-24.05	408616	transcriptional enhancer factor TEF-1
ame-miR-3730-5p	LOC408616	147	-22.64	408616	transcriptional enhancer factor TEF-1
ame-miR-3730-5p	LOC408616	145	-20.02	408616	transcriptional enhancer factor TEF-1
ame-miR-3730-5p	LOC408616	144	-20.04	408616	transcriptional enhancer factor TEF-1
ame-miR-3730-5p	LOC408616	143	-22.74	408616	transcriptional enhancer factor TEF-1
ame-miR-3730-5p	LOC408616	142	-21.27	408616	transcriptional enhancer factor TEF-1
ame-miR-3730-5p	LOC408616	163	-24.75	408616	transcriptional enhancer factor TEF-1
ame-miR-3730-5p	LOC408616	160	-24.54	408616	transcriptional enhancer factor TEF-1
ame-miR-3730-5p	LOC408616	159	-27.41	408616	transcriptional enhancer factor TEF-1
ame-miR-3730-5p	LOC408616	157	-24.54	408616	transcriptional enhancer factor TEF-1
ame-miR-3730-5p	LOC408616	153	-20.11	408616	transcriptional enhancer factor TEF-1
ame-miR-3730-5p	LOC408616	152	-20.74	408616	transcriptional enhancer factor TEF-1
ame-miR-3730-5p	LOC408616	151	-20.61	408616	transcriptional enhancer factor TEF-1
ame-miR-3730-5p	LOC408616	148	-22.72	408616	transcriptional enhancer factor TEF-1
ame-miR-3730-5p	LOC408616	148	-24.05	408616	transcriptional enhancer factor TEF-1
ame-miR-3730-5p	LOC408616	147	-22.64	408616	transcriptional enhancer factor TEF-1
ame-miR-3730-5p	LOC408616	145	-20.02	408616	transcriptional enhancer factor TEF-1
ame-miR-3730-5p	LOC408616	144	-20.04	408616	transcriptional enhancer factor TEF-1
ame-miR-3730-5p	LOC408616	143	-22.74	408616	transcriptional enhancer factor TEF-1
ame-miR-3730-5p	LOC408616	142	-21.81	408616	transcriptional enhancer factor TEF-1
ame-miR-3730-5p	LOC408616	142	-21.27	408616	transcriptional enhancer factor TEF-1
ame-miR-3730-5p	LOC408616	140	-22.28	408616	transcriptional enhancer factor TEF-1
ame-miR-3730-5p	LOC408616	163	-24.75	408616	transcriptional enhancer factor TEF-1
ame-miR-3730-5p	LOC408616	160	-24.54	408616	transcriptional enhancer factor TEF-1
ame-miR-3730-5p	LOC408616	159	-27.41	408616	transcriptional enhancer factor TEF-1
ame-miR-3730-5p	LOC408616	153	-20.11	408616	transcriptional enhancer factor TEF-1
ame-miR-3730-5p	LOC408616	152	-20.74	408616	transcriptional enhancer factor TEF-1
ame-miR-3730-5p	LOC408616	148	-22.72	408616	transcriptional enhancer factor TEF-1
ame-miR-3730-5p	LOC408616	148	-24.05	408616	transcriptional enhancer factor TEF-1
ame-miR-3730-5p	LOC408616	147	-22.64	408616	transcriptional enhancer factor TEF-1
ame-miR-3730-5p	LOC408616	145	-20.02	408616	transcriptional enhancer factor TEF-1
ame-miR-3730-5p	LOC408616	144	-20.04	408616	transcriptional enhancer factor TEF-1
ame-miR-3730-5p	LOC408616	143	-22.74	408616	transcriptional enhancer factor TEF-1
ame-miR-3730-5p	LOC408616	142	-21.81	408616	transcriptional enhancer factor TEF-1
ame-miR-3730-5p	LOC408616	142	-21.27	408616	transcriptional enhancer factor TEF-1
ame-miR-3730-5p	LOC408616	140	-22.28	408616	transcriptional enhancer factor TEF-1
ame-miR-3730-5p	LOC408616	163	-24.75	408616	transcriptional enhancer factor TEF-1
ame-miR-3730-5p	LOC408616	159	-27.41	408616	transcriptional enhancer factor TEF-1
ame-miR-3730-5p	LOC408616	153	-20.11	408616	transcriptional enhancer factor TEF-1
ame-miR-3730-5p	LOC408616	148	-22.72	408616	transcriptional enhancer factor TEF-1
ame-miR-3730-5p	LOC408616	148	-24.05	408616	transcriptional enhancer factor TEF-1
ame-miR-3730-5p	LOC408616	147	-22.64	408616	transcriptional enhancer factor TEF-1
ame-miR-3730-5p	LOC408616	145	-20.02	408616	transcriptional enhancer factor TEF-1
ame-miR-3730-5p	LOC408616	144	-20.04	408616	transcriptional enhancer factor TEF-1
ame-miR-3730-5p	LOC408616	143	-22.74	408616	transcriptional enhancer factor TEF-1
ame-miR-3730-5p	LOC408616	142	-21.27	408616	transcriptional enhancer factor TEF-1
ame-miR-3730-5p	LOC408616	163	-24.75	408616	transcriptional enhancer factor TEF-1
ame-miR-3730-5p	LOC408616	160	-24.54	408616	transcriptional enhancer factor TEF-1
ame-miR-3730-5p	LOC408616	159	-27.41	408616	transcriptional enhancer factor TEF-1
ame-miR-3730-5p	LOC408616	157	-24.54	408616	transcriptional enhancer factor TEF-1
ame-miR-3730-5p	LOC408616	153	-20.11	408616	transcriptional enhancer factor TEF-1
ame-miR-3730-5p	LOC408616	152	-20.74	408616	transcriptional enhancer factor TEF-1
ame-miR-3730-5p	LOC408616	151	-20.61	408616	transcriptional enhancer factor TEF-1
ame-miR-3730-5p	LOC408616	148	-22.72	408616	transcriptional enhancer factor TEF-1
ame-miR-3730-5p	LOC408616	148	-24.05	408616	transcriptional enhancer factor TEF-1
ame-miR-3730-5p	LOC408616	147	-22.64	408616	transcriptional enhancer factor TEF-1
ame-miR-3730-5p	LOC408616	145	-20.02	408616	transcriptional enhancer factor TEF-1
ame-miR-3730-5p	LOC408616	144	-20.04	408616	transcriptional enhancer factor TEF-1
ame-miR-3730-5p	LOC408616	143	-22.74	408616	transcriptional enhancer factor TEF-1
ame-miR-3730-5p	LOC408616	142	-21.81	408616	transcriptional enhancer factor TEF-1
ame-miR-3730-5p	LOC408616	142	-21.27	408616	transcriptional enhancer factor TEF-1
ame-miR-3730-5p	LOC408616	140	-22.28	408616	transcriptional enhancer factor TEF-1
ame-miR-3730-5p	LOC408616	163	-24.75	408616	transcriptional enhancer factor TEF-1
ame-miR-3730-5p	LOC408616	160	-24.54	408616	transcriptional enhancer factor TEF-1
ame-miR-3730-5p	LOC408616	159	-27.41	408616	transcriptional enhancer factor TEF-1
ame-miR-3730-5p	LOC408616	157	-24.54	408616	transcriptional enhancer factor TEF-1
ame-miR-3730-5p	LOC408616	153	-20.11	408616	transcriptional enhancer factor TEF-1
ame-miR-3730-5p	LOC408616	152	-20.74	408616	transcriptional enhancer factor TEF-1
ame-miR-3730-5p	LOC408616	151	-20.61	408616	transcriptional enhancer factor TEF-1
ame-miR-3730-5p	LOC408616	148	-22.72	408616	transcriptional enhancer factor TEF-1
ame-miR-3730-5p	LOC408616	148	-24.05	408616	transcriptional enhancer factor TEF-1
ame-miR-3730-5p	LOC408616	147	-22.64	408616	transcriptional enhancer factor TEF-1
ame-miR-3730-5p	LOC408616	145	-20.02	408616	transcriptional enhancer factor TEF-1
ame-miR-3730-5p	LOC408616	144	-20.04	408616	transcriptional enhancer factor TEF-1
ame-miR-3730-5p	LOC408616	143	-22.74	408616	transcriptional enhancer factor TEF-1
ame-miR-3730-5p	LOC408616	142	-21.81	408616	transcriptional enhancer factor TEF-1
ame-miR-3730-5p	LOC408616	142	-21.27	408616	transcriptional enhancer factor TEF-1
ame-miR-3730-5p	LOC408616	140	-22.28	408616	transcriptional enhancer factor TEF-1
ame-miR-3730-5p	LOC408616	147	-22.64	408616	transcriptional enhancer factor TEF-1
ame-miR-3730-5p	LOC408616	144	-20.04	408616	transcriptional enhancer factor TEF-1
ame-miR-3730-5p	LOC408616	163	-24.75	408616	transcriptional enhancer factor TEF-1
ame-miR-3730-5p	LOC408616	160	-24.54	408616	transcriptional enhancer factor TEF-1
ame-miR-3730-5p	LOC408616	159	-27.41	408616	transcriptional enhancer factor TEF-1
ame-miR-3730-5p	LOC408616	153	-20.11	408616	transcriptional enhancer factor TEF-1
ame-miR-3730-5p	LOC408616	152	-20.74	408616	transcriptional enhancer factor TEF-1
ame-miR-3730-5p	LOC408616	148	-22.72	408616	transcriptional enhancer factor TEF-1
ame-miR-3730-5p	LOC408616	148	-24.05	408616	transcriptional enhancer factor TEF-1
ame-miR-3730-5p	LOC408616	147	-22.64	408616	transcriptional enhancer factor TEF-1
ame-miR-3730-5p	LOC408616	145	-20.02	408616	transcriptional enhancer factor TEF-1
ame-miR-3730-5p	LOC408616	144	-20.04	408616	transcriptional enhancer factor TEF-1
ame-miR-3730-5p	LOC408616	143	-22.74	408616	transcriptional enhancer factor TEF-1
ame-miR-3730-5p	LOC408616	142	-21.81	408616	transcriptional enhancer factor TEF-1
ame-miR-3730-5p	LOC408616	142	-21.27	408616	transcriptional enhancer factor TEF-1
ame-miR-3730-5p	LOC408767	166	-24.89	408767	protein dachsous
ame-miR-3730-5p	LOC408767	159	-27.3	408767	protein dachsous
ame-miR-3730-5p	LOC408767	157	-22.03	408767	protein dachsous
ame-miR-3730-5p	LOC408767	151	-23.2	408767	protein dachsous
ame-miR-3730-5p	LOC408767	148	-23.97	408767	protein dachsous
ame-miR-3730-5p	LOC408767	142	-23.46	408767	protein dachsous
ame-miR-3730-5p	LOC408767	141	-23.88	408767	protein dachsous
ame-miR-3730-5p	LOC408767	141	-22.38	408767	protein dachsous
ame-miR-3730-5p	LOC408767	140	-21.28	408767	protein dachsous
ame-miR-3730-5p	LOC408767	166	-24.89	408767	protein dachsous
ame-miR-3730-5p	LOC408767	159	-27.3	408767	protein dachsous
ame-miR-3730-5p	LOC408767	157	-22.03	408767	protein dachsous
ame-miR-3730-5p	LOC408767	151	-23.2	408767	protein dachsous
ame-miR-3730-5p	LOC408767	148	-23.97	408767	protein dachsous
ame-miR-3730-5p	LOC408767	142	-23.46	408767	protein dachsous
ame-miR-3730-5p	LOC408767	141	-23.88	408767	protein dachsous
ame-miR-3730-5p	LOC408767	141	-22.38	408767	protein dachsous
ame-miR-3730-5p	LOC408767	140	-21.28	408767	protein dachsous
ame-miR-3730-5p	LOC408767	166	-24.89	408767	protein dachsous
ame-miR-3730-5p	LOC408767	159	-27.3	408767	protein dachsous
ame-miR-3730-5p	LOC408767	157	-22.03	408767	protein dachsous
ame-miR-3730-5p	LOC408767	151	-23.2	408767	protein dachsous
ame-miR-3730-5p	LOC408767	148	-23.97	408767	protein dachsous
ame-miR-3730-5p	LOC408767	142	-23.46	408767	protein dachsous
ame-miR-3730-5p	LOC408767	141	-23.88	408767	protein dachsous
ame-miR-3730-5p	LOC408767	141	-22.38	408767	protein dachsous
ame-miR-3730-5p	LOC408767	140	-21.28	408767	protein dachsous
ame-miR-3730-5p	LOC408767	170	-29.91	408767	protein dachsous
ame-miR-3730-5p	LOC408767	169	-26.65	408767	protein dachsous
ame-miR-3730-5p	LOC408767	166	-24.89	408767	protein dachsous
ame-miR-3730-5p	LOC408767	161	-29.77	408767	protein dachsous
ame-miR-3730-5p	LOC408767	161	-22.06	408767	protein dachsous
ame-miR-3730-5p	LOC408767	161	-23.65	408767	protein dachsous
ame-miR-3730-5p	LOC408767	160	-22.38	408767	protein dachsous
ame-miR-3730-5p	LOC408767	159	-21.52	408767	protein dachsous
ame-miR-3730-5p	LOC408767	159	-27.3	408767	protein dachsous
ame-miR-3730-5p	LOC408767	157	-22.03	408767	protein dachsous
ame-miR-3730-5p	LOC408767	155	-25.54	408767	protein dachsous
ame-miR-3730-5p	LOC408767	155	-27.75	408767	protein dachsous
ame-miR-3730-5p	LOC408767	153	-30.91	408767	protein dachsous
ame-miR-3730-5p	LOC408767	152	-22.7	408767	protein dachsous
ame-miR-3730-5p	LOC408767	152	-26.05	408767	protein dachsous
ame-miR-3730-5p	LOC408767	151	-23.2	408767	protein dachsous
ame-miR-3730-5p	LOC408767	150	-20.91	408767	protein dachsous
ame-miR-3730-5p	LOC408767	149	-22.08	408767	protein dachsous
ame-miR-3730-5p	LOC408767	148	-21.48	408767	protein dachsous
ame-miR-3730-5p	LOC408767	148	-26.06	408767	protein dachsous
ame-miR-3730-5p	LOC408767	148	-23.17	408767	protein dachsous
ame-miR-3730-5p	LOC408767	148	-23.97	408767	protein dachsous
ame-miR-3730-5p	LOC408767	147	-20.15	408767	protein dachsous
ame-miR-3730-5p	LOC408767	144	-27.37	408767	protein dachsous
ame-miR-3730-5p	LOC408767	144	-23.24	408767	protein dachsous
ame-miR-3730-5p	LOC408767	144	-21.92	408767	protein dachsous
ame-miR-3730-5p	LOC408767	144	-23.85	408767	protein dachsous
ame-miR-3730-5p	LOC408767	143	-23.75	408767	protein dachsous
ame-miR-3730-5p	LOC408767	143	-22.61	408767	protein dachsous
ame-miR-3730-5p	LOC408767	142	-22.71	408767	protein dachsous
ame-miR-3730-5p	LOC408767	142	-20.99	408767	protein dachsous
ame-miR-3730-5p	LOC408767	142	-23.46	408767	protein dachsous
ame-miR-3730-5p	LOC408767	141	-23.88	408767	protein dachsous
ame-miR-3730-5p	LOC408767	141	-22.38	408767	protein dachsous
ame-miR-3730-5p	LOC408767	140	-21.45	408767	protein dachsous
ame-miR-3730-5p	LOC408767	140	-21.28	408767	protein dachsous
ame-miR-3730-5p	LOC408767	159	-27.3	408767	protein dachsous
ame-miR-3730-5p	LOC408767	157	-22.03	408767	protein dachsous
ame-miR-3730-5p	LOC408767	151	-23.2	408767	protein dachsous
ame-miR-3730-5p	LOC408767	142	-23.46	408767	protein dachsous
ame-miR-3730-5p	LOC408767	141	-23.88	408767	protein dachsous
ame-miR-3730-5p	LOC408767	141	-22.38	408767	protein dachsous
ame-miR-3730-5p	LOC408767	140	-21.28	408767	protein dachsous
ame-miR-3730-5p	LOC409348	143	-22.46	409348	lethal(2) giant larvae protein homolog 1
ame-miR-3730-5p	LOC409348	141	-23.15	409348	lethal(2) giant larvae protein homolog 1
ame-miR-3730-5p	LOC409348	143	-22.46	409348	lethal(2) giant larvae protein homolog 1
ame-miR-3730-5p	LOC409348	141	-23.15	409348	lethal(2) giant larvae protein homolog 1
ame-miR-3730-5p	LOC409348	143	-22.46	409348	lethal(2) giant larvae protein homolog 1
ame-miR-3730-5p	LOC409348	141	-23.15	409348	lethal(2) giant larvae protein homolog 1
ame-miR-3730-5p	LOC409348	143	-22.46	409348	lethal(2) giant larvae protein homolog 1
ame-miR-3730-5p	LOC409348	141	-23.15	409348	lethal(2) giant larvae protein homolog 1
ame-miR-3730-5p	LOC409348	143	-22.46	409348	lethal(2) giant larvae protein homolog 1
ame-miR-3730-5p	LOC409348	141	-23.15	409348	lethal(2) giant larvae protein homolog 1
ame-miR-3730-5p	LOC409348	143	-22.46	409348	lethal(2) giant larvae protein homolog 1
ame-miR-3730-5p	LOC409348	141	-23.15	409348	lethal(2) giant larvae protein homolog 1
ame-miR-3730-5p	LOC409348	143	-22.46	409348	lethal(2) giant larvae protein homolog 1
ame-miR-3730-5p	LOC409348	141	-23.15	409348	lethal(2) giant larvae protein homolog 1
ame-miR-3730-5p	LOC409348	143	-22.46	409348	lethal(2) giant larvae protein homolog 1
ame-miR-3730-5p	LOC409348	141	-23.15	409348	lethal(2) giant larvae protein homolog 1
ame-miR-3730-5p	LOC409898	156	-21.72	409898	protein expanded-like
ame-miR-3730-5p	LOC409898	156	-20.78	409898	protein expanded-like
ame-miR-3730-5p	LOC409898	155	-21.72	409898	protein expanded-like
ame-miR-3730-5p	LOC409898	151	-21.85	409898	protein expanded-like
ame-miR-3730-5p	LOC409898	149	-25.51	409898	protein expanded-like
ame-miR-3730-5p	LOC409898	141	-23.43	409898	protein expanded-like
ame-miR-3730-5p	LOC409904	158	-21.01	409904	uncharacterized LOC409904
ame-miR-3730-5p	LOC409904	157	-20.82	409904	uncharacterized LOC409904
ame-miR-3730-5p	LOC409904	151	-26.22	409904	uncharacterized LOC409904
ame-miR-3730-5p	LOC409904	148	-27.38	409904	uncharacterized LOC409904
ame-miR-3730-5p	LOC409904	148	-21.21	409904	uncharacterized LOC409904
ame-miR-3730-5p	LOC409904	146	-22.56	409904	uncharacterized LOC409904
ame-miR-3730-5p	LOC409904	141	-27.96	409904	uncharacterized LOC409904
ame-miR-3730-5p	LOC409904	158	-21.01	409904	uncharacterized LOC409904
ame-miR-3730-5p	LOC409904	157	-20.82	409904	uncharacterized LOC409904
ame-miR-3730-5p	LOC409904	151	-26.22	409904	uncharacterized LOC409904
ame-miR-3730-5p	LOC409904	148	-27.38	409904	uncharacterized LOC409904
ame-miR-3730-5p	LOC409904	148	-21.21	409904	uncharacterized LOC409904
ame-miR-3730-5p	LOC409904	146	-22.56	409904	uncharacterized LOC409904
ame-miR-3730-5p	LOC409904	141	-27.96	409904	uncharacterized LOC409904
ame-miR-3730-5p	LOC409904	158	-21.01	409904	uncharacterized LOC409904
ame-miR-3730-5p	LOC409904	157	-20.82	409904	uncharacterized LOC409904
ame-miR-3730-5p	LOC409904	151	-26.22	409904	uncharacterized LOC409904
ame-miR-3730-5p	LOC409904	148	-27.38	409904	uncharacterized LOC409904
ame-miR-3730-5p	LOC409904	148	-21.21	409904	uncharacterized LOC409904
ame-miR-3730-5p	LOC409904	146	-22.56	409904	uncharacterized LOC409904
ame-miR-3730-5p	LOC409904	141	-27.96	409904	uncharacterized LOC409904
ame-miR-3730-5p	LOC409904	158	-21.01	409904	uncharacterized LOC409904
ame-miR-3730-5p	LOC409904	157	-20.82	409904	uncharacterized LOC409904
ame-miR-3730-5p	LOC409904	151	-26.22	409904	uncharacterized LOC409904
ame-miR-3730-5p	LOC409904	148	-27.38	409904	uncharacterized LOC409904
ame-miR-3730-5p	LOC409904	148	-21.21	409904	uncharacterized LOC409904
ame-miR-3730-5p	LOC409904	146	-22.56	409904	uncharacterized LOC409904
ame-miR-3730-5p	LOC409904	141	-27.96	409904	uncharacterized LOC409904
ame-miR-3730-5p	LOC409904	158	-21.01	409904	uncharacterized LOC409904
ame-miR-3730-5p	LOC409904	157	-20.82	409904	uncharacterized LOC409904
ame-miR-3730-5p	LOC409904	146	-22.56	409904	uncharacterized LOC409904
ame-miR-3730-5p	LOC409904	141	-27.96	409904	uncharacterized LOC409904
ame-miR-3730-5p	LOC409904	158	-21.01	409904	uncharacterized LOC409904
ame-miR-3730-5p	LOC409904	157	-20.82	409904	uncharacterized LOC409904
ame-miR-3730-5p	LOC409904	151	-26.22	409904	uncharacterized LOC409904
ame-miR-3730-5p	LOC409904	148	-27.38	409904	uncharacterized LOC409904
ame-miR-3730-5p	LOC409904	148	-21.21	409904	uncharacterized LOC409904
ame-miR-3730-5p	LOC409904	146	-22.56	409904	uncharacterized LOC409904
ame-miR-3730-5p	LOC409904	141	-27.96	409904	uncharacterized LOC409904
ame-miR-3730-5p	LOC409904	158	-21.01	409904	uncharacterized LOC409904
ame-miR-3730-5p	LOC409904	157	-20.82	409904	uncharacterized LOC409904
ame-miR-3730-5p	LOC409904	151	-26.22	409904	uncharacterized LOC409904
ame-miR-3730-5p	LOC409904	148	-27.38	409904	uncharacterized LOC409904
ame-miR-3730-5p	LOC409904	148	-21.21	409904	uncharacterized LOC409904
ame-miR-3730-5p	LOC409904	146	-22.56	409904	uncharacterized LOC409904
ame-miR-3730-5p	LOC409904	141	-27.96	409904	uncharacterized LOC409904
ame-miR-3730-5p	LOC409904	158	-21.01	409904	uncharacterized LOC409904
ame-miR-3730-5p	LOC409904	157	-20.82	409904	uncharacterized LOC409904
ame-miR-3730-5p	LOC409904	158	-21.01	409904	uncharacterized LOC409904
ame-miR-3730-5p	LOC409904	157	-20.82	409904	uncharacterized LOC409904
ame-miR-3730-5p	LOC409904	151	-26.22	409904	uncharacterized LOC409904
ame-miR-3730-5p	LOC409904	148	-27.38	409904	uncharacterized LOC409904
ame-miR-3730-5p	LOC409904	148	-21.21	409904	uncharacterized LOC409904
ame-miR-3730-5p	LOC409904	146	-22.56	409904	uncharacterized LOC409904
ame-miR-3730-5p	LOC409904	141	-27.96	409904	uncharacterized LOC409904
ame-miR-3730-5p	LOC409904	158	-21.01	409904	uncharacterized LOC409904
ame-miR-3730-5p	LOC409904	157	-20.82	409904	uncharacterized LOC409904
ame-miR-3730-5p	LOC409904	141	-27.96	409904	uncharacterized LOC409904
ame-miR-3730-5p	LOC410009	162	-21.11	410009	cadherin-related tumor suppressor
ame-miR-3730-5p	LOC410009	154	-21.74	410009	cadherin-related tumor suppressor
ame-miR-3730-5p	LOC410009	153	-21.98	410009	cadherin-related tumor suppressor
ame-miR-3730-5p	LOC410009	153	-22.36	410009	cadherin-related tumor suppressor
ame-miR-3730-5p	LOC410009	153	-20.51	410009	cadherin-related tumor suppressor
ame-miR-3730-5p	LOC410009	152	-23.56	410009	cadherin-related tumor suppressor
ame-miR-3730-5p	LOC410009	149	-20.4	410009	cadherin-related tumor suppressor
ame-miR-3730-5p	LOC410009	148	-24.22	410009	cadherin-related tumor suppressor
ame-miR-3730-5p	LOC410009	148	-20.23	410009	cadherin-related tumor suppressor
ame-miR-3730-5p	LOC410009	145	-22.14	410009	cadherin-related tumor suppressor
ame-miR-3730-5p	LOC410009	144	-21.21	410009	cadherin-related tumor suppressor
ame-miR-3730-5p	LOC410009	162	-21.11	410009	cadherin-related tumor suppressor
ame-miR-3730-5p	LOC410009	154	-21.74	410009	cadherin-related tumor suppressor
ame-miR-3730-5p	LOC410009	153	-21.98	410009	cadherin-related tumor suppressor
ame-miR-3730-5p	LOC410009	153	-22.36	410009	cadherin-related tumor suppressor
ame-miR-3730-5p	LOC410009	153	-20.51	410009	cadherin-related tumor suppressor
ame-miR-3730-5p	LOC410009	152	-23.56	410009	cadherin-related tumor suppressor
ame-miR-3730-5p	LOC410009	149	-20.4	410009	cadherin-related tumor suppressor
ame-miR-3730-5p	LOC410009	148	-24.22	410009	cadherin-related tumor suppressor
ame-miR-3730-5p	LOC410009	148	-20.23	410009	cadherin-related tumor suppressor
ame-miR-3730-5p	LOC410009	145	-22.14	410009	cadherin-related tumor suppressor
ame-miR-3730-5p	LOC410009	144	-21.21	410009	cadherin-related tumor suppressor
ame-miR-3730-5p	LOC410604	143	-25.88	410604	protein phosphatase PP2A 55 kDa regulatory subunit
ame-miR-3730-5p	LOC410604	150	-23.23	410604	protein phosphatase PP2A 55 kDa regulatory subunit
ame-miR-3730-5p	LOC410604	148	-21.4	410604	protein phosphatase PP2A 55 kDa regulatory subunit
ame-miR-3730-5p	LOC410604	143	-20.56	410604	protein phosphatase PP2A 55 kDa regulatory subunit
ame-miR-3730-5p	LOC410604	143	-25.88	410604	protein phosphatase PP2A 55 kDa regulatory subunit
ame-miR-3730-5p	LOC410604	143	-25.88	410604	protein phosphatase PP2A 55 kDa regulatory subunit
ame-miR-3730-5p	LOC410604	150	-23.23	410604	protein phosphatase PP2A 55 kDa regulatory subunit
ame-miR-3730-5p	LOC410604	148	-21.4	410604	protein phosphatase PP2A 55 kDa regulatory subunit
ame-miR-3730-5p	LOC410604	143	-20.56	410604	protein phosphatase PP2A 55 kDa regulatory subunit
ame-miR-3730-5p	LOC410604	143	-25.88	410604	protein phosphatase PP2A 55 kDa regulatory subunit
ame-miR-3730-5p	LOC410604	143	-25.88	410604	protein phosphatase PP2A 55 kDa regulatory subunit
ame-miR-3730-5p	LOC410604	150	-23.23	410604	protein phosphatase PP2A 55 kDa regulatory subunit
ame-miR-3730-5p	LOC410604	148	-21.4	410604	protein phosphatase PP2A 55 kDa regulatory subunit
ame-miR-3730-5p	LOC410604	143	-20.56	410604	protein phosphatase PP2A 55 kDa regulatory subunit
ame-miR-3730-5p	LOC410604	143	-25.88	410604	protein phosphatase PP2A 55 kDa regulatory subunit
ame-miR-3730-5p	LOC410604	143	-25.88	410604	protein phosphatase PP2A 55 kDa regulatory subunit
ame-miR-3730-5p	LOC410604	150	-23.23	410604	protein phosphatase PP2A 55 kDa regulatory subunit
ame-miR-3730-5p	LOC410604	148	-21.4	410604	protein phosphatase PP2A 55 kDa regulatory subunit
ame-miR-3730-5p	LOC410604	143	-20.56	410604	protein phosphatase PP2A 55 kDa regulatory subunit
ame-miR-3730-5p	LOC410604	143	-25.88	410604	protein phosphatase PP2A 55 kDa regulatory subunit
ame-miR-3730-5p	LOC410604	150	-23.23	410604	protein phosphatase PP2A 55 kDa regulatory subunit
ame-miR-3730-5p	LOC410604	148	-21.4	410604	protein phosphatase PP2A 55 kDa regulatory subunit
ame-miR-3730-5p	LOC410604	143	-20.56	410604	protein phosphatase PP2A 55 kDa regulatory subunit
ame-miR-3730-5p	LOC410604	143	-25.88	410604	protein phosphatase PP2A 55 kDa regulatory subunit
ame-miR-3730-5p	LOC413423	172	-29.61	413423	hemicentin-2
ame-miR-3730-5p	LOC413423	140	-20.09	413423	hemicentin-2
ame-miR-3730-5p	LOC413423	172	-29.61	413423	hemicentin-2
ame-miR-3730-5p	LOC413423	140	-20.09	413423	hemicentin-2
ame-miR-3730-5p	LOC413423	172	-29.61	413423	hemicentin-2
ame-miR-3730-5p	LOC413423	147	-23.11	413423	hemicentin-2
ame-miR-3730-5p	LOC413423	145	-20.24	413423	hemicentin-2
ame-miR-3730-5p	LOC413423	142	-20.4	413423	hemicentin-2
ame-miR-3730-5p	LOC413423	140	-20.09	413423	hemicentin-2
ame-miR-3730-5p	LOC413440	161	-22.77	413440	protein kibra
ame-miR-3730-5p	LOC413440	161	-22.77	413440	protein kibra
ame-miR-3730-5p	LOC413440	161	-22.77	413440	protein kibra
ame-miR-3730-5p	LOC413669	147	-23.26	413669	protein lap4
ame-miR-3730-5p	LOC413669	146	-22.04	413669	protein lap4
ame-miR-3730-5p	LOC413669	141	-20.02	413669	protein lap4
ame-miR-3730-5p	LOC413669	147	-23.26	413669	protein lap4
ame-miR-3730-5p	LOC413669	146	-22.04	413669	protein lap4
ame-miR-3730-5p	LOC413669	141	-20.02	413669	protein lap4
ame-miR-3730-5p	LOC413669	147	-23.26	413669	protein lap4
ame-miR-3730-5p	LOC413669	146	-22.04	413669	protein lap4
ame-miR-3730-5p	LOC413669	141	-20.02	413669	protein lap4
ame-miR-3730-5p	LOC413669	147	-23.26	413669	protein lap4
ame-miR-3730-5p	LOC413669	146	-22.04	413669	protein lap4
ame-miR-3730-5p	LOC413669	141	-20.02	413669	protein lap4
ame-miR-3730-5p	LOC413669	147	-23.26	413669	protein lap4
ame-miR-3730-5p	LOC413669	146	-22.04	413669	protein lap4
ame-miR-3730-5p	LOC413669	141	-20.02	413669	protein lap4
ame-miR-3730-5p	LOC413669	147	-23.26	413669	protein lap4
ame-miR-3730-5p	LOC413669	146	-22.04	413669	protein lap4
ame-miR-3730-5p	LOC413669	141	-20.02	413669	protein lap4
ame-miR-3730-5p	LOC413669	147	-23.26	413669	protein lap4
ame-miR-3730-5p	LOC413669	141	-20.02	413669	protein lap4
ame-miR-3730-5p	LOC413669	147	-23.26	413669	protein lap4
ame-miR-3730-5p	LOC413669	146	-22.04	413669	protein lap4
ame-miR-3730-5p	LOC413669	141	-20.02	413669	protein lap4
ame-miR-3730-5p	LOC413669	147	-23.26	413669	protein lap4
ame-miR-3730-5p	LOC413669	146	-22.04	413669	protein lap4
ame-miR-3730-5p	LOC413669	141	-20.02	413669	protein lap4
ame-miR-3730-5p	LOC413669	147	-23.26	413669	protein lap4
ame-miR-3730-5p	LOC413669	146	-22.04	413669	protein lap4
ame-miR-3730-5p	LOC413669	141	-20.02	413669	protein lap4
ame-miR-3730-5p	LOC413669	147	-23.26	413669	protein lap4
ame-miR-3730-5p	LOC413669	146	-22.04	413669	protein lap4
ame-miR-3730-5p	LOC413669	141	-20.02	413669	protein lap4
ame-miR-3730-5p	LOC413834	158	-22.54	413834	atypical protein kinase C
ame-miR-3730-5p	LOC413834	140	-20.53	413834	atypical protein kinase C
ame-miR-3730-5p	LOC413834	158	-22.54	413834	atypical protein kinase C
ame-miR-3730-5p	LOC413834	140	-20.53	413834	atypical protein kinase C
ame-miR-3730-5p	LOC413834	158	-22.54	413834	atypical protein kinase C
ame-miR-3730-5p	LOC413834	140	-20.53	413834	atypical protein kinase C
ame-miR-3730-5p	LOC413834	158	-22.54	413834	atypical protein kinase C
ame-miR-3730-5p	LOC413834	140	-20.53	413834	atypical protein kinase C
ame-miR-3730-5p	LOC551176	141	-24.23	551176	actin, clone 205
ame-miR-3730-5p	LOC551369	141	-24.23	551369	actin, clone 205
ame-miR-3730-5p	LOC551706	169	-26.75	551706	unconventional myosin-IXb
ame-miR-3730-5p	LOC551706	161	-21.72	551706	unconventional myosin-IXb
ame-miR-3730-5p	LOC551706	160	-20.89	551706	unconventional myosin-IXb
ame-miR-3730-5p	LOC551706	157	-23.03	551706	unconventional myosin-IXb
ame-miR-3730-5p	LOC551706	155	-20.19	551706	unconventional myosin-IXb
ame-miR-3730-5p	LOC551706	155	-23.27	551706	unconventional myosin-IXb
ame-miR-3730-5p	LOC551706	152	-20.29	551706	unconventional myosin-IXb
ame-miR-3730-5p	LOC551706	148	-21.58	551706	unconventional myosin-IXb
ame-miR-3730-5p	LOC551706	148	-20.25	551706	unconventional myosin-IXb
ame-miR-3730-5p	LOC551706	145	-22.91	551706	unconventional myosin-IXb
ame-miR-3730-5p	LOC551706	145	-20.42	551706	unconventional myosin-IXb
ame-miR-3730-5p	LOC551706	142	-20.38	551706	unconventional myosin-IXb
ame-miR-3730-5p	LOC551706	141	-22.8	551706	unconventional myosin-IXb
ame-miR-3730-5p	LOC551706	140	-22.97	551706	unconventional myosin-IXb
ame-miR-3730-5p	LOC551706	169	-26.75	551706	unconventional myosin-IXb
ame-miR-3730-5p	LOC551706	161	-21.72	551706	unconventional myosin-IXb
ame-miR-3730-5p	LOC551706	160	-20.89	551706	unconventional myosin-IXb
ame-miR-3730-5p	LOC551706	157	-23.03	551706	unconventional myosin-IXb
ame-miR-3730-5p	LOC551706	155	-20.19	551706	unconventional myosin-IXb
ame-miR-3730-5p	LOC551706	155	-23.27	551706	unconventional myosin-IXb
ame-miR-3730-5p	LOC551706	152	-20.29	551706	unconventional myosin-IXb
ame-miR-3730-5p	LOC551706	148	-21.58	551706	unconventional myosin-IXb
ame-miR-3730-5p	LOC551706	148	-20.25	551706	unconventional myosin-IXb
ame-miR-3730-5p	LOC551706	145	-22.91	551706	unconventional myosin-IXb
ame-miR-3730-5p	LOC551706	145	-20.42	551706	unconventional myosin-IXb
ame-miR-3730-5p	LOC551706	142	-20.38	551706	unconventional myosin-IXb
ame-miR-3730-5p	LOC551706	141	-22.8	551706	unconventional myosin-IXb
ame-miR-3730-5p	LOC551706	140	-22.97	551706	unconventional myosin-IXb
ame-miR-3730-5p	LOC551706	169	-26.75	551706	unconventional myosin-IXb
ame-miR-3730-5p	LOC551706	161	-21.72	551706	unconventional myosin-IXb
ame-miR-3730-5p	LOC551706	160	-20.89	551706	unconventional myosin-IXb
ame-miR-3730-5p	LOC551706	157	-23.03	551706	unconventional myosin-IXb
ame-miR-3730-5p	LOC551706	155	-20.19	551706	unconventional myosin-IXb
ame-miR-3730-5p	LOC551706	155	-23.27	551706	unconventional myosin-IXb
ame-miR-3730-5p	LOC551706	152	-20.29	551706	unconventional myosin-IXb
ame-miR-3730-5p	LOC551706	148	-21.58	551706	unconventional myosin-IXb
ame-miR-3730-5p	LOC551706	148	-20.25	551706	unconventional myosin-IXb
ame-miR-3730-5p	LOC551706	145	-22.91	551706	unconventional myosin-IXb
ame-miR-3730-5p	LOC551706	145	-20.42	551706	unconventional myosin-IXb
ame-miR-3730-5p	LOC551706	142	-20.38	551706	unconventional myosin-IXb
ame-miR-3730-5p	LOC551706	141	-22.8	551706	unconventional myosin-IXb
ame-miR-3730-5p	LOC551706	140	-22.97	551706	unconventional myosin-IXb
ame-miR-3730-5p	LOC551706	169	-26.75	551706	unconventional myosin-IXb
ame-miR-3730-5p	LOC551706	161	-21.72	551706	unconventional myosin-IXb
ame-miR-3730-5p	LOC551706	160	-20.89	551706	unconventional myosin-IXb
ame-miR-3730-5p	LOC551706	157	-23.03	551706	unconventional myosin-IXb
ame-miR-3730-5p	LOC551706	155	-20.19	551706	unconventional myosin-IXb
ame-miR-3730-5p	LOC551706	155	-23.27	551706	unconventional myosin-IXb
ame-miR-3730-5p	LOC551706	152	-20.29	551706	unconventional myosin-IXb
ame-miR-3730-5p	LOC551706	148	-21.58	551706	unconventional myosin-IXb
ame-miR-3730-5p	LOC551706	148	-20.25	551706	unconventional myosin-IXb
ame-miR-3730-5p	LOC551706	145	-22.91	551706	unconventional myosin-IXb
ame-miR-3730-5p	LOC551706	145	-20.42	551706	unconventional myosin-IXb
ame-miR-3730-5p	LOC551706	142	-20.38	551706	unconventional myosin-IXb
ame-miR-3730-5p	LOC551706	141	-22.8	551706	unconventional myosin-IXb
ame-miR-3730-5p	LOC551706	140	-22.97	551706	unconventional myosin-IXb
ame-miR-3730-5p	LOC551706	169	-26.75	551706	unconventional myosin-IXb
ame-miR-3730-5p	LOC551706	161	-21.72	551706	unconventional myosin-IXb
ame-miR-3730-5p	LOC551706	160	-20.89	551706	unconventional myosin-IXb
ame-miR-3730-5p	LOC551706	157	-23.03	551706	unconventional myosin-IXb
ame-miR-3730-5p	LOC551706	155	-20.19	551706	unconventional myosin-IXb
ame-miR-3730-5p	LOC551706	155	-23.27	551706	unconventional myosin-IXb
ame-miR-3730-5p	LOC551706	152	-20.29	551706	unconventional myosin-IXb
ame-miR-3730-5p	LOC551706	148	-21.58	551706	unconventional myosin-IXb
ame-miR-3730-5p	LOC551706	148	-20.25	551706	unconventional myosin-IXb
ame-miR-3730-5p	LOC551706	145	-22.91	551706	unconventional myosin-IXb
ame-miR-3730-5p	LOC551706	145	-20.42	551706	unconventional myosin-IXb
ame-miR-3730-5p	LOC551706	142	-20.38	551706	unconventional myosin-IXb
ame-miR-3730-5p	LOC551706	141	-22.8	551706	unconventional myosin-IXb
ame-miR-3730-5p	LOC551706	140	-22.97	551706	unconventional myosin-IXb
ame-miR-3730-5p	LOC551706	169	-26.75	551706	unconventional myosin-IXb
ame-miR-3730-5p	LOC551706	161	-21.72	551706	unconventional myosin-IXb
ame-miR-3730-5p	LOC551706	160	-20.89	551706	unconventional myosin-IXb
ame-miR-3730-5p	LOC551706	157	-23.03	551706	unconventional myosin-IXb
ame-miR-3730-5p	LOC551706	155	-20.19	551706	unconventional myosin-IXb
ame-miR-3730-5p	LOC551706	155	-23.27	551706	unconventional myosin-IXb
ame-miR-3730-5p	LOC551706	152	-20.29	551706	unconventional myosin-IXb
ame-miR-3730-5p	LOC551706	148	-21.58	551706	unconventional myosin-IXb
ame-miR-3730-5p	LOC551706	148	-20.25	551706	unconventional myosin-IXb
ame-miR-3730-5p	LOC551706	145	-22.91	551706	unconventional myosin-IXb
ame-miR-3730-5p	LOC551706	145	-20.42	551706	unconventional myosin-IXb
ame-miR-3730-5p	LOC551706	142	-20.38	551706	unconventional myosin-IXb
ame-miR-3730-5p	LOC551706	141	-22.8	551706	unconventional myosin-IXb
ame-miR-3730-5p	LOC551706	140	-22.97	551706	unconventional myosin-IXb
ame-miR-3730-5p	LOC551706	169	-26.75	551706	unconventional myosin-IXb
ame-miR-3730-5p	LOC551706	161	-21.72	551706	unconventional myosin-IXb
ame-miR-3730-5p	LOC551706	160	-20.89	551706	unconventional myosin-IXb
ame-miR-3730-5p	LOC551706	157	-23.03	551706	unconventional myosin-IXb
ame-miR-3730-5p	LOC551706	155	-20.19	551706	unconventional myosin-IXb
ame-miR-3730-5p	LOC551706	155	-23.27	551706	unconventional myosin-IXb
ame-miR-3730-5p	LOC551706	152	-20.29	551706	unconventional myosin-IXb
ame-miR-3730-5p	LOC551706	148	-21.58	551706	unconventional myosin-IXb
ame-miR-3730-5p	LOC551706	148	-20.25	551706	unconventional myosin-IXb
ame-miR-3730-5p	LOC551706	145	-22.91	551706	unconventional myosin-IXb
ame-miR-3730-5p	LOC551706	145	-20.42	551706	unconventional myosin-IXb
ame-miR-3730-5p	LOC551706	142	-20.38	551706	unconventional myosin-IXb
ame-miR-3730-5p	LOC551706	141	-22.8	551706	unconventional myosin-IXb
ame-miR-3730-5p	LOC551706	140	-22.97	551706	unconventional myosin-IXb
ame-miR-3730-5p	LOC551706	169	-26.75	551706	unconventional myosin-IXb
ame-miR-3730-5p	LOC551706	161	-21.72	551706	unconventional myosin-IXb
ame-miR-3730-5p	LOC551706	157	-23.03	551706	unconventional myosin-IXb
ame-miR-3730-5p	LOC551706	142	-20.38	551706	unconventional myosin-IXb
ame-miR-3730-5p	LOC551706	140	-22.97	551706	unconventional myosin-IXb
ame-miR-3730-5p	LOC551706	169	-26.75	551706	unconventional myosin-IXb
ame-miR-3730-5p	LOC551706	161	-21.72	551706	unconventional myosin-IXb
ame-miR-3730-5p	LOC551706	160	-20.89	551706	unconventional myosin-IXb
ame-miR-3730-5p	LOC551706	157	-23.03	551706	unconventional myosin-IXb
ame-miR-3730-5p	LOC551706	155	-20.19	551706	unconventional myosin-IXb
ame-miR-3730-5p	LOC551706	155	-23.27	551706	unconventional myosin-IXb
ame-miR-3730-5p	LOC551706	152	-20.29	551706	unconventional myosin-IXb
ame-miR-3730-5p	LOC551706	148	-21.58	551706	unconventional myosin-IXb
ame-miR-3730-5p	LOC551706	148	-20.25	551706	unconventional myosin-IXb
ame-miR-3730-5p	LOC551706	145	-22.91	551706	unconventional myosin-IXb
ame-miR-3730-5p	LOC551706	145	-20.42	551706	unconventional myosin-IXb
ame-miR-3730-5p	LOC551706	142	-20.38	551706	unconventional myosin-IXb
ame-miR-3730-5p	LOC551706	141	-22.8	551706	unconventional myosin-IXb
ame-miR-3730-5p	LOC551706	140	-22.97	551706	unconventional myosin-IXb
ame-miR-3730-5p	LOC551706	169	-26.75	551706	unconventional myosin-IXb
ame-miR-3730-5p	LOC551706	161	-21.72	551706	unconventional myosin-IXb
ame-miR-3730-5p	LOC551706	160	-20.89	551706	unconventional myosin-IXb
ame-miR-3730-5p	LOC551706	157	-23.03	551706	unconventional myosin-IXb
ame-miR-3730-5p	LOC551706	155	-20.19	551706	unconventional myosin-IXb
ame-miR-3730-5p	LOC551706	155	-23.27	551706	unconventional myosin-IXb
ame-miR-3730-5p	LOC551706	152	-20.29	551706	unconventional myosin-IXb
ame-miR-3730-5p	LOC551706	148	-21.58	551706	unconventional myosin-IXb
ame-miR-3730-5p	LOC551706	148	-20.25	551706	unconventional myosin-IXb
ame-miR-3730-5p	LOC551706	145	-22.91	551706	unconventional myosin-IXb
ame-miR-3730-5p	LOC551706	145	-20.42	551706	unconventional myosin-IXb
ame-miR-3730-5p	LOC551706	142	-20.38	551706	unconventional myosin-IXb
ame-miR-3730-5p	LOC551706	141	-22.8	551706	unconventional myosin-IXb
ame-miR-3730-5p	LOC551706	140	-22.97	551706	unconventional myosin-IXb
ame-miR-3730-5p	LOC551706	169	-26.75	551706	unconventional myosin-IXb
ame-miR-3730-5p	LOC551706	161	-21.72	551706	unconventional myosin-IXb
ame-miR-3730-5p	LOC551706	160	-20.89	551706	unconventional myosin-IXb
ame-miR-3730-5p	LOC551706	157	-23.03	551706	unconventional myosin-IXb
ame-miR-3730-5p	LOC551706	155	-20.19	551706	unconventional myosin-IXb
ame-miR-3730-5p	LOC551706	155	-23.27	551706	unconventional myosin-IXb
ame-miR-3730-5p	LOC551706	152	-20.29	551706	unconventional myosin-IXb
ame-miR-3730-5p	LOC551706	148	-21.58	551706	unconventional myosin-IXb
ame-miR-3730-5p	LOC551706	148	-20.25	551706	unconventional myosin-IXb
ame-miR-3730-5p	LOC551706	145	-22.91	551706	unconventional myosin-IXb
ame-miR-3730-5p	LOC551706	145	-20.42	551706	unconventional myosin-IXb
ame-miR-3730-5p	LOC551706	142	-20.38	551706	unconventional myosin-IXb
ame-miR-3730-5p	LOC551706	141	-22.8	551706	unconventional myosin-IXb
ame-miR-3730-5p	LOC551706	140	-22.97	551706	unconventional myosin-IXb
ame-miR-3730-5p	LOC551706	169	-26.75	551706	unconventional myosin-IXb
ame-miR-3730-5p	LOC551706	161	-21.72	551706	unconventional myosin-IXb
ame-miR-3730-5p	LOC551706	160	-20.89	551706	unconventional myosin-IXb
ame-miR-3730-5p	LOC551706	157	-23.03	551706	unconventional myosin-IXb
ame-miR-3730-5p	LOC551706	155	-20.19	551706	unconventional myosin-IXb
ame-miR-3730-5p	LOC551706	155	-23.27	551706	unconventional myosin-IXb
ame-miR-3730-5p	LOC551706	152	-20.29	551706	unconventional myosin-IXb
ame-miR-3730-5p	LOC551706	148	-21.58	551706	unconventional myosin-IXb
ame-miR-3730-5p	LOC551706	148	-20.25	551706	unconventional myosin-IXb
ame-miR-3730-5p	LOC551706	145	-22.91	551706	unconventional myosin-IXb
ame-miR-3730-5p	LOC551706	145	-20.42	551706	unconventional myosin-IXb
ame-miR-3730-5p	LOC551706	142	-20.38	551706	unconventional myosin-IXb
ame-miR-3730-5p	LOC551706	141	-22.8	551706	unconventional myosin-IXb
ame-miR-3730-5p	LOC551706	140	-22.97	551706	unconventional myosin-IXb
ame-miR-3730-5p	LOC552079	181	-31.06	552079	homeobox protein homothorax
ame-miR-3730-5p	LOC552079	170	-24.49	552079	homeobox protein homothorax
ame-miR-3730-5p	LOC552079	166	-22.51	552079	homeobox protein homothorax
ame-miR-3730-5p	LOC552079	164	-21.79	552079	homeobox protein homothorax
ame-miR-3730-5p	LOC552079	164	-24.22	552079	homeobox protein homothorax
ame-miR-3730-5p	LOC552079	163	-24.25	552079	homeobox protein homothorax
ame-miR-3730-5p	LOC552079	163	-22.17	552079	homeobox protein homothorax
ame-miR-3730-5p	LOC552079	162	-25.74	552079	homeobox protein homothorax
ame-miR-3730-5p	LOC552079	161	-20.25	552079	homeobox protein homothorax
ame-miR-3730-5p	LOC552079	161	-26.39	552079	homeobox protein homothorax
ame-miR-3730-5p	LOC552079	161	-22.33	552079	homeobox protein homothorax
ame-miR-3730-5p	LOC552079	160	-26.22	552079	homeobox protein homothorax
ame-miR-3730-5p	LOC552079	160	-22.82	552079	homeobox protein homothorax
ame-miR-3730-5p	LOC552079	160	-26.13	552079	homeobox protein homothorax
ame-miR-3730-5p	LOC552079	160	-20.71	552079	homeobox protein homothorax
ame-miR-3730-5p	LOC552079	159	-20.31	552079	homeobox protein homothorax
ame-miR-3730-5p	LOC552079	159	-21.2	552079	homeobox protein homothorax
ame-miR-3730-5p	LOC552079	157	-21.56	552079	homeobox protein homothorax
ame-miR-3730-5p	LOC552079	157	-21.48	552079	homeobox protein homothorax
ame-miR-3730-5p	LOC552079	156	-23.3	552079	homeobox protein homothorax
ame-miR-3730-5p	LOC552079	156	-25.27	552079	homeobox protein homothorax
ame-miR-3730-5p	LOC552079	155	-20.04	552079	homeobox protein homothorax
ame-miR-3730-5p	LOC552079	155	-23.16	552079	homeobox protein homothorax
ame-miR-3730-5p	LOC552079	155	-24.77	552079	homeobox protein homothorax
ame-miR-3730-5p	LOC552079	154	-27.22	552079	homeobox protein homothorax
ame-miR-3730-5p	LOC552079	153	-22.52	552079	homeobox protein homothorax
ame-miR-3730-5p	LOC552079	152	-25.58	552079	homeobox protein homothorax
ame-miR-3730-5p	LOC552079	152	-25.58	552079	homeobox protein homothorax
ame-miR-3730-5p	LOC552079	151	-22.42	552079	homeobox protein homothorax
ame-miR-3730-5p	LOC552079	151	-22.14	552079	homeobox protein homothorax
ame-miR-3730-5p	LOC552079	151	-23.95	552079	homeobox protein homothorax
ame-miR-3730-5p	LOC552079	149	-20.08	552079	homeobox protein homothorax
ame-miR-3730-5p	LOC552079	149	-25.7	552079	homeobox protein homothorax
ame-miR-3730-5p	LOC552079	149	-20.83	552079	homeobox protein homothorax
ame-miR-3730-5p	LOC552079	149	-21.99	552079	homeobox protein homothorax
ame-miR-3730-5p	LOC552079	148	-20.61	552079	homeobox protein homothorax
ame-miR-3730-5p	LOC552079	148	-23.21	552079	homeobox protein homothorax
ame-miR-3730-5p	LOC552079	148	-23	552079	homeobox protein homothorax
ame-miR-3730-5p	LOC552079	148	-26.58	552079	homeobox protein homothorax
ame-miR-3730-5p	LOC552079	147	-20.11	552079	homeobox protein homothorax
ame-miR-3730-5p	LOC552079	147	-20.36	552079	homeobox protein homothorax
ame-miR-3730-5p	LOC552079	147	-20.11	552079	homeobox protein homothorax
ame-miR-3730-5p	LOC552079	146	-24.68	552079	homeobox protein homothorax
ame-miR-3730-5p	LOC552079	146	-21.58	552079	homeobox protein homothorax
ame-miR-3730-5p	LOC552079	145	-25.87	552079	homeobox protein homothorax
ame-miR-3730-5p	LOC552079	145	-25.56	552079	homeobox protein homothorax
ame-miR-3730-5p	LOC552079	145	-21.84	552079	homeobox protein homothorax
ame-miR-3730-5p	LOC552079	145	-22.04	552079	homeobox protein homothorax
ame-miR-3730-5p	LOC552079	145	-27.92	552079	homeobox protein homothorax
ame-miR-3730-5p	LOC552079	145	-23.42	552079	homeobox protein homothorax
ame-miR-3730-5p	LOC552079	145	-23.58	552079	homeobox protein homothorax
ame-miR-3730-5p	LOC552079	144	-26.4	552079	homeobox protein homothorax
ame-miR-3730-5p	LOC552079	144	-22.97	552079	homeobox protein homothorax
ame-miR-3730-5p	LOC552079	144	-24.82	552079	homeobox protein homothorax
ame-miR-3730-5p	LOC552079	143	-28.09	552079	homeobox protein homothorax
ame-miR-3730-5p	LOC552079	143	-21.98	552079	homeobox protein homothorax
ame-miR-3730-5p	LOC552079	143	-23.7	552079	homeobox protein homothorax
ame-miR-3730-5p	LOC552079	143	-20.76	552079	homeobox protein homothorax
ame-miR-3730-5p	LOC552079	143	-21.68	552079	homeobox protein homothorax
ame-miR-3730-5p	LOC552079	142	-20.34	552079	homeobox protein homothorax
ame-miR-3730-5p	LOC552079	142	-21.66	552079	homeobox protein homothorax
ame-miR-3730-5p	LOC552079	142	-25.38	552079	homeobox protein homothorax
ame-miR-3730-5p	LOC552079	142	-30.64	552079	homeobox protein homothorax
ame-miR-3730-5p	LOC552079	141	-20.71	552079	homeobox protein homothorax
ame-miR-3730-5p	LOC552079	141	-24.62	552079	homeobox protein homothorax
ame-miR-3730-5p	LOC552079	141	-21.99	552079	homeobox protein homothorax
ame-miR-3730-5p	LOC552079	141	-20.06	552079	homeobox protein homothorax
ame-miR-3730-5p	LOC552079	141	-21.59	552079	homeobox protein homothorax
ame-miR-3730-5p	LOC552079	140	-22.12	552079	homeobox protein homothorax
ame-miR-3730-5p	LOC552079	140	-20.5	552079	homeobox protein homothorax
ame-miR-3730-5p	LOC552079	140	-24.04	552079	homeobox protein homothorax
ame-miR-3730-5p	LOC552079	140	-20.7	552079	homeobox protein homothorax
ame-miR-3730-5p	LOC552079	140	-22.05	552079	homeobox protein homothorax
ame-miR-3730-5p	LOC552079	140	-23.88	552079	homeobox protein homothorax
ame-miR-3730-5p	LOC552079	181	-31.06	552079	homeobox protein homothorax
ame-miR-3730-5p	LOC552079	170	-24.49	552079	homeobox protein homothorax
ame-miR-3730-5p	LOC552079	168	-29.4	552079	homeobox protein homothorax
ame-miR-3730-5p	LOC552079	166	-22.51	552079	homeobox protein homothorax
ame-miR-3730-5p	LOC552079	164	-21.79	552079	homeobox protein homothorax
ame-miR-3730-5p	LOC552079	164	-24.22	552079	homeobox protein homothorax
ame-miR-3730-5p	LOC552079	163	-24.25	552079	homeobox protein homothorax
ame-miR-3730-5p	LOC552079	163	-22.17	552079	homeobox protein homothorax
ame-miR-3730-5p	LOC552079	162	-25.74	552079	homeobox protein homothorax
ame-miR-3730-5p	LOC552079	161	-20.71	552079	homeobox protein homothorax
ame-miR-3730-5p	LOC552079	161	-20.25	552079	homeobox protein homothorax
ame-miR-3730-5p	LOC552079	161	-26.39	552079	homeobox protein homothorax
ame-miR-3730-5p	LOC552079	161	-22.33	552079	homeobox protein homothorax
ame-miR-3730-5p	LOC552079	160	-26.22	552079	homeobox protein homothorax
ame-miR-3730-5p	LOC552079	160	-22.82	552079	homeobox protein homothorax
ame-miR-3730-5p	LOC552079	160	-26.13	552079	homeobox protein homothorax
ame-miR-3730-5p	LOC552079	160	-20.71	552079	homeobox protein homothorax
ame-miR-3730-5p	LOC552079	159	-20.31	552079	homeobox protein homothorax
ame-miR-3730-5p	LOC552079	159	-21.2	552079	homeobox protein homothorax
ame-miR-3730-5p	LOC552079	157	-21.56	552079	homeobox protein homothorax
ame-miR-3730-5p	LOC552079	157	-21.48	552079	homeobox protein homothorax
ame-miR-3730-5p	LOC552079	156	-23.3	552079	homeobox protein homothorax
ame-miR-3730-5p	LOC552079	156	-25.27	552079	homeobox protein homothorax
ame-miR-3730-5p	LOC552079	155	-20.04	552079	homeobox protein homothorax
ame-miR-3730-5p	LOC552079	155	-23.16	552079	homeobox protein homothorax
ame-miR-3730-5p	LOC552079	155	-24.77	552079	homeobox protein homothorax
ame-miR-3730-5p	LOC552079	154	-24.4	552079	homeobox protein homothorax
ame-miR-3730-5p	LOC552079	154	-27.22	552079	homeobox protein homothorax
ame-miR-3730-5p	LOC552079	153	-22.52	552079	homeobox protein homothorax
ame-miR-3730-5p	LOC552079	152	-21.33	552079	homeobox protein homothorax
ame-miR-3730-5p	LOC552079	152	-22.27	552079	homeobox protein homothorax
ame-miR-3730-5p	LOC552079	152	-25.58	552079	homeobox protein homothorax
ame-miR-3730-5p	LOC552079	152	-25.58	552079	homeobox protein homothorax
ame-miR-3730-5p	LOC552079	151	-22.42	552079	homeobox protein homothorax
ame-miR-3730-5p	LOC552079	151	-22.14	552079	homeobox protein homothorax
ame-miR-3730-5p	LOC552079	151	-23.95	552079	homeobox protein homothorax
ame-miR-3730-5p	LOC552079	149	-28.92	552079	homeobox protein homothorax
ame-miR-3730-5p	LOC552079	149	-20.08	552079	homeobox protein homothorax
ame-miR-3730-5p	LOC552079	149	-25.7	552079	homeobox protein homothorax
ame-miR-3730-5p	LOC552079	149	-20.83	552079	homeobox protein homothorax
ame-miR-3730-5p	LOC552079	149	-21.99	552079	homeobox protein homothorax
ame-miR-3730-5p	LOC552079	148	-20.61	552079	homeobox protein homothorax
ame-miR-3730-5p	LOC552079	148	-23.21	552079	homeobox protein homothorax
ame-miR-3730-5p	LOC552079	148	-23	552079	homeobox protein homothorax
ame-miR-3730-5p	LOC552079	148	-26.58	552079	homeobox protein homothorax
ame-miR-3730-5p	LOC552079	147	-25.14	552079	homeobox protein homothorax
ame-miR-3730-5p	LOC552079	147	-20.11	552079	homeobox protein homothorax
ame-miR-3730-5p	LOC552079	147	-20.36	552079	homeobox protein homothorax
ame-miR-3730-5p	LOC552079	147	-20.11	552079	homeobox protein homothorax
ame-miR-3730-5p	LOC552079	146	-24.68	552079	homeobox protein homothorax
ame-miR-3730-5p	LOC552079	146	-21.58	552079	homeobox protein homothorax
ame-miR-3730-5p	LOC552079	145	-25.87	552079	homeobox protein homothorax
ame-miR-3730-5p	LOC552079	145	-25.56	552079	homeobox protein homothorax
ame-miR-3730-5p	LOC552079	145	-21.84	552079	homeobox protein homothorax
ame-miR-3730-5p	LOC552079	145	-22.04	552079	homeobox protein homothorax
ame-miR-3730-5p	LOC552079	145	-27.92	552079	homeobox protein homothorax
ame-miR-3730-5p	LOC552079	145	-23.42	552079	homeobox protein homothorax
ame-miR-3730-5p	LOC552079	145	-23.58	552079	homeobox protein homothorax
ame-miR-3730-5p	LOC552079	144	-22.28	552079	homeobox protein homothorax
ame-miR-3730-5p	LOC552079	144	-26.4	552079	homeobox protein homothorax
ame-miR-3730-5p	LOC552079	144	-22.97	552079	homeobox protein homothorax
ame-miR-3730-5p	LOC552079	144	-24.82	552079	homeobox protein homothorax
ame-miR-3730-5p	LOC552079	143	-28.09	552079	homeobox protein homothorax
ame-miR-3730-5p	LOC552079	143	-21.98	552079	homeobox protein homothorax
ame-miR-3730-5p	LOC552079	143	-23.7	552079	homeobox protein homothorax
ame-miR-3730-5p	LOC552079	143	-20.76	552079	homeobox protein homothorax
ame-miR-3730-5p	LOC552079	143	-21.68	552079	homeobox protein homothorax
ame-miR-3730-5p	LOC552079	142	-20.34	552079	homeobox protein homothorax
ame-miR-3730-5p	LOC552079	142	-21.66	552079	homeobox protein homothorax
ame-miR-3730-5p	LOC552079	142	-25.38	552079	homeobox protein homothorax
ame-miR-3730-5p	LOC552079	142	-30.64	552079	homeobox protein homothorax
ame-miR-3730-5p	LOC552079	141	-22.52	552079	homeobox protein homothorax
ame-miR-3730-5p	LOC552079	141	-21.29	552079	homeobox protein homothorax
ame-miR-3730-5p	LOC552079	141	-20.71	552079	homeobox protein homothorax
ame-miR-3730-5p	LOC552079	141	-24.62	552079	homeobox protein homothorax
ame-miR-3730-5p	LOC552079	141	-21.99	552079	homeobox protein homothorax
ame-miR-3730-5p	LOC552079	141	-20.06	552079	homeobox protein homothorax
ame-miR-3730-5p	LOC552079	141	-21.59	552079	homeobox protein homothorax
ame-miR-3730-5p	LOC552079	140	-22.12	552079	homeobox protein homothorax
ame-miR-3730-5p	LOC552079	140	-20.5	552079	homeobox protein homothorax
ame-miR-3730-5p	LOC552079	140	-24.04	552079	homeobox protein homothorax
ame-miR-3730-5p	LOC552079	140	-20.7	552079	homeobox protein homothorax
ame-miR-3730-5p	LOC552079	140	-22.05	552079	homeobox protein homothorax
ame-miR-3730-5p	LOC552079	140	-23.88	552079	homeobox protein homothorax
ame-miR-3730-5p	LOC552079	181	-31.06	552079	homeobox protein homothorax
ame-miR-3730-5p	LOC552079	170	-24.49	552079	homeobox protein homothorax
ame-miR-3730-5p	LOC552079	166	-22.51	552079	homeobox protein homothorax
ame-miR-3730-5p	LOC552079	164	-21.79	552079	homeobox protein homothorax
ame-miR-3730-5p	LOC552079	164	-24.22	552079	homeobox protein homothorax
ame-miR-3730-5p	LOC552079	163	-24.25	552079	homeobox protein homothorax
ame-miR-3730-5p	LOC552079	163	-22.17	552079	homeobox protein homothorax
ame-miR-3730-5p	LOC552079	162	-25.74	552079	homeobox protein homothorax
ame-miR-3730-5p	LOC552079	161	-20.25	552079	homeobox protein homothorax
ame-miR-3730-5p	LOC552079	161	-26.39	552079	homeobox protein homothorax
ame-miR-3730-5p	LOC552079	161	-22.33	552079	homeobox protein homothorax
ame-miR-3730-5p	LOC552079	160	-26.22	552079	homeobox protein homothorax
ame-miR-3730-5p	LOC552079	160	-22.82	552079	homeobox protein homothorax
ame-miR-3730-5p	LOC552079	160	-26.13	552079	homeobox protein homothorax
ame-miR-3730-5p	LOC552079	160	-20.71	552079	homeobox protein homothorax
ame-miR-3730-5p	LOC552079	159	-20.31	552079	homeobox protein homothorax
ame-miR-3730-5p	LOC552079	159	-21.2	552079	homeobox protein homothorax
ame-miR-3730-5p	LOC552079	157	-21.56	552079	homeobox protein homothorax
ame-miR-3730-5p	LOC552079	157	-21.48	552079	homeobox protein homothorax
ame-miR-3730-5p	LOC552079	156	-23.3	552079	homeobox protein homothorax
ame-miR-3730-5p	LOC552079	156	-25.27	552079	homeobox protein homothorax
ame-miR-3730-5p	LOC552079	155	-20.04	552079	homeobox protein homothorax
ame-miR-3730-5p	LOC552079	155	-23.16	552079	homeobox protein homothorax
ame-miR-3730-5p	LOC552079	155	-24.77	552079	homeobox protein homothorax
ame-miR-3730-5p	LOC552079	154	-27.22	552079	homeobox protein homothorax
ame-miR-3730-5p	LOC552079	153	-22.52	552079	homeobox protein homothorax
ame-miR-3730-5p	LOC552079	152	-25.58	552079	homeobox protein homothorax
ame-miR-3730-5p	LOC552079	152	-25.58	552079	homeobox protein homothorax
ame-miR-3730-5p	LOC552079	151	-22.42	552079	homeobox protein homothorax
ame-miR-3730-5p	LOC552079	151	-22.14	552079	homeobox protein homothorax
ame-miR-3730-5p	LOC552079	151	-23.95	552079	homeobox protein homothorax
ame-miR-3730-5p	LOC552079	149	-20.08	552079	homeobox protein homothorax
ame-miR-3730-5p	LOC552079	149	-25.7	552079	homeobox protein homothorax
ame-miR-3730-5p	LOC552079	149	-20.83	552079	homeobox protein homothorax
ame-miR-3730-5p	LOC552079	149	-21.99	552079	homeobox protein homothorax
ame-miR-3730-5p	LOC552079	148	-20.61	552079	homeobox protein homothorax
ame-miR-3730-5p	LOC552079	148	-23.21	552079	homeobox protein homothorax
ame-miR-3730-5p	LOC552079	148	-23	552079	homeobox protein homothorax
ame-miR-3730-5p	LOC552079	148	-26.58	552079	homeobox protein homothorax
ame-miR-3730-5p	LOC552079	147	-20.11	552079	homeobox protein homothorax
ame-miR-3730-5p	LOC552079	147	-20.36	552079	homeobox protein homothorax
ame-miR-3730-5p	LOC552079	147	-20.11	552079	homeobox protein homothorax
[truncated: 1,555 more rows]

## Sheet: ame-mir-3730_targetscan
miRNA_family_ID	gene_symbol	Site_type	gene_id	gene_desc
ame-miR-3730-5p	arm	7mer-1a	408399	armadillo segment polarity protein
ame-miR-3730-5p	arm	6mer	408399	armadillo segment polarity protein
ame-miR-3730-5p	arm	7mer-1a	408399	armadillo segment polarity protein
ame-miR-3730-5p	arm	6mer	408399	armadillo segment polarity protein
ame-miR-3730-5p	arm	7mer-1a	408399	armadillo segment polarity protein
ame-miR-3730-5p	arm	6mer	408399	armadillo segment polarity protein
ame-miR-3730-5p	arm	7mer-1a	408399	armadillo segment polarity protein
ame-miR-3730-5p	arm	6mer	408399	armadillo segment polarity protein
ame-miR-3730-5p	LOC408890	6mer	408890	protein groucho
ame-miR-3730-5p	LOC408890	6mer	408890	protein groucho
ame-miR-3730-5p	LOC408890	6mer	408890	protein groucho
ame-miR-3730-5p	LOC408890	6mer	408890	protein groucho
ame-miR-3730-5p	LOC408890	6mer	408890	protein groucho
ame-miR-3730-5p	LOC408894	6mer	408894	transducin-like enhancer protein 3
ame-miR-3730-5p	LOC408894	6mer	408894	transducin-like enhancer protein 3
ame-miR-3730-5p	LOC408894	6mer	408894	transducin-like enhancer protein 3
ame-miR-3730-5p	LOC408894	6mer	408894	transducin-like enhancer protein 3
ame-miR-3730-5p	LOC408894	6mer	408894	transducin-like enhancer protein 3
ame-miR-3730-5p	LOC408894	6mer	408894	transducin-like enhancer protein 3
ame-miR-3730-5p	LOC408894	6mer	408894	transducin-like enhancer protein 3
ame-miR-3730-5p	LOC408894	6mer	408894	transducin-like enhancer protein 3
ame-miR-3730-5p	LOC408894	6mer	408894	transducin-like enhancer protein 3
ame-miR-3730-5p	LOC408894	6mer	408894	transducin-like enhancer protein 3
ame-miR-3730-5p	LOC408894	6mer	408894	transducin-like enhancer protein 3
ame-miR-3730-5p	LOC408894	6mer	408894	transducin-like enhancer protein 3
ame-miR-3730-5p	LOC408894	6mer	408894	transducin-like enhancer protein 3
ame-miR-3730-5p	LOC408894	6mer	408894	transducin-like enhancer protein 3
ame-miR-3730-5p	LOC408894	6mer	408894	transducin-like enhancer protein 3
ame-miR-3730-5p	LOC408894	6mer	408894	transducin-like enhancer protein 3
ame-miR-3730-5p	LOC408894	6mer	408894	transducin-like enhancer protein 3
ame-miR-3730-5p	LOC408894	6mer	408894	transducin-like enhancer protein 3
ame-miR-3730-5p	LOC408894	6mer	408894	transducin-like enhancer protein 3
ame-miR-3730-5p	LOC408894	6mer	408894	transducin-like enhancer protein 3
ame-miR-3730-5p	LOC408894	6mer	408894	transducin-like enhancer protein 3
ame-miR-3730-5p	LOC408894	6mer	408894	transducin-like enhancer protein 3
ame-miR-3730-5p	LOC408894	6mer	408894	transducin-like enhancer protein 3
ame-miR-3730-5p	LOC408894	6mer	408894	transducin-like enhancer protein 3
ame-miR-3730-5p	LOC408894	6mer	408894	transducin-like enhancer protein 3
ame-miR-3730-5p	LOC408894	6mer	408894	transducin-like enhancer protein 3
ame-miR-3730-5p	LOC408894	6mer	408894	transducin-like enhancer protein 3
ame-miR-3730-5p	LOC408894	6mer	408894	transducin-like enhancer protein 3
ame-miR-3730-5p	LOC408894	6mer	408894	transducin-like enhancer protein 3
ame-miR-3730-5p	LOC408894	6mer	408894	transducin-like enhancer protein 3
ame-miR-3730-5p	LOC408894	6mer	408894	transducin-like enhancer protein 3
ame-miR-3730-5p	LOC408894	6mer	408894	transducin-like enhancer protein 3
ame-miR-3730-5p	LOC408894	6mer	408894	transducin-like enhancer protein 3
ame-miR-3730-5p	LOC408894	6mer	408894	transducin-like enhancer protein 3
ame-miR-3730-5p	LOC408894	6mer	408894	transducin-like enhancer protein 3
ame-miR-3730-5p	LOC408894	6mer	408894	transducin-like enhancer protein 3
ame-miR-3730-5p	LOC408894	6mer	408894	transducin-like enhancer protein 3
ame-miR-3730-5p	LOC408996	7mer-1a	408996	1-phosphatidylinositol 4,5-bisphosphate phosphodiesterase
ame-miR-3730-5p	LOC408996	7mer-1a	408996	1-phosphatidylinositol 4,5-bisphosphate phosphodiesterase
ame-miR-3730-5p	LOC408996	7mer-1a	408996	1-phosphatidylinositol 4,5-bisphosphate phosphodiesterase
ame-miR-3730-5p	LOC408996	7mer-1a	408996	1-phosphatidylinositol 4,5-bisphosphate phosphodiesterase
ame-miR-3730-5p	LOC408996	7mer-1a	408996	1-phosphatidylinositol 4,5-bisphosphate phosphodiesterase
ame-miR-3730-5p	LOC408996	7mer-1a	408996	1-phosphatidylinositol 4,5-bisphosphate phosphodiesterase
ame-miR-3730-5p	LOC409001	8mer-1a	409001	disheveled-associated activator of morphogenesis 1
ame-miR-3730-5p	LOC409001	7mer-1a	409001	disheveled-associated activator of morphogenesis 1
ame-miR-3730-5p	LOC409001	8mer-1a	409001	disheveled-associated activator of morphogenesis 1
ame-miR-3730-5p	LOC409001	7mer-1a	409001	disheveled-associated activator of morphogenesis 1
ame-miR-3730-5p	LOC409001	8mer-1a	409001	disheveled-associated activator of morphogenesis 1
ame-miR-3730-5p	LOC409001	7mer-1a	409001	disheveled-associated activator of morphogenesis 1
ame-miR-3730-5p	LOC409001	8mer-1a	409001	disheveled-associated activator of morphogenesis 1
ame-miR-3730-5p	LOC409001	7mer-1a	409001	disheveled-associated activator of morphogenesis 1
ame-miR-3730-5p	LOC409158	6mer	409158	C-terminal-binding protein
ame-miR-3730-5p	LOC409158	8mer-1a	409158	C-terminal-binding protein
ame-miR-3730-5p	LOC409158	6mer	409158	C-terminal-binding protein
ame-miR-3730-5p	LOC409158	8mer-1a	409158	C-terminal-binding protein
ame-miR-3730-5p	LOC409158	6mer	409158	C-terminal-binding protein
ame-miR-3730-5p	LOC409158	8mer-1a	409158	C-terminal-binding protein
ame-miR-3730-5p	LOC409158	6mer	409158	C-terminal-binding protein
ame-miR-3730-5p	LOC409158	8mer-1a	409158	C-terminal-binding protein
ame-miR-3730-5p	LOC409158	6mer	409158	C-terminal-binding protein
ame-miR-3730-5p	LOC409158	8mer-1a	409158	C-terminal-binding protein
ame-miR-3730-5p	LOC409158	6mer	409158	C-terminal-binding protein
ame-miR-3730-5p	LOC409158	6mer	409158	C-terminal-binding protein
ame-miR-3730-5p	LOC409158	6mer	409158	C-terminal-binding protein
ame-miR-3730-5p	LOC409158	8mer-1a	409158	C-terminal-binding protein
ame-miR-3730-5p	LOC409286	6mer	409286	stress-activated protein kinase JNK
ame-miR-3730-5p	LOC409767	6mer	409767	casein kinase II subunit alpha
ame-miR-3730-5p	LOC409767	6mer	409767	casein kinase II subunit alpha
ame-miR-3730-5p	LOC409767	6mer	409767	casein kinase II subunit alpha
ame-miR-3730-5p	LOC409791	8mer-1a	409791	cAMP-dependent protein kinase catalytic subunit
ame-miR-3730-5p	LOC409791	7mer-m8	409791	cAMP-dependent protein kinase catalytic subunit
ame-miR-3730-5p	LOC410724	7mer-1a	410724	protein prickle
ame-miR-3730-5p	LOC410724	6mer	410724	protein prickle
ame-miR-3730-5p	LOC410956	8mer-1a	410956	serine/threonine-protein kinase NLK
ame-miR-3730-5p	LOC410956	6mer	410956	serine/threonine-protein kinase NLK
ame-miR-3730-5p	LOC410956	7mer-1a	410956	serine/threonine-protein kinase NLK
ame-miR-3730-5p	LOC410956	7mer-1a	410956	serine/threonine-protein kinase NLK
ame-miR-3730-5p	LOC410956	8mer-1a	410956	serine/threonine-protein kinase NLK
ame-miR-3730-5p	LOC410956	8mer-1a	410956	serine/threonine-protein kinase NLK
ame-miR-3730-5p	LOC410956	7mer-1a	410956	serine/threonine-protein kinase NLK
ame-miR-3730-5p	LOC410956	8mer-1a	410956	serine/threonine-protein kinase NLK
ame-miR-3730-5p	LOC410956	6mer	410956	serine/threonine-protein kinase NLK
ame-miR-3730-5p	LOC410956	6mer	410956	serine/threonine-protein kinase NLK
ame-miR-3730-5p	LOC410956	7mer-1a	410956	serine/threonine-protein kinase NLK
ame-miR-3730-5p	LOC410956	6mer	410956	serine/threonine-protein kinase NLK
ame-miR-3730-5p	LOC410956	7mer-1a	410956	serine/threonine-protein kinase NLK
ame-miR-3730-5p	LOC410956	8mer-1a	410956	serine/threonine-protein kinase NLK
ame-miR-3730-5p	LOC410956	8mer-1a	410956	serine/threonine-protein kinase NLK
ame-miR-3730-5p	LOC410956	6mer	410956	serine/threonine-protein kinase NLK
ame-miR-3730-5p	LOC410956	7mer-1a	410956	serine/threonine-protein kinase NLK
ame-miR-3730-5p	LOC410956	7mer-1a	410956	serine/threonine-protein kinase NLK
ame-miR-3730-5p	LOC410956	8mer-1a	410956	serine/threonine-protein kinase NLK
ame-miR-3730-5p	LOC410956	6mer	410956	serine/threonine-protein kinase NLK
ame-miR-3730-5p	LOC410956	7mer-1a	410956	serine/threonine-protein kinase NLK
ame-miR-3730-5p	LOC410956	7mer-1a	410956	serine/threonine-protein kinase NLK
ame-miR-3730-5p	LOC410956	8mer-1a	410956	serine/threonine-protein kinase NLK
ame-miR-3730-5p	LOC410956	6mer	410956	serine/threonine-protein kinase NLK
ame-miR-3730-5p	LOC410956	6mer	410956	serine/threonine-protein kinase NLK
ame-miR-3730-5p	LOC410956	7mer-1a	410956	serine/threonine-protein kinase NLK
ame-miR-3730-5p	LOC411046	6mer	411046	serine/threonine-protein phosphatase 2B catalytic subunit 2
ame-miR-3730-5p	LOC411046	6mer	411046	serine/threonine-protein phosphatase 2B catalytic subunit 2
ame-miR-3730-5p	LOC411046	6mer	411046	serine/threonine-protein phosphatase 2B catalytic subunit 2
ame-miR-3730-5p	LOC411046	6mer	411046	serine/threonine-protein phosphatase 2B catalytic subunit 2
ame-miR-3730-5p	LOC411046	6mer	411046	serine/threonine-protein phosphatase 2B catalytic subunit 2
ame-miR-3730-5p	LOC411046	6mer	411046	serine/threonine-protein phosphatase 2B catalytic subunit 2
ame-miR-3730-5p	LOC411046	6mer	411046	serine/threonine-protein phosphatase 2B catalytic subunit 2
ame-miR-3730-5p	LOC411046	6mer	411046	serine/threonine-protein phosphatase 2B catalytic subunit 2
ame-miR-3730-5p	LOC411046	6mer	411046	serine/threonine-protein phosphatase 2B catalytic subunit 2
ame-miR-3730-5p	LOC411046	6mer	411046	serine/threonine-protein phosphatase 2B catalytic subunit 2
ame-miR-3730-5p	LOC411046	6mer	411046	serine/threonine-protein phosphatase 2B catalytic subunit 2
ame-miR-3730-5p	LOC411046	6mer	411046	serine/threonine-protein phosphatase 2B catalytic subunit 2
ame-miR-3730-5p	LOC411046	6mer	411046	serine/threonine-protein phosphatase 2B catalytic subunit 2
ame-miR-3730-5p	LOC411046	6mer	411046	serine/threonine-protein phosphatase 2B catalytic subunit 2
ame-miR-3730-5p	LOC411046	6mer	411046	serine/threonine-protein phosphatase 2B catalytic subunit 2
ame-miR-3730-5p	LOC411046	6mer	411046	serine/threonine-protein phosphatase 2B catalytic subunit 2
ame-miR-3730-5p	LOC411046	6mer	411046	serine/threonine-protein phosphatase 2B catalytic subunit 2
ame-miR-3730-5p	LOC411046	6mer	411046	serine/threonine-protein phosphatase 2B catalytic subunit 2
ame-miR-3730-5p	LOC411046	6mer	411046	serine/threonine-protein phosphatase 2B catalytic subunit 2
ame-miR-3730-5p	LOC411046	6mer	411046	serine/threonine-protein phosphatase 2B catalytic subunit 2
ame-miR-3730-5p	LOC411046	6mer	411046	serine/threonine-protein phosphatase 2B catalytic subunit 2
ame-miR-3730-5p	LOC411046	6mer	411046	serine/threonine-protein phosphatase 2B catalytic subunit 2
ame-miR-3730-5p	LOC411046	7mer-m8	411046	serine/threonine-protein phosphatase 2B catalytic subunit 2
ame-miR-3730-5p	LOC411175	7mer-1a	411175	protein groucho
ame-miR-3730-5p	LOC411175	7mer-m8	411175	protein groucho
ame-miR-3730-5p	LOC411175	7mer-m8	411175	protein groucho
ame-miR-3730-5p	LOC411175	7mer-m8	411175	protein groucho
ame-miR-3730-5p	LOC411175	7mer-1a	411175	protein groucho
ame-miR-3730-5p	LOC411175	6mer	411175	protein groucho
ame-miR-3730-5p	LOC411175	7mer-m8	411175	protein groucho
ame-miR-3730-5p	LOC412108	6mer	412108	casein kinase I
ame-miR-3730-5p	LOC412108	6mer	412108	casein kinase I
ame-miR-3730-5p	LOC412108	6mer	412108	casein kinase I
ame-miR-3730-5p	LOC412108	8mer-1a	412108	casein kinase I
ame-miR-3730-5p	LOC412108	6mer	412108	casein kinase I
ame-miR-3730-5p	LOC412108	6mer	412108	casein kinase I
ame-miR-3730-5p	LOC412108	6mer	412108	casein kinase I
ame-miR-3730-5p	LOC412108	6mer	412108	casein kinase I
ame-miR-3730-5p	LOC413169	6mer	413169	presenilin-1
ame-miR-3730-5p	LOC413169	6mer	413169	presenilin-1
ame-miR-3730-5p	LOC413169	6mer	413169	presenilin-1
ame-miR-3730-5p	LOC413169	6mer	413169	presenilin-1
ame-miR-3730-5p	LOC413169	6mer	413169	presenilin-1
ame-miR-3730-5p	LOC413169	6mer	413169	presenilin-1
ame-miR-3730-5p	LOC413169	6mer	413169	presenilin-1
ame-miR-3730-5p	LOC413169	6mer	413169	presenilin-1
ame-miR-3730-5p	LOC413169	6mer	413169	presenilin-1
ame-miR-3730-5p	LOC413169	6mer	413169	presenilin-1
ame-miR-3730-5p	LOC413169	6mer	413169	presenilin-1
ame-miR-3730-5p	LOC413169	6mer	413169	presenilin-1
ame-miR-3730-5p	LOC413169	6mer	413169	presenilin-1
ame-miR-3730-5p	LOC413169	6mer	413169	presenilin-1
ame-miR-3730-5p	LOC413169	6mer	413169	presenilin-1
ame-miR-3730-5p	LOC413500	6mer	413500	protein Wnt-10b
ame-miR-3730-5p	LOC413502	6mer	413502	protein Wnt-1
ame-miR-3730-5p	LOC413502	6mer	413502	protein Wnt-1
ame-miR-3730-5p	LOC414037	6mer	414037	protein Wnt-5b
ame-miR-3730-5p	LOC414037	6mer	414037	protein Wnt-5b
ame-miR-3730-5p	LOC414037	6mer	414037	protein Wnt-5b
ame-miR-3730-5p	LOC414037	6mer	414037	protein Wnt-5b
ame-miR-3730-5p	LOC414037	6mer	414037	protein Wnt-5b
ame-miR-3730-5p	LOC414037	6mer	414037	protein Wnt-5b
ame-miR-3730-5p	LOC414037	6mer	414037	protein Wnt-5b
ame-miR-3730-5p	LOC414037	6mer	414037	protein Wnt-5b
ame-miR-3730-5p	LOC551313	7mer-m8	551313	calcineurin subunit B type 2
ame-miR-3730-5p	Camkii	6mer	551691	calcium/calmodulin-dependent protein kinase II
ame-miR-3730-5p	Camkii	6mer	551691	calcium/calmodulin-dependent protein kinase II
ame-miR-3730-5p	Camkii	6mer	551691	calcium/calmodulin-dependent protein kinase II
ame-miR-3730-5p	Camkii	6mer	551691	calcium/calmodulin-dependent protein kinase II
ame-miR-3730-5p	Camkii	6mer	551691	calcium/calmodulin-dependent protein kinase II
ame-miR-3730-5p	Camkii	6mer	551691	calcium/calmodulin-dependent protein kinase II
ame-miR-3730-5p	Camkii	6mer	551691	calcium/calmodulin-dependent protein kinase II
ame-miR-3730-5p	Camkii	6mer	551691	calcium/calmodulin-dependent protein kinase II
ame-miR-3730-5p	Camkii	6mer	551691	calcium/calmodulin-dependent protein kinase II
ame-miR-3730-5p	Camkii	6mer	551691	calcium/calmodulin-dependent protein kinase II
ame-miR-3730-5p	Camkii	6mer	551691	calcium/calmodulin-dependent protein kinase II
ame-miR-3730-5p	Camkii	6mer	551691	calcium/calmodulin-dependent protein kinase II
ame-miR-3730-5p	Camkii	6mer	551691	calcium/calmodulin-dependent protein kinase II
ame-miR-3730-5p	Camkii	6mer	551691	calcium/calmodulin-dependent protein kinase II
ame-miR-3730-5p	Camkii	6mer	551691	calcium/calmodulin-dependent protein kinase II
ame-miR-3730-5p	Camkii	6mer	551691	calcium/calmodulin-dependent protein kinase II
ame-miR-3730-5p	Camkii	6mer	551691	calcium/calmodulin-dependent protein kinase II
ame-miR-3730-5p	Camkii	6mer	551691	calcium/calmodulin-dependent protein kinase II
ame-miR-3730-5p	Camkii	6mer	551691	calcium/calmodulin-dependent protein kinase II
ame-miR-3730-5p	Camkii	6mer	551691	calcium/calmodulin-dependent protein kinase II
ame-miR-3730-5p	Camkii	6mer	551691	calcium/calmodulin-dependent protein kinase II
ame-miR-3730-5p	Camkii	6mer	551691	calcium/calmodulin-dependent protein kinase II
ame-miR-3730-5p	Camkii	6mer	551691	calcium/calmodulin-dependent protein kinase II
ame-miR-3730-5p	Camkii	6mer	551691	calcium/calmodulin-dependent protein kinase II
ame-miR-3730-5p	Camkii	6mer	551691	calcium/calmodulin-dependent protein kinase II
ame-miR-3730-5p	Camkii	6mer	551691	calcium/calmodulin-dependent protein kinase II
ame-miR-3730-5p	Camkii	6mer	551691	calcium/calmodulin-dependent protein kinase II
ame-miR-3730-5p	Camkii	6mer	551691	calcium/calmodulin-dependent protein kinase II
ame-miR-3730-5p	Camkii	6mer	551691	calcium/calmodulin-dependent protein kinase II
ame-miR-3730-5p	Camkii	6mer	551691	calcium/calmodulin-dependent protein kinase II
ame-miR-3730-5p	Camkii	6mer	551691	calcium/calmodulin-dependent protein kinase II
ame-miR-3730-5p	Camkii	6mer	551691	calcium/calmodulin-dependent protein kinase II
ame-miR-3730-5p	Camkii	6mer	551691	calcium/calmodulin-dependent protein kinase II
ame-miR-3730-5p	Camkii	6mer	551691	calcium/calmodulin-dependent protein kinase II
ame-miR-3730-5p	Camkii	6mer	551691	calcium/calmodulin-dependent protein kinase II
ame-miR-3730-5p	Camkii	6mer	551691	calcium/calmodulin-dependent protein kinase II
ame-miR-3730-5p	Camkii	6mer	551691	calcium/calmodulin-dependent protein kinase II
ame-miR-3730-5p	Camkii	6mer	551691	calcium/calmodulin-dependent protein kinase II
ame-miR-3730-5p	Camkii	6mer	551691	calcium/calmodulin-dependent protein kinase II
ame-miR-3730-5p	Camkii	6mer	551691	calcium/calmodulin-dependent protein kinase II
ame-miR-3730-5p	Camkii	6mer	551691	calcium/calmodulin-dependent protein kinase II
ame-miR-3730-5p	Camkii	6mer	551691	calcium/calmodulin-dependent protein kinase II
ame-miR-3730-5p	Camkii	6mer	551691	calcium/calmodulin-dependent protein kinase II
ame-miR-3730-5p	Camkii	6mer	551691	calcium/calmodulin-dependent protein kinase II
ame-miR-3730-5p	Camkii	6mer	551691	calcium/calmodulin-dependent protein kinase II
ame-miR-3730-5p	Camkii	6mer	551691	calcium/calmodulin-dependent protein kinase II
ame-miR-3730-5p	Camkii	6mer	551691	calcium/calmodulin-dependent protein kinase II
ame-miR-3730-5p	Camkii	6mer	551691	calcium/calmodulin-dependent protein kinase II
ame-miR-3730-5p	Camkii	6mer	551691	calcium/calmodulin-dependent protein kinase II
ame-miR-3730-5p	Camkii	6mer	551691	calcium/calmodulin-dependent protein kinase II
ame-miR-3730-5p	Camkii	6mer	551691	calcium/calmodulin-dependent protein kinase II
ame-miR-3730-5p	Camkii	6mer	551691	calcium/calmodulin-dependent protein kinase II
ame-miR-3730-5p	Camkii	6mer	551691	calcium/calmodulin-dependent protein kinase II
ame-miR-3730-5p	Camkii	6mer	551691	calcium/calmodulin-dependent protein kinase II
ame-miR-3730-5p	Camkii	6mer	551691	calcium/calmodulin-dependent protein kinase II
ame-miR-3730-5p	Camkii	6mer	551691	calcium/calmodulin-dependent protein kinase II
ame-miR-3730-5p	Camkii	6mer	551691	calcium/calmodulin-dependent protein kinase II
ame-miR-3730-5p	Camkii	6mer	551691	calcium/calmodulin-dependent protein kinase II
ame-miR-3730-5p	Camkii	6mer	551691	calcium/calmodulin-dependent protein kinase II
ame-miR-3730-5p	Camkii	6mer	551691	calcium/calmodulin-dependent protein kinase II
ame-miR-3730-5p	Camkii	6mer	551691	calcium/calmodulin-dependent protein kinase II
ame-miR-3730-5p	Camkii	6mer	551691	calcium/calmodulin-dependent protein kinase II
ame-miR-3730-5p	Camkii	6mer	551691	calcium/calmodulin-dependent protein kinase II
ame-miR-3730-5p	Camkii	6mer	551691	calcium/calmodulin-dependent protein kinase II
ame-miR-3730-5p	Camkii	6mer	551691	calcium/calmodulin-dependent protein kinase II
ame-miR-3730-5p	Camkii	6mer	551691	calcium/calmodulin-dependent protein kinase II
ame-miR-3730-5p	Camkii	6mer	551691	calcium/calmodulin-dependent protein kinase II
ame-miR-3730-5p	Camkii	6mer	551691	calcium/calmodulin-dependent protein kinase II
ame-miR-3730-5p	Camkii	6mer	551691	calcium/calmodulin-dependent protein kinase II
ame-miR-3730-5p	Camkii	6mer	551691	calcium/calmodulin-dependent protein kinase II
ame-miR-3730-5p	Camkii	6mer	551691	calcium/calmodulin-dependent protein kinase II
ame-miR-3730-5p	Camkii	6mer	551691	calcium/calmodulin-dependent protein kinase II
ame-miR-3730-5p	Camkii	6mer	551691	calcium/calmodulin-dependent protein kinase II
ame-miR-3730-5p	Camkii	6mer	551691	calcium/calmodulin-dependent protein kinase II
ame-miR-3730-5p	Camkii	6mer	551691	calcium/calmodulin-dependent protein kinase II
ame-miR-3730-5p	Camkii	6mer	551691	calcium/calmodulin-dependent protein kinase II
ame-miR-3730-5p	Camkii	6mer	551691	calcium/calmodulin-dependent protein kinase II
ame-miR-3730-5p	Camkii	6mer	551691	calcium/calmodulin-dependent protein kinase II
ame-miR-3730-5p	Camkii	6mer	551691	calcium/calmodulin-dependent protein kinase II
ame-miR-3730-5p	Camkii	6mer	551691	calcium/calmodulin-dependent protein kinase II
ame-miR-3730-5p	Camkii	6mer	551691	calcium/calmodulin-dependent protein kinase II
ame-miR-3730-5p	Camkii	6mer	551691	calcium/calmodulin-dependent protein kinase II
ame-miR-3730-5p	Camkii	6mer	551691	calcium/calmodulin-dependent protein kinase II
ame-miR-3730-5p	Camkii	6mer	551691	calcium/calmodulin-dependent protein kinase II
ame-miR-3730-5p	Camkii	6mer	551691	calcium/calmodulin-dependent protein kinase II
ame-miR-3730-5p	Camkii	6mer	551691	calcium/calmodulin-dependent protein kinase II
ame-miR-3730-5p	Camkii	6mer	551691	calcium/calmodulin-dependent protein kinase II
ame-miR-3730-5p	Camkii	6mer	551691	calcium/calmodulin-dependent protein kinase II
ame-miR-3730-5p	Camkii	6mer	551691	calcium/calmodulin-dependent protein kinase II
ame-miR-3730-5p	Camkii	6mer	551691	calcium/calmodulin-dependent protein kinase II
ame-miR-3730-5p	Camkii	6mer	551691	calcium/calmodulin-dependent protein kinase II
ame-miR-3730-5p	Camkii	6mer	551691	calcium/calmodulin-dependent protein kinase II
ame-miR-3730-5p	Camkii	6mer	551691	calcium/calmodulin-dependent protein kinase II
ame-miR-3730-5p	Camkii	6mer	551691	calcium/calmodulin-dependent protein kinase II
ame-miR-3730-5p	Camkii	6mer	551691	calcium/calmodulin-dependent protein kinase II
ame-miR-3730-5p	Camkii	6mer	551691	calcium/calmodulin-dependent protein kinase II
ame-miR-3730-5p	Camkii	6mer	551691	calcium/calmodulin-dependent protein kinase II
ame-miR-3730-5p	Camkii	6mer	551691	calcium/calmodulin-dependent protein kinase II
ame-miR-3730-5p	Camkii	6mer	551691	calcium/calmodulin-dependent protein kinase II
ame-miR-3730-5p	Camkii	6mer	551691	calcium/calmodulin-dependent protein kinase II
ame-miR-3730-5p	Camkii	6mer	551691	calcium/calmodulin-dependent protein kinase II
ame-miR-3730-5p	Camkii	6mer	551691	calcium/calmodulin-dependent protein kinase II
ame-miR-3730-5p	Camkii	6mer	551691	calcium/calmodulin-dependent protein kinase II
ame-miR-3730-5p	Camkii	6mer	551691	calcium/calmodulin-dependent protein kinase II
ame-miR-3730-5p	Camkii	6mer	551691	calcium/calmodulin-dependent protein kinase II
ame-miR-3730-5p	Camkii	6mer	551691	calcium/calmodulin-dependent protein kinase II
ame-miR-3730-5p	Camkii	6mer	551691	calcium/calmodulin-dependent protein kinase II
ame-miR-3730-5p	Camkii	6mer	551691	calcium/calmodulin-dependent protein kinase II
ame-miR-3730-5p	Camkii	6mer	551691	calcium/calmodulin-dependent protein kinase II
ame-miR-3730-5p	Camkii	6mer	551691	calcium/calmodulin-dependent protein kinase II
ame-miR-3730-5p	Camkii	6mer	551691	calcium/calmodulin-dependent protein kinase II
ame-miR-3730-5p	Camkii	6mer	551691	calcium/calmodulin-dependent protein kinase II
ame-miR-3730-5p	Camkii	6mer	551691	calcium/calmodulin-dependent protein kinase II
ame-miR-3730-5p	Camkii	6mer	551691	calcium/calmodulin-dependent protein kinase II
ame-miR-3730-5p	Camkii	6mer	551691	calcium/calmodulin-dependent protein kinase II
ame-miR-3730-5p	Camkii	6mer	551691	calcium/calmodulin-dependent protein kinase II
ame-miR-3730-5p	Camkii	6mer	551691	calcium/calmodulin-dependent protein kinase II
ame-miR-3730-5p	Camkii	6mer	551691	calcium/calmodulin-dependent protein kinase II
ame-miR-3730-5p	Camkii	6mer	551691	calcium/calmodulin-dependent protein kinase II
ame-miR-3730-5p	Camkii	6mer	551691	calcium/calmodulin-dependent protein kinase II
ame-miR-3730-5p	Camkii	6mer	551691	calcium/calmodulin-dependent protein kinase II
ame-miR-3730-5p	Camkii	6mer	551691	calcium/calmodulin-dependent protein kinase II
ame-miR-3730-5p	Camkii	6mer	551691	calcium/calmodulin-dependent protein kinase II
ame-miR-3730-5p	Camkii	6mer	551691	calcium/calmodulin-dependent protein kinase II
ame-miR-3730-5p	Camkii	6mer	551691	calcium/calmodulin-dependent protein kinase II
ame-miR-3730-5p	Camkii	6mer	551691	calcium/calmodulin-dependent protein kinase II
ame-miR-3730-5p	Camkii	6mer	551691	calcium/calmodulin-dependent protein kinase II
ame-miR-3730-5p	Camkii	6mer	551691	calcium/calmodulin-dependent protein kinase II
ame-miR-3730-5p	Camkii	6mer	551691	calcium/calmodulin-dependent protein kinase II
ame-miR-3730-5p	Camkii	6mer	551691	calcium/calmodulin-dependent protein kinase II
ame-miR-3730-5p	Camkii	6mer	551691	calcium/calmodulin-dependent protein kinase II
ame-miR-3730-5p	Camkii	6mer	551691	calcium/calmodulin-dependent protein kinase II
ame-miR-3730-5p	Camkii	6mer	551691	calcium/calmodulin-dependent protein kinase II
ame-miR-3730-5p	Camkii	6mer	551691	calcium/calmodulin-dependent protein kinase II
ame-miR-3730-5p	Camkii	6mer	551691	calcium/calmodulin-dependent protein kinase II
ame-miR-3730-5p	Camkii	6mer	551691	calcium/calmodulin-dependent protein kinase II
ame-miR-3730-5p	Camkii	6mer	551691	calcium/calmodulin-dependent protein kinase II
ame-miR-3730-5p	Camkii	6mer	551691	calcium/calmodulin-dependent protein kinase II
ame-miR-3730-5p	Camkii	6mer	551691	calcium/calmodulin-dependent protein kinase II
ame-miR-3730-5p	Camkii	6mer	551691	calcium/calmodulin-dependent protein kinase II
ame-miR-3730-5p	Camkii	6mer	551691	calcium/calmodulin-dependent protein kinase II
ame-miR-3730-5p	Camkii	6mer	551691	calcium/calmodulin-dependent protein kinase II
ame-miR-3730-5p	Camkii	6mer	551691	calcium/calmodulin-dependent protein kinase II
ame-miR-3730-5p	Camkii	6mer	551691	calcium/calmodulin-dependent protein kinase II
ame-miR-3730-5p	Camkii	6mer	551691	calcium/calmodulin-dependent protein kinase II
ame-miR-3730-5p	Camkii	6mer	551691	calcium/calmodulin-dependent protein kinase II
ame-miR-3730-5p	Camkii	6mer	551691	calcium/calmodulin-dependent protein kinase II
ame-miR-3730-5p	Camkii	6mer	551691	calcium/calmodulin-dependent protein kinase II
ame-miR-3730-5p	Camkii	6mer	551691	calcium/calmodulin-dependent protein kinase II
ame-miR-3730-5p	Camkii	6mer	551691	calcium/calmodulin-dependent protein kinase II
ame-miR-3730-5p	Camkii	6mer	551691	calcium/calmodulin-dependent protein kinase II
ame-miR-3730-5p	Camkii	6mer	551691	calcium/calmodulin-dependent protein kinase II
ame-miR-3730-5p	Camkii	6mer	551691	calcium/calmodulin-dependent protein kinase II
ame-miR-3730-5p	Camkii	6mer	551691	calcium/calmodulin-dependent protein kinase II
ame-miR-3730-5p	Camkii	6mer	551691	calcium/calmodulin-dependent protein kinase II
ame-miR-3730-5p	Camkii	6mer	551691	calcium/calmodulin-dependent protein kinase II
ame-miR-3730-5p	Camkii	6mer	551691	calcium/calmodulin-dependent protein kinase II
ame-miR-3730-5p	Camkii	6mer	551691	calcium/calmodulin-dependent protein kinase II
ame-miR-3730-5p	Camkii	6mer	551691	calcium/calmodulin-dependent protein kinase II
ame-miR-3730-5p	Camkii	6mer	551691	calcium/calmodulin-dependent protein kinase II
ame-miR-3730-5p	Camkii	6mer	551691	calcium/calmodulin-dependent protein kinase II
ame-miR-3730-5p	Camkii	6mer	551691	calcium/calmodulin-dependent protein kinase II
ame-miR-3730-5p	Camkii	6mer	551691	calcium/calmodulin-dependent protein kinase II
ame-miR-3730-5p	Camkii	6mer	551691	calcium/calmodulin-dependent protein kinase II
ame-miR-3730-5p	Camkii	6mer	551691	calcium/calmodulin-dependent protein kinase II
ame-miR-3730-5p	Camkii	6mer	551691	calcium/calmodulin-dependent protein kinase II
ame-miR-3730-5p	Camkii	6mer	551691	calcium/calmodulin-dependent protein kinase II
ame-miR-3730-5p	Camkii	6mer	551691	calcium/calmodulin-dependent protein kinase II
ame-miR-3730-5p	Camkii	6mer	551691	calcium/calmodulin-dependent protein kinase II
ame-miR-3730-5p	Camkii	6mer	551691	calcium/calmodulin-dependent protein kinase II
ame-miR-3730-5p	Camkii	6mer	551691	calcium/calmodulin-dependent protein kinase II
ame-miR-3730-5p	Camkii	6mer	551691	calcium/calmodulin-dependent protein kinase II
ame-miR-3730-5p	Camkii	6mer	551691	calcium/calmodulin-dependent protein kinase II
ame-miR-3730-5p	Camkii	6mer	551691	calcium/calmodulin-dependent protein kinase II
ame-miR-3730-5p	Camkii	6mer	551691	calcium/calmodulin-dependent protein kinase II
ame-miR-3730-5p	Camkii	6mer	551691	calcium/calmodulin-dependent protein kinase II
ame-miR-3730-5p	Camkii	6mer	551691	calcium/calmodulin-dependent protein kinase II
ame-miR-3730-5p	Camkii	6mer	551691	calcium/calmodulin-dependent protein kinase II
ame-miR-3730-5p	Camkii	6mer	551691	calcium/calmodulin-dependent protein kinase II
ame-miR-3730-5p	Camkii	6mer	551691	calcium/calmodulin-dependent protein kinase II
ame-miR-3730-5p	Camkii	6mer	551691	calcium/calmodulin-dependent protein kinase II
ame-miR-3730-5p	Camkii	6mer	551691	calcium/calmodulin-dependent protein kinase II
ame-miR-3730-5p	Camkii	6mer	551691	calcium/calmodulin-dependent protein kinase II
ame-miR-3730-5p	Camkii	6mer	551691	calcium/calmodulin-dependent protein kinase II
ame-miR-3730-5p	Camkii	6mer	551691	calcium/calmodulin-dependent protein kinase II
ame-miR-3730-5p	Camkii	6mer	551691	calcium/calmodulin-dependent protein kinase II
ame-miR-3730-5p	Camkii	6mer	551691	calcium/calmodulin-dependent protein kinase II
ame-miR-3730-5p	Camkii	6mer	551691	calcium/calmodulin-dependent protein kinase II
ame-miR-3730-5p	Camkii	6mer	551691	calcium/calmodulin-dependent protein kinase II
ame-miR-3730-5p	Camkii	6mer	551691	calcium/calmodulin-dependent protein kinase II
ame-miR-3730-5p	Camkii	6mer	551691	calcium/calmodulin-dependent protein kinase II
ame-miR-3730-5p	Camkii	6mer	551691	calcium/calmodulin-dependent protein kinase II
ame-miR-3730-5p	Camkii	6mer	551691	calcium/calmodulin-dependent protein kinase II
ame-miR-3730-5p	Camkii	6mer	551691	calcium/calmodulin-dependent protein kinase II
ame-miR-3730-5p	Camkii	6mer	551691	calcium/calmodulin-dependent protein kinase II
ame-miR-3730-5p	Camkii	6mer	551691	calcium/calmodulin-dependent protein kinase II
ame-miR-3730-5p	Camkii	6mer	551691	calcium/calmodulin-dependent protein kinase II
ame-miR-3730-5p	Camkii	6mer	551691	calcium/calmodulin-dependent protein kinase II
ame-miR-3730-5p	Camkii	6mer	551691	calcium/calmodulin-dependent protein kinase II
ame-miR-3730-5p	Camkii	6mer	551691	calcium/calmodulin-dependent protein kinase II
ame-miR-3730-5p	Camkii	6mer	551691	calcium/calmodulin-dependent protein kinase II
ame-miR-3730-5p	Camkii	6mer	551691	calcium/calmodulin-dependent protein kinase II
ame-miR-3730-5p	Camkii	6mer	551691	calcium/calmodulin-dependent protein kinase II
ame-miR-3730-5p	Camkii	6mer	551691	calcium/calmodulin-dependent protein kinase II
ame-miR-3730-5p	Camkii	6mer	551691	calcium/calmodulin-dependent protein kinase II
ame-miR-3730-5p	Camkii	6mer	551691	calcium/calmodulin-dependent protein kinase II
ame-miR-3730-5p	Camkii	6mer	551691	calcium/calmodulin-dependent protein kinase II
ame-miR-3730-5p	Camkii	6mer	551691	calcium/calmodulin-dependent protein kinase II
ame-miR-3730-5p	Camkii	6mer	551691	calcium/calmodulin-dependent protein kinase II
ame-miR-3730-5p	Camkii	6mer	551691	calcium/calmodulin-dependent protein kinase II
ame-miR-3730-5p	Camkii	6mer	551691	calcium/calmodulin-dependent protein kinase II
ame-miR-3730-5p	LOC552340	6mer	552340	glypican-4
ame-miR-3730-5p	LOC552340	7mer-1a	552340	glypican-4
ame-miR-3730-5p	LOC552340	7mer-1a	552340	glypican-4
ame-miR-3730-5p	LOC552340	7mer-1a	552340	glypican-4
ame-miR-3730-5p	LOC552340	6mer	552340	glypican-4
ame-miR-3730-5p	LOC552340	7mer-1a	552340	glypican-4
ame-miR-3730-5p	LOC552340	6mer	552340	glypican-4
ame-miR-3730-5p	LOC552340	7mer-1a	552340	glypican-4
ame-miR-3730-5p	LOC552340	7mer-1a	552340	glypican-4
ame-miR-3730-5p	LOC552340	6mer	552340	glypican-4
ame-miR-3730-5p	LOC552374	7mer-m8	552374	protein Wnt-1
ame-miR-3730-5p	LOC552419	6mer	552419	ras-like GTP-binding protein RhoL
ame-miR-3730-5p	LOC552419	6mer	552419	ras-like GTP-binding protein RhoL
ame-miR-3730-5p	LOC552545	6mer	552545	division abnormally delayed protein
ame-miR-3730-5p	LOC552545	7mer-m8	552545	division abnormally delayed protein
ame-miR-3730-5p	LOC552545	7mer-1a	552545	division abnormally delayed protein
ame-miR-3730-5p	LOC552545	7mer-m8	552545	division abnormally delayed protein
ame-miR-3730-5p	LOC724471	7mer-1a	724471	1-phosphatidylinositol 4,5-bisphosphate phosphodiesterase-like
ame-miR-3730-5p	LOC724997	6mer	724997	protein naked cuticle homolog 2-like
ame-miR-3730-5p	LOC726280	6mer	726280	histone acetyltransferase p300-like
ame-miR-3730-5p	LOC726280	6mer	726280	histone acetyltransferase p300-like
ame-miR-3730-5p	LOC726280	7mer-1a	726280	histone acetyltransferase p300-like
ame-miR-3730-5p	LOC726280	6mer	726280	histone acetyltransferase p300-like
ame-miR-3730-5p	LOC726280	7mer-1a	726280	histone acetyltransferase p300-like
ame-miR-3730-5p	LOC726280	6mer	726280	histone acetyltransferase p300-like
ame-miR-3730-5p	LOC726280	6mer	726280	histone acetyltransferase p300-like
ame-miR-3730-5p	LOC726280	6mer	726280	histone acetyltransferase p300-like
ame-miR-3730-5p	LOC726280	7mer-1a	726280	histone acetyltransferase p300-like
ame-miR-3730-5p	LOC726289	6mer	726289	transcription factor AP-1
ame-miR-3730-5p	LOC726671	7mer-m8	726671	uncharacterized LOC726671
ame-miR-3730-5p	LOC726671	6mer	726671	uncharacterized LOC726671
ame-miR-3730-5p	LOC726671	7mer-m8	726671	uncharacterized LOC726671
ame-miR-3730-5p	LOC726671	6mer	726671	uncharacterized LOC726671
ame-miR-3730-5p	LOC726671	7mer-m8	726671	uncharacterized LOC726671
ame-miR-3730-5p	LOC726671	7mer-m8	726671	uncharacterized LOC726671
ame-miR-3730-5p	LOC100576247	6mer	100576247	frizzled 2
ame-miR-3730-5p	LOC100576247	6mer	100576247	frizzled 2
ame-miR-3730-5p	LOC100576247	7mer-m8	100576247	frizzled 2
ame-miR-3730-5p	LOC100576247	6mer	100576247	frizzled 2
ame-miR-3730-5p	LOC100576247	7mer-1a	100576247	frizzled 2
ame-miR-3730-5p	LOC100576247	6mer	100576247	frizzled 2
ame-miR-3730-5p	LOC100576247	6mer	100576247	frizzled 2
ame-miR-3730-5p	LOC100576247	6mer	100576247	frizzled 2
ame-miR-3730-5p	LOC100576247	7mer-1a	100576247	frizzled 2
ame-miR-3730-5p	LOC100576247	6mer	100576247	frizzled 2
ame-miR-3730-5p	LOC100576247	6mer	100576247	frizzled 2
ame-miR-3730-5p	LOC100576247	6mer	100576247	frizzled 2
ame-miR-3730-5p	LOC100576247	6mer	100576247	frizzled 2
ame-miR-3730-5p	LOC100576247	6mer	100576247	frizzled 2
ame-miR-3730-5p	LOC100576247	6mer	100576247	frizzled 2
ame-miR-3730-5p	LOC100576247	6mer	100576247	frizzled 2
ame-miR-3730-5p	LOC100576247	6mer	100576247	frizzled 2
ame-miR-3730-5p	LOC100576247	6mer	100576247	frizzled 2
ame-miR-3730-5p	LOC100576247	6mer	100576247	frizzled 2
ame-miR-3730-5p	LOC100576392	8mer-1a	100576392	transcriptional regulator Myc-B
ame-miR-3730-5p	LOC100576392	6mer	100576392	transcriptional regulator Myc-B
ame-miR-3730-5p	LOC100576392	7mer-1a	100576392	transcriptional regulator Myc-B
ame-miR-3730-5p	LOC100576392	6mer	100576392	transcriptional regulator Myc-B
ame-miR-3730-5p	LOC100576392	7mer-m8	100576392	transcriptional regulator Myc-B
ame-miR-3730-5p	LOC100576392	8mer-1a	100576392	transcriptional regulator Myc-B
ame-miR-3730-5p	LOC100576392	6mer	100576392	transcriptional regulator Myc-B
ame-miR-3730-5p	LOC100576392	7mer-1a	100576392	transcriptional regulator Myc-B
ame-miR-3730-5p	LOC100576392	6mer	100576392	transcriptional regulator Myc-B
ame-miR-3730-5p	LOC100576392	7mer-m8	100576392	transcriptional regulator Myc-B
ame-miR-3730-5p	ROCK2	7mer-1a	100578506	Rho-associated, coiled-coil containing protein kinase 2
ame-miR-3730-5p	ROCK2	7mer-1a	100578506	Rho-associated, coiled-coil containing protein kinase 2
ame-miR-3730-5p	LOC107963993	7mer-1a	107963993	palmitoleoyl-protein carboxylesterase NOTUM
ame-miR-3730-5p	LOC107963993	7mer-1a	107963993	palmitoleoyl-protein carboxylesterase NOTUM
ame-miR-3730-5p	LOC107963993	6mer	107963993	palmitoleoyl-protein carboxylesterase NOTUM
ame-miR-3730-5p	LOC107963993	6mer	107963993	palmitoleoyl-protein carboxylesterase NOTUM
ame-miR-3730-5p	LOC408292	7mer-1a	408292	transcriptional coactivator YAP1
ame-miR-3730-5p	LOC408292	7mer-1a	408292	transcriptional coactivator YAP1
ame-miR-3730-5p	LOC408616	7mer-1a	408616	transcriptional enhancer factor TEF-1
ame-miR-3730-5p	LOC408616	7mer-1a	408616	transcriptional enhancer factor TEF-1
ame-miR-3730-5p	LOC408616	6mer	408616	transcriptional enhancer factor TEF-1
ame-miR-3730-5p	LOC408767	7mer-m8	408767	protein dachsous
ame-miR-3730-5p	LOC408767	6mer	408767	protein dachsous
ame-miR-3730-5p	LOC408767	6mer	408767	protein dachsous
ame-miR-3730-5p	LOC408767	7mer-m8	408767	protein dachsous
ame-miR-3730-5p	LOC408767	6mer	408767	protein dachsous
ame-miR-3730-5p	LOC408767	6mer	408767	protein dachsous
ame-miR-3730-5p	LOC408767	7mer-m8	408767	protein dachsous
ame-miR-3730-5p	LOC408767	6mer	408767	protein dachsous
ame-miR-3730-5p	LOC408767	7mer-m8	408767	protein dachsous
ame-miR-3730-5p	LOC408767	6mer	408767	protein dachsous
ame-miR-3730-5p	LOC408767	6mer	408767	protein dachsous
ame-miR-3730-5p	LOC408767	7mer-m8	408767	protein dachsous
ame-miR-3730-5p	LOC408767	6mer	408767	protein dachsous
ame-miR-3730-5p	LOC408767	7mer-m8	408767	protein dachsous
ame-miR-3730-5p	LOC408951	7mer-1a	408951	14-3-3 protein epsilon
ame-miR-3730-5p	LOC408951	7mer-m8	408951	14-3-3 protein epsilon
ame-miR-3730-5p	LOC409084	7mer-1a	409084	arginine-glutamic acid dipeptide repeats protein
ame-miR-3730-5p	LOC409084	7mer-1a	409084	arginine-glutamic acid dipeptide repeats protein
ame-miR-3730-5p	LOC409084	7mer-1a	409084	arginine-glutamic acid dipeptide repeats protein
ame-miR-3730-5p	LOC409084	7mer-1a	409084	arginine-glutamic acid dipeptide repeats protein
ame-miR-3730-5p	LOC409084	7mer-1a	409084	arginine-glutamic acid dipeptide repeats protein
ame-miR-3730-5p	LOC409084	7mer-1a	409084	arginine-glutamic acid dipeptide repeats protein
ame-miR-3730-5p	LOC409301	7mer-1a	409301	protein mothers against dpp
ame-miR-3730-5p	LOC409301	7mer-1a	409301	protein mothers against dpp
ame-miR-3730-5p	LOC409348	6mer	409348	lethal(2) giant larvae protein homolog 1
ame-miR-3730-5p	LOC409348	6mer	409348	lethal(2) giant larvae protein homolog 1
ame-miR-3730-5p	LOC409348	6mer	409348	lethal(2) giant larvae protein homolog 1
ame-miR-3730-5p	LOC409348	6mer	409348	lethal(2) giant larvae protein homolog 1
ame-miR-3730-5p	LOC409348	6mer	409348	lethal(2) giant larvae protein homolog 1
ame-miR-3730-5p	LOC409348	6mer	409348	lethal(2) giant larvae protein homolog 1
ame-miR-3730-5p	LOC409348	6mer	409348	lethal(2) giant larvae protein homolog 1
ame-miR-3730-5p	LOC409348	6mer	409348	lethal(2) giant larvae protein homolog 1
ame-miR-3730-5p	LOC409898	7mer-1a	409898	protein expanded-like
ame-miR-3730-5p	LOC409898	7mer-m8	409898	protein expanded-like
ame-miR-3730-5p	LOC409904	7mer-m8	409904	uncharacterized LOC409904
ame-miR-3730-5p	LOC409904	7mer-m8	409904	uncharacterized LOC409904
ame-miR-3730-5p	LOC409904	7mer-1a	409904	uncharacterized LOC409904
ame-miR-3730-5p	LOC409904	7mer-1a	409904	uncharacterized LOC409904
ame-miR-3730-5p	LOC409904	7mer-m8	409904	uncharacterized LOC409904
ame-miR-3730-5p	LOC409904	7mer-1a	409904	uncharacterized LOC409904
ame-miR-3730-5p	LOC409904	7mer-1a	409904	uncharacterized LOC409904
ame-miR-3730-5p	LOC409904	7mer-m8	409904	uncharacterized LOC409904
ame-miR-3730-5p	LOC409904	7mer-m8	409904	uncharacterized LOC409904
ame-miR-3730-5p	LOC409904	7mer-1a	409904	uncharacterized LOC409904
ame-miR-3730-5p	LOC409904	7mer-1a	409904	uncharacterized LOC409904
ame-miR-3730-5p	LOC409904	7mer-m8	409904	uncharacterized LOC409904
ame-miR-3730-5p	LOC409904	7mer-m8	409904	uncharacterized LOC409904
ame-miR-3730-5p	LOC409904	7mer-1a	409904	uncharacterized LOC409904
ame-miR-3730-5p	LOC409904	7mer-1a	409904	uncharacterized LOC409904
ame-miR-3730-5p	LOC409904	7mer-m8	409904	uncharacterized LOC409904
ame-miR-3730-5p	LOC409904	7mer-m8	409904	uncharacterized LOC409904
ame-miR-3730-5p	LOC409904	7mer-1a	409904	uncharacterized LOC409904
ame-miR-3730-5p	LOC409904	7mer-1a	409904	uncharacterized LOC409904
ame-miR-3730-5p	LOC409904	7mer-m8	409904	uncharacterized LOC409904
ame-miR-3730-5p	LOC409904	7mer-1a	409904	uncharacterized LOC409904
ame-miR-3730-5p	LOC409904	6mer	409904	uncharacterized LOC409904
ame-miR-3730-5p	LOC409904	7mer-m8	409904	uncharacterized LOC409904
ame-miR-3730-5p	LOC409904	7mer-1a	409904	uncharacterized LOC409904
ame-miR-3730-5p	LOC409904	7mer-1a	409904	uncharacterized LOC409904
ame-miR-3730-5p	LOC409904	7mer-m8	409904	uncharacterized LOC409904
ame-miR-3730-5p	LOC409904	7mer-1a	409904	uncharacterized LOC409904
ame-miR-3730-5p	LOC409904	6mer	409904	uncharacterized LOC409904
ame-miR-3730-5p	LOC409904	7mer-m8	409904	uncharacterized LOC409904
ame-miR-3730-5p	LOC409904	7mer-1a	409904	uncharacterized LOC409904
ame-miR-3730-5p	LOC409904	7mer-1a	409904	uncharacterized LOC409904
ame-miR-3730-5p	LOC409904	7mer-m8	409904	uncharacterized LOC409904
ame-miR-3730-5p	LOC409904	7mer-1a	409904	uncharacterized LOC409904
ame-miR-3730-5p	LOC409904	6mer	409904	uncharacterized LOC409904
ame-miR-3730-5p	LOC409904	7mer-m8	409904	uncharacterized LOC409904
ame-miR-3730-5p	LOC409904	7mer-1a	409904	uncharacterized LOC409904
ame-miR-3730-5p	LOC409904	7mer-1a	409904	uncharacterized LOC409904
ame-miR-3730-5p	LOC409904	7mer-m8	409904	uncharacterized LOC409904
ame-miR-3730-5p	LOC409904	7mer-m8	409904	uncharacterized LOC409904
ame-miR-3730-5p	LOC409904	7mer-1a	409904	uncharacterized LOC409904
ame-miR-3730-5p	LOC409904	7mer-1a	409904	uncharacterized LOC409904
ame-miR-3730-5p	LOC409904	7mer-m8	409904	uncharacterized LOC409904
ame-miR-3730-5p	LOC409904	7mer-m8	409904	uncharacterized LOC409904
ame-miR-3730-5p	LOC409904	7mer-1a	409904	uncharacterized LOC409904
ame-miR-3730-5p	LOC409904	7mer-1a	409904	uncharacterized LOC409904
ame-miR-3730-5p	LOC410009	7mer-m8	410009	cadherin-related tumor suppressor
ame-miR-3730-5p	LOC410009	8mer-1a	410009	cadherin-related tumor suppressor
ame-miR-3730-5p	LOC410009	8mer-1a	410009	cadherin-related tumor suppressor
ame-miR-3730-5p	LOC410009	6mer	410009	cadherin-related tumor suppressor
ame-miR-3730-5p	LOC410009	7mer-m8	410009	cadherin-related tumor suppressor
ame-miR-3730-5p	LOC410009	6mer	410009	cadherin-related tumor suppressor
ame-miR-3730-5p	LOC410009	6mer	410009	cadherin-related tumor suppressor
ame-miR-3730-5p	LOC410009	6mer	410009	cadherin-related tumor suppressor
ame-miR-3730-5p	LOC410009	7mer-1a	410009	cadherin-related tumor suppressor
ame-miR-3730-5p	LOC410009	7mer-1a	410009	cadherin-related tumor suppressor
ame-miR-3730-5p	LOC410009	7mer-m8	410009	cadherin-related tumor suppressor
ame-miR-3730-5p	LOC410009	7mer-m8	410009	cadherin-related tumor suppressor
ame-miR-3730-5p	LOC410009	8mer-1a	410009	cadherin-related tumor suppressor
ame-miR-3730-5p	LOC410009	7mer-1a	410009	cadherin-related tumor suppressor
ame-miR-3730-5p	LOC410009	6mer	410009	cadherin-related tumor suppressor
ame-miR-3730-5p	LOC410009	6mer	410009	cadherin-related tumor suppressor
ame-miR-3730-5p	LOC410009	7mer-m8	410009	cadherin-related tumor suppressor
ame-miR-3730-5p	LOC410009	7mer-m8	410009	cadherin-related tumor suppressor
ame-miR-3730-5p	LOC410009	8mer-1a	410009	cadherin-related tumor suppressor
ame-miR-3730-5p	LOC410009	8mer-1a	410009	cadherin-related tumor suppressor
ame-miR-3730-5p	LOC410009	6mer	410009	cadherin-related tumor suppressor
ame-miR-3730-5p	LOC410009	7mer-m8	410009	cadherin-related tumor suppressor
ame-miR-3730-5p	LOC410009	6mer	410009	cadherin-related tumor suppressor
ame-miR-3730-5p	LOC410009	6mer	410009	cadherin-related tumor suppressor
ame-miR-3730-5p	LOC410009	7mer-1a	410009	cadherin-related tumor suppressor
ame-miR-3730-5p	LOC410009	7mer-1a	410009	cadherin-related tumor suppressor
ame-miR-3730-5p	LOC410009	7mer-m8	410009	cadherin-related tumor suppressor
ame-miR-3730-5p	LOC410009	7mer-m8	410009	cadherin-related tumor suppressor
ame-miR-3730-5p	LOC410009	8mer-1a	410009	cadherin-related tumor suppressor
ame-miR-3730-5p	LOC410009	7mer-1a	410009	cadherin-related tumor suppressor
ame-miR-3730-5p	LOC410009	6mer	410009	cadherin-related tumor suppressor
ame-miR-3730-5p	LOC410009	6mer	410009	cadherin-related tumor suppressor
ame-miR-3730-5p	LOC410009	7mer-m8	410009	cadherin-related tumor suppressor
ame-miR-3730-5p	LOC410604	7mer-m8	410604	protein phosphatase PP2A 55 kDa regulatory subunit
ame-miR-3730-5p	LOC410604	7mer-m8	410604	protein phosphatase PP2A 55 kDa regulatory subunit
ame-miR-3730-5p	LOC410604	7mer-m8	410604	protein phosphatase PP2A 55 kDa regulatory subunit
ame-miR-3730-5p	LOC410604	7mer-m8	410604	protein phosphatase PP2A 55 kDa regulatory subunit
ame-miR-3730-5p	LOC410604	7mer-m8	410604	protein phosphatase PP2A 55 kDa regulatory subunit
ame-miR-3730-5p	LOC410604	7mer-m8	410604	protein phosphatase PP2A 55 kDa regulatory subunit
ame-miR-3730-5p	LOC410604	7mer-m8	410604	protein phosphatase PP2A 55 kDa regulatory subunit
ame-miR-3730-5p	LOC410604	7mer-m8	410604	protein phosphatase PP2A 55 kDa regulatory subunit
ame-miR-3730-5p	LOC410604	7mer-m8	410604	protein phosphatase PP2A 55 kDa regulatory subunit
ame-miR-3730-5p	LOC411678	6mer	411678	serine/threonine-protein kinase Warts
ame-miR-3730-5p	LOC411678	6mer	411678	serine/threonine-protein kinase Warts
ame-miR-3730-5p	LOC411678	6mer	411678	serine/threonine-protein kinase Warts
ame-miR-3730-5p	LOC411678	6mer	411678	serine/threonine-protein kinase Warts
ame-miR-3730-5p	LOC412617	7mer-m8	412617	lipoma-preferred partner homolog
ame-miR-3730-5p	LOC412617	7mer-m8	412617	lipoma-preferred partner homolog
ame-miR-3730-5p	LOC412617	7mer-m8	412617	lipoma-preferred partner homolog
ame-miR-3730-5p	LOC413423	7mer-m8	413423	hemicentin-2
ame-miR-3730-5p	LOC413423	6mer	413423	hemicentin-2
ame-miR-3730-5p	LOC413423	6mer	413423	hemicentin-2
ame-miR-3730-5p	LOC413423	6mer	413423	hemicentin-2
ame-miR-3730-5p	LOC413423	6mer	413423	hemicentin-2
ame-miR-3730-5p	LOC413423	7mer-m8	413423	hemicentin-2
ame-miR-3730-5p	LOC413423	6mer	413423	hemicentin-2
ame-miR-3730-5p	LOC413440	6mer	413440	protein kibra
ame-miR-3730-5p	LOC413440	7mer-1a	413440	protein kibra
ame-miR-3730-5p	LOC413440	6mer	413440	protein kibra
ame-miR-3730-5p	LOC413440	7mer-1a	413440	protein kibra
ame-miR-3730-5p	LOC413440	6mer	413440	protein kibra
ame-miR-3730-5p	LOC413440	7mer-1a	413440	protein kibra
ame-miR-3730-5p	LOC413440	6mer	413440	protein kibra
ame-miR-3730-5p	LOC413834	7mer-m8	413834	atypical protein kinase C
ame-miR-3730-5p	LOC413834	7mer-m8	413834	atypical protein kinase C
ame-miR-3730-5p	LOC413834	7mer-m8	413834	atypical protein kinase C
ame-miR-3730-5p	LOC413834	7mer-m8	413834	atypical protein kinase C
ame-miR-3730-5p	LOC550710	6mer	550710	serine/threonine-protein phosphatase 2A catalytic subunit alpha isoform
ame-miR-3730-5p	LOC550710	7mer-1a	550710	serine/threonine-protein phosphatase 2A catalytic subunit alpha isoform
ame-miR-3730-5p	LOC551265	7mer-1a	551265	protein limb expression 1 homolog
ame-miR-3730-5p	LOC551369	6mer	551369	actin, clone 205
ame-miR-3730-5p	LOC551706	6mer	551706	unconventional myosin-IXb
ame-miR-3730-5p	LOC551706	8mer-1a	551706	unconventional myosin-IXb
ame-miR-3730-5p	LOC551706	6mer	551706	unconventional myosin-IXb
ame-miR-3730-5p	LOC551706	6mer	551706	unconventional myosin-IXb
ame-miR-3730-5p	LOC551706	8mer-1a	551706	unconventional myosin-IXb
ame-miR-3730-5p	LOC551706	6mer	551706	unconventional myosin-IXb
ame-miR-3730-5p	LOC551706	6mer	551706	unconventional myosin-IXb
ame-miR-3730-5p	LOC551706	8mer-1a	551706	unconventional myosin-IXb
ame-miR-3730-5p	LOC551706	6mer	551706	unconventional myosin-IXb
ame-miR-3730-5p	LOC551706	6mer	551706	unconventional myosin-IXb
ame-miR-3730-5p	LOC551706	8mer-1a	551706	unconventional myosin-IXb
ame-miR-3730-5p	LOC551706	6mer	551706	unconventional myosin-IXb
ame-miR-3730-5p	LOC551706	6mer	551706	unconventional myosin-IXb
ame-miR-3730-5p	LOC551706	8mer-1a	551706	unconventional myosin-IXb
ame-miR-3730-5p	LOC551706	6mer	551706	unconventional myosin-IXb
ame-miR-3730-5p	LOC551706	6mer	551706	unconventional myosin-IXb
ame-miR-3730-5p	LOC551706	8mer-1a	551706	unconventional myosin-IXb
ame-miR-3730-5p	LOC551706	6mer	551706	unconventional myosin-IXb
ame-miR-3730-5p	LOC551706	6mer	551706	unconventional myosin-IXb
ame-miR-3730-5p	LOC551706	8mer-1a	551706	unconventional myosin-IXb
ame-miR-3730-5p	LOC551706	6mer	551706	unconventional myosin-IXb
ame-miR-3730-5p	LOC551706	6mer	551706	unconventional myosin-IXb
ame-miR-3730-5p	LOC551706	8mer-1a	551706	unconventional myosin-IXb
ame-miR-3730-5p	LOC551706	6mer	551706	unconventional myosin-IXb
ame-miR-3730-5p	LOC551706	6mer	551706	unconventional myosin-IXb
ame-miR-3730-5p	LOC551706	8mer-1a	551706	unconventional myosin-IXb
ame-miR-3730-5p	LOC551706	6mer	551706	unconventional myosin-IXb
ame-miR-3730-5p	LOC551706	8mer-1a	551706	unconventional myosin-IXb
ame-miR-3730-5p	LOC551706	6mer	551706	unconventional myosin-IXb
ame-miR-3730-5p	LOC551706	6mer	551706	unconventional myosin-IXb
ame-miR-3730-5p	LOC551706	6mer	551706	unconventional myosin-IXb
ame-miR-3730-5p	LOC551706	6mer	551706	unconventional myosin-IXb
ame-miR-3730-5p	LOC551706	7mer-1a	551706	unconventional myosin-IXb
ame-miR-3730-5p	LOC551706	6mer	551706	unconventional myosin-IXb
ame-miR-3730-5p	LOC551706	6mer	551706	unconventional myosin-IXb
ame-miR-3730-5p	LOC552079	6mer	552079	homeobox protein homothorax
ame-miR-3730-5p	LOC552079	6mer	552079	homeobox protein homothorax
ame-miR-3730-5p	LOC552079	6mer	552079	homeobox protein homothorax
ame-miR-3730-5p	LOC552079	6mer	552079	homeobox protein homothorax
ame-miR-3730-5p	LOC552413	6mer	552413	scaffold protein salvador
ame-miR-3730-5p	LOC724292	6mer	724292	disks large 1 tumor suppressor protein
ame-miR-3730-5p	LOC724292	6mer	724292	disks large 1 tumor suppressor protein
ame-miR-3730-5p	LOC724292	6mer	724292	disks large 1 tumor suppressor protein
ame-miR-3730-5p	LOC724292	6mer	724292	disks large 1 tumor suppressor protein
ame-miR-3730-5p	LOC724292	6mer	724292	disks large 1 tumor suppressor protein
ame-miR-3730-5p	LOC724292	6mer	724292	disks large 1 tumor suppressor protein
ame-miR-3730-5p	LOC724292	6mer	724292	disks large 1 tumor suppressor protein
ame-miR-3730-5p	LOC724292	6mer	724292	disks large 1 tumor suppressor protein
ame-miR-3730-5p	LOC724292	6mer	724292	disks large 1 tumor suppressor protein
ame-miR-3730-5p	LOC724292	6mer	724292	disks large 1 tumor suppressor protein
ame-miR-3730-5p	LOC724292	6mer	724292	disks large 1 tumor suppressor protein
ame-miR-3730-5p	LOC724292	6mer	724292	disks large 1 tumor suppressor protein
ame-miR-3730-5p	LOC724292	6mer	724292	disks large 1 tumor suppressor protein
ame-miR-3730-5p	LOC724292	6mer	724292	disks large 1 tumor suppressor protein
ame-miR-3730-5p	LOC724292	6mer	724292	disks large 1 tumor suppressor protein
ame-miR-3730-5p	LOC724292	6mer	724292	disks large 1 tumor suppressor protein
ame-miR-3730-5p	LOC724292	6mer	724292	disks large 1 tumor suppressor protein
ame-miR-3730-5p	LOC724292	6mer	724292	disks large 1 tumor suppressor protein
ame-miR-3730-5p	LOC724292	6mer	724292	disks large 1 tumor suppressor protein
ame-miR-3730-5p	LOC724292	6mer	724292	disks large 1 tumor suppressor protein
ame-miR-3730-5p	LOC724292	6mer	724292	disks large 1 tumor suppressor protein
ame-miR-3730-5p	LOC724292	6mer	724292	disks large 1 tumor suppressor protein
ame-miR-3730-5p	LOC724292	6mer	724292	disks large 1 tumor suppressor protein
ame-miR-3730-5p	LOC724292	6mer	724292	disks large 1 tumor suppressor protein
ame-miR-3730-5p	LOC724292	6mer	724292	disks large 1 tumor suppressor protein
ame-miR-3730-5p	LOC724292	6mer	724292	disks large 1 tumor suppressor protein
ame-miR-3730-5p	LOC724292	6mer	724292	disks large 1 tumor suppressor protein
ame-miR-3730-5p	LOC724292	6mer	724292	disks large 1 tumor suppressor protein
ame-miR-3730-5p	LOC724292	6mer	724292	disks large 1 tumor suppressor protein
ame-miR-3730-5p	LOC724292	6mer	724292	disks large 1 tumor suppressor protein
ame-miR-3730-5p	LOC724292	6mer	724292	disks large 1 tumor suppressor protein
ame-miR-3730-5p	LOC724292	6mer	724292	disks large 1 tumor suppressor protein
ame-miR-3730-5p	LOC724292	6mer	724292	disks large 1 tumor suppressor protein
ame-miR-3730-5p	LOC724292	6mer	724292	disks large 1 tumor suppressor protein
ame-miR-3730-5p	LOC724292	6mer	724292	disks large 1 tumor suppressor protein
ame-miR-3730-5p	LOC724292	6mer	724292	disks large 1 tumor suppressor protein
ame-miR-3730-5p	LOC724292	6mer	724292	disks large 1 tumor suppressor protein
ame-miR-3730-5p	LOC724292	6mer	724292	disks large 1 tumor suppressor protein
ame-miR-3730-5p	LOC724292	6mer	724292	disks large 1 tumor suppressor protein
ame-miR-3730-5p	LOC724292	6mer	724292	disks large 1 tumor suppressor protein
ame-miR-3730-5p	LOC724292	6mer	724292	disks large 1 tumor suppressor protein
ame-miR-3730-5p	LOC724292	6mer	724292	disks large 1 tumor suppressor protein
ame-miR-3730-5p	LOC724292	6mer	724292	disks large 1 tumor suppressor protein
ame-miR-3730-5p	LOC724292	6mer	724292	disks large 1 tumor suppressor protein
ame-miR-3730-5p	LOC724292	6mer	724292	disks large 1 tumor suppressor protein
ame-miR-3730-5p	LOC724292	6mer	724292	disks large 1 tumor suppressor protein
ame-miR-3730-5p	LOC724292	6mer	724292	disks large 1 tumor suppressor protein
ame-miR-3730-5p	LOC724292	6mer	724292	disks large 1 tumor suppressor protein
ame-miR-3730-5p	LOC724292	6mer	724292	disks large 1 tumor suppressor protein
ame-miR-3730-5p	LOC724292	6mer	724292	disks large 1 tumor suppressor protein
ame-miR-3730-5p	LOC724292	6mer	724292	disks large 1 tumor suppressor protein
ame-miR-3730-5p	LOC724292	6mer	724292	disks large 1 tumor suppressor protein
ame-miR-3730-5p	LOC725245	6mer	725245	protein eiger
ame-miR-3730-5p	LOC725245	6mer	725245	protein eiger
ame-miR-3730-5p	LOC725245	6mer	725245	protein eiger
ame-miR-3730-5p	LOC725245	6mer	725245	protein eiger
ame-miR-3730-5p	LOC725245	8mer-1a	725245	protein eiger
ame-miR-3730-5p	LOC725591	7mer-1a	725591	protein crumbs
ame-miR-3730-5p	LOC725591	6mer	725591	protein crumbs
ame-miR-3730-5p	LOC725591	6mer	725591	protein crumbs
ame-miR-3730-5p	LOC725591	7mer-1a	725591	protein crumbs
ame-miR-3730-5p	LOC725591	6mer	725591	protein crumbs
ame-miR-3730-5p	LOC725591	6mer	725591	protein crumbs
ame-miR-3730-5p	LOC725591	7mer-1a	725591	protein crumbs
ame-miR-3730-5p	LOC725591	6mer	725591	protein crumbs
ame-miR-3730-5p	LOC725591	6mer	725591	protein crumbs
ame-miR-3730-5p	LOC100577697	6mer	100577697	uncharacterized LOC100577697
ame-miR-3730-5p	LOC100577697	6mer	100577697	uncharacterized LOC100577697
ame-miR-3730-5p	LOC102655329	6mer	102655329	14-3-3 protein zeta
ame-miR-3730-5p	LOC102655329	6mer	102655329	14-3-3 protein zeta
ame-miR-3730-5p	LOC102655329	6mer	102655329	14-3-3 protein zeta
ame-miR-3730-5p	LOC102655329	6mer	102655329	14-3-3 protein zeta
ame-miR-3730-5p	LOC102655329	6mer	102655329	14-3-3 protein zeta
ame-miR-3730-5p	LOC102655329	7mer-m8	102655329	14-3-3 protein zeta
ame-miR-3730-5p	LOC102655329	6mer	102655329	14-3-3 protein zeta
ame-miR-3730-5p	LOC102655329	6mer	102655329	14-3-3 protein zeta
ame-miR-3730-5p	LOC102655329	7mer-m8	102655329	14-3-3 protein zeta
ame-miR-3730-5p	LOC102655329	6mer	102655329	14-3-3 protein zeta
ame-miR-3730-5p	LOC102655329	6mer	102655329	14-3-3 protein zeta
ame-miR-3730-5p	LOC102655329	7mer-m8	102655329	14-3-3 protein zeta
ame-miR-3730-5p	LOC102655329	6mer	102655329	14-3-3 protein zeta
ame-miR-3730-5p	LOC102655329	6mer	102655329	14-3-3 protein zeta
ame-miR-3730-5p	LOC113218545	6mer	113218545	ras-interacting protein RIP3-like
ame-miR-3730-5p	LOC408877	7mer-m8	408877	neurogenic protein mastermind
ame-miR-3730-5p	LOC408877	6mer	408877	neurogenic protein mastermind
ame-miR-3730-5p	LOC408877	6mer	408877	neurogenic protein mastermind
ame-miR-3730-5p	LOC408877	6mer	408877	neurogenic protein mastermind
ame-miR-3730-5p	LOC408877	6mer	408877	neurogenic protein mastermind
ame-miR-3730-5p	LOC408877	6mer	408877	neurogenic protein mastermind
ame-miR-3730-5p	LOC408877	6mer	408877	neurogenic protein mastermind
ame-miR-3730-5p	LOC408877	6mer	408877	neurogenic protein mastermind
ame-miR-3730-5p	LOC408877	6mer	408877	neurogenic protein mastermind
ame-miR-3730-5p	LOC408877	6mer	408877	neurogenic protein mastermind
ame-miR-3730-5p	LOC408877	6mer	408877	neurogenic protein mastermind
ame-miR-3730-5p	LOC408877	7mer-m8	408877	neurogenic protein mastermind
ame-miR-3730-5p	LOC408877	6mer	408877	neurogenic protein mastermind
ame-miR-3730-5p	LOC408877	6mer	408877	neurogenic protein mastermind
ame-miR-3730-5p	LOC410351	6mer	410351	neurogenic locus protein delta
ame-miR-3730-5p	LOC410351	6mer	410351	neurogenic locus protein delta
ame-miR-3730-5p	LOC410351	6mer	410351	neurogenic locus protein delta
ame-miR-3730-5p	LOC410351	7mer-m8	410351	neurogenic locus protein delta
ame-miR-3730-5p	LOC410351	6mer	410351	neurogenic locus protein delta
ame-miR-3730-5p	LOC410351	6mer	410351	neurogenic locus protein delta
ame-miR-3730-5p	LOC410351	6mer	410351	neurogenic locus protein delta
ame-miR-3730-5p	LOC410351	6mer	410351	neurogenic locus protein delta
ame-miR-3730-5p	LOC410351	7mer-m8	410351	neurogenic locus protein delta
ame-miR-3730-5p	LOC410351	7mer-m8	410351	neurogenic locus protein delta
ame-miR-3730-5p	LOC411086	6mer	411086	protein jagged-1
ame-miR-3730-5p	LOC411086	7mer-1a	411086	protein jagged-1
ame-miR-3730-5p	LOC411086	6mer	411086	protein jagged-1
ame-miR-3730-5p	LOC411086	6mer	411086	protein jagged-1
ame-miR-3730-5p	LOC411086	6mer	411086	protein jagged-1
ame-miR-3730-5p	LOC411086	7mer-1a	411086	protein jagged-1
ame-miR-3730-5p	LOC411086	6mer	411086	protein jagged-1
ame-miR-3730-5p	LOC411086	6mer	411086	protein jagged-1
ame-miR-3730-5p	LOC411086	6mer	411086	protein jagged-1
ame-miR-3730-5p	LOC411086	7mer-1a	411086	protein jagged-1
ame-miR-3730-5p	LOC411086	6mer	411086	protein jagged-1
ame-miR-3730-5p	LOC411086	6mer	411086	protein jagged-1
ame-miR-3730-5p	LOC413289	6mer	413289	neurogenic locus Notch protein
ame-miR-3730-5p	LOC413289	6mer	413289	neurogenic locus Notch protein
ame-miR-3730-5p	LOC413289	6mer	413289	neurogenic locus Notch protein
ame-miR-3730-5p	LOC413289	6mer	413289	neurogenic locus Notch protein
ame-miR-3730-5p	LOC413870	6mer	413870	suppressor of hairless protein
ame-miR-3730-5p	LOC413870	6mer	413870	suppressor of hairless protein
ame-miR-3730-5p	LOC413870	7mer-1a	413870	suppressor of hairless protein
ame-miR-3730-5p	LOC413870	6mer	413870	suppressor of hairless protein
ame-miR-3730-5p	LOC413870	7mer-1a	413870	suppressor of hairless protein
ame-miR-3730-5p	LOC413870	6mer	413870	suppressor of hairless protein
ame-miR-3730-5p	LOC413870	7mer-1a	413870	suppressor of hairless protein
ame-miR-3730-5p	LOC551225	6mer	551225	puff-specific protein Bx42
ame-miR-3730-5p	LOC551501	6mer	551501	fringe glycosyltransferase
ame-miR-3730-5p	LOC551695	7mer-1a	551695	gamma-secretase subunit pen-2
ame-miR-3730-5p	KAT2A	7mer-m8	552646	K(lysine) acetyltransferase 2A
ame-miR-3730-5p	KAT2A	7mer-m8	552646	K(lysine) acetyltransferase 2A
ame-miR-3730-5p	KAT2A	7mer-m8	552646	K(lysine) acetyltransferase 2A
ame-miR-3730-5p	KAT2A	7mer-m8	552646	K(lysine) acetyltransferase 2A
ame-miR-3730-5p	LOC724935	6mer	724935	protein deltex
ame-miR-3730-5p	LOC727399	7mer-m8	727399	protein numb
ame-miR-3730-5p	LOC727399	7mer-m8	727399	protein numb
ame-miR-3730-5p	LOC727399	7mer-m8	727399	protein numb
ame-miR-3730-5p	LOC727399	7mer-m8	727399	protein numb
ame-miR-3730-5p	LOC727399	7mer-m8	727399	protein numb
ame-miR-3730-5p	LOC727399	7mer-m8	727399	protein numb
ame-miR-3730-5p	LOC406073	8mer-1a	406073	homeobox protein prospero
ame-miR-3730-5p	LOC406073	6mer	406073	homeobox protein prospero
ame-miR-3730-5p	LOC406073	8mer-1a	406073	homeobox protein prospero
ame-miR-3730-5p	LOC406073	6mer	406073	homeobox protein prospero
ame-miR-3730-5p	PRF	7mer-1a	406154	profilin
ame-miR-3730-5p	PRF	7mer-1a	406154	profilin
ame-miR-3730-5p	LOC408442	6mer	408442	bone morphogenetic protein receptor type-1B
ame-miR-3730-5p	LOC408442	6mer	408442	bone morphogenetic protein receptor type-1B
ame-miR-3730-5p	LOC408442	6mer	408442	bone morphogenetic protein receptor type-1B
ame-miR-3730-5p	LOC408844	7mer-1a	408844	dual specificity protein phosphatase 10
ame-miR-3730-5p	LOC408844	6mer	408844	dual specificity protein phosphatase 10
ame-miR-3730-5p	LOC408844	6mer	408844	dual specificity protein phosphatase 10
ame-miR-3730-5p	LOC408844	6mer	408844	dual specificity protein phosphatase 10
ame-miR-3730-5p	LOC408844	7mer-1a	408844	dual specificity protein phosphatase 10
ame-miR-3730-5p	LOC408844	6mer	408844	dual specificity protein phosphatase 10
ame-miR-3730-5p	LOC408844	6mer	408844	dual specificity protein phosphatase 10
ame-miR-3730-5p	LOC408844	6mer	408844	dual specificity protein phosphatase 10
ame-miR-3730-5p	LOC409498	6mer	409498	kinase suppressor of Ras 2
ame-miR-3730-5p	LOC409925	6mer	409925	dual specificity mitogen-activated protein kinase kinase dSOR1
ame-miR-3730-5p	LOC410344	6mer	410344	ubiquitin carboxyl-terminal hydrolase CYLD
ame-miR-3730-5p	LOC410537	7mer-m8	410537	protein lozenge
ame-miR-3730-5p	LOC410537	6mer	410537	protein lozenge
ame-miR-3730-5p	LOC410622	6mer	410622	uncharacterized LOC410622
ame-miR-3730-5p	LOC410622	7mer-1a	410622	uncharacterized LOC410622
ame-miR-3730-5p	LOC410649	6mer	410649	tyrosine-protein kinase Btk29A
ame-miR-3730-5p	LOC410671	6mer	410671	proto-oncogene tyrosine-protein kinase ROS
ame-miR-3730-5p	LOC410671	6mer	410671	proto-oncogene tyrosine-protein kinase ROS
ame-miR-3730-5p	LOC410671	8mer-1a	410671	proto-oncogene tyrosine-protein kinase ROS
ame-miR-3730-5p	LOC410671	6mer	410671	proto-oncogene tyrosine-protein kinase ROS
ame-miR-3730-5p	LOC410671	6mer	410671	proto-oncogene tyrosine-protein kinase ROS
ame-miR-3730-5p	LOC410671	6mer	410671	proto-oncogene tyrosine-protein kinase ROS
ame-miR-3730-5p	LOC410671	8mer-1a	410671	proto-oncogene tyrosine-protein kinase ROS
ame-miR-3730-5p	LOC410671	6mer	410671	proto-oncogene tyrosine-protein kinase ROS
ame-miR-3730-5p	LOC410671	6mer	410671	proto-oncogene tyrosine-protein kinase ROS
ame-miR-3730-5p	LOC410671	6mer	410671	proto-oncogene tyrosine-protein kinase ROS
ame-miR-3730-5p	LOC410671	8mer-1a	410671	proto-oncogene tyrosine-protein kinase ROS
ame-miR-3730-5p	LOC410671	6mer	410671	proto-oncogene tyrosine-protein kinase ROS
ame-miR-3730-5p	LOC410671	6mer	410671	proto-oncogene tyrosine-protein kinase ROS
ame-miR-3730-5p	LOC410671	6mer	410671	proto-oncogene tyrosine-protein kinase ROS
ame-miR-3730-5p	LOC410671	8mer-1a	410671	proto-oncogene tyrosine-protein kinase ROS
ame-miR-3730-5p	LOC410671	6mer	410671	proto-oncogene tyrosine-protein kinase ROS
ame-miR-3730-5p	LOC410671	8mer-1a	410671	proto-oncogene tyrosine-protein kinase ROS
ame-miR-3730-5p	LOC410671	6mer	410671	proto-oncogene tyrosine-protein kinase ROS
ame-miR-3730-5p	LOC410671	6mer	410671	proto-oncogene tyrosine-protein kinase ROS
ame-miR-3730-5p	LOC410671	6mer	410671	proto-oncogene tyrosine-protein kinase ROS
ame-miR-3730-5p	LOC410811	6mer	410811	ras GTPase-activating protein 1
ame-miR-3730-5p	LOC410811	6mer	410811	ras GTPase-activating protein 1
ame-miR-3730-5p	LOC410918	6mer	410918	protein tramtrack, beta isoform
ame-miR-3730-5p	LOC410918	6mer	410918	protein tramtrack, beta isoform
ame-miR-3730-5p	LOC410918	6mer	410918	protein tramtrack, beta isoform
ame-miR-3730-5p	LOC410918	6mer	410918	protein tramtrack, beta isoform
ame-miR-3730-5p	LOC410918	7mer-m8	410918	protein tramtrack, beta isoform
ame-miR-3730-5p	LOC410918	6mer	410918	protein tramtrack, beta isoform
ame-miR-3730-5p	LOC410918	7mer-1a	410918	protein tramtrack, beta isoform
ame-miR-3730-5p	LOC410918	6mer	410918	protein tramtrack, beta isoform
ame-miR-3730-5p	LOC410918	6mer	410918	protein tramtrack, beta isoform
ame-miR-3730-5p	LOC411173	6mer	411173	torso-like protein
ame-miR-3730-5p	LOC411173	7mer-m8	411173	torso-like protein
ame-miR-3730-5p	LOC411173	6mer	411173	torso-like protein
ame-miR-3730-5p	LOC412916	6mer	412916	ETS-like protein pointed
ame-miR-3730-5p	LOC413018	6mer	413018	exportin-1
ame-miR-3730-5p	LOC413018	6mer	413018	exportin-1
ame-miR-3730-5p	LOC413018	6mer	413018	exportin-1
ame-miR-3730-5p	LOC413018	6mer	413018	exportin-1
ame-miR-3730-5p	LOC413464	7mer-1a	413464	tyrosine-protein kinase Src64B
ame-miR-3730-5p	LOC413464	6mer	413464	tyrosine-protein kinase Src64B
ame-miR-3730-5p	LOC413464	6mer	413464	tyrosine-protein kinase Src64B
ame-miR-3730-5p	LOC413464	6mer	413464	tyrosine-protein kinase Src64B
ame-miR-3730-5p	LOC413464	6mer	413464	tyrosine-protein kinase Src64B
ame-miR-3730-5p	LOC413464	7mer-1a	413464	tyrosine-protein kinase Src64B
ame-miR-3730-5p	LOC413464	6mer	413464	tyrosine-protein kinase Src64B
ame-miR-3730-5p	LOC413464	6mer	413464	tyrosine-protein kinase Src64B
ame-miR-3730-5p	LOC413464	7mer-1a	413464	tyrosine-protein kinase Src64B
ame-miR-3730-5p	LOC413464	7mer-1a	413464	tyrosine-protein kinase Src64B
ame-miR-3730-5p	LOC413464	6mer	413464	tyrosine-protein kinase Src64B
ame-miR-3730-5p	LOC413464	6mer	413464	tyrosine-protein kinase Src64B
ame-miR-3730-5p	LOC413504	7mer-1a	413504	serine/threonine-protein kinase mig-15
ame-miR-3730-5p	LOC413504	6mer	413504	serine/threonine-protein kinase mig-15
ame-miR-3730-5p	LOC413504	7mer-1a	413504	serine/threonine-protein kinase mig-15
ame-miR-3730-5p	LOC413504	6mer	413504	serine/threonine-protein kinase mig-15
ame-miR-3730-5p	LOC413504	7mer-1a	413504	serine/threonine-protein kinase mig-15
ame-miR-3730-5p	LOC413504	6mer	413504	serine/threonine-protein kinase mig-15
ame-miR-3730-5p	LOC413504	7mer-1a	413504	serine/threonine-protein kinase mig-15
ame-miR-3730-5p	LOC413504	6mer	413504	serine/threonine-protein kinase mig-15
ame-miR-3730-5p	LOC413504	7mer-1a	413504	serine/threonine-protein kinase mig-15
ame-miR-3730-5p	LOC413504	6mer	413504	serine/threonine-protein kinase mig-15
ame-miR-3730-5p	LOC413504	7mer-1a	413504	serine/threonine-protein kinase mig-15
ame-miR-3730-5p	LOC413504	6mer	413504	serine/threonine-protein kinase mig-15
ame-miR-3730-5p	LOC413504	7mer-1a	413504	serine/threonine-protein kinase mig-15
ame-miR-3730-5p	LOC413504	6mer	413504	serine/threonine-protein kinase mig-15
ame-miR-3730-5p	LOC413504	7mer-1a	413504	serine/threonine-protein kinase mig-15
ame-miR-3730-5p	LOC413504	6mer	413504	serine/threonine-protein kinase mig-15
ame-miR-3730-5p	LOC413504	7mer-1a	413504	serine/threonine-protein kinase mig-15
ame-miR-3730-5p	LOC413504	6mer	413504	serine/threonine-protein kinase mig-15
ame-miR-3730-5p	LOC413504	7mer-1a	413504	serine/threonine-protein kinase mig-15
ame-miR-3730-5p	LOC413504	6mer	413504	serine/threonine-protein kinase mig-15
ame-miR-3730-5p	LOC413504	7mer-1a	413504	serine/threonine-protein kinase mig-15
ame-miR-3730-5p	LOC413504	6mer	413504	serine/threonine-protein kinase mig-15
ame-miR-3730-5p	LOC413504	7mer-1a	413504	serine/threonine-protein kinase mig-15
ame-miR-3730-5p	LOC413504	6mer	413504	serine/threonine-protein kinase mig-15
ame-miR-3730-5p	LOC413504	7mer-1a	413504	serine/threonine-protein kinase mig-15
ame-miR-3730-5p	LOC413504	6mer	413504	serine/threonine-protein kinase mig-15
ame-miR-3730-5p	LOC413504	7mer-1a	413504	serine/threonine-protein kinase mig-15
ame-miR-3730-5p	LOC413504	6mer	413504	serine/threonine-protein kinase mig-15
ame-miR-3730-5p	LOC413504	7mer-1a	413504	serine/threonine-protein kinase mig-15
ame-miR-3730-5p	LOC413504	6mer	413504	serine/threonine-protein kinase mig-15
ame-miR-3730-5p	LOC413504	7mer-1a	413504	serine/threonine-protein kinase mig-15
ame-miR-3730-5p	LOC413504	6mer	413504	serine/threonine-protein kinase mig-15
ame-miR-3730-5p	LOC413504	7mer-1a	413504	serine/threonine-protein kinase mig-15
ame-miR-3730-5p	LOC413504	6mer	413504	serine/threonine-protein kinase mig-15
ame-miR-3730-5p	LOC413946	7mer-1a	413946	myocyte-specific enhancer factor 2
ame-miR-3730-5p	LOC413946	6mer	413946	myocyte-specific enhancer factor 2
ame-miR-3730-5p	LOC413946	7mer-1a	413946	myocyte-specific enhancer factor 2
ame-miR-3730-5p	LOC413946	7mer-1a	413946	myocyte-specific enhancer factor 2
ame-miR-3730-5p	LOC413946	7mer-1a	413946	myocyte-specific enhancer factor 2
ame-miR-3730-5p	LOC413946	7mer-1a	413946	myocyte-specific enhancer factor 2
ame-miR-3730-5p	LOC413946	7mer-1a	413946	myocyte-specific enhancer factor 2
ame-miR-3730-5p	LOC551970	7mer-1a	551970	dual oxidase
ame-miR-3730-5p	LOC551970	7mer-1a	551970	dual oxidase
ame-miR-3730-5p	LOC551970	7mer-1a	551970	dual oxidase
ame-miR-3730-5p	LOC551970	7mer-1a	551970	dual oxidase
ame-miR-3730-5p	LOC551970	7mer-1a	551970	dual oxidase
ame-miR-3730-5p	LOC551970	7mer-1a	551970	dual oxidase
ame-miR-3730-5p	LOC551970	7mer-1a	551970	dual oxidase
ame-miR-3730-5p	LOC551970	7mer-1a	551970	dual oxidase
ame-miR-3730-5p	LOC551970	7mer-1a	551970	dual oxidase
ame-miR-3730-5p	LOC551970	7mer-1a	551970	dual oxidase
ame-miR-3730-5p	LOC551970	7mer-1a	551970	dual oxidase
ame-miR-3730-5p	LOC551970	7mer-1a	551970	dual oxidase
ame-miR-3730-5p	LOC551970	7mer-1a	551970	dual oxidase
ame-miR-3730-5p	LOC551970	7mer-1a	551970	dual oxidase
ame-miR-3730-5p	LOC551970	7mer-1a	551970	dual oxidase
ame-miR-3730-5p	LOC551970	7mer-1a	551970	dual oxidase
ame-miR-3730-5p	LOC551970	7mer-1a	551970	dual oxidase
ame-miR-3730-5p	LOC551970	7mer-1a	551970	dual oxidase
ame-miR-3730-5p	LOC552187	7mer-m8	552187	leucine-rich repeat-containing protein 4
ame-miR-3730-5p	LOC552187	8mer-1a	552187	leucine-rich repeat-containing protein 4
ame-miR-3730-5p	LOC552187	6mer	552187	leucine-rich repeat-containing protein 4
ame-miR-3730-5p	LOC724169	7mer-m8	724169	transcription factor kayak
ame-miR-3730-5p	LOC724169	7mer-1a	724169	transcription factor kayak
ame-miR-3730-5p	LOC725117	6mer	725117	protein sprouty homolog 2
ame-miR-3730-5p	LOC725117	6mer	725117	protein sprouty homolog 2
ame-miR-3730-5p	LOC725327	6mer	725327	nuclear receptor subfamily 2 group E member 1
ame-miR-3730-5p	LOC725327	6mer	725327	nuclear receptor subfamily 2 group E member 1
ame-miR-3730-5p	LOC726842	6mer	726842	optomotor-blind protein
ame-miR-3730-5p	LOC726842	6mer	726842	optomotor-blind protein
ame-miR-3730-5p	LOC726842	8mer-1a	726842	optomotor-blind protein
ame-miR-3730-5p	LOC726842	6mer	726842	optomotor-blind protein
ame-miR-3730-5p	LOC726842	6mer	726842	optomotor-blind protein
ame-miR-3730-5p	LOC726842	6mer	726842	optomotor-blind protein
ame-miR-3730-5p	LOC726842	8mer-1a	726842	optomotor-blind protein
ame-miR-3730-5p	LOC726842	6mer	726842	optomotor-blind protein
ame-miR-3730-5p	LOC726842	6mer	726842	optomotor-blind protein
ame-miR-3730-5p	LOC726842	6mer	726842	optomotor-blind protein
ame-miR-3730-5p	LOC726842	8mer-1a	726842	optomotor-blind protein
ame-miR-3730-5p	LOC726842	6mer	726842	optomotor-blind protein
ame-miR-3730-5p	LOC726947	6mer	726947	TGF-beta-activated kinase 1 and MAP3K7-binding protein 3
ame-miR-3730-5p	LOC726947	6mer	726947	TGF-beta-activated kinase 1 and MAP3K7-binding protein 3
ame-miR-3730-5p	LOC100576369	7mer-1a	100576369	ets DNA-binding protein pokkuri
ame-miR-3730-5p	LOC100576369	7mer-1a	100576369	ets DNA-binding protein pokkuri
ame-miR-3730-5p	LOC100576369	6mer	100576369	ets DNA-binding protein pokkuri
ame-miR-3730-5p	LOC100576369	7mer-1a	100576369	ets DNA-binding protein pokkuri
ame-miR-3730-5p	LOC100576369	7mer-1a	100576369	ets DNA-binding protein pokkuri
ame-miR-3730-5p	LOC100576369	6mer	100576369	ets DNA-binding protein pokkuri
ame-miR-3730-5p	LOC100577174	6mer	100577174	ras-responsive element-binding protein 1
ame-miR-3730-5p	LOC100577174	7mer-m8	100577174	ras-responsive element-binding protein 1
ame-miR-3730-5p	LOC100577174	6mer	100577174	ras-responsive element-binding protein 1
ame-miR-3730-5p	LOC100577174	7mer-m8	100577174	ras-responsive element-binding protein 1
ame-miR-3730-5p	LOC100577174	6mer	100577174	ras-responsive element-binding protein 1
ame-miR-3730-5p	LOC100577174	7mer-m8	100577174	ras-responsive element-binding protein 1
ame-miR-3730-5p	LOC100577174	6mer	100577174	ras-responsive element-binding protein 1
ame-miR-3730-5p	LOC100577174	6mer	100577174	ras-responsive element-binding protein 1
ame-miR-3730-5p	LOC100577174	7mer-m8	100577174	ras-responsive element-binding protein 1
ame-miR-3730-5p	LOC100577214	6mer	100577214	protein giant-lens
ame-miR-3730-5p	LOC100577393	6mer	100577393	epidermal growth factor receptor-like
ame-miR-3730-5p	LOC100577393	6mer	100577393	epidermal growth factor receptor-like
ame-miR-3730-5p	LOC100577393	7mer-m8	100577393	epidermal growth factor receptor-like
ame-miR-3730-5p	LOC100577393	6mer	100577393	epidermal growth factor receptor-like
ame-miR-3730-5p	LOC100577393	7mer-m8	100577393	epidermal growth factor receptor-like
ame-miR-3730-5p	LOC100577393	6mer	100577393	epidermal growth factor receptor-like
ame-miR-3730-5p	LOC100577393	6mer	100577393	epidermal growth factor receptor-like
ame-miR-3730-5p	LOC100577393	7mer-m8	100577393	epidermal growth factor receptor-like
ame-miR-3730-5p	LOC100577393	6mer	100577393	epidermal growth factor receptor-like
ame-miR-3730-5p	LOC100577393	6mer	100577393	epidermal growth factor receptor-like
ame-miR-3730-5p	LOC100577393	7mer-m8	100577393	epidermal growth factor receptor-like
ame-miR-3730-5p	LOC100577393	6mer	100577393	epidermal growth factor receptor-like
ame-miR-3730-5p	LOC100577393	6mer	100577393	epidermal growth factor receptor-like
ame-miR-3730-5p	LOC100577393	7mer-m8	100577393	epidermal growth factor receptor-like
ame-miR-3730-5p	LOC100577393	6mer	100577393	epidermal growth factor receptor-like
ame-miR-3730-5p	LOC100577393	6mer	100577393	epidermal growth factor receptor-like
ame-miR-3730-5p	LOC100577393	6mer	100577393	epidermal growth factor receptor-like
ame-miR-3730-5p	LOC100577393	7mer-m8	100577393	epidermal growth factor receptor-like
ame-miR-3730-5p	LOC100577393	6mer	100577393	epidermal growth factor receptor-like
ame-miR-3730-5p	LOC100577393	6mer	100577393	epidermal growth factor receptor-like
ame-miR-3730-5p	LOC100577393	6mer	100577393	epidermal growth factor receptor-like
ame-miR-3730-5p	LOC100577393	7mer-m8	100577393	epidermal growth factor receptor-like
ame-miR-3730-5p	LOC100577393	6mer	100577393	epidermal growth factor receptor-like
ame-miR-3730-5p	LOC100577521	7mer-1a	100577521	uncharacterized LOC100577521
ame-miR-3730-5p	LOC100578561	7mer-1a	100578561	early growth response protein 1
ame-miR-3730-5p	LOC100578561	6mer	100578561	early growth response protein 1
ame-miR-3730-5p	LOC100578561	7mer-m8	100578561	early growth response protein 1
ame-miR-3730-5p	LOC100578699	7mer-1a	100578699	uncharacterized LOC100578699
ame-miR-3730-5p	LOC100578699	6mer	100578699	uncharacterized LOC100578699
ame-miR-3730-5p	LOC100578885	7mer-m8	100578885	putative transcription factor capicua
ame-miR-3730-5p	LOC107964404	6mer	107964404	protein phosphatase 1B
ame-miR-3730-5p	LOC107964404	6mer	107964404	protein phosphatase 1B
ame-miR-3730-5p	LOC107964404	6mer	107964404	protein phosphatase 1B
ame-miR-3730-5p	LOC410776	6mer	410776	protein 60A
ame-miR-3730-5p	LOC410776	6mer	410776	protein 60A
ame-miR-3730-5p	LOC410776	6mer	410776	protein 60A
ame-miR-3730-5p	LOC411627	6mer	411627	retinoblastoma-like protein 1
ame-miR-3730-5p	LOC411627	6mer	411627	retinoblastoma-like protein 1
ame-miR-3730-5p	LOC411627	6mer	411627	retinoblastoma-like protein 1
ame-miR-3730-5p	LOC411627	6mer	411627	retinoblastoma-like protein 1
ame-miR-3730-5p	LOC413371	6mer	413371	mothers against decapentaplegic homolog 6
ame-miR-3730-5p	LOC413371	7mer-m8	413371	mothers against decapentaplegic homolog 6
ame-miR-3730-5p	LOC413371	7mer-1a	413371	mothers against decapentaplegic homolog 6
ame-miR-3730-5p	LOC413371	6mer	413371	mothers against decapentaplegic homolog 6
ame-miR-3730-5p	LOC550930	6mer	550930	TGF-beta receptor type-1
ame-miR-3730-5p	LOC550930	6mer	550930	TGF-beta receptor type-1
ame-miR-3730-5p	LOC550930	6mer	550930	TGF-beta receptor type-1
ame-miR-3730-5p	LOC550930	6mer	550930	TGF-beta receptor type-1
ame-miR-3730-5p	LOC550930	6mer	550930	TGF-beta receptor type-1
ame-miR-3730-5p	LOC550930	6mer	550930	TGF-beta receptor type-1
ame-miR-3730-5p	LOC550930	6mer	550930	TGF-beta receptor type-1
ame-miR-3730-5p	LOC550930	6mer	550930	TGF-beta receptor type-1
ame-miR-3730-5p	LOC550930	6mer	550930	TGF-beta receptor type-1
ame-miR-3730-5p	LOC550930	6mer	550930	TGF-beta receptor type-1
ame-miR-3730-5p	LOC550930	6mer	550930	TGF-beta receptor type-1
ame-miR-3730-5p	LOC550930	6mer	550930	TGF-beta receptor type-1
ame-miR-3730-5p	LOC552549	7mer-1a	552549	ribosomal protein S6 kinase beta-1
ame-miR-3730-5p	LOC552549	7mer-1a	552549	ribosomal protein S6 kinase beta-1
ame-miR-3730-5p	LOC552549	7mer-1a	552549	ribosomal protein S6 kinase beta-1
ame-miR-3730-5p	LOC725711	7mer-1a	725711	activin receptor type-1
ame-miR-3730-5p	LOC725711	7mer-1a	725711	activin receptor type-1
ame-miR-3730-5p	LOC726999	7mer-1a	726999	iroquois-class homeodomain protein IRX-6
ame-miR-3730-5p	LOC726999	7mer-1a	726999	iroquois-class homeodomain protein IRX-6
ame-miR-3730-5p	LOC727335	7mer-1a	727335	inhibin beta chain
ame-miR-3730-5p	Emc	7mer-m8	100216325	extra macrochaetae
ame-miR-3730-5p	LOC100578446	6mer	100578446	pituitary homeobox x
ame-miR-3730-5p	LOC100578446	7mer-m8	100578446	pituitary homeobox x
ame-miR-3730-5p	LOC100578446	6mer	100578446	pituitary homeobox x
ame-miR-3730-5p	LOC100578446	7mer-m8	100578446	pituitary homeobox x
ame-miR-3730-5p	LOC100578446	6mer	100578446	pituitary homeobox x
ame-miR-3730-5p	LOC100578446	7mer-m8	100578446	pituitary homeobox x
ame-miR-3730-5p	LOC100578446	6mer	100578446	pituitary homeobox x
ame-miR-3730-5p	LOC100578446	7mer-m8	100578446	pituitary homeobox x
ame-miR-3730-5p	LOC100578446	6mer	100578446	pituitary homeobox x
ame-miR-3730-5p	LOC100578446	7mer-m8	100578446	pituitary homeobox x
ame-miR-3730-5p	LOC100578446	6mer	100578446	pituitary homeobox x
ame-miR-3730-5p	LOC100578446	7mer-m8	100578446	pituitary homeobox x
ame-miR-3730-5p	LOC100578446	6mer	100578446	pituitary homeobox x
ame-miR-3730-5p	LOC100578446	7mer-m8	100578446	pituitary homeobox x
ame-miR-3730-5p	LOC408438	6mer	408438	insulin receptor substrate 1-B
ame-miR-3730-5p	LOC408438	8mer-1a	408438	insulin receptor substrate 1-B
ame-miR-3730-5p	LOC408438	8mer-1a	408438	insulin receptor substrate 1-B
ame-miR-3730-5p	LOC408438	8mer-1a	408438	insulin receptor substrate 1-B
ame-miR-3730-5p	LOC408976	7mer-1a	408976	protein kinase shaggy
ame-miR-3730-5p	LOC408976	6mer	408976	protein kinase shaggy
ame-miR-3730-5p	LOC408976	7mer-1a	408976	protein kinase shaggy
ame-miR-3730-5p	LOC408976	6mer	408976	protein kinase shaggy
ame-miR-3730-5p	LOC408976	6mer	408976	protein kinase shaggy
ame-miR-3730-5p	LOC408976	6mer	408976	protein kinase shaggy
ame-miR-3730-5p	LOC408976	6mer	408976	protein kinase shaggy
ame-miR-3730-5p	LOC408976	6mer	408976	protein kinase shaggy
ame-miR-3730-5p	LOC408976	6mer	408976	protein kinase shaggy
ame-miR-3730-5p	LOC408976	6mer	408976	protein kinase shaggy
ame-miR-3730-5p	LOC408976	6mer	408976	protein kinase shaggy
ame-miR-3730-5p	LOC408976	6mer	408976	protein kinase shaggy
ame-miR-3730-5p	LOC408976	6mer	408976	protein kinase shaggy
ame-miR-3730-5p	LOC408976	6mer	408976	protein kinase shaggy
ame-miR-3730-5p	LOC408976	7mer-1a	408976	protein kinase shaggy
ame-miR-3730-5p	LOC408976	6mer	408976	protein kinase shaggy
ame-miR-3730-5p	LOC408976	7mer-1a	408976	protein kinase shaggy
ame-miR-3730-5p	LOC408976	7mer-1a	408976	protein kinase shaggy
ame-miR-3730-5p	LOC408976	6mer	408976	protein kinase shaggy
ame-miR-3730-5p	LOC408976	7mer-1a	408976	protein kinase shaggy
ame-miR-3730-5p	LOC408976	6mer	408976	protein kinase shaggy
ame-miR-3730-5p	LOC408976	6mer	408976	protein kinase shaggy
ame-miR-3730-5p	LOC408976	6mer	408976	protein kinase shaggy
ame-miR-3730-5p	LOC408976	7mer-1a	408976	protein kinase shaggy
ame-miR-3730-5p	LOC408976	6mer	408976	protein kinase shaggy
ame-miR-3730-5p	LOC408976	7mer-1a	408976	protein kinase shaggy
ame-miR-3730-5p	LOC408976	7mer-1a	408976	protein kinase shaggy
ame-miR-3730-5p	LOC408976	6mer	408976	protein kinase shaggy
ame-miR-3730-5p	LOC408976	7mer-1a	408976	protein kinase shaggy
ame-miR-3730-5p	LOC408976	6mer	408976	protein kinase shaggy
ame-miR-3730-5p	LOC408976	6mer	408976	protein kinase shaggy
ame-miR-3730-5p	LOC408976	6mer	408976	protein kinase shaggy
ame-miR-3730-5p	LOC408976	7mer-1a	408976	protein kinase shaggy
ame-miR-3730-5p	LOC408976	6mer	408976	protein kinase shaggy
ame-miR-3730-5p	LOC408976	7mer-1a	408976	protein kinase shaggy
ame-miR-3730-5p	LOC408976	7mer-1a	408976	protein kinase shaggy
ame-miR-3730-5p	LOC408976	6mer	408976	protein kinase shaggy
ame-miR-3730-5p	LOC408976	7mer-1a	408976	protein kinase shaggy
ame-miR-3730-5p	LOC408976	6mer	408976	protein kinase shaggy
ame-miR-3730-5p	LOC408976	6mer	408976	protein kinase shaggy
ame-miR-3730-5p	LOC408976	7mer-1a	408976	protein kinase shaggy
ame-miR-3730-5p	LOC408976	6mer	408976	protein kinase shaggy
ame-miR-3730-5p	LOC408976	7mer-1a	408976	protein kinase shaggy
ame-miR-3730-5p	LOC408976	7mer-1a	408976	protein kinase shaggy
ame-miR-3730-5p	LOC408976	6mer	408976	protein kinase shaggy
ame-miR-3730-5p	LOC408976	7mer-1a	408976	protein kinase shaggy
ame-miR-3730-5p	LOC408976	7mer-1a	408976	protein kinase shaggy
ame-miR-3730-5p	LOC408976	6mer	408976	protein kinase shaggy
ame-miR-3730-5p	LOC408976	7mer-1a	408976	protein kinase shaggy
ame-miR-3730-5p	LOC408976	6mer	408976	protein kinase shaggy
ame-miR-3730-5p	LOC408976	6mer	408976	protein kinase shaggy
ame-miR-3730-5p	LOC408976	6mer	408976	protein kinase shaggy
ame-miR-3730-5p	LOC408976	7mer-1a	408976	protein kinase shaggy
ame-miR-3730-5p	LOC408976	6mer	408976	protein kinase shaggy
ame-miR-3730-5p	LOC408976	7mer-1a	408976	protein kinase shaggy
ame-miR-3730-5p	LOC408976	6mer	408976	protein kinase shaggy
ame-miR-3730-5p	LOC408976	6mer	408976	protein kinase shaggy
ame-miR-3730-5p	LOC408976	6mer	408976	protein kinase shaggy
ame-miR-3730-5p	LOC409393	6mer	409393	serine/threonine-protein kinase mTOR
ame-miR-3730-5p	LOC409393	6mer	409393	serine/threonine-protein kinase mTOR
ame-miR-3730-5p	LOC409702	6mer	409702	folliculin-interacting protein 2
ame-miR-3730-5p	LOC409702	7mer-1a	409702	folliculin-interacting protein 2
ame-miR-3730-5p	LOC409925	6mer	409925	dual specificity mitogen-activated protein kinase kinase dSOR1
ame-miR-3730-5p	LOC410345	6mer	410345	GATOR complex protein WDR59
ame-miR-3730-5p	LOC410345	6mer	410345	GATOR complex protein WDR59
ame-miR-3730-5p	LOC410345	6mer	410345	GATOR complex protein WDR59
ame-miR-3730-5p	LOC410345	6mer	410345	GATOR complex protein WDR59
ame-miR-3730-5p	LOC411297	8mer-1a	411297	insulin-like peptide receptor
ame-miR-3730-5p	LOC411297	7mer-m8	411297	insulin-like peptide receptor
ame-miR-3730-5p	LOC411297	6mer	411297	insulin-like peptide receptor
ame-miR-3730-5p	LOC411297	8mer-1a	411297	insulin-like peptide receptor
ame-miR-3730-5p	LOC411297	7mer-m8	411297	insulin-like peptide receptor
ame-miR-3730-5p	LOC411297	8mer-1a	411297	insulin-like peptide receptor
ame-miR-3730-5p	LOC411297	7mer-m8	411297	insulin-like peptide receptor
ame-miR-3730-5p	LOC411297	8mer-1a	411297	insulin-like peptide receptor
ame-miR-3730-5p	LOC411297	7mer-m8	411297	insulin-like peptide receptor
ame-miR-3730-5p	LOC411481	7mer-1a	411481	ribosomal protein S6 kinase alpha-2
ame-miR-3730-5p	LOC411481	7mer-1a	411481	ribosomal protein S6 kinase alpha-2
ame-miR-3730-5p	LOC411935	7mer-1a	411935	large neutral amino acids transporter small subunit 2
ame-miR-3730-5p	LOC412031	6mer	412031	S-phase kinase-associated protein 2
ame-miR-3730-5p	LOC412031	6mer	412031	S-phase kinase-associated protein 2
ame-miR-3730-5p	LOC412031	6mer	412031	S-phase kinase-associated protein 2
ame-miR-3730-5p	LOC412031	6mer	412031	S-phase kinase-associated protein 2
ame-miR-3730-5p	LOC412031	6mer	412031	S-phase kinase-associated protein 2
ame-miR-3730-5p	LOC412278	8mer-1a	412278	tuberin
ame-miR-3730-5p	LOC412278	8mer-1a	412278	tuberin
ame-miR-3730-5p	LOC551093	7mer-m8	551093	V-type proton ATPase catalytic subunit A
ame-miR-3730-5p	LOC551093	7mer-m8	551093	V-type proton ATPase catalytic subunit A
ame-miR-3730-5p	LOC551093	7mer-m8	551093	V-type proton ATPase catalytic subunit A
ame-miR-3730-5p	LOC551093	6mer	551093	V-type proton ATPase catalytic subunit A
ame-miR-3730-5p	LOC551512	6mer	551512	uncharacterized LOC551512
ame-miR-3730-5p	LOC552381	7mer-1a	552381	neutral and basic amino acid transport protein rBAT
ame-miR-3730-5p	LOC552381	7mer-1a	552381	neutral and basic amino acid transport protein rBAT
ame-miR-3730-5p	LOC552476	6mer	552476	V-type proton ATPase subunit F
ame-miR-3730-5p	LOC725647	6mer	725647	40S ribosomal protein S6
ame-miR-3730-5p	InR-2	6mer	725827	insulin-like receptor-like
ame-miR-3730-5p	InR-2	6mer	725827	insulin-like receptor-like
ame-miR-3730-5p	InR-2	6mer	725827	insulin-like receptor-like
ame-miR-3730-5p	InR-2	6mer	725827	insulin-like receptor-like
ame-miR-3730-5p	InR-2	6mer	725827	insulin-like receptor-like
ame-miR-3730-5p	InR-2	6mer	725827	insulin-like receptor-like
ame-miR-3730-5p	InR-2	6mer	725827	insulin-like receptor-like
ame-miR-3730-5p	InR-2	6mer	725827	insulin-like receptor-like
ame-miR-3730-5p	InR-2	6mer	725827	insulin-like receptor-like
ame-miR-3730-5p	InR-2	6mer	725827	insulin-like receptor-like
ame-miR-3730-5p	InR-2	6mer	725827	insulin-like receptor-like
ame-miR-3730-5p	LOC727159	6mer	727159	CAP-Gly domain-containing linker protein 1
ame-miR-3730-5p	LOC727159	6mer	727159	CAP-Gly domain-containing linker protein 1
ame-miR-3730-5p	LOC727159	6mer	727159	CAP-Gly domain-containing linker protein 1
ame-miR-3730-5p	LOC727159	6mer	727159	CAP-Gly domain-containing linker protein 1
ame-miR-3730-5p	LOC727159	6mer	727159	CAP-Gly domain-containing linker protein 1
ame-miR-3730-5p	LOC727159	6mer	727159	CAP-Gly domain-containing linker protein 1
ame-miR-3730-5p	LOC727159	6mer	727159	CAP-Gly domain-containing linker protein 1
ame-miR-3730-5p	LOC727159	6mer	727159	CAP-Gly domain-containing linker protein 1
ame-miR-3730-5p	LOC727159	6mer	727159	CAP-Gly domain-containing linker protein 1
ame-miR-3730-5p	LOC727159	6mer	727159	CAP-Gly domain-containing linker protein 1
ame-miR-3730-5p	LOC727159	6mer	727159	CAP-Gly domain-containing linker protein 1
ame-miR-3730-5p	LOC727159	6mer	727159	CAP-Gly domain-containing linker protein 1

## Sheet: ame-mir-3730_RNAhybrid
gene_id	gene_desc	gene_symbol	target	target_length	miRNA	miRNA_length	mfe	p-value
408399	armadillo segment polarity protein	arm	NM_001185105.1	3075	ame-miR-3730-5p	23	-25.5 kcal/mol	0.52941
408399	armadillo segment polarity protein	arm	NM_001185105.1	3075	ame-miR-3730-5p	23	-23.7 kcal/mol	0.840246
408399	armadillo segment polarity protein	arm	NM_001185105.1	3075	ame-miR-3730-5p	23	-23.2 kcal/mol	0.904442
408399	armadillo segment polarity protein	arm	NM_001185105.1	3075	ame-miR-3730-5p	23	-22.8 kcal/mol	0.94279
408399	armadillo segment polarity protein	arm	NM_001185105.1	3075	ame-miR-3730-5p	23	-22.3 kcal/mol	0.974336
408399	armadillo segment polarity protein	arm	NM_001185105.1	3075	ame-miR-3730-5p	23	-22.3 kcal/mol	0.974336
408399	armadillo segment polarity protein	arm	NM_001185105.1	3075	ame-miR-3730-5p	23	-22.0 kcal/mol	0.985704
408399	armadillo segment polarity protein	arm	NM_001185105.1	3075	ame-miR-3730-5p	23	-22.0 kcal/mol	0.985704
408399	armadillo segment polarity protein	arm	NM_001185105.1	3075	ame-miR-3730-5p	23	-21.7 kcal/mol	0.992747
408399	armadillo segment polarity protein	arm	NM_001185105.1	3075	ame-miR-3730-5p	23	-21.5 kcal/mol	0.995652
408399	armadillo segment polarity protein	arm	NM_001185105.1	3075	ame-miR-3730-5p	23	-21.4 kcal/mol	0.996698
408399	armadillo segment polarity protein	arm	NM_001185105.1	3075	ame-miR-3730-5p	23	-21.2 kcal/mol	0.998176
408399	armadillo segment polarity protein	arm	NM_001185105.1	3075	ame-miR-3730-5p	23	-21.0 kcal/mol	0.999052
408399	armadillo segment polarity protein	arm	NM_001185105.1	3075	ame-miR-3730-5p	23	-20.6 kcal/mol	0.999793
408399	armadillo segment polarity protein	arm	NM_001185105.1	3075	ame-miR-3730-5p	23	-20.6 kcal/mol	0.999793
408399	armadillo segment polarity protein	arm	XM_006557800.3	3626	ame-miR-3730-5p	23	-25.5 kcal/mol	0.595602
408399	armadillo segment polarity protein	arm	XM_006557800.3	3626	ame-miR-3730-5p	23	-24.9 kcal/mol	0.702543
408399	armadillo segment polarity protein	arm	XM_006557800.3	3626	ame-miR-3730-5p	23	-24.1 kcal/mol	0.833017
408399	armadillo segment polarity protein	arm	XM_006557800.3	3626	ame-miR-3730-5p	23	-23.7 kcal/mol	0.886353
408399	armadillo segment polarity protein	arm	XM_006557800.3	3626	ame-miR-3730-5p	23	-23.2 kcal/mol	0.937588
408399	armadillo segment polarity protein	arm	XM_006557800.3	3626	ame-miR-3730-5p	23	-22.3 kcal/mol	0.986421
408399	armadillo segment polarity protein	arm	XM_006557800.3	3626	ame-miR-3730-5p	23	-22.3 kcal/mol	0.986421
408399	armadillo segment polarity protein	arm	XM_006557800.3	3626	ame-miR-3730-5p	23	-22.0 kcal/mol	0.993094
408399	armadillo segment polarity protein	arm	XM_006557800.3	3626	ame-miR-3730-5p	23	-22.0 kcal/mol	0.993094
408399	armadillo segment polarity protein	arm	XM_006557800.3	3626	ame-miR-3730-5p	23	-21.7 kcal/mol	0.996842
408399	armadillo segment polarity protein	arm	XM_006557800.3	3626	ame-miR-3730-5p	23	-21.6 kcal/mol	0.99763
408399	armadillo segment polarity protein	arm	XM_006557800.3	3626	ame-miR-3730-5p	23	-21.5 kcal/mol	0.998247
408399	armadillo segment polarity protein	arm	XM_006557800.3	3626	ame-miR-3730-5p	23	-21.5 kcal/mol	0.998247
408399	armadillo segment polarity protein	arm	XM_006557800.3	3626	ame-miR-3730-5p	23	-21.5 kcal/mol	0.998247
408399	armadillo segment polarity protein	arm	XM_006557800.3	3626	ame-miR-3730-5p	23	-21.4 kcal/mol	0.998723
408399	armadillo segment polarity protein	arm	XM_006557800.3	3626	ame-miR-3730-5p	23	-21.3 kcal/mol	0.999084
408399	armadillo segment polarity protein	arm	XM_006557800.3	3626	ame-miR-3730-5p	23	-21.2 kcal/mol	0.999354
408399	armadillo segment polarity protein	arm	XM_006557800.3	3626	ame-miR-3730-5p	23	-21.0 kcal/mol	0.999695
408399	armadillo segment polarity protein	arm	XM_006557800.3	3626	ame-miR-3730-5p	23	-20.6 kcal/mol	0.999947
408399	armadillo segment polarity protein	arm	XM_006557800.3	3626	ame-miR-3730-5p	23	-20.6 kcal/mol	0.999947
408399	armadillo segment polarity protein	arm	XM_006557801.1	3831	ame-miR-3730-5p	23	-25.5 kcal/mol	0.617605
408399	armadillo segment polarity protein	arm	XM_006557801.1	3831	ame-miR-3730-5p	23	-25.4 kcal/mol	0.635424
408399	armadillo segment polarity protein	arm	XM_006557801.1	3831	ame-miR-3730-5p	23	-24.9 kcal/mol	0.723514
408399	armadillo segment polarity protein	arm	XM_006557801.1	3831	ame-miR-3730-5p	23	-24.2 kcal/mol	0.835465
408399	armadillo segment polarity protein	arm	XM_006557801.1	3831	ame-miR-3730-5p	23	-24.1 kcal/mol	0.849564
408399	armadillo segment polarity protein	arm	XM_006557801.1	3831	ame-miR-3730-5p	23	-23.7 kcal/mol	0.89967
408399	armadillo segment polarity protein	arm	XM_006557801.1	3831	ame-miR-3730-5p	23	-23.6 kcal/mol	0.910492
408399	armadillo segment polarity protein	arm	XM_006557801.1	3831	ame-miR-3730-5p	23	-23.4 kcal/mol	0.92998
408399	armadillo segment polarity protein	arm	XM_006557801.1	3831	ame-miR-3730-5p	23	-23.2 kcal/mol	0.946577
408399	armadillo segment polarity protein	arm	XM_006557801.1	3831	ame-miR-3730-5p	23	-22.3 kcal/mol	0.989227
408399	armadillo segment polarity protein	arm	XM_006557801.1	3831	ame-miR-3730-5p	23	-22.0 kcal/mol	0.994697
408399	armadillo segment polarity protein	arm	XM_006557801.1	3831	ame-miR-3730-5p	23	-21.7 kcal/mol	0.997663
408399	armadillo segment polarity protein	arm	XM_006557801.1	3831	ame-miR-3730-5p	23	-21.6 kcal/mol	0.99827
408399	armadillo segment polarity protein	arm	XM_006557801.1	3831	ame-miR-3730-5p	23	-21.5 kcal/mol	0.998739
408399	armadillo segment polarity protein	arm	XM_006557801.1	3831	ame-miR-3730-5p	23	-21.5 kcal/mol	0.998739
408399	armadillo segment polarity protein	arm	XM_006557801.1	3831	ame-miR-3730-5p	23	-21.5 kcal/mol	0.998739
408399	armadillo segment polarity protein	arm	XM_006557801.1	3831	ame-miR-3730-5p	23	-21.4 kcal/mol	0.999094
408399	armadillo segment polarity protein	arm	XM_006557801.1	3831	ame-miR-3730-5p	23	-21.3 kcal/mol	0.999361
408399	armadillo segment polarity protein	arm	XM_006557801.1	3831	ame-miR-3730-5p	23	-21.2 kcal/mol	0.999556
408399	armadillo segment polarity protein	arm	XM_006557801.1	3831	ame-miR-3730-5p	23	-21.2 kcal/mol	0.999556
408399	armadillo segment polarity protein	arm	XM_006557801.1	3831	ame-miR-3730-5p	23	-21.0 kcal/mol	0.999798
408399	armadillo segment polarity protein	arm	XM_006557801.1	3831	ame-miR-3730-5p	23	-20.6 kcal/mol	0.999967
408399	armadillo segment polarity protein	arm	XM_006557801.1	3831	ame-miR-3730-5p	23	-20.6 kcal/mol	0.999967
408399	armadillo segment polarity protein	arm	XM_016915645.1	3326	ame-miR-3730-5p	23	-25.5 kcal/mol	0.560899
408399	armadillo segment polarity protein	arm	XM_016915645.1	3326	ame-miR-3730-5p	23	-24.9 kcal/mol	0.668691
408399	armadillo segment polarity protein	arm	XM_016915645.1	3326	ame-miR-3730-5p	23	-24.1 kcal/mol	0.805172
408399	armadillo segment polarity protein	arm	XM_016915645.1	3326	ame-miR-3730-5p	23	-23.7 kcal/mol	0.863339
408399	armadillo segment polarity protein	arm	XM_016915645.1	3326	ame-miR-3730-5p	23	-23.2 kcal/mol	0.92141
408399	armadillo segment polarity protein	arm	XM_016915645.1	3326	ame-miR-3730-5p	23	-22.3 kcal/mol	0.980847
408399	armadillo segment polarity protein	arm	XM_016915645.1	3326	ame-miR-3730-5p	23	-22.0 kcal/mol	0.98977
408399	armadillo segment polarity protein	arm	XM_016915645.1	3326	ame-miR-3730-5p	23	-21.7 kcal/mol	0.995053
408399	armadillo segment polarity protein	arm	XM_016915645.1	3326	ame-miR-3730-5p	23	-21.6 kcal/mol	0.996212
408399	armadillo segment polarity protein	arm	XM_016915645.1	3326	ame-miR-3730-5p	23	-21.5 kcal/mol	0.997138
408399	armadillo segment polarity protein	arm	XM_016915645.1	3326	ame-miR-3730-5p	23	-21.5 kcal/mol	0.997138
408399	armadillo segment polarity protein	arm	XM_016915645.1	3326	ame-miR-3730-5p	23	-21.5 kcal/mol	0.997138
408399	armadillo segment polarity protein	arm	XM_016915645.1	3326	ame-miR-3730-5p	23	-21.4 kcal/mol	0.997868
408399	armadillo segment polarity protein	arm	XM_016915645.1	3326	ame-miR-3730-5p	23	-21.3 kcal/mol	0.998435
408399	armadillo segment polarity protein	arm	XM_016915645.1	3326	ame-miR-3730-5p	23	-21.2 kcal/mol	0.998869
408399	armadillo segment polarity protein	arm	XM_016915645.1	3326	ame-miR-3730-5p	23	-21.0 kcal/mol	0.999438
408399	armadillo segment polarity protein	arm	XM_016915645.1	3326	ame-miR-3730-5p	23	-20.6 kcal/mol	0.999889
408399	armadillo segment polarity protein	arm	XM_016915645.1	3326	ame-miR-3730-5p	23	-20.6 kcal/mol	0.999889
408691	RING-box protein 1A	LOC408691	XM_016910739.1	945	ame-miR-3730-5p	23	-21.8 kcal/mol	0.731169
408691	RING-box protein 1A	LOC408691	XM_016910739.1	945	ame-miR-3730-5p	23	-21.1 kcal/mol	0.855404
408691	RING-box protein 1A	LOC408691	XM_016910740.2	857	ame-miR-3730-5p	23	-21.1 kcal/mol	0.821538
408791	1-phosphatidylinositol 4,5-bisphosphate phosphodiesterase classes I and II	LOC408791	XM_003250942.4	5384	ame-miR-3730-5p	23	-24.0 kcal/mol	0.938346
408791	1-phosphatidylinositol 4,5-bisphosphate phosphodiesterase classes I and II	LOC408791	XM_003250942.4	5384	ame-miR-3730-5p	23	-23.6 kcal/mol	0.965371
408791	1-phosphatidylinositol 4,5-bisphosphate phosphodiesterase classes I and II	LOC408791	XM_003250942.4	5384	ame-miR-3730-5p	23	-23.2 kcal/mol	0.98274
408791	1-phosphatidylinositol 4,5-bisphosphate phosphodiesterase classes I and II	LOC408791	XM_003250942.4	5384	ame-miR-3730-5p	23	-22.5 kcal/mol	0.996456
408791	1-phosphatidylinositol 4,5-bisphosphate phosphodiesterase classes I and II	LOC408791	XM_003250942.4	5384	ame-miR-3730-5p	23	-22.1 kcal/mol	0.998898
408791	1-phosphatidylinositol 4,5-bisphosphate phosphodiesterase classes I and II	LOC408791	XM_003250942.4	5384	ame-miR-3730-5p	23	-21.3 kcal/mol	0.999951
408791	1-phosphatidylinositol 4,5-bisphosphate phosphodiesterase classes I and II	LOC408791	XM_003250942.4	5384	ame-miR-3730-5p	23	-20.7 kcal/mol	0.999998
408791	1-phosphatidylinositol 4,5-bisphosphate phosphodiesterase classes I and II	LOC408791	XM_003250942.4	5384	ame-miR-3730-5p	23	-20.6 kcal/mol	0.999999
408791	1-phosphatidylinositol 4,5-bisphosphate phosphodiesterase classes I and II	LOC408791	XM_003250943.4	5555	ame-miR-3730-5p	23	-22.1 kcal/mol	0.99909
408791	1-phosphatidylinositol 4,5-bisphosphate phosphodiesterase classes I and II	LOC408791	XM_003250943.4	5555	ame-miR-3730-5p	23	-21.3 kcal/mol	0.999962
408791	1-phosphatidylinositol 4,5-bisphosphate phosphodiesterase classes I and II	LOC408791	XM_003250943.4	5555	ame-miR-3730-5p	23	-21.1 kcal/mol	0.999986
408791	1-phosphatidylinositol 4,5-bisphosphate phosphodiesterase classes I and II	LOC408791	XM_003250943.4	5555	ame-miR-3730-5p	23	-21.0 kcal/mol	0.999992
408791	1-phosphatidylinositol 4,5-bisphosphate phosphodiesterase classes I and II	LOC408791	XM_003250943.4	5555	ame-miR-3730-5p	23	-20.7 kcal/mol	0.999999
408791	1-phosphatidylinositol 4,5-bisphosphate phosphodiesterase classes I and II	LOC408791	XM_006567225.3	5429	ame-miR-3730-5p	23	-24.0 kcal/mol	0.939712
408791	1-phosphatidylinositol 4,5-bisphosphate phosphodiesterase classes I and II	LOC408791	XM_006567225.3	5429	ame-miR-3730-5p	23	-23.6 kcal/mol	0.966279
408791	1-phosphatidylinositol 4,5-bisphosphate phosphodiesterase classes I and II	LOC408791	XM_006567225.3	5429	ame-miR-3730-5p	23	-23.2 kcal/mol	0.983276
408791	1-phosphatidylinositol 4,5-bisphosphate phosphodiesterase classes I and II	LOC408791	XM_006567225.3	5429	ame-miR-3730-5p	23	-22.5 kcal/mol	0.996603
408791	1-phosphatidylinositol 4,5-bisphosphate phosphodiesterase classes I and II	LOC408791	XM_006567225.3	5429	ame-miR-3730-5p	23	-22.1 kcal/mol	0.998952
408791	1-phosphatidylinositol 4,5-bisphosphate phosphodiesterase classes I and II	LOC408791	XM_006567225.3	5429	ame-miR-3730-5p	23	-21.3 kcal/mol	0.999954
408791	1-phosphatidylinositol 4,5-bisphosphate phosphodiesterase classes I and II	LOC408791	XM_006567225.3	5429	ame-miR-3730-5p	23	-20.7 kcal/mol	0.999998
408791	1-phosphatidylinositol 4,5-bisphosphate phosphodiesterase classes I and II	LOC408791	XM_006567225.3	5429	ame-miR-3730-5p	23	-20.6 kcal/mol	0.999999
408791	1-phosphatidylinositol 4,5-bisphosphate phosphodiesterase classes I and II	LOC408791	XM_006567226.3	5411	ame-miR-3730-5p	23	-24.0 kcal/mol	0.939169
408791	1-phosphatidylinositol 4,5-bisphosphate phosphodiesterase classes I and II	LOC408791	XM_006567226.3	5411	ame-miR-3730-5p	23	-23.6 kcal/mol	0.965919
408791	1-phosphatidylinositol 4,5-bisphosphate phosphodiesterase classes I and II	LOC408791	XM_006567226.3	5411	ame-miR-3730-5p	23	-23.2 kcal/mol	0.983063
408791	1-phosphatidylinositol 4,5-bisphosphate phosphodiesterase classes I and II	LOC408791	XM_006567226.3	5411	ame-miR-3730-5p	23	-22.5 kcal/mol	0.996545
408791	1-phosphatidylinositol 4,5-bisphosphate phosphodiesterase classes I and II	LOC408791	XM_006567226.3	5411	ame-miR-3730-5p	23	-22.1 kcal/mol	0.998931
408791	1-phosphatidylinositol 4,5-bisphosphate phosphodiesterase classes I and II	LOC408791	XM_006567226.3	5411	ame-miR-3730-5p	23	-21.3 kcal/mol	0.999953
408791	1-phosphatidylinositol 4,5-bisphosphate phosphodiesterase classes I and II	LOC408791	XM_006567226.3	5411	ame-miR-3730-5p	23	-20.7 kcal/mol	0.999998
408791	1-phosphatidylinositol 4,5-bisphosphate phosphodiesterase classes I and II	LOC408791	XM_006567226.3	5411	ame-miR-3730-5p	23	-20.6 kcal/mol	0.999999
408791	1-phosphatidylinositol 4,5-bisphosphate phosphodiesterase classes I and II	LOC408791	XM_016911760.2	5226	ame-miR-3730-5p	23	-22.1 kcal/mol	0.998683
408791	1-phosphatidylinositol 4,5-bisphosphate phosphodiesterase classes I and II	LOC408791	XM_016911760.2	5226	ame-miR-3730-5p	23	-21.3 kcal/mol	0.999937
408791	1-phosphatidylinositol 4,5-bisphosphate phosphodiesterase classes I and II	LOC408791	XM_016911760.2	5226	ame-miR-3730-5p	23	-21.1 kcal/mol	0.999976
408791	1-phosphatidylinositol 4,5-bisphosphate phosphodiesterase classes I and II	LOC408791	XM_016911760.2	5226	ame-miR-3730-5p	23	-20.7 kcal/mol	0.999997
408791	1-phosphatidylinositol 4,5-bisphosphate phosphodiesterase classes I and II	LOC408791	XM_026440433.1	5439	ame-miR-3730-5p	23	-22.1 kcal/mol	0.998964
408791	1-phosphatidylinositol 4,5-bisphosphate phosphodiesterase classes I and II	LOC408791	XM_026440433.1	5439	ame-miR-3730-5p	23	-21.3 kcal/mol	0.999955
408791	1-phosphatidylinositol 4,5-bisphosphate phosphodiesterase classes I and II	LOC408791	XM_026440433.1	5439	ame-miR-3730-5p	23	-21.1 kcal/mol	0.999983
408791	1-phosphatidylinositol 4,5-bisphosphate phosphodiesterase classes I and II	LOC408791	XM_026440433.1	5439	ame-miR-3730-5p	23	-20.7 kcal/mol	0.999998
408890	protein groucho	LOC408890	XM_006565410.3	6111	ame-miR-3730-5p	23	-27.8 kcal/mol	0.415055
408890	protein groucho	LOC408890	XM_006565410.3	6111	ame-miR-3730-5p	23	-26.2 kcal/mol	0.676688
408890	protein groucho	LOC408890	XM_006565410.3	6111	ame-miR-3730-5p	23	-25.5 kcal/mol	0.790698
408890	protein groucho	LOC408890	XM_006565410.3	6111	ame-miR-3730-5p	23	-25.0 kcal/mol	0.861063
408890	protein groucho	LOC408890	XM_006565410.3	6111	ame-miR-3730-5p	23	-22.5 kcal/mol	0.998197
408890	protein groucho	LOC408890	XM_006565410.3	6111	ame-miR-3730-5p	23	-22.4 kcal/mol	0.998665
408890	protein groucho	LOC408890	XM_006565410.3	6111	ame-miR-3730-5p	23	-22.3 kcal/mol	0.999026
408890	protein groucho	LOC408890	XM_006565410.3	6111	ame-miR-3730-5p	23	-22.2 kcal/mol	0.9993
408890	protein groucho	LOC408890	XM_006565410.3	6111	ame-miR-3730-5p	23	-21.9 kcal/mol	0.999764
408890	protein groucho	LOC408890	XM_006565410.3	6111	ame-miR-3730-5p	23	-21.7 kcal/mol	0.999896
408890	protein groucho	LOC408890	XM_006565410.3	6111	ame-miR-3730-5p	23	-21.4 kcal/mol	0.999974
408890	protein groucho	LOC408890	XM_006565410.3	6111	ame-miR-3730-5p	23	-21.4 kcal/mol	0.999974
408890	protein groucho	LOC408890	XM_006565410.3	6111	ame-miR-3730-5p	23	-21.3 kcal/mol	0.999984
408890	protein groucho	LOC408890	XM_006565410.3	6111	ame-miR-3730-5p	23	-21.3 kcal/mol	0.999984
408890	protein groucho	LOC408890	XM_006565410.3	6111	ame-miR-3730-5p	23	-21.2 kcal/mol	0.999991
408890	protein groucho	LOC408890	XM_006565410.3	6111	ame-miR-3730-5p	23	-21.1 kcal/mol	0.999995
408890	protein groucho	LOC408890	XM_006565410.3	6111	ame-miR-3730-5p	23	-21.0 kcal/mol	0.999997
408890	protein groucho	LOC408890	XM_006565410.3	6111	ame-miR-3730-5p	23	-20.8 kcal/mol	0.999999
408890	protein groucho	LOC408890	XM_006565410.3	6111	ame-miR-3730-5p	23	-20.7 kcal/mol	1
408890	protein groucho	LOC408890	XM_006565410.3	6111	ame-miR-3730-5p	23	-20.6 kcal/mol	1
408890	protein groucho	LOC408890	XM_006565410.3	6111	ame-miR-3730-5p	23	-20.3 kcal/mol	1
408890	protein groucho	LOC408890	XM_006565410.3	6111	ame-miR-3730-5p	23	-20.1 kcal/mol	1
408890	protein groucho	LOC408890	XM_006565411.3	5328	ame-miR-3730-5p	23	-27.8 kcal/mol	0.36928
408890	protein groucho	LOC408890	XM_006565411.3	5328	ame-miR-3730-5p	23	-26.2 kcal/mol	0.624306
408890	protein groucho	LOC408890	XM_006565411.3	5328	ame-miR-3730-5p	23	-25.5 kcal/mol	0.74364
408890	protein groucho	LOC408890	XM_006565411.3	5328	ame-miR-3730-5p	23	-25.0 kcal/mol	0.821378
408890	protein groucho	LOC408890	XM_006565411.3	5328	ame-miR-3730-5p	23	-22.5 kcal/mol	0.996263
408890	protein groucho	LOC408890	XM_006565411.3	5328	ame-miR-3730-5p	23	-22.4 kcal/mol	0.997145
408890	protein groucho	LOC408890	XM_006565411.3	5328	ame-miR-3730-5p	23	-22.3 kcal/mol	0.997848
408890	protein groucho	LOC408890	XM_006565411.3	5328	ame-miR-3730-5p	23	-22.2 kcal/mol	0.998399
408890	protein groucho	LOC408890	XM_006565411.3	5328	ame-miR-3730-5p	23	-21.9 kcal/mol	0.999397
408890	protein groucho	LOC408890	XM_006565411.3	5328	ame-miR-3730-5p	23	-21.4 kcal/mol	0.999916
408890	protein groucho	LOC408890	XM_006565411.3	5328	ame-miR-3730-5p	23	-21.4 kcal/mol	0.999916
408890	protein groucho	LOC408890	XM_006565411.3	5328	ame-miR-3730-5p	23	-21.3 kcal/mol	0.999946
408890	protein groucho	LOC408890	XM_006565411.3	5328	ame-miR-3730-5p	23	-21.1 kcal/mol	0.99998
408890	protein groucho	LOC408890	XM_006565411.3	5328	ame-miR-3730-5p	23	-20.8 kcal/mol	0.999996
408890	protein groucho	LOC408890	XM_006565411.3	5328	ame-miR-3730-5p	23	-20.6 kcal/mol	0.999999
408890	protein groucho	LOC408890	XM_006565411.3	5328	ame-miR-3730-5p	23	-20.3 kcal/mol	1
408890	protein groucho	LOC408890	XM_006565411.3	5328	ame-miR-3730-5p	23	-20.1 kcal/mol	1
408890	protein groucho	LOC408890	XM_392421.7	6129	ame-miR-3730-5p	23	-27.8 kcal/mol	0.416063
408890	protein groucho	LOC408890	XM_392421.7	6129	ame-miR-3730-5p	23	-26.2 kcal/mol	0.677792
408890	protein groucho	LOC408890	XM_392421.7	6129	ame-miR-3730-5p	23	-25.5 kcal/mol	0.791661
408890	protein groucho	LOC408890	XM_392421.7	6129	ame-miR-3730-5p	23	-25.0 kcal/mol	0.861854
408890	protein groucho	LOC408890	XM_392421.7	6129	ame-miR-3730-5p	23	-22.5 kcal/mol	0.998226
408890	protein groucho	LOC408890	XM_392421.7	6129	ame-miR-3730-5p	23	-22.4 kcal/mol	0.998688
408890	protein groucho	LOC408890	XM_392421.7	6129	ame-miR-3730-5p	23	-22.3 kcal/mol	0.999044
408890	protein groucho	LOC408890	XM_392421.7	6129	ame-miR-3730-5p	23	-22.2 kcal/mol	0.999313
408890	protein groucho	LOC408890	XM_392421.7	6129	ame-miR-3730-5p	23	-21.9 kcal/mol	0.999769
408890	protein groucho	LOC408890	XM_392421.7	6129	ame-miR-3730-5p	23	-21.7 kcal/mol	0.999898
408890	protein groucho	LOC408890	XM_392421.7	6129	ame-miR-3730-5p	23	-21.4 kcal/mol	0.999974
408890	protein groucho	LOC408890	XM_392421.7	6129	ame-miR-3730-5p	23	-21.4 kcal/mol	0.999974
408890	protein groucho	LOC408890	XM_392421.7	6129	ame-miR-3730-5p	23	-21.3 kcal/mol	0.999984
408890	protein groucho	LOC408890	XM_392421.7	6129	ame-miR-3730-5p	23	-21.3 kcal/mol	0.999984
408890	protein groucho	LOC408890	XM_392421.7	6129	ame-miR-3730-5p	23	-21.2 kcal/mol	0.999991
408890	protein groucho	LOC408890	XM_392421.7	6129	ame-miR-3730-5p	23	-21.1 kcal/mol	0.999995
408890	protein groucho	LOC408890	XM_392421.7	6129	ame-miR-3730-5p	23	-21.0 kcal/mol	0.999997
408890	protein groucho	LOC408890	XM_392421.7	6129	ame-miR-3730-5p	23	-20.8 kcal/mol	0.999999
408890	protein groucho	LOC408890	XM_392421.7	6129	ame-miR-3730-5p	23	-20.7 kcal/mol	1
408890	protein groucho	LOC408890	XM_392421.7	6129	ame-miR-3730-5p	23	-20.6 kcal/mol	1
408890	protein groucho	LOC408890	XM_392421.7	6129	ame-miR-3730-5p	23	-20.3 kcal/mol	1
408890	protein groucho	LOC408890	XM_392421.7	6129	ame-miR-3730-5p	23	-20.1 kcal/mol	1
408894	transducin-like enhancer protein 3	LOC408894	XM_006564127.3	3905	ame-miR-3730-5p	23	-27.7 kcal/mol	0.287262
408894	transducin-like enhancer protein 3	LOC408894	XM_006564127.3	3905	ame-miR-3730-5p	23	-27.2 kcal/mol	0.350328
408894	transducin-like enhancer protein 3	LOC408894	XM_006564127.3	3905	ame-miR-3730-5p	23	-27.0 kcal/mol	0.378172
408894	transducin-like enhancer protein 3	LOC408894	XM_006564127.3	3905	ame-miR-3730-5p	23	-22.5 kcal/mol	0.984826
408894	transducin-like enhancer protein 3	LOC408894	XM_006564127.3	3905	ame-miR-3730-5p	23	-21.6 kcal/mol	0.998455
408894	transducin-like enhancer protein 3	LOC408894	XM_006564127.3	3905	ame-miR-3730-5p	23	-21.2 kcal/mol	0.999612
408894	transducin-like enhancer protein 3	LOC408894	XM_006564127.3	3905	ame-miR-3730-5p	23	-21.1 kcal/mol	0.999737
408894	transducin-like enhancer protein 3	LOC408894	XM_006564127.3	3905	ame-miR-3730-5p	23	-20.9 kcal/mol	0.999886
408894	transducin-like enhancer protein 3	LOC408894	XM_006564127.3	3905	ame-miR-3730-5p	23	-20.8 kcal/mol	0.999927
408894	transducin-like enhancer protein 3	LOC408894	XM_006564127.3	3905	ame-miR-3730-5p	23	-20.7 kcal/mol	0.999955
408894	transducin-like enhancer protein 3	LOC408894	XM_006564127.3	3905	ame-miR-3730-5p	23	-20.7 kcal/mol	0.999955
408894	transducin-like enhancer protein 3	LOC408894	XM_006564127.3	3905	ame-miR-3730-5p	23	-20.6 kcal/mol	0.999972
408894	transducin-like enhancer protein 3	LOC408894	XM_006564127.3	3905	ame-miR-3730-5p	23	-20.4 kcal/mol	0.999991
408894	transducin-like enhancer protein 3	LOC408894	XM_006564127.3	3905	ame-miR-3730-5p	23	-20.3 kcal/mol	0.999995
408894	transducin-like enhancer protein 3	LOC408894	XM_006564127.3	3905	ame-miR-3730-5p	23	-20.3 kcal/mol	0.999995
408894	transducin-like enhancer protein 3	LOC408894	XM_006564127.3	3905	ame-miR-3730-5p	23	-20.3 kcal/mol	0.999995
408894	transducin-like enhancer protein 3	LOC408894	XM_006564127.3	3905	ame-miR-3730-5p	23	-20.2 kcal/mol	0.999997
408894	transducin-like enhancer protein 3	LOC408894	XM_006564127.3	3905	ame-miR-3730-5p	23	-20.0 kcal/mol	0.999999
408894	transducin-like enhancer protein 3	LOC408894	XM_006564128.3	3893	ame-miR-3730-5p	23	-27.7 kcal/mol	0.28639
408894	transducin-like enhancer protein 3	LOC408894	XM_006564128.3	3893	ame-miR-3730-5p	23	-27.2 kcal/mol	0.349334
408894	transducin-like enhancer protein 3	LOC408894	XM_006564128.3	3893	ame-miR-3730-5p	23	-27.0 kcal/mol	0.377132
408894	transducin-like enhancer protein 3	LOC408894	XM_006564128.3	3893	ame-miR-3730-5p	23	-22.5 kcal/mol	0.984638
408894	transducin-like enhancer protein 3	LOC408894	XM_006564128.3	3893	ame-miR-3730-5p	23	-21.6 kcal/mol	0.998426
408894	transducin-like enhancer protein 3	LOC408894	XM_006564128.3	3893	ame-miR-3730-5p	23	-21.2 kcal/mol	0.999603
408894	transducin-like enhancer protein 3	LOC408894	XM_006564128.3	3893	ame-miR-3730-5p	23	-21.1 kcal/mol	0.999731
408894	transducin-like enhancer protein 3	LOC408894	XM_006564128.3	3893	ame-miR-3730-5p	23	-20.9 kcal/mol	0.999883
408894	transducin-like enhancer protein 3	LOC408894	XM_006564128.3	3893	ame-miR-3730-5p	23	-20.8 kcal/mol	0.999925
408894	transducin-like enhancer protein 3	LOC408894	XM_006564128.3	3893	ame-miR-3730-5p	23	-20.7 kcal/mol	0.999954
408894	transducin-like enhancer protein 3	LOC408894	XM_006564128.3	3893	ame-miR-3730-5p	23	-20.7 kcal/mol	0.999954
408894	transducin-like enhancer protein 3	LOC408894	XM_006564128.3	3893	ame-miR-3730-5p	23	-20.6 kcal/mol	0.999972
408894	transducin-like enhancer protein 3	LOC408894	XM_006564128.3	3893	ame-miR-3730-5p	23	-20.4 kcal/mol	0.99999
408894	transducin-like enhancer protein 3	LOC408894	XM_006564128.3	3893	ame-miR-3730-5p	23	-20.3 kcal/mol	0.999994
408894	transducin-like enhancer protein 3	LOC408894	XM_006564128.3	3893	ame-miR-3730-5p	23	-20.3 kcal/mol	0.999994
408894	transducin-like enhancer protein 3	LOC408894	XM_006564128.3	3893	ame-miR-3730-5p	23	-20.3 kcal/mol	0.999994
408894	transducin-like enhancer protein 3	LOC408894	XM_006564128.3	3893	ame-miR-3730-5p	23	-20.2 kcal/mol	0.999997
408894	transducin-like enhancer protein 3	LOC408894	XM_006564128.3	3893	ame-miR-3730-5p	23	-20.0 kcal/mol	0.999999
408894	transducin-like enhancer protein 3	LOC408894	XM_006564129.3	3893	ame-miR-3730-5p	23	-27.7 kcal/mol	0.28639
408894	transducin-like enhancer protein 3	LOC408894	XM_006564129.3	3893	ame-miR-3730-5p	23	-27.2 kcal/mol	0.349334
408894	transducin-like enhancer protein 3	LOC408894	XM_006564129.3	3893	ame-miR-3730-5p	23	-27.0 kcal/mol	0.377132
408894	transducin-like enhancer protein 3	LOC408894	XM_006564129.3	3893	ame-miR-3730-5p	23	-22.5 kcal/mol	0.984638
408894	transducin-like enhancer protein 3	LOC408894	XM_006564129.3	3893	ame-miR-3730-5p	23	-21.6 kcal/mol	0.998426
408894	transducin-like enhancer protein 3	LOC408894	XM_006564129.3	3893	ame-miR-3730-5p	23	-21.2 kcal/mol	0.999603
408894	transducin-like enhancer protein 3	LOC408894	XM_006564129.3	3893	ame-miR-3730-5p	23	-21.1 kcal/mol	0.999731
408894	transducin-like enhancer protein 3	LOC408894	XM_006564129.3	3893	ame-miR-3730-5p	23	-20.9 kcal/mol	0.999883
408894	transducin-like enhancer protein 3	LOC408894	XM_006564129.3	3893	ame-miR-3730-5p	23	-20.8 kcal/mol	0.999925
408894	transducin-like enhancer protein 3	LOC408894	XM_006564129.3	3893	ame-miR-3730-5p	23	-20.7 kcal/mol	0.999954
408894	transducin-like enhancer protein 3	LOC408894	XM_006564129.3	3893	ame-miR-3730-5p	23	-20.7 kcal/mol	0.999954
408894	transducin-like enhancer protein 3	LOC408894	XM_006564129.3	3893	ame-miR-3730-5p	23	-20.6 kcal/mol	0.999972
408894	transducin-like enhancer protein 3	LOC408894	XM_006564129.3	3893	ame-miR-3730-5p	23	-20.4 kcal/mol	0.99999
408894	transducin-like enhancer protein 3	LOC408894	XM_006564129.3	3893	ame-miR-3730-5p	23	-20.3 kcal/mol	0.999994
408894	transducin-like enhancer protein 3	LOC408894	XM_006564129.3	3893	ame-miR-3730-5p	23	-20.3 kcal/mol	0.999994
408894	transducin-like enhancer protein 3	LOC408894	XM_006564129.3	3893	ame-miR-3730-5p	23	-20.3 kcal/mol	0.999994
408894	transducin-like enhancer protein 3	LOC408894	XM_006564129.3	3893	ame-miR-3730-5p	23	-20.2 kcal/mol	0.999997
408894	transducin-like enhancer protein 3	LOC408894	XM_006564129.3	3893	ame-miR-3730-5p	23	-20.0 kcal/mol	0.999999
408894	transducin-like enhancer protein 3	LOC408894	XM_006564131.3	3686	ame-miR-3730-5p	23	-27.7 kcal/mol	0.271184
408894	transducin-like enhancer protein 3	LOC408894	XM_006564131.3	3686	ame-miR-3730-5p	23	-27.2 kcal/mol	0.331938
408894	transducin-like enhancer protein 3	LOC408894	XM_006564131.3	3686	ame-miR-3730-5p	23	-27.0 kcal/mol	0.358895
408894	transducin-like enhancer protein 3	LOC408894	XM_006564131.3	3686	ame-miR-3730-5p	23	-22.5 kcal/mol	0.980987
408894	transducin-like enhancer protein 3	LOC408894	XM_006564131.3	3686	ame-miR-3730-5p	23	-21.6 kcal/mol	0.99784
408894	transducin-like enhancer protein 3	LOC408894	XM_006564131.3	3686	ame-miR-3730-5p	23	-20.9 kcal/mol	0.999821
408894	transducin-like enhancer protein 3	LOC408894	XM_006564131.3	3686	ame-miR-3730-5p	23	-20.8 kcal/mol	0.999883
408894	transducin-like enhancer protein 3	LOC408894	XM_006564131.3	3686	ame-miR-3730-5p	23	-20.7 kcal/mol	0.999926
408894	transducin-like enhancer protein 3	LOC408894	XM_006564131.3	3686	ame-miR-3730-5p	23	-20.7 kcal/mol	0.999926
408894	transducin-like enhancer protein 3	LOC408894	XM_006564131.3	3686	ame-miR-3730-5p	23	-20.6 kcal/mol	0.999954
408894	transducin-like enhancer protein 3	LOC408894	XM_006564131.3	3686	ame-miR-3730-5p	23	-20.4 kcal/mol	0.999983
408894	transducin-like enhancer protein 3	LOC408894	XM_006564131.3	3686	ame-miR-3730-5p	23	-20.3 kcal/mol	0.99999
408894	transducin-like enhancer protein 3	LOC408894	XM_006564131.3	3686	ame-miR-3730-5p	23	-20.3 kcal/mol	0.99999
408894	transducin-like enhancer protein 3	LOC408894	XM_006564131.3	3686	ame-miR-3730-5p	23	-20.0 kcal/mol	0.999998
408894	transducin-like enhancer protein 3	LOC408894	XM_006564132.3	3545	ame-miR-3730-5p	23	-27.7 kcal/mol	0.260646
408894	transducin-like enhancer protein 3	LOC408894	XM_006564132.3	3545	ame-miR-3730-5p	23	-27.0 kcal/mol	0.346155
408894	transducin-like enhancer protein 3	LOC408894	XM_006564132.3	3545	ame-miR-3730-5p	23	-22.5 kcal/mol	0.977983
408894	transducin-like enhancer protein 3	LOC408894	XM_006564132.3	3545	ame-miR-3730-5p	23	-21.6 kcal/mol	0.997313
408894	transducin-like enhancer protein 3	LOC408894	XM_006564132.3	3545	ame-miR-3730-5p	23	-21.2 kcal/mol	0.999249
408894	transducin-like enhancer protein 3	LOC408894	XM_006564132.3	3545	ame-miR-3730-5p	23	-21.1 kcal/mol	0.999476
408894	transducin-like enhancer protein 3	LOC408894	XM_006564132.3	3545	ame-miR-3730-5p	23	-20.9 kcal/mol	0.999758
408894	transducin-like enhancer protein 3	LOC408894	XM_006564132.3	3545	ame-miR-3730-5p	23	-20.8 kcal/mol	0.999841
408894	transducin-like enhancer protein 3	LOC408894	XM_006564132.3	3545	ame-miR-3730-5p	23	-20.7 kcal/mol	0.999897
408894	transducin-like enhancer protein 3	LOC408894	XM_006564132.3	3545	ame-miR-3730-5p	23	-20.4 kcal/mol	0.999976
408894	transducin-like enhancer protein 3	LOC408894	XM_006564132.3	3545	ame-miR-3730-5p	23	-20.3 kcal/mol	0.999986
408894	transducin-like enhancer protein 3	LOC408894	XM_006564132.3	3545	ame-miR-3730-5p	23	-20.3 kcal/mol	0.999986
408894	transducin-like enhancer protein 3	LOC408894	XM_006564132.3	3545	ame-miR-3730-5p	23	-20.3 kcal/mol	0.999986
408894	transducin-like enhancer protein 3	LOC408894	XM_006564132.3	3545	ame-miR-3730-5p	23	-20.2 kcal/mol	0.999992
408894	transducin-like enhancer protein 3	LOC408894	XM_006564132.3	3545	ame-miR-3730-5p	23	-20.0 kcal/mol	0.999998
408894	transducin-like enhancer protein 3	LOC408894	XM_016912629.2	3277	ame-miR-3730-5p	23	-27.2 kcal/mol	0.296164
408894	transducin-like enhancer protein 3	LOC408894	XM_016912629.2	3277	ame-miR-3730-5p	23	-27.0 kcal/mol	0.321225
408894	transducin-like enhancer protein 3	LOC408894	XM_016912629.2	3277	ame-miR-3730-5p	23	-22.5 kcal/mol	0.970805
408894	transducin-like enhancer protein 3	LOC408894	XM_016912629.2	3277	ame-miR-3730-5p	23	-21.2 kcal/mol	0.998759
408894	transducin-like enhancer protein 3	LOC408894	XM_016912629.2	3277	ame-miR-3730-5p	23	-21.1 kcal/mol	0.999114
408894	transducin-like enhancer protein 3	LOC408894	XM_016912629.2	3277	ame-miR-3730-5p	23	-20.9 kcal/mol	0.999571
408894	transducin-like enhancer protein 3	LOC408894	XM_016912629.2	3277	ame-miR-3730-5p	23	-20.8 kcal/mol	0.99971
408894	transducin-like enhancer protein 3	LOC408894	XM_016912629.2	3277	ame-miR-3730-5p	23	-20.7 kcal/mol	0.999807
408894	transducin-like enhancer protein 3	LOC408894	XM_016912629.2	3277	ame-miR-3730-5p	23	-20.6 kcal/mol	0.999875
408894	transducin-like enhancer protein 3	LOC408894	XM_016912629.2	3277	ame-miR-3730-5p	23	-20.4 kcal/mol	0.999951
408894	transducin-like enhancer protein 3	LOC408894	XM_016912629.2	3277	ame-miR-3730-5p	23	-20.3 kcal/mol	0.99997
408894	transducin-like enhancer protein 3	LOC408894	XM_016912629.2	3277	ame-miR-3730-5p	23	-20.3 kcal/mol	0.99997
408894	transducin-like enhancer protein 3	LOC408894	XM_016912629.2	3277	ame-miR-3730-5p	23	-20.2 kcal/mol	0.999982
408894	transducin-like enhancer protein 3	LOC408894	XM_016912629.2	3277	ame-miR-3730-5p	23	-20.0 kcal/mol	0.999994
408894	transducin-like enhancer protein 3	LOC408894	XM_026441319.1	3722	ame-miR-3730-5p	23	-27.7 kcal/mol	0.273851
408894	transducin-like enhancer protein 3	LOC408894	XM_026441319.1	3722	ame-miR-3730-5p	23	-27.2 kcal/mol	0.334997
408894	transducin-like enhancer protein 3	LOC408894	XM_026441319.1	3722	ame-miR-3730-5p	23	-27.0 kcal/mol	0.362106
408894	transducin-like enhancer protein 3	LOC408894	XM_026441319.1	3722	ame-miR-3730-5p	23	-22.5 kcal/mol	0.981683
408894	transducin-like enhancer protein 3	LOC408894	XM_026441319.1	3722	ame-miR-3730-5p	23	-21.6 kcal/mol	0.997956
408894	transducin-like enhancer protein 3	LOC408894	XM_026441319.1	3722	ame-miR-3730-5p	23	-21.2 kcal/mol	0.999458
408894	transducin-like enhancer protein 3	LOC408894	XM_026441319.1	3722	ame-miR-3730-5p	23	-21.1 kcal/mol	0.999628
408894	transducin-like enhancer protein 3	LOC408894	XM_026441319.1	3722	ame-miR-3730-5p	23	-20.9 kcal/mol	0.999834
408894	transducin-like enhancer protein 3	LOC408894	XM_026441319.1	3722	ame-miR-3730-5p	23	-20.8 kcal/mol	0.999892
408894	transducin-like enhancer protein 3	LOC408894	XM_026441319.1	3722	ame-miR-3730-5p	23	-20.7 kcal/mol	0.999931
408894	transducin-like enhancer protein 3	LOC408894	XM_026441319.1	3722	ame-miR-3730-5p	23	-20.7 kcal/mol	0.999931
408894	transducin-like enhancer protein 3	LOC408894	XM_026441319.1	3722	ame-miR-3730-5p	23	-20.6 kcal/mol	0.999958
408894	transducin-like enhancer protein 3	LOC408894	XM_026441319.1	3722	ame-miR-3730-5p	23	-20.4 kcal/mol	0.999985
408894	transducin-like enhancer protein 3	LOC408894	XM_026441319.1	3722	ame-miR-3730-5p	23	-20.3 kcal/mol	0.999991
408894	transducin-like enhancer protein 3	LOC408894	XM_026441319.1	3722	ame-miR-3730-5p	23	-20.3 kcal/mol	0.999991
408894	transducin-like enhancer protein 3	LOC408894	XM_026441319.1	3722	ame-miR-3730-5p	23	-20.3 kcal/mol	0.999991
408894	transducin-like enhancer protein 3	LOC408894	XM_026441319.1	3722	ame-miR-3730-5p	23	-20.2 kcal/mol	0.999995
408894	transducin-like enhancer protein 3	LOC408894	XM_026441319.1	3722	ame-miR-3730-5p	23	-20.0 kcal/mol	0.999999
408894	transducin-like enhancer protein 3	LOC408894	XM_026441320.1	3798	ame-miR-3730-5p	23	-27.7 kcal/mol	0.279451
408894	transducin-like enhancer protein 3	LOC408894	XM_026441320.1	3798	ame-miR-3730-5p	23	-27.2 kcal/mol	0.341409
408894	transducin-like enhancer protein 3	LOC408894	XM_026441320.1	3798	ame-miR-3730-5p	23	-27.0 kcal/mol	0.368831
408894	transducin-like enhancer protein 3	LOC408894	XM_026441320.1	3798	ame-miR-3730-5p	23	-22.5 kcal/mol	0.983064
408894	transducin-like enhancer protein 3	LOC408894	XM_026441320.1	3798	ame-miR-3730-5p	23	-21.6 kcal/mol	0.998181
408894	transducin-like enhancer protein 3	LOC408894	XM_026441320.1	3798	ame-miR-3730-5p	23	-21.2 kcal/mol	0.999529
408894	transducin-like enhancer protein 3	LOC408894	XM_026441320.1	3798	ame-miR-3730-5p	23	-21.1 kcal/mol	0.999678
408894	transducin-like enhancer protein 3	LOC408894	XM_026441320.1	3798	ame-miR-3730-5p	23	-20.9 kcal/mol	0.999858
408894	transducin-like enhancer protein 3	LOC408894	XM_026441320.1	3798	ame-miR-3730-5p	23	-20.8 kcal/mol	0.999909
408894	transducin-like enhancer protein 3	LOC408894	XM_026441320.1	3798	ame-miR-3730-5p	23	-20.7 kcal/mol	0.999942
408894	transducin-like enhancer protein 3	LOC408894	XM_026441320.1	3798	ame-miR-3730-5p	23	-20.7 kcal/mol	0.999942
408894	transducin-like enhancer protein 3	LOC408894	XM_026441320.1	3798	ame-miR-3730-5p	23	-20.6 kcal/mol	0.999965
408894	transducin-like enhancer protein 3	LOC408894	XM_026441320.1	3798	ame-miR-3730-5p	23	-20.4 kcal/mol	0.999987
408894	transducin-like enhancer protein 3	LOC408894	XM_026441320.1	3798	ame-miR-3730-5p	23	-20.3 kcal/mol	0.999993
408894	transducin-like enhancer protein 3	LOC408894	XM_026441320.1	3798	ame-miR-3730-5p	23	-20.3 kcal/mol	0.999993
408894	transducin-like enhancer protein 3	LOC408894	XM_026441320.1	3798	ame-miR-3730-5p	23	-20.3 kcal/mol	0.999993
408894	transducin-like enhancer protein 3	LOC408894	XM_026441320.1	3798	ame-miR-3730-5p	23	-20.2 kcal/mol	0.999996
408894	transducin-like enhancer protein 3	LOC408894	XM_026441320.1	3798	ame-miR-3730-5p	23	-20.0 kcal/mol	0.999999
408894	transducin-like enhancer protein 3	LOC408894	XM_026441322.1	3710	ame-miR-3730-5p	23	-27.7 kcal/mol	0.272963
408894	transducin-like enhancer protein 3	LOC408894	XM_026441322.1	3710	ame-miR-3730-5p	23	-27.2 kcal/mol	0.333979
408894	transducin-like enhancer protein 3	LOC408894	XM_026441322.1	3710	ame-miR-3730-5p	23	-27.0 kcal/mol	0.361038
408894	transducin-like enhancer protein 3	LOC408894	XM_026441322.1	3710	ame-miR-3730-5p	23	-22.5 kcal/mol	0.981454
408894	transducin-like enhancer protein 3	LOC408894	XM_026441322.1	3710	ame-miR-3730-5p	23	-21.6 kcal/mol	0.997918
408894	transducin-like enhancer protein 3	LOC408894	XM_026441322.1	3710	ame-miR-3730-5p	23	-21.2 kcal/mol	0.999446
408894	transducin-like enhancer protein 3	LOC408894	XM_026441322.1	3710	ame-miR-3730-5p	23	-21.1 kcal/mol	0.999619
408894	transducin-like enhancer protein 3	LOC408894	XM_026441322.1	3710	ame-miR-3730-5p	23	-20.9 kcal/mol	0.999829
408894	transducin-like enhancer protein 3	LOC408894	XM_026441322.1	3710	ame-miR-3730-5p	23	-20.8 kcal/mol	0.999889
408894	transducin-like enhancer protein 3	LOC408894	XM_026441322.1	3710	ame-miR-3730-5p	23	-20.7 kcal/mol	0.99993
408894	transducin-like enhancer protein 3	LOC408894	XM_026441322.1	3710	ame-miR-3730-5p	23	-20.7 kcal/mol	0.99993
408894	transducin-like enhancer protein 3	LOC408894	XM_026441322.1	3710	ame-miR-3730-5p	23	-20.6 kcal/mol	0.999956
408894	transducin-like enhancer protein 3	LOC408894	XM_026441322.1	3710	ame-miR-3730-5p	23	-20.4 kcal/mol	0.999984
408894	transducin-like enhancer protein 3	LOC408894	XM_026441322.1	3710	ame-miR-3730-5p	23	-20.3 kcal/mol	0.999991
408894	transducin-like enhancer protein 3	LOC408894	XM_026441322.1	3710	ame-miR-3730-5p	23	-20.3 kcal/mol	0.999991
408894	transducin-like enhancer protein 3	LOC408894	XM_026441322.1	3710	ame-miR-3730-5p	23	-20.3 kcal/mol	0.999991
408894	transducin-like enhancer protein 3	LOC408894	XM_026441322.1	3710	ame-miR-3730-5p	23	-20.2 kcal/mol	0.999995
408894	transducin-like enhancer protein 3	LOC408894	XM_026441322.1	3710	ame-miR-3730-5p	23	-20.0 kcal/mol	0.999999
408894	transducin-like enhancer protein 3	LOC408894	XM_026441323.1	3786	ame-miR-3730-5p	23	-27.7 kcal/mol	0.278569
408894	transducin-like enhancer protein 3	LOC408894	XM_026441323.1	3786	ame-miR-3730-5p	23	-27.2 kcal/mol	0.340401
408894	transducin-like enhancer protein 3	LOC408894	XM_026441323.1	3786	ame-miR-3730-5p	23	-27.0 kcal/mol	0.367774
408894	transducin-like enhancer protein 3	LOC408894	XM_026441323.1	3786	ame-miR-3730-5p	23	-22.5 kcal/mol	0.982854
408894	transducin-like enhancer protein 3	LOC408894	XM_026441323.1	3786	ame-miR-3730-5p	23	-21.6 kcal/mol	0.998147
408894	transducin-like enhancer protein 3	LOC408894	XM_026441323.1	3786	ame-miR-3730-5p	23	-21.2 kcal/mol	0.999518
408894	transducin-like enhancer protein 3	LOC408894	XM_026441323.1	3786	ame-miR-3730-5p	23	-21.1 kcal/mol	0.99967
408894	transducin-like enhancer protein 3	LOC408894	XM_026441323.1	3786	ame-miR-3730-5p	23	-20.9 kcal/mol	0.999854
408894	transducin-like enhancer protein 3	LOC408894	XM_026441323.1	3786	ame-miR-3730-5p	23	-20.8 kcal/mol	0.999906
408894	transducin-like enhancer protein 3	LOC408894	XM_026441323.1	3786	ame-miR-3730-5p	23	-20.7 kcal/mol	0.999941
408894	transducin-like enhancer protein 3	LOC408894	XM_026441323.1	3786	ame-miR-3730-5p	23	-20.7 kcal/mol	0.999941
408894	transducin-like enhancer protein 3	LOC408894	XM_026441323.1	3786	ame-miR-3730-5p	23	-20.6 kcal/mol	0.999963
408894	transducin-like enhancer protein 3	LOC408894	XM_026441323.1	3786	ame-miR-3730-5p	23	-20.4 kcal/mol	0.999987
408894	transducin-like enhancer protein 3	LOC408894	XM_026441323.1	3786	ame-miR-3730-5p	23	-20.3 kcal/mol	0.999993
408894	transducin-like enhancer protein 3	LOC408894	XM_026441323.1	3786	ame-miR-3730-5p	23	-20.3 kcal/mol	0.999993
408894	transducin-like enhancer protein 3	LOC408894	XM_026441323.1	3786	ame-miR-3730-5p	23	-20.3 kcal/mol	0.999993
408894	transducin-like enhancer protein 3	LOC408894	XM_026441323.1	3786	ame-miR-3730-5p	23	-20.2 kcal/mol	0.999996
408894	transducin-like enhancer protein 3	LOC408894	XM_026441323.1	3786	ame-miR-3730-5p	23	-20.0 kcal/mol	0.999999
408894	transducin-like enhancer protein 3	LOC408894	XM_026441324.1	3265	ame-miR-3730-5p	23	-27.2 kcal/mol	0.295086
408894	transducin-like enhancer protein 3	LOC408894	XM_026441324.1	3265	ame-miR-3730-5p	23	-27.0 kcal/mol	0.320086
408894	transducin-like enhancer protein 3	LOC408894	XM_026441324.1	3265	ame-miR-3730-5p	23	-22.5 kcal/mol	0.97043
408894	transducin-like enhancer protein 3	LOC408894	XM_026441324.1	3265	ame-miR-3730-5p	23	-21.2 kcal/mol	0.998731
408894	transducin-like enhancer protein 3	LOC408894	XM_026441324.1	3265	ame-miR-3730-5p	23	-21.1 kcal/mol	0.999093
408894	transducin-like enhancer protein 3	LOC408894	XM_026441324.1	3265	ame-miR-3730-5p	23	-20.9 kcal/mol	0.99956
408894	transducin-like enhancer protein 3	LOC408894	XM_026441324.1	3265	ame-miR-3730-5p	23	-20.8 kcal/mol	0.999702
408894	transducin-like enhancer protein 3	LOC408894	XM_026441324.1	3265	ame-miR-3730-5p	23	-20.7 kcal/mol	0.999802
408894	transducin-like enhancer protein 3	LOC408894	XM_026441324.1	3265	ame-miR-3730-5p	23	-20.6 kcal/mol	0.999871
408894	transducin-like enhancer protein 3	LOC408894	XM_026441324.1	3265	ame-miR-3730-5p	23	-20.4 kcal/mol	0.999949
408894	transducin-like enhancer protein 3	LOC408894	XM_026441324.1	3265	ame-miR-3730-5p	23	-20.3 kcal/mol	0.999969
408894	transducin-like enhancer protein 3	LOC408894	XM_026441324.1	3265	ame-miR-3730-5p	23	-20.3 kcal/mol	0.999969
408894	transducin-like enhancer protein 3	LOC408894	XM_026441324.1	3265	ame-miR-3730-5p	23	-20.2 kcal/mol	0.999982
408894	transducin-like enhancer protein 3	LOC408894	XM_026441324.1	3265	ame-miR-3730-5p	23	-20.0 kcal/mol	0.999994
408894	transducin-like enhancer protein 3	LOC408894	XM_026441325.1	3533	ame-miR-3730-5p	23	-27.7 kcal/mol	0.259743
408894	transducin-like enhancer protein 3	LOC408894	XM_026441325.1	3533	ame-miR-3730-5p	23	-27.0 kcal/mol	0.345059
408894	transducin-like enhancer protein 3	LOC408894	XM_026441325.1	3533	ame-miR-3730-5p	23	-22.5 kcal/mol	0.977705
408894	transducin-like enhancer protein 3	LOC408894	XM_026441325.1	3533	ame-miR-3730-5p	23	-21.6 kcal/mol	0.997262
408894	transducin-like enhancer protein 3	LOC408894	XM_026441325.1	3533	ame-miR-3730-5p	23	-21.2 kcal/mol	0.999232
408894	transducin-like enhancer protein 3	LOC408894	XM_026441325.1	3533	ame-miR-3730-5p	23	-21.1 kcal/mol	0.999464
408894	transducin-like enhancer protein 3	LOC408894	XM_026441325.1	3533	ame-miR-3730-5p	23	-20.9 kcal/mol	0.999752
408894	transducin-like enhancer protein 3	LOC408894	XM_026441325.1	3533	ame-miR-3730-5p	23	-20.8 kcal/mol	0.999836
408894	transducin-like enhancer protein 3	LOC408894	XM_026441325.1	3533	ame-miR-3730-5p	23	-20.7 kcal/mol	0.999894
408894	transducin-like enhancer protein 3	LOC408894	XM_026441325.1	3533	ame-miR-3730-5p	23	-20.4 kcal/mol	0.999975
408894	transducin-like enhancer protein 3	LOC408894	XM_026441325.1	3533	ame-miR-3730-5p	23	-20.3 kcal/mol	0.999985
408894	transducin-like enhancer protein 3	LOC408894	XM_026441325.1	3533	ame-miR-3730-5p	23	-20.3 kcal/mol	0.999985
408894	transducin-like enhancer protein 3	LOC408894	XM_026441325.1	3533	ame-miR-3730-5p	23	-20.3 kcal/mol	0.999985
408894	transducin-like enhancer protein 3	LOC408894	XM_026441325.1	3533	ame-miR-3730-5p	23	-20.2 kcal/mol	0.999992
408894	transducin-like enhancer protein 3	LOC408894	XM_026441325.1	3533	ame-miR-3730-5p	23	-20.0 kcal/mol	0.999997
408894	transducin-like enhancer protein 3	LOC408894	XM_026441326.1	3227	ame-miR-3730-5p	23	-27.2 kcal/mol	0.291662
408894	transducin-like enhancer protein 3	LOC408894	XM_026441326.1	3227	ame-miR-3730-5p	23	-27.0 kcal/mol	0.316469
408894	transducin-like enhancer protein 3	LOC408894	XM_026441326.1	3227	ame-miR-3730-5p	23	-22.5 kcal/mol	0.969211
408894	transducin-like enhancer protein 3	LOC408894	XM_026441326.1	3227	ame-miR-3730-5p	23	-21.2 kcal/mol	0.998636
408894	transducin-like enhancer protein 3	LOC408894	XM_026441326.1	3227	ame-miR-3730-5p	23	-21.1 kcal/mol	0.999022
408894	transducin-like enhancer protein 3	LOC408894	XM_026441326.1	3227	ame-miR-3730-5p	23	-20.9 kcal/mol	0.999522
408894	transducin-like enhancer protein 3	LOC408894	XM_026441326.1	3227	ame-miR-3730-5p	23	-20.8 kcal/mol	0.999675
408894	transducin-like enhancer protein 3	LOC408894	XM_026441326.1	3227	ame-miR-3730-5p	23	-20.7 kcal/mol	0.999783
408894	transducin-like enhancer protein 3	LOC408894	XM_026441326.1	3227	ame-miR-3730-5p	23	-20.6 kcal/mol	0.999858
408894	transducin-like enhancer protein 3	LOC408894	XM_026441326.1	3227	ame-miR-3730-5p	23	-20.4 kcal/mol	0.999943
408894	transducin-like enhancer protein 3	LOC408894	XM_026441326.1	3227	ame-miR-3730-5p	23	-20.3 kcal/mol	0.999965
408894	transducin-like enhancer protein 3	LOC408894	XM_026441326.1	3227	ame-miR-3730-5p	23	-20.3 kcal/mol	0.999965
408894	transducin-like enhancer protein 3	LOC408894	XM_026441326.1	3227	ame-miR-3730-5p	23	-20.2 kcal/mol	0.999979
408894	transducin-like enhancer protein 3	LOC408894	XM_026441326.1	3227	ame-miR-3730-5p	23	-20.0 kcal/mol	0.999993
408894	transducin-like enhancer protein 3	LOC408894	XM_392425.7	3881	ame-miR-3730-5p	23	-27.7 kcal/mol	0.285517
408894	transducin-like enhancer protein 3	LOC408894	XM_392425.7	3881	ame-miR-3730-5p	23	-27.2 kcal/mol	0.348338
408894	transducin-like enhancer protein 3	LOC408894	XM_392425.7	3881	ame-miR-3730-5p	23	-27.0 kcal/mol	0.37609
408894	transducin-like enhancer protein 3	LOC408894	XM_392425.7	3881	ame-miR-3730-5p	23	-22.5 kcal/mol	0.984448
408894	transducin-like enhancer protein 3	LOC408894	XM_392425.7	3881	ame-miR-3730-5p	23	-21.6 kcal/mol	0.998397
408894	transducin-like enhancer protein 3	LOC408894	XM_392425.7	3881	ame-miR-3730-5p	23	-21.2 kcal/mol	0.999595
408894	transducin-like enhancer protein 3	LOC408894	XM_392425.7	3881	ame-miR-3730-5p	23	-21.1 kcal/mol	0.999725
408894	transducin-like enhancer protein 3	LOC408894	XM_392425.7	3881	ame-miR-3730-5p	23	-20.9 kcal/mol	0.99988
408894	transducin-like enhancer protein 3	LOC408894	XM_392425.7	3881	ame-miR-3730-5p	23	-20.8 kcal/mol	0.999924
408894	transducin-like enhancer protein 3	LOC408894	XM_392425.7	3881	ame-miR-3730-5p	23	-20.7 kcal/mol	0.999952
408894	transducin-like enhancer protein 3	LOC408894	XM_392425.7	3881	ame-miR-3730-5p	23	-20.7 kcal/mol	0.999952
408894	transducin-like enhancer protein 3	LOC408894	XM_392425.7	3881	ame-miR-3730-5p	23	-20.6 kcal/mol	0.999971
408894	transducin-like enhancer protein 3	LOC408894	XM_392425.7	3881	ame-miR-3730-5p	23	-20.4 kcal/mol	0.99999
408894	transducin-like enhancer protein 3	LOC408894	XM_392425.7	3881	ame-miR-3730-5p	23	-20.3 kcal/mol	0.999994
408894	transducin-like enhancer protein 3	LOC408894	XM_392425.7	3881	ame-miR-3730-5p	23	-20.3 kcal/mol	0.999994
408894	transducin-like enhancer protein 3	LOC408894	XM_392425.7	3881	ame-miR-3730-5p	23	-20.3 kcal/mol	0.999994
408894	transducin-like enhancer protein 3	LOC408894	XM_392425.7	3881	ame-miR-3730-5p	23	-20.2 kcal/mol	0.999997
408894	transducin-like enhancer protein 3	LOC408894	XM_392425.7	3881	ame-miR-3730-5p	23	-20.0 kcal/mol	0.999999
408996	1-phosphatidylinositol 4,5-bisphosphate phosphodiesterase	LOC408996	XM_026442726.1	4294	ame-miR-3730-5p	23	-25.1 kcal/mol	0.731924
408996	1-phosphatidylinositol 4,5-bisphosphate phosphodiesterase	LOC408996	XM_026442726.1	4294	ame-miR-3730-5p	23	-24.9 kcal/mol	0.765204
408996	1-phosphatidylinositol 4,5-bisphosphate phosphodiesterase	LOC408996	XM_026442726.1	4294	ame-miR-3730-5p	23	-24.7 kcal/mol	0.797079
408996	1-phosphatidylinositol 4,5-bisphosphate phosphodiesterase	LOC408996	XM_026442726.1	4294	ame-miR-3730-5p	23	-23.7 kcal/mol	0.923976
408996	1-phosphatidylinositol 4,5-bisphosphate phosphodiesterase	LOC408996	XM_026442726.1	4294	ame-miR-3730-5p	23	-23.6 kcal/mol	0.933017
408996	1-phosphatidylinositol 4,5-bisphosphate phosphodiesterase	LOC408996	XM_026442726.1	4294	ame-miR-3730-5p	23	-23.1 kcal/mol	0.967808
408996	1-phosphatidylinositol 4,5-bisphosphate phosphodiesterase	LOC408996	XM_026442726.1	4294	ame-miR-3730-5p	23	-22.3 kcal/mol	0.993547
408996	1-phosphatidylinositol 4,5-bisphosphate phosphodiesterase	LOC408996	XM_026442726.1	4294	ame-miR-3730-5p	23	-21.9 kcal/mol	0.997779
408996	1-phosphatidylinositol 4,5-bisphosphate phosphodiesterase	LOC408996	XM_026442726.1	4294	ame-miR-3730-5p	23	-21.6 kcal/mol	0.999137
408996	1-phosphatidylinositol 4,5-bisphosphate phosphodiesterase	LOC408996	XM_026442726.1	4294	ame-miR-3730-5p	23	-21.5 kcal/mol	0.99939
408996	1-phosphatidylinositol 4,5-bisphosphate phosphodiesterase	LOC408996	XM_026442726.1	4294	ame-miR-3730-5p	23	-21.5 kcal/mol	0.99939
408996	1-phosphatidylinositol 4,5-bisphosphate phosphodiesterase	LOC408996	XM_026442726.1	4294	ame-miR-3730-5p	23	-21.5 kcal/mol	0.99939
408996	1-phosphatidylinositol 4,5-bisphosphate phosphodiesterase	LOC408996	XM_026442726.1	4294	ame-miR-3730-5p	23	-21.5 kcal/mol	0.99939
408996	1-phosphatidylinositol 4,5-bisphosphate phosphodiesterase	LOC408996	XM_026442726.1	4294	ame-miR-3730-5p	23	-21.4 kcal/mol	0.999576
408996	1-phosphatidylinositol 4,5-bisphosphate phosphodiesterase	LOC408996	XM_026442726.1	4294	ame-miR-3730-5p	23	-21.4 kcal/mol	0.999576
408996	1-phosphatidylinositol 4,5-bisphosphate phosphodiesterase	LOC408996	XM_026442726.1	4294	ame-miR-3730-5p	23	-21.2 kcal/mol	0.999806
408996	1-phosphatidylinositol 4,5-bisphosphate phosphodiesterase	LOC408996	XM_026442726.1	4294	ame-miR-3730-5p	23	-20.7 kcal/mol	0.999981
408996	1-phosphatidylinositol 4,5-bisphosphate phosphodiesterase	LOC408996	XM_026442726.1	4294	ame-miR-3730-5p	23	-20.3 kcal/mol	0.999998
408996	1-phosphatidylinositol 4,5-bisphosphate phosphodiesterase	LOC408996	XM_026442726.1	4294	ame-miR-3730-5p	23	-20.0 kcal/mol	1
408996	1-phosphatidylinositol 4,5-bisphosphate phosphodiesterase	LOC408996	XM_026442726.1	4294	ame-miR-3730-5p	23	-20.0 kcal/mol	1
408996	1-phosphatidylinositol 4,5-bisphosphate phosphodiesterase	LOC408996	XM_026442727.1	4169	ame-miR-3730-5p	23	-25.1 kcal/mol	0.720929
408996	1-phosphatidylinositol 4,5-bisphosphate phosphodiesterase	LOC408996	XM_026442727.1	4169	ame-miR-3730-5p	23	-24.9 kcal/mol	0.754668
408996	1-phosphatidylinositol 4,5-bisphosphate phosphodiesterase	LOC408996	XM_026442727.1	4169	ame-miR-3730-5p	23	-24.7 kcal/mol	0.787116
408996	1-phosphatidylinositol 4,5-bisphosphate phosphodiesterase	LOC408996	XM_026442727.1	4169	ame-miR-3730-5p	23	-23.7 kcal/mol	0.918108
408996	1-phosphatidylinositol 4,5-bisphosphate phosphodiesterase	LOC408996	XM_026442727.1	4169	ame-miR-3730-5p	23	-23.6 kcal/mol	0.927606
408996	1-phosphatidylinositol 4,5-bisphosphate phosphodiesterase	LOC408996	XM_026442727.1	4169	ame-miR-3730-5p	23	-23.1 kcal/mol	0.96454
408996	1-phosphatidylinositol 4,5-bisphosphate phosphodiesterase	LOC408996	XM_026442727.1	4169	ame-miR-3730-5p	23	-22.3 kcal/mol	0.9926
408996	1-phosphatidylinositol 4,5-bisphosphate phosphodiesterase	LOC408996	XM_026442727.1	4169	ame-miR-3730-5p	23	-21.9 kcal/mol	0.997386
408996	1-phosphatidylinositol 4,5-bisphosphate phosphodiesterase	LOC408996	XM_026442727.1	4169	ame-miR-3730-5p	23	-21.6 kcal/mol	0.998961
408996	1-phosphatidylinositol 4,5-bisphosphate phosphodiesterase	LOC408996	XM_026442727.1	4169	ame-miR-3730-5p	23	-21.5 kcal/mol	0.99926
408996	1-phosphatidylinositol 4,5-bisphosphate phosphodiesterase	LOC408996	XM_026442727.1	4169	ame-miR-3730-5p	23	-21.5 kcal/mol	0.99926
408996	1-phosphatidylinositol 4,5-bisphosphate phosphodiesterase	LOC408996	XM_026442727.1	4169	ame-miR-3730-5p	23	-21.5 kcal/mol	0.99926
408996	1-phosphatidylinositol 4,5-bisphosphate phosphodiesterase	LOC408996	XM_026442727.1	4169	ame-miR-3730-5p	23	-21.5 kcal/mol	0.99926
408996	1-phosphatidylinositol 4,5-bisphosphate phosphodiesterase	LOC408996	XM_026442727.1	4169	ame-miR-3730-5p	23	-21.4 kcal/mol	0.999481
408996	1-phosphatidylinositol 4,5-bisphosphate phosphodiesterase	LOC408996	XM_026442727.1	4169	ame-miR-3730-5p	23	-21.4 kcal/mol	0.999481
408996	1-phosphatidylinositol 4,5-bisphosphate phosphodiesterase	LOC408996	XM_026442727.1	4169	ame-miR-3730-5p	23	-21.2 kcal/mol	0.999758
408996	1-phosphatidylinositol 4,5-bisphosphate phosphodiesterase	LOC408996	XM_026442727.1	4169	ame-miR-3730-5p	23	-20.7 kcal/mol	0.999975
408996	1-phosphatidylinositol 4,5-bisphosphate phosphodiesterase	LOC408996	XM_026442727.1	4169	ame-miR-3730-5p	23	-20.3 kcal/mol	0.999997
408996	1-phosphatidylinositol 4,5-bisphosphate phosphodiesterase	LOC408996	XM_026442727.1	4169	ame-miR-3730-5p	23	-20.0 kcal/mol	1
408996	1-phosphatidylinositol 4,5-bisphosphate phosphodiesterase	LOC408996	XM_026442727.1	4169	ame-miR-3730-5p	23	-20.0 kcal/mol	1
409001	disheveled-associated activator of morphogenesis 1	LOC409001	XM_006561849.3	5178	ame-miR-3730-5p	23	-25.4 kcal/mol	0.749853
409001	disheveled-associated activator of morphogenesis 1	LOC409001	XM_006561849.3	5178	ame-miR-3730-5p	23	-24.6 kcal/mol	0.867533
409001	disheveled-associated activator of morphogenesis 1	LOC409001	XM_006561849.3	5178	ame-miR-3730-5p	23	-24.0 kcal/mol	0.931654
409001	disheveled-associated activator of morphogenesis 1	LOC409001	XM_006561849.3	5178	ame-miR-3730-5p	23	-22.7 kcal/mol	0.992959
409001	disheveled-associated activator of morphogenesis 1	LOC409001	XM_006561849.3	5178	ame-miR-3730-5p	23	-22.5 kcal/mol	0.995689
409001	disheveled-associated activator of morphogenesis 1	LOC409001	XM_006561849.3	5178	ame-miR-3730-5p	23	-22.3 kcal/mol	0.997486
409001	disheveled-associated activator of morphogenesis 1	LOC409001	XM_006561849.3	5178	ame-miR-3730-5p	23	-22.2 kcal/mol	0.998117
409001	disheveled-associated activator of morphogenesis 1	LOC409001	XM_006561849.3	5178	ame-miR-3730-5p	23	-21.9 kcal/mol	0.999275
409001	disheveled-associated activator of morphogenesis 1	LOC409001	XM_006561849.3	5178	ame-miR-3730-5p	23	-21.6 kcal/mol	0.999759
409001	disheveled-associated activator of morphogenesis 1	LOC409001	XM_006561849.3	5178	ame-miR-3730-5p	23	-21.1 kcal/mol	0.999974
409001	disheveled-associated activator of morphogenesis 1	LOC409001	XM_006561849.3	5178	ame-miR-3730-5p	23	-20.8 kcal/mol	0.999995
409001	disheveled-associated activator of morphogenesis 1	LOC409001	XM_006561849.3	5178	ame-miR-3730-5p	23	-20.7 kcal/mol	0.999997
409001	disheveled-associated activator of morphogenesis 1	LOC409001	XM_006561849.3	5178	ame-miR-3730-5p	23	-20.5 kcal/mol	0.999999
409001	disheveled-associated activator of morphogenesis 1	LOC409001	XM_006561849.3	5178	ame-miR-3730-5p	23	-20.2 kcal/mol	1
409001	disheveled-associated activator of morphogenesis 1	LOC409001	XM_006561849.3	5178	ame-miR-3730-5p	23	-20.1 kcal/mol	1
409001	disheveled-associated activator of morphogenesis 1	LOC409001	XM_006561849.3	5178	ame-miR-3730-5p	23	-20.0 kcal/mol	1
409001	disheveled-associated activator of morphogenesis 1	LOC409001	XM_006561849.3	5178	ame-miR-3730-5p	23	-20.0 kcal/mol	1
409001	disheveled-associated activator of morphogenesis 1	LOC409001	XM_006561850.3	5593	ame-miR-3730-5p	23	-25.4 kcal/mol	0.776638
409001	disheveled-associated activator of morphogenesis 1	LOC409001	XM_006561850.3	5593	ame-miR-3730-5p	23	-24.6 kcal/mol	0.887098
409001	disheveled-associated activator of morphogenesis 1	LOC409001	XM_006561850.3	5593	ame-miR-3730-5p	23	-24.0 kcal/mol	0.94442
409001	disheveled-associated activator of morphogenesis 1	LOC409001	XM_006561850.3	5593	ame-miR-3730-5p	23	-22.9 kcal/mol	0.992097
409001	disheveled-associated activator of morphogenesis 1	LOC409001	XM_006561850.3	5593	ame-miR-3730-5p	23	-22.5 kcal/mol	0.997089
409001	disheveled-associated activator of morphogenesis 1	LOC409001	XM_006561850.3	5593	ame-miR-3730-5p	23	-22.3 kcal/mol	0.99836
409001	disheveled-associated activator of morphogenesis 1	LOC409001	XM_006561850.3	5593	ame-miR-3730-5p	23	-22.2 kcal/mol	0.998795
409001	disheveled-associated activator of morphogenesis 1	LOC409001	XM_006561850.3	5593	ame-miR-3730-5p	23	-21.6 kcal/mol	0.999864
409001	disheveled-associated activator of morphogenesis 1	LOC409001	XM_006561850.3	5593	ame-miR-3730-5p	23	-21.1 kcal/mol	0.999987
409001	disheveled-associated activator of morphogenesis 1	LOC409001	XM_006561850.3	5593	ame-miR-3730-5p	23	-21.0 kcal/mol	0.999992
409001	disheveled-associated activator of morphogenesis 1	LOC409001	XM_006561850.3	5593	ame-miR-3730-5p	23	-20.8 kcal/mol	0.999998
409001	disheveled-associated activator of morphogenesis 1	LOC409001	XM_006561850.3	5593	ame-miR-3730-5p	23	-20.7 kcal/mol	0.999999
409001	disheveled-associated activator of morphogenesis 1	LOC409001	XM_006561850.3	5593	ame-miR-3730-5p	23	-20.5 kcal/mol	1
409001	disheveled-associated activator of morphogenesis 1	LOC409001	XM_006561850.3	5593	ame-miR-3730-5p	23	-20.2 kcal/mol	1
409001	disheveled-associated activator of morphogenesis 1	LOC409001	XM_006561850.3	5593	ame-miR-3730-5p	23	-20.1 kcal/mol	1
409001	disheveled-associated activator of morphogenesis 1	LOC409001	XM_006561850.3	5593	ame-miR-3730-5p	23	-20.0 kcal/mol	1
409001	disheveled-associated activator of morphogenesis 1	LOC409001	XM_006561850.3	5593	ame-miR-3730-5p	23	-20.0 kcal/mol	1
409001	disheveled-associated activator of morphogenesis 1	LOC409001	XM_006561851.3	5008	ame-miR-3730-5p	23	-25.4 kcal/mol	0.737873
409001	disheveled-associated activator of morphogenesis 1	LOC409001	XM_006561851.3	5008	ame-miR-3730-5p	23	-24.6 kcal/mol	0.858478
409001	disheveled-associated activator of morphogenesis 1	LOC409001	XM_006561851.3	5008	ame-miR-3730-5p	23	-24.0 kcal/mol	0.925541
409001	disheveled-associated activator of morphogenesis 1	LOC409001	XM_006561851.3	5008	ame-miR-3730-5p	23	-22.5 kcal/mol	0.994925
409001	disheveled-associated activator of morphogenesis 1	LOC409001	XM_006561851.3	5008	ame-miR-3730-5p	23	-22.3 kcal/mol	0.996997
409001	disheveled-associated activator of morphogenesis 1	LOC409001	XM_006561851.3	5008	ame-miR-3730-5p	23	-22.2 kcal/mol	0.997733
409001	disheveled-associated activator of morphogenesis 1	LOC409001	XM_006561851.3	5008	ame-miR-3730-5p	23	-21.6 kcal/mol	0.999693
409001	disheveled-associated activator of morphogenesis 1	LOC409001	XM_006561851.3	5008	ame-miR-3730-5p	23	-21.1 kcal/mol	0.999965
409001	disheveled-associated activator of morphogenesis 1	LOC409001	XM_006561851.3	5008	ame-miR-3730-5p	23	-20.8 kcal/mol	0.999993
409001	disheveled-associated activator of morphogenesis 1	LOC409001	XM_006561851.3	5008	ame-miR-3730-5p	23	-20.8 kcal/mol	0.999993
409001	disheveled-associated activator of morphogenesis 1	LOC409001	XM_006561851.3	5008	ame-miR-3730-5p	23	-20.7 kcal/mol	0.999996
409001	disheveled-associated activator of morphogenesis 1	LOC409001	XM_006561851.3	5008	ame-miR-3730-5p	23	-20.5 kcal/mol	0.999999
409001	disheveled-associated activator of morphogenesis 1	LOC409001	XM_006561851.3	5008	ame-miR-3730-5p	23	-20.2 kcal/mol	1
409001	disheveled-associated activator of morphogenesis 1	LOC409001	XM_006561851.3	5008	ame-miR-3730-5p	23	-20.1 kcal/mol	1
409001	disheveled-associated activator of morphogenesis 1	LOC409001	XM_006561851.3	5008	ame-miR-3730-5p	23	-20.0 kcal/mol	1
409001	disheveled-associated activator of morphogenesis 1	LOC409001	XM_006561851.3	5008	ame-miR-3730-5p	23	-20.0 kcal/mol	1
409001	disheveled-associated activator of morphogenesis 1	LOC409001	XM_006561852.3	4899	ame-miR-3730-5p	23	-25.4 kcal/mol	0.729861
409001	disheveled-associated activator of morphogenesis 1	LOC409001	XM_006561852.3	4899	ame-miR-3730-5p	23	-24.6 kcal/mol	0.852319
409001	disheveled-associated activator of morphogenesis 1	LOC409001	XM_006561852.3	4899	ame-miR-3730-5p	23	-24.0 kcal/mol	0.921313
409001	disheveled-associated activator of morphogenesis 1	LOC409001	XM_006561852.3	4899	ame-miR-3730-5p	23	-22.5 kcal/mol	0.994361
409001	disheveled-associated activator of morphogenesis 1	LOC409001	XM_006561852.3	4899	ame-miR-3730-5p	23	-22.3 kcal/mol	0.996631
409001	disheveled-associated activator of morphogenesis 1	LOC409001	XM_006561852.3	4899	ame-miR-3730-5p	23	-22.2 kcal/mol	0.997445
409001	disheveled-associated activator of morphogenesis 1	LOC409001	XM_006561852.3	4899	ame-miR-3730-5p	23	-21.6 kcal/mol	0.999642
409001	disheveled-associated activator of morphogenesis 1	LOC409001	XM_006561852.3	4899	ame-miR-3730-5p	23	-21.1 kcal/mol	0.999957
409001	disheveled-associated activator of morphogenesis 1	LOC409001	XM_006561852.3	4899	ame-miR-3730-5p	23	-20.8 kcal/mol	0.999991
409001	disheveled-associated activator of morphogenesis 1	LOC409001	XM_006561852.3	4899	ame-miR-3730-5p	23	-20.7 kcal/mol	0.999995
409001	disheveled-associated activator of morphogenesis 1	LOC409001	XM_006561852.3	4899	ame-miR-3730-5p	23	-20.5 kcal/mol	0.999998
409001	disheveled-associated activator of morphogenesis 1	LOC409001	XM_006561852.3	4899	ame-miR-3730-5p	23	-20.2 kcal/mol	1
409001	disheveled-associated activator of morphogenesis 1	LOC409001	XM_006561852.3	4899	ame-miR-3730-5p	23	-20.1 kcal/mol	1
409001	disheveled-associated activator of morphogenesis 1	LOC409001	XM_006561852.3	4899	ame-miR-3730-5p	23	-20.0 kcal/mol	1
409001	disheveled-associated activator of morphogenesis 1	LOC409001	XM_006561852.3	4899	ame-miR-3730-5p	23	-20.0 kcal/mol	1
409050	segment polarity protein dishevelled homolog DVL-3	LOC409050	XM_006562747.3	4428	ame-miR-3730-5p	23	-28.1 kcal/mol	0.276486
409050	segment polarity protein dishevelled homolog DVL-3	LOC409050	XM_006562747.3	4428	ame-miR-3730-5p	23	-22.7 kcal/mol	0.986231
409050	segment polarity protein dishevelled homolog DVL-3	LOC409050	XM_006562747.3	4428	ame-miR-3730-5p	23	-22.5 kcal/mol	0.991046
409050	segment polarity protein dishevelled homolog DVL-3	LOC409050	XM_006562747.3	4428	ame-miR-3730-5p	23	-20.8 kcal/mol	0.999976
409050	segment polarity protein dishevelled homolog DVL-3	LOC409050	XM_006562747.3	4428	ame-miR-3730-5p	23	-20.4 kcal/mol	0.999997
409050	segment polarity protein dishevelled homolog DVL-3	LOC409050	XM_006562747.3	4428	ame-miR-3730-5p	23	-20.3 kcal/mol	0.999999
409050	segment polarity protein dishevelled homolog DVL-3	LOC409050	XM_392577.7	4498	ame-miR-3730-5p	23	-28.1 kcal/mol	0.280788
409050	segment polarity protein dishevelled homolog DVL-3	LOC409050	XM_392577.7	4498	ame-miR-3730-5p	23	-22.7 kcal/mol	0.987081
409050	segment polarity protein dishevelled homolog DVL-3	LOC409050	XM_392577.7	4498	ame-miR-3730-5p	23	-22.5 kcal/mol	0.991647
409050	segment polarity protein dishevelled homolog DVL-3	LOC409050	XM_392577.7	4498	ame-miR-3730-5p	23	-20.8 kcal/mol	0.999979
409050	segment polarity protein dishevelled homolog DVL-3	LOC409050	XM_392577.7	4498	ame-miR-3730-5p	23	-20.4 kcal/mol	0.999998
409050	segment polarity protein dishevelled homolog DVL-3	LOC409050	XM_392577.7	4498	ame-miR-3730-5p	23	-20.3 kcal/mol	0.999999
409158	C-terminal-binding protein	LOC409158	XM_006557634.2	2421	ame-miR-3730-5p	23	-26.5 kcal/mol	0.292035
409158	C-terminal-binding protein	LOC409158	XM_006557634.2	2421	ame-miR-3730-5p	23	-23.1 kcal/mol	0.853653
409158	C-terminal-binding protein	LOC409158	XM_006557634.2	2421	ame-miR-3730-5p	23	-22.7 kcal/mol	0.904803
409158	C-terminal-binding protein	LOC409158	XM_006557634.2	2421	ame-miR-3730-5p	23	-21.9 kcal/mol	0.970461
409158	C-terminal-binding protein	LOC409158	XM_006557634.2	2421	ame-miR-3730-5p	23	-21.7 kcal/mol	0.979682
409158	C-terminal-binding protein	LOC409158	XM_006557634.2	2421	ame-miR-3730-5p	23	-20.1 kcal/mol	0.99984
409158	C-terminal-binding protein	LOC409158	XM_006557634.2	2421	ame-miR-3730-5p	23	-20.0 kcal/mol	0.999898
409158	C-terminal-binding protein	LOC409158	XM_006557635.3	1978	ame-miR-3730-5p	23	-26.5 kcal/mol	0.235405
409158	C-terminal-binding protein	LOC409158	XM_006557635.3	1978	ame-miR-3730-5p	23	-23.1 kcal/mol	0.786191
409158	C-terminal-binding protein	LOC409158	XM_006557635.3	1978	ame-miR-3730-5p	23	-22.7 kcal/mol	0.849691
409158	C-terminal-binding protein	LOC409158	XM_006557635.3	1978	ame-miR-3730-5p	23	-21.9 kcal/mol	0.942715
409158	C-terminal-binding protein	LOC409158	XM_006557635.3	1978	ame-miR-3730-5p	23	-21.7 kcal/mol	0.957978
409158	C-terminal-binding protein	LOC409158	XM_006557635.3	1978	ame-miR-3730-5p	23	-20.1 kcal/mol	0.999267
409158	C-terminal-binding protein	LOC409158	XM_006557635.3	1978	ame-miR-3730-5p	23	-20.0 kcal/mol	0.999499
409158	C-terminal-binding protein	LOC409158	XM_006557637.3	2335	ame-miR-3730-5p	23	-26.5 kcal/mol	0.28133
409158	C-terminal-binding protein	LOC409158	XM_006557637.3	2335	ame-miR-3730-5p	23	-23.1 kcal/mol	0.84257
409158	C-terminal-binding protein	LOC409158	XM_006557637.3	2335	ame-miR-3730-5p	23	-22.7 kcal/mol	0.896064
409158	C-terminal-binding protein	LOC409158	XM_006557637.3	2335	ame-miR-3730-5p	23	-21.9 kcal/mol	0.966462
409158	C-terminal-binding protein	LOC409158	XM_006557637.3	2335	ame-miR-3730-5p	23	-21.7 kcal/mol	0.976647
409158	C-terminal-binding protein	LOC409158	XM_006557637.3	2335	ame-miR-3730-5p	23	-20.1 kcal/mol	0.999786
409158	C-terminal-binding protein	LOC409158	XM_006557637.3	2335	ame-miR-3730-5p	23	-20.0 kcal/mol	0.999862
409158	C-terminal-binding protein	LOC409158	XM_006557638.3	2320	ame-miR-3730-5p	23	-26.5 kcal/mol	0.279448
409158	C-terminal-binding protein	LOC409158	XM_006557638.3	2320	ame-miR-3730-5p	23	-23.1 kcal/mol	0.840548
409158	C-terminal-binding protein	LOC409158	XM_006557638.3	2320	ame-miR-3730-5p	23	-22.7 kcal/mol	0.894456
409158	C-terminal-binding protein	LOC409158	XM_006557638.3	2320	ame-miR-3730-5p	23	-21.9 kcal/mol	0.965709
409158	C-terminal-binding protein	LOC409158	XM_006557638.3	2320	ame-miR-3730-5p	23	-21.7 kcal/mol	0.976071
409158	C-terminal-binding protein	LOC409158	XM_006557638.3	2320	ame-miR-3730-5p	23	-20.1 kcal/mol	0.999775
409158	C-terminal-binding protein	LOC409158	XM_006557638.3	2320	ame-miR-3730-5p	23	-20.0 kcal/mol	0.999854
409158	C-terminal-binding protein	LOC409158	XM_006557639.3	2318	ame-miR-3730-5p	23	-26.5 kcal/mol	0.279197
409158	C-terminal-binding protein	LOC409158	XM_006557639.3	2318	ame-miR-3730-5p	23	-23.1 kcal/mol	0.840276
409158	C-terminal-binding protein	LOC409158	XM_006557639.3	2318	ame-miR-3730-5p	23	-22.7 kcal/mol	0.894239
409158	C-terminal-binding protein	LOC409158	XM_006557639.3	2318	ame-miR-3730-5p	23	-21.9 kcal/mol	0.965607
409158	C-terminal-binding protein	LOC409158	XM_006557639.3	2318	ame-miR-3730-5p	23	-21.7 kcal/mol	0.975993
409158	C-terminal-binding protein	LOC409158	XM_006557639.3	2318	ame-miR-3730-5p	23	-20.1 kcal/mol	0.999773
409158	C-terminal-binding protein	LOC409158	XM_006557639.3	2318	ame-miR-3730-5p	23	-20.0 kcal/mol	0.999853
409158	C-terminal-binding protein	LOC409158	XM_006557640.3	2020	ame-miR-3730-5p	23	-23.1 kcal/mol	0.793804
409158	C-terminal-binding protein	LOC409158	XM_006557640.3	2020	ame-miR-3730-5p	23	-22.7 kcal/mol	0.856126
409158	C-terminal-binding protein	LOC409158	XM_006557640.3	2020	ame-miR-3730-5p	23	-21.9 kcal/mol	0.946249
409158	C-terminal-binding protein	LOC409158	XM_006557640.3	2020	ame-miR-3730-5p	23	-21.7 kcal/mol	0.960816
409158	C-terminal-binding protein	LOC409158	XM_006557640.3	2020	ame-miR-3730-5p	23	-20.1 kcal/mol	0.999367
409158	C-terminal-binding protein	LOC409158	XM_006557640.3	2020	ame-miR-3730-5p	23	-20.1 kcal/mol	0.999367
409158	C-terminal-binding protein	LOC409158	XM_006557640.3	2020	ame-miR-3730-5p	23	-20.0 kcal/mol	0.999571
409158	C-terminal-binding protein	LOC409158	XM_006557641.3	2003	ame-miR-3730-5p	23	-23.1 kcal/mol	0.790757
409158	C-terminal-binding protein	LOC409158	XM_006557641.3	2003	ame-miR-3730-5p	23	-22.7 kcal/mol	0.853557
409158	C-terminal-binding protein	LOC409158	XM_006557641.3	2003	ame-miR-3730-5p	23	-21.9 kcal/mol	0.944847
409158	C-terminal-binding protein	LOC409158	XM_006557641.3	2003	ame-miR-3730-5p	23	-21.7 kcal/mol	0.959692
409158	C-terminal-binding protein	LOC409158	XM_006557641.3	2003	ame-miR-3730-5p	23	-20.1 kcal/mol	0.999328
409158	C-terminal-binding protein	LOC409158	XM_006557641.3	2003	ame-miR-3730-5p	23	-20.1 kcal/mol	0.999328
409158	C-terminal-binding protein	LOC409158	XM_006557641.3	2003	ame-miR-3730-5p	23	-20.0 kcal/mol	0.999543
409158	C-terminal-binding protein	LOC409158	XM_392682.7	2337	ame-miR-3730-5p	23	-26.5 kcal/mol	0.28158
409158	C-terminal-binding protein	LOC409158	XM_392682.7	2337	ame-miR-3730-5p	23	-23.1 kcal/mol	0.842838
409158	C-terminal-binding protein	LOC409158	XM_392682.7	2337	ame-miR-3730-5p	23	-22.7 kcal/mol	0.896277
409158	C-terminal-binding protein	LOC409158	XM_392682.7	2337	ame-miR-3730-5p	23	-21.9 kcal/mol	0.966562
409158	C-terminal-binding protein	LOC409158	XM_392682.7	2337	ame-miR-3730-5p	23	-21.7 kcal/mol	0.976723
409158	C-terminal-binding protein	LOC409158	XM_392682.7	2337	ame-miR-3730-5p	23	-20.1 kcal/mol	0.999787
409158	C-terminal-binding protein	LOC409158	XM_392682.7	2337	ame-miR-3730-5p	23	-20.0 kcal/mol	0.999863
409286	stress-activated protein kinase JNK	LOC409286	XM_006557237.3	3299	ame-miR-3730-5p	23	-25.3 kcal/mol	0.593323
409286	stress-activated protein kinase JNK	LOC409286	XM_006557237.3	3299	ame-miR-3730-5p	23	-25.3 kcal/mol	0.593323
409286	stress-activated protein kinase JNK	LOC409286	XM_006557237.3	3299	ame-miR-3730-5p	23	-23.8 kcal/mol	0.847256
409286	stress-activated protein kinase JNK	LOC409286	XM_006557237.3	3299	ame-miR-3730-5p	23	-22.1 kcal/mol	0.986818
409286	stress-activated protein kinase JNK	LOC409286	XM_006557237.3	3299	ame-miR-3730-5p	23	-21.8 kcal/mol	0.993368
409286	stress-activated protein kinase JNK	LOC409286	XM_006557237.3	3299	ame-miR-3730-5p	23	-21.7 kcal/mol	0.994847
409286	stress-activated protein kinase JNK	LOC409286	XM_006557237.3	3299	ame-miR-3730-5p	23	-21.5 kcal/mol	0.997008
409286	stress-activated protein kinase JNK	LOC409286	XM_006557237.3	3299	ame-miR-3730-5p	23	-21.4 kcal/mol	0.997766
409286	stress-activated protein kinase JNK	LOC409286	XM_006557237.3	3299	ame-miR-3730-5p	23	-20.7 kcal/mol	0.999817
409286	stress-activated protein kinase JNK	LOC409286	XM_006557237.3	3299	ame-miR-3730-5p	23	-20.7 kcal/mol	0.999817
409286	stress-activated protein kinase JNK	LOC409286	XM_006557237.3	3299	ame-miR-3730-5p	23	-20.6 kcal/mol	0.999881
409286	stress-activated protein kinase JNK	LOC409286	XM_006557237.3	3299	ame-miR-3730-5p	23	-20.6 kcal/mol	0.999881
409286	stress-activated protein kinase JNK	LOC409286	XM_006557237.3	3299	ame-miR-3730-5p	23	-20.5 kcal/mol	0.999925
409286	stress-activated protein kinase JNK	LOC409286	XM_006557237.3	3299	ame-miR-3730-5p	23	-20.5 kcal/mol	0.999925
409286	stress-activated protein kinase JNK	LOC409286	XM_006557237.3	3299	ame-miR-3730-5p	23	-20.3 kcal/mol	0.999972
409286	stress-activated protein kinase JNK	LOC409286	XM_006557237.3	3299	ame-miR-3730-5p	23	-20.1 kcal/mol	0.99999
409286	stress-activated protein kinase JNK	LOC409286	XM_006557237.3	3299	ame-miR-3730-5p	23	-20.0 kcal/mol	0.999995
409286	stress-activated protein kinase JNK	LOC409286	XM_006557238.3	2902	ame-miR-3730-5p	23	-25.3 kcal/mol	0.541396
409286	stress-activated protein kinase JNK	LOC409286	XM_006557238.3	2902	ame-miR-3730-5p	23	-22.1 kcal/mol	0.978058
409286	stress-activated protein kinase JNK	LOC409286	XM_006557238.3	2902	ame-miR-3730-5p	23	-21.8 kcal/mol	0.98812
409286	stress-activated protein kinase JNK	LOC409286	XM_006557238.3	2902	ame-miR-3730-5p	23	-20.7 kcal/mol	0.999526
409286	stress-activated protein kinase JNK	LOC409286	XM_006557238.3	2902	ame-miR-3730-5p	23	-20.7 kcal/mol	0.999526
409286	stress-activated protein kinase JNK	LOC409286	XM_006557238.3	2902	ame-miR-3730-5p	23	-20.6 kcal/mol	0.999679
409286	stress-activated protein kinase JNK	LOC409286	XM_006557238.3	2902	ame-miR-3730-5p	23	-20.6 kcal/mol	0.999679
409286	stress-activated protein kinase JNK	LOC409286	XM_006557238.3	2902	ame-miR-3730-5p	23	-20.5 kcal/mol	0.999787
409286	stress-activated protein kinase JNK	LOC409286	XM_006557238.3	2902	ame-miR-3730-5p	23	-20.5 kcal/mol	0.999787
409286	stress-activated protein kinase JNK	LOC409286	XM_006557238.3	2902	ame-miR-3730-5p	23	-20.4 kcal/mol	0.999861
409286	stress-activated protein kinase JNK	LOC409286	XM_006557238.3	2902	ame-miR-3730-5p	23	-20.3 kcal/mol	0.999912
409286	stress-activated protein kinase JNK	LOC409286	XM_006557238.3	2902	ame-miR-3730-5p	23	-20.1 kcal/mol	0.999967
409286	stress-activated protein kinase JNK	LOC409286	XM_006557238.3	2902	ame-miR-3730-5p	23	-20.0 kcal/mol	0.99998
409286	stress-activated protein kinase JNK	LOC409286	XM_006557239.3	2885	ame-miR-3730-5p	23	-25.3 kcal/mol	0.539021
409286	stress-activated protein kinase JNK	LOC409286	XM_006557239.3	2885	ame-miR-3730-5p	23	-25.3 kcal/mol	0.539021
409286	stress-activated protein kinase JNK	LOC409286	XM_006557239.3	2885	ame-miR-3730-5p	23	-23.8 kcal/mol	0.804402
409286	stress-activated protein kinase JNK	LOC409286	XM_006557239.3	2885	ame-miR-3730-5p	23	-22.1 kcal/mol	0.977568
409286	stress-activated protein kinase JNK	LOC409286	XM_006557239.3	2885	ame-miR-3730-5p	23	-21.8 kcal/mol	0.987816
409286	stress-activated protein kinase JNK	LOC409286	XM_006557239.3	2885	ame-miR-3730-5p	23	-21.7 kcal/mol	0.990266
409286	stress-activated protein kinase JNK	LOC409286	XM_006557239.3	2885	ame-miR-3730-5p	23	-21.5 kcal/mol	0.994001
409286	stress-activated protein kinase JNK	LOC409286	XM_006557239.3	2885	ame-miR-3730-5p	23	-21.4 kcal/mol	0.995377
409286	stress-activated protein kinase JNK	LOC409286	XM_006557239.3	2885	ame-miR-3730-5p	23	-20.7 kcal/mol	0.999506
409286	stress-activated protein kinase JNK	LOC409286	XM_006557239.3	2885	ame-miR-3730-5p	23	-20.7 kcal/mol	0.999506
409286	stress-activated protein kinase JNK	LOC409286	XM_006557239.3	2885	ame-miR-3730-5p	23	-20.6 kcal/mol	0.999665
409286	stress-activated protein kinase JNK	LOC409286	XM_006557239.3	2885	ame-miR-3730-5p	23	-20.6 kcal/mol	0.999665
409286	stress-activated protein kinase JNK	LOC409286	XM_006557239.3	2885	ame-miR-3730-5p	23	-20.5 kcal/mol	0.999777
409286	stress-activated protein kinase JNK	LOC409286	XM_006557239.3	2885	ame-miR-3730-5p	23	-20.5 kcal/mol	0.999777
409286	stress-activated protein kinase JNK	LOC409286	XM_006557239.3	2885	ame-miR-3730-5p	23	-20.3 kcal/mol	0.999907
409286	stress-activated protein kinase JNK	LOC409286	XM_006557239.3	2885	ame-miR-3730-5p	23	-20.1 kcal/mol	0.999965
409286	stress-activated protein kinase JNK	LOC409286	XM_006557239.3	2885	ame-miR-3730-5p	23	-20.0 kcal/mol	0.999979
409286	stress-activated protein kinase JNK	LOC409286	XM_006557240.3	2439	ame-miR-3730-5p	23	-25.3 kcal/mol	0.471886
409286	stress-activated protein kinase JNK	LOC409286	XM_006557240.3	2439	ame-miR-3730-5p	23	-22.1 kcal/mol	0.959561
409286	stress-activated protein kinase JNK	LOC409286	XM_006557240.3	2439	ame-miR-3730-5p	23	-21.8 kcal/mol	0.976059
409286	stress-activated protein kinase JNK	LOC409286	XM_006557240.3	2439	ame-miR-3730-5p	23	-20.7 kcal/mol	0.998498
409286	stress-activated protein kinase JNK	LOC409286	XM_006557240.3	2439	ame-miR-3730-5p	23	-20.7 kcal/mol	0.998498
409286	stress-activated protein kinase JNK	LOC409286	XM_006557240.3	2439	ame-miR-3730-5p	23	-20.6 kcal/mol	0.998927
409286	stress-activated protein kinase JNK	LOC409286	XM_006557240.3	2439	ame-miR-3730-5p	23	-20.6 kcal/mol	0.998927
409286	stress-activated protein kinase JNK	LOC409286	XM_006557240.3	2439	ame-miR-3730-5p	23	-20.5 kcal/mol	0.999247
409286	stress-activated protein kinase JNK	LOC409286	XM_006557240.3	2439	ame-miR-3730-5p	23	-20.5 kcal/mol	0.999247
409286	stress-activated protein kinase JNK	LOC409286	XM_006557240.3	2439	ame-miR-3730-5p	23	-20.3 kcal/mol	0.999649
409286	stress-activated protein kinase JNK	LOC409286	XM_006557240.3	2439	ame-miR-3730-5p	23	-20.1 kcal/mol	0.999849
409286	stress-activated protein kinase JNK	LOC409286	XM_006557240.3	2439	ame-miR-3730-5p	23	-20.0 kcal/mol	0.999904
409286	stress-activated protein kinase JNK	LOC409286	XM_016911128.2	2467	ame-miR-3730-5p	23	-25.3 kcal/mol	0.476385
409286	stress-activated protein kinase JNK	LOC409286	XM_016911128.2	2467	ame-miR-3730-5p	23	-22.1 kcal/mol	0.96105
409286	stress-activated protein kinase JNK	LOC409286	XM_016911128.2	2467	ame-miR-3730-5p	23	-21.8 kcal/mol	0.977067
409286	stress-activated protein kinase JNK	LOC409286	XM_016911128.2	2467	ame-miR-3730-5p	23	-20.7 kcal/mol	0.998601
409286	stress-activated protein kinase JNK	LOC409286	XM_016911128.2	2467	ame-miR-3730-5p	23	-20.7 kcal/mol	0.998601
409286	stress-activated protein kinase JNK	LOC409286	XM_016911128.2	2467	ame-miR-3730-5p	23	-20.6 kcal/mol	0.999004
409286	stress-activated protein kinase JNK	LOC409286	XM_016911128.2	2467	ame-miR-3730-5p	23	-20.6 kcal/mol	0.999004
409286	stress-activated protein kinase JNK	LOC409286	XM_016911128.2	2467	ame-miR-3730-5p	23	-20.5 kcal/mol	0.999303
409286	stress-activated protein kinase JNK	LOC409286	XM_016911128.2	2467	ame-miR-3730-5p	23	-20.5 kcal/mol	0.999303
409286	stress-activated protein kinase JNK	LOC409286	XM_016911128.2	2467	ame-miR-3730-5p	23	-20.3 kcal/mol	0.999678
409286	stress-activated protein kinase JNK	LOC409286	XM_016911128.2	2467	ame-miR-3730-5p	23	-20.1 kcal/mol	0.999863
409286	stress-activated protein kinase JNK	LOC409286	XM_016911128.2	2467	ame-miR-3730-5p	23	-20.0 kcal/mol	0.999913
409286	stress-activated protein kinase JNK	LOC409286	XM_026439401.1	2557	ame-miR-3730-5p	23	-25.3 kcal/mol	0.49058
409286	stress-activated protein kinase JNK	LOC409286	XM_026439401.1	2557	ame-miR-3730-5p	23	-24.0 kcal/mol	0.726347
409286	stress-activated protein kinase JNK	LOC409286	XM_026439401.1	2557	ame-miR-3730-5p	23	-22.1 kcal/mol	0.965458
409286	stress-activated protein kinase JNK	LOC409286	XM_026439401.1	2557	ame-miR-3730-5p	23	-21.8 kcal/mol	0.980019
409286	stress-activated protein kinase JNK	LOC409286	XM_026439401.1	2557	ame-miR-3730-5p	23	-20.7 kcal/mol	0.998886
409286	stress-activated protein kinase JNK	LOC409286	XM_026439401.1	2557	ame-miR-3730-5p	23	-20.7 kcal/mol	0.998886
409286	stress-activated protein kinase JNK	LOC409286	XM_026439401.1	2557	ame-miR-3730-5p	23	-20.6 kcal/mol	0.999215
409286	stress-activated protein kinase JNK	LOC409286	XM_026439401.1	2557	ame-miR-3730-5p	23	-20.6 kcal/mol	0.999215
409286	stress-activated protein kinase JNK	LOC409286	XM_026439401.1	2557	ame-miR-3730-5p	23	-20.5 kcal/mol	0.999457
409286	stress-activated protein kinase JNK	LOC409286	XM_026439401.1	2557	ame-miR-3730-5p	23	-20.5 kcal/mol	0.999457
409286	stress-activated protein kinase JNK	LOC409286	XM_026439401.1	2557	ame-miR-3730-5p	23	-20.3 kcal/mol	0.999755
409286	stress-activated protein kinase JNK	LOC409286	XM_026439401.1	2557	ame-miR-3730-5p	23	-20.2 kcal/mol	0.99984
409286	stress-activated protein kinase JNK	LOC409286	XM_026439401.1	2557	ame-miR-3730-5p	23	-20.1 kcal/mol	0.999898
409286	stress-activated protein kinase JNK	LOC409286	XM_026439401.1	2557	ame-miR-3730-5p	23	-20.0 kcal/mol	0.999937
409321	mothers against decapentaplegic homolog 4	LOC409321	XM_006563455.3	3046	ame-miR-3730-5p	23	-21.0 kcal/mol	0.998993
409321	mothers against decapentaplegic homolog 4	LOC409321	XM_006563455.3	3046	ame-miR-3730-5p	23	-20.8 kcal/mol	0.999508
409321	mothers against decapentaplegic homolog 4	LOC409321	XM_006563455.3	3046	ame-miR-3730-5p	23	-20.7 kcal/mol	0.999666
409321	mothers against decapentaplegic homolog 4	LOC409321	XM_006563455.3	3046	ame-miR-3730-5p	23	-20.6 kcal/mol	0.999777
409321	mothers against decapentaplegic homolog 4	LOC409321	XM_006563455.3	3046	ame-miR-3730-5p	23	-20.6 kcal/mol	0.999777
409321	mothers against decapentaplegic homolog 4	LOC409321	XM_006563455.3	3046	ame-miR-3730-5p	23	-20.6 kcal/mol	0.999777
409321	mothers against decapentaplegic homolog 4	LOC409321	XM_006563455.3	3046	ame-miR-3730-5p	23	-20.2 kcal/mol	0.999965
409321	mothers against decapentaplegic homolog 4	LOC409321	XM_006563455.3	3046	ame-miR-3730-5p	23	-20.0 kcal/mol	0.999988
409321	mothers against decapentaplegic homolog 4	LOC409321	XM_006563456.3	3026	ame-miR-3730-5p	23	-23.3 kcal/mol	0.888985
409321	mothers against decapentaplegic homolog 4	LOC409321	XM_006563456.3	3026	ame-miR-3730-5p	23	-21.0 kcal/mol	0.998949
409321	mothers against decapentaplegic homolog 4	LOC409321	XM_006563456.3	3026	ame-miR-3730-5p	23	-20.8 kcal/mol	0.999485
409321	mothers against decapentaplegic homolog 4	LOC409321	XM_006563456.3	3026	ame-miR-3730-5p	23	-20.6 kcal/mol	0.999766
409321	mothers against decapentaplegic homolog 4	LOC409321	XM_006563456.3	3026	ame-miR-3730-5p	23	-20.6 kcal/mol	0.999766
409321	mothers against decapentaplegic homolog 4	LOC409321	XM_006563456.3	3026	ame-miR-3730-5p	23	-20.6 kcal/mol	0.999766
409321	mothers against decapentaplegic homolog 4	LOC409321	XM_006563456.3	3026	ame-miR-3730-5p	23	-20.2 kcal/mol	0.999962
409321	mothers against decapentaplegic homolog 4	LOC409321	XM_006563456.3	3026	ame-miR-3730-5p	23	-20.0 kcal/mol	0.999987
409321	mothers against decapentaplegic homolog 4	LOC409321	XM_006563457.3	3019	ame-miR-3730-5p	23	-24.8 kcal/mol	0.647914
409321	mothers against decapentaplegic homolog 4	LOC409321	XM_006563457.3	3019	ame-miR-3730-5p	23	-21.0 kcal/mol	0.998934
409321	mothers against decapentaplegic homolog 4	LOC409321	XM_006563457.3	3019	ame-miR-3730-5p	23	-20.8 kcal/mol	0.999477
409321	mothers against decapentaplegic homolog 4	LOC409321	XM_006563457.3	3019	ame-miR-3730-5p	23	-20.6 kcal/mol	0.999762
409321	mothers against decapentaplegic homolog 4	LOC409321	XM_006563457.3	3019	ame-miR-3730-5p	23	-20.6 kcal/mol	0.999762
409321	mothers against decapentaplegic homolog 4	LOC409321	XM_006563457.3	3019	ame-miR-3730-5p	23	-20.6 kcal/mol	0.999762
409321	mothers against decapentaplegic homolog 4	LOC409321	XM_006563457.3	3019	ame-miR-3730-5p	23	-20.2 kcal/mol	0.999962
409321	mothers against decapentaplegic homolog 4	LOC409321	XM_006563457.3	3019	ame-miR-3730-5p	23	-20.0 kcal/mol	0.999987
409321	mothers against decapentaplegic homolog 4	LOC409321	XM_006563458.3	2989	ame-miR-3730-5p	23	-23.3 kcal/mol	0.885855
409321	mothers against decapentaplegic homolog 4	LOC409321	XM_006563458.3	2989	ame-miR-3730-5p	23	-21.0 kcal/mol	0.998864
409321	mothers against decapentaplegic homolog 4	LOC409321	XM_006563458.3	2989	ame-miR-3730-5p	23	-20.8 kcal/mol	0.999439
409321	mothers against decapentaplegic homolog 4	LOC409321	XM_006563458.3	2989	ame-miR-3730-5p	23	-20.6 kcal/mol	0.999743
409321	mothers against decapentaplegic homolog 4	LOC409321	XM_006563458.3	2989	ame-miR-3730-5p	23	-20.6 kcal/mol	0.999743
409321	mothers against decapentaplegic homolog 4	LOC409321	XM_006563458.3	2989	ame-miR-3730-5p	23	-20.6 kcal/mol	0.999743
409321	mothers against decapentaplegic homolog 4	LOC409321	XM_006563458.3	2989	ame-miR-3730-5p	23	-20.2 kcal/mol	0.999958
409321	mothers against decapentaplegic homolog 4	LOC409321	XM_006563458.3	2989	ame-miR-3730-5p	23	-20.0 kcal/mol	0.999985
409321	mothers against decapentaplegic homolog 4	LOC409321	XM_006563459.3	2908	ame-miR-3730-5p	23	-21.0 kcal/mol	0.99865
409321	mothers against decapentaplegic homolog 4	LOC409321	XM_006563459.3	2908	ame-miR-3730-5p	23	-20.8 kcal/mol	0.999323
409321	mothers against decapentaplegic homolog 4	LOC409321	XM_006563459.3	2908	ame-miR-3730-5p	23	-20.6 kcal/mol	0.999684
409321	mothers against decapentaplegic homolog 4	LOC409321	XM_006563459.3	2908	ame-miR-3730-5p	23	-20.6 kcal/mol	0.999684
409321	mothers against decapentaplegic homolog 4	LOC409321	XM_006563459.3	2908	ame-miR-3730-5p	23	-20.6 kcal/mol	0.999684
409321	mothers against decapentaplegic homolog 4	LOC409321	XM_006563459.3	2908	ame-miR-3730-5p	23	-20.2 kcal/mol	0.999946
409321	mothers against decapentaplegic homolog 4	LOC409321	XM_006563459.3	2908	ame-miR-3730-5p	23	-20.0 kcal/mol	0.999981
409321	mothers against decapentaplegic homolog 4	LOC409321	XM_006563460.3	2905	ame-miR-3730-5p	23	-21.0 kcal/mol	0.998642
409321	mothers against decapentaplegic homolog 4	LOC409321	XM_006563460.3	2905	ame-miR-3730-5p	23	-20.8 kcal/mol	0.999318
409321	mothers against decapentaplegic homolog 4	LOC409321	XM_006563460.3	2905	ame-miR-3730-5p	23	-20.6 kcal/mol	0.999682
409321	mothers against decapentaplegic homolog 4	LOC409321	XM_006563460.3	2905	ame-miR-3730-5p	23	-20.6 kcal/mol	0.999682
409321	mothers against decapentaplegic homolog 4	LOC409321	XM_006563460.3	2905	ame-miR-3730-5p	23	-20.6 kcal/mol	0.999682
409321	mothers against decapentaplegic homolog 4	LOC409321	XM_006563460.3	2905	ame-miR-3730-5p	23	-20.2 kcal/mol	0.999946
409321	mothers against decapentaplegic homolog 4	LOC409321	XM_006563460.3	2905	ame-miR-3730-5p	23	-20.0 kcal/mol	0.999981
409321	mothers against decapentaplegic homolog 4	LOC409321	XM_006563462.3	2878	ame-miR-3730-5p	23	-21.0 kcal/mol	0.998561
409321	mothers against decapentaplegic homolog 4	LOC409321	XM_006563462.3	2878	ame-miR-3730-5p	23	-20.8 kcal/mol	0.999274
409321	mothers against decapentaplegic homolog 4	LOC409321	XM_006563462.3	2878	ame-miR-3730-5p	23	-20.6 kcal/mol	0.999659
409321	mothers against decapentaplegic homolog 4	LOC409321	XM_006563462.3	2878	ame-miR-3730-5p	23	-20.6 kcal/mol	0.999659
409321	mothers against decapentaplegic homolog 4	LOC409321	XM_006563462.3	2878	ame-miR-3730-5p	23	-20.6 kcal/mol	0.999659
409321	mothers against decapentaplegic homolog 4	LOC409321	XM_006563462.3	2878	ame-miR-3730-5p	23	-20.2 kcal/mol	0.999941
409321	mothers against decapentaplegic homolog 4	LOC409321	XM_006563462.3	2878	ame-miR-3730-5p	23	-20.0 kcal/mol	0.999979
409321	mothers against decapentaplegic homolog 4	LOC409321	XM_392838.7	3045	ame-miR-3730-5p	23	-23.3 kcal/mol	0.890557
409321	mothers against decapentaplegic homolog 4	LOC409321	XM_392838.7	3045	ame-miR-3730-5p	23	-21.0 kcal/mol	0.998991
409321	mothers against decapentaplegic homolog 4	LOC409321	XM_392838.7	3045	ame-miR-3730-5p	23	-20.8 kcal/mol	0.999507
409321	mothers against decapentaplegic homolog 4	LOC409321	XM_392838.7	3045	ame-miR-3730-5p	23	-20.6 kcal/mol	0.999777
409321	mothers against decapentaplegic homolog 4	LOC409321	XM_392838.7	3045	ame-miR-3730-5p	23	-20.6 kcal/mol	0.999777
409321	mothers against decapentaplegic homolog 4	LOC409321	XM_392838.7	3045	ame-miR-3730-5p	23	-20.6 kcal/mol	0.999777
409321	mothers against decapentaplegic homolog 4	LOC409321	XM_392838.7	3045	ame-miR-3730-5p	23	-20.2 kcal/mol	0.999964
409321	mothers against decapentaplegic homolog 4	LOC409321	XM_392838.7	3045	ame-miR-3730-5p	23	-20.0 kcal/mol	0.999988
409544	ruvB-like 1	LOC409544	XM_393051.7	1481	ame-miR-3730-5p	23	-23.1 kcal/mol	0.670335
409544	ruvB-like 1	LOC409544	XM_393051.7	1481	ame-miR-3730-5p	23	-22.7 kcal/mol	0.746137
409544	ruvB-like 1	LOC409544	XM_393051.7	1481	ame-miR-3730-5p	23	-21.5 kcal/mol	0.924625
409767	casein kinase II subunit alpha	LOC409767	XM_006570410.3	1676	ame-miR-3730-5p	23	-24.6 kcal/mol	0.442774
409767	casein kinase II subunit alpha	LOC409767	XM_006570410.3	1676	ame-miR-3730-5p	23	-22.6 kcal/mol	0.810331
409767	casein kinase II subunit alpha	LOC409767	XM_006570410.3	1676	ame-miR-3730-5p	23	-22.3 kcal/mol	0.856949
409767	casein kinase II subunit alpha	LOC409767	XM_006570410.3	1676	ame-miR-3730-5p	23	-22.1 kcal/mol	0.884527
409767	casein kinase II subunit alpha	LOC409767	XM_006570410.3	1676	ame-miR-3730-5p	23	-21.0 kcal/mol	0.978398
409767	casein kinase II subunit alpha	LOC409767	XM_006570410.3	1676	ame-miR-3730-5p	23	-20.2 kcal/mol	0.997046
409767	casein kinase II subunit alpha	LOC409767	XM_006570412.3	3680	ame-miR-3730-5p	23	-24.6 kcal/mol	0.759544
409767	casein kinase II subunit alpha	LOC409767	XM_006570412.3	3680	ame-miR-3730-5p	23	-22.6 kcal/mol	0.976917
409767	casein kinase II subunit alpha	LOC409767	XM_006570412.3	3680	ame-miR-3730-5p	23	-22.3 kcal/mol	0.987228
409767	casein kinase II subunit alpha	LOC409767	XM_006570412.3	3680	ame-miR-3730-5p	23	-22.1 kcal/mol	0.991818
409767	casein kinase II subunit alpha	LOC409767	XM_006570412.3	3680	ame-miR-3730-5p	23	-21.8 kcal/mol	0.996153
409767	casein kinase II subunit alpha	LOC409767	XM_006570412.3	3680	ame-miR-3730-5p	23	-21.0 kcal/mol	0.999726
409767	casein kinase II subunit alpha	LOC409767	XM_006570412.3	3680	ame-miR-3730-5p	23	-20.8 kcal/mol	0.999882
409767	casein kinase II subunit alpha	LOC409767	XM_006570412.3	3680	ame-miR-3730-5p	23	-20.5 kcal/mol	0.999971
409767	casein kinase II subunit alpha	LOC409767	XM_006570412.3	3680	ame-miR-3730-5p	23	-20.2 kcal/mol	0.999994
409767	casein kinase II subunit alpha	LOC409767	XM_623394.6	3672	ame-miR-3730-5p	23	-24.6 kcal/mol	0.758757
409767	casein kinase II subunit alpha	LOC409767	XM_623394.6	3672	ame-miR-3730-5p	23	-22.6 kcal/mol	0.976733
409767	casein kinase II subunit alpha	LOC409767	XM_623394.6	3672	ame-miR-3730-5p	23	-22.3 kcal/mol	0.987111
409767	casein kinase II subunit alpha	LOC409767	XM_623394.6	3672	ame-miR-3730-5p	23	-22.1 kcal/mol	0.991736
409767	casein kinase II subunit alpha	LOC409767	XM_623394.6	3672	ame-miR-3730-5p	23	-21.8 kcal/mol	0.996109
409767	casein kinase II subunit alpha	LOC409767	XM_623394.6	3672	ame-miR-3730-5p	23	-21.0 kcal/mol	0.999722
409767	casein kinase II subunit alpha	LOC409767	XM_623394.6	3672	ame-miR-3730-5p	23	-20.8 kcal/mol	0.99988
409767	casein kinase II subunit alpha	LOC409767	XM_623394.6	3672	ame-miR-3730-5p	23	-20.5 kcal/mol	0.999971
409767	casein kinase II subunit alpha	LOC409767	XM_623394.6	3672	ame-miR-3730-5p	23	-20.2 kcal/mol	0.999994
409791	cAMP-dependent protein kinase catalytic subunit	LOC409791	XM_393285.7	4298	ame-miR-3730-5p	23	-27.1 kcal/mol	0.396453
409791	cAMP-dependent protein kinase catalytic subunit	LOC409791	XM_393285.7	4298	ame-miR-3730-5p	23	-25.1 kcal/mol	0.732268
409791	cAMP-dependent protein kinase catalytic subunit	LOC409791	XM_393285.7	4298	ame-miR-3730-5p	23	-25.1 kcal/mol	0.732268
409791	cAMP-dependent protein kinase catalytic subunit	LOC409791	XM_393285.7	4298	ame-miR-3730-5p	23	-24.8 kcal/mol	0.781661
409791	cAMP-dependent protein kinase catalytic subunit	LOC409791	XM_393285.7	4298	ame-miR-3730-5p	23	-23.6 kcal/mol	0.933182
409791	cAMP-dependent protein kinase catalytic subunit	LOC409791	XM_393285.7	4298	ame-miR-3730-5p	23	-23.1 kcal/mol	0.967907
409791	cAMP-dependent protein kinase catalytic subunit	LOC409791	XM_393285.7	4298	ame-miR-3730-5p	23	-21.3 kcal/mol	0.999713
409791	cAMP-dependent protein kinase catalytic subunit	LOC409791	XM_393285.7	4298	ame-miR-3730-5p	23	-21.0 kcal/mol	0.999919
409791	cAMP-dependent protein kinase catalytic subunit	LOC409791	XM_393285.7	4298	ame-miR-3730-5p	23	-20.9 kcal/mol	0.999949
409791	cAMP-dependent protein kinase catalytic subunit	LOC409791	XM_393285.7	4298	ame-miR-3730-5p	23	-20.7 kcal/mol	0.999981
409791	cAMP-dependent protein kinase catalytic subunit	LOC409791	XM_393285.7	4298	ame-miR-3730-5p	23	-20.5 kcal/mol	0.999994
409791	cAMP-dependent protein kinase catalytic subunit	LOC409791	XM_393285.7	4298	ame-miR-3730-5p	23	-20.1 kcal/mol	1
409910	ras-like GTP-binding protein Rho1	LOC409910	XM_016911385.2	855	ame-miR-3730-5p	23	-23.4 kcal/mol	0.378884
409910	ras-like GTP-binding protein Rho1	LOC409910	XM_016911386.2	1159	ame-miR-3730-5p	23	-23.4 kcal/mol	0.505014
409910	ras-like GTP-binding protein Rho1	LOC409910	XM_016911386.2	1159	ame-miR-3730-5p	23	-20.0 kcal/mol	0.988086
409910	ras-like GTP-binding protein Rho1	LOC409910	XM_016911389.2	964	ame-miR-3730-5p	23	-23.4 kcal/mol	0.427047
409910	ras-like GTP-binding protein Rho1	LOC409910	XM_016911392.2	907	ame-miR-3730-5p	23	-23.4 kcal/mol	0.402271
409910	ras-like GTP-binding protein Rho1	LOC409910	XM_016911393.2	1073	ame-miR-3730-5p	23	-23.4 kcal/mol	0.471914
409910	ras-like GTP-binding protein Rho1	LOC409910	XM_016911393.2	1073	ame-miR-3730-5p	23	-20.0 kcal/mol	0.983077
409910	ras-like GTP-binding protein Rho1	LOC409910	XM_016911394.2	893	ame-miR-3730-5p	23	-23.4 kcal/mol	0.396048
409910	ras-like GTP-binding protein Rho1	LOC409910	XM_016911394.2	893	ame-miR-3730-5p	23	-21.3 kcal/mol	0.801951
409910	ras-like GTP-binding protein Rho1	LOC409910	XM_026440715.1	1066	ame-miR-3730-5p	23	-23.4 kcal/mol	0.469131
409910	ras-like GTP-binding protein Rho1	LOC409910	XM_026440715.1	1066	ame-miR-3730-5p	23	-20.0 kcal/mol	0.982584
551883	voltage-dependent T-type calcium channel subunit alpha-1G	LOC551883	XM_026443551.1	11906	ame-miR-3730-5p	23	-29.4 kcal/mol	0.410129
410129	casein kinase I	LOC410129	XM_393612.7	1935	ame-miR-3730-5p	23	-25.2 kcal/mol	0.399543
410129	casein kinase I	LOC410129	XM_393612.7	1935	ame-miR-3730-5p	23	-22.4 kcal/mol	0.884622
410129	casein kinase I	LOC410129	XM_393612.7	1935	ame-miR-3730-5p	23	-21.8 kcal/mol	0.947247
410129	casein kinase I	LOC410129	XM_393612.7	1935	ame-miR-3730-5p	23	-21.7 kcal/mol	0.954849
410129	casein kinase I	LOC410129	XM_393612.7	1935	ame-miR-3730-5p	23	-20.3 kcal/mol	0.998295
410184	F-box-like/WD repeat-containing protein TBL1XR1	LOC410184	XM_393667.7	1844	ame-miR-3730-5p	23	-21.3 kcal/mol	0.973288
410184	F-box-like/WD repeat-containing protein TBL1XR1	LOC410184	XM_393667.7	1844	ame-miR-3730-5p	23	-20.6 kcal/mol	0.994511
410184	F-box-like/WD repeat-containing protein TBL1XR1	LOC410184	XM_393667.7	1844	ame-miR-3730-5p	23	-20.6 kcal/mol	0.994511
410184	F-box-like/WD repeat-containing protein TBL1XR1	LOC410184	XM_393667.7	1844	ame-miR-3730-5p	23	-20.5 kcal/mol	0.995837
410724	protein prickle	LOC410724	XM_006569605.3	3837	ame-miR-3730-5p	23	-26.6 kcal/mol	0.431738
410724	protein prickle	LOC410724	XM_006569605.3	3837	ame-miR-3730-5p	23	-25.1 kcal/mol	0.689267
410724	protein prickle	LOC410724	XM_006569605.3	3837	ame-miR-3730-5p	23	-24.6 kcal/mol	0.774435
410724	protein prickle	LOC410724	XM_006569605.3	3837	ame-miR-3730-5p	23	-24.5 kcal/mol	0.790506
410724	protein prickle	LOC410724	XM_006569605.3	3837	ame-miR-3730-5p	23	-23.5 kcal/mol	0.920912
410724	protein prickle	LOC410724	XM_006569605.3	3837	ame-miR-3730-5p	23	-23.3 kcal/mol	0.938904
410724	protein prickle	LOC410724	XM_006569605.3	3837	ame-miR-3730-5p	23	-23.1 kcal/mol	0.954026
410724	protein prickle	LOC410724	XM_006569605.3	3837	ame-miR-3730-5p	23	-22.8 kcal/mol	0.971601
410724	protein prickle	LOC410724	XM_006569605.3	3837	ame-miR-3730-5p	23	-22.7 kcal/mol	0.976202
410724	protein prickle	LOC410724	XM_006569605.3	3837	ame-miR-3730-5p	23	-22.7 kcal/mol	0.976202
410724	protein prickle	LOC410724	XM_006569605.3	3837	ame-miR-3730-5p	23	-22.6 kcal/mol	0.980232
410724	protein prickle	LOC410724	XM_006569605.3	3837	ame-miR-3730-5p	23	-22.6 kcal/mol	0.980232
410724	protein prickle	LOC410724	XM_006569605.3	3837	ame-miR-3730-5p	23	-21.9 kcal/mol	0.995944
410724	protein prickle	LOC410724	XM_006569605.3	3837	ame-miR-3730-5p	23	-21.8 kcal/mol	0.996914
410724	protein prickle	LOC410724	XM_006569605.3	3837	ame-miR-3730-5p	23	-21.8 kcal/mol	0.996914
410724	protein prickle	LOC410724	XM_006569605.3	3837	ame-miR-3730-5p	23	-21.6 kcal/mol	0.998286
410724	protein prickle	LOC410724	XM_006569605.3	3837	ame-miR-3730-5p	23	-21.1 kcal/mol	0.999701
410724	protein prickle	LOC410724	XM_006569605.3	3837	ame-miR-3730-5p	23	-20.8 kcal/mol	0.999916
410724	protein prickle	LOC410724	XM_006569605.3	3837	ame-miR-3730-5p	23	-20.7 kcal/mol	0.999947
410724	protein prickle	LOC410724	XM_006569605.3	3837	ame-miR-3730-5p	23	-20.4 kcal/mol	0.999989
410724	protein prickle	LOC410724	XM_006569605.3	3837	ame-miR-3730-5p	23	-20.2 kcal/mol	0.999996
410724	protein prickle	LOC410724	XM_006569605.3	3837	ame-miR-3730-5p	23	-20.2 kcal/mol	0.999996
410724	protein prickle	LOC410724	XM_006569605.3	3837	ame-miR-3730-5p	23	-20.0 kcal/mol	0.999999
410724	protein prickle	LOC410724	XM_006569606.3	3461	ame-miR-3730-5p	23	-26.6 kcal/mol	0.394915
410724	protein prickle	LOC410724	XM_006569606.3	3461	ame-miR-3730-5p	23	-24.6 kcal/mol	0.73697
410724	protein prickle	LOC410724	XM_006569606.3	3461	ame-miR-3730-5p	23	-24.5 kcal/mol	0.753993
410724	protein prickle	LOC410724	XM_006569606.3	3461	ame-miR-3730-5p	23	-23.5 kcal/mol	0.898378
410724	protein prickle	LOC410724	XM_006569606.3	3461	ame-miR-3730-5p	23	-23.3 kcal/mol	0.919648
410724	protein prickle	LOC410724	XM_006569606.3	3461	ame-miR-3730-5p	23	-23.1 kcal/mol	0.93798
410724	protein prickle	LOC410724	XM_006569606.3	3461	ame-miR-3730-5p	23	-22.8 kcal/mol	0.960023
410724	protein prickle	LOC410724	XM_006569606.3	3461	ame-miR-3730-5p	23	-22.7 kcal/mol	0.965978
410724	protein prickle	LOC410724	XM_006569606.3	3461	ame-miR-3730-5p	23	-22.7 kcal/mol	0.965978
410724	protein prickle	LOC410724	XM_006569606.3	3461	ame-miR-3730-5p	23	-22.6 kcal/mol	0.971279
410724	protein prickle	LOC410724	XM_006569606.3	3461	ame-miR-3730-5p	23	-22.6 kcal/mol	0.971279
410724	protein prickle	LOC410724	XM_006569606.3	3461	ame-miR-3730-5p	23	-21.9 kcal/mol	0.993253
410724	protein prickle	LOC410724	XM_006569606.3	3461	ame-miR-3730-5p	23	-21.8 kcal/mol	0.994748
410724	protein prickle	LOC410724	XM_006569606.3	3461	ame-miR-3730-5p	23	-21.8 kcal/mol	0.994748
410724	protein prickle	LOC410724	XM_006569606.3	3461	ame-miR-3730-5p	23	-21.6 kcal/mol	0.996937
410724	protein prickle	LOC410724	XM_006569606.3	3461	ame-miR-3730-5p	23	-21.2 kcal/mol	0.999122
410724	protein prickle	LOC410724	XM_006569606.3	3461	ame-miR-3730-5p	23	-21.1 kcal/mol	0.999383
410724	protein prickle	LOC410724	XM_006569606.3	3461	ame-miR-3730-5p	23	-20.8 kcal/mol	0.999808
410724	protein prickle	LOC410724	XM_006569606.3	3461	ame-miR-3730-5p	23	-20.7 kcal/mol	0.999875
410724	protein prickle	LOC410724	XM_006569606.3	3461	ame-miR-3730-5p	23	-20.4 kcal/mol	0.99997
410724	protein prickle	LOC410724	XM_006569606.3	3461	ame-miR-3730-5p	23	-20.2 kcal/mol	0.99999
410724	protein prickle	LOC410724	XM_006569606.3	3461	ame-miR-3730-5p	23	-20.2 kcal/mol	0.99999
410724	protein prickle	LOC410724	XM_006569606.3	3461	ame-miR-3730-5p	23	-20.0 kcal/mol	0.999997
410724	protein prickle	LOC410724	XM_006569607.3	3147	ame-miR-3730-5p	23	-26.6 kcal/mol	0.362257
410724	protein prickle	LOC410724	XM_006569607.3	3147	ame-miR-3730-5p	23	-24.6 kcal/mol	0.700526
410724	protein prickle	LOC410724	XM_006569607.3	3147	ame-miR-3730-5p	23	-24.5 kcal/mol	0.718229
410724	protein prickle	LOC410724	XM_006569607.3	3147	ame-miR-3730-5p	23	-23.5 kcal/mol	0.874292
410724	protein prickle	LOC410724	XM_006569607.3	3147	ame-miR-3730-5p	23	-23.3 kcal/mol	0.898601
410724	protein prickle	LOC410724	XM_006569607.3	3147	ame-miR-3730-5p	23	-23.1 kcal/mol	0.92001
410724	protein prickle	LOC410724	XM_006569607.3	3147	ame-miR-3730-5p	23	-22.8 kcal/mol	0.946521
410724	protein prickle	LOC410724	XM_006569607.3	3147	ame-miR-3730-5p	23	-22.7 kcal/mol	0.953878
410724	protein prickle	LOC410724	XM_006569607.3	3147	ame-miR-3730-5p	23	-22.7 kcal/mol	0.953878
410724	protein prickle	LOC410724	XM_006569607.3	3147	ame-miR-3730-5p	23	-22.6 kcal/mol	0.960518
410724	protein prickle	LOC410724	XM_006569607.3	3147	ame-miR-3730-5p	23	-21.9 kcal/mol	0.989579
410724	protein prickle	LOC410724	XM_006569607.3	3147	ame-miR-3730-5p	23	-21.8 kcal/mol	0.991725
410724	protein prickle	LOC410724	XM_006569607.3	3147	ame-miR-3730-5p	23	-21.6 kcal/mol	0.994965
410724	protein prickle	LOC410724	XM_006569607.3	3147	ame-miR-3730-5p	23	-21.1 kcal/mol	0.998853
410724	protein prickle	LOC410724	XM_006569607.3	3147	ame-miR-3730-5p	23	-20.8 kcal/mol	0.99961
410724	protein prickle	LOC410724	XM_006569607.3	3147	ame-miR-3730-5p	23	-20.8 kcal/mol	0.99961
410724	protein prickle	LOC410724	XM_006569607.3	3147	ame-miR-3730-5p	23	-20.7 kcal/mol	0.999738
410724	protein prickle	LOC410724	XM_006569607.3	3147	ame-miR-3730-5p	23	-20.4 kcal/mol	0.99993
410724	protein prickle	LOC410724	XM_006569607.3	3147	ame-miR-3730-5p	23	-20.2 kcal/mol	0.999974
410724	protein prickle	LOC410724	XM_006569607.3	3147	ame-miR-3730-5p	23	-20.2 kcal/mol	0.999974
410724	protein prickle	LOC410724	XM_006569610.3	3250	ame-miR-3730-5p	23	-26.6 kcal/mol	0.373164
410724	protein prickle	LOC410724	XM_006569610.3	3250	ame-miR-3730-5p	23	-24.6 kcal/mol	0.713046
410724	protein prickle	LOC410724	XM_006569610.3	3250	ame-miR-3730-5p	23	-24.5 kcal/mol	0.73054
410724	protein prickle	LOC410724	XM_006569610.3	3250	ame-miR-3730-5p	23	-23.6 kcal/mol	0.87011
410724	protein prickle	LOC410724	XM_006569610.3	3250	ame-miR-3730-5p	23	-23.5 kcal/mol	0.882804
410724	protein prickle	LOC410724	XM_006569610.3	3250	ame-miR-3730-5p	23	-23.3 kcal/mol	0.906088
410724	protein prickle	LOC410724	XM_006569610.3	3250	ame-miR-3730-5p	23	-23.1 kcal/mol	0.926449
410724	protein prickle	LOC410724	XM_006569610.3	3250	ame-miR-3730-5p	23	-22.8 kcal/mol	0.951416
410724	protein prickle	LOC410724	XM_006569610.3	3250	ame-miR-3730-5p	23	-22.7 kcal/mol	0.958284
410724	protein prickle	LOC410724	XM_006569610.3	3250	ame-miR-3730-5p	23	-22.7 kcal/mol	0.958284
410724	protein prickle	LOC410724	XM_006569610.3	3250	ame-miR-3730-5p	23	-22.6 kcal/mol	0.964454
410724	protein prickle	LOC410724	XM_006569610.3	3250	ame-miR-3730-5p	23	-21.9 kcal/mol	0.990973
410724	protein prickle	LOC410724	XM_006569610.3	3250	ame-miR-3730-5p	23	-21.8 kcal/mol	0.992879
410724	protein prickle	LOC410724	XM_006569610.3	3250	ame-miR-3730-5p	23	-21.6 kcal/mol	0.995727
410724	protein prickle	LOC410724	XM_006569610.3	3250	ame-miR-3730-5p	23	-21.1 kcal/mol	0.999066
410724	protein prickle	LOC410724	XM_006569610.3	3250	ame-miR-3730-5p	23	-20.9 kcal/mol	0.999546
410724	protein prickle	LOC410724	XM_006569610.3	3250	ame-miR-3730-5p	23	-20.8 kcal/mol	0.999692
410724	protein prickle	LOC410724	XM_006569610.3	3250	ame-miR-3730-5p	23	-20.7 kcal/mol	0.999795
410724	protein prickle	LOC410724	XM_006569610.3	3250	ame-miR-3730-5p	23	-20.4 kcal/mol	0.999947
410724	protein prickle	LOC410724	XM_006569610.3	3250	ame-miR-3730-5p	23	-20.3 kcal/mol	0.999968
410724	protein prickle	LOC410724	XM_006569610.3	3250	ame-miR-3730-5p	23	-20.2 kcal/mol	0.999981
410724	protein prickle	LOC410724	XM_006569610.3	3250	ame-miR-3730-5p	23	-20.2 kcal/mol	0.999981
410724	protein prickle	LOC410724	XM_006569611.3	3475	ame-miR-3730-5p	23	-26.6 kcal/mol	0.39633
410724	protein prickle	LOC410724	XM_006569611.3	3475	ame-miR-3730-5p	23	-24.6 kcal/mol	0.73848
410724	protein prickle	LOC410724	XM_006569611.3	3475	ame-miR-3730-5p	23	-24.5 kcal/mol	0.755469
410724	protein prickle	LOC410724	XM_006569611.3	3475	ame-miR-3730-5p	23	-23.5 kcal/mol	0.89933
410724	protein prickle	LOC410724	XM_006569611.3	3475	ame-miR-3730-5p	23	-23.3 kcal/mol	0.920471
410724	protein prickle	LOC410724	XM_006569611.3	3475	ame-miR-3730-5p	23	-23.1 kcal/mol	0.938674
410724	protein prickle	LOC410724	XM_006569611.3	3475	ame-miR-3730-5p	23	-22.8 kcal/mol	0.960534
410724	protein prickle	LOC410724	XM_006569611.3	3475	ame-miR-3730-5p	23	-22.7 kcal/mol	0.966432
410724	protein prickle	LOC410724	XM_006569611.3	3475	ame-miR-3730-5p	23	-22.7 kcal/mol	0.966432
410724	protein prickle	LOC410724	XM_006569611.3	3475	ame-miR-3730-5p	23	-22.6 kcal/mol	0.971679
410724	protein prickle	LOC410724	XM_006569611.3	3475	ame-miR-3730-5p	23	-22.6 kcal/mol	0.971679
410724	protein prickle	LOC410724	XM_006569611.3	3475	ame-miR-3730-5p	23	-21.9 kcal/mol	0.993381
410724	protein prickle	LOC410724	XM_006569611.3	3475	ame-miR-3730-5p	23	-21.8 kcal/mol	0.994852
410724	protein prickle	LOC410724	XM_006569611.3	3475	ame-miR-3730-5p	23	-21.8 kcal/mol	0.994852
410724	protein prickle	LOC410724	XM_006569611.3	3475	ame-miR-3730-5p	23	-21.6 kcal/mol	0.997003
410724	protein prickle	LOC410724	XM_006569611.3	3475	ame-miR-3730-5p	23	-21.2 kcal/mol	0.999145
410724	protein prickle	LOC410724	XM_006569611.3	3475	ame-miR-3730-5p	23	-21.1 kcal/mol	0.9994
410724	protein prickle	LOC410724	XM_006569611.3	3475	ame-miR-3730-5p	23	-20.8 kcal/mol	0.999814
410724	protein prickle	LOC410724	XM_006569611.3	3475	ame-miR-3730-5p	23	-20.7 kcal/mol	0.999879
410724	protein prickle	LOC410724	XM_006569611.3	3475	ame-miR-3730-5p	23	-20.4 kcal/mol	0.999971
410724	protein prickle	LOC410724	XM_006569611.3	3475	ame-miR-3730-5p	23	-20.2 kcal/mol	0.99999
410724	protein prickle	LOC410724	XM_006569611.3	3475	ame-miR-3730-5p	23	-20.2 kcal/mol	0.99999
410724	protein prickle	LOC410724	XM_006569611.3	3475	ame-miR-3730-5p	23	-20.0 kcal/mol	0.999997
410724	protein prickle	LOC410724	XM_026446342.1	3101	ame-miR-3730-5p	23	-26.6 kcal/mol	0.357323
410724	protein prickle	LOC410724	XM_026446342.1	3101	ame-miR-3730-5p	23	-24.6 kcal/mol	0.694747
410724	protein prickle	LOC410724	XM_026446342.1	3101	ame-miR-3730-5p	23	-24.5 kcal/mol	0.712537
410724	protein prickle	LOC410724	XM_026446342.1	3101	ame-miR-3730-5p	23	-23.5 kcal/mol	0.87028
410724	protein prickle	LOC410724	XM_026446342.1	3101	ame-miR-3730-5p	23	-23.3 kcal/mol	0.895054
410724	protein prickle	LOC410724	XM_026446342.1	3101	ame-miR-3730-5p	23	-23.1 kcal/mol	0.916943
410724	protein prickle	LOC410724	XM_026446342.1	3101	ame-miR-3730-5p	23	-22.8 kcal/mol	0.944168
410724	protein prickle	LOC410724	XM_026446342.1	3101	ame-miR-3730-5p	23	-22.7 kcal/mol	0.951753
410724	protein prickle	LOC410724	XM_026446342.1	3101	ame-miR-3730-5p	23	-22.7 kcal/mol	0.951753
410724	protein prickle	LOC410724	XM_026446342.1	3101	ame-miR-3730-5p	23	-22.6 kcal/mol	0.958614
410724	protein prickle	LOC410724	XM_026446342.1	3101	ame-miR-3730-5p	23	-21.9 kcal/mol	0.988885
410724	protein prickle	LOC410724	XM_026446342.1	3101	ame-miR-3730-5p	23	-21.8 kcal/mol	0.991148
410724	protein prickle	LOC410724	XM_026446342.1	3101	ame-miR-3730-5p	23	-21.6 kcal/mol	0.99458
410724	protein prickle	LOC410724	XM_026446342.1	3101	ame-miR-3730-5p	23	-21.1 kcal/mol	0.998742
410724	protein prickle	LOC410724	XM_026446342.1	3101	ame-miR-3730-5p	23	-20.8 kcal/mol	0.999567
410724	protein prickle	LOC410724	XM_026446342.1	3101	ame-miR-3730-5p	23	-20.7 kcal/mol	0.999707
410724	protein prickle	LOC410724	XM_026446342.1	3101	ame-miR-3730-5p	23	-20.4 kcal/mol	0.99992
410724	protein prickle	LOC410724	XM_026446342.1	3101	ame-miR-3730-5p	23	-20.2 kcal/mol	0.99997
410724	protein prickle	LOC410724	XM_026446342.1	3101	ame-miR-3730-5p	23	-20.2 kcal/mol	0.99997
410724	protein prickle	LOC410724	XM_026446342.1	3101	ame-miR-3730-5p	23	-20.0 kcal/mol	0.99999
410724	protein prickle	LOC410724	XM_394201.6	4708	ame-miR-3730-5p	23	-26.6 kcal/mol	0.508095
410724	protein prickle	LOC410724	XM_394201.6	4708	ame-miR-3730-5p	23	-24.6 kcal/mol	0.840811
410724	protein prickle	LOC410724	XM_394201.6	4708	ame-miR-3730-5p	23	-24.5 kcal/mol	0.854448
410724	protein prickle	LOC410724	XM_394201.6	4708	ame-miR-3730-5p	23	-23.5 kcal/mol	0.955027
410724	protein prickle	LOC410724	XM_394201.6	4708	ame-miR-3730-5p	23	-23.3 kcal/mol	0.967005
410724	protein prickle	LOC410724	XM_394201.6	4708	ame-miR-3730-5p	23	-23.1 kcal/mol	0.97653
410724	protein prickle	LOC410724	XM_394201.6	4708	ame-miR-3730-5p	23	-22.8 kcal/mol	0.986803
410724	protein prickle	LOC410724	XM_394201.6	4708	ame-miR-3730-5p	23	-22.7 kcal/mol	0.989313
410724	protein prickle	LOC410724	XM_394201.6	4708	ame-miR-3730-5p	23	-22.7 kcal/mol	0.989313
410724	protein prickle	LOC410724	XM_394201.6	4708	ame-miR-3730-5p	23	-22.6 kcal/mol	0.991434
410724	protein prickle	LOC410724	XM_394201.6	4708	ame-miR-3730-5p	23	-22.6 kcal/mol	0.991434
410724	protein prickle	LOC410724	XM_394201.6	4708	ame-miR-3730-5p	23	-22.3 kcal/mol	0.995874
410724	protein prickle	LOC410724	XM_394201.6	4708	ame-miR-3730-5p	23	-22.0 kcal/mol	0.998223
410724	protein prickle	LOC410724	XM_394201.6	4708	ame-miR-3730-5p	23	-21.9 kcal/mol	0.998695
410724	protein prickle	LOC410724	XM_394201.6	4708	ame-miR-3730-5p	23	-21.8 kcal/mol	0.999056
410724	protein prickle	LOC410724	XM_394201.6	4708	ame-miR-3730-5p	23	-21.6 kcal/mol	0.999529
410724	protein prickle	LOC410724	XM_394201.6	4708	ame-miR-3730-5p	23	-21.3 kcal/mol	0.999855
410724	protein prickle	LOC410724	XM_394201.6	4708	ame-miR-3730-5p	23	-21.3 kcal/mol	0.999855
410724	protein prickle	LOC410724	XM_394201.6	4708	ame-miR-3730-5p	23	-21.1 kcal/mol	0.99994
410724	protein prickle	LOC410724	XM_394201.6	4708	ame-miR-3730-5p	23	-21.1 kcal/mol	0.99994
410724	protein prickle	LOC410724	XM_394201.6	4708	ame-miR-3730-5p	23	-20.8 kcal/mol	0.999986
410724	protein prickle	LOC410724	XM_394201.6	4708	ame-miR-3730-5p	23	-20.7 kcal/mol	0.999992
410724	protein prickle	LOC410724	XM_394201.6	4708	ame-miR-3730-5p	23	-20.4 kcal/mol	0.999999
410724	protein prickle	LOC410724	XM_394201.6	4708	ame-miR-3730-5p	23	-20.2 kcal/mol	1
410724	protein prickle	LOC410724	XM_394201.6	4708	ame-miR-3730-5p	23	-20.2 kcal/mol	1
410724	protein prickle	LOC410724	XM_394201.6	4708	ame-miR-3730-5p	23	-20.1 kcal/mol	1
410808	E3 ubiquitin-protein ligase Siah1	LOC410808	XM_006568762.3	1742	ame-miR-3730-5p	23	-25.6 kcal/mol	0.305214
410808	E3 ubiquitin-protein ligase Siah1	LOC410808	XM_006568762.3	1742	ame-miR-3730-5p	23	-23.5 kcal/mol	0.662575
410808	E3 ubiquitin-protein ligase Siah1	LOC410808	XM_006568762.3	1742	ame-miR-3730-5p	23	-23.0 kcal/mol	0.7557
410808	E3 ubiquitin-protein ligase Siah1	LOC410808	XM_006568762.3	1742	ame-miR-3730-5p	23	-21.3 kcal/mol	0.967103
410808	E3 ubiquitin-protein ligase Siah1	LOC410808	XM_006568762.3	1742	ame-miR-3730-5p	23	-21.0 kcal/mol	0.981527
410808	E3 ubiquitin-protein ligase Siah1	LOC410808	XM_006568762.3	1742	ame-miR-3730-5p	23	-20.6 kcal/mol	0.992666
410808	E3 ubiquitin-protein ligase Siah1	LOC410808	XM_006568762.3	1742	ame-miR-3730-5p	23	-20.5 kcal/mol	0.99436
410808	E3 ubiquitin-protein ligase Siah1	LOC410808	XM_026446480.1	1197	ame-miR-3730-5p	23	-23.5 kcal/mol	0.500154
410808	E3 ubiquitin-protein ligase Siah1	LOC410808	XM_026446480.1	1197	ame-miR-3730-5p	23	-23.0 kcal/mol	0.596762
410808	E3 ubiquitin-protein ligase Siah1	LOC410808	XM_026446480.1	1197	ame-miR-3730-5p	23	-20.5 kcal/mol	0.969803
410808	E3 ubiquitin-protein ligase Siah1	LOC410808	XM_394284.5	2139	ame-miR-3730-5p	23	-25.6 kcal/mol	0.374427
410808	E3 ubiquitin-protein ligase Siah1	LOC410808	XM_394284.5	2139	ame-miR-3730-5p	23	-23.5 kcal/mol	0.746073
410808	E3 ubiquitin-protein ligase Siah1	LOC410808	XM_394284.5	2139	ame-miR-3730-5p	23	-23.0 kcal/mol	0.829563
410808	E3 ubiquitin-protein ligase Siah1	LOC410808	XM_394284.5	2139	ame-miR-3730-5p	23	-21.3 kcal/mol	0.98523
410808	E3 ubiquitin-protein ligase Siah1	LOC410808	XM_394284.5	2139	ame-miR-3730-5p	23	-21.0 kcal/mol	0.992649
410808	E3 ubiquitin-protein ligase Siah1	LOC410808	XM_394284.5	2139	ame-miR-3730-5p	23	-20.6 kcal/mol	0.997585
410808	E3 ubiquitin-protein ligase Siah1	LOC410808	XM_394284.5	2139	ame-miR-3730-5p	23	-20.5 kcal/mol	0.998239
410956	serine/threonine-protein kinase NLK	LOC410956	XM_016911230.2	3732	ame-miR-3730-5p	23	-28.8 kcal/mol	0.171526
410956	serine/threonine-protein kinase NLK	LOC410956	XM_016911230.2	3732	ame-miR-3730-5p	23	-24.2 kcal/mol	0.827356
410956	serine/threonine-protein kinase NLK	LOC410956	XM_016911230.2	3732	ame-miR-3730-5p	23	-24.0 kcal/mol	0.855673
410956	serine/threonine-protein kinase NLK	LOC410956	XM_016911230.2	3732	ame-miR-3730-5p	23	-24.0 kcal/mol	0.855673
410956	serine/threonine-protein kinase NLK	LOC410956	XM_016911230.2	3732	ame-miR-3730-5p	23	-23.9 kcal/mol	0.868926
410956	serine/threonine-protein kinase NLK	LOC410956	XM_016911230.2	3732	ame-miR-3730-5p	23	-23.2 kcal/mol	0.942422
410956	serine/threonine-protein kinase NLK	LOC410956	XM_016911230.2	3732	ame-miR-3730-5p	23	-23.1 kcal/mol	0.950046
410956	serine/threonine-protein kinase NLK	LOC410956	XM_016911230.2	3732	ame-miR-3730-5p	23	-22.5 kcal/mol	0.981871
410956	serine/threonine-protein kinase NLK	LOC410956	XM_016911230.2	3732	ame-miR-3730-5p	23	-22.3 kcal/mol	0.987957
410956	serine/threonine-protein kinase NLK	LOC410956	XM_016911230.2	3732	ame-miR-3730-5p	23	-22.0 kcal/mol	0.993978
410956	serine/threonine-protein kinase NLK	LOC410956	XM_016911230.2	3732	ame-miR-3730-5p	23	-21.9 kcal/mol	0.99533
410956	serine/threonine-protein kinase NLK	LOC410956	XM_016911230.2	3732	ame-miR-3730-5p	23	-21.8 kcal/mol	0.996425
410956	serine/threonine-protein kinase NLK	LOC410956	XM_016911230.2	3732	ame-miR-3730-5p	23	-21.6 kcal/mol	0.997987
410956	serine/threonine-protein kinase NLK	LOC410956	XM_016911230.2	3732	ame-miR-3730-5p	23	-20.9 kcal/mol	0.999837
410956	serine/threonine-protein kinase NLK	LOC410956	XM_016911230.2	3732	ame-miR-3730-5p	23	-20.4 kcal/mol	0.999985
410956	serine/threonine-protein kinase NLK	LOC410956	XM_016911230.2	3732	ame-miR-3730-5p	23	-20.3 kcal/mol	0.999991
410956	serine/threonine-protein kinase NLK	LOC410956	XM_016911230.2	3732	ame-miR-3730-5p	23	-20.2 kcal/mol	0.999995
410956	serine/threonine-protein kinase NLK	LOC410956	XM_016911230.2	3732	ame-miR-3730-5p	23	-20.0 kcal/mol	0.999999
410956	serine/threonine-protein kinase NLK	LOC410956	XM_016911231.2	3164	ame-miR-3730-5p	23	-28.8 kcal/mol	0.141955
410956	serine/threonine-protein kinase NLK	LOC410956	XM_016911231.2	3164	ame-miR-3730-5p	23	-24.2 kcal/mol	0.771682
410956	serine/threonine-protein kinase NLK	LOC410956	XM_016911231.2	3164	ame-miR-3730-5p	23	-24.0 kcal/mol	0.804069
410956	serine/threonine-protein kinase NLK	LOC410956	XM_016911231.2	3164	ame-miR-3730-5p	23	-24.0 kcal/mol	0.804069
410956	serine/threonine-protein kinase NLK	LOC410956	XM_016911231.2	3164	ame-miR-3730-5p	23	-23.9 kcal/mol	0.819554
410956	serine/threonine-protein kinase NLK	LOC410956	XM_016911231.2	3164	ame-miR-3730-5p	23	-23.1 kcal/mol	0.921113
410956	serine/threonine-protein kinase NLK	LOC410956	XM_016911231.2	3164	ame-miR-3730-5p	23	-22.5 kcal/mol	0.967072
410956	serine/threonine-protein kinase NLK	LOC410956	XM_016911231.2	3164	ame-miR-3730-5p	23	-22.3 kcal/mol	0.976878
410956	serine/threonine-protein kinase NLK	LOC410956	XM_016911231.2	3164	ame-miR-3730-5p	23	-22.0 kcal/mol	0.987312
410956	serine/threonine-protein kinase NLK	LOC410956	XM_016911231.2	3164	ame-miR-3730-5p	23	-21.9 kcal/mol	0.989823
410956	serine/threonine-protein kinase NLK	LOC410956	XM_016911231.2	3164	ame-miR-3730-5p	23	-21.8 kcal/mol	0.991928
410956	serine/threonine-protein kinase NLK	LOC410956	XM_016911231.2	3164	ame-miR-3730-5p	23	-21.8 kcal/mol	0.991928
410956	serine/threonine-protein kinase NLK	LOC410956	XM_016911231.2	3164	ame-miR-3730-5p	23	-21.6 kcal/mol	0.9951
410956	serine/threonine-protein kinase NLK	LOC410956	XM_016911231.2	3164	ame-miR-3730-5p	23	-20.9 kcal/mol	0.999452
410956	serine/threonine-protein kinase NLK	LOC410956	XM_016911231.2	3164	ame-miR-3730-5p	23	-20.3 kcal/mol	0.999959
410956	serine/threonine-protein kinase NLK	LOC410956	XM_016911231.2	3164	ame-miR-3730-5p	23	-20.2 kcal/mol	0.999975
410956	serine/threonine-protein kinase NLK	LOC410956	XM_016911231.2	3164	ame-miR-3730-5p	23	-20.0 kcal/mol	0.999992
410956	serine/threonine-protein kinase NLK	LOC410956	XM_016911232.2	9578	ame-miR-3730-5p	23	-28.8 kcal/mol	0.422685
410956	serine/threonine-protein kinase NLK	LOC410956	XM_016911232.2	9578	ame-miR-3730-5p	23	-24.2 kcal/mol	0.986722
410956	serine/threonine-protein kinase NLK	LOC410956	XM_016911232.2	9578	ame-miR-3730-5p	23	-24.0 kcal/mol	0.991148
410956	serine/threonine-protein kinase NLK	LOC410956	XM_016911232.2	9578	ame-miR-3730-5p	23	-24.0 kcal/mol	0.991148
410956	serine/threonine-protein kinase NLK	LOC410956	XM_016911232.2	9578	ame-miR-3730-5p	23	-23.9 kcal/mol	0.992873
410956	serine/threonine-protein kinase NLK	LOC410956	XM_016911232.2	9578	ame-miR-3730-5p	23	-23.1 kcal/mol	0.999156
410956	serine/threonine-protein kinase NLK	LOC410956	XM_016911232.2	9578	ame-miR-3730-5p	23	-22.9 kcal/mol	0.999565
410956	serine/threonine-protein kinase NLK	LOC410956	XM_016911232.2	9578	ame-miR-3730-5p	23	-22.5 kcal/mol	0.999905
410956	serine/threonine-protein kinase NLK	LOC410956	XM_016911232.2	9578	ame-miR-3730-5p	23	-22.4 kcal/mol	0.999938
410956	serine/threonine-protein kinase NLK	LOC410956	XM_016911232.2	9578	ame-miR-3730-5p	23	-22.3 kcal/mol	0.99996
410956	serine/threonine-protein kinase NLK	LOC410956	XM_016911232.2	9578	ame-miR-3730-5p	23	-22.0 kcal/mol	0.999991
410956	serine/threonine-protein kinase NLK	LOC410956	XM_016911232.2	9578	ame-miR-3730-5p	23	-21.9 kcal/mol	0.999995
410956	serine/threonine-protein kinase NLK	LOC410956	XM_016911232.2	9578	ame-miR-3730-5p	23	-21.8 kcal/mol	0.999997
410956	serine/threonine-protein kinase NLK	LOC410956	XM_016911232.2	9578	ame-miR-3730-5p	23	-21.8 kcal/mol	0.999997
410956	serine/threonine-protein kinase NLK	LOC410956	XM_016911232.2	9578	ame-miR-3730-5p	23	-21.8 kcal/mol	0.999997
410956	serine/threonine-protein kinase NLK	LOC410956	XM_016911232.2	9578	ame-miR-3730-5p	23	-21.7 kcal/mol	0.999998
410956	serine/threonine-protein kinase NLK	LOC410956	XM_016911232.2	9578	ame-miR-3730-5p	23	-21.6 kcal/mol	0.999999
410956	serine/threonine-protein kinase NLK	LOC410956	XM_016911232.2	9578	ame-miR-3730-5p	23	-21.3 kcal/mol	1
410956	serine/threonine-protein kinase NLK	LOC410956	XM_016911232.2	9578	ame-miR-3730-5p	23	-21.1 kcal/mol	1
410956	serine/threonine-protein kinase NLK	LOC410956	XM_016911232.2	9578	ame-miR-3730-5p	23	-20.9 kcal/mol	1
410956	serine/threonine-protein kinase NLK	LOC410956	XM_016911232.2	9578	ame-miR-3730-5p	23	-20.9 kcal/mol	1
410956	serine/threonine-protein kinase NLK	LOC410956	XM_016911232.2	9578	ame-miR-3730-5p	23	-20.9 kcal/mol	1
410956	serine/threonine-protein kinase NLK	LOC410956	XM_016911232.2	9578	ame-miR-3730-5p	23	-20.5 kcal/mol	1
410956	serine/threonine-protein kinase NLK	LOC410956	XM_016911232.2	9578	ame-miR-3730-5p	23	-20.4 kcal/mol	1
410956	serine/threonine-protein kinase NLK	LOC410956	XM_016911232.2	9578	ame-miR-3730-5p	23	-20.4 kcal/mol	1
410956	serine/threonine-protein kinase NLK	LOC410956	XM_016911232.2	9578	ame-miR-3730-5p	23	-20.3 kcal/mol	1
410956	serine/threonine-protein kinase NLK	LOC410956	XM_016911232.2	9578	ame-miR-3730-5p	23	-20.3 kcal/mol	1
410956	serine/threonine-protein kinase NLK	LOC410956	XM_016911232.2	9578	ame-miR-3730-5p	23	-20.2 kcal/mol	1
410956	serine/threonine-protein kinase NLK	LOC410956	XM_016911232.2	9578	ame-miR-3730-5p	23	-20.2 kcal/mol	1
410956	serine/threonine-protein kinase NLK	LOC410956	XM_016911232.2	9578	ame-miR-3730-5p	23	-20.1 kcal/mol	1
410956	serine/threonine-protein kinase NLK	LOC410956	XM_016911232.2	9578	ame-miR-3730-5p	23	-20.0 kcal/mol	1
410956	serine/threonine-protein kinase NLK	LOC410956	XM_016911232.2	9578	ame-miR-3730-5p	23	-20.0 kcal/mol	1
410956	serine/threonine-protein kinase NLK	LOC410956	XM_016911234.2	2137	ame-miR-3730-5p	23	-28.8 kcal/mol	0.087372
410956	serine/threonine-protein kinase NLK	LOC410956	XM_016911234.2	2137	ame-miR-3730-5p	23	-24.2 kcal/mol	0.616243
410956	serine/threonine-protein kinase NLK	LOC410956	XM_016911234.2	2137	ame-miR-3730-5p	23	-23.9 kcal/mol	0.672512
410956	serine/threonine-protein kinase NLK	LOC410956	XM_016911234.2	2137	ame-miR-3730-5p	23	-23.2 kcal/mol	0.79729
410956	serine/threonine-protein kinase NLK	LOC410956	XM_016911234.2	2137	ame-miR-3730-5p	23	-23.1 kcal/mol	0.81355
410956	serine/threonine-protein kinase NLK	LOC410956	XM_016911234.2	2137	ame-miR-3730-5p	23	-22.5 kcal/mol	0.897896
410956	serine/threonine-protein kinase NLK	LOC410956	XM_016911234.2	2137	ame-miR-3730-5p	23	-22.5 kcal/mol	0.897896
410956	serine/threonine-protein kinase NLK	LOC410956	XM_016911234.2	2137	ame-miR-3730-5p	23	-21.6 kcal/mol	0.973029
410956	serine/threonine-protein kinase NLK	LOC410956	XM_016911234.2	2137	ame-miR-3730-5p	23	-20.4 kcal/mol	0.998729
410956	serine/threonine-protein kinase NLK	LOC410956	XM_016911234.2	2137	ame-miR-3730-5p	23	-20.0 kcal/mol	0.99972
410956	serine/threonine-protein kinase NLK	LOC410956	XM_016911235.2	2390	ame-miR-3730-5p	23	-28.8 kcal/mol	0.10085
410956	serine/threonine-protein kinase NLK	LOC410956	XM_016911235.2	2390	ame-miR-3730-5p	23	-26.7 kcal/mol	0.264543
410956	serine/threonine-protein kinase NLK	LOC410956	XM_016911235.2	2390	ame-miR-3730-5p	23	-24.2 kcal/mol	0.662807
410956	serine/threonine-protein kinase NLK	LOC410956	XM_016911235.2	2390	ame-miR-3730-5p	23	-23.9 kcal/mol	0.717785
410956	serine/threonine-protein kinase NLK	LOC410956	XM_016911235.2	2390	ame-miR-3730-5p	23	-23.2 kcal/mol	0.835044
410956	serine/threonine-protein kinase NLK	LOC410956	XM_016911235.2	2390	ame-miR-3730-5p	23	-23.1 kcal/mol	0.849757
410956	serine/threonine-protein kinase NLK	LOC410956	XM_016911235.2	2390	ame-miR-3730-5p	23	-22.5 kcal/mol	0.923234
410956	serine/threonine-protein kinase NLK	LOC410956	XM_016911235.2	2390	ame-miR-3730-5p	23	-21.6 kcal/mol	0.9825
410956	serine/threonine-protein kinase NLK	LOC410956	XM_016911235.2	2390	ame-miR-3730-5p	23	-20.4 kcal/mol	0.999401
410956	serine/threonine-protein kinase NLK	LOC410956	XM_016911235.2	2390	ame-miR-3730-5p	23	-20.0 kcal/mol	0.999886
410956	serine/threonine-protein kinase NLK	LOC410956	XM_016911236.2	2350	ame-miR-3730-5p	23	-28.8 kcal/mol	0.098717
410956	serine/threonine-protein kinase NLK	LOC410956	XM_016911236.2	2350	ame-miR-3730-5p	23	-26.7 kcal/mol	0.259855
410956	serine/threonine-protein kinase NLK	LOC410956	XM_016911236.2	2350	ame-miR-3730-5p	23	-24.2 kcal/mol	0.655858
410956	serine/threonine-protein kinase NLK	LOC410956	XM_016911236.2	2350	ame-miR-3730-5p	23	-23.9 kcal/mol	0.71109
410956	serine/threonine-protein kinase NLK	LOC410956	XM_016911236.2	2350	ame-miR-3730-5p	23	-23.2 kcal/mol	0.829606
410956	serine/threonine-protein kinase NLK	LOC410956	XM_016911236.2	2350	ame-miR-3730-5p	23	-23.1 kcal/mol	0.844565
410956	serine/threonine-protein kinase NLK	LOC410956	XM_016911236.2	2350	ame-miR-3730-5p	23	-22.5 kcal/mol	0.919716
410956	serine/threonine-protein kinase NLK	LOC410956	XM_016911236.2	2350	ame-miR-3730-5p	23	-21.6 kcal/mol	0.981272
410956	serine/threonine-protein kinase NLK	LOC410956	XM_016911236.2	2350	ame-miR-3730-5p	23	-20.4 kcal/mol	0.999326
410956	serine/threonine-protein kinase NLK	LOC410956	XM_016911236.2	2350	ame-miR-3730-5p	23	-20.0 kcal/mol	0.999869
410956	serine/threonine-protein kinase NLK	LOC410956	XM_394432.7	9671	ame-miR-3730-5p	23	-28.8 kcal/mol	0.425906
410956	serine/threonine-protein kinase NLK	LOC410956	XM_394432.7	9671	ame-miR-3730-5p	23	-24.2 kcal/mol	0.987203
410956	serine/threonine-protein kinase NLK	LOC410956	XM_394432.7	9671	ame-miR-3730-5p	23	-24.0 kcal/mol	0.991496
410956	serine/threonine-protein kinase NLK	LOC410956	XM_394432.7	9671	ame-miR-3730-5p	23	-24.0 kcal/mol	0.991496
410956	serine/threonine-protein kinase NLK	LOC410956	XM_394432.7	9671	ame-miR-3730-5p	23	-23.9 kcal/mol	0.993164
410956	serine/threonine-protein kinase NLK	LOC410956	XM_394432.7	9671	ame-miR-3730-5p	23	-23.1 kcal/mol	0.999203
410956	serine/threonine-protein kinase NLK	LOC410956	XM_394432.7	9671	ame-miR-3730-5p	23	-22.9 kcal/mol	0.999592
410956	serine/threonine-protein kinase NLK	LOC410956	XM_394432.7	9671	ame-miR-3730-5p	23	-22.5 kcal/mol	0.999912
410956	serine/threonine-protein kinase NLK	LOC410956	XM_394432.7	9671	ame-miR-3730-5p	23	-22.4 kcal/mol	0.999942
410956	serine/threonine-protein kinase NLK	LOC410956	XM_394432.7	9671	ame-miR-3730-5p	23	-22.3 kcal/mol	0.999963
410956	serine/threonine-protein kinase NLK	LOC410956	XM_394432.7	9671	ame-miR-3730-5p	23	-22.0 kcal/mol	0.999992
410956	serine/threonine-protein kinase NLK	LOC410956	XM_394432.7	9671	ame-miR-3730-5p	23	-21.9 kcal/mol	0.999995
410956	serine/threonine-protein kinase NLK	LOC410956	XM_394432.7	9671	ame-miR-3730-5p	23	-21.8 kcal/mol	0.999997
410956	serine/threonine-protein kinase NLK	LOC410956	XM_394432.7	9671	ame-miR-3730-5p	23	-21.8 kcal/mol	0.999997
410956	serine/threonine-protein kinase NLK	LOC410956	XM_394432.7	9671	ame-miR-3730-5p	23	-21.8 kcal/mol	0.999997
410956	serine/threonine-protein kinase NLK	LOC410956	XM_394432.7	9671	ame-miR-3730-5p	23	-21.7 kcal/mol	0.999998
410956	serine/threonine-protein kinase NLK	LOC410956	XM_394432.7	9671	ame-miR-3730-5p	23	-21.6 kcal/mol	0.999999
410956	serine/threonine-protein kinase NLK	LOC410956	XM_394432.7	9671	ame-miR-3730-5p	23	-21.3 kcal/mol	1
410956	serine/threonine-protein kinase NLK	LOC410956	XM_394432.7	9671	ame-miR-3730-5p	23	-21.1 kcal/mol	1
410956	serine/threonine-protein kinase NLK	LOC410956	XM_394432.7	9671	ame-miR-3730-5p	23	-20.9 kcal/mol	1
410956	serine/threonine-protein kinase NLK	LOC410956	XM_394432.7	9671	ame-miR-3730-5p	23	-20.9 kcal/mol	1
410956	serine/threonine-protein kinase NLK	LOC410956	XM_394432.7	9671	ame-miR-3730-5p	23	-20.9 kcal/mol	1
410956	serine/threonine-protein kinase NLK	LOC410956	XM_394432.7	9671	ame-miR-3730-5p	23	-20.5 kcal/mol	1
410956	serine/threonine-protein kinase NLK	LOC410956	XM_394432.7	9671	ame-miR-3730-5p	23	-20.4 kcal/mol	1
410956	serine/threonine-protein kinase NLK	LOC410956	XM_394432.7	9671	ame-miR-3730-5p	23	-20.4 kcal/mol	1
410956	serine/threonine-protein kinase NLK	LOC410956	XM_394432.7	9671	ame-miR-3730-5p	23	-20.3 kcal/mol	1
410956	serine/threonine-protein kinase NLK	LOC410956	XM_394432.7	9671	ame-miR-3730-5p	23	-20.3 kcal/mol	1
410956	serine/threonine-protein kinase NLK	LOC410956	XM_394432.7	9671	ame-miR-3730-5p	23	-20.2 kcal/mol	1
410956	serine/threonine-protein kinase NLK	LOC410956	XM_394432.7	9671	ame-miR-3730-5p	23	-20.2 kcal/mol	1
410956	serine/threonine-protein kinase NLK	LOC410956	XM_394432.7	9671	ame-miR-3730-5p	23	-20.1 kcal/mol	1
410956	serine/threonine-protein kinase NLK	LOC410956	XM_394432.7	9671	ame-miR-3730-5p	23	-20.0 kcal/mol	1
410956	serine/threonine-protein kinase NLK	LOC410956	XM_394432.7	9671	ame-miR-3730-5p	23	-20.0 kcal/mol	1
411046	serine/threonine-protein phosphatase 2B catalytic subunit 2	LOC411046	XM_026440048.1	2768	ame-miR-3730-5p	23	-29.9 kcal/mol	0.071803
411046	serine/threonine-protein phosphatase 2B catalytic subunit 2	LOC411046	XM_026440048.1	2768	ame-miR-3730-5p	23	-26.3 kcal/mol	0.361534
411046	serine/threonine-protein phosphatase 2B catalytic subunit 2	LOC411046	XM_026440048.1	2768	ame-miR-3730-5p	23	-25.6 kcal/mol	0.470672
411046	serine/threonine-protein phosphatase 2B catalytic subunit 2	LOC411046	XM_026440048.1	2768	ame-miR-3730-5p	23	-25.3 kcal/mol	0.522319
411046	serine/threonine-protein phosphatase 2B catalytic subunit 2	LOC411046	XM_026440048.1	2768	ame-miR-3730-5p	23	-24.6 kcal/mol	0.64918
411046	serine/threonine-protein phosphatase 2B catalytic subunit 2	LOC411046	XM_026440048.1	2768	ame-miR-3730-5p	23	-24.1 kcal/mol	0.739234
411046	serine/threonine-protein phosphatase 2B catalytic subunit 2	LOC411046	XM_026440048.1	2768	ame-miR-3730-5p	23	-23.3 kcal/mol	0.86509
411046	serine/threonine-protein phosphatase 2B catalytic subunit 2	LOC411046	XM_026440048.1	2768	ame-miR-3730-5p	23	-22.9 kcal/mol	0.913308
411046	serine/threonine-protein phosphatase 2B catalytic subunit 2	LOC411046	XM_026440048.1	2768	ame-miR-3730-5p	23	-22.7 kcal/mol	0.932921
411046	serine/threonine-protein phosphatase 2B catalytic subunit 2	LOC411046	XM_026440048.1	2768	ame-miR-3730-5p	23	-22.6 kcal/mol	0.941577
411046	serine/threonine-protein phosphatase 2B catalytic subunit 2	LOC411046	XM_026440048.1	2768	ame-miR-3730-5p	23	-22.4 kcal/mol	0.956628
411046	serine/threonine-protein phosphatase 2B catalytic subunit 2	LOC411046	XM_026440048.1	2768	ame-miR-3730-5p	23	-21.2 kcal/mol	0.996684
411046	serine/threonine-protein phosphatase 2B catalytic subunit 2	LOC411046	XM_026440048.1	2768	ame-miR-3730-5p	23	-21.1 kcal/mol	0.997523
411046	serine/threonine-protein phosphatase 2B catalytic subunit 2	LOC411046	XM_026440048.1	2768	ame-miR-3730-5p	23	-20.9 kcal/mol	0.99868
411046	serine/threonine-protein phosphatase 2B catalytic subunit 2	LOC411046	XM_026440048.1	2768	ame-miR-3730-5p	23	-20.8 kcal/mol	0.99906
411046	serine/threonine-protein phosphatase 2B catalytic subunit 2	LOC411046	XM_026440048.1	2768	ame-miR-3730-5p	23	-20.8 kcal/mol	0.99906
411046	serine/threonine-protein phosphatase 2B catalytic subunit 2	LOC411046	XM_026440048.1	2768	ame-miR-3730-5p	23	-20.4 kcal/mol	0.999798
411046	serine/threonine-protein phosphatase 2B catalytic subunit 2	LOC411046	XM_026440049.1	2752	ame-miR-3730-5p	23	-29.9 kcal/mol	0.071264
411046	serine/threonine-protein phosphatase 2B catalytic subunit 2	LOC411046	XM_026440049.1	2752	ame-miR-3730-5p	23	-26.3 kcal/mol	0.359568
411046	serine/threonine-protein phosphatase 2B catalytic subunit 2	LOC411046	XM_026440049.1	2752	ame-miR-3730-5p	23	-25.6 kcal/mol	0.46842
411046	serine/threonine-protein phosphatase 2B catalytic subunit 2	LOC411046	XM_026440049.1	2752	ame-miR-3730-5p	23	-25.3 kcal/mol	0.519986
411046	serine/threonine-protein phosphatase 2B catalytic subunit 2	LOC411046	XM_026440049.1	2752	ame-miR-3730-5p	23	-24.6 kcal/mol	0.646815
411046	serine/threonine-protein phosphatase 2B catalytic subunit 2	LOC411046	XM_026440049.1	2752	ame-miR-3730-5p	23	-24.1 kcal/mol	0.737022
411046	serine/threonine-protein phosphatase 2B catalytic subunit 2	LOC411046	XM_026440049.1	2752	ame-miR-3730-5p	23	-24.1 kcal/mol	0.737022
411046	serine/threonine-protein phosphatase 2B catalytic subunit 2	LOC411046	XM_026440049.1	2752	ame-miR-3730-5p	23	-23.3 kcal/mol	0.863438
411046	serine/threonine-protein phosphatase 2B catalytic subunit 2	LOC411046	XM_026440049.1	2752	ame-miR-3730-5p	23	-22.9 kcal/mol	0.912033
411046	serine/threonine-protein phosphatase 2B catalytic subunit 2	LOC411046	XM_026440049.1	2752	ame-miR-3730-5p	23	-22.7 kcal/mol	0.93184
411046	serine/threonine-protein phosphatase 2B catalytic subunit 2	LOC411046	XM_026440049.1	2752	ame-miR-3730-5p	23	-22.6 kcal/mol	0.940591
411046	serine/threonine-protein phosphatase 2B catalytic subunit 2	LOC411046	XM_026440049.1	2752	ame-miR-3730-5p	23	-22.4 kcal/mol	0.955825
411046	serine/threonine-protein phosphatase 2B catalytic subunit 2	LOC411046	XM_026440049.1	2752	ame-miR-3730-5p	23	-21.2 kcal/mol	0.996577
411046	serine/threonine-protein phosphatase 2B catalytic subunit 2	LOC411046	XM_026440049.1	2752	ame-miR-3730-5p	23	-21.1 kcal/mol	0.99744
411046	serine/threonine-protein phosphatase 2B catalytic subunit 2	LOC411046	XM_026440049.1	2752	ame-miR-3730-5p	23	-20.9 kcal/mol	0.998632
411046	serine/threonine-protein phosphatase 2B catalytic subunit 2	LOC411046	XM_026440049.1	2752	ame-miR-3730-5p	23	-20.8 kcal/mol	0.999023
411046	serine/threonine-protein phosphatase 2B catalytic subunit 2	LOC411046	XM_026440049.1	2752	ame-miR-3730-5p	23	-20.8 kcal/mol	0.999023
411046	serine/threonine-protein phosphatase 2B catalytic subunit 2	LOC411046	XM_026440049.1	2752	ame-miR-3730-5p	23	-20.4 kcal/mol	0.999789
411046	serine/threonine-protein phosphatase 2B catalytic subunit 2	LOC411046	XM_026440050.1	2716	ame-miR-3730-5p	23	-29.9 kcal/mol	0.070053
411046	serine/threonine-protein phosphatase 2B catalytic subunit 2	LOC411046	XM_026440050.1	2716	ame-miR-3730-5p	23	-26.3 kcal/mol	0.355121
411046	serine/threonine-protein phosphatase 2B catalytic subunit 2	LOC411046	XM_026440050.1	2716	ame-miR-3730-5p	23	-25.6 kcal/mol	0.463318
411046	serine/threonine-protein phosphatase 2B catalytic subunit 2	LOC411046	XM_026440050.1	2716	ame-miR-3730-5p	23	-25.3 kcal/mol	0.514693
411046	serine/threonine-protein phosphatase 2B catalytic subunit 2	LOC411046	XM_026440050.1	2716	ame-miR-3730-5p	23	-24.6 kcal/mol	0.641434
411046	serine/threonine-protein phosphatase 2B catalytic subunit 2	LOC411046	XM_026440050.1	2716	ame-miR-3730-5p	23	-24.1 kcal/mol	0.731973
411046	serine/threonine-protein phosphatase 2B catalytic subunit 2	LOC411046	XM_026440050.1	2716	ame-miR-3730-5p	23	-23.3 kcal/mol	0.859643
411046	serine/threonine-protein phosphatase 2B catalytic subunit 2	LOC411046	XM_026440050.1	2716	ame-miR-3730-5p	23	-22.9 kcal/mol	0.909091
411046	serine/threonine-protein phosphatase 2B catalytic subunit 2	LOC411046	XM_026440050.1	2716	ame-miR-3730-5p	23	-22.7 kcal/mol	0.929339
411046	serine/threonine-protein phosphatase 2B catalytic subunit 2	LOC411046	XM_026440050.1	2716	ame-miR-3730-5p	23	-22.6 kcal/mol	0.938308
411046	serine/threonine-protein phosphatase 2B catalytic subunit 2	LOC411046	XM_026440050.1	2716	ame-miR-3730-5p	23	-22.4 kcal/mol	0.953963
411046	serine/threonine-protein phosphatase 2B catalytic subunit 2	LOC411046	XM_026440050.1	2716	ame-miR-3730-5p	23	-21.2 kcal/mol	0.996325
411046	serine/threonine-protein phosphatase 2B catalytic subunit 2	LOC411046	XM_026440050.1	2716	ame-miR-3730-5p	23	-21.1 kcal/mol	0.997242
411046	serine/threonine-protein phosphatase 2B catalytic subunit 2	LOC411046	XM_026440050.1	2716	ame-miR-3730-5p	23	-20.9 kcal/mol	0.998515
411046	serine/threonine-protein phosphatase 2B catalytic subunit 2	LOC411046	XM_026440050.1	2716	ame-miR-3730-5p	23	-20.8 kcal/mol	0.998937
411046	serine/threonine-protein phosphatase 2B catalytic subunit 2	LOC411046	XM_026440050.1	2716	ame-miR-3730-5p	23	-20.8 kcal/mol	0.998937
411046	serine/threonine-protein phosphatase 2B catalytic subunit 2	LOC411046	XM_026440050.1	2716	ame-miR-3730-5p	23	-20.4 kcal/mol	0.999766
411046	serine/threonine-protein phosphatase 2B catalytic subunit 2	LOC411046	XM_026440051.1	2686	ame-miR-3730-5p	23	-29.9 kcal/mol	0.069044
411046	serine/threonine-protein phosphatase 2B catalytic subunit 2	LOC411046	XM_026440051.1	2686	ame-miR-3730-5p	23	-26.3 kcal/mol	0.351393
411046	serine/threonine-protein phosphatase 2B catalytic subunit 2	LOC411046	XM_026440051.1	2686	ame-miR-3730-5p	23	-25.6 kcal/mol	0.459027
411046	serine/threonine-protein phosphatase 2B catalytic subunit 2	LOC411046	XM_026440051.1	2686	ame-miR-3730-5p	23	-25.3 kcal/mol	0.510236
411046	serine/threonine-protein phosphatase 2B catalytic subunit 2	LOC411046	XM_026440051.1	2686	ame-miR-3730-5p	23	-24.6 kcal/mol	0.636882
411046	serine/threonine-protein phosphatase 2B catalytic subunit 2	LOC411046	XM_026440051.1	2686	ame-miR-3730-5p	23	-24.1 kcal/mol	0.727687
411046	serine/threonine-protein phosphatase 2B catalytic subunit 2	LOC411046	XM_026440051.1	2686	ame-miR-3730-5p	23	-23.3 kcal/mol	0.856395
411046	serine/threonine-protein phosphatase 2B catalytic subunit 2	LOC411046	XM_026440051.1	2686	ame-miR-3730-5p	23	-22.9 kcal/mol	0.90656
411046	serine/threonine-protein phosphatase 2B catalytic subunit 2	LOC411046	XM_026440051.1	2686	ame-miR-3730-5p	23	-22.7 kcal/mol	0.927181
411046	serine/threonine-protein phosphatase 2B catalytic subunit 2	LOC411046	XM_026440051.1	2686	ame-miR-3730-5p	23	-22.6 kcal/mol	0.936335
411046	serine/threonine-protein phosphatase 2B catalytic subunit 2	LOC411046	XM_026440051.1	2686	ame-miR-3730-5p	23	-22.4 kcal/mol	0.952347
411046	serine/threonine-protein phosphatase 2B catalytic subunit 2	LOC411046	XM_026440051.1	2686	ame-miR-3730-5p	23	-21.2 kcal/mol	0.9961
411046	serine/threonine-protein phosphatase 2B catalytic subunit 2	LOC411046	XM_026440051.1	2686	ame-miR-3730-5p	23	-21.1 kcal/mol	0.997065
411046	serine/threonine-protein phosphatase 2B catalytic subunit 2	LOC411046	XM_026440051.1	2686	ame-miR-3730-5p	23	-20.9 kcal/mol	0.998411
411046	serine/threonine-protein phosphatase 2B catalytic subunit 2	LOC411046	XM_026440051.1	2686	ame-miR-3730-5p	23	-20.8 kcal/mol	0.998858
411046	serine/threonine-protein phosphatase 2B catalytic subunit 2	LOC411046	XM_026440051.1	2686	ame-miR-3730-5p	23	-20.8 kcal/mol	0.998858
411046	serine/threonine-protein phosphatase 2B catalytic subunit 2	LOC411046	XM_026440051.1	2686	ame-miR-3730-5p	23	-20.4 kcal/mol	0.999745
411046	serine/threonine-protein phosphatase 2B catalytic subunit 2	LOC411046	XM_026440052.1	2682	ame-miR-3730-5p	23	-29.9 kcal/mol	0.068909
411046	serine/threonine-protein phosphatase 2B catalytic subunit 2	LOC411046	XM_026440052.1	2682	ame-miR-3730-5p	23	-26.3 kcal/mol	0.350894
411046	serine/threonine-protein phosphatase 2B catalytic subunit 2	LOC411046	XM_026440052.1	2682	ame-miR-3730-5p	23	-25.6 kcal/mol	0.458452
411046	serine/threonine-protein phosphatase 2B catalytic subunit 2	LOC411046	XM_026440052.1	2682	ame-miR-3730-5p	23	-25.3 kcal/mol	0.509638
411046	serine/threonine-protein phosphatase 2B catalytic subunit 2	LOC411046	XM_026440052.1	2682	ame-miR-3730-5p	23	-24.6 kcal/mol	0.636271
411046	serine/threonine-protein phosphatase 2B catalytic subunit 2	LOC411046	XM_026440052.1	2682	ame-miR-3730-5p	23	-24.1 kcal/mol	0.72711
411046	serine/threonine-protein phosphatase 2B catalytic subunit 2	LOC411046	XM_026440052.1	2682	ame-miR-3730-5p	23	-23.3 kcal/mol	0.855956
411046	serine/threonine-protein phosphatase 2B catalytic subunit 2	LOC411046	XM_026440052.1	2682	ame-miR-3730-5p	23	-22.9 kcal/mol	0.906217
411046	serine/threonine-protein phosphatase 2B catalytic subunit 2	LOC411046	XM_026440052.1	2682	ame-miR-3730-5p	23	-22.7 kcal/mol	0.926888
411046	serine/threonine-protein phosphatase 2B catalytic subunit 2	LOC411046	XM_026440052.1	2682	ame-miR-3730-5p	23	-22.6 kcal/mol	0.936066
411046	serine/threonine-protein phosphatase 2B catalytic subunit 2	LOC411046	XM_026440052.1	2682	ame-miR-3730-5p	23	-22.4 kcal/mol	0.952127
411046	serine/threonine-protein phosphatase 2B catalytic subunit 2	LOC411046	XM_026440052.1	2682	ame-miR-3730-5p	23	-21.2 kcal/mol	0.996069
411046	serine/threonine-protein phosphatase 2B catalytic subunit 2	LOC411046	XM_026440052.1	2682	ame-miR-3730-5p	23	-21.1 kcal/mol	0.997041
411046	serine/threonine-protein phosphatase 2B catalytic subunit 2	LOC411046	XM_026440052.1	2682	ame-miR-3730-5p	23	-20.9 kcal/mol	0.998396
411046	serine/threonine-protein phosphatase 2B catalytic subunit 2	LOC411046	XM_026440052.1	2682	ame-miR-3730-5p	23	-20.8 kcal/mol	0.998847
411046	serine/threonine-protein phosphatase 2B catalytic subunit 2	LOC411046	XM_026440052.1	2682	ame-miR-3730-5p	23	-20.8 kcal/mol	0.998847
411046	serine/threonine-protein phosphatase 2B catalytic subunit 2	LOC411046	XM_026440052.1	2682	ame-miR-3730-5p	23	-20.4 kcal/mol	0.999742
411046	serine/threonine-protein phosphatase 2B catalytic subunit 2	LOC411046	XM_026440053.1	2680	ame-miR-3730-5p	23	-29.9 kcal/mol	0.068842
411046	serine/threonine-protein phosphatase 2B catalytic subunit 2	LOC411046	XM_026440053.1	2680	ame-miR-3730-5p	23	-26.3 kcal/mol	0.350645
411046	serine/threonine-protein phosphatase 2B catalytic subunit 2	LOC411046	XM_026440053.1	2680	ame-miR-3730-5p	23	-25.6 kcal/mol	0.458165
411046	serine/threonine-protein phosphatase 2B catalytic subunit 2	LOC411046	XM_026440053.1	2680	ame-miR-3730-5p	23	-25.3 kcal/mol	0.509339
411046	serine/threonine-protein phosphatase 2B catalytic subunit 2	LOC411046	XM_026440053.1	2680	ame-miR-3730-5p	23	-24.6 kcal/mol	0.635965
411046	serine/threonine-protein phosphatase 2B catalytic subunit 2	LOC411046	XM_026440053.1	2680	ame-miR-3730-5p	23	-24.1 kcal/mol	0.726821
411046	serine/threonine-protein phosphatase 2B catalytic subunit 2	LOC411046	XM_026440053.1	2680	ame-miR-3730-5p	23	-23.3 kcal/mol	0.855736
411046	serine/threonine-protein phosphatase 2B catalytic subunit 2	LOC411046	XM_026440053.1	2680	ame-miR-3730-5p	23	-22.9 kcal/mol	0.906045
411046	serine/threonine-protein phosphatase 2B catalytic subunit 2	LOC411046	XM_026440053.1	2680	ame-miR-3730-5p	23	-22.7 kcal/mol	0.926741
411046	serine/threonine-protein phosphatase 2B catalytic subunit 2	LOC411046	XM_026440053.1	2680	ame-miR-3730-5p	23	-22.6 kcal/mol	0.935932
411046	serine/threonine-protein phosphatase 2B catalytic subunit 2	LOC411046	XM_026440053.1	2680	ame-miR-3730-5p	23	-22.4 kcal/mol	0.952017
411046	serine/threonine-protein phosphatase 2B catalytic subunit 2	LOC411046	XM_026440053.1	2680	ame-miR-3730-5p	23	-21.2 kcal/mol	0.996053
411046	serine/threonine-protein phosphatase 2B catalytic subunit 2	LOC411046	XM_026440053.1	2680	ame-miR-3730-5p	23	-21.1 kcal/mol	0.997028
411046	serine/threonine-protein phosphatase 2B catalytic subunit 2	LOC411046	XM_026440053.1	2680	ame-miR-3730-5p	23	-20.9 kcal/mol	0.998389
411046	serine/threonine-protein phosphatase 2B catalytic subunit 2	LOC411046	XM_026440053.1	2680	ame-miR-3730-5p	23	-20.8 kcal/mol	0.998842
411046	serine/threonine-protein phosphatase 2B catalytic subunit 2	LOC411046	XM_026440053.1	2680	ame-miR-3730-5p	23	-20.8 kcal/mol	0.998842
411046	serine/threonine-protein phosphatase 2B catalytic subunit 2	LOC411046	XM_026440053.1	2680	ame-miR-3730-5p	23	-20.4 kcal/mol	0.999741
411046	serine/threonine-protein phosphatase 2B catalytic subunit 2	LOC411046	XM_026440054.1	2677	ame-miR-3730-5p	23	-29.9 kcal/mol	0.068741
411046	serine/threonine-protein phosphatase 2B catalytic subunit 2	LOC411046	XM_026440054.1	2677	ame-miR-3730-5p	23	-26.3 kcal/mol	0.35027
411046	serine/threonine-protein phosphatase 2B catalytic subunit 2	LOC411046	XM_026440054.1	2677	ame-miR-3730-5p	23	-25.6 kcal/mol	0.457733
411046	serine/threonine-protein phosphatase 2B catalytic subunit 2	LOC411046	XM_026440054.1	2677	ame-miR-3730-5p	23	-25.3 kcal/mol	0.50889
411046	serine/threonine-protein phosphatase 2B catalytic subunit 2	LOC411046	XM_026440054.1	2677	ame-miR-3730-5p	23	-24.6 kcal/mol	0.635505
411046	serine/threonine-protein phosphatase 2B catalytic subunit 2	LOC411046	XM_026440054.1	2677	ame-miR-3730-5p	23	-24.1 kcal/mol	0.726387
411046	serine/threonine-protein phosphatase 2B catalytic subunit 2	LOC411046	XM_026440054.1	2677	ame-miR-3730-5p	23	-23.3 kcal/mol	0.855405
411046	serine/threonine-protein phosphatase 2B catalytic subunit 2	LOC411046	XM_026440054.1	2677	ame-miR-3730-5p	23	-22.9 kcal/mol	0.905786
411046	serine/threonine-protein phosphatase 2B catalytic subunit 2	LOC411046	XM_026440054.1	2677	ame-miR-3730-5p	23	-22.7 kcal/mol	0.92652
411046	serine/threonine-protein phosphatase 2B catalytic subunit 2	LOC411046	XM_026440054.1	2677	ame-miR-3730-5p	23	-22.6 kcal/mol	0.935729
411046	serine/threonine-protein phosphatase 2B catalytic subunit 2	LOC411046	XM_026440054.1	2677	ame-miR-3730-5p	23	-22.4 kcal/mol	0.951851
411046	serine/threonine-protein phosphatase 2B catalytic subunit 2	LOC411046	XM_026440054.1	2677	ame-miR-3730-5p	23	-21.2 kcal/mol	0.996029
411046	serine/threonine-protein phosphatase 2B catalytic subunit 2	LOC411046	XM_026440054.1	2677	ame-miR-3730-5p	23	-21.1 kcal/mol	0.99701
411046	serine/threonine-protein phosphatase 2B catalytic subunit 2	LOC411046	XM_026440054.1	2677	ame-miR-3730-5p	23	-20.9 kcal/mol	0.998378
411046	serine/threonine-protein phosphatase 2B catalytic subunit 2	LOC411046	XM_026440054.1	2677	ame-miR-3730-5p	23	-20.8 kcal/mol	0.998833
411046	serine/threonine-protein phosphatase 2B catalytic subunit 2	LOC411046	XM_026440054.1	2677	ame-miR-3730-5p	23	-20.8 kcal/mol	0.998833
411046	serine/threonine-protein phosphatase 2B catalytic subunit 2	LOC411046	XM_026440054.1	2677	ame-miR-3730-5p	23	-20.4 kcal/mol	0.999739
411046	serine/threonine-protein phosphatase 2B catalytic subunit 2	LOC411046	XM_026440055.1	1586	ame-miR-3730-5p	23	-24.6 kcal/mol	0.421085
411046	serine/threonine-protein phosphatase 2B catalytic subunit 2	LOC411046	XM_026440055.1	1586	ame-miR-3730-5p	23	-24.1 kcal/mol	0.508715
411046	serine/threonine-protein phosphatase 2B catalytic subunit 2	LOC411046	XM_026440055.1	1586	ame-miR-3730-5p	23	-23.3 kcal/mol	0.661029
411046	serine/threonine-protein phosphatase 2B catalytic subunit 2	LOC411046	XM_026440055.1	1586	ame-miR-3730-5p	23	-22.9 kcal/mol	0.73677
411046	serine/threonine-protein phosphatase 2B catalytic subunit 2	LOC411046	XM_026440055.1	1586	ame-miR-3730-5p	23	-22.7 kcal/mol	0.77294
411046	serine/threonine-protein phosphatase 2B catalytic subunit 2	LOC411046	XM_026440055.1	1586	ame-miR-3730-5p	23	-22.4 kcal/mol	0.82369
411046	serine/threonine-protein phosphatase 2B catalytic subunit 2	LOC411046	XM_026440055.1	1586	ame-miR-3730-5p	23	-21.1 kcal/mol	0.967774
411046	serine/threonine-protein phosphatase 2B catalytic subunit 2	LOC411046	XM_026440055.1	1586	ame-miR-3730-5p	23	-20.4 kcal/mol	0.992994
411046	serine/threonine-protein phosphatase 2B catalytic subunit 2	LOC411046	XM_026440056.1	2655	ame-miR-3730-5p	23	-25.8 kcal/mol	0.42213
411046	serine/threonine-protein phosphatase 2B catalytic subunit 2	LOC411046	XM_026440056.1	2655	ame-miR-3730-5p	23	-25.2 kcal/mol	0.523143
411046	serine/threonine-protein phosphatase 2B catalytic subunit 2	LOC411046	XM_026440056.1	2655	ame-miR-3730-5p	23	-24.6 kcal/mol	0.632115
411046	serine/threonine-protein phosphatase 2B catalytic subunit 2	LOC411046	XM_026440056.1	2655	ame-miR-3730-5p	23	-24.6 kcal/mol	0.632115
411046	serine/threonine-protein phosphatase 2B catalytic subunit 2	LOC411046	XM_026440056.1	2655	ame-miR-3730-5p	23	-24.1 kcal/mol	0.723181
411046	serine/threonine-protein phosphatase 2B catalytic subunit 2	LOC411046	XM_026440056.1	2655	ame-miR-3730-5p	23	-23.3 kcal/mol	0.852954
411046	serine/threonine-protein phosphatase 2B catalytic subunit 2	LOC411046	XM_026440056.1	2655	ame-miR-3730-5p	23	-22.9 kcal/mol	0.903866
411046	serine/threonine-protein phosphatase 2B catalytic subunit 2	LOC411046	XM_026440056.1	2655	ame-miR-3730-5p	23	-22.7 kcal/mol	0.924877
411046	serine/threonine-protein phosphatase 2B catalytic subunit 2	LOC411046	XM_026440056.1	2655	ame-miR-3730-5p	23	-22.4 kcal/mol	0.950615
411046	serine/threonine-protein phosphatase 2B catalytic subunit 2	LOC411046	XM_026440056.1	2655	ame-miR-3730-5p	23	-21.6 kcal/mol	0.988776
411046	serine/threonine-protein phosphatase 2B catalytic subunit 2	LOC411046	XM_026440056.1	2655	ame-miR-3730-5p	23	-21.1 kcal/mol	0.99687
411046	serine/threonine-protein phosphatase 2B catalytic subunit 2	LOC411046	XM_026440056.1	2655	ame-miR-3730-5p	23	-21.1 kcal/mol	0.99687
411046	serine/threonine-protein phosphatase 2B catalytic subunit 2	LOC411046	XM_026440056.1	2655	ame-miR-3730-5p	23	-20.5 kcal/mol	0.999585
411046	serine/threonine-protein phosphatase 2B catalytic subunit 2	LOC411046	XM_026440056.1	2655	ame-miR-3730-5p	23	-20.4 kcal/mol	0.999722
411046	serine/threonine-protein phosphatase 2B catalytic subunit 2	LOC411046	XM_026440056.1	2655	ame-miR-3730-5p	23	-20.1 kcal/mol	0.999926
411046	serine/threonine-protein phosphatase 2B catalytic subunit 2	LOC411046	XM_026440057.1	1752	ame-miR-3730-5p	23	-24.6 kcal/mol	0.460479
411046	serine/threonine-protein phosphatase 2B catalytic subunit 2	LOC411046	XM_026440057.1	1752	ame-miR-3730-5p	23	-24.1 kcal/mol	0.550847
411046	serine/threonine-protein phosphatase 2B catalytic subunit 2	LOC411046	XM_026440057.1	1752	ame-miR-3730-5p	23	-23.3 kcal/mol	0.702851
411046	serine/threonine-protein phosphatase 2B catalytic subunit 2	LOC411046	XM_026440057.1	1752	ame-miR-3730-5p	23	-22.9 kcal/mol	0.775581
411046	serine/threonine-protein phosphatase 2B catalytic subunit 2	LOC411046	XM_026440057.1	1752	ame-miR-3730-5p	23	-22.7 kcal/mol	0.809497
411046	serine/threonine-protein phosphatase 2B catalytic subunit 2	LOC411046	XM_026440057.1	1752	ame-miR-3730-5p	23	-22.4 kcal/mol	0.856029
411046	serine/threonine-protein phosphatase 2B catalytic subunit 2	LOC411046	XM_026440057.1	1752	ame-miR-3730-5p	23	-21.1 kcal/mol	0.977885
411046	serine/threonine-protein phosphatase 2B catalytic subunit 2	LOC411046	XM_026440057.1	1752	ame-miR-3730-5p	23	-20.4 kcal/mol	0.995855
411175	protein groucho	LOC411175	XM_016912552.2	3186	ame-miR-3730-5p	23	-27.8 kcal/mol	0.223322
411175	protein groucho	LOC411175	XM_016912552.2	3186	ame-miR-3730-5p	23	-24.2 kcal/mol	0.774165
411175	protein groucho	LOC411175	XM_016912552.2	3186	ame-miR-3730-5p	23	-23.4 kcal/mol	0.889904
411175	protein groucho	LOC411175	XM_016912552.2	3186	ame-miR-3730-5p	23	-22.3 kcal/mol	0.977464
411175	protein groucho	LOC411175	XM_016912552.2	3186	ame-miR-3730-5p	23	-22.1 kcal/mol	0.984781
411175	protein groucho	LOC411175	XM_016912552.2	3186	ame-miR-3730-5p	23	-22.1 kcal/mol	0.984781
411175	protein groucho	LOC411175	XM_016912552.2	3186	ame-miR-3730-5p	23	-21.5 kcal/mol	0.99639
411175	protein groucho	LOC411175	XM_016912552.2	3186	ame-miR-3730-5p	23	-21.4 kcal/mol	0.997282
411175	protein groucho	LOC411175	XM_016912552.2	3186	ame-miR-3730-5p	23	-21.3 kcal/mol	0.997983
411175	protein groucho	LOC411175	XM_016912552.2	3186	ame-miR-3730-5p	23	-21.2 kcal/mol	0.998525
411175	protein groucho	LOC411175	XM_016912552.2	3186	ame-miR-3730-5p	23	-21.1 kcal/mol	0.998939
411175	protein groucho	LOC411175	XM_016912552.2	3186	ame-miR-3730-5p	23	-21.0 kcal/mol	0.999249
411175	protein groucho	LOC411175	XM_016912552.2	3186	ame-miR-3730-5p	23	-21.0 kcal/mol	0.999249
411175	protein groucho	LOC411175	XM_016912552.2	3186	ame-miR-3730-5p	23	-20.8 kcal/mol	0.999643
411175	protein groucho	LOC411175	XM_394649.6	3706	ame-miR-3730-5p	23	-27.8 kcal/mol	0.261601
411175	protein groucho	LOC411175	XM_394649.6	3706	ame-miR-3730-5p	23	-24.2 kcal/mol	0.825155
411175	protein groucho	LOC411175	XM_394649.6	3706	ame-miR-3730-5p	23	-23.4 kcal/mol	0.923644
411175	protein groucho	LOC411175	XM_394649.6	3706	ame-miR-3730-5p	23	-22.3 kcal/mol	0.987598
411175	protein groucho	LOC411175	XM_394649.6	3706	ame-miR-3730-5p	23	-22.1 kcal/mol	0.992076
411175	protein groucho	LOC411175	XM_394649.6	3706	ame-miR-3730-5p	23	-22.1 kcal/mol	0.992076
411175	protein groucho	LOC411175	XM_394649.6	3706	ame-miR-3730-5p	23	-21.5 kcal/mol	0.998459
411175	protein groucho	LOC411175	XM_394649.6	3706	ame-miR-3730-5p	23	-21.4 kcal/mol	0.998884
411175	protein groucho	LOC411175	XM_394649.6	3706	ame-miR-3730-5p	23	-21.3 kcal/mol	0.999204
411175	protein groucho	LOC411175	XM_394649.6	3706	ame-miR-3730-5p	23	-21.2 kcal/mol	0.999442
411175	protein groucho	LOC411175	XM_394649.6	3706	ame-miR-3730-5p	23	-21.1 kcal/mol	0.999616
411175	protein groucho	LOC411175	XM_394649.6	3706	ame-miR-3730-5p	23	-21.0 kcal/mol	0.99974
411175	protein groucho	LOC411175	XM_394649.6	3706	ame-miR-3730-5p	23	-21.0 kcal/mol	0.99974
411175	protein groucho	LOC411175	XM_394649.6	3706	ame-miR-3730-5p	23	-20.8 kcal/mol	0.999888
411175	protein groucho	LOC411175	XM_394649.6	3706	ame-miR-3730-5p	23	-20.3 kcal/mol	0.999991
411919	Wnt7 protein	LOC411919	XM_006557224.3	2754	ame-miR-3730-5p	23	-25.1 kcal/mol	0.555867
411919	Wnt7 protein	LOC411919	XM_006557224.3	2754	ame-miR-3730-5p	23	-23.5 kcal/mol	0.835241
411919	Wnt7 protein	LOC411919	XM_006557224.3	2754	ame-miR-3730-5p	23	-23.4 kcal/mol	0.849761
411919	Wnt7 protein	LOC411919	XM_006557224.3	2754	ame-miR-3730-5p	23	-22.6 kcal/mol	0.940715
411919	Wnt7 protein	LOC411919	XM_006557224.3	2754	ame-miR-3730-5p	23	-21.6 kcal/mol	0.990471
411919	Wnt7 protein	LOC411919	XM_006557224.3	2754	ame-miR-3730-5p	23	-21.6 kcal/mol	0.990471
411919	Wnt7 protein	LOC411919	XM_006557224.3	2754	ame-miR-3730-5p	23	-21.6 kcal/mol	0.990471
411919	Wnt7 protein	LOC411919	XM_006557224.3	2754	ame-miR-3730-5p	23	-21.5 kcal/mol	0.99249
411919	Wnt7 protein	LOC411919	XM_006557224.3	2754	ame-miR-3730-5p	23	-21.1 kcal/mol	0.997451
411919	Wnt7 protein	LOC411919	XM_006557224.3	2754	ame-miR-3730-5p	23	-20.7 kcal/mol	0.999318
411919	Wnt7 protein	LOC411919	XM_006557224.3	2754	ame-miR-3730-5p	23	-20.3 kcal/mol	0.999864
411919	Wnt7 protein	LOC411919	XM_006557224.3	2754	ame-miR-3730-5p	23	-20.3 kcal/mol	0.999864
411919	Wnt7 protein	LOC411919	XM_016912433.2	2062	ame-miR-3730-5p	23	-23.5 kcal/mol	0.731749
411919	Wnt7 protein	LOC411919	XM_016912433.2	2062	ame-miR-3730-5p	23	-23.3 kcal/mol	0.767256
411919	Wnt7 protein	LOC411919	XM_016912433.2	2062	ame-miR-3730-5p	23	-22.6 kcal/mol	0.875905
411919	Wnt7 protein	LOC411919	XM_016912433.2	2062	ame-miR-3730-5p	23	-21.6 kcal/mol	0.96929
411919	Wnt7 protein	LOC411919	XM_016912433.2	2062	ame-miR-3730-5p	23	-21.1 kcal/mol	0.988893
411919	Wnt7 protein	LOC411919	XM_016912433.2	2062	ame-miR-3730-5p	23	-20.4 kcal/mol	0.998406
411919	Wnt7 protein	LOC411919	XM_016912433.2	2062	ame-miR-3730-5p	23	-20.3 kcal/mol	0.998864
411919	Wnt7 protein	LOC411919	XM_016912435.2	1542	ame-miR-3730-5p	23	-26.7 kcal/mol	0.160315
411919	Wnt7 protein	LOC411919	XM_016912435.2	1542	ame-miR-3730-5p	23	-23.5 kcal/mol	0.610241
411919	Wnt7 protein	LOC411919	XM_016912435.2	1542	ame-miR-3730-5p	23	-23.2 kcal/mol	0.668282
411919	Wnt7 protein	LOC411919	XM_016912435.2	1542	ame-miR-3730-5p	23	-22.6 kcal/mol	0.779853
411919	Wnt7 protein	LOC411919	XM_016912435.2	1542	ame-miR-3730-5p	23	-21.6 kcal/mol	0.922885
411919	Wnt7 protein	LOC411919	XM_016912435.2	1542	ame-miR-3730-5p	23	-21.1 kcal/mol	0.964359
411919	Wnt7 protein	LOC411919	XM_016912435.2	1542	ame-miR-3730-5p	23	-20.3 kcal/mol	0.993786
412108	casein kinase I	LOC412108	XM_006558954.3	4511	ame-miR-3730-5p	23	-25.0 kcal/mol	0.766299
412108	casein kinase I	LOC412108	XM_006558954.3	4511	ame-miR-3730-5p	23	-24.9 kcal/mol	0.782342
412108	casein kinase I	LOC412108	XM_006558954.3	4511	ame-miR-3730-5p	23	-24.7 kcal/mol	0.813192
412108	casein kinase I	LOC412108	XM_006558954.3	4511	ame-miR-3730-5p	23	-22.6 kcal/mol	0.989685
412108	casein kinase I	LOC412108	XM_006558954.3	4511	ame-miR-3730-5p	23	-22.2 kcal/mol	0.996062
412108	casein kinase I	LOC412108	XM_006558954.3	4511	ame-miR-3730-5p	23	-22.1 kcal/mol	0.996997
412108	casein kinase I	LOC412108	XM_006558954.3	4511	ame-miR-3730-5p	23	-21.9 kcal/mol	0.998322
412108	casein kinase I	LOC412108	XM_006558954.3	4511	ame-miR-3730-5p	23	-21.9 kcal/mol	0.998322
412108	casein kinase I	LOC412108	XM_006558954.3	4511	ame-miR-3730-5p	23	-21.7 kcal/mol	0.999116
412108	casein kinase I	LOC412108	XM_006558954.3	4511	ame-miR-3730-5p	23	-21.1 kcal/mol	0.999914
412108	casein kinase I	LOC412108	XM_006558954.3	4511	ame-miR-3730-5p	23	-21.0 kcal/mol	0.999946
412108	casein kinase I	LOC412108	XM_006558954.3	4511	ame-miR-3730-5p	23	-21.0 kcal/mol	0.999946
412108	casein kinase I	LOC412108	XM_006558954.3	4511	ame-miR-3730-5p	23	-20.7 kcal/mol	0.999988
412108	casein kinase I	LOC412108	XM_006558954.3	4511	ame-miR-3730-5p	23	-20.6 kcal/mol	0.999993
412108	casein kinase I	LOC412108	XM_006558954.3	4511	ame-miR-3730-5p	23	-20.3 kcal/mol	0.999999
412108	casein kinase I	LOC412108	XM_006558954.3	4511	ame-miR-3730-5p	23	-20.3 kcal/mol	0.999999
412108	casein kinase I	LOC412108	XM_006558954.3	4511	ame-miR-3730-5p	23	-20.2 kcal/mol	0.999999
412108	casein kinase I	LOC412108	XM_006558954.3	4511	ame-miR-3730-5p	23	-20.0 kcal/mol	1
412108	casein kinase I	LOC412108	XM_006558954.3	4511	ame-miR-3730-5p	23	-20.0 kcal/mol	1
412108	casein kinase I	LOC412108	XM_006558954.3	4511	ame-miR-3730-5p	23	-20.0 kcal/mol	1
412108	casein kinase I	LOC412108	XM_006558956.3	1872	ame-miR-3730-5p	23	-25.1 kcal/mol	0.403048
412108	casein kinase I	LOC412108	XM_006558956.3	1872	ame-miR-3730-5p	23	-25.0 kcal/mol	0.419167
412108	casein kinase I	LOC412108	XM_006558956.3	1872	ame-miR-3730-5p	23	-24.9 kcal/mol	0.435672
412108	casein kinase I	LOC412108	XM_006558956.3	1872	ame-miR-3730-5p	23	-24.7 kcal/mol	0.469769
412108	casein kinase I	LOC412108	XM_006558956.3	1872	ame-miR-3730-5p	23	-22.8 kcal/mol	0.816277
412108	casein kinase I	LOC412108	XM_006558956.3	1872	ame-miR-3730-5p	23	-22.6 kcal/mol	0.847241
412108	casein kinase I	LOC412108	XM_006558956.3	1872	ame-miR-3730-5p	23	-21.9 kcal/mol	0.932673
412108	casein kinase I	LOC412108	XM_006558956.3	1872	ame-miR-3730-5p	23	-21.7 kcal/mol	0.949819
412108	casein kinase I	LOC412108	XM_006558956.3	1872	ame-miR-3730-5p	23	-21.1 kcal/mol	0.983098
412108	casein kinase I	LOC412108	XM_006558956.3	1872	ame-miR-3730-5p	23	-21.0 kcal/mol	0.986388
412108	casein kinase I	LOC412108	XM_006558956.3	1872	ame-miR-3730-5p	23	-20.7 kcal/mol	0.99338
412108	casein kinase I	LOC412108	XM_006558956.3	1872	ame-miR-3730-5p	23	-20.3 kcal/mol	0.99791
412108	casein kinase I	LOC412108	XM_006558956.3	1872	ame-miR-3730-5p	23	-20.0 kcal/mol	0.999258
412108	casein kinase I	LOC412108	XM_006558957.3	2157	ame-miR-3730-5p	23	-25.0 kcal/mol	0.474594
412108	casein kinase I	LOC412108	XM_006558957.3	2157	ame-miR-3730-5p	23	-24.9 kcal/mol	0.492
412108	casein kinase I	LOC412108	XM_006558957.3	2157	ame-miR-3730-5p	23	-24.7 kcal/mol	0.527649
412108	casein kinase I	LOC412108	XM_006558957.3	2157	ame-miR-3730-5p	23	-22.6 kcal/mol	0.888065
412108	casein kinase I	LOC412108	XM_006558957.3	2157	ame-miR-3730-5p	23	-21.9 kcal/mol	0.956275
412108	casein kinase I	LOC412108	XM_006558957.3	2157	ame-miR-3730-5p	23	-21.7 kcal/mol	0.968761
412108	casein kinase I	LOC412108	XM_006558957.3	2157	ame-miR-3730-5p	23	-21.0 kcal/mol	0.992944
412108	casein kinase I	LOC412108	XM_006558957.3	2157	ame-miR-3730-5p	23	-20.7 kcal/mol	0.996891
412108	casein kinase I	LOC412108	XM_006558957.3	2157	ame-miR-3730-5p	23	-20.0 kcal/mol	0.999739
412108	casein kinase I	LOC412108	XM_006558958.2	1561	ame-miR-3730-5p	23	-25.0 kcal/mol	0.35229
412108	casein kinase I	LOC412108	XM_006558958.2	1561	ame-miR-3730-5p	23	-24.9 kcal/mol	0.367305
412108	casein kinase I	LOC412108	XM_006558958.2	1561	ame-miR-3730-5p	23	-24.7 kcal/mol	0.398629
412108	casein kinase I	LOC412108	XM_006558958.2	1561	ame-miR-3730-5p	23	-22.6 kcal/mol	0.784466
412108	casein kinase I	LOC412108	XM_006558958.2	1561	ame-miR-3730-5p	23	-21.9 kcal/mol	0.891138
412108	casein kinase I	LOC412108	XM_006558958.2	1561	ame-miR-3730-5p	23	-21.7 kcal/mol	0.914878
412108	casein kinase I	LOC412108	XM_006558958.2	1561	ame-miR-3730-5p	23	-21.0 kcal/mol	0.971567
[truncated: 10,578 more rows]

## Sheet: ame-mir-6053_targetscan
miRNA_family_ID	gene_symbol	Site_type	gene_id	gene_desc
[truncated: 923 more rows]

## Sheet: ame-mir-6053_Miranda
miRNA	gene_symbol	Score	Energy(kCal/Mol)	gene_id	gene_desc
[truncated: 1,195 more rows]

[truncated: 1 more sheets: ame-mir-6053_RNAhybrid]
