# Supplementary material for: Enterococcus faecium Regulates Honey Bee Developmental Genes
Source: Int J Mol Sci. 2021 Nov 9;22(22):12105. doi: 10.3390/ijms222212105 (PMC8621553; doi:10.3390/ijms222212105)
Supplement: Supplementary file 1 [file ijms-22-12105-s001.zip › TableS10_sRNA-Seq_gene_enrichment.xlsx]

## Sheet: KEGG_enrich_module_miR3730
Term	Database	ID	Input number	Background number	P-Value	Corrected P-Value	Input	Enrich_ratio	Cluster	Cluster_size	Cluster_P-Value_median
Wnt signaling pathway	KEGG PATHWAY	ame04310	34	67	3.0388e-05	0.00343385	551124|410808|551691|412108|408278|726289|413501|413500|409001|107963993|408311|409791|411919|724997|408894|552545|408996|725511|410724|408976|413183|409158|410956|409286|726671|100576247|413616|100576392|552340|409910|411046|410190|724378|406106	0.507463	NA	NA	0.702348
Neuroactive ligand-receptor interaction	KEGG PATHWAY	ame04080	23	38	8.10006e-05	0.00404615	410654|413211|411611|726702|412591|408995|410140|412818|406151|406070|406111|412011|551571|410979|413550|413803|413829|552552|406124|411760|410435|411323|552518	0.605263	NA	NA	0.702348
MAPK signaling pathway - fly	KEGG PATHWAY	ame04013	35	76	0.00010742	0.00404615	408844|725245|410808|100578699|102655329|413504|726289|100577174|410649|413448|411173|552187|408894|726228|409498|726842|412916|406073|409925|725117|724169|410918|100576369|409286|100578885|100577214|410671|725327|413946|100577393|412588|550685|410537|413464|100577697	0.460526	NA	NA	0.702348
Hippo signaling pathway - fly	KEGG PATHWAY	ame04391	25	51	0.000488263	0.0137934	409898|725245|551706|408767|412108|102655329|408616|551176|410009|552545|413669|410604|413423|413834|725591|551369|409904|409286|409348|552079|100576392|413440|408292|724292|100577697	0.490196	NA	NA	0.702348
Dorso-ventral axis formation	KEGG PATHWAY	ame04320	13	23	0.00436433	0.0986338	724704|726681|413289|100577393|408936|412427|100576369|552255|100577214|412916|413448|409925|409780	0.565217	NA	NA	0.702348
Phototransduction - fly	KEGG PATHWAY	ame04745	13	24	0.0057049	0.107442	409020|726798|408996|550818|551691|409937|551176|410823|551369|413197|413224|410489|406106	0.541667	NA	NA	0.702348
FoxO signaling pathway	KEGG PATHWAY	ame04068	19	48	0.0131409	0.212132	409925|727091|408438|413183|411297|724442|408577|409667|725827|412108|550930|410956|409286|412843|413430|413448|410732|100577393|551500	0.395833	NA	NA	0.702348
AGE-RAGE signaling pathway in diabetic complications	KEGG PATHWAY	ame04933	12	28	0.0287172	0.401036	411270|550930|408996|408577|408804|726289|409286|408552|413430|406106|551500|408551	0.428571	NA	NA	0.702348
ECM-receptor interaction	KEGG PATHWAY	ame04512	9	19	0.0359403	0.401036	726871|412663|410775|408393|408826|408551|408552|409924|726736	0.473684	NA	NA	0.702348
Circadian rhythm - fly	KEGG PATHWAY	ame04711	5	7	0.0383391	0.401036	408976|412108|408449|410253|725614	0.714286	NA	NA	0.702348
Apoptosis - fly	KEGG PATHWAY	ame04214	17	48	0.0390389	0.401036	100576819|408844|408521|725245|409227|100577393|726620|406084|408754|724169|100576402|409286|552255|726289|413448|408979|408758	0.354167	NA	NA	0.702348
mTOR signaling pathway	KEGG PATHWAY	ame04150	24	76	0.0431214	0.40606	551124|551093|413501|413500|413448|551500|411919|406106|411297|725511|725827|409925|408976|413430|100576247|409910|408438|408577|412278|100576879|551980|410732|409393|727159	0.315789	NA	NA	0.702348
Purine metabolism	KEGG PATHWAY	ame00230	23	74	0.0529839	0.460552	413274|410482|411635|409422|410379|724603|724389|724571|408699|409444|408879|102654366|408474|726069|408363|100577138|408880|411288|726514|413048|100576217|410539|408299	0.310811	NA	NA	0.702348
Hippo signaling pathway - multiple species	KEGG PATHWAY	ame04392	7	16	0.0795539	0.613909	409898|408767|410009|412108|413440|408292|408616	0.4375	NA	NA	0.702348
Autophagy - animal	KEGG PATHWAY	ame04140	22	75	0.0861265	0.613909	725024|725263|412278|409791|408358|411270|409393|408501|551500|725551|409925|408852|411980|413153|409286|413430|409529|408438|408577|409667|551980|410732	0.293333	NA	NA	0.702348
Notch signaling pathway	KEGG PATHWAY	ame04330	8	20	0.0869251	0.613909	408894|413289|409158|410351|724935|411086|727399|551501	0.4	NA	NA	0.702348
Longevity regulating pathway - multiple species	KEGG PATHWAY	ame04213	13	40	0.100366	0.667136	724442|408438|408363|411297|411296|726514|725827|727091|413430|408577|409791|409393|551500	0.325	NA	NA	0.702348
TGF-beta signaling pathway	KEGG PATHWAY	ame04350	11	33	0.111703	0.701244	408579|409910|550930|725800|100576392|410776|726999|100216325|410035|413371|724378	0.333333	NA	NA	0.702348
Hedgehog signaling pathway - fly	KEGG PATHWAY	ame04341	8	23	0.139934	0.832238	408976|411827|410632|412108|100576449|410831|409791|551746	0.347826	NA	NA	0.702348
Glycine, serine and threonine metabolism	KEGG PATHWAY	ame00260	8	27	0.22971	0.99991	413678|406081|552457|552523|410747|410550|551044|409058	0.296296	NA	NA	0.702348
Retinol metabolism	KEGG PATHWAY	ame00830	4	11	0.239535	0.99991	408788|409260|107965199|552377	0.363636	7	7	0.68154
Phosphatidylinositol signaling system	KEGG PATHWAY	ame04070	13	51	0.278617	0.99991	724991|408809|413817|100576733|408996|408577|408804|725812|413071|411306|551069|551500|406106	0.254902	3	2	0.506062
Other glycan degradation	KEGG PATHWAY	ame00511	4	13	0.321007	0.99991	726818|725194|412838|411490	0.307692	NA	NA	0.702348
beta-Alanine metabolism	KEGG PATHWAY	ame00410	6	22	0.332161	0.99991	408955|408509|409736|408432|551208|102654653	0.272727	1	4	0.432289
Ether lipid metabolism	KEGG PATHWAY	ame00565	5	18	0.346492	0.99991	408869|724436|406141|724942|725119	0.277778	6	3	0.627113
Propanoate metabolism	KEGG PATHWAY	ame00640	7	27	0.34866	0.99991	408955|725482|409736|551208|411189|411188|552286	0.259259	2	4	0.498972
Starch and sucrose metabolism	KEGG PATHWAY	ame00500	5	19	0.382755	0.99991	410795|410484|413346|406114|551005	0.263158	NA	NA	0.702348
Taurine and hypotaurine metabolism	KEGG PATHWAY	ame00430	2	6	0.402724	0.99991	408432|408509	0.333333	1	4	0.432289
Mannose type O-glycan biosynthesis	KEGG PATHWAY	ame00515	2	6	0.402724	0.99991	551749|410005	0.333333	NA	NA	0.702348
Fatty acid biosynthesis	KEGG PATHWAY	ame00061	3	11	0.430191	0.99991	412541|409515|552286	0.272727	10	5	0.714306
Alanine, aspartate and glutamate metabolism	KEGG PATHWAY	ame00250	6	26	0.461855	0.99991	413678|408509|408432|410482|410408|408955	0.230769	1	4	0.432289
Glycosaminoglycan biosynthesis - heparan sulfate / heparin	KEGG PATHWAY	ame00534	3	12	0.477855	0.99991	408293|412956|413242	0.25	NA	NA	0.702348
Nicotinate and nicotinamide metabolism	KEGG PATHWAY	ame00760	3	12	0.477855	0.99991	410539|408299|408474	0.25	4	2	0.516356
Ascorbate and aldarate metabolism	KEGG PATHWAY	ame00053	3	12	0.477855	0.99991	413627|107965199|408788	0.25	7	7	0.68154
Sphingolipid metabolism	KEGG PATHWAY	ame00600	5	22	0.48983	0.99991	408315|724942|727146|409628|408766	0.227273	NA	NA	0.702348
Pyruvate metabolism	KEGG PATHWAY	ame00620	7	32	0.496583	0.99991	411813|725482|412843|100578735|411189|411188|552286	0.21875	2	4	0.498972
Glycolysis / Gluconeogenesis	KEGG PATHWAY	ame00010	9	42	0.501361	0.99991	411576|551005|725482|726225|412843|100578735|411189|411188|550785	0.214286	2	4	0.498972
Fatty acid elongation	KEGG PATHWAY	ame00062	3	13	0.523558	0.99991	551775|411692|725146	0.230769	10	5	0.714306
Glycosaminoglycan biosynthesis - chondroitin sulfate / dermatan sulfate	KEGG PATHWAY	ame00532	2	8	0.523759	0.99991	413549|550998	0.25	NA	NA	0.702348
Non-homologous end-joining	KEGG PATHWAY	ame03450	2	8	0.523759	0.99991	726551|413400	0.25	NA	NA	0.702348
Mucin type O-glycan biosynthesis	KEGG PATHWAY	ame00512	2	8	0.523759	0.99991	410470|411054	0.25	NA	NA	0.702348
Glycerolipid metabolism	KEGG PATHWAY	ame00561	7	33	0.525174	0.99991	408809|552377|724942|413071|411724|551069|409199	0.212121	5	2	0.569539
Phagosome	KEGG PATHWAY	ame04145	12	59	0.549548	0.99991	100577548|413409|410614|551093|552766|410559|411639|551176|412810|551369|552528|406076	0.20339	NA	NA	0.702348
Mitophagy - animal	KEGG PATHWAY	ame04137	7	34	0.553126	0.99991	409529|408852|409667|726289|409286|727091|413464	0.205882	NA	NA	0.702348
Pyrimidine metabolism	KEGG PATHWAY	ame00240	6	29	0.554857	0.99991	412233|410408|410539|408474|102654653|408299	0.206897	4	2	0.516356
Endocytosis	KEGG PATHWAY	ame04144	22	110	0.565415	0.99991	552297|409218|410923|413197|413464|409006|724991|413683|408623|413834|725119|413200|411769|409910|550930|100577393|413410|552414|411463|410632|726993|409851	0.2	NA	NA	0.702348
ABC transporters	KEGG PATHWAY	ame02010	3	14	0.566962	0.99991	725051|409897|551167	0.214286	NA	NA	0.702348
Butanoate metabolism	KEGG PATHWAY	ame00650	3	14	0.566962	0.99991	408955|408509|408432	0.214286	1	4	0.432289
Insect hormone biosynthesis	KEGG PATHWAY	ame00981	3	14	0.566962	0.99991	408398|410495|551179	0.214286	NA	NA	0.702348
Sulfur metabolism	KEGG PATHWAY	ame00920	2	9	0.577756	0.99991	551510|413048	0.222222	9	2	0.710437
Ubiquinone and other terpenoid-quinone biosynthesis	KEGG PATHWAY	ame00130	2	9	0.577756	0.99991	725204|551869	0.222222	12	3	0.772748
SNARE interactions in vesicular transport	KEGG PATHWAY	ame04130	4	20	0.596691	0.99991	102656652|552555|408465|410279	0.2	NA	NA	0.702348
Drug metabolism - cytochrome P450	KEGG PATHWAY	ame00982	3	15	0.607839	0.99991	552283|408788|107965199	0.2	7	7	0.68154
2-Oxocarboxylic acid metabolism	KEGG PATHWAY	ame01210	3	15	0.607839	0.99991	410059|408446|409292	0.2	11	5	0.720638
Glycerophospholipid metabolism	KEGG PATHWAY	ame00564	11	57	0.613904	0.99991	410270|724436|408809|725119|724942|408934|406141|411724|413071|551069|406104	0.192982	5	2	0.569539
alpha-Linolenic acid metabolism	KEGG PATHWAY	ame00592	2	10	0.627113	0.99991	724436|406141	0.2	6	3	0.627113
Glycosphingolipid biosynthesis - globo and isoglobo series	KEGG PATHWAY	ame00603	1	5	0.670833	0.99991	726818	0.2	8	2	0.691483
mRNA surveillance pathway	KEGG PATHWAY	ame03015	11	60	0.673124	0.99991	409961|100578236|551258|551123|409556|409476|411879|410604|409795|412914|551997	0.183333	NA	NA	0.702348
Arachidonic acid metabolism	KEGG PATHWAY	ame00590	3	17	0.68154	0.99991	724436|552283|406141	0.176471	6	3	0.627113
Metabolism of xenobiotics by cytochrome P450	KEGG PATHWAY	ame00980	3	17	0.68154	0.99991	552283|408788|107965199	0.176471	7	7	0.68154
Base excision repair	KEGG PATHWAY	ame03410	4	23	0.692562	0.99991	725551|413086|408649|725801	0.173913	NA	NA	0.702348
Nitrogen metabolism	KEGG PATHWAY	ame00910	2	12	0.712133	0.99991	726898|408827	0.166667	NA	NA	0.702348
One carbon pool by folate	KEGG PATHWAY	ame00670	2	12	0.712133	0.99991	410550|410422	0.166667	NA	NA	0.702348
Glycosaminoglycan degradation	KEGG PATHWAY	ame00531	2	12	0.712133	0.99991	726818|406146	0.166667	8	2	0.691483
Citrate cycle (TCA cycle)	KEGG PATHWAY	ame00020	6	35	0.714036	0.99991	410059|412843|408446|409292|100578735|408734	0.171429	11	5	0.720638
Biosynthesis of unsaturated fatty acids	KEGG PATHWAY	ame01040	3	18	0.714306	0.99991	102654211|411692|725146	0.166667	10	5	0.714306
Glyoxylate and dicarboxylate metabolism	KEGG PATHWAY	ame00630	4	24	0.720638	0.99991	410059|408446|413678|410550	0.166667	11	5	0.720638
Amino sugar and nucleotide sugar metabolism	KEGG PATHWAY	ame00520	7	41	0.724034	0.99991	409759|413705|724540|551005|726818|412215|413481	0.170732	NA	NA	0.702348
Inositol phosphate metabolism	KEGG PATHWAY	ame00562	8	47	0.733507	0.99991	724991|413817|100576733|409736|408996|408804|725812|551500	0.170213	3	2	0.506062
Carbon metabolism	KEGG PATHWAY	ame01200	16	91	0.743315	0.99991	551005|410059|552523|411576|411813|409736|408446|409058|413627|409292|410550|551208|100578735|408734|550785|413678	0.175824	11	5	0.720638
Galactose metabolism	KEGG PATHWAY	ame00052	3	19	0.744398	0.99991	726225|724540|551005	0.157895	NA	NA	0.702348
Thiamine metabolism	KEGG PATHWAY	ame00730	2	13	0.748176	0.99991	410393|102654366	0.153846	NA	NA	0.702348
Fatty acid metabolism	KEGG PATHWAY	ame01212	7	43	0.763572	0.99991	102654211|725146|409515|412541|551775|411692|552286	0.162791	10	5	0.714306
Folate biosynthesis	KEGG PATHWAY	ame00790	3	20	0.771903	0.99991	408930|410393|410422	0.15	NA	NA	0.702348
Phenylalanine metabolism	KEGG PATHWAY	ame00360	1	7	0.772748	0.99991	725204	0.142857	12	3	0.772748
Toll and Imd signaling pathway	KEGG PATHWAY	ame04624	6	38	0.777097	0.99991	411012|412703|724169|726289|409286|409051	0.157895	NA	NA	0.702348
Tyrosine metabolism	KEGG PATHWAY	ame00350	2	14	0.780264	0.99991	725204|408930	0.142857	12	3	0.772748
Glutathione metabolism	KEGG PATHWAY	ame00480	5	33	0.793502	0.99991	410627|412808|551224|552283|725665	0.151515	NA	NA	0.702348
Biosynthesis of amino acids	KEGG PATHWAY	ame01230	8	51	0.802643	0.99991	410059|552523|411576|408446|725204|409058|409292|550785	0.156863	11	5	0.720638
Arginine and proline metabolism	KEGG PATHWAY	ame00330	3	23	0.840112	0.99991	550932|408862|409807	0.130435	NA	NA	0.702348
Other types of O-glycan biosynthesis	KEGG PATHWAY	ame00514	1	9	0.843118	0.99991	551501	0.111111	NA	NA	0.702348
Selenocompound metabolism	KEGG PATHWAY	ame00450	1	9	0.843118	0.99991	413048	0.111111	9	2	0.710437
Pentose and glucuronate interconversions	KEGG PATHWAY	ame00040	2	17	0.855903	0.99991	408788|107965199	0.117647	7	7	0.68154
Fatty acid degradation	KEGG PATHWAY	ame00071	3	24	0.858555	0.99991	551775|412541|409515	0.125	10	5	0.714306
Pantothenate and CoA biosynthesis	KEGG PATHWAY	ame00770	1	10	0.869654	0.99991	102654653	0.1	NA	NA	0.702348
Apoptosis - multiple species	KEGG PATHWAY	ame04215	2	18	0.875276	0.99991	100576819|409286	0.111111	NA	NA	0.702348
Cysteine and methionine metabolism	KEGG PATHWAY	ame00270	5	39	0.886574	0.99991	725204|725482|410798|411189|411188	0.128205	NA	NA	0.702348
Valine, leucine and isoleucine degradation	KEGG PATHWAY	ame00280	4	33	0.892895	0.99991	551775|409736|408955|551208	0.121212	2	4	0.498972
RNA polymerase	KEGG PATHWAY	ame03020	3	27	0.903129	0.99991	725552|102655904|552658	0.111111	NA	NA	0.702348
Pentose phosphate pathway	KEGG PATHWAY	ame00030	2	21	0.919869	0.99991	413627|550785	0.0952381	NA	NA	0.702348
Fructose and mannose metabolism	KEGG PATHWAY	ame00051	2	21	0.919869	0.99991	551005|550785	0.0952381	NA	NA	0.702348
Lysosome	KEGG PATHWAY	ame04142	8	63	0.929991	0.99991	726818|408992|406108|727146|410860|412810|409298|406076	0.126984	NA	NA	0.702348
Autophagy - other	KEGG PATHWAY	ame04136	2	22	0.931045	0.99991	409393|725024	0.0909091	NA	NA	0.702348
Fanconi anemia pathway	KEGG PATHWAY	ame03460	3	30	0.934597	0.99991	411185|100576402|725405	0.1	NA	NA	0.702348
Drug metabolism - other enzymes	KEGG PATHWAY	ame00983	3	30	0.934597	0.99991	102654653|408788|107965199	0.1	7	7	0.68154
Porphyrin and chlorophyll metabolism	KEGG PATHWAY	ame00860	2	23	0.940734	0.99991	408788|107965199	0.0869565	7	7	0.68154
Peroxisome	KEGG PATHWAY	ame04146	7	59	0.944857	0.99991	413678|100578814|413666|412541|412986|409515|551233	0.118644	NA	NA	0.702348
Ribosome biogenesis in eukaryotes	KEGG PATHWAY	ame03008	8	67	0.952329	0.99991	551016|725324|410319|408840|409305|100578399|413805|552439	0.119403	NA	NA	0.702348
N-Glycan biosynthesis	KEGG PATHWAY	ame00510	3	34	0.961983	0.99991	412045|726476|727568	0.0882353	NA	NA	0.702348
Homologous recombination	KEGG PATHWAY	ame03440	2	29	0.976617	0.99991	411185|413400	0.0689655	NA	NA	0.702348
Glycosylphosphatidylinositol (GPI)-anchor biosynthesis	KEGG PATHWAY	ame00563	1	20	0.979582	0.99991	411058	0.05	NA	NA	0.702348
Protein export	KEGG PATHWAY	ame03060	1	20	0.979582	0.99991	552776	0.05	NA	NA	0.702348
Ubiquitin mediated proteolysis	KEGG PATHWAY	ame04120	9	85	0.984867	0.99991	409140|408749|410808|410838|412330|551971|413034|409099|413376	0.105882	NA	NA	0.702348
RNA degradation	KEGG PATHWAY	ame03018	5	58	0.987698	0.99991	411492|408626|408840|412371|100578925	0.0862069	NA	NA	0.702348
Lysine degradation	KEGG PATHWAY	ame00310	2	34	0.989466	0.99991	410155|100577280	0.0588235	NA	NA	0.702348
Terpenoid backbone biosynthesis	KEGG PATHWAY	ame00900	1	26	0.993291	0.99991	412735	0.0384615	NA	NA	0.702348
Metabolic pathways	KEGG PATHWAY	ame01100	129	811	0.997415	0.99991	413274|724336|408766|410627|412045|410379|724436|100576217|726225|413071|725482|410422|551208|406114|410059|725119|408930|413242|410798|102654653|410795|550785|551869|725204|408827|412541|410550|551224|102654211|409628|413481|410484|410482|410005|408955|724991|409807|552377|408788|552523|410408|408293|725665|551005|552283|107965199|408734|413705|413678|411288|406081|408432|412843|410470|552457|55…	0.159063	NA	NA	0.702348
Protein processing in endoplasmic reticulum	KEGG PATHWAY	ame04141	10	113	0.998476	0.99991	408751|409219|408501|409613|409286|551971|412045|409841|552528|727568	0.0884956	NA	NA	0.702348
Nucleotide excision repair	KEGG PATHWAY	ame03420	1	37	0.999129	0.99991	725405	0.027027	NA	NA	0.702348
Spliceosome	KEGG PATHWAY	ame03040	8	104	0.999286	0.99991	107964950|409476|411250|727378|410040|409347|413578|409007	0.0769231	NA	NA	0.702348
Aminoacyl-tRNA biosynthesis	KEGG PATHWAY	ame00970	1	40	0.999501	0.99991	413909	0.025	NA	NA	0.702348
Oxidative phosphorylation	KEGG PATHWAY	ame00190	5	91	0.99987	0.99991	409114|412810|551093|408734|406076	0.0549451	NA	NA	0.702348
RNA transport	KEGG PATHWAY	ame03013	8	120	0.99991	0.99991	552351|100578399|409476|410580|408979|408556|411735|726338	0.0666667	NA	NA	0.702348

## Sheet: KEGG_enrich_module_miR6053
Term	Database	ID	Input number	Background number	P-Value	Corrected P-Value	Input	Enrich_ratio	Cluster	Cluster_size	Cluster_P-Value_median
Neuroactive ligand-receptor interaction	KEGG PATHWAY	ame04080	21	38	2.22e-07	2.09e-05	413803|412591|412011|413829|413211|406124|410979|408995|409042|411760|410140|411611|412818|410435|411323|406151|552518|406070|726702|406111|410654	0.552632	NA	NA	0.528735
Wnt signaling pathway	KEGG PATHWAY	ame04310	27	67	6.65e-07	3.12e-05	551691|412108|413502|413500|409001|107963993|408311|411919|724997|408894|552545|414037|410724|408976|413183|409158|410956|409286|726671|100576247|413616|100576392|552340|724501|411046|410190|552419	0.402985	NA	NA	0.528735
Hippo signaling pathway - fly	KEGG PATHWAY	ame04391	21	51	8.73e-06	0.000273581	726958|412108|552545|410604|551706|413423|408767|409898|413834|100576392|413440|408616|102655329|725591|409348|410009|409286|409904|724292|552079|413502	0.411765	NA	NA	0.528735
MAPK signaling pathway - fly	KEGG PATHWAY	ame04013	24	76	7.31e-05	0.00171725	726958|408844|410649|102655329|100577174|413464|411173|552187|408894|726842|100578885|406073|409925|725117|724169|410918|409286|412916|100578699|410671|725327|413946|100577393|552419	0.315789	NA	NA	0.528735
FoxO signaling pathway	KEGG PATHWAY	ame04068	15	48	0.00171893	0.0323159	410732|412843|413183|100577393|408577|725827|412108|550930|410956|727091|409286|412601|724442|409925|411297	0.3125	NA	NA	0.528735
Circadian rhythm - fly	KEGG PATHWAY	ame04711	5	7	0.00519808	0.0730506	412108|408976|408449|410253|725614	0.714286	NA	NA	0.528735
Phototransduction - fly	KEGG PATHWAY	ame04745	9	24	0.00543994	0.0730506	551859|409020|550818|410823|551691|413224|413197|409937|725453	0.375	NA	NA	0.528735
Notch signaling pathway	KEGG PATHWAY	ame04330	7	20	0.01816	0.21338	408894|413289|409158|410351|411086|727399|551501	0.35	NA	NA	0.528735
Hippo signaling pathway - multiple species	KEGG PATHWAY	ame04392	6	16	0.022021	0.228763	409898|408767|410009|412108|413440|408616	0.375	NA	NA	0.528735
AGE-RAGE signaling pathway in diabetic complications	KEGG PATHWAY	ame04933	8	28	0.0293727	0.228763	411270|550930|408577|408804|409286|412601|552419|408551	0.285714	NA	NA	0.528735
Mucin type O-glycan biosynthesis	KEGG PATHWAY	ame00512	4	8	0.0294888	0.228763	100578215|410470|411054|413987	0.5	NA	NA	0.528735
Hedgehog signaling pathway - fly	KEGG PATHWAY	ame04341	7	23	0.0316375	0.228763	408976|411827|410632|412108|100576449|410831|551746	0.304348	NA	NA	0.528735
Dorso-ventral axis formation	KEGG PATHWAY	ame04320	7	23	0.0316375	0.228763	724704|413289|100577393|552255|412916|409925|409780	0.304348	NA	NA	0.528735
Apoptosis - fly	KEGG PATHWAY	ame04214	11	48	0.0397702	0.267028	726958|408844|408521|408754|100577393|411115|406084|724169|409286|552255|408758	0.229167	NA	NA	0.528735
TGF-beta signaling pathway	KEGG PATHWAY	ame04350	8	33	0.0585154	0.366697	412601|550930|725800|100576392|410776|413457|413371|411627	0.242424	NA	NA	0.528735
Endocytosis	KEGG PATHWAY	ame04144	19	110	0.0773902	0.454667	552297|724991|411769|409418|408783|413683|550930|408623|100577393|413197|413410|413834|412601|411463|413464|413457|410632|726993|409006	0.172727	NA	NA	0.528735
Longevity regulating pathway - multiple species	KEGG PATHWAY	ame04213	8	40	0.122353	0.676538	727091|726514|411297|408577|725827|409418|724442|408363	0.2	NA	NA	0.528735
Phosphatidylinositol signaling system	KEGG PATHWAY	ame04070	9	51	0.16961	0.885743	551859|724991|100576733|410061|408577|408804|406096|413071|551069	0.176471	1	2	0.406896
Nitrogen metabolism	KEGG PATHWAY	ame00910	3	12	0.201138	0.995104	726898|727237|100576224	0.25	NA	NA	0.528735
ECM-receptor interaction	KEGG PATHWAY	ame04512	4	19	0.213992	0.999979	410775|408393|408826|408551	0.210526	NA	NA	0.528735
ABC transporters	KEGG PATHWAY	ame02010	3	14	0.258811	0.999979	414029|409897|551167	0.214286	NA	NA	0.528735
Purine metabolism	KEGG PATHWAY	ame00230	11	74	0.271019	0.999979	410379|100577138|408879|409422|411288|410630|726514|724603|724389|726069|408363	0.148649	NA	NA	0.528735
Autophagy - animal	KEGG PATHWAY	ame04140	11	75	0.283918	0.999979	410257|411270|725024|408852|726637|408577|413153|409286|409925|408358|410732	0.146667	NA	NA	0.528735
mTOR signaling pathway	KEGG PATHWAY	ame04150	11	76	0.296992	0.999979	408976|409925|411919|414037|411297|408577|725827|413502|413500|100576247|410732	0.144737	NA	NA	0.528735
Other types of O-glycan biosynthesis	KEGG PATHWAY	ame00514	2	9	0.321345	0.999979	551425|551501	0.222222	NA	NA	0.528735
Pyruvate metabolism	KEGG PATHWAY	ame00620	5	32	0.342502	0.999979	725482|411187|412876|412843|552286	0.15625	4	4	0.670419
Pentose and glucuronate interconversions	KEGG PATHWAY	ame00040	3	17	0.348142	0.999979	413567|412069|408788	0.176471	NA	NA	0.528735
Apoptosis - multiple species	KEGG PATHWAY	ame04215	3	18	0.377873	0.999979	726958|411115|409286	0.166667	NA	NA	0.528735
Retinol metabolism	KEGG PATHWAY	ame00830	2	11	0.400071	0.999979	408788|552377	0.181818	6	6	0.845771
Fatty acid biosynthesis	KEGG PATHWAY	ame00061	2	11	0.400071	0.999979	412541|552286	0.181818	2	5	0.63293
Starch and sucrose metabolism	KEGG PATHWAY	ame00500	3	19	0.407304	0.999979	551005|410795|412069	0.157895	3	3	0.659778
Folate biosynthesis	KEGG PATHWAY	ame00790	3	20	0.436301	0.999979	408930|410393|411200	0.15	NA	NA	0.528735
Glycosaminoglycan biosynthesis - heparan sulfate / heparin	KEGG PATHWAY	ame00534	2	12	0.437822	0.999979	412956|413242	0.166667	NA	NA	0.528735
Fatty acid elongation	KEGG PATHWAY	ame00062	2	13	0.474235	0.999979	725146|725031	0.153846	2	5	0.63293
Other glycan degradation	KEGG PATHWAY	ame00511	2	13	0.474235	0.999979	412838|411490	0.153846	NA	NA	0.528735
Autophagy - other	KEGG PATHWAY	ame04136	3	22	0.492538	0.999979	410257|726637|725024	0.136364	NA	NA	0.528735
Arginine and proline metabolism	KEGG PATHWAY	ame00330	3	23	0.519595	0.999979	408862|412948|409807	0.130435	NA	NA	0.528735
Taurine and hypotaurine metabolism	KEGG PATHWAY	ame00430	1	6	0.537875	0.999979	726158	0.166667	8	3	0.862728
Mannose type O-glycan biosynthesis	KEGG PATHWAY	ame00515	1	6	0.537875	0.999979	410005	0.166667	NA	NA	0.528735
Glycerolipid metabolism	KEGG PATHWAY	ame00561	4	33	0.549045	0.999979	726880|551069|413071|552377	0.121212	NA	NA	0.528735
Mitophagy - animal	KEGG PATHWAY	ame04137	4	34	0.570807	0.999979	413464|409286|727091|408852	0.117647	NA	NA	0.528735
Citrate cycle (TCA cycle)	KEGG PATHWAY	ame00020	4	35	0.591969	0.999979	409485|413768|412876|412843	0.114286	5	3	0.83977
Propanoate metabolism	KEGG PATHWAY	ame00640	3	27	0.619292	0.999979	725482|411187|552286	0.111111	4	4	0.670419
Biosynthesis of unsaturated fatty acids	KEGG PATHWAY	ame01040	2	18	0.63293	0.999979	725146|725031	0.111111	2	5	0.63293
Inositol phosphate metabolism	KEGG PATHWAY	ame00562	5	47	0.644181	0.999979	406096|724991|410061|408804|100576733	0.106383	1	2	0.406896
Toll and Imd signaling pathway	KEGG PATHWAY	ame04624	4	38	0.65159	0.999979	724169|100578156|409286|409051	0.105263	NA	NA	0.528735
Galactose metabolism	KEGG PATHWAY	ame00052	2	19	0.659778	0.999979	551005|412069	0.105263	3	3	0.659778
mRNA surveillance pathway	KEGG PATHWAY	ame03015	6	60	0.699342	0.999979	409961|100578236|551123|410604|409795|412914	0.1	NA	NA	0.528735
Fructose and mannose metabolism	KEGG PATHWAY	ame00051	2	21	0.708713	0.999979	409963|551005	0.0952381	NA	NA	0.528735
Glycolysis / Gluconeogenesis	KEGG PATHWAY	ame00010	4	42	0.721545	0.999979	725482|411187|551005|412843	0.0952381	4	4	0.670419
Fatty acid metabolism	KEGG PATHWAY	ame01212	4	43	0.737304	0.999979	412541|725031|552286|725146	0.0930233	2	5	0.63293
Base excision repair	KEGG PATHWAY	ame03410	2	23	0.751618	0.999979	408649|413086	0.0869565	NA	NA	0.528735
Ascorbate and aldarate metabolism	KEGG PATHWAY	ame00053	1	12	0.761623	0.999979	408788	0.0833333	6	6	0.845771
Thiamine metabolism	KEGG PATHWAY	ame00730	1	13	0.78653	0.999979	410393	0.0769231	NA	NA	0.528735
Tyrosine metabolism	KEGG PATHWAY	ame00350	1	14	0.808837	0.999979	408930	0.0714286	NA	NA	0.528735
Glycine, serine and threonine metabolism	KEGG PATHWAY	ame00260	2	27	0.821264	0.999979	551044|409058	0.0740741	NA	NA	0.528735
RNA polymerase	KEGG PATHWAY	ame03020	2	27	0.821264	0.999979	725552|102655904	0.0740741	NA	NA	0.528735
Drug metabolism - cytochrome P450	KEGG PATHWAY	ame00982	1	15	0.828814	0.999979	408788	0.0666667	6	6	0.845771
2-Oxocarboxylic acid metabolism	KEGG PATHWAY	ame01210	1	15	0.828814	0.999979	409485	0.0666667	9	2	0.882723
Biosynthesis of amino acids	KEGG PATHWAY	ame01230	4	51	0.83977	0.999979	409485|412948|412876|409058	0.0784314	5	3	0.83977
Homologous recombination	KEGG PATHWAY	ame03440	2	29	0.849055	0.999979	411185|552787	0.0689655	7	2	0.855239
Pyrimidine metabolism	KEGG PATHWAY	ame00240	2	29	0.849055	0.999979	412233|410408	0.0689655	10	2	0.899124
Amino sugar and nucleotide sugar metabolism	KEGG PATHWAY	ame00520	3	41	0.851989	0.999979	551005|412069|413481	0.0731707	3	3	0.659778
Fanconi anemia pathway	KEGG PATHWAY	ame03460	2	30	0.861423	0.999979	411185|552787	0.0666667	7	2	0.855239
Arachidonic acid metabolism	KEGG PATHWAY	ame00590	1	17	0.862728	0.999979	726158	0.0588235	8	3	0.862728
Metabolism of xenobiotics by cytochrome P450	KEGG PATHWAY	ame00980	1	17	0.862728	0.999979	408788	0.0588235	6	6	0.845771
Glycerophospholipid metabolism	KEGG PATHWAY	ame00564	4	57	0.892554	0.999979	410270|551069|406104|413071	0.0701754	NA	NA	0.528735
Glutathione metabolism	KEGG PATHWAY	ame00480	2	33	0.893154	0.999979	726158|408369	0.0606061	8	3	0.862728
RNA degradation	KEGG PATHWAY	ame03018	4	58	0.899688	0.999979	726804|408626|100578925|413944	0.0689655	NA	NA	0.528735
SNARE interactions in vesicular transport	KEGG PATHWAY	ame04130	1	20	0.901434	0.999979	408465	0.05	NA	NA	0.528735
Protein export	KEGG PATHWAY	ame03060	1	20	0.901434	0.999979	726721	0.05	NA	NA	0.528735
Glycosylphosphatidylinositol (GPI)-anchor biosynthesis	KEGG PATHWAY	ame00563	1	20	0.901434	0.999979	411058	0.05	NA	NA	0.528735
Phagosome	KEGG PATHWAY	ame04145	4	59	0.906401	0.999979	725068|412810|552419|726721	0.0677966	NA	NA	0.528735
Tryptophan metabolism	KEGG PATHWAY	ame00380	1	22	0.920967	0.999979	411200	0.0454545	NA	NA	0.528735
Sphingolipid metabolism	KEGG PATHWAY	ame00600	1	22	0.920967	0.999979	411552	0.0454545	NA	NA	0.528735
Porphyrin and chlorophyll metabolism	KEGG PATHWAY	ame00860	1	23	0.929231	0.999979	408788	0.0434783	6	6	0.845771
Glyoxylate and dicarboxylate metabolism	KEGG PATHWAY	ame00630	1	24	0.936632	0.999979	409485	0.0416667	9	2	0.882723
Fatty acid degradation	KEGG PATHWAY	ame00071	1	24	0.936632	0.999979	412541	0.0416667	2	5	0.63293
Cysteine and methionine metabolism	KEGG PATHWAY	ame00270	2	39	0.937359	0.999979	725482|411187	0.0512821	4	4	0.670419
Alanine, aspartate and glutamate metabolism	KEGG PATHWAY	ame00250	1	26	0.949194	0.999979	410408	0.0384615	10	2	0.899124
Peroxisome	KEGG PATHWAY	ame04146	3	59	0.963837	0.999979	412541|102655950|100578814	0.0508475	NA	NA	0.528735
Drug metabolism - other enzymes	KEGG PATHWAY	ame00983	1	30	0.967343	0.999979	408788	0.0333333	6	6	0.845771
Lysosome	KEGG PATHWAY	ame04142	3	63	0.974086	0.999979	412810|410860|408992	0.047619	NA	NA	0.528735
Carbon metabolism	KEGG PATHWAY	ame01200	5	91	0.977217	0.999979	409485|413768|412876|551005|409058	0.0549451	5	3	0.83977
Spliceosome	KEGG PATHWAY	ame03040	6	104	0.978022	0.999979	107964950|408309|551391|409418|726409|409007	0.0576923	NA	NA	0.528735
N-Glycan biosynthesis	KEGG PATHWAY	ame00510	1	34	0.979012	0.999979	726476	0.0294118	NA	NA	0.528735
Lysine degradation	KEGG PATHWAY	ame00310	1	34	0.979012	0.999979	411070	0.0294118	NA	NA	0.528735
Ubiquitin mediated proteolysis	KEGG PATHWAY	ame04120	4	85	0.986827	0.999979	409607|412330|411115|413034	0.0470588	NA	NA	0.528735
RNA transport	KEGG PATHWAY	ame03013	6	120	0.99302	0.999979	412835|410447|725259|100578399|408556|726338	0.05	NA	NA	0.528735
Ribosome biogenesis in eukaryotes	KEGG PATHWAY	ame03008	2	67	0.995575	0.999979	100578399|551016	0.0298507	NA	NA	0.528735
Metabolic pathways	KEGG PATHWAY	ame01100	64	811	0.999555	0.999979	408862|413242|410393|408369|100576733|725482|727237|408804|406096|413567|726158|410005|410379|411200|724991|413768|408879|409807|552377|552286|408363|410061|408788|413071|724336|410795|412876|410408|412810|411054|724603|726476|409422|551005|411490|100578215|408930|724389|725031|412069|413481|726069|411552|551044|551069|409058|409485|100577138|409963|411288|410630|412541|726880|412948|726514|10057…	0.0789149	NA	NA	0.528735
Protein processing in endoplasmic reticulum	KEGG PATHWAY	ame04141	3	113	0.999718	0.999979	409286|409418|726721	0.0265487	NA	NA	0.528735
Oxidative phosphorylation	KEGG PATHWAY	ame00190	1	91	0.999962	0.999979	412810	0.010989	NA	NA	0.528735
Ribosome	KEGG PATHWAY	ame03010	2	120	0.999979	0.999979	409326|552272	0.0166667	NA	NA	0.528735

## Sheet: GO_enrich_miR3730
Category	Term	Count	%	PValue	Genes	List	Total	Pop Hits	Pop Total	Fold Enrichment Bonferroni	Benjamini	FDR
GOTERM_MF_DIRECT	GO:0043565~sequence-specific DNA binding	77	3.17657	1.00127e-17	100577332, 100577410, 408521, 726050, 413558, 726370, 724196, 410643, 725126, 726415, 726538, 724238, 552099, 725327, 408443, 552251, 724307, 551357, 410253, 413366, 725081, 100576369, 410657, 726165, 725671, 410499, 408758, 411104, 725590, 725350, 724422, 410818, 726289, 551594, 412839, 724979, 724934, 411276, 551506, 412840, 727092, 726230, 410304, 408423, 724252, 100577472, 725220, 411315, 725…	923	138	4152	2.50996	3.00382e-15	3.01383e-15	2.98379e-15
GOTERM_BP_DIRECT	GO:0006355~regulation of transcription, DNA-templated	65	2.68152	1.55611e-12	409854, 100578067, 726370, 724196, 410643, 726415, 726538, 724238, 552099, 408443, 726137, 552251, 724307, 551357, 100576405, 413366, 410174, 725671, 409247, 410499, 410334, 411104, 725590, 724422, 410818, 724465, 726247, 412839, 726204, 724934, 552079, 551506, 412840, 411674, 100577543, 410304, 100577472, 725220, 411315, 725302, 726999, 725662, 724412, 726710, 724801, 102655392, 100577365, 72428…	493	151	2671	2.33219	3.48564e-10	3.47012e-10	3.42344e-10
GOTERM_BP_DIRECT	GO:0007275~multicellular organism development	27	1.11386	7.82223e-11	724252, 724196, 411315, 100577393, 410643, 411919, 410808, 100577050, 724238, 552374, 726929, 413500, 411086, 100576247, 100577365, 727035, 410499, 724120, 102654776, 413501, 410818, 551594, 406077, 551124, 551506, 411374, 411373	493	40	2671	3.65705	1.75218e-08	8.72179e-09	8.60445e-09
GOTERM_CC_DIRECT	GO:0016021~integral component of membrane	522	21.5347	1.80606e-09	412986, 412623, 410567, 102655737, 408363, 408364, 408485, 724903, 551957, 412993, 412994, 410573, 100577974, 551717, 100577981, 412636, 102653663, 408478, 411664, 410336, 410578, 409565, 412883, 100577748, 412763, 410585, 100577743, 410229, 408467, 411675, 413977, 412764, 409792, 409670, 408465, 408462, 724925, 410231, 412774, 100576428, 100577635, 411201, 411321, 100577755, 551938, 100578600, 4…	851	1879	3583	1.16966	1.55321e-07	1.55321e-07	1.49903e-07
GOTERM_MF_DIRECT	GO:0004930~G-protein coupled receptor activity	32	1.32013	9.74998e-09	100577231, 409159, 100578662, 724495, 406128, 726130, 725008, 724853, 413040, 100576746, 411760, 412994, 412011, 413582, 100578696, 410755, 408995, 725297, 411323, 410435, 406151, 726702, 406150, 552142, 413829, 726424, 100578739, 406070, 408729, 413698, 552518, 551848	923	53	4152	2.716	2.92499e-06	1.46737e-06	1.45275e-06
GOTERM_MF_DIRECT	GO:0003700~transcription factor activity, sequence-specific DNA binding	48	1.9802	3.28964e-07	100577332, 726230, 100577410, 408423, 726050, 413558, 724252, 410885, 411534, 725126, 725389, 408981, 725327, 726335, 413060, 410253, 102654580, 725081, 412770, 100576369, 411207, 410657, 409227, 726165, 410535, 408852, 410537, 408758, 100576194, 408855, 410259, 410534, 726184, 725350, 724640, 726289, 551594, 726743, 406077, 724979, 411276, 551506, 411133, 100576912, 551804, 727092, 410166, 411296	923	107	4152	2.01796	9.86845e-05	3.30061e-05	3.26771e-05
GOTERM_BP_DIRECT	GO:0006351~transcription, DNA-templated	40	1.65017	1.72051e-06	408521, 100578067, 408423, 413558, 410885, 411534, 406084, 410309, 725327, 724238, 552167, 102654580, 725081, 412770, 411207, 410657, 409227, 726165, 727035, 408852, 413946, 410499, 725331, 100576194, 408910, 408855, 102654776, 102655904, 410818, 724322, 724465, 724640, 725552, 726204, 552658, 411276, 411133, 411374, 727092, 411373	493	103	2671	2.10402	0.000385319	0.000127891	0.00012617
GOTERM_BP_DIRECT	GO:0007165~signal transduction	30	1.23762	2.41392e-06	412703, 410229, 410246, 408945, 409836, 551043, 409774, 410902, 408264, 551258, 411980, 410231, 552604, 411288, 100577138, 410514, 411209, 409006, 410235, 100578055, 411502, 410632, 410896, 410456, 724389, 552265, 100578939, 100578818, 410044, 414021	493	68	2671	2.39023	0.000540572	0.000134576	0.000132765
GOTERM_CC_DIRECT	GO:0030054~cell junction	16	0.660066	5.47952e-05	406124, 410788, 408645, 406148, 413803, 724143, 102653800, 410478, 725996, 408450, 551010, 726214, 551680, 409040, 412993, 411220	851	24	3583	2.80689	0.00470143	0.0023562	0.002274
GOTERM_MF_DIRECT	GO:0004383~guanylate cyclase activity	8	0.330033	0.000168841	100576683, 411635, 408879, 724571, 413596, 409422, 408880, 413274	923	8	4152	4.49837	0.0493949	0.0127053	0.0125787
GOTERM_MF_DIRECT	GO:0005509~calcium ion binding	43	1.77393	0.000281973	408721, 412825, 409018, 408764, 413977, 409318, 410368, 408405, 409779, 725964, 102655737, 409774, 724217, 724997, 551385, 406141, 100577815, 552546, 413785, 552528, 552209, 410013, 411086, 100577456, 412914, 411748, 410950, 411502, 408393, 551291, 408690, 408451, 409881, 409782, 408694, 551069, 100577629, 551848, 411693, 411157, 410585, 410386, 413210	923	115	4152	1.682	0.0811237	0.0169748	0.0168056
GOTERM_BP_DIRECT	GO:0055085~transmembrane transport	31	1.27888	0.000417355	409899, 410920, 412925, 410626, 408646, 412764, 409131, 724430, 726278, 726578, 552202, 551871, 552505, 411186, 411065, 413263, 410018, 409467, 412777, 409924, 408517, 410278, 408935, 725470, 409043, 725015, 408272, 724546, 411052, 413551, 100578314	493	90	2671	1.86615	0.0892683	0.018614	0.0183636
GOTERM_CC_DIRECT	GO:0005578~proteinaceous extracellular matrix	13	0.536304	0.000541174	408579, 724391, 412888, 411502, 413501, 411919, 409774, 408552, 552374, 408551, 413500, 100577456, 413021	851	20	3583	2.73672	0.0454865	0.0155136	0.0149725
GOTERM_BP_DIRECT	GO:0035556~intracellular signal transduction	22	0.907591	0.000706369	100576683, 411635, 408577, 408879, 413448, 406106, 413834, 724571, 552162, 409680, 409422, 409498, 408363, 408880, 551069, 411290, 413071, 100576217, 413892, 408809, 410261, 413274	493	57	2671	2.0911	0.146391	0.0262534	0.0259002
GOTERM_MF_DIRECT	GO:0004713~protein tyrosine kinase activity	10	0.412541	0.00084919	410190, 413052, 412747, 412667, 411213, 411201, 413596, 409937, 408278, 725720	923	14	4152	3.21312	0.224979	0.042601	0.0421764
GOTERM_CC_DIRECT	GO:0045211~postsynaptic membrane	11	0.453795	0.00103479	410788, 408645, 406148, 724143, 102653800, 410478, 725996, 412993, 411220, 551010, 726214	851	16	3583	2.89461	0.0851889	0.0222479	0.0214718
GOTERM_BP_DIRECT	GO:0007156~homophilic cell adhesion via plasma membrane adhesion molecules	8	0.330033	0.00424304	413977, 552546, 410368, 551848, 411157, 102655737, 410585, 413210	493	13	2671	3.33406	0.614211	0.135171	0.133353
GOTERM_MF_DIRECT	GO:0008237~metallopeptidase activity	10	0.412541	0.00865918	551224, 408536, 409231, 551180, 409619, 552078, 551121, 412808, 412926, 412263	923	18	4152	2.4991	0.926397	0.343142	0.339722
GOTERM_MF_DIRECT	GO:0046872~metal ion binding	90	3.71287	0.00912006	724150, 410723, 408446, 100577696, 726254, 413998, 107964206, 100577174, 413834, 100577692, 100578262, 724156, 102654726, 726179, 410804, 726850, 409498, 551121, 726335, 551360, 551086, 725885, 410291, 409172, 409729, 724908, 100577138, 412074, 100576963, 102656661, 100578984, 410371, 100578226, 413448, 724389, 725754, 102654959, 410539, 552286, 724787, 408474, 412161, 552157, 725945, 410189, 414…	923	321	4152	1.26123	0.935981	0.343142	0.339722
GOTERM_CC_DIRECT	GO:0005634~nucleus	125	5.15677	0.00948996	100577332, 408521, 413558, 726370, 724196, 411534, 726415, 726538, 724238, 725327, 552099, 726137, 552251, 100576405, 100576369, 725272, 100576131, 725671, 100577980, 408758, 724465, 100216325, 726247, 552079, 411276, 410464, 724252, 100577472, 725220, 411315, 724412, 726710, 413060, 724801, 411166, 102654580, 411960, 412770, 100577365, 408852, 725331, 102655824, 724120, 411048, 408855, 724640, 5…	851	437	3583	1.20433	0.559583	0.163227	0.157533
GOTERM_MF_DIRECT	GO:0008061~chitin binding	15	0.618812	0.0131862	413705, 100577331, 102653655, 100576184, 102655639, 413481, 551323, 552724, 725813, 102655072, 411343, 100577576, 412088, 413021, 413560	923	35	4152	1.92787	0.981355	0.441006	0.436611
GOTERM_BP_DIRECT	GO:0006030~chitin metabolic process	12	0.49505	0.0137804	551323, 100577331, 552724, 725813, 100576184, 102655072, 102655639, 411343, 100577576, 412088, 413021, 413560	493	30	2671	2.16714	0.955322	0.384128	0.37896
GOTERM_MF_DIRECT	GO:0003707~steroid hormone receptor activity	6	0.247525	0.0163452	409227, 413558, 408855, 102654580, 410309, 725327	923	8	4152	3.37378	0.992875	0.491991	0.487087
GOTERM_CC_DIRECT	GO:0005576~extracellular region	38	1.56766	0.0169669	406146, 100577331, 410884, 102653655, 411830, 408789, 100576184, 410467, 725366, 102655639, 724436, 406141, 726478, 102654729, 406088, 551597, 413481, 552244, 552724, 725813, 725616, 102655072, 411343, 413386, 100577576, 413560, 413705, 410337, 100576130, 724246, 724563, 726526, 503505, 551323, 724319, 100576956, 102656552, 412088	851	113	3583	1.41587	0.770459	0.243192	0.234709
GOTERM_MF_DIRECT	GO:0005249~voltage-gated potassium channel activity	7	0.288779	0.0193648	408576, 100577254, 410498, 409845, 406072, 551845, 408343	923	11	4152	2.8626	0.997167	0.51106	0.505966
GOTERM_BP_DIRECT	GO:0035023~regulation of Rho protein signal transduction	7	0.288779	0.0201861	408830, 413677, 410044, 412354, 410804, 413562, 410718	493	13	2671	2.9173	0.989621	0.500166	0.493437
GOTERM_MF_DIRECT	GO:0005234~extracellular-glutamate-gated ion channel activity	8	0.330033	0.0203745	410788, 408645, 552552, 100577496, 102653800, 412993, 411220, 412949	923	14	4152	2.5705	0.99792	0.51106	0.505966
GOTERM_MF_DIRECT	GO:0005215~transporter activity	19	0.783828	0.0269021	409899, 410018, 410626, 409467, 408935, 409924, 409649, 408361, 409670, 409043, 726278, 724546, 410915, 409650, 727007, 107964020, 552149, 100577409, 551703	923	52	4152	1.64364	0.99972	0.528119	0.522855
GOTERM_MF_DIRECT	GO:0004672~protein kinase activity	22	0.907591	0.0271542	411812, 102656656, 408501, 412108, 725150, 409952, 408664, 412747, 408830, 410427, 724571, 410685, 413633, 410732, 726790, 410489, 409422, 406092, 413510, 411980, 413385, 413152	923	63	4152	1.57086	0.999741	0.528119	0.522855
GOTERM_MF_DIRECT	GO:0003774~motor activity	6	0.247525	0.0301328	412092, 409787, 410489, 409937, 551706, 409530	923	9	4152	2.99892	0.999897	0.528119	0.522855
GOTERM_MF_DIRECT	GO:0005267~potassium channel activity	6	0.247525	0.0301328	725219, 413106, 411036, 411958, 413020, 724864	923	9	4152	2.99892	0.999897	0.528119	0.522855
GOTERM_CC_DIRECT	GO:0031225~anchored component of membrane	5	0.206271	0.0311408	410291, 409231, 100577019, 551121, 412926	851	6	3583	3.50862	0.934171	0.382587	0.369241
GOTERM_MF_DIRECT	GO:0005230~extracellular ligand-gated ion channel activity	7	0.288779	0.0315819	406124, 552785, 406148, 413803, 409040, 408450, 551680	923	12	4152	2.62405	0.999934	0.528119	0.522855
GOTERM_MF_DIRECT	GO:0005328~neurotransmitter:sodium symporter activity	7	0.288779	0.0315819	411181, 102654427, 410578, 725346, 411199, 411729, 412285	923	12	4152	2.62405	0.999934	0.528119	0.522855
GOTERM_BP_DIRECT	GO:0016055~Wnt signaling pathway	6	0.247525	0.0362638	102654533, 413501, 411919, 413500, 552374, 100576247	493	11	2671	2.95519	0.999745	0.808683	0.797803
GOTERM_CC_DIRECT	GO:0016459~myosin complex	6	0.247525	0.0394518	412092, 409787, 410489, 409937, 551706, 409530	851	9	3583	2.80689	0.96862	0.418627	0.404024
GOTERM_CC_DIRECT	GO:0005891~voltage-gated calcium channel complex	4	0.165017	0.0438098	551883, 408764, 100578899, 408430	851	4	3583	4.21034	0.978777	0.418627	0.404024
GOTERM_BP_DIRECT	GO:0051056~regulation of small GTPase mediated signal transduction	4	0.165017	0.0463426	408780, 412278, 412130, 413473	493	5	2671	4.33428	0.999976	0.861199	0.849614
GOTERM_BP_DIRECT	GO:0030036~actin cytoskeleton organization	4	0.165017	0.0463426	724518, 410922, 410506, 410904	493	5	2671	4.33428	0.999976	0.861199	0.849614
GOTERM_MF_DIRECT	GO:0004715~non-membrane spanning protein tyrosine kinase activity	5	0.206271	0.047465	409127, 412588, 413464, 410649, 409908	923	7	4152	3.21312	1	0.708891	0.701825
GOTERM_MF_DIRECT	GO:0005089~Rho guanyl-nucleotide exchange factor activity	7	0.288779	0.0478915	408830, 413677, 410044, 412354, 410804, 413562, 410718	923	13	4152	2.4222	1	0.708891	0.701825
GOTERM_MF_DIRECT	GO:0004889~acetylcholine-activated cation-selective channel activity	6	0.247525	0.0494575	406148, 724143, 410478, 725996, 551010, 726214	923	10	4152	2.69902	1	0.708891	0.701825
GOTERM_CC_DIRECT	GO:0005887~integral component of plasma membrane	6	0.247525	0.0638269	408489, 410685, 726702, 406111, 413906, 411086	851	10	3583	2.5262	0.996559	0.548911	0.529763
GOTERM_BP_DIRECT	GO:0019752~carboxylic acid metabolic process	6	0.247525	0.0735149	725482, 411188, 408509, 411771, 411189, 408432	493	13	2671	2.50055	1	1	0.990991
GOTERM_MF_DIRECT	GO:0004970~ionotropic glutamate receptor activity	8	0.330033	0.0828611	410788, 408645, 552552, 100577496, 102653800, 412993, 411220, 412949	923	18	4152	1.99928	1	1	0.993333
GOTERM_BP_DIRECT	GO:0045944~positive regulation of transcription from RNA polymerase II promoter	3	0.123762	0.0891832	413946, 726184, 724322	493	3	2671	5.41785	1	1	0.990991
GOTERM_BP_DIRECT	GO:0007205~protein kinase C-activating G-protein coupled receptor signaling pathway	3	0.123762	0.0891832	551069, 413071, 408809	493	3	2671	5.41785	1	1	0.990991
GOTERM_MF_DIRECT	GO:0022891~substrate-specific transmembrane transporter activity	9	0.371287	0.0937096	409424, 100577385, 408478, 551957, 413576, 413575, 100578810, 724874, 552592	923	22	4152	1.84024	1	1	0.993333
GOTERM_BP_DIRECT	GO:0007166~cell surface receptor signaling pathway	5	0.206271	0.09433	100578662, 551848, 552142, 724853, 413829	493	10	2671	2.70892	1	1	0.990991

## Sheet: GO_enrich_miR6053
Category	Term	Count	%	PValue	Genes	List	Total	Pop Hits	Pop Total	Fold Enrichment Bonferroni	Benjamini	FDR
GOTERM_MF_DIRECT	GO:0043565~sequence-specific DNA binding	54	3.8599	9.54673e-15	100577332, 408521, 413558, 724196, 410643, 725126, 724796, 726415, 726538, 724238, 552099, 725327, 408443, 552251, 724307, 551357, 410253, 725081, 410657, 726165, 410499, 408758, 725590, 724422, 551594, 724979, 724934, 411276, 551825, 551506, 412840, 727092, 726230, 410304, 408423, 724252, 724373, 725220, 411315, 406084, 408981, 410309, 724412, 726710, 413060, 100577365, 724282, 725495, 724120, 4…	535	138	4152	3.03681	1.92868e-12	1.93799e-12	1.91889e-12
GOTERM_BP_DIRECT	GO:0006355~regulation of transcription, DNA-templated	47	3.35954	6.26301e-12	410304, 100578067, 724373, 725220, 724196, 411315, 410643, 724796, 726415, 726538, 724238, 552099, 408443, 552031, 552251, 724412, 726710, 724307, 551357, 100576405, 100578826, 410174, 100577365, 724282, 410637, 408411, 727035, 725495, 410499, 724120, 725590, 102654776, 724422, 726469, 408890, 408894, 726247, 726204, 406077, 724934, 552079, 551506, 412840, 411674, 410684, 411175, 100577543	289	151	2671	2.87672	9.39449e-10	9.33189e-10	9.08136e-10
GOTERM_BP_DIRECT	GO:0007275~multicellular organism development	22	1.57255	4.78264e-11	100577365, 727035, 410499, 724120, 724252, 102654776, 724196, 411315, 100577393, 410643, 413502, 411919, 551594, 724238, 552374, 406077, 726929, 551506, 413500, 414037, 411086, 100576247	289	40	2671	5.08322	7.17396e-09	3.56306e-09	3.46741e-09
GOTERM_MF_DIRECT	GO:0004930~G-protein coupled receptor activity	23	1.64403	1.60434e-07	408985, 410755, 406068, 408995, 411323, 410435, 406151, 726702, 409042, 406150, 552142, 724237, 724853, 413829, 726424, 406070, 100576746, 411760, 408729, 412994, 552518, 412011, 413582	535	53	4152	3.36787	3.24071e-05	1.6284e-05	1.61236e-05
GOTERM_CC_DIRECT	GO:0005634~nucleus	91	6.50465	8.06416e-06	100577332, 408521, 413912, 100578067, 413558, 724196, 410885, 411534, 410643, 725126, 724796, 726415, 726538, 724238, 552099, 725327, 408443, 102654608, 552251, 724307, 551357, 100576405, 725081, 100576688, 410657, 408711, 726165, 410535, 411627, 100577980, 408676, 410499, 408758, 102653940, 410259, 410534, 725590, 724422, 724146, 551594, 726247, 726204, 411070, 724934, 552079, 411192, 411276, 55…	486	437	3583	1.53522	0.000459554	0.000363082	0.000343972
GOTERM_CC_DIRECT	GO:0005578~proteinaceous extracellular matrix	12	0.857756	1.32863e-05	724391, 412887, 412888, 413502, 411919, 413500, 414037, 409774, 552374, 408551, 413021, 100577456	486	20	3583	4.42346	0.000757039	0.000363082	0.000343972
GOTERM_MF_DIRECT	GO:0003700~transcription factor activity, sequence-specific DNA binding	31	2.21587	1.76193e-05	100577332, 726230, 408423, 413558, 724252, 410885, 411534, 725126, 408981, 725327, 726335, 413060, 410253, 725081, 410657, 726165, 410535, 408852, 408758, 408855, 410259, 410534, 551594, 406077, 724979, 411276, 551825, 551506, 411133, 551804, 727092	535	107	4152	2.24844	0.0035528	0.00119224	0.00118049
GOTERM_BP_DIRECT	GO:0006351~transcription, DNA-templated	27	1.92995	1.77747e-05	408521, 100578067, 408423, 413558, 410885, 411534, 406084, 410309, 725327, 724238, 725081, 410657, 726165, 727035, 408852, 413946, 410499, 408910, 408855, 102654776, 102655904, 725552, 726204, 411276, 551825, 411133, 727092	289	103	2671	2.42272	0.00266268	0.000882811	0.000859112
GOTERM_CC_DIRECT	GO:0030054~cell junction	13	0.929235	1.91096e-05	406124, 410788, 408645, 406148, 413803, 724143, 725996, 551010, 726214, 551680, 409040, 412993, 411220	486	24	3583	3.9934	0.00108866	0.000363082	0.000343972
GOTERM_MF_DIRECT	GO:0005509~calcium ion binding	32	2.28735	3.00618e-05	408721, 412825, 409018, 411659, 408764, 409318, 410368, 409779, 102655737, 409774, 724217, 724997, 552546, 413785, 551859, 552209, 410013, 411086, 100577456, 412914, 411748, 408393, 408690, 409782, 408694, 551069, 409061, 100577629, 411330, 411157, 410585, 413210	535	115	4152	2.15951	0.00605418	0.00152564	0.00151061
GOTERM_BP_DIRECT	GO:0007165~signal transduction	20	1.42959	5.66101e-05	410514, 409006, 411209, 410229, 410630, 410632, 410456, 724389, 552265, 409774, 551043, 408264, 100578939, 100578818, 100576924, 410044, 410497, 552604, 411288, 100577138	289	68	2671	2.7183	0.00845579	0.00210872	0.00205211
GOTERM_BP_DIRECT	GO:0016055~Wnt signaling pathway	7	0.500357	0.000431464	102654533, 413502, 411919, 413500, 414037, 552374, 100576247	289	11	2671	5.88141	0.0626828	0.0128576	0.0125125
GOTERM_CC_DIRECT	GO:0045211~postsynaptic membrane	9	0.643317	0.000505339	410788, 408645, 406148, 724143, 725996, 412993, 411220, 551010, 726214	486	16	3583	4.14699	0.0284005	0.00720108	0.00682208
GOTERM_BP_DIRECT	GO:0007156~homophilic cell adhesion via plasma membrane adhesion molecules	7	0.500357	0.00132775	409061, 552546, 410368, 411157, 102655737, 410585, 413210	289	13	2671	4.97658	0.180692	0.0329724	0.0320873
GOTERM_MF_DIRECT	GO:0005234~extracellular-glutamate-gated ion channel activity	7	0.500357	0.00530475	102653640, 410788, 408645, 100576097, 412993, 411220, 412949	535	14	4152	3.88037	0.658501	0.215373	0.213251
GOTERM_CC_DIRECT	GO:0005887~integral component of plasma membrane	6	0.428878	0.00624541	100578300, 408489, 410685, 726702, 406111, 411086	486	10	3583	4.42346	0.300301	0.0711976	0.0674504
GOTERM_BP_DIRECT	GO:0035023~regulation of Rho protein signal transduction	6	0.428878	0.00872735	408830, 410044, 412354, 410804, 413562, 410718	289	13	2671	4.26564	0.731485	0.185768	0.180781
GOTERM_MF_DIRECT	GO:0005230~extracellular ligand-gated ion channel activity	6	0.428878	0.0125889	406124, 552785, 406148, 413803, 409040, 551680	535	12	4152	3.88037	0.922625	0.425924	0.421727
GOTERM_MF_DIRECT	GO:0005089~Rho guanyl-nucleotide exchange factor activity	6	0.428878	0.0183348	408830, 410044, 412354, 410804, 413562, 410718	535	13	4152	3.58188	0.976199	0.468982	0.464362
GOTERM_MF_DIRECT	GO:0046872~metal ion binding	55	3.93138	0.0190603	724150, 726254, 413998, 100577174, 100577295, 413834, 726179, 410804, 551121, 726335, 551360, 551086, 409573, 725885, 551430, 410291, 409172, 409729, 100577138, 102656661, 412876, 100576293, 724389, 725754, 552286, 414025, 100576534, 100577543, 410549, 413457, 408822, 724334, 726318, 412926, 408661, 413466, 100578529, 412254, 411288, 413385, 408577, 411126, 410630, 102654975, 725776, 410918, 4082…	535	321	4152	1.32972	0.9795	0.468982	0.464362
GOTERM_MF_DIRECT	GO:0004970~ionotropic glutamate receptor activity	7	0.500357	0.0209057	102653640, 410788, 408645, 100576097, 412993, 411220, 412949	535	18	4152	3.01807	0.985986	0.468982	0.464362
GOTERM_MF_DIRECT	GO:0004713~protein tyrosine kinase activity	6	0.428878	0.0255738	410190, 412667, 409061, 411213, 411201, 409937	535	14	4152	3.32603	0.994663	0.468982	0.464362
GOTERM_MF_DIRECT	GO:0003677~DNA binding	41	2.93066	0.0271478	406123, 408521, 100578067, 408649, 408822, 410885, 725189, 410309, 724535, 102654608, 107964189, 552031, 551432, 552787, 100576405, 412254, 100577998, 100576688, 100577678, 413086, 410535, 412878, 408411, 412955, 727035, 100577980, 412876, 410534, 410874, 726469, 724146, 725552, 725697, 725532, 726204, 551364, 552079, 411133, 410442, 411674, 100576993	535	231	4152	1.37745	0.99615	0.468982	0.464362
GOTERM_MF_DIRECT	GO:0005215~transporter activity	13	0.929235	0.0290857	410626, 414029, 409670, 409043, 410915, 409650, 727007, 107964020, 552149, 100577409, 410683, 551703, 551806	535	52	4152	1.94019	0.997426	0.468982	0.464362
GOTERM_MF_DIRECT	GO:0004889~acetylcholine-activated cation-selective channel activity	5	0.357398	0.0300333	406148, 724143, 725996, 551010, 726214	535	10	4152	3.88037	0.997887	0.468982	0.464362
GOTERM_CC_DIRECT	GO:0016021~integral component of membrane	275	19.6569	0.030384	406068, 100578389, 411412, 410567, 102655737, 551165, 724237, 408363, 724903, 725318, 551957, 412993, 412994, 410573, 100576522, 408478, 100576097, 410336, 724466, 724348, 412763, 410585, 408908, 725460, 410229, 414029, 409792, 409670, 409674, 408465, 408462, 724137, 411201, 100577635, 411321, 100188940, 100578600, 102653640, 100578059, 412777, 413987, 411323, 406151, 406150, 725211, 551010, 4094…	486	1879	3583	1.07899	0.827739	0.288648	0.273456
GOTERM_BP_DIRECT	GO:0008355~olfactory learning	3	0.214439	0.0322865	408973, 724217, 409003	289	3	2671	9.24221	0.992722	0.599647	0.583549
GOTERM_CC_DIRECT	GO:0031225~anchored component of membrane	4	0.285919	0.0359395	410291, 100577019, 551121, 412926	486	6	3583	4.91495	0.87585	0.29265	0.277247
GOTERM_BP_DIRECT	GO:0006030~chitin metabolic process	8	0.571837	0.0362203	551323, 552724, 102655072, 102655639, 411343, 100577576, 412088, 413021	289	30	2671	2.46459	0.996049	0.599647	0.583549
GOTERM_MF_DIRECT	GO:0005249~voltage-gated potassium channel activity	5	0.357398	0.0425112	408576, 410498, 409845, 406072, 408343	535	11	4152	3.52761	0.999845	0.613178	0.607136
GOTERM_MF_DIRECT	GO:0005245~voltage-gated calcium channel activity	3	0.214439	0.0453087	408764, 100578899, 408430	535	3	4152	7.76075	0.999914	0.613178	0.607136
GOTERM_CC_DIRECT	GO:0005886~plasma membrane	24	1.71551	0.045483	406124, 100577024, 413803, 725384, 410368, 411611, 409670, 406151, 102655737, 406150, 551680, 412949, 409650, 552785, 409040, 552546, 551643, 100577409, 411760, 100577019, 411157, 100577888, 410585, 413210	486	119	3583	1.48688	0.929585	0.324067	0.307011
GOTERM_MF_DIRECT	GO:0004114~3',5'-cyclic-nucleotide phosphodiesterase activity	4	0.285919	0.0497078	410630, 724389, 411288, 100577138	535	7	4152	4.43471	0.999966	0.630667	0.624454
GOTERM_MF_DIRECT	GO:0008061~chitin binding	9	0.643317	0.0716237	551323, 413481, 552724, 102655072, 102655639, 411343, 100577576, 412088, 413021	535	35	4152	1.99562	1	0.813311	0.805298
GOTERM_MF_DIRECT	GO:0003707~steroid hormone receptor activity	4	0.285919	0.0721163	413558, 408855, 410309, 725327	535	8	4152	3.88037	1	0.813311	0.805298
GOTERM_CC_DIRECT	GO:0005891~voltage-gated calcium channel complex	3	0.214439	0.0910012	408764, 100578899, 408430	486	4	3583	5.52932	0.995654	0.576341	0.546007
